# Supplementary material for: Weakly Positioned Nucleosomes Enhance the Transcriptional Competency of Chromatin
Source: PubMed Central journal article supplement (PMC2945322; doi:10.1371/journal.pone.0012984), 2010-09-24
Supplement: pone.0012984.s006.pdf [file pone.0012984.s006.pdf]

**Supplementary Table 2.**

| No. | Gene<br><i>exps. symbol</i> | Accession | Experiments        |        |         |         |        |        |                       |        |        |         |         |        |        |
|-----|-----------------------------|-----------|--------------------|--------|---------|---------|--------|--------|-----------------------|--------|--------|---------|---------|--------|--------|
|     |                             |           | With cross-linking |        |         |         |        |        | Without cross-linking |        |        |         |         |        |        |
| 13  | SGV1                        | YPR161C   | YPDcl2             | YPDcl3 | EtOHcl1 | EtOHcl2 | Galcl1 | YPDnc1 | YPDnc2                | YPDnc3 | YPDnc4 | EtOHnc1 | EtOHnc2 | Galnc1 | Galnc2 |
| 13  | RTC1                        | YOL138C   | YPDcl2             | YPDcl3 | EtOHcl1 | EtOHcl2 | Galcl1 | YPDnc1 | YPDnc2                | YPDnc3 | YPDnc4 | EtOHnc1 | EtOHnc2 | Galnc1 | Galnc2 |
| 13  | RHO1                        | YPR165W   | YPDcl2             | YPDcl3 | EtOHcl1 | EtOHcl2 | Galcl1 | YPDnc1 | YPDnc2                | YPDnc3 | YPDnc4 | EtOHnc1 | EtOHnc2 | Galnc1 | Galnc2 |
| 13  | HST2                        | YPL015C   | YPDcl2             | YPDcl3 | EtOHcl1 | EtOHcl2 | Galcl1 | YPDnc1 | YPDnc2                | YPDnc3 | YPDnc4 | EtOHnc1 | EtOHnc2 | Galnc1 | Galnc2 |
| 13  | APA1                        | YCL050C   | YPDcl2             | YPDcl3 | EtOHcl1 | EtOHcl2 | Galcl1 | YPDnc1 | YPDnc2                | YPDnc3 | YPDnc4 | EtOHnc1 | EtOHnc2 | Galnc1 | Galnc2 |
| 13  |                             | YLR031W   | YPDcl2             | YPDcl3 | EtOHcl1 | EtOHcl2 | Galcl1 | YPDnc1 | YPDnc2                | YPDnc3 | YPDnc4 | EtOHnc1 | EtOHnc2 | Galnc1 | Galnc2 |
| 13  |                             | YIL014C-A | YPDcl2             | YPDcl3 | EtOHcl1 | EtOHcl2 | Galcl1 | YPDnc1 | YPDnc2                | YPDnc3 | YPDnc4 | EtOHnc1 | EtOHnc2 | Galnc1 | Galnc2 |
| 13  |                             | YGR053C   | YPDcl2             | YPDcl3 | EtOHcl1 | EtOHcl2 | Galcl1 | YPDnc1 | YPDnc2                | YPDnc3 | YPDnc4 | EtOHnc1 | EtOHnc2 | Galnc1 | Galnc2 |
| 13  | SBH1                        | YER087C-B | YPDcl2             | YPDcl3 | EtOHcl1 | EtOHcl2 | Galcl1 | YPDnc1 | YPDnc2                | YPDnc3 | YPDnc4 | EtOHnc1 | EtOHnc2 | Galnc1 | Galnc2 |
| 13  | FSH3                        | YOR280C   | YPDcl2             | YPDcl3 | EtOHcl1 | EtOHcl2 | Galcl1 | YPDnc1 | YPDnc2                | YPDnc3 | YPDnc4 | EtOHnc1 | EtOHnc2 | Galnc1 | Galnc2 |
| 13  | ASK10                       | YGR097W   | YPDcl2             | YPDcl3 | EtOHcl1 | EtOHcl2 | Galcl1 | YPDnc1 | YPDnc2                | YPDnc3 | YPDnc4 | EtOHnc1 | EtOHnc2 | Galnc1 | Galnc2 |
| 13  | PAN3                        | YKL025C   | YPDcl2             | YPDcl3 | EtOHcl1 | EtOHcl2 | Galcl1 | YPDnc1 | YPDnc2                | YPDnc3 | YPDnc4 | EtOHnc1 | EtOHnc2 | Galnc1 | Galnc2 |
| 13  |                             | YKR011C   | YPDcl2             | YPDcl3 | EtOHcl1 | EtOHcl2 | Galcl1 | YPDnc1 | YPDnc2                | YPDnc3 | YPDnc4 | EtOHnc1 | EtOHnc2 | Galnc1 | Galnc2 |
| 13  | YEA4                        | YEL004W   | YPDcl2             | YPDcl3 | EtOHcl1 | EtOHcl2 | Galcl1 | YPDnc1 | YPDnc2                | YPDnc3 | YPDnc4 | EtOHnc1 | EtOHnc2 | Galnc1 | Galnc2 |
| 13  | ACO2                        | YJL200C   | YPDcl2             | YPDcl3 | EtOHcl1 | EtOHcl2 | Galcl1 | YPDnc1 | YPDnc2                | YPDnc3 | YPDnc4 | EtOHnc1 | EtOHnc2 | Galnc1 | Galnc2 |
| 13  | ISA1                        | YLL027W   | YPDcl2             | YPDcl3 | EtOHcl1 | EtOHcl2 | Galcl1 | YPDnc1 | YPDnc2                | YPDnc3 | YPDnc4 | EtOHnc1 | EtOHnc2 | Galnc1 | Galnc2 |
| 13  |                             | YOR024W   | YPDcl2             | YPDcl3 | EtOHcl1 | EtOHcl2 | Galcl1 | YPDnc1 | YPDnc2                | YPDnc3 | YPDnc4 | EtOHnc1 | EtOHnc2 | Galnc1 | Galnc2 |
| 13  | STU2                        | YLR045C   | YPDcl2             | YPDcl3 | EtOHcl1 | EtOHcl2 | Galcl1 | YPDnc1 | YPDnc2                | YPDnc3 | YPDnc4 | EtOHnc1 | EtOHnc2 | Galnc1 | Galnc2 |
| 13  |                             | YDR348C   | YPDcl2             | YPDcl3 | EtOHcl1 | EtOHcl2 | Galcl1 | YPDnc1 | YPDnc2                | YPDnc3 | YPDnc4 | EtOHnc1 | EtOHnc2 | Galnc1 | Galnc2 |
| 13  | CUL3                        | YGR003W   | YPDcl2             | YPDcl3 | EtOHcl1 | EtOHcl2 | Galcl1 | YPDnc1 | YPDnc2                | YPDnc3 | YPDnc4 | EtOHnc1 | EtOHnc2 | Galnc1 | Galnc2 |
| 13  |                             | YLL007C   | YPDcl2             | YPDcl3 | EtOHcl1 | EtOHcl2 | Galcl1 | YPDnc1 | YPDnc2                | YPDnc3 | YPDnc4 | EtOHnc1 | EtOHnc2 | Galnc1 | Galnc2 |
| 13  | WHI5                        | YOR083W   | YPDcl2             | YPDcl3 | EtOHcl1 | EtOHcl2 | Galcl1 | YPDnc1 | YPDnc2                | YPDnc3 | YPDnc4 | EtOHnc1 | EtOHnc2 | Galnc1 | Galnc2 |
| 13  | EDC3                        | YEL015W   | YPDcl2             | YPDcl3 | EtOHcl1 | EtOHcl2 | Galcl1 | YPDnc1 | YPDnc2                | YPDnc3 | YPDnc4 | EtOHnc1 | EtOHnc2 | Galnc1 | Galnc2 |
| 13  | PEX3                        | YDR329C   | YPDcl2             | YPDcl3 | EtOHcl1 | EtOHcl2 | Galcl1 | YPDnc1 | YPDnc2                | YPDnc3 | YPDnc4 | EtOHnc1 | EtOHnc2 | Galnc1 | Galnc2 |
| 13  | DUT1                        | YBR252W   | YPDcl2             | YPDcl3 | EtOHcl1 | EtOHcl2 | Galcl1 | YPDnc1 | YPDnc2                | YPDnc3 | YPDnc4 | EtOHnc1 | EtOHnc2 | Galnc1 | Galnc2 |
| 13  | CRG1                        | YHR209W   | YPDcl2             | YPDcl3 | EtOHcl1 | EtOHcl2 | Galcl1 | YPDnc1 | YPDnc2                | YPDnc3 | YPDnc4 | EtOHnc1 | EtOHnc2 | Galnc1 | Galnc2 |
| 13  | PTP3                        | YER075C   | YPDcl2             | YPDcl3 | EtOHcl1 | EtOHcl2 | Galcl1 | YPDnc1 | YPDnc2                | YPDnc3 | YPDnc4 | EtOHnc1 | EtOHnc2 | Galnc1 | Galnc2 |
| 13  | ACK1                        | YDL203C   | YPDcl2             | YPDcl3 | EtOHcl1 | EtOHcl2 | Galcl1 | YPDnc1 | YPDnc2                | YPDnc3 | YPDnc4 | EtOHnc1 | EtOHnc2 | Galnc1 | Galnc2 |
| 13  | VTI1                        | YMR197C   | YPDcl2             | YPDcl3 | EtOHcl1 | EtOHcl2 | Galcl1 | YPDnc1 | YPDnc2                | YPDnc3 | YPDnc4 | EtOHnc1 | EtOHnc2 | Galnc1 | Galnc2 |
| 13  | GIP2                        | YER054C   | YPDcl2             | YPDcl3 | EtOHcl1 | EtOHcl2 | Galcl1 | YPDnc1 | YPDnc2                | YPDnc3 | YPDnc4 | EtOHnc1 | EtOHnc2 | Galnc1 | Galnc2 |
| 13  | HNT2                        | YDR305C   | YPDcl2             | YPDcl3 | EtOHcl1 | EtOHcl2 | Galcl1 | YPDnc1 | YPDnc2                | YPDnc3 | YPDnc4 | EtOHnc1 | EtOHnc2 | Galnc1 | Galnc2 |

|           |           |        |        |         |         |        |        |        |        |        |         |         |        |        |
|-----------|-----------|--------|--------|---------|---------|--------|--------|--------|--------|--------|---------|---------|--------|--------|
| 13        | YHL019W-  | YPDcl2 | YPDcl3 | EtOHcl1 | EtOHcl2 | Galcl1 | YPDnc1 | YPDnc2 | YPDnc3 | YPDnc4 | EtOHnc1 | EtOHnc2 | Galnc1 | Galnc2 |
| 13 PSY2   | YNL201C   | YPDcl2 | YPDcl3 | EtOHcl1 | EtOHcl2 | Galcl1 | YPDnc1 | YPDnc2 | YPDnc3 | YPDnc4 | EtOHnc1 | EtOHnc2 | Galnc1 | Galnc2 |
| 13        | YBR206W   | YPDcl2 | YPDcl3 | EtOHcl1 | EtOHcl2 | Galcl1 | YPDnc1 | YPDnc2 | YPDnc3 | YPDnc4 | EtOHnc1 | EtOHnc2 | Galnc1 | Galnc2 |
| 13 OYE3   | YPL171C   | YPDcl2 | YPDcl3 | EtOHcl1 | EtOHcl2 | Galcl1 | YPDnc1 | YPDnc2 | YPDnc3 | YPDnc4 | EtOHnc1 | EtOHnc2 | Galnc1 | Galnc2 |
| 13 CDC36  | YDL165W   | YPDcl2 | YPDcl3 | EtOHcl1 | EtOHcl2 | Galcl1 | YPDnc1 | YPDnc2 | YPDnc3 | YPDnc4 | EtOHnc1 | EtOHnc2 | Galnc1 | Galnc2 |
| 13        | YPL119C-A | YPDcl2 | YPDcl3 | EtOHcl1 | EtOHcl2 | Galcl1 | YPDnc1 | YPDnc2 | YPDnc3 | YPDnc4 | EtOHnc1 | EtOHnc2 | Galnc1 | Galnc2 |
| 13 SSL2   | YIL143C   | YPDcl2 | YPDcl3 | EtOHcl1 | EtOHcl2 | Galcl1 | YPDnc1 | YPDnc2 | YPDnc3 | YPDnc4 | EtOHnc1 | EtOHnc2 | Galnc1 | Galnc2 |
| 13        | YBR292C   | YPDcl2 | YPDcl3 | EtOHcl1 | EtOHcl2 | Galcl1 | YPDnc1 | YPDnc2 | YPDnc3 | YPDnc4 | EtOHnc1 | EtOHnc2 | Galnc1 | Galnc2 |
| 13 PFK1   | YGR240C   | YPDcl2 | YPDcl3 | EtOHcl1 | EtOHcl2 | Galcl1 | YPDnc1 | YPDnc2 | YPDnc3 | YPDnc4 | EtOHnc1 | EtOHnc2 | Galnc1 | Galnc2 |
| 13 TAF10  | YDR167W   | YPDcl2 | YPDcl3 | EtOHcl1 | EtOHcl2 | Galcl1 | YPDnc1 | YPDnc2 | YPDnc3 | YPDnc4 | EtOHnc1 | EtOHnc2 | Galnc1 | Galnc2 |
| 13 HOM3   | YER052C   | YPDcl2 | YPDcl3 | EtOHcl1 | EtOHcl2 | Galcl1 | YPDnc1 | YPDnc2 | YPDnc3 | YPDnc4 | EtOHnc1 | EtOHnc2 | Galnc1 | Galnc2 |
| 13 RPO26  | YPR187W   | YPDcl2 | YPDcl3 | EtOHcl1 | EtOHcl2 | Galcl1 | YPDnc1 | YPDnc2 | YPDnc3 | YPDnc4 | EtOHnc1 | EtOHnc2 | Galnc1 | Galnc2 |
| 13 PBP1   | YGR178C   | YPDcl2 | YPDcl3 | EtOHcl1 | EtOHcl2 | Galcl1 | YPDnc1 | YPDnc2 | YPDnc3 | YPDnc4 | EtOHnc1 | EtOHnc2 | Galnc1 | Galnc2 |
| 13 PPM2   | YOL141W   | YPDcl2 | YPDcl3 | EtOHcl1 | EtOHcl2 | Galcl1 | YPDnc1 | YPDnc2 | YPDnc3 | YPDnc4 | EtOHnc1 | EtOHnc2 | Galnc1 | Galnc2 |
| 13 MRPL36 | YBR122C   | YPDcl2 | YPDcl3 | EtOHcl1 | EtOHcl2 | Galcl1 | YPDnc1 | YPDnc2 | YPDnc3 | YPDnc4 | EtOHnc1 | EtOHnc2 | Galnc1 | Galnc2 |
| 13        | YHR095W   | YPDcl2 | YPDcl3 | EtOHcl1 | EtOHcl2 | Galcl1 | YPDnc1 | YPDnc2 | YPDnc3 | YPDnc4 | EtOHnc1 | EtOHnc2 | Galnc1 | Galnc2 |
| 13 PAF1   | YBR279W   | YPDcl2 | YPDcl3 | EtOHcl1 | EtOHcl2 | Galcl1 | YPDnc1 | YPDnc2 | YPDnc3 | YPDnc4 | EtOHnc1 | EtOHnc2 | Galnc1 | Galnc2 |
| 13 FMP42  | YMR221C   | YPDcl2 | YPDcl3 | EtOHcl1 | EtOHcl2 | Galcl1 | YPDnc1 | YPDnc2 | YPDnc3 | YPDnc4 | EtOHnc1 | EtOHnc2 | Galnc1 | Galnc2 |
| 13 BUD26  | YDR241W   | YPDcl2 | YPDcl3 | EtOHcl1 | EtOHcl2 | Galcl1 | YPDnc1 | YPDnc2 | YPDnc3 | YPDnc4 | EtOHnc1 | EtOHnc2 | Galnc1 | Galnc2 |
| 13 COM2   | YER130C   | YPDcl2 | YPDcl3 | EtOHcl1 | EtOHcl2 | Galcl1 | YPDnc1 | YPDnc2 | YPDnc3 | YPDnc4 | EtOHnc1 | EtOHnc2 | Galnc1 | Galnc2 |
| 13 CNS1   | YBR155W   | YPDcl2 | YPDcl3 | EtOHcl1 | EtOHcl2 | Galcl1 | YPDnc1 | YPDnc2 | YPDnc3 | YPDnc4 | EtOHnc1 | EtOHnc2 | Galnc1 | Galnc2 |
| 13 ESC2   | YDR363W   | YPDcl2 | YPDcl3 | EtOHcl1 | EtOHcl2 | Galcl1 | YPDnc1 | YPDnc2 | YPDnc3 | YPDnc4 | EtOHnc1 | EtOHnc2 | Galnc1 | Galnc2 |
| 13 ECM7   | YLR443W   | YPDcl2 | YPDcl3 | EtOHcl1 | EtOHcl2 | Galcl1 | YPDnc1 | YPDnc2 | YPDnc3 | YPDnc4 | EtOHnc1 | EtOHnc2 | Galnc1 | Galnc2 |
| 13 FUN19  | YAL034C   | YPDcl2 | YPDcl3 | EtOHcl1 | EtOHcl2 | Galcl1 | YPDnc1 | YPDnc2 | YPDnc3 | YPDnc4 | EtOHnc1 | EtOHnc2 | Galnc1 | Galnc2 |
| 13        | YPR084W   | YPDcl2 | YPDcl3 | EtOHcl1 | EtOHcl2 | Galcl1 | YPDnc1 | YPDnc2 | YPDnc3 | YPDnc4 | EtOHnc1 | EtOHnc2 | Galnc1 | Galnc2 |
| 13 FOL3   | YMR113W   | YPDcl2 | YPDcl3 | EtOHcl1 | EtOHcl2 | Galcl1 | YPDnc1 | YPDnc2 | YPDnc3 | YPDnc4 | EtOHnc1 | EtOHnc2 | Galnc1 | Galnc2 |
| 13        | YBR184W   | YPDcl2 | YPDcl3 | EtOHcl1 | EtOHcl2 | Galcl1 | YPDnc1 | YPDnc2 | YPDnc3 | YPDnc4 | EtOHnc1 | EtOHnc2 | Galnc1 | Galnc2 |
| 13 SIT1   | YEL065W   | YPDcl2 | YPDcl3 | EtOHcl1 | EtOHcl2 | Galcl1 | YPDnc1 | YPDnc2 | YPDnc3 | YPDnc4 | EtOHnc1 | EtOHnc2 | Galnc1 | Galnc2 |
| 13        | YFR018C   | YPDcl2 | YPDcl3 | EtOHcl1 | EtOHcl2 | Galcl1 | YPDnc1 | YPDnc2 | YPDnc3 | YPDnc4 | EtOHnc1 | EtOHnc2 | Galnc1 | Galnc2 |
| 13 CAP1   | YKL007W   | YPDcl2 | YPDcl3 | EtOHcl1 | EtOHcl2 | Galcl1 | YPDnc1 | YPDnc2 | YPDnc3 | YPDnc4 | EtOHnc1 | EtOHnc2 | Galnc1 | Galnc2 |
| 13 NOP6   | YDL213C   | YPDcl2 | YPDcl3 | EtOHcl1 | EtOHcl2 | Galcl1 | YPDnc1 | YPDnc2 | YPDnc3 | YPDnc4 | EtOHnc1 | EtOHnc2 | Galnc1 | Galnc2 |
| 13 SSN2   | YDR443C   | YPDcl2 | YPDcl3 | EtOHcl1 | EtOHcl2 | Galcl1 | YPDnc1 | YPDnc2 | YPDnc3 | YPDnc4 | EtOHnc1 | EtOHnc2 | Galnc1 | Galnc2 |
| 13 PUS4   | YNL292W   | YPDcl2 | YPDcl3 | EtOHcl1 | EtOHcl2 | Galcl1 | YPDnc1 | YPDnc2 | YPDnc3 | YPDnc4 | EtOHnc1 | EtOHnc2 | Galnc1 | Galnc2 |
| 13        | YKL100C   | YPDcl2 | YPDcl3 | EtOHcl1 | EtOHcl2 | Galcl1 | YPDnc1 | YPDnc2 | YPDnc3 | YPDnc4 | EtOHnc1 | EtOHnc2 | Galnc1 | Galnc2 |

|           |         |        |        |         |         |        |        |        |        |        |         |         |        |        |
|-----------|---------|--------|--------|---------|---------|--------|--------|--------|--------|--------|---------|---------|--------|--------|
| 13 ECM37  | YIL146C | YPDcl2 | YPDcl3 | EtOHcl1 | EtOHcl2 | Galcl1 | YPDnc1 | YPDnc2 | YPDnc3 | YPDnc4 | EtOHnc1 | EtOHnc2 | Galnc1 | Galnc2 |
| 13 MGS1   | YNL218W | YPDcl2 | YPDcl3 | EtOHcl1 | EtOHcl2 | Galcl1 | YPDnc1 | YPDnc2 | YPDnc3 | YPDnc4 | EtOHnc1 | EtOHnc2 | Galnc1 | Galnc2 |
| 13 QDR2   | YIL121W | YPDcl2 | YPDcl3 | EtOHcl1 | EtOHcl2 | Galcl1 | YPDnc1 | YPDnc2 | YPDnc3 | YPDnc4 | EtOHnc1 | EtOHnc2 | Galnc1 | Galnc2 |
| 13 NRP1   | YDL167C | YPDcl2 | YPDcl3 | EtOHcl1 | EtOHcl2 | Galcl1 | YPDnc1 | YPDnc2 | YPDnc3 | YPDnc4 | EtOHnc1 | EtOHnc2 | Galnc1 | Galnc2 |
| 13 THI6   | YPL214C | YPDcl2 | YPDcl3 | EtOHcl1 | EtOHcl2 | Galcl1 | YPDnc1 | YPDnc2 | YPDnc3 | YPDnc4 | EtOHnc1 | EtOHnc2 | Galnc1 | Galnc2 |
| 13 ETC7   | YOR228C | YPDcl2 | YPDcl3 | EtOHcl1 | EtOHcl2 | Galcl1 | YPDnc1 | YPDnc2 | YPDnc3 | YPDnc4 | EtOHnc1 | EtOHnc2 | Galnc1 | Galnc2 |
| 13 BIT2   | YBR270C | YPDcl2 | YPDcl3 | EtOHcl1 | EtOHcl2 | Galcl1 | YPDnc1 | YPDnc2 | YPDnc3 | YPDnc4 | EtOHnc1 | EtOHnc2 | Galnc1 | Galnc2 |
| 13 PET54  | YGR222W | YPDcl2 | YPDcl3 | EtOHcl1 | EtOHcl2 | Galcl1 | YPDnc1 | YPDnc2 | YPDnc3 | YPDnc4 | EtOHnc1 | EtOHnc2 | Galnc1 | Galnc2 |
| 13 CAN1   | YEL063C | YPDcl2 | YPDcl3 | EtOHcl1 | EtOHcl2 | Galcl1 | YPDnc1 | YPDnc2 | YPDnc3 | YPDnc4 | EtOHnc1 | EtOHnc2 | Galnc1 | Galnc2 |
| 13        | YML020W | YPDcl2 | YPDcl3 | EtOHcl1 | EtOHcl2 | Galcl1 | YPDnc1 | YPDnc2 | YPDnc3 | YPDnc4 | EtOHnc1 | EtOHnc2 | Galnc1 | Galnc2 |
| 13 SSO2   | YMR183C | YPDcl2 | YPDcl3 | EtOHcl1 | EtOHcl2 | Galcl1 | YPDnc1 | YPDnc2 | YPDnc3 | YPDnc4 | EtOHnc1 | EtOHnc2 | Galnc1 | Galnc2 |
| 13 MOD5   | YOR274W | YPDcl2 | YPDcl3 | EtOHcl1 | EtOHcl2 | Galcl1 | YPDnc1 | YPDnc2 | YPDnc3 | YPDnc4 | EtOHnc1 | EtOHnc2 | Galnc1 | Galnc2 |
| 13 LSM5   | YER146W | YPDcl2 | YPDcl3 | EtOHcl1 | EtOHcl2 | Galcl1 | YPDnc1 | YPDnc2 | YPDnc3 | YPDnc4 | EtOHnc1 | EtOHnc2 | Galnc1 | Galnc2 |
| 13        | YOL035C | YPDcl2 | YPDcl3 | EtOHcl1 | EtOHcl2 | Galcl1 | YPDnc1 | YPDnc2 | YPDnc3 | YPDnc4 | EtOHnc1 | EtOHnc2 | Galnc1 | Galnc2 |
| 13 HMG1   | YML075C | YPDcl2 | YPDcl3 | EtOHcl1 | EtOHcl2 | Galcl1 | YPDnc1 | YPDnc2 | YPDnc3 | YPDnc4 | EtOHnc1 | EtOHnc2 | Galnc1 | Galnc2 |
| 13 PIG1   | YLR273C | YPDcl2 | YPDcl3 | EtOHcl1 | EtOHcl2 | Galcl1 | YPDnc1 | YPDnc2 | YPDnc3 | YPDnc4 | EtOHnc1 | EtOHnc2 | Galnc1 | Galnc2 |
| 13 SAS4   | YDR181C | YPDcl2 | YPDcl3 | EtOHcl1 | EtOHcl2 | Galcl1 | YPDnc1 | YPDnc2 | YPDnc3 | YPDnc4 | EtOHnc1 | EtOHnc2 | Galnc1 | Galnc2 |
| 13 SRM1   | YGL097W | YPDcl2 | YPDcl3 | EtOHcl1 | EtOHcl2 | Galcl1 | YPDnc1 | YPDnc2 | YPDnc3 | YPDnc4 | EtOHnc1 | EtOHnc2 | Galnc1 | Galnc2 |
| 13        | YCL056C | YPDcl2 | YPDcl3 | EtOHcl1 | EtOHcl2 | Galcl1 | YPDnc1 | YPDnc2 | YPDnc3 | YPDnc4 | EtOHnc1 | EtOHnc2 | Galnc1 | Galnc2 |
| 13        | YMR242W | YPDcl2 | YPDcl3 | EtOHcl1 | EtOHcl2 | Galcl1 | YPDnc1 | YPDnc2 | YPDnc3 | YPDnc4 | EtOHnc1 | EtOHnc2 | Galnc1 | Galnc2 |
| 13 MKK2   | YPL140C | YPDcl2 | YPDcl3 | EtOHcl1 | EtOHcl2 | Galcl1 | YPDnc1 | YPDnc2 | YPDnc3 | YPDnc4 | EtOHnc1 | EtOHnc2 | Galnc1 | Galnc2 |
| 13 ACC1   | YNR016C | YPDcl2 | YPDcl3 | EtOHcl1 | EtOHcl2 | Galcl1 | YPDnc1 | YPDnc2 | YPDnc3 | YPDnc4 | EtOHnc1 | EtOHnc2 | Galnc1 | Galnc2 |
| 13 YCK3   | YER123W | YPDcl2 | YPDcl3 | EtOHcl1 | EtOHcl2 | Galcl1 | YPDnc1 | YPDnc2 | YPDnc3 | YPDnc4 | EtOHnc1 | EtOHnc2 | Galnc1 | Galnc2 |
| 13        | YKL202W | YPDcl2 | YPDcl3 | EtOHcl1 | EtOHcl2 | Galcl1 | YPDnc1 | YPDnc2 | YPDnc3 | YPDnc4 | EtOHnc1 | EtOHnc2 | Galnc1 | Galnc2 |
| 13 LTE1   | YAL024C | YPDcl2 | YPDcl3 | EtOHcl1 | EtOHcl2 | Galcl1 | YPDnc1 | YPDnc2 | YPDnc3 | YPDnc4 | EtOHnc1 | EtOHnc2 | Galnc1 | Galnc2 |
| 13        | YDR396W | YPDcl2 | YPDcl3 | EtOHcl1 | EtOHcl2 | Galcl1 | YPDnc1 | YPDnc2 | YPDnc3 | YPDnc4 | EtOHnc1 | EtOHnc2 | Galnc1 | Galnc2 |
| 13 ARO3   | YDR035W | YPDcl2 | YPDcl3 | EtOHcl1 | EtOHcl2 | Galcl1 | YPDnc1 | YPDnc2 | YPDnc3 | YPDnc4 | EtOHnc1 | EtOHnc2 | Galnc1 | Galnc2 |
| 13        | YBL062W | YPDcl2 | YPDcl3 | EtOHcl1 | EtOHcl2 | Galcl1 | YPDnc1 | YPDnc2 | YPDnc3 | YPDnc4 | EtOHnc1 | EtOHnc2 | Galnc1 | Galnc2 |
| 13 PEX18  | YHR160C | YPDcl2 | YPDcl3 | EtOHcl1 | EtOHcl2 | Galcl1 | YPDnc1 | YPDnc2 | YPDnc3 | YPDnc4 | EtOHnc1 | EtOHnc2 | Galnc1 | Galnc2 |
| 13 TFC4   | YGR047C | YPDcl2 | YPDcl3 | EtOHcl1 | EtOHcl2 | Galcl1 | YPDnc1 | YPDnc2 | YPDnc3 | YPDnc4 | EtOHnc1 | EtOHnc2 | Galnc1 | Galnc2 |
| 13 UBP3   | YER151C | YPDcl2 | YPDcl3 | EtOHcl1 | EtOHcl2 | Galcl1 | YPDnc1 | YPDnc2 | YPDnc3 | YPDnc4 | EtOHnc1 | EtOHnc2 | Galnc1 | Galnc2 |
| 13 DUR1,2 | YBR208C | YPDcl2 | YPDcl3 | EtOHcl1 | EtOHcl2 | Galcl1 | YPDnc1 | YPDnc2 | YPDnc3 | YPDnc4 | EtOHnc1 | EtOHnc2 | Galnc1 | Galnc2 |
| 13 XYL2   | YLR070C | YPDcl2 | YPDcl3 | EtOHcl1 | EtOHcl2 | Galcl1 | YPDnc1 | YPDnc2 | YPDnc3 | YPDnc4 | EtOHnc1 | EtOHnc2 | Galnc1 | Galnc2 |
| 13 RPC82  | YPR190C | YPDcl2 | YPDcl3 | EtOHcl1 | EtOHcl2 | Galcl1 | YPDnc1 | YPDnc2 | YPDnc3 | YPDnc4 | EtOHnc1 | EtOHnc2 | Galnc1 | Galnc2 |

|          |           |        |        |         |         |        |        |        |        |        |         |         |        |        |
|----------|-----------|--------|--------|---------|---------|--------|--------|--------|--------|--------|---------|---------|--------|--------|
| 13 BUD9  | YGR041W   | YPDcl2 | YPDcl3 | EtOHcl1 | EtOHcl2 | Galcl1 | YPDnc1 | YPDnc2 | YPDnc3 | YPDnc4 | EtOHnc1 | EtOHnc2 | Galnc1 | Galnc2 |
| 13       | YHR097C   | YPDcl2 | YPDcl3 | EtOHcl1 | EtOHcl2 | Galcl1 | YPDnc1 | YPDnc2 | YPDnc3 | YPDnc4 | EtOHnc1 | EtOHnc2 | Galnc1 | Galnc2 |
| 13 TRR1  | YDR353W   | YPDcl2 | YPDcl3 | EtOHcl1 | EtOHcl2 | Galcl1 | YPDnc1 | YPDnc2 | YPDnc3 | YPDnc4 | EtOHnc1 | EtOHnc2 | Galnc1 | Galnc2 |
| 13 SGF11 | YPL047W   | YPDcl2 | YPDcl3 | EtOHcl1 | EtOHcl2 | Galcl1 | YPDnc1 | YPDnc2 | YPDnc3 | YPDnc4 | EtOHnc1 | EtOHnc2 | Galnc1 | Galnc2 |
| 13 ATR1  | YML116W   | YPDcl2 | YPDcl3 | EtOHcl1 | EtOHcl2 | Galcl1 | YPDnc1 | YPDnc2 | YPDnc3 | YPDnc4 | EtOHnc1 | EtOHnc2 | Galnc1 | Galnc2 |
| 13 BSC6  | YOL137W   | YPDcl2 | YPDcl3 | EtOHcl1 | EtOHcl2 | Galcl1 | YPDnc1 | YPDnc2 | YPDnc3 | YPDnc4 | EtOHnc1 | EtOHnc2 | Galnc1 | Galnc2 |
| 13 CDC43 | YGL155W   | YPDcl2 | YPDcl3 | EtOHcl1 | EtOHcl2 | Galcl1 | YPDnc1 | YPDnc2 | YPDnc3 | YPDnc4 | EtOHnc1 | EtOHnc2 | Galnc1 | Galnc2 |
| 13 YRA2  | YKL214C   | YPDcl2 | YPDcl3 | EtOHcl1 | EtOHcl2 | Galcl1 | YPDnc1 | YPDnc2 | YPDnc3 | YPDnc4 | EtOHnc1 | EtOHnc2 | Galnc1 | Galnc2 |
| 13 CCE1  | YKL011C   | YPDcl2 | YPDcl3 | EtOHcl1 | EtOHcl2 | Galcl1 | YPDnc1 | YPDnc2 | YPDnc3 | YPDnc4 | EtOHnc1 | EtOHnc2 | Galnc1 | Galnc2 |
| 13 KOG1  | YHR186C   | YPDcl2 | YPDcl3 | EtOHcl1 | EtOHcl2 | Galcl1 | YPDnc1 | YPDnc2 | YPDnc3 | YPDnc4 | EtOHnc1 | EtOHnc2 | Galnc1 | Galnc2 |
| 13 BUD4  | YJR092W   | YPDcl2 | YPDcl3 | EtOHcl1 | EtOHcl2 | Galcl1 | YPDnc1 | YPDnc2 | YPDnc3 | YPDnc4 | EtOHnc1 | EtOHnc2 | Galnc1 | Galnc2 |
| 13       | YGL199C   | YPDcl2 | YPDcl3 | EtOHcl1 | EtOHcl2 | Galcl1 | YPDnc1 | YPDnc2 | YPDnc3 | YPDnc4 | EtOHnc1 | EtOHnc2 | Galnc1 | Galnc2 |
| 13       | YDR010C   | YPDcl2 | YPDcl3 | EtOHcl1 | EtOHcl2 | Galcl1 | YPDnc1 | YPDnc2 | YPDnc3 | YPDnc4 | EtOHnc1 | EtOHnc2 | Galnc1 | Galnc2 |
| 13 COA2  | YPL189C-A | YPDcl2 | YPDcl3 | EtOHcl1 | EtOHcl2 | Galcl1 | YPDnc1 | YPDnc2 | YPDnc3 | YPDnc4 | EtOHnc1 | EtOHnc2 | Galnc1 | Galnc2 |
| 13 CTP1  | YBR291C   | YPDcl2 | YPDcl3 | EtOHcl1 | EtOHcl2 | Galcl1 | YPDnc1 | YPDnc2 | YPDnc3 | YPDnc4 | EtOHnc1 | EtOHnc2 | Galnc1 | Galnc2 |
| 13       | YBL059W   | YPDcl2 | YPDcl3 | EtOHcl1 | EtOHcl2 | Galcl1 | YPDnc1 | YPDnc2 | YPDnc3 | YPDnc4 | EtOHnc1 | EtOHnc2 | Galnc1 | Galnc2 |
| 13 BOS1  | YLR078C   | YPDcl2 | YPDcl3 | EtOHcl1 | EtOHcl2 | Galcl1 | YPDnc1 | YPDnc2 | YPDnc3 | YPDnc4 | EtOHnc1 | EtOHnc2 | Galnc1 | Galnc2 |
| 13       | YFL012W   | YPDcl2 | YPDcl3 | EtOHcl1 | EtOHcl2 | Galcl1 | YPDnc1 | YPDnc2 | YPDnc3 | YPDnc4 | EtOHnc1 | EtOHnc2 | Galnc1 | Galnc2 |
| 13       | YOR108C-A | YPDcl2 | YPDcl3 | EtOHcl1 | EtOHcl2 | Galcl1 | YPDnc1 | YPDnc2 | YPDnc3 | YPDnc4 | EtOHnc1 | EtOHnc2 | Galnc1 | Galnc2 |
| 13       | YKL153W   | YPDcl2 | YPDcl3 | EtOHcl1 | EtOHcl2 | Galcl1 | YPDnc1 | YPDnc2 | YPDnc3 | YPDnc4 | EtOHnc1 | EtOHnc2 | Galnc1 | Galnc2 |
| 13 MRPL9 | YGR220C   | YPDcl2 | YPDcl3 | EtOHcl1 | EtOHcl2 | Galcl1 | YPDnc1 | YPDnc2 | YPDnc3 | YPDnc4 | EtOHnc1 | EtOHnc2 | Galnc1 | Galnc2 |
| 13 HLJ1  | YMR161W   | YPDcl2 | YPDcl3 | EtOHcl1 | EtOHcl2 | Galcl1 | YPDnc1 | YPDnc2 | YPDnc3 | YPDnc4 | EtOHnc1 | EtOHnc2 | Galnc1 | Galnc2 |
| 13 TIR1  | YER011W   | YPDcl2 | YPDcl3 | EtOHcl1 | EtOHcl2 | Galcl1 | YPDnc1 | YPDnc2 | YPDnc3 | YPDnc4 | EtOHnc1 | EtOHnc2 | Galnc1 | Galnc2 |
| 13 SUT1  | YGL162W   | YPDcl2 | YPDcl3 | EtOHcl1 | EtOHcl2 | Galcl1 | YPDnc1 | YPDnc2 | YPDnc3 | YPDnc4 | EtOHnc1 | EtOHnc2 | Galnc1 | Galnc2 |
| 13 SLA2  | YNL243W   | YPDcl2 | YPDcl3 | EtOHcl1 | EtOHcl2 | Galcl1 | YPDnc1 | YPDnc2 | YPDnc3 | YPDnc4 | EtOHnc1 | EtOHnc2 | Galnc1 | Galnc2 |
| 13 ARC40 | YBR234C   | YPDcl2 | YPDcl3 | EtOHcl1 | EtOHcl2 | Galcl1 | YPDnc1 | YPDnc2 | YPDnc3 | YPDnc4 | EtOHnc1 | EtOHnc2 | Galnc1 | Galnc2 |
| 13 SLM2  | YNL047C   | YPDcl2 | YPDcl3 | EtOHcl1 | EtOHcl2 | Galcl1 | YPDnc1 | YPDnc2 | YPDnc3 | YPDnc4 | EtOHnc1 | EtOHnc2 | Galnc1 | Galnc2 |
| 13 DAK2  | YFL053W   | YPDcl2 | YPDcl3 | EtOHcl1 | EtOHcl2 | Galcl1 | YPDnc1 | YPDnc2 | YPDnc3 | YPDnc4 | EtOHnc1 | EtOHnc2 | Galnc1 | Galnc2 |
| 13       | YOR200W   | YPDcl2 | YPDcl3 | EtOHcl1 | EtOHcl2 | Galcl1 | YPDnc1 | YPDnc2 | YPDnc3 | YPDnc4 | EtOHnc1 | EtOHnc2 | Galnc1 | Galnc2 |
| 13 UTP30 | YKR060W   | YPDcl2 | YPDcl3 | EtOHcl1 | EtOHcl2 | Galcl1 | YPDnc1 | YPDnc2 | YPDnc3 | YPDnc4 | EtOHnc1 | EtOHnc2 | Galnc1 | Galnc2 |
| 13 ARR2  | YPR200C   | YPDcl2 | YPDcl3 | EtOHcl1 | EtOHcl2 | Galcl1 | YPDnc1 | YPDnc2 | YPDnc3 | YPDnc4 | EtOHnc1 | EtOHnc2 | Galnc1 | Galnc2 |
| 13 EST2  | YLR318W   | YPDcl2 | YPDcl3 | EtOHcl1 | EtOHcl2 | Galcl1 | YPDnc1 | YPDnc2 | YPDnc3 | YPDnc4 | EtOHnc1 | EtOHnc2 | Galnc1 | Galnc2 |
| 13 PEX28 | YHR150W   | YPDcl2 | YPDcl3 | EtOHcl1 | EtOHcl2 | Galcl1 | YPDnc1 | YPDnc2 | YPDnc3 | YPDnc4 | EtOHnc1 | EtOHnc2 | Galnc1 | Galnc2 |
| 13 CDC4  | YFL009W   | YPDcl2 | YPDcl3 | EtOHcl1 | EtOHcl2 | Galcl1 | YPDnc1 | YPDnc2 | YPDnc3 | YPDnc4 | EtOHnc1 | EtOHnc2 | Galnc1 | Galnc2 |

|    |       |          |        |        |         |         |        |        |        |        |        |         |         |        |        |
|----|-------|----------|--------|--------|---------|---------|--------|--------|--------|--------|--------|---------|---------|--------|--------|
| 13 | GIP1  | YBR045C  | YPDcl2 | YPDcl3 | EtOHcl1 | EtOHcl2 | Galcl1 | YPDnc1 | YPDnc2 | YPDnc3 | YPDnc4 | EtOHnc1 | EtOHnc2 | Galnc1 | Galnc2 |
| 13 | MIA40 | YKL195W  | YPDcl2 | YPDcl3 | EtOHcl1 | EtOHcl2 | Galcl1 | YPDnc1 | YPDnc2 | YPDnc3 | YPDnc4 | EtOHnc1 | EtOHnc2 | Galnc1 | Galnc2 |
| 13 |       | YPR127W  | YPDcl2 | YPDcl3 | EtOHcl1 | EtOHcl2 | Galcl1 | YPDnc1 | YPDnc2 | YPDnc3 | YPDnc4 | EtOHnc1 | EtOHnc2 | Galnc1 | Galnc2 |
| 13 | RAD9  | YDR217C  | YPDcl2 | YPDcl3 | EtOHcl1 | EtOHcl2 | Galcl1 | YPDnc1 | YPDnc2 | YPDnc3 | YPDnc4 | EtOHnc1 | EtOHnc2 | Galnc1 | Galnc2 |
| 13 | TAF11 | YML015C  | YPDcl2 | YPDcl3 | EtOHcl1 | EtOHcl2 | Galcl1 | YPDnc1 | YPDnc2 | YPDnc3 | YPDnc4 | EtOHnc1 | EtOHnc2 | Galnc1 | Galnc2 |
| 13 | VPS70 | YJR126C  | YPDcl2 | YPDcl3 | EtOHcl1 | EtOHcl2 | Galcl1 | YPDnc1 | YPDnc2 | YPDnc3 | YPDnc4 | EtOHnc1 | EtOHnc2 | Galnc1 | Galnc2 |
| 13 | RCE1  | YMR274C  | YPDcl2 | YPDcl3 | EtOHcl1 | EtOHcl2 | Galcl1 | YPDnc1 | YPDnc2 | YPDnc3 | YPDnc4 | EtOHnc1 | EtOHnc2 | Galnc1 | Galnc2 |
| 13 | PLB1  | YMR008C  | YPDcl2 | YPDcl3 | EtOHcl1 | EtOHcl2 | Galcl1 | YPDnc1 | YPDnc2 | YPDnc3 | YPDnc4 | EtOHnc1 | EtOHnc2 | Galnc1 | Galnc2 |
| 13 |       | YHR125W  | YPDcl2 | YPDcl3 | EtOHcl1 | EtOHcl2 | Galcl1 | YPDnc1 | YPDnc2 | YPDnc3 | YPDnc4 | EtOHnc1 | EtOHnc2 | Galnc1 | Galnc2 |
| 13 | HO    | YDL227C  | YPDcl2 | YPDcl3 | EtOHcl1 | EtOHcl2 | Galcl1 | YPDnc1 | YPDnc2 | YPDnc3 | YPDnc4 | EtOHnc1 | EtOHnc2 | Galnc1 | Galnc2 |
| 13 | SWS2  | YNL081C  | YPDcl2 | YPDcl3 | EtOHcl1 | EtOHcl2 | Galcl1 | YPDnc1 | YPDnc2 | YPDnc3 | YPDnc4 | EtOHnc1 | EtOHnc2 | Galnc1 | Galnc2 |
| 13 |       | YDR532C  | YPDcl2 | YPDcl3 | EtOHcl1 | EtOHcl2 | Galcl1 | YPDnc1 | YPDnc2 | YPDnc3 | YPDnc4 | EtOHnc1 | EtOHnc2 | Galnc1 | Galnc2 |
| 13 |       | YNL319W  | YPDcl2 | YPDcl3 | EtOHcl1 | EtOHcl2 | Galcl1 | YPDnc1 | YPDnc2 | YPDnc3 | YPDnc4 | EtOHnc1 | EtOHnc2 | Galnc1 | Galnc2 |
| 13 |       | YBR113W  | YPDcl2 | YPDcl3 | EtOHcl1 | EtOHcl2 | Galcl1 | YPDnc1 | YPDnc2 | YPDnc3 | YPDnc4 | EtOHnc1 | EtOHnc2 | Galnc1 | Galnc2 |
| 13 |       | YJL043W  | YPDcl2 | YPDcl3 | EtOHcl1 | EtOHcl2 | Galcl1 | YPDnc1 | YPDnc2 | YPDnc3 | YPDnc4 | EtOHnc1 | EtOHnc2 | Galnc1 | Galnc2 |
| 13 | ALG13 | YGL047W  | YPDcl2 | YPDcl3 | EtOHcl1 | EtOHcl2 | Galcl1 | YPDnc1 | YPDnc2 | YPDnc3 | YPDnc4 | EtOHnc1 | EtOHnc2 | Galnc1 | Galnc2 |
| 13 | SSK1  | YLR006C  | YPDcl2 | YPDcl3 | EtOHcl1 | EtOHcl2 | Galcl1 | YPDnc1 | YPDnc2 | YPDnc3 | YPDnc4 | EtOHnc1 | EtOHnc2 | Galnc1 | Galnc2 |
| 13 | OCA5  | YHL029C  | YPDcl2 | YPDcl3 | EtOHcl1 | EtOHcl2 | Galcl1 | YPDnc1 | YPDnc2 | YPDnc3 | YPDnc4 | EtOHnc1 | EtOHnc2 | Galnc1 | Galnc2 |
| 13 | PRI1  | YIR008C  | YPDcl2 | YPDcl3 | EtOHcl1 | EtOHcl2 | Galcl1 | YPDnc1 | YPDnc2 | YPDnc3 | YPDnc4 | EtOHnc1 | EtOHnc2 | Galnc1 | Galnc2 |
| 13 |       | YBL006W- | YPDcl2 | YPDcl3 | EtOHcl1 | EtOHcl2 | Galcl1 | YPDnc1 | YPDnc2 | YPDnc3 | YPDnc4 | EtOHnc1 | EtOHnc2 | Galnc1 | Galnc2 |
| 13 | NCL1  | YBL024W  | YPDcl2 | YPDcl3 | EtOHcl1 | EtOHcl2 | Galcl1 | YPDnc1 | YPDnc2 | YPDnc3 | YPDnc4 | EtOHnc1 | EtOHnc2 | Galnc1 | Galnc2 |
| 13 | HIM1  | YDR317W  | YPDcl2 | YPDcl3 | EtOHcl1 | EtOHcl2 | Galcl1 | YPDnc1 | YPDnc2 | YPDnc3 | YPDnc4 | EtOHnc1 | EtOHnc2 | Galnc1 | Galnc2 |
| 13 | LOH1  | YJL038C  | YPDcl2 | YPDcl3 | EtOHcl1 | EtOHcl2 | Galcl1 | YPDnc1 | YPDnc2 | YPDnc3 | YPDnc4 | EtOHnc1 | EtOHnc2 | Galnc1 | Galnc2 |
| 13 | NRG1  | YDR043C  | YPDcl2 | YPDcl3 | EtOHcl1 | EtOHcl2 | Galcl1 | YPDnc1 | YPDnc2 | YPDnc3 | YPDnc4 | EtOHnc1 | EtOHnc2 | Galnc1 | Galnc2 |
| 13 | RPA43 | YOR340C  | YPDcl2 | YPDcl3 | EtOHcl1 | EtOHcl2 | Galcl1 | YPDnc1 | YPDnc2 | YPDnc3 | YPDnc4 | EtOHnc1 | EtOHnc2 | Galnc1 | Galnc2 |
| 13 | MGR1  | YCL044C  | YPDcl2 | YPDcl3 | EtOHcl1 | EtOHcl2 | Galcl1 | YPDnc1 | YPDnc2 | YPDnc3 | YPDnc4 | EtOHnc1 | EtOHnc2 | Galnc1 | Galnc2 |
| 13 | ROG3  | YFR022W  | YPDcl2 | YPDcl3 | EtOHcl1 | EtOHcl2 | Galcl1 | YPDnc1 | YPDnc2 | YPDnc3 | YPDnc4 | EtOHnc1 | EtOHnc2 | Galnc1 | Galnc2 |
| 13 | RMD6  | YEL072W  | YPDcl2 | YPDcl3 | EtOHcl1 | EtOHcl2 | Galcl1 | YPDnc1 | YPDnc2 | YPDnc3 | YPDnc4 | EtOHnc1 | EtOHnc2 | Galnc1 | Galnc2 |
| 13 | DSN1  | YIR010W  | YPDcl2 | YPDcl3 | EtOHcl1 | EtOHcl2 | Galcl1 | YPDnc1 | YPDnc2 | YPDnc3 | YPDnc4 | EtOHnc1 | EtOHnc2 | Galnc1 | Galnc2 |
| 13 | HIR1  | YBL008W  | YPDcl2 | YPDcl3 | EtOHcl1 | EtOHcl2 | Galcl1 | YPDnc1 | YPDnc2 | YPDnc3 | YPDnc4 | EtOHnc1 | EtOHnc2 | Galnc1 | Galnc2 |
| 13 |       | YMR178W  | YPDcl2 | YPDcl3 | EtOHcl1 | EtOHcl2 | Galcl1 | YPDnc1 | YPDnc2 | YPDnc3 | YPDnc4 | EtOHnc1 | EtOHnc2 | Galnc1 | Galnc2 |
| 13 | YSC83 | YHR017W  | YPDcl2 | YPDcl3 | EtOHcl1 | EtOHcl2 | Galcl1 | YPDnc1 | YPDnc2 | YPDnc3 | YPDnc4 | EtOHnc1 | EtOHnc2 | Galnc1 | Galnc2 |
| 13 | SNO1  | YMR095C  | YPDcl2 | YPDcl3 | EtOHcl1 | EtOHcl2 | Galcl1 | YPDnc1 | YPDnc2 | YPDnc3 | YPDnc4 | EtOHnc1 | EtOHnc2 | Galnc1 | Galnc2 |
| 13 | SIR1  | YKR101W  | YPDcl2 | YPDcl3 | EtOHcl1 | EtOHcl2 | Galcl1 | YPDnc1 | YPDnc2 | YPDnc3 | YPDnc4 | EtOHnc1 | EtOHnc2 | Galnc1 | Galnc2 |

|           |           |        |        |         |         |        |        |        |        |        |         |         |        |        |
|-----------|-----------|--------|--------|---------|---------|--------|--------|--------|--------|--------|---------|---------|--------|--------|
| 13 AIM18  | YHR198C   | YPDcl2 | YPDcl3 | EtOHcl1 | EtOHcl2 | Galcl1 | YPDnc1 | YPDnc2 | YPDnc3 | YPDnc4 | EtOHnc1 | EtOHnc2 | Galnc1 | Galnc2 |
| 13 SKI7   | YOR076C   | YPDcl2 | YPDcl3 | EtOHcl1 | EtOHcl2 | Galcl1 | YPDnc1 | YPDnc2 | YPDnc3 | YPDnc4 | EtOHnc1 | EtOHnc2 | Galnc1 | Galnc2 |
| 13 ALG9   | YNL219C   | YPDcl2 | YPDcl3 | EtOHcl1 | EtOHcl2 | Galcl1 | YPDnc1 | YPDnc2 | YPDnc3 | YPDnc4 | EtOHnc1 | EtOHnc2 | Galnc1 | Galnc2 |
| 13 CAP2   | YIL034C   | YPDcl2 | YPDcl3 | EtOHcl1 | EtOHcl2 | Galcl1 | YPDnc1 | YPDnc2 | YPDnc3 | YPDnc4 | EtOHnc1 | EtOHnc2 | Galnc1 | Galnc2 |
| 13        | YOR342C   | YPDcl2 | YPDcl3 | EtOHcl1 | EtOHcl2 | Galcl1 | YPDnc1 | YPDnc2 | YPDnc3 | YPDnc4 | EtOHnc1 | EtOHnc2 | Galnc1 | Galnc2 |
| 13 NBA1   | YOL070C   | YPDcl2 | YPDcl3 | EtOHcl1 | EtOHcl2 | Galcl1 | YPDnc1 | YPDnc2 | YPDnc3 | YPDnc4 | EtOHnc1 | EtOHnc2 | Galnc1 | Galnc2 |
| 13        | YLR124W   | YPDcl2 | YPDcl3 | EtOHcl1 | EtOHcl2 | Galcl1 | YPDnc1 | YPDnc2 | YPDnc3 | YPDnc4 | EtOHnc1 | EtOHnc2 | Galnc1 | Galnc2 |
| 13 CBR1   | YIL043C   | YPDcl2 | YPDcl3 | EtOHcl1 | EtOHcl2 | Galcl1 | YPDnc1 | YPDnc2 | YPDnc3 | YPDnc4 | EtOHnc1 | EtOHnc2 | Galnc1 | Galnc2 |
| 13 DHH1   | YDL160C   | YPDcl2 | YPDcl3 | EtOHcl1 | EtOHcl2 | Galcl1 | YPDnc1 | YPDnc2 | YPDnc3 | YPDnc4 | EtOHnc1 | EtOHnc2 | Galnc1 | Galnc2 |
| 13 PHB2   | YGR231C   | YPDcl2 | YPDcl3 | EtOHcl1 | EtOHcl2 | Galcl1 | YPDnc1 | YPDnc2 | YPDnc3 | YPDnc4 | EtOHnc1 | EtOHnc2 | Galnc1 | Galnc2 |
| 13 HDA1   | YNL021W   | YPDcl2 | YPDcl3 | EtOHcl1 | EtOHcl2 | Galcl1 | YPDnc1 | YPDnc2 | YPDnc3 | YPDnc4 | EtOHnc1 | EtOHnc2 | Galnc1 | Galnc2 |
| 13 RSN1   | YMR266W   | YPDcl2 | YPDcl3 | EtOHcl1 | EtOHcl2 | Galcl1 | YPDnc1 | YPDnc2 | YPDnc3 | YPDnc4 | EtOHnc1 | EtOHnc2 | Galnc1 | Galnc2 |
| 13 CTT1   | YGR088W   | YPDcl2 | YPDcl3 | EtOHcl1 | EtOHcl2 | Galcl1 | YPDnc1 | YPDnc2 | YPDnc3 | YPDnc4 | EtOHnc1 | EtOHnc2 | Galnc1 | Galnc2 |
| 13 BUD31  | YCR063W   | YPDcl2 | YPDcl3 | EtOHcl1 | EtOHcl2 | Galcl1 | YPDnc1 | YPDnc2 | YPDnc3 | YPDnc4 | EtOHnc1 | EtOHnc2 | Galnc1 | Galnc2 |
| 13        | YHR073W-  | YPDcl2 | YPDcl3 | EtOHcl1 | EtOHcl2 | Galcl1 | YPDnc1 | YPDnc2 | YPDnc3 | YPDnc4 | EtOHnc1 | EtOHnc2 | Galnc1 | Galnc2 |
| 13        | YBR201C-A | YPDcl2 | YPDcl3 | EtOHcl1 | EtOHcl2 | Galcl1 | YPDnc1 | YPDnc2 | YPDnc3 | YPDnc4 | EtOHnc1 | EtOHnc2 | Galnc1 | Galnc2 |
| 13 OCA2   | YNL056W   | YPDcl2 | YPDcl3 | EtOHcl1 | EtOHcl2 | Galcl1 | YPDnc1 | YPDnc2 | YPDnc3 | YPDnc4 | EtOHnc1 | EtOHnc2 | Galnc1 | Galnc2 |
| 13 ATS1   | YAL020C   | YPDcl2 | YPDcl3 | EtOHcl1 | EtOHcl2 | Galcl1 | YPDnc1 | YPDnc2 | YPDnc3 | YPDnc4 | EtOHnc1 | EtOHnc2 | Galnc1 | Galnc2 |
| 13 MDS3   | YGL197W   | YPDcl2 | YPDcl3 | EtOHcl1 | EtOHcl2 | Galcl1 | YPDnc1 | YPDnc2 | YPDnc3 | YPDnc4 | EtOHnc1 | EtOHnc2 | Galnc1 | Galnc2 |
| 13 SOF1   | YLL011W   | YPDcl2 | YPDcl3 | EtOHcl1 | EtOHcl2 | Galcl1 | YPDnc1 | YPDnc2 | YPDnc3 | YPDnc4 | EtOHnc1 | EtOHnc2 | Galnc1 | Galnc2 |
| 13 AIF1   | YNR074C   | YPDcl2 | YPDcl3 | EtOHcl1 | EtOHcl2 | Galcl1 | YPDnc1 | YPDnc2 | YPDnc3 | YPDnc4 | EtOHnc1 | EtOHnc2 | Galnc1 | Galnc2 |
| 13 PDS1   | YDR113C   | YPDcl2 | YPDcl3 | EtOHcl1 | EtOHcl2 | Galcl1 | YPDnc1 | YPDnc2 | YPDnc3 | YPDnc4 | EtOHnc1 | EtOHnc2 | Galnc1 | Galnc2 |
| 13 RAD52  | YML032C   | YPDcl2 | YPDcl3 | EtOHcl1 | EtOHcl2 | Galcl1 | YPDnc1 | YPDnc2 | YPDnc3 | YPDnc4 | EtOHnc1 | EtOHnc2 | Galnc1 | Galnc2 |
| 13 CAF16  | YFL028C   | YPDcl2 | YPDcl3 | EtOHcl1 | EtOHcl2 | Galcl1 | YPDnc1 | YPDnc2 | YPDnc3 | YPDnc4 | EtOHnc1 | EtOHnc2 | Galnc1 | Galnc2 |
| 13 RIB5   | YBR256C   | YPDcl2 | YPDcl3 | EtOHcl1 | EtOHcl2 | Galcl1 | YPDnc1 | YPDnc2 | YPDnc3 | YPDnc4 | EtOHnc1 | EtOHnc2 | Galnc1 | Galnc2 |
| 13 RMI1   | YPL024W   | YPDcl2 | YPDcl3 | EtOHcl1 | EtOHcl2 | Galcl1 | YPDnc1 | YPDnc2 | YPDnc3 | YPDnc4 | EtOHnc1 | EtOHnc2 | Galnc1 | Galnc2 |
| 13 SIR3   | YLR442C   | YPDcl2 | YPDcl3 | EtOHcl1 | EtOHcl2 | Galcl1 | YPDnc1 | YPDnc2 | YPDnc3 | YPDnc4 | EtOHnc1 | EtOHnc2 | Galnc1 | Galnc2 |
| 13 PET111 | YMR257C   | YPDcl2 | YPDcl3 | EtOHcl1 | EtOHcl2 | Galcl1 | YPDnc1 | YPDnc2 | YPDnc3 | YPDnc4 | EtOHnc1 | EtOHnc2 | Galnc1 | Galnc2 |
| 13 SRP21  | YKL122C   | YPDcl2 | YPDcl3 | EtOHcl1 | EtOHcl2 | Galcl1 | YPDnc1 | YPDnc2 | YPDnc3 | YPDnc4 | EtOHnc1 | EtOHnc2 | Galnc1 | Galnc2 |
| 13 THI3   | YDL080C   | YPDcl2 | YPDcl3 | EtOHcl1 | EtOHcl2 | Galcl1 | YPDnc1 | YPDnc2 | YPDnc3 | YPDnc4 | EtOHnc1 | EtOHnc2 | Galnc1 | Galnc2 |
| 13 IRC22  | YEL001C   | YPDcl2 | YPDcl3 | EtOHcl1 | EtOHcl2 | Galcl1 | YPDnc1 | YPDnc2 | YPDnc3 | YPDnc4 | EtOHnc1 | EtOHnc2 | Galnc1 | Galnc2 |
| 13 NUT2   | YPR168W   | YPDcl2 | YPDcl3 | EtOHcl1 | EtOHcl2 | Galcl1 | YPDnc1 | YPDnc2 | YPDnc3 | YPDnc4 | EtOHnc1 | EtOHnc2 | Galnc1 | Galnc2 |
| 13        | YLR374C   | YPDcl2 | YPDcl3 | EtOHcl1 | EtOHcl2 | Galcl1 | YPDnc1 | YPDnc2 | YPDnc3 | YPDnc4 | EtOHnc1 | EtOHnc2 | Galnc1 | Galnc2 |
| 13 CTM1   | YHR109W   | YPDcl2 | YPDcl3 | EtOHcl1 | EtOHcl2 | Galcl1 | YPDnc1 | YPDnc2 | YPDnc3 | YPDnc4 | EtOHnc1 | EtOHnc2 | Galnc1 | Galnc2 |

|           |           |        |        |         |         |        |        |        |        |        |         |         |        |        |
|-----------|-----------|--------|--------|---------|---------|--------|--------|--------|--------|--------|---------|---------|--------|--------|
| 13        | YDL034W   | YPDcl2 | YPDcl3 | EtOHcl1 | EtOHcl2 | Galcl1 | YPDnc1 | YPDnc2 | YPDnc3 | YPDnc4 | EtOHnc1 | EtOHnc2 | Galnc1 | Galnc2 |
| 13 FCY1   | YPR062W   | YPDcl2 | YPDcl3 | EtOHcl1 | EtOHcl2 | Galcl1 | YPDnc1 | YPDnc2 | YPDnc3 | YPDnc4 | EtOHnc1 | EtOHnc2 | Galnc1 | Galnc2 |
| 13 VPS34  | YLR240W   | YPDcl2 | YPDcl3 | EtOHcl1 | EtOHcl2 | Galcl1 | YPDnc1 | YPDnc2 | YPDnc3 | YPDnc4 | EtOHnc1 | EtOHnc2 | Galnc1 | Galnc2 |
| 13 SRB5   | YGR104C   | YPDcl2 | YPDcl3 | EtOHcl1 | EtOHcl2 | Galcl1 | YPDnc1 | YPDnc2 | YPDnc3 | YPDnc4 | EtOHnc1 | EtOHnc2 | Galnc1 | Galnc2 |
| 13 DAN2   | YLR037C   | YPDcl2 | YPDcl3 | EtOHcl1 | EtOHcl2 | Galcl1 | YPDnc1 | YPDnc2 | YPDnc3 | YPDnc4 | EtOHnc1 | EtOHnc2 | Galnc1 | Galnc2 |
| 13 DIT2   | YDR402C   | YPDcl2 | YPDcl3 | EtOHcl1 | EtOHcl2 | Galcl1 | YPDnc1 | YPDnc2 | YPDnc3 | YPDnc4 | EtOHnc1 | EtOHnc2 | Galnc1 | Galnc2 |
| 13 BRR1   | YPR057W   | YPDcl2 | YPDcl3 | EtOHcl1 | EtOHcl2 | Galcl1 | YPDnc1 | YPDnc2 | YPDnc3 | YPDnc4 | EtOHnc1 | EtOHnc2 | Galnc1 | Galnc2 |
| 13 RPL15A | YLR029C   | YPDcl2 | YPDcl3 | EtOHcl1 | EtOHcl2 | Galcl1 | YPDnc1 | YPDnc2 | YPDnc3 | YPDnc4 | EtOHnc1 | EtOHnc2 | Galnc1 | Galnc2 |
| 13        | YMR155W   | YPDcl2 | YPDcl3 | EtOHcl1 | EtOHcl2 | Galcl1 | YPDnc1 | YPDnc2 | YPDnc3 | YPDnc4 | EtOHnc1 | EtOHnc2 | Galnc1 | Galnc2 |
| 13        | YGR164W   | YPDcl2 | YPDcl3 | EtOHcl1 | EtOHcl2 | Galcl1 | YPDnc1 | YPDnc2 | YPDnc3 | YPDnc4 | EtOHnc1 | EtOHnc2 | Galnc1 | Galnc2 |
| 13        | YIL171W-A | YPDcl2 | YPDcl3 | EtOHcl1 | EtOHcl2 | Galcl1 | YPDnc1 | YPDnc2 | YPDnc3 | YPDnc4 | EtOHnc1 | EtOHnc2 | Galnc1 | Galnc2 |
| 13        | YDR114C   | YPDcl2 | YPDcl3 | EtOHcl1 | EtOHcl2 | Galcl1 | YPDnc1 | YPDnc2 | YPDnc3 | YPDnc4 | EtOHnc1 | EtOHnc2 | Galnc1 | Galnc2 |
| 13 AGA1   | YNR044W   | YPDcl2 | YPDcl3 | EtOHcl1 | EtOHcl2 | Galcl1 | YPDnc1 | YPDnc2 | YPDnc3 | YPDnc4 | EtOHnc1 | EtOHnc2 | Galnc1 | Galnc2 |
| 13 SUT2   | YPR009W   | YPDcl2 | YPDcl3 | EtOHcl1 | EtOHcl2 | Galcl1 | YPDnc1 | YPDnc2 | YPDnc3 | YPDnc4 | EtOHnc1 | EtOHnc2 | Galnc1 | Galnc2 |
| 13 TIF35  | YDR429C   | YPDcl2 | YPDcl3 | EtOHcl1 | EtOHcl2 | Galcl1 | YPDnc1 | YPDnc2 | YPDnc3 | YPDnc4 | EtOHnc1 | EtOHnc2 | Galnc1 | Galnc2 |
| 13 SSK2   | YNR031C   | YPDcl2 | YPDcl3 | EtOHcl1 | EtOHcl2 | Galcl1 | YPDnc1 | YPDnc2 | YPDnc3 | YPDnc4 | EtOHnc1 | EtOHnc2 | Galnc1 | Galnc2 |
| 13 STE12  | YHR084W   | YPDcl2 | YPDcl3 | EtOHcl1 | EtOHcl2 | Galcl1 | YPDnc1 | YPDnc2 | YPDnc3 | YPDnc4 | EtOHnc1 | EtOHnc2 | Galnc1 | Galnc2 |
| 13 UTP23  | YOR004W   | YPDcl2 | YPDcl3 | EtOHcl1 | EtOHcl2 | Galcl1 | YPDnc1 | YPDnc2 | YPDnc3 | YPDnc4 | EtOHnc1 | EtOHnc2 | Galnc1 | Galnc2 |
| 13 TRI1   | YMR233W   | YPDcl2 | YPDcl3 | EtOHcl1 | EtOHcl2 | Galcl1 | YPDnc1 | YPDnc2 | YPDnc3 | YPDnc4 | EtOHnc1 | EtOHnc2 | Galnc1 | Galnc2 |
| 13 PSR1   | YLL010C   | YPDcl2 | YPDcl3 | EtOHcl1 | EtOHcl2 | Galcl1 | YPDnc1 | YPDnc2 | YPDnc3 | YPDnc4 | EtOHnc1 | EtOHnc2 | Galnc1 | Galnc2 |
| 13 KAR1   | YNL188W   | YPDcl2 | YPDcl3 | EtOHcl1 | EtOHcl2 | Galcl1 | YPDnc1 | YPDnc2 | YPDnc3 | YPDnc4 | EtOHnc1 | EtOHnc2 | Galnc1 | Galnc2 |
| 13        | YKL156C-A | YPDcl2 | YPDcl3 | EtOHcl1 | EtOHcl2 | Galcl1 | YPDnc1 | YPDnc2 | YPDnc3 | YPDnc4 | EtOHnc1 | EtOHnc2 | Galnc1 | Galnc2 |
| 13 EPS1   | YIL005W   | YPDcl2 | YPDcl3 | EtOHcl1 | EtOHcl2 | Galcl1 | YPDnc1 | YPDnc2 | YPDnc3 | YPDnc4 | EtOHnc1 | EtOHnc2 | Galnc1 | Galnc2 |
| 13 ALG12  | YNR030W   | YPDcl2 | YPDcl3 | EtOHcl1 | EtOHcl2 | Galcl1 | YPDnc1 | YPDnc2 | YPDnc3 | YPDnc4 | EtOHnc1 | EtOHnc2 | Galnc1 | Galnc2 |
| 13 TSC10  | YBR265W   | YPDcl2 | YPDcl3 | EtOHcl1 | EtOHcl2 | Galcl1 | YPDnc1 | YPDnc2 | YPDnc3 | YPDnc4 | EtOHnc1 | EtOHnc2 | Galnc1 | Galnc2 |
| 13 SNT2   | YGL131C   | YPDcl2 | YPDcl3 | EtOHcl1 | EtOHcl2 | Galcl1 | YPDnc1 | YPDnc2 | YPDnc3 | YPDnc4 | EtOHnc1 | EtOHnc2 | Galnc1 | Galnc2 |
| 13        | YDL162C   | YPDcl2 | YPDcl3 | EtOHcl1 | EtOHcl2 | Galcl1 | YPDnc1 | YPDnc2 | YPDnc3 | YPDnc4 | EtOHnc1 | EtOHnc2 | Galnc1 | Galnc2 |
| 13        | YNR040W   | YPDcl2 | YPDcl3 | EtOHcl1 | EtOHcl2 | Galcl1 | YPDnc1 | YPDnc2 | YPDnc3 | YPDnc4 | EtOHnc1 | EtOHnc2 | Galnc1 | Galnc2 |
| 13        | YHR033W   | YPDcl2 | YPDcl3 | EtOHcl1 | EtOHcl2 | Galcl1 | YPDnc1 | YPDnc2 | YPDnc3 | YPDnc4 | EtOHnc1 | EtOHnc2 | Galnc1 | Galnc2 |
| 13        | YHL046W-  | YPDcl2 | YPDcl3 | EtOHcl1 | EtOHcl2 | Galcl1 | YPDnc1 | YPDnc2 | YPDnc3 | YPDnc4 | EtOHnc1 | EtOHnc2 | Galnc1 | Galnc2 |
| 13 FMP43  | YGR243W   | YPDcl2 | YPDcl3 | EtOHcl1 | EtOHcl2 | Galcl1 | YPDnc1 | YPDnc2 | YPDnc3 | YPDnc4 | EtOHnc1 | EtOHnc2 | Galnc1 | Galnc2 |
| 13 SEC1   | YDR164C   | YPDcl2 | YPDcl3 | EtOHcl1 | EtOHcl2 | Galcl1 | YPDnc1 | YPDnc2 | YPDnc3 | YPDnc4 | EtOHnc1 | EtOHnc2 | Galnc1 | Galnc2 |
| 13 RIM21  | YNL294C   | YPDcl2 | YPDcl3 | EtOHcl1 | EtOHcl2 | Galcl1 | YPDnc1 | YPDnc2 | YPDnc3 | YPDnc4 | EtOHnc1 | EtOHnc2 | Galnc1 | Galnc2 |
| 13 EGD2   | YHR193C   | YPDcl2 | YPDcl3 | EtOHcl1 | EtOHcl2 | Galcl1 | YPDnc1 | YPDnc2 | YPDnc3 | YPDnc4 | EtOHnc1 | EtOHnc2 | Galnc1 | Galnc2 |

|          |           |        |        |         |         |        |        |        |        |        |         |         |        |        |
|----------|-----------|--------|--------|---------|---------|--------|--------|--------|--------|--------|---------|---------|--------|--------|
| 13       | YPR147C   | YPDcl2 | YPDcl3 | EtOHcl1 | EtOHcl2 | Galcl1 | YPDnc1 | YPDnc2 | YPDnc3 | YPDnc4 | EtOHnc1 | EtOHnc2 | Galnc1 | Galnc2 |
| 13 PHO3  | YBR092C   | YPDcl2 | YPDcl3 | EtOHcl1 | EtOHcl2 | Galcl1 | YPDnc1 | YPDnc2 | YPDnc3 | YPDnc4 | EtOHnc1 | EtOHnc2 | Galnc1 | Galnc2 |
| 13 SSP2  | YOR242C   | YPDcl2 | YPDcl3 | EtOHcl1 | EtOHcl2 | Galcl1 | YPDnc1 | YPDnc2 | YPDnc3 | YPDnc4 | EtOHnc1 | EtOHnc2 | Galnc1 | Galnc2 |
| 13 FMP25 | YLR077W   | YPDcl2 | YPDcl3 | EtOHcl1 | EtOHcl2 | Galcl1 | YPDnc1 | YPDnc2 | YPDnc3 | YPDnc4 | EtOHnc1 | EtOHnc2 | Galnc1 | Galnc2 |
| 13 SRB8  | YCR081W   | YPDcl2 | YPDcl3 | EtOHcl1 | EtOHcl2 | Galcl1 | YPDnc1 | YPDnc2 | YPDnc3 | YPDnc4 | EtOHnc1 | EtOHnc2 | Galnc1 | Galnc2 |
| 13 SWI3  | YJL176C   | YPDcl2 | YPDcl3 | EtOHcl1 | EtOHcl2 | Galcl1 | YPDnc1 | YPDnc2 | YPDnc3 | YPDnc4 | EtOHnc1 | EtOHnc2 | Galnc1 | Galnc2 |
| 13 FUR1  | YHR128W   | YPDcl2 | YPDcl3 | EtOHcl1 | EtOHcl2 | Galcl1 | YPDnc1 | YPDnc2 | YPDnc3 | YPDnc4 | EtOHnc1 | EtOHnc2 | Galnc1 | Galnc2 |
| 13       | YJR003C   | YPDcl2 | YPDcl3 | EtOHcl1 | EtOHcl2 | Galcl1 | YPDnc1 | YPDnc2 | YPDnc3 | YPDnc4 | EtOHnc1 | EtOHnc2 | Galnc1 | Galnc2 |
| 13       | YPR114W   | YPDcl2 | YPDcl3 | EtOHcl1 | EtOHcl2 | Galcl1 | YPDnc1 | YPDnc2 | YPDnc3 | YPDnc4 | EtOHnc1 | EtOHnc2 | Galnc1 | Galnc2 |
| 13 GUP2  | YPL189W   | YPDcl2 | YPDcl3 | EtOHcl1 | EtOHcl2 | Galcl1 | YPDnc1 | YPDnc2 | YPDnc3 | YPDnc4 | EtOHnc1 | EtOHnc2 | Galnc1 | Galnc2 |
| 13 ZAP1  | YJL056C   | YPDcl2 | YPDcl3 | EtOHcl1 | EtOHcl2 | Galcl1 | YPDnc1 | YPDnc2 | YPDnc3 | YPDnc4 | EtOHnc1 | EtOHnc2 | Galnc1 | Galnc2 |
| 13       | YPL247C   | YPDcl2 | YPDcl3 | EtOHcl1 | EtOHcl2 | Galcl1 | YPDnc1 | YPDnc2 | YPDnc3 | YPDnc4 | EtOHnc1 | EtOHnc2 | Galnc1 | Galnc2 |
| 13 CWC21 | YDR482C   | YPDcl2 | YPDcl3 | EtOHcl1 | EtOHcl2 | Galcl1 | YPDnc1 | YPDnc2 | YPDnc3 | YPDnc4 | EtOHnc1 | EtOHnc2 | Galnc1 | Galnc2 |
| 13 ALB1  | YJL122W   | YPDcl2 | YPDcl3 | EtOHcl1 | EtOHcl2 | Galcl1 | YPDnc1 | YPDnc2 | YPDnc3 | YPDnc4 | EtOHnc1 | EtOHnc2 | Galnc1 | Galnc2 |
| 13 SHP1  | YBL058W   | YPDcl2 | YPDcl3 | EtOHcl1 | EtOHcl2 | Galcl1 | YPDnc1 | YPDnc2 | YPDnc3 | YPDnc4 | EtOHnc1 | EtOHnc2 | Galnc1 | Galnc2 |
| 13       | YER085C   | YPDcl2 | YPDcl3 | EtOHcl1 | EtOHcl2 | Galcl1 | YPDnc1 | YPDnc2 | YPDnc3 | YPDnc4 | EtOHnc1 | EtOHnc2 | Galnc1 | Galnc2 |
| 13 HCM1  | YCR065W   | YPDcl2 | YPDcl3 | EtOHcl1 | EtOHcl2 | Galcl1 | YPDnc1 | YPDnc2 | YPDnc3 | YPDnc4 | EtOHnc1 | EtOHnc2 | Galnc1 | Galnc2 |
| 13 SEC53 | YFL045C   | YPDcl2 | YPDcl3 | EtOHcl1 | EtOHcl2 | Galcl1 | YPDnc1 | YPDnc2 | YPDnc3 | YPDnc4 | EtOHnc1 | EtOHnc2 | Galnc1 | Galnc2 |
| 13       | YPR091C   | YPDcl2 | YPDcl3 | EtOHcl1 | EtOHcl2 | Galcl1 | YPDnc1 | YPDnc2 | YPDnc3 | YPDnc4 | EtOHnc1 | EtOHnc2 | Galnc1 | Galnc2 |
| 13       | YOL083W   | YPDcl2 | YPDcl3 | EtOHcl1 | EtOHcl2 | Galcl1 | YPDnc1 | YPDnc2 | YPDnc3 | YPDnc4 | EtOHnc1 | EtOHnc2 | Galnc1 | Galnc2 |
| 13       | YLR307C-A | YPDcl2 | YPDcl3 | EtOHcl1 | EtOHcl2 | Galcl1 | YPDnc1 | YPDnc2 | YPDnc3 | YPDnc4 | EtOHnc1 | EtOHnc2 | Galnc1 | Galnc2 |
| 13 MET13 | YGL125W   | YPDcl2 | YPDcl3 | EtOHcl1 | EtOHcl2 | Galcl1 | YPDnc1 | YPDnc2 | YPDnc3 | YPDnc4 | EtOHnc1 | EtOHnc2 | Galnc1 | Galnc2 |
| 13 KAE1  | YKR038C   | YPDcl2 | YPDcl3 | EtOHcl1 | EtOHcl2 | Galcl1 | YPDnc1 | YPDnc2 | YPDnc3 | YPDnc4 | EtOHnc1 | EtOHnc2 | Galnc1 | Galnc2 |
| 13 GDH2  | YDL215C   | YPDcl2 | YPDcl3 | EtOHcl1 | EtOHcl2 | Galcl1 | YPDnc1 | YPDnc2 | YPDnc3 | YPDnc4 | EtOHnc1 | EtOHnc2 | Galnc1 | Galnc2 |
| 13 TAL1  | YLR354C   | YPDcl2 | YPDcl3 | EtOHcl1 | EtOHcl2 | Galcl1 | YPDnc1 | YPDnc2 | YPDnc3 | YPDnc4 | EtOHnc1 | EtOHnc2 | Galnc1 | Galnc2 |
| 13       | YCR022C   | YPDcl2 | YPDcl3 | EtOHcl1 | EtOHcl2 | Galcl1 | YPDnc1 | YPDnc2 | YPDnc3 | YPDnc4 | EtOHnc1 | EtOHnc2 | Galnc1 | Galnc2 |
| 13 FAR7  | YFR008W   | YPDcl2 | YPDcl3 | EtOHcl1 | EtOHcl2 | Galcl1 | YPDnc1 | YPDnc2 | YPDnc3 | YPDnc4 | EtOHnc1 | EtOHnc2 | Galnc1 | Galnc2 |
| 13 DPP1  | YDR284C   | YPDcl2 | YPDcl3 | EtOHcl1 | EtOHcl2 | Galcl1 | YPDnc1 | YPDnc2 | YPDnc3 | YPDnc4 | EtOHnc1 | EtOHnc2 | Galnc1 | Galnc2 |
| 13 SFK1  | YKL051W   | YPDcl2 | YPDcl3 | EtOHcl1 | EtOHcl2 | Galcl1 | YPDnc1 | YPDnc2 | YPDnc3 | YPDnc4 | EtOHnc1 | EtOHnc2 | Galnc1 | Galnc2 |
| 13       | YPR174C   | YPDcl2 | YPDcl3 | EtOHcl1 | EtOHcl2 | Galcl1 | YPDnc1 | YPDnc2 | YPDnc3 | YPDnc4 | EtOHnc1 | EtOHnc2 | Galnc1 | Galnc2 |
| 13 NPL6  | YMR091C   | YPDcl2 | YPDcl3 | EtOHcl1 | EtOHcl2 | Galcl1 | YPDnc1 | YPDnc2 | YPDnc3 | YPDnc4 | EtOHnc1 | EtOHnc2 | Galnc1 | Galnc2 |
| 13 IRC2  | YDR112W   | YPDcl2 | YPDcl3 | EtOHcl1 | EtOHcl2 | Galcl1 | YPDnc1 | YPDnc2 | YPDnc3 | YPDnc4 | EtOHnc1 | EtOHnc2 | Galnc1 | Galnc2 |
| 13 LST7  | YGR057C   | YPDcl2 | YPDcl3 | EtOHcl1 | EtOHcl2 | Galcl1 | YPDnc1 | YPDnc2 | YPDnc3 | YPDnc4 | EtOHnc1 | EtOHnc2 | Galnc1 | Galnc2 |
| 13 CDA2  | YLR308W   | YPDcl2 | YPDcl3 | EtOHcl1 | EtOHcl2 | Galcl1 | YPDnc1 | YPDnc2 | YPDnc3 | YPDnc4 | EtOHnc1 | EtOHnc2 | Galnc1 | Galnc2 |



|           |           |        |        |         |         |        |        |        |        |        |         |         |        |        |
|-----------|-----------|--------|--------|---------|---------|--------|--------|--------|--------|--------|---------|---------|--------|--------|
| 13 ECM2   | YBR065C   | YPDcl2 | YPDcl3 | EtOHcl1 | EtOHcl2 | Galcl1 | YPDnc1 | YPDnc2 | YPDnc3 | YPDnc4 | EtOHnc1 | EtOHnc2 | Galnc1 | Galnc2 |
| 13 FAR8   | YMR029C   | YPDcl2 | YPDcl3 | EtOHcl1 | EtOHcl2 | Galcl1 | YPDnc1 | YPDnc2 | YPDnc3 | YPDnc4 | EtOHnc1 | EtOHnc2 | Galnc1 | Galnc2 |
| 13 THI22  | YPR121W   | YPDcl2 | YPDcl3 | EtOHcl1 | EtOHcl2 | Galcl1 | YPDnc1 | YPDnc2 | YPDnc3 | YPDnc4 | EtOHnc1 | EtOHnc2 | Galnc1 | Galnc2 |
| 13 ARI1   | YGL157W   | YPDcl2 | YPDcl3 | EtOHcl1 | EtOHcl2 | Galcl1 | YPDnc1 | YPDnc2 | YPDnc3 | YPDnc4 | EtOHnc1 | EtOHnc2 | Galnc1 | Galnc2 |
| 13        | YMR148W   | YPDcl2 | YPDcl3 | EtOHcl1 | EtOHcl2 | Galcl1 | YPDnc1 | YPDnc2 | YPDnc3 | YPDnc4 | EtOHnc1 | EtOHnc2 | Galnc1 | Galnc2 |
| 13 SML1   | YML058W   | YPDcl2 | YPDcl3 | EtOHcl1 | EtOHcl2 | Galcl1 | YPDnc1 | YPDnc2 | YPDnc3 | YPDnc4 | EtOHnc1 | EtOHnc2 | Galnc1 | Galnc2 |
| 13 UGA1   | YGR019W   | YPDcl2 | YPDcl3 | EtOHcl1 | EtOHcl2 | Galcl1 | YPDnc1 | YPDnc2 | YPDnc3 | YPDnc4 | EtOHnc1 | EtOHnc2 | Galnc1 | Galnc2 |
| 13 SHM1   | YBR263W   | YPDcl2 | YPDcl3 | EtOHcl1 | EtOHcl2 | Galcl1 | YPDnc1 | YPDnc2 | YPDnc3 | YPDnc4 | EtOHnc1 | EtOHnc2 | Galnc1 | Galnc2 |
| 13 APC5   | YOR249C   | YPDcl2 | YPDcl3 | EtOHcl1 | EtOHcl2 | Galcl1 | YPDnc1 | YPDnc2 | YPDnc3 | YPDnc4 | EtOHnc1 | EtOHnc2 | Galnc1 | Galnc2 |
| 13 HTL1   | YCR020W-1 | YPDcl2 | YPDcl3 | EtOHcl1 | EtOHcl2 | Galcl1 | YPDnc1 | YPDnc2 | YPDnc3 | YPDnc4 | EtOHnc1 | EtOHnc2 | Galnc1 | Galnc2 |
| 13 OPI11  | YPR044C   | YPDcl2 | YPDcl3 | EtOHcl1 | EtOHcl2 | Galcl1 | YPDnc1 | YPDnc2 | YPDnc3 | YPDnc4 | EtOHnc1 | EtOHnc2 | Galnc1 | Galnc2 |
| 13        | YDR286C   | YPDcl2 | YPDcl3 | EtOHcl1 | EtOHcl2 | Galcl1 | YPDnc1 | YPDnc2 | YPDnc3 | YPDnc4 | EtOHnc1 | EtOHnc2 | Galnc1 | Galnc2 |
| 13        | YLR342W-1 | YPDcl2 | YPDcl3 | EtOHcl1 | EtOHcl2 | Galcl1 | YPDnc1 | YPDnc2 | YPDnc3 | YPDnc4 | EtOHnc1 | EtOHnc2 | Galnc1 | Galnc2 |
| 13 POM34  | YLR018C   | YPDcl2 | YPDcl3 | EtOHcl1 | EtOHcl2 | Galcl1 | YPDnc1 | YPDnc2 | YPDnc3 | YPDnc4 | EtOHnc1 | EtOHnc2 | Galnc1 | Galnc2 |
| 13 PDS5   | YMR076C   | YPDcl2 | YPDcl3 | EtOHcl1 | EtOHcl2 | Galcl1 | YPDnc1 | YPDnc2 | YPDnc3 | YPDnc4 | EtOHnc1 | EtOHnc2 | Galnc1 | Galnc2 |
| 13 TUM1   | YOR251C   | YPDcl2 | YPDcl3 | EtOHcl1 | EtOHcl2 | Galcl1 | YPDnc1 | YPDnc2 | YPDnc3 | YPDnc4 | EtOHnc1 | EtOHnc2 | Galnc1 | Galnc2 |
| 13        | YBR124W   | YPDcl2 | YPDcl3 | EtOHcl1 | EtOHcl2 | Galcl1 | YPDnc1 | YPDnc2 | YPDnc3 | YPDnc4 | EtOHnc1 | EtOHnc2 | Galnc1 | Galnc2 |
| 13 TIM8   | YJR135W-1 | YPDcl2 | YPDcl3 | EtOHcl1 | EtOHcl2 | Galcl1 | YPDnc1 | YPDnc2 | YPDnc3 | YPDnc4 | EtOHnc1 | EtOHnc2 | Galnc1 | Galnc2 |
| 13 RRP8   | YDR083W   | YPDcl2 | YPDcl3 | EtOHcl1 | EtOHcl2 | Galcl1 | YPDnc1 | YPDnc2 | YPDnc3 | YPDnc4 | EtOHnc1 | EtOHnc2 | Galnc1 | Galnc2 |
| 13        | YDR406W-1 | YPDcl2 | YPDcl3 | EtOHcl1 | EtOHcl2 | Galcl1 | YPDnc1 | YPDnc2 | YPDnc3 | YPDnc4 | EtOHnc1 | EtOHnc2 | Galnc1 | Galnc2 |
| 13 SEC72  | YLR292C   | YPDcl2 | YPDcl3 | EtOHcl1 | EtOHcl2 | Galcl1 | YPDnc1 | YPDnc2 | YPDnc3 | YPDnc4 | EtOHnc1 | EtOHnc2 | Galnc1 | Galnc2 |
| 13 PER1   | YCR044C   | YPDcl2 | YPDcl3 | EtOHcl1 | EtOHcl2 | Galcl1 | YPDnc1 | YPDnc2 | YPDnc3 | YPDnc4 | EtOHnc1 | EtOHnc2 | Galnc1 | Galnc2 |
| 13 GIS1   | YDR096W   | YPDcl2 | YPDcl3 | EtOHcl1 | EtOHcl2 | Galcl1 | YPDnc1 | YPDnc2 | YPDnc3 | YPDnc4 | EtOHnc1 | EtOHnc2 | Galnc1 | Galnc2 |
| 13 RPS12  | YOR369C   | YPDcl2 | YPDcl3 | EtOHcl1 | EtOHcl2 | Galcl1 | YPDnc1 | YPDnc2 | YPDnc3 | YPDnc4 | EtOHnc1 | EtOHnc2 | Galnc1 | Galnc2 |
| 13 RUP1   | YOR138C   | YPDcl2 | YPDcl3 | EtOHcl1 | EtOHcl2 | Galcl1 | YPDnc1 | YPDnc2 | YPDnc3 | YPDnc4 | EtOHnc1 | EtOHnc2 | Galnc1 | Galnc2 |
| 13 BRF1   | YGR246C   | YPDcl2 | YPDcl3 | EtOHcl1 | EtOHcl2 | Galcl1 | YPDnc1 | YPDnc2 | YPDnc3 | YPDnc4 | EtOHnc1 | EtOHnc2 | Galnc1 | Galnc2 |
| 13 IML1   | YJR138W   | YPDcl2 | YPDcl3 | EtOHcl1 | EtOHcl2 | Galcl1 | YPDnc1 | YPDnc2 | YPDnc3 | YPDnc4 | EtOHnc1 | EtOHnc2 | Galnc1 | Galnc2 |
| 13 FYV4   | YHR059W   | YPDcl2 | YPDcl3 | EtOHcl1 | EtOHcl2 | Galcl1 | YPDnc1 | YPDnc2 | YPDnc3 | YPDnc4 | EtOHnc1 | EtOHnc2 | Galnc1 | Galnc2 |
| 13 NSG2   | YNL156C   | YPDcl2 | YPDcl3 | EtOHcl1 | EtOHcl2 | Galcl1 | YPDnc1 | YPDnc2 | YPDnc3 | YPDnc4 | EtOHnc1 | EtOHnc2 | Galnc1 | Galnc2 |
| 13 YPT53  | YNL093W   | YPDcl2 | YPDcl3 | EtOHcl1 | EtOHcl2 | Galcl1 | YPDnc1 | YPDnc2 | YPDnc3 | YPDnc4 | EtOHnc1 | EtOHnc2 | Galnc1 | Galnc2 |
| 13 APQ12  | YIL040W   | YPDcl2 | YPDcl3 | EtOHcl1 | EtOHcl2 | Galcl1 | YPDnc1 | YPDnc2 | YPDnc3 | YPDnc4 | EtOHnc1 | EtOHnc2 | Galnc1 | Galnc2 |
| 13 EMG1   | YLR186W   | YPDcl2 | YPDcl3 | EtOHcl1 | EtOHcl2 | Galcl1 | YPDnc1 | YPDnc2 | YPDnc3 | YPDnc4 | EtOHnc1 | EtOHnc2 | Galnc1 | Galnc2 |
| 13 PCL10  | YGL134W   | YPDcl2 | YPDcl3 | EtOHcl1 | EtOHcl2 | Galcl1 | YPDnc1 | YPDnc2 | YPDnc3 | YPDnc4 | EtOHnc1 | EtOHnc2 | Galnc1 | Galnc2 |
| 13 RPL43B | YJR094W-1 | YPDcl2 | YPDcl3 | EtOHcl1 | EtOHcl2 | Galcl1 | YPDnc1 | YPDnc2 | YPDnc3 | YPDnc4 | EtOHnc1 | EtOHnc2 | Galnc1 | Galnc2 |

|    |        |           |        |        |         |         |        |        |        |        |        |         |         |        |        |
|----|--------|-----------|--------|--------|---------|---------|--------|--------|--------|--------|--------|---------|---------|--------|--------|
| 13 | SSD1   | YDR293C   | YPDcl2 | YPDcl3 | EtOHcl1 | EtOHcl2 | Galcl1 | YPDnc1 | YPDnc2 | YPDnc3 | YPDnc4 | EtOHnc1 | EtOHnc2 | Galnc1 | Galnc2 |
| 13 | SMM1   | YNR015W   | YPDcl2 | YPDcl3 | EtOHcl1 | EtOHcl2 | Galcl1 | YPDnc1 | YPDnc2 | YPDnc3 | YPDnc4 | EtOHnc1 | EtOHnc2 | Galnc1 | Galnc2 |
| 13 |        | YIL166C   | YPDcl2 | YPDcl3 | EtOHcl1 | EtOHcl2 | Galcl1 | YPDnc1 | YPDnc2 | YPDnc3 | YPDnc4 | EtOHnc1 | EtOHnc2 | Galnc1 | Galnc2 |
| 13 |        | YER184C   | YPDcl2 | YPDcl3 | EtOHcl1 | EtOHcl2 | Galcl1 | YPDnc1 | YPDnc2 | YPDnc3 | YPDnc4 | EtOHnc1 | EtOHnc2 | Galnc1 | Galnc2 |
| 13 |        | YJL047C-A | YPDcl2 | YPDcl3 | EtOHcl1 | EtOHcl2 | Galcl1 | YPDnc1 | YPDnc2 | YPDnc3 | YPDnc4 | EtOHnc1 | EtOHnc2 | Galnc1 | Galnc2 |
| 13 | TOA1   | YOR194C   | YPDcl2 | YPDcl3 | EtOHcl1 | EtOHcl2 | Galcl1 | YPDnc1 | YPDnc2 | YPDnc3 | YPDnc4 | EtOHnc1 | EtOHnc2 | Galnc1 | Galnc2 |
| 13 | YJU2   | YKL095W   | YPDcl2 | YPDcl3 | EtOHcl1 | EtOHcl2 | Galcl1 | YPDnc1 | YPDnc2 | YPDnc3 | YPDnc4 | EtOHnc1 | EtOHnc2 | Galnc1 | Galnc2 |
| 13 | SRB2   | YHR041C   | YPDcl2 | YPDcl3 | EtOHcl1 | EtOHcl2 | Galcl1 | YPDnc1 | YPDnc2 | YPDnc3 | YPDnc4 | EtOHnc1 | EtOHnc2 | Galnc1 | Galnc2 |
| 13 | RTC2   | YBR147W   | YPDcl2 | YPDcl3 | EtOHcl1 | EtOHcl2 | Galcl1 | YPDnc1 | YPDnc2 | YPDnc3 | YPDnc4 | EtOHnc1 | EtOHnc2 | Galnc1 | Galnc2 |
| 13 | MSH4   | YFL003C   | YPDcl2 | YPDcl3 | EtOHcl1 | EtOHcl2 | Galcl1 | YPDnc1 | YPDnc2 | YPDnc3 | YPDnc4 | EtOHnc1 | EtOHnc2 | Galnc1 | Galnc2 |
| 13 | RPL18A | YOL120C   | YPDcl2 | YPDcl3 | EtOHcl1 | EtOHcl2 | Galcl1 | YPDnc1 | YPDnc2 | YPDnc3 | YPDnc4 | EtOHnc1 | EtOHnc2 | Galnc1 | Galnc2 |
| 13 | CAT5   | YOR125C   | YPDcl2 | YPDcl3 | EtOHcl1 | EtOHcl2 | Galcl1 | YPDnc1 | YPDnc2 | YPDnc3 | YPDnc4 | EtOHnc1 | EtOHnc2 | Galnc1 | Galnc2 |
| 13 |        | YLR065C   | YPDcl2 | YPDcl3 | EtOHcl1 | EtOHcl2 | Galcl1 | YPDnc1 | YPDnc2 | YPDnc3 | YPDnc4 | EtOHnc1 | EtOHnc2 | Galnc1 | Galnc2 |
| 13 | ODC1   | YPL134C   | YPDcl2 | YPDcl3 | EtOHcl1 | EtOHcl2 | Galcl1 | YPDnc1 | YPDnc2 | YPDnc3 | YPDnc4 | EtOHnc1 | EtOHnc2 | Galnc1 | Galnc2 |
| 13 | VRG4   | YGL225W   | YPDcl2 | YPDcl3 | EtOHcl1 | EtOHcl2 | Galcl1 | YPDnc1 | YPDnc2 | YPDnc3 | YPDnc4 | EtOHnc1 | EtOHnc2 | Galnc1 | Galnc2 |
| 13 |        | YNL122C   | YPDcl2 | YPDcl3 | EtOHcl1 | EtOHcl2 | Galcl1 | YPDnc1 | YPDnc2 | YPDnc3 | YPDnc4 | EtOHnc1 | EtOHnc2 | Galnc1 | Galnc2 |
| 13 | SQS1   | YNL224C   | YPDcl2 | YPDcl3 | EtOHcl1 | EtOHcl2 | Galcl1 | YPDnc1 | YPDnc2 | YPDnc3 | YPDnc4 | EtOHnc1 | EtOHnc2 | Galnc1 | Galnc2 |
| 13 |        | YNL217W   | YPDcl2 | YPDcl3 | EtOHcl1 | EtOHcl2 | Galcl1 | YPDnc1 | YPDnc2 | YPDnc3 | YPDnc4 | EtOHnc1 | EtOHnc2 | Galnc1 | Galnc2 |
| 13 | AIM31  | YML030W   | YPDcl2 | YPDcl3 | EtOHcl1 | EtOHcl2 | Galcl1 | YPDnc1 | YPDnc2 | YPDnc3 | YPDnc4 | EtOHnc1 | EtOHnc2 | Galnc1 | Galnc2 |
| 13 | CYC3   | YAL039C   | YPDcl2 | YPDcl3 | EtOHcl1 | EtOHcl2 | Galcl1 | YPDnc1 | YPDnc2 | YPDnc3 | YPDnc4 | EtOHnc1 | EtOHnc2 | Galnc1 | Galnc2 |
| 13 | RPN8   | YOR261C   | YPDcl2 | YPDcl3 | EtOHcl1 | EtOHcl2 | Galcl1 | YPDnc1 | YPDnc2 | YPDnc3 | YPDnc4 | EtOHnc1 | EtOHnc2 | Galnc1 | Galnc2 |
| 13 | NPC2   | YDL046W   | YPDcl2 | YPDcl3 | EtOHcl1 | EtOHcl2 | Galcl1 | YPDnc1 | YPDnc2 | YPDnc3 | YPDnc4 | EtOHnc1 | EtOHnc2 | Galnc1 | Galnc2 |
| 13 | SAP30  | YMR263W   | YPDcl2 | YPDcl3 | EtOHcl1 | EtOHcl2 | Galcl1 | YPDnc1 | YPDnc2 | YPDnc3 | YPDnc4 | EtOHnc1 | EtOHnc2 | Galnc1 | Galnc2 |
| 13 | SKM1   | YOL113W   | YPDcl2 | YPDcl3 | EtOHcl1 | EtOHcl2 | Galcl1 | YPDnc1 | YPDnc2 | YPDnc3 | YPDnc4 | EtOHnc1 | EtOHnc2 | Galnc1 | Galnc2 |
| 13 | GRH1   | YDR517W   | YPDcl2 | YPDcl3 | EtOHcl1 | EtOHcl2 | Galcl1 | YPDnc1 | YPDnc2 | YPDnc3 | YPDnc4 | EtOHnc1 | EtOHnc2 | Galnc1 | Galnc2 |
| 13 | TFC3   | YAL001C   | YPDcl2 | YPDcl3 | EtOHcl1 | EtOHcl2 | Galcl1 | YPDnc1 | YPDnc2 | YPDnc3 | YPDnc4 | EtOHnc1 | EtOHnc2 | Galnc1 | Galnc2 |
| 13 |        | YBR197C   | YPDcl2 | YPDcl3 | EtOHcl1 | EtOHcl2 | Galcl1 | YPDnc1 | YPDnc2 | YPDnc3 | YPDnc4 | EtOHnc1 | EtOHnc2 | Galnc1 | Galnc2 |
| 13 | NMD5   | YJR132W   | YPDcl2 | YPDcl3 | EtOHcl1 | EtOHcl2 | Galcl1 | YPDnc1 | YPDnc2 | YPDnc3 | YPDnc4 | EtOHnc1 | EtOHnc2 | Galnc1 | Galnc2 |
| 13 | RPN3   | YER021W   | YPDcl2 | YPDcl3 | EtOHcl1 | EtOHcl2 | Galcl1 | YPDnc1 | YPDnc2 | YPDnc3 | YPDnc4 | EtOHnc1 | EtOHnc2 | Galnc1 | Galnc2 |
| 13 | URB1   | YKL014C   | YPDcl2 | YPDcl3 | EtOHcl1 | EtOHcl2 | Galcl1 | YPDnc1 | YPDnc2 | YPDnc3 | YPDnc4 | EtOHnc1 | EtOHnc2 | Galnc1 | Galnc2 |
| 13 |        | YGL034C   | YPDcl2 | YPDcl3 | EtOHcl1 | EtOHcl2 | Galcl1 | YPDnc1 | YPDnc2 | YPDnc3 | YPDnc4 | EtOHnc1 | EtOHnc2 | Galnc1 | Galnc2 |
| 13 | SNG1   | YGR197C   | YPDcl2 | YPDcl3 | EtOHcl1 | EtOHcl2 | Galcl1 | YPDnc1 | YPDnc2 | YPDnc3 | YPDnc4 | EtOHnc1 | EtOHnc2 | Galnc1 | Galnc2 |
| 13 | PHO2   | YDL106C   | YPDcl2 | YPDcl3 | EtOHcl1 | EtOHcl2 | Galcl1 | YPDnc1 | YPDnc2 | YPDnc3 | YPDnc4 | EtOHnc1 | EtOHnc2 | Galnc1 | Galnc2 |
| 13 | ERG24  | YNL280C   | YPDcl2 | YPDcl3 | EtOHcl1 | EtOHcl2 | Galcl1 | YPDnc1 | YPDnc2 | YPDnc3 | YPDnc4 | EtOHnc1 | EtOHnc2 | Galnc1 | Galnc2 |

|    |        |           |        |        |         |         |        |        |        |        |        |         |         |        |        |
|----|--------|-----------|--------|--------|---------|---------|--------|--------|--------|--------|--------|---------|---------|--------|--------|
| 13 | PSP1   | YDR505C   | YPDcl2 | YPDcl3 | EtOHcl1 | EtOHcl2 | Galcl1 | YPDnc1 | YPDnc2 | YPDnc3 | YPDnc4 | EtOHnc1 | EtOHnc2 | Galnc1 | Galnc2 |
| 13 | SYP1   | YCR030C   | YPDcl2 | YPDcl3 | EtOHcl1 | EtOHcl2 | Galcl1 | YPDnc1 | YPDnc2 | YPDnc3 | YPDnc4 | EtOHnc1 | EtOHnc2 | Galnc1 | Galnc2 |
| 13 | ARO8   | YGL202W   | YPDcl2 | YPDcl3 | EtOHcl1 | EtOHcl2 | Galcl1 | YPDnc1 | YPDnc2 | YPDnc3 | YPDnc4 | EtOHnc1 | EtOHnc2 | Galnc1 | Galnc2 |
| 13 |        | YBL036C   | YPDcl2 | YPDcl3 | EtOHcl1 | EtOHcl2 | Galcl1 | YPDnc1 | YPDnc2 | YPDnc3 | YPDnc4 | EtOHnc1 | EtOHnc2 | Galnc1 | Galnc2 |
| 13 |        | YBR221W-  | YPDcl2 | YPDcl3 | EtOHcl1 | EtOHcl2 | Galcl1 | YPDnc1 | YPDnc2 | YPDnc3 | YPDnc4 | EtOHnc1 | EtOHnc2 | Galnc1 | Galnc2 |
| 13 | PEX11  | YOL147C   | YPDcl2 | YPDcl3 | EtOHcl1 | EtOHcl2 | Galcl1 | YPDnc1 | YPDnc2 | YPDnc3 | YPDnc4 | EtOHnc1 | EtOHnc2 | Galnc1 | Galnc2 |
| 13 | YFH7   | YFR007W   | YPDcl2 | YPDcl3 | EtOHcl1 | EtOHcl2 | Galcl1 | YPDnc1 | YPDnc2 | YPDnc3 | YPDnc4 | EtOHnc1 | EtOHnc2 | Galnc1 | Galnc2 |
| 13 | RPL16B | YNL069C   | YPDcl2 | YPDcl3 | EtOHcl1 | EtOHcl2 | Galcl1 | YPDnc1 | YPDnc2 | YPDnc3 | YPDnc4 | EtOHnc1 | EtOHnc2 | Galnc1 | Galnc2 |
| 13 | SRB4   | YER022W   | YPDcl2 | YPDcl3 | EtOHcl1 | EtOHcl2 | Galcl1 | YPDnc1 | YPDnc2 | YPDnc3 | YPDnc4 | EtOHnc1 | EtOHnc2 | Galnc1 | Galnc2 |
| 13 |        | YJR008W   | YPDcl2 | YPDcl3 | EtOHcl1 | EtOHcl2 | Galcl1 | YPDnc1 | YPDnc2 | YPDnc3 | YPDnc4 | EtOHnc1 | EtOHnc2 | Galnc1 | Galnc2 |
| 13 | JEN1   | YKL217W   | YPDcl2 | YPDcl3 | EtOHcl1 | EtOHcl2 | Galcl1 | YPDnc1 | YPDnc2 | YPDnc3 | YPDnc4 | EtOHnc1 | EtOHnc2 | Galnc1 | Galnc2 |
| 13 | AIM13  | YFR011C   | YPDcl2 | YPDcl3 | EtOHcl1 | EtOHcl2 | Galcl1 | YPDnc1 | YPDnc2 | YPDnc3 | YPDnc4 | EtOHnc1 | EtOHnc2 | Galnc1 | Galnc2 |
| 13 | RPL34A | YER056C-A | YPDcl2 | YPDcl3 | EtOHcl1 | EtOHcl2 | Galcl1 | YPDnc1 | YPDnc2 | YPDnc3 | YPDnc4 | EtOHnc1 | EtOHnc2 | Galnc1 | Galnc2 |
| 13 | CST26  | YBR042C   | YPDcl2 | YPDcl3 | EtOHcl1 | EtOHcl2 | Galcl1 | YPDnc1 | YPDnc2 | YPDnc3 | YPDnc4 | EtOHnc1 | EtOHnc2 | Galnc1 | Galnc2 |
| 13 | SPC72  | YAL047C   | YPDcl2 | YPDcl3 | EtOHcl1 | EtOHcl2 | Galcl1 | YPDnc1 | YPDnc2 | YPDnc3 | YPDnc4 | EtOHnc1 | EtOHnc2 | Galnc1 | Galnc2 |
| 13 | NOP7   | YGR103W   | YPDcl2 | YPDcl3 | EtOHcl1 | EtOHcl2 | Galcl1 | YPDnc1 | YPDnc2 | YPDnc3 | YPDnc4 | EtOHnc1 | EtOHnc2 | Galnc1 | Galnc2 |
| 13 |        | YLR171W   | YPDcl2 | YPDcl3 | EtOHcl1 | EtOHcl2 | Galcl1 | YPDnc1 | YPDnc2 | YPDnc3 | YPDnc4 | EtOHnc1 | EtOHnc2 | Galnc1 | Galnc2 |
| 13 | PLP2   | YOR281C   | YPDcl2 | YPDcl3 | EtOHcl1 | EtOHcl2 | Galcl1 | YPDnc1 | YPDnc2 | YPDnc3 | YPDnc4 | EtOHnc1 | EtOHnc2 | Galnc1 | Galnc2 |
| 13 | TOS1   | YBR162C   | YPDcl2 | YPDcl3 | EtOHcl1 | EtOHcl2 | Galcl1 | YPDnc1 | YPDnc2 | YPDnc3 | YPDnc4 | EtOHnc1 | EtOHnc2 | Galnc1 | Galnc2 |
| 13 |        | YMR114C   | YPDcl2 | YPDcl3 | EtOHcl1 | EtOHcl2 | Galcl1 | YPDnc1 | YPDnc2 | YPDnc3 | YPDnc4 | EtOHnc1 | EtOHnc2 | Galnc1 | Galnc2 |
| 13 |        | YJL067W   | YPDcl2 | YPDcl3 | EtOHcl1 | EtOHcl2 | Galcl1 | YPDnc1 | YPDnc2 | YPDnc3 | YPDnc4 | EtOHnc1 | EtOHnc2 | Galnc1 | Galnc2 |
| 13 |        | YGR251W   | YPDcl2 | YPDcl3 | EtOHcl1 | EtOHcl2 | Galcl1 | YPDnc1 | YPDnc2 | YPDnc3 | YPDnc4 | EtOHnc1 | EtOHnc2 | Galnc1 | Galnc2 |
| 13 |        | YDR118W-  | YPDcl2 | YPDcl3 | EtOHcl1 | EtOHcl2 | Galcl1 | YPDnc1 | YPDnc2 | YPDnc3 | YPDnc4 | EtOHnc1 | EtOHnc2 | Galnc1 | Galnc2 |
| 13 | PBY1   | YBR094W   | YPDcl2 | YPDcl3 | EtOHcl1 | EtOHcl2 | Galcl1 | YPDnc1 | YPDnc2 | YPDnc3 | YPDnc4 | EtOHnc1 | EtOHnc2 | Galnc1 | Galnc2 |
| 13 | NAG1   | YGR031C-A | YPDcl2 | YPDcl3 | EtOHcl1 | EtOHcl2 | Galcl1 | YPDnc1 | YPDnc2 | YPDnc3 | YPDnc4 | EtOHnc1 | EtOHnc2 | Galnc1 | Galnc2 |
| 13 | HFM1   | YGL251C   | YPDcl2 | YPDcl3 | EtOHcl1 | EtOHcl2 | Galcl1 | YPDnc1 | YPDnc2 | YPDnc3 | YPDnc4 | EtOHnc1 | EtOHnc2 | Galnc1 | Galnc2 |
| 13 | PMP2   | YEL017C-A | YPDcl2 | YPDcl3 | EtOHcl1 | EtOHcl2 | Galcl1 | YPDnc1 | YPDnc2 | YPDnc3 | YPDnc4 | EtOHnc1 | EtOHnc2 | Galnc1 | Galnc2 |
| 13 | MAK11  | YKL021C   | YPDcl2 | YPDcl3 | EtOHcl1 | EtOHcl2 | Galcl1 | YPDnc1 | YPDnc2 | YPDnc3 | YPDnc4 | EtOHnc1 | EtOHnc2 | Galnc1 | Galnc2 |
| 13 | SAP190 | YKR028W   | YPDcl2 | YPDcl3 | EtOHcl1 | EtOHcl2 | Galcl1 | YPDnc1 | YPDnc2 | YPDnc3 | YPDnc4 | EtOHnc1 | EtOHnc2 | Galnc1 | Galnc2 |
| 13 |        | YNR062C   | YPDcl2 | YPDcl3 | EtOHcl1 | EtOHcl2 | Galcl1 | YPDnc1 | YPDnc2 | YPDnc3 | YPDnc4 | EtOHnc1 | EtOHnc2 | Galnc1 | Galnc2 |
| 13 |        | YHL026C   | YPDcl2 | YPDcl3 | EtOHcl1 | EtOHcl2 | Galcl1 | YPDnc1 | YPDnc2 | YPDnc3 | YPDnc4 | EtOHnc1 | EtOHnc2 | Galnc1 | Galnc2 |
| 13 | PET117 | YER058W   | YPDcl2 | YPDcl3 | EtOHcl1 | EtOHcl2 | Galcl1 | YPDnc1 | YPDnc2 | YPDnc3 | YPDnc4 | EtOHnc1 | EtOHnc2 | Galnc1 | Galnc2 |
| 13 |        | YCR016W   | YPDcl2 | YPDcl3 | EtOHcl1 | EtOHcl2 | Galcl1 | YPDnc1 | YPDnc2 | YPDnc3 | YPDnc4 | EtOHnc1 | EtOHnc2 | Galnc1 | Galnc2 |
| 13 | PEA2   | YER149C   | YPDcl2 | YPDcl3 | EtOHcl1 | EtOHcl2 | Galcl1 | YPDnc1 | YPDnc2 | YPDnc3 | YPDnc4 | EtOHnc1 | EtOHnc2 | Galnc1 | Galnc2 |

|          |           |        |        |         |         |        |        |        |        |        |         |         |        |        |
|----------|-----------|--------|--------|---------|---------|--------|--------|--------|--------|--------|---------|---------|--------|--------|
| 13       | YJL147C   | YPDcl2 | YPDcl3 | EtOHcl1 | EtOHcl2 | Galcl1 | YPDnc1 | YPDnc2 | YPDnc3 | YPDnc4 | EtOHnc1 | EtOHnc2 | Galnc1 | Galnc2 |
| 13 EDC1  | YGL222C   | YPDcl2 | YPDcl3 | EtOHcl1 | EtOHcl2 | Galcl1 | YPDnc1 | YPDnc2 | YPDnc3 | YPDnc4 | EtOHnc1 | EtOHnc2 | Galnc1 | Galnc2 |
| 13 RAM1  | YDL090C   | YPDcl2 | YPDcl3 | EtOHcl1 | EtOHcl2 | Galcl1 | YPDnc1 | YPDnc2 | YPDnc3 | YPDnc4 | EtOHnc1 | EtOHnc2 | Galnc1 | Galnc2 |
| 13       | YOR034C-A | YPDcl2 | YPDcl3 | EtOHcl1 | EtOHcl2 | Galcl1 | YPDnc1 | YPDnc2 | YPDnc3 | YPDnc4 | EtOHnc1 | EtOHnc2 | Galnc1 | Galnc2 |
| 13 MNT4  | YNR059W   | YPDcl2 | YPDcl3 | EtOHcl1 | EtOHcl2 | Galcl1 | YPDnc1 | YPDnc2 | YPDnc3 | YPDnc4 | EtOHnc1 | EtOHnc2 | Galnc1 | Galnc2 |
| 13 SPC3  | YLR066W   | YPDcl2 | YPDcl3 | EtOHcl1 | EtOHcl2 | Galcl1 | YPDnc1 | YPDnc2 | YPDnc3 | YPDnc4 | EtOHnc1 | EtOHnc2 | Galnc1 | Galnc2 |
| 13 PTC4  | YBR125C   | YPDcl2 | YPDcl3 | EtOHcl1 | EtOHcl2 | Galcl1 | YPDnc1 | YPDnc2 | YPDnc3 | YPDnc4 | EtOHnc1 | EtOHnc2 | Galnc1 | Galnc2 |
| 13       | YOR376W   | YPDcl2 | YPDcl3 | EtOHcl1 | EtOHcl2 | Galcl1 | YPDnc1 | YPDnc2 | YPDnc3 | YPDnc4 | EtOHnc1 | EtOHnc2 | Galnc1 | Galnc2 |
| 13       | YCL023C   | YPDcl2 | YPDcl3 | EtOHcl1 | EtOHcl2 | Galcl1 | YPDnc1 | YPDnc2 | YPDnc3 | YPDnc4 | EtOHnc1 | EtOHnc2 | Galnc1 | Galnc2 |
| 13 UMP1  | YBR173C   | YPDcl2 | YPDcl3 | EtOHcl1 | EtOHcl2 | Galcl1 | YPDnc1 | YPDnc2 | YPDnc3 | YPDnc4 | EtOHnc1 | EtOHnc2 | Galnc1 | Galnc2 |
| 13 CPR2  | YHR057C   | YPDcl2 | YPDcl3 | EtOHcl1 | EtOHcl2 | Galcl1 | YPDnc1 | YPDnc2 | YPDnc3 | YPDnc4 | EtOHnc1 | EtOHnc2 | Galnc1 | Galnc2 |
| 13 RTS2  | YOR077W   | YPDcl2 | YPDcl3 | EtOHcl1 | EtOHcl2 | Galcl1 | YPDnc1 | YPDnc2 | YPDnc3 | YPDnc4 | EtOHnc1 | EtOHnc2 | Galnc1 | Galnc2 |
| 13 OAF1  | YAL051W   | YPDcl2 | YPDcl3 | EtOHcl1 | EtOHcl2 | Galcl1 | YPDnc1 | YPDnc2 | YPDnc3 | YPDnc4 | EtOHnc1 | EtOHnc2 | Galnc1 | Galnc2 |
| 13       | YJR124C   | YPDcl2 | YPDcl3 | EtOHcl1 | EtOHcl2 | Galcl1 | YPDnc1 | YPDnc2 | YPDnc3 | YPDnc4 | EtOHnc1 | EtOHnc2 | Galnc1 | Galnc2 |
| 13 CDC12 | YHR107C   | YPDcl2 | YPDcl3 | EtOHcl1 | EtOHcl2 | Galcl1 | YPDnc1 | YPDnc2 | YPDnc3 | YPDnc4 | EtOHnc1 | EtOHnc2 | Galnc1 | Galnc2 |
| 13 LSM4  | YER112W   | YPDcl2 | YPDcl3 | EtOHcl1 | EtOHcl2 | Galcl1 | YPDnc1 | YPDnc2 | YPDnc3 | YPDnc4 | EtOHnc1 | EtOHnc2 | Galnc1 | Galnc2 |
| 13 IDP2  | YLR174W   | YPDcl2 | YPDcl3 | EtOHcl1 | EtOHcl2 | Galcl1 | YPDnc1 | YPDnc2 | YPDnc3 | YPDnc4 | EtOHnc1 | EtOHnc2 | Galnc1 | Galnc2 |
| 13 FRM2  | YCL026C-A | YPDcl2 | YPDcl3 | EtOHcl1 | EtOHcl2 | Galcl1 | YPDnc1 | YPDnc2 | YPDnc3 | YPDnc4 | EtOHnc1 | EtOHnc2 | Galnc1 | Galnc2 |
| 13 CLB1  | YGR108W   | YPDcl2 | YPDcl3 | EtOHcl1 | EtOHcl2 | Galcl1 | YPDnc1 | YPDnc2 | YPDnc3 | YPDnc4 | EtOHnc1 | EtOHnc2 | Galnc1 | Galnc2 |
| 13 SVF1  | YDR346C   | YPDcl2 | YPDcl3 | EtOHcl1 | EtOHcl2 | Galcl1 | YPDnc1 | YPDnc2 | YPDnc3 | YPDnc4 | EtOHnc1 | EtOHnc2 | Galnc1 | Galnc2 |
| 13 RLI1  | YDR091C   | YPDcl2 | YPDcl3 | EtOHcl1 | EtOHcl2 | Galcl1 | YPDnc1 | YPDnc2 | YPDnc3 | YPDnc4 | EtOHnc1 | EtOHnc2 | Galnc1 | Galnc2 |
| 13 OST4  | YDL232W   | YPDcl2 | YPDcl3 | EtOHcl1 | EtOHcl2 | Galcl1 | YPDnc1 | YPDnc2 | YPDnc3 | YPDnc4 | EtOHnc1 | EtOHnc2 | Galnc1 | Galnc2 |
| 13       | YER165C-A | YPDcl2 | YPDcl3 | EtOHcl1 | EtOHcl2 | Galcl1 | YPDnc1 | YPDnc2 | YPDnc3 | YPDnc4 | EtOHnc1 | EtOHnc2 | Galnc1 | Galnc2 |
| 13 CLF1  | YLR117C   | YPDcl2 | YPDcl3 | EtOHcl1 | EtOHcl2 | Galcl1 | YPDnc1 | YPDnc2 | YPDnc3 | YPDnc4 | EtOHnc1 | EtOHnc2 | Galnc1 | Galnc2 |
| 13 HXT13 | YEL069C   | YPDcl2 | YPDcl3 | EtOHcl1 | EtOHcl2 | Galcl1 | YPDnc1 | YPDnc2 | YPDnc3 | YPDnc4 | EtOHnc1 | EtOHnc2 | Galnc1 | Galnc2 |
| 13 SPO23 | YBR250W   | YPDcl2 | YPDcl3 | EtOHcl1 | EtOHcl2 | Galcl1 | YPDnc1 | YPDnc2 | YPDnc3 | YPDnc4 | EtOHnc1 | EtOHnc2 | Galnc1 | Galnc2 |
| 13 SAN1  | YDR143C   | YPDcl2 | YPDcl3 | EtOHcl1 | EtOHcl2 | Galcl1 | YPDnc1 | YPDnc2 | YPDnc3 | YPDnc4 | EtOHnc1 | EtOHnc2 | Galnc1 | Galnc2 |
| 13 PUG1  | YER185W   | YPDcl2 | YPDcl3 | EtOHcl1 | EtOHcl2 | Galcl1 | YPDnc1 | YPDnc2 | YPDnc3 | YPDnc4 | EtOHnc1 | EtOHnc2 | Galnc1 | Galnc2 |
| 13 HRD1  | YOL013C   | YPDcl2 | YPDcl3 | EtOHcl1 | EtOHcl2 | Galcl1 | YPDnc1 | YPDnc2 | YPDnc3 | YPDnc4 | EtOHnc1 | EtOHnc2 | Galnc1 | Galnc2 |
| 13 GIP4  | YAL031C   | YPDcl2 | YPDcl3 | EtOHcl1 | EtOHcl2 | Galcl1 | YPDnc1 | YPDnc2 | YPDnc3 | YPDnc4 | EtOHnc1 | EtOHnc2 | Galnc1 | Galnc2 |
| 13       | YGR139W   | YPDcl2 | YPDcl3 | EtOHcl1 | EtOHcl2 | Galcl1 | YPDnc1 | YPDnc2 | YPDnc3 | YPDnc4 | EtOHnc1 | EtOHnc2 | Galnc1 | Galnc2 |
| 13 ALT1  | YLR089C   | YPDcl2 | YPDcl3 | EtOHcl1 | EtOHcl2 | Galcl1 | YPDnc1 | YPDnc2 | YPDnc3 | YPDnc4 | EtOHnc1 | EtOHnc2 | Galnc1 | Galnc2 |
| 13 RSM22 | YKL155C   | YPDcl2 | YPDcl3 | EtOHcl1 | EtOHcl2 | Galcl1 | YPDnc1 | YPDnc2 | YPDnc3 | YPDnc4 | EtOHnc1 | EtOHnc2 | Galnc1 | Galnc2 |
| 13       | YKL222C   | YPDcl2 | YPDcl3 | EtOHcl1 | EtOHcl2 | Galcl1 | YPDnc1 | YPDnc2 | YPDnc3 | YPDnc4 | EtOHnc1 | EtOHnc2 | Galnc1 | Galnc2 |

|    |       |          |        |        |         |         |        |        |        |        |        |         |         |        |        |
|----|-------|----------|--------|--------|---------|---------|--------|--------|--------|--------|--------|---------|---------|--------|--------|
| 13 | NOP1  | YDL014W  | YPDcl2 | YPDcl3 | EtOHcl1 | EtOHcl2 | Galcl1 | YPDnc1 | YPDnc2 | YPDnc3 | YPDnc4 | EtOHnc1 | EtOHnc2 | Galnc1 | Galnc2 |
| 13 | CHA1  | YCL064C  | YPDcl2 | YPDcl3 | EtOHcl1 | EtOHcl2 | Galcl1 | YPDnc1 | YPDnc2 | YPDnc3 | YPDnc4 | EtOHnc1 | EtOHnc2 | Galnc1 | Galnc2 |
| 13 | AIM8  | YDR493W  | YPDcl2 | YPDcl3 | EtOHcl1 | EtOHcl2 | Galcl1 | YPDnc1 | YPDnc2 | YPDnc3 | YPDnc4 | EtOHnc1 | EtOHnc2 | Galnc1 | Galnc2 |
| 13 | MIC14 | YDR031W  | YPDcl2 | YPDcl3 | EtOHcl1 | EtOHcl2 | Galcl1 | YPDnc1 | YPDnc2 | YPDnc3 | YPDnc4 | EtOHnc1 | EtOHnc2 | Galnc1 | Galnc2 |
| 13 | UFD2  | YDL190C  | YPDcl2 | YPDcl3 | EtOHcl1 | EtOHcl2 | Galcl1 | YPDnc1 | YPDnc2 | YPDnc3 | YPDnc4 | EtOHnc1 | EtOHnc2 | Galnc1 | Galnc2 |
| 13 | DAD2  | YKR083C  | YPDcl2 | YPDcl3 | EtOHcl1 | EtOHcl2 | Galcl1 | YPDnc1 | YPDnc2 | YPDnc3 | YPDnc4 | EtOHnc1 | EtOHnc2 | Galnc1 | Galnc2 |
| 13 |       | YBR141C  | YPDcl2 | YPDcl3 | EtOHcl1 | EtOHcl2 | Galcl1 | YPDnc1 | YPDnc2 | YPDnc3 | YPDnc4 | EtOHnc1 | EtOHnc2 | Galnc1 | Galnc2 |
| 13 | TSA2  | YDR453C  | YPDcl2 | YPDcl3 | EtOHcl1 | EtOHcl2 | Galcl1 | YPDnc1 | YPDnc2 | YPDnc3 | YPDnc4 | EtOHnc1 | EtOHnc2 | Galnc1 | Galnc2 |
| 13 |       | YER107W- | YPDcl2 | YPDcl3 | EtOHcl1 | EtOHcl2 | Galcl1 | YPDnc1 | YPDnc2 | YPDnc3 | YPDnc4 | EtOHnc1 | EtOHnc2 | Galnc1 | Galnc2 |
| 13 |       | YNL193W  | YPDcl2 | YPDcl3 | EtOHcl1 | EtOHcl2 | Galcl1 | YPDnc1 | YPDnc2 | YPDnc3 | YPDnc4 | EtOHnc1 | EtOHnc2 | Galnc1 | Galnc2 |
| 13 | TRA1  | YHR099W  | YPDcl2 | YPDcl3 | EtOHcl1 | EtOHcl2 | Galcl1 | YPDnc1 | YPDnc2 | YPDnc3 | YPDnc4 | EtOHnc1 | EtOHnc2 | Galnc1 | Galnc2 |
| 13 |       | YPR170W- | YPDcl2 | YPDcl3 | EtOHcl1 | EtOHcl2 | Galcl1 | YPDnc1 | YPDnc2 | YPDnc3 | YPDnc4 | EtOHnc1 | EtOHnc2 | Galnc1 | Galnc2 |
| 13 |       | YKL070W  | YPDcl2 | YPDcl3 | EtOHcl1 | EtOHcl2 | Galcl1 | YPDnc1 | YPDnc2 | YPDnc3 | YPDnc4 | EtOHnc1 | EtOHnc2 | Galnc1 | Galnc2 |
| 13 |       | YKL145W- | YPDcl2 | YPDcl3 | EtOHcl1 | EtOHcl2 | Galcl1 | YPDnc1 | YPDnc2 | YPDnc3 | YPDnc4 | EtOHnc1 | EtOHnc2 | Galnc1 | Galnc2 |
| 13 | SEN1  | YLR430W  | YPDcl2 | YPDcl3 | EtOHcl1 | EtOHcl2 | Galcl1 | YPDnc1 | YPDnc2 | YPDnc3 | YPDnc4 | EtOHnc1 | EtOHnc2 | Galnc1 | Galnc2 |
| 13 | NPR3  | YHL023C  | YPDcl2 | YPDcl3 | EtOHcl1 | EtOHcl2 | Galcl1 | YPDnc1 | YPDnc2 | YPDnc3 | YPDnc4 | EtOHnc1 | EtOHnc2 | Galnc1 | Galnc2 |
| 13 |       | YOR283W  | YPDcl2 | YPDcl3 | EtOHcl1 | EtOHcl2 | Galcl1 | YPDnc1 | YPDnc2 | YPDnc3 | YPDnc4 | EtOHnc1 | EtOHnc2 | Galnc1 | Galnc2 |
| 13 |       | YMR052C- | YPDcl2 | YPDcl3 | EtOHcl1 | EtOHcl2 | Galcl1 | YPDnc1 | YPDnc2 | YPDnc3 | YPDnc4 | EtOHnc1 | EtOHnc2 | Galnc1 | Galnc2 |
| 13 |       | YHL005C  | YPDcl2 | YPDcl3 | EtOHcl1 | EtOHcl2 | Galcl1 | YPDnc1 | YPDnc2 | YPDnc3 | YPDnc4 | EtOHnc1 | EtOHnc2 | Galnc1 | Galnc2 |
| 13 |       | YDR029W  | YPDcl2 | YPDcl3 | EtOHcl1 | EtOHcl2 | Galcl1 | YPDnc1 | YPDnc2 | YPDnc3 | YPDnc4 | EtOHnc1 | EtOHnc2 | Galnc1 | Galnc2 |
| 13 | MRH1  | YDR033W  | YPDcl2 | YPDcl3 | EtOHcl1 | EtOHcl2 | Galcl1 | YPDnc1 | YPDnc2 | YPDnc3 | YPDnc4 | EtOHnc1 | EtOHnc2 | Galnc1 | Galnc2 |
| 13 |       | YNL043C  | YPDcl2 | YPDcl3 | EtOHcl1 | EtOHcl2 | Galcl1 | YPDnc1 | YPDnc2 | YPDnc3 | YPDnc4 | EtOHnc1 | EtOHnc2 | Galnc1 | Galnc2 |
| 13 | MET32 | YDR253C  | YPDcl2 | YPDcl3 | EtOHcl1 | EtOHcl2 | Galcl1 | YPDnc1 | YPDnc2 | YPDnc3 | YPDnc4 | EtOHnc1 | EtOHnc2 | Galnc1 | Galnc2 |
| 13 | ZWF1  | YNL241C  | YPDcl2 | YPDcl3 | EtOHcl1 | EtOHcl2 | Galcl1 | YPDnc1 | YPDnc2 | YPDnc3 | YPDnc4 | EtOHnc1 | EtOHnc2 | Galnc1 | Galnc2 |
| 13 | PRP45 | YAL032C  | YPDcl2 | YPDcl3 | EtOHcl1 | EtOHcl2 | Galcl1 | YPDnc1 | YPDnc2 | YPDnc3 | YPDnc4 | EtOHnc1 | EtOHnc2 | Galnc1 | Galnc2 |
| 13 | MID1  | YNL291C  | YPDcl2 | YPDcl3 | EtOHcl1 | EtOHcl2 | Galcl1 | YPDnc1 | YPDnc2 | YPDnc3 | YPDnc4 | EtOHnc1 | EtOHnc2 | Galnc1 | Galnc2 |
| 13 | PUT4  | YOR348C  | YPDcl2 | YPDcl3 | EtOHcl1 | EtOHcl2 | Galcl1 | YPDnc1 | YPDnc2 | YPDnc3 | YPDnc4 | EtOHnc1 | EtOHnc2 | Galnc1 | Galnc2 |
| 13 |       | YOR097C  | YPDcl2 | YPDcl3 | EtOHcl1 | EtOHcl2 | Galcl1 | YPDnc1 | YPDnc2 | YPDnc3 | YPDnc4 | EtOHnc1 | EtOHnc2 | Galnc1 | Galnc2 |
| 13 | MDH2  | YOL126C  | YPDcl2 | YPDcl3 | EtOHcl1 | EtOHcl2 | Galcl1 | YPDnc1 | YPDnc2 | YPDnc3 | YPDnc4 | EtOHnc1 | EtOHnc2 | Galnc1 | Galnc2 |
| 13 | DUO1  | YGL061C  | YPDcl2 | YPDcl3 | EtOHcl1 | EtOHcl2 | Galcl1 | YPDnc1 | YPDnc2 | YPDnc3 | YPDnc4 | EtOHnc1 | EtOHnc2 | Galnc1 | Galnc2 |
| 13 | SIP4  | YJL089W  | YPDcl2 | YPDcl3 | EtOHcl1 | EtOHcl2 | Galcl1 | YPDnc1 | YPDnc2 | YPDnc3 | YPDnc4 | EtOHnc1 | EtOHnc2 | Galnc1 | Galnc2 |
| 13 | WSS1  | YHR134W  | YPDcl2 | YPDcl3 | EtOHcl1 | EtOHcl2 | Galcl1 | YPDnc1 | YPDnc2 | YPDnc3 | YPDnc4 | EtOHnc1 | EtOHnc2 | Galnc1 | Galnc2 |
| 13 |       | YOR022C  | YPDcl2 | YPDcl3 | EtOHcl1 | EtOHcl2 | Galcl1 | YPDnc1 | YPDnc2 | YPDnc3 | YPDnc4 | EtOHnc1 | EtOHnc2 | Galnc1 | Galnc2 |
| 13 | SLX1  | YBR228W  | YPDcl2 | YPDcl3 | EtOHcl1 | EtOHcl2 | Galcl1 | YPDnc1 | YPDnc2 | YPDnc3 | YPDnc4 | EtOHnc1 | EtOHnc2 | Galnc1 | Galnc2 |

|           |           |        |        |         |         |        |        |        |        |        |         |         |        |        |
|-----------|-----------|--------|--------|---------|---------|--------|--------|--------|--------|--------|---------|---------|--------|--------|
| 13 PPT1   | YGR123C   | YPDcl2 | YPDcl3 | EtOHcl1 | EtOHcl2 | Galcl1 | YPDnc1 | YPDnc2 | YPDnc3 | YPDnc4 | EtOHnc1 | EtOHnc2 | Galnc1 | Galnc2 |
| 13 ERG8   | YMR220W   | YPDcl2 | YPDcl3 | EtOHcl1 | EtOHcl2 | Galcl1 | YPDnc1 | YPDnc2 | YPDnc3 | YPDnc4 | EtOHnc1 | EtOHnc2 | Galnc1 | Galnc2 |
| 13 FMP21  | YBR269C   | YPDcl2 | YPDcl3 | EtOHcl1 | EtOHcl2 | Galcl1 | YPDnc1 | YPDnc2 | YPDnc3 | YPDnc4 | EtOHnc1 | EtOHnc2 | Galnc1 | Galnc2 |
| 13 MRPS17 | YMR188C   | YPDcl2 | YPDcl3 | EtOHcl1 | EtOHcl2 | Galcl1 | YPDnc1 | YPDnc2 | YPDnc3 | YPDnc4 | EtOHnc1 | EtOHnc2 | Galnc1 | Galnc2 |
| 13        | YLR290C   | YPDcl2 | YPDcl3 | EtOHcl1 | EtOHcl2 | Galcl1 | YPDnc1 | YPDnc2 | YPDnc3 | YPDnc4 | EtOHnc1 | EtOHnc2 | Galnc1 | Galnc2 |
| 13 IMP4   | YNL075W   | YPDcl2 | YPDcl3 | EtOHcl1 | EtOHcl2 | Galcl1 | YPDnc1 | YPDnc2 | YPDnc3 | YPDnc4 | EtOHnc1 | EtOHnc2 | Galnc1 | Galnc2 |
| 13 DSL1   | YNL258C   | YPDcl2 | YPDcl3 | EtOHcl1 | EtOHcl2 | Galcl1 | YPDnc1 | YPDnc2 | YPDnc3 | YPDnc4 | EtOHnc1 | EtOHnc2 | Galnc1 | Galnc2 |
| 13 CIK1   | YMR198W   | YPDcl2 | YPDcl3 | EtOHcl1 | EtOHcl2 | Galcl1 | YPDnc1 | YPDnc2 | YPDnc3 | YPDnc4 | EtOHnc1 | EtOHnc2 | Galnc1 | Galnc2 |
| 13 GAR1   | YHR089C   | YPDcl2 | YPDcl3 | EtOHcl1 | EtOHcl2 | Galcl1 | YPDnc1 | YPDnc2 | YPDnc3 | YPDnc4 | EtOHnc1 | EtOHnc2 | Galnc1 | Galnc2 |
| 13 AIM4   | YBR194W   | YPDcl2 | YPDcl3 | EtOHcl1 | EtOHcl2 | Galcl1 | YPDnc1 | YPDnc2 | YPDnc3 | YPDnc4 | EtOHnc1 | EtOHnc2 | Galnc1 | Galnc2 |
| 13 AIM38  | YNR018W   | YPDcl2 | YPDcl3 | EtOHcl1 | EtOHcl2 | Galcl1 | YPDnc1 | YPDnc2 | YPDnc3 | YPDnc4 | EtOHnc1 | EtOHnc2 | Galnc1 | Galnc2 |
| 13 GCV3   | YAL044C   | YPDcl2 | YPDcl3 | EtOHcl1 | EtOHcl2 | Galcl1 | YPDnc1 | YPDnc2 | YPDnc3 | YPDnc4 | EtOHnc1 | EtOHnc2 | Galnc1 | Galnc2 |
| 13 PEX1   | YKL197C   | YPDcl2 | YPDcl3 | EtOHcl1 | EtOHcl2 | Galcl1 | YPDnc1 | YPDnc2 | YPDnc3 | YPDnc4 | EtOHnc1 | EtOHnc2 | Galnc1 | Galnc2 |
| 13 NAT5   | YOR253W   | YPDcl2 | YPDcl3 | EtOHcl1 | EtOHcl2 | Galcl1 | YPDnc1 | YPDnc2 | YPDnc3 | YPDnc4 | EtOHnc1 | EtOHnc2 | Galnc1 | Galnc2 |
| 13 SLM1   | YIL105C   | YPDcl2 | YPDcl3 | EtOHcl1 | EtOHcl2 | Galcl1 | YPDnc1 | YPDnc2 | YPDnc3 | YPDnc4 | EtOHnc1 | EtOHnc2 | Galnc1 | Galnc2 |
| 13 DIT1   | YDR403W   | YPDcl2 | YPDcl3 | EtOHcl1 | EtOHcl2 | Galcl1 | YPDnc1 | YPDnc2 | YPDnc3 | YPDnc4 | EtOHnc1 | EtOHnc2 | Galnc1 | Galnc2 |
| 13 ARP2   | YDL029W   | YPDcl2 | YPDcl3 | EtOHcl1 | EtOHcl2 | Galcl1 | YPDnc1 | YPDnc2 | YPDnc3 | YPDnc4 | EtOHnc1 | EtOHnc2 | Galnc1 | Galnc2 |
| 13 HBN1   | YCL026C-B | YPDcl2 | YPDcl3 | EtOHcl1 | EtOHcl2 | Galcl1 | YPDnc1 | YPDnc2 | YPDnc3 | YPDnc4 | EtOHnc1 | EtOHnc2 | Galnc1 | Galnc2 |
| 13        | YPR092W   | YPDcl2 | YPDcl3 | EtOHcl1 | EtOHcl2 | Galcl1 | YPDnc1 | YPDnc2 | YPDnc3 | YPDnc4 | EtOHnc1 | EtOHnc2 | Galnc1 | Galnc2 |
| 13 BBP1   | YPL255W   | YPDcl2 | YPDcl3 | EtOHcl1 | EtOHcl2 | Galcl1 | YPDnc1 | YPDnc2 | YPDnc3 | YPDnc4 | EtOHnc1 | EtOHnc2 | Galnc1 | Galnc2 |
| 13 SAP4   | YGL229C   | YPDcl2 | YPDcl3 | EtOHcl1 | EtOHcl2 | Galcl1 | YPDnc1 | YPDnc2 | YPDnc3 | YPDnc4 | EtOHnc1 | EtOHnc2 | Galnc1 | Galnc2 |
| 13 ICL1   | YER065C   | YPDcl2 | YPDcl3 | EtOHcl1 | EtOHcl2 | Galcl1 | YPDnc1 | YPDnc2 | YPDnc3 | YPDnc4 | EtOHnc1 | EtOHnc2 | Galnc1 | Galnc2 |
| 13 RPB11  | YOL005C   | YPDcl2 | YPDcl3 | EtOHcl1 | EtOHcl2 | Galcl1 | YPDnc1 | YPDnc2 | YPDnc3 | YPDnc4 | EtOHnc1 | EtOHnc2 | Galnc1 | Galnc2 |
| 13 SUR7   | YML052W   | YPDcl2 | YPDcl3 | EtOHcl1 | EtOHcl2 | Galcl1 | YPDnc1 | YPDnc2 | YPDnc3 | YPDnc4 | EtOHnc1 | EtOHnc2 | Galnc1 | Galnc2 |
| 13 APM2   | YHL019C   | YPDcl2 | YPDcl3 | EtOHcl1 | EtOHcl2 | Galcl1 | YPDnc1 | YPDnc2 | YPDnc3 | YPDnc4 | EtOHnc1 | EtOHnc2 | Galnc1 | Galnc2 |
| 13 POP7   | YBR167C   | YPDcl2 | YPDcl3 | EtOHcl1 | EtOHcl2 | Galcl1 | YPDnc1 | YPDnc2 | YPDnc3 | YPDnc4 | EtOHnc1 | EtOHnc2 | Galnc1 | Galnc2 |
| 13 SMC6   | YLR383W   | YPDcl2 | YPDcl3 | EtOHcl1 | EtOHcl2 | Galcl1 | YPDnc1 | YPDnc2 | YPDnc3 | YPDnc4 | EtOHnc1 | EtOHnc2 | Galnc1 | Galnc2 |
| 13 MTQ2   | YDR140W   | YPDcl2 | YPDcl3 | EtOHcl1 | EtOHcl2 | Galcl1 | YPDnc1 | YPDnc2 | YPDnc3 | YPDnc4 | EtOHnc1 | EtOHnc2 | Galnc1 | Galnc2 |
| 13 MRPL17 | YNL252C   | YPDcl2 | YPDcl3 | EtOHcl1 | EtOHcl2 | Galcl1 | YPDnc1 | YPDnc2 | YPDnc3 | YPDnc4 | EtOHnc1 | EtOHnc2 | Galnc1 | Galnc2 |
| 13 BGL2   | YGR282C   | YPDcl2 | YPDcl3 | EtOHcl1 | EtOHcl2 | Galcl1 | YPDnc1 | YPDnc2 | YPDnc3 | YPDnc4 | EtOHnc1 | EtOHnc2 | Galnc1 | Galnc2 |
| 13        | YMR196W   | YPDcl2 | YPDcl3 | EtOHcl1 | EtOHcl2 | Galcl1 | YPDnc1 | YPDnc2 | YPDnc3 | YPDnc4 | EtOHnc1 | EtOHnc2 | Galnc1 | Galnc2 |
| 13 GEP3   | YOR205C   | YPDcl2 | YPDcl3 | EtOHcl1 | EtOHcl2 | Galcl1 | YPDnc1 | YPDnc2 | YPDnc3 | YPDnc4 | EtOHnc1 | EtOHnc2 | Galnc1 | Galnc2 |
| 13 STB5   | YHR178W   | YPDcl2 | YPDcl3 | EtOHcl1 | EtOHcl2 | Galcl1 | YPDnc1 | YPDnc2 | YPDnc3 | YPDnc4 | EtOHnc1 | EtOHnc2 | Galnc1 | Galnc2 |
| 13 SLK19  | YOR195W   | YPDcl2 | YPDcl3 | EtOHcl1 | EtOHcl2 | Galcl1 | YPDnc1 | YPDnc2 | YPDnc3 | YPDnc4 | EtOHnc1 | EtOHnc2 | Galnc1 | Galnc2 |

|           |           |        |        |         |         |        |        |        |        |        |         |         |        |        |
|-----------|-----------|--------|--------|---------|---------|--------|--------|--------|--------|--------|---------|---------|--------|--------|
| 13 VEL1   | YGL258W   | YPDcl2 | YPDcl3 | EtOHcl1 | EtOHcl2 | Galcl1 | YPDnc1 | YPDnc2 | YPDnc3 | YPDnc4 | EtOHnc1 | EtOHnc2 | Galnc1 | Galnc2 |
| 13 INP51  | YIL002C   | YPDcl2 | YPDcl3 | EtOHcl1 | EtOHcl2 | Galcl1 | YPDnc1 | YPDnc2 | YPDnc3 | YPDnc4 | EtOHnc1 | EtOHnc2 | Galnc1 | Galnc2 |
| 13 ALY1   | YKR021W   | YPDcl2 | YPDcl3 | EtOHcl1 | EtOHcl2 | Galcl1 | YPDnc1 | YPDnc2 | YPDnc3 | YPDnc4 | EtOHnc1 | EtOHnc2 | Galnc1 | Galnc2 |
| 13 NMA1   | YLR328W   | YPDcl2 | YPDcl3 | EtOHcl1 | EtOHcl2 | Galcl1 | YPDnc1 | YPDnc2 | YPDnc3 | YPDnc4 | EtOHnc1 | EtOHnc2 | Galnc1 | Galnc2 |
| 13 SNU114 | YKL173W   | YPDcl2 | YPDcl3 | EtOHcl1 | EtOHcl2 | Galcl1 | YPDnc1 | YPDnc2 | YPDnc3 | YPDnc4 | EtOHnc1 | EtOHnc2 | Galnc1 | Galnc2 |
| 13 PHO91  | YNR013C   | YPDcl2 | YPDcl3 | EtOHcl1 | EtOHcl2 | Galcl1 | YPDnc1 | YPDnc2 | YPDnc3 | YPDnc4 | EtOHnc1 | EtOHnc2 | Galnc1 | Galnc2 |
| 13 MIR1   | YJR077C   | YPDcl2 | YPDcl3 | EtOHcl1 | EtOHcl2 | Galcl1 | YPDnc1 | YPDnc2 | YPDnc3 | YPDnc4 | EtOHnc1 | EtOHnc2 | Galnc1 | Galnc2 |
| 13        | YPR078C   | YPDcl2 | YPDcl3 | EtOHcl1 | EtOHcl2 | Galcl1 | YPDnc1 | YPDnc2 | YPDnc3 | YPDnc4 | EtOHnc1 | EtOHnc2 | Galnc1 | Galnc2 |
| 13 YKU70  | YMR284W   | YPDcl2 | YPDcl3 | EtOHcl1 | EtOHcl2 | Galcl1 | YPDnc1 | YPDnc2 | YPDnc3 | YPDnc4 | EtOHnc1 | EtOHnc2 | Galnc1 | Galnc2 |
| 13 PIF1   | YML061C   | YPDcl2 | YPDcl3 | EtOHcl1 | EtOHcl2 | Galcl1 | YPDnc1 | YPDnc2 | YPDnc3 | YPDnc4 | EtOHnc1 | EtOHnc2 | Galnc1 | Galnc2 |
| 13 FPR4   | YLR449W   | YPDcl2 | YPDcl3 | EtOHcl1 | EtOHcl2 | Galcl1 | YPDnc1 | YPDnc2 | YPDnc3 | YPDnc4 | EtOHnc1 | EtOHnc2 | Galnc1 | Galnc2 |
| 13 RPT2   | YDL007W   | YPDcl2 | YPDcl3 | EtOHcl1 | EtOHcl2 | Galcl1 | YPDnc1 | YPDnc2 | YPDnc3 | YPDnc4 | EtOHnc1 | EtOHnc2 | Galnc1 | Galnc2 |
| 13 PNO1   | YOR145C   | YPDcl2 | YPDcl3 | EtOHcl1 | EtOHcl2 | Galcl1 | YPDnc1 | YPDnc2 | YPDnc3 | YPDnc4 | EtOHnc1 | EtOHnc2 | Galnc1 | Galnc2 |
| 13        | YMR317W   | YPDcl2 | YPDcl3 | EtOHcl1 | EtOHcl2 | Galcl1 | YPDnc1 | YPDnc2 | YPDnc3 | YPDnc4 | EtOHnc1 | EtOHnc2 | Galnc1 | Galnc2 |
| 13 MET1   | YKR069W   | YPDcl2 | YPDcl3 | EtOHcl1 | EtOHcl2 | Galcl1 | YPDnc1 | YPDnc2 | YPDnc3 | YPDnc4 | EtOHnc1 | EtOHnc2 | Galnc1 | Galnc2 |
| 13        | YOR287C   | YPDcl2 | YPDcl3 | EtOHcl1 | EtOHcl2 | Galcl1 | YPDnc1 | YPDnc2 | YPDnc3 | YPDnc4 | EtOHnc1 | EtOHnc2 | Galnc1 | Galnc2 |
| 13        | YHR071C-A | YPDcl2 | YPDcl3 | EtOHcl1 | EtOHcl2 | Galcl1 | YPDnc1 | YPDnc2 | YPDnc3 | YPDnc4 | EtOHnc1 | EtOHnc2 | Galnc1 | Galnc2 |
| 13 SAR1   | YPL218W   | YPDcl2 | YPDcl3 | EtOHcl1 | EtOHcl2 | Galcl1 | YPDnc1 | YPDnc2 | YPDnc3 | YPDnc4 | EtOHnc1 | EtOHnc2 | Galnc1 | Galnc2 |
| 13        | YJR149W   | YPDcl2 | YPDcl3 | EtOHcl1 | EtOHcl2 | Galcl1 | YPDnc1 | YPDnc2 | YPDnc3 | YPDnc4 | EtOHnc1 | EtOHnc2 | Galnc1 | Galnc2 |
| 13 SFH5   | YJL145W   | YPDcl2 | YPDcl3 | EtOHcl1 | EtOHcl2 | Galcl1 | YPDnc1 | YPDnc2 | YPDnc3 | YPDnc4 | EtOHnc1 | EtOHnc2 | Galnc1 | Galnc2 |
| 13 SFB3   | YHR098C   | YPDcl2 | YPDcl3 | EtOHcl1 | EtOHcl2 | Galcl1 | YPDnc1 | YPDnc2 | YPDnc3 | YPDnc4 | EtOHnc1 | EtOHnc2 | Galnc1 | Galnc2 |
| 13 ESA1   | YOR244W   | YPDcl2 | YPDcl3 | EtOHcl1 | EtOHcl2 | Galcl1 | YPDnc1 | YPDnc2 | YPDnc3 | YPDnc4 | EtOHnc1 | EtOHnc2 | Galnc1 | Galnc2 |
| 13        | YLR173W   | YPDcl2 | YPDcl3 | EtOHcl1 | EtOHcl2 | Galcl1 | YPDnc1 | YPDnc2 | YPDnc3 | YPDnc4 | EtOHnc1 | EtOHnc2 | Galnc1 | Galnc2 |
| 13 ERG9   | YHR190W   | YPDcl2 | YPDcl3 | EtOHcl1 | EtOHcl2 | Galcl1 | YPDnc1 | YPDnc2 | YPDnc3 | YPDnc4 | EtOHnc1 | EtOHnc2 | Galnc1 | Galnc2 |
| 13 MSY1   | YPL097W   | YPDcl2 | YPDcl3 | EtOHcl1 | EtOHcl2 | Galcl1 | YPDnc1 | YPDnc2 | YPDnc3 | YPDnc4 | EtOHnc1 | EtOHnc2 | Galnc1 | Galnc2 |
| 13        | YNL115C   | YPDcl2 | YPDcl3 | EtOHcl1 | EtOHcl2 | Galcl1 | YPDnc1 | YPDnc2 | YPDnc3 | YPDnc4 | EtOHnc1 | EtOHnc2 | Galnc1 | Galnc2 |
| 13 CDC45  | YLR103C   | YPDcl2 | YPDcl3 | EtOHcl1 | EtOHcl2 | Galcl1 | YPDnc1 | YPDnc2 | YPDnc3 | YPDnc4 | EtOHnc1 | EtOHnc2 | Galnc1 | Galnc2 |
| 13 CYC8   | YBR112C   | YPDcl2 | YPDcl3 | EtOHcl1 | EtOHcl2 | Galcl1 | YPDnc1 | YPDnc2 | YPDnc3 | YPDnc4 | EtOHnc1 | EtOHnc2 | Galnc1 | Galnc2 |
| 13        | YLR123C   | YPDcl2 | YPDcl3 | EtOHcl1 | EtOHcl2 | Galcl1 | YPDnc1 | YPDnc2 | YPDnc3 | YPDnc4 | EtOHnc1 | EtOHnc2 | Galnc1 | Galnc2 |
| 13 BUD25  | YER014C-A | YPDcl2 | YPDcl3 | EtOHcl1 | EtOHcl2 | Galcl1 | YPDnc1 | YPDnc2 | YPDnc3 | YPDnc4 | EtOHnc1 | EtOHnc2 | Galnc1 | Galnc2 |
| 13 COX8   | YLR395C   | YPDcl2 | YPDcl3 | EtOHcl1 | EtOHcl2 | Galcl1 | YPDnc1 | YPDnc2 | YPDnc3 | YPDnc4 | EtOHnc1 | EtOHnc2 | Galnc1 | Galnc2 |
| 13 RPL42B | YHR141C   | YPDcl2 | YPDcl3 | EtOHcl1 | EtOHcl2 | Galcl1 | YPDnc1 | YPDnc2 | YPDnc3 | YPDnc4 | EtOHnc1 | EtOHnc2 | Galnc1 | Galnc2 |
| 13 SAS3   | YBL052C   | YPDcl2 | YPDcl3 | EtOHcl1 | EtOHcl2 | Galcl1 | YPDnc1 | YPDnc2 | YPDnc3 | YPDnc4 | EtOHnc1 | EtOHnc2 | Galnc1 | Galnc2 |
| 13 EMC1   | YCL045C   | YPDcl2 | YPDcl3 | EtOHcl1 | EtOHcl2 | Galcl1 | YPDnc1 | YPDnc2 | YPDnc3 | YPDnc4 | EtOHnc1 | EtOHnc2 | Galnc1 | Galnc2 |

|           |           |        |        |         |         |        |        |        |        |        |         |         |        |        |
|-----------|-----------|--------|--------|---------|---------|--------|--------|--------|--------|--------|---------|---------|--------|--------|
| 13        | YNL011C   | YPDcl2 | YPDcl3 | EtOHcl1 | EtOHcl2 | Galcl1 | YPDnc1 | YPDnc2 | YPDnc3 | YPDnc4 | EtOHnc1 | EtOHnc2 | Galnc1 | Galnc2 |
| 13 BCH1   | YMR237W   | YPDcl2 | YPDcl3 | EtOHcl1 | EtOHcl2 | Galcl1 | YPDnc1 | YPDnc2 | YPDnc3 | YPDnc4 | EtOHnc1 | EtOHnc2 | Galnc1 | Galnc2 |
| 13 RPS0A  | YGR214W   | YPDcl2 | YPDcl3 | EtOHcl1 | EtOHcl2 | Galcl1 | YPDnc1 | YPDnc2 | YPDnc3 | YPDnc4 | EtOHnc1 | EtOHnc2 | Galnc1 | Galnc2 |
| 13        | YIR021W-A | YPDcl2 | YPDcl3 | EtOHcl1 | EtOHcl2 | Galcl1 | YPDnc1 | YPDnc2 | YPDnc3 | YPDnc4 | EtOHnc1 | EtOHnc2 | Galnc1 | Galnc2 |
| 13 TAM41  | YGR046W   | YPDcl2 | YPDcl3 | EtOHcl1 | EtOHcl2 | Galcl1 | YPDnc1 | YPDnc2 | YPDnc3 | YPDnc4 | EtOHnc1 | EtOHnc2 | Galnc1 | Galnc2 |
| 13 AZR1   | YGR224W   | YPDcl2 | YPDcl3 | EtOHcl1 | EtOHcl2 | Galcl1 | YPDnc1 | YPDnc2 | YPDnc3 | YPDnc4 | EtOHnc1 | EtOHnc2 | Galnc1 | Galnc2 |
| 13        | YMR130W   | YPDcl2 | YPDcl3 | EtOHcl1 | EtOHcl2 | Galcl1 | YPDnc1 | YPDnc2 | YPDnc3 | YPDnc4 | EtOHnc1 | EtOHnc2 | Galnc1 | Galnc2 |
| 13 CAF4   | YKR036C   | YPDcl2 | YPDcl3 | EtOHcl1 | EtOHcl2 | Galcl1 | YPDnc1 | YPDnc2 | YPDnc3 | YPDnc4 | EtOHnc1 | EtOHnc2 | Galnc1 | Galnc2 |
| 13        | YIR030W-A | YPDcl2 | YPDcl3 | EtOHcl1 | EtOHcl2 | Galcl1 | YPDnc1 | YPDnc2 | YPDnc3 | YPDnc4 | EtOHnc1 | EtOHnc2 | Galnc1 | Galnc2 |
| 13        | YIL047C-A | YPDcl2 | YPDcl3 | EtOHcl1 | EtOHcl2 | Galcl1 | YPDnc1 | YPDnc2 | YPDnc3 | YPDnc4 | EtOHnc1 | EtOHnc2 | Galnc1 | Galnc2 |
| 13 PDX3   | YBR035C   | YPDcl2 | YPDcl3 | EtOHcl1 | EtOHcl2 | Galcl1 | YPDnc1 | YPDnc2 | YPDnc3 | YPDnc4 | EtOHnc1 | EtOHnc2 | Galnc1 | Galnc2 |
| 13 PEX5   | YDR244W   | YPDcl2 | YPDcl3 | EtOHcl1 | EtOHcl2 | Galcl1 | YPDnc1 | YPDnc2 | YPDnc3 | YPDnc4 | EtOHnc1 | EtOHnc2 | Galnc1 | Galnc2 |
| 13 ASR1   | YPR093C   | YPDcl2 | YPDcl3 | EtOHcl1 | EtOHcl2 | Galcl1 | YPDnc1 | YPDnc2 | YPDnc3 | YPDnc4 | EtOHnc1 | EtOHnc2 | Galnc1 | Galnc2 |
| 13 RNT1   | YMR239C   | YPDcl2 | YPDcl3 | EtOHcl1 | EtOHcl2 | Galcl1 | YPDnc1 | YPDnc2 | YPDnc3 | YPDnc4 | EtOHnc1 | EtOHnc2 | Galnc1 | Galnc2 |
| 13 MAS1   | YLR163C   | YPDcl2 | YPDcl3 | EtOHcl1 | EtOHcl2 | Galcl1 | YPDnc1 | YPDnc2 | YPDnc3 | YPDnc4 | EtOHnc1 | EtOHnc2 | Galnc1 | Galnc2 |
| 13 NBL1   | YHR199C-A | YPDcl2 | YPDcl3 | EtOHcl1 | EtOHcl2 | Galcl1 | YPDnc1 | YPDnc2 | YPDnc3 | YPDnc4 | EtOHnc1 | EtOHnc2 | Galnc1 | Galnc2 |
| 13 PCL6   | YER059W   | YPDcl2 | YPDcl3 | EtOHcl1 | EtOHcl2 | Galcl1 | YPDnc1 | YPDnc2 | YPDnc3 | YPDnc4 | EtOHnc1 | EtOHnc2 | Galnc1 | Galnc2 |
| 13 FTH1   | YBR207W   | YPDcl2 | YPDcl3 | EtOHcl1 | EtOHcl2 | Galcl1 | YPDnc1 | YPDnc2 | YPDnc3 | YPDnc4 | EtOHnc1 | EtOHnc2 | Galnc1 | Galnc2 |
| 13 DFG10  | YIL049W   | YPDcl2 | YPDcl3 | EtOHcl1 | EtOHcl2 | Galcl1 | YPDnc1 | YPDnc2 | YPDnc3 | YPDnc4 | EtOHnc1 | EtOHnc2 | Galnc1 | Galnc2 |
| 13 RPL6A  | YML073C   | YPDcl2 | YPDcl3 | EtOHcl1 | EtOHcl2 | Galcl1 | YPDnc1 | YPDnc2 | YPDnc3 | YPDnc4 | EtOHnc1 | EtOHnc2 | Galnc1 | Galnc2 |
| 13 RAX2   | YLR084C   | YPDcl2 | YPDcl3 | EtOHcl1 | EtOHcl2 | Galcl1 | YPDnc1 | YPDnc2 | YPDnc3 | YPDnc4 | EtOHnc1 | EtOHnc2 | Galnc1 | Galnc2 |
| 13 UBA3   | YPR066W   | YPDcl2 | YPDcl3 | EtOHcl1 | EtOHcl2 | Galcl1 | YPDnc1 | YPDnc2 | YPDnc3 | YPDnc4 | EtOHnc1 | EtOHnc2 | Galnc1 | Galnc2 |
| 13        | YOR161C-C | YPDcl2 | YPDcl3 | EtOHcl1 | EtOHcl2 | Galcl1 | YPDnc1 | YPDnc2 | YPDnc3 | YPDnc4 | EtOHnc1 | EtOHnc2 | Galnc1 | Galnc2 |
| 13 UBC13  | YDR092W   | YPDcl2 | YPDcl3 | EtOHcl1 | EtOHcl2 | Galcl1 | YPDnc1 | YPDnc2 | YPDnc3 | YPDnc4 | EtOHnc1 | EtOHnc2 | Galnc1 | Galnc2 |
| 13 DIA2   | YOR080W   | YPDcl2 | YPDcl3 | EtOHcl1 | EtOHcl2 | Galcl1 | YPDnc1 | YPDnc2 | YPDnc3 | YPDnc4 | EtOHnc1 | EtOHnc2 | Galnc1 | Galnc2 |
| 13 PEP8   | YJL053W   | YPDcl2 | YPDcl3 | EtOHcl1 | EtOHcl2 | Galcl1 | YPDnc1 | YPDnc2 | YPDnc3 | YPDnc4 | EtOHnc1 | EtOHnc2 | Galnc1 | Galnc2 |
| 13 FYV10  | YIL097W   | YPDcl2 | YPDcl3 | EtOHcl1 | EtOHcl2 | Galcl1 | YPDnc1 | YPDnc2 | YPDnc3 | YPDnc4 | EtOHnc1 | EtOHnc2 | Galnc1 | Galnc2 |
| 13        | YNR025C   | YPDcl2 | YPDcl3 | EtOHcl1 | EtOHcl2 | Galcl1 | YPDnc1 | YPDnc2 | YPDnc3 | YPDnc4 | EtOHnc1 | EtOHnc2 | Galnc1 | Galnc2 |
| 13 PPR1   | YLR014C   | YPDcl2 | YPDcl3 | EtOHcl1 | EtOHcl2 | Galcl1 | YPDnc1 | YPDnc2 | YPDnc3 | YPDnc4 | EtOHnc1 | EtOHnc2 | Galnc1 | Galnc2 |
| 13 AVT4   | YNL101W   | YPDcl2 | YPDcl3 | EtOHcl1 | EtOHcl2 | Galcl1 | YPDnc1 | YPDnc2 | YPDnc3 | YPDnc4 | EtOHnc1 | EtOHnc2 | Galnc1 | Galnc2 |
| 13 KAP114 | YGL241W   | YPDcl2 | YPDcl3 | EtOHcl1 | EtOHcl2 | Galcl1 | YPDnc1 | YPDnc2 | YPDnc3 | YPDnc4 | EtOHnc1 | EtOHnc2 | Galnc1 | Galnc2 |
| 13 RPC10  | YHR143W-  | YPDcl2 | YPDcl3 | EtOHcl1 | EtOHcl2 | Galcl1 | YPDnc1 | YPDnc2 | YPDnc3 | YPDnc4 | EtOHnc1 | EtOHnc2 | Galnc1 | Galnc2 |
| 13 COF1   | YLL050C   | YPDcl2 | YPDcl3 | EtOHcl1 | EtOHcl2 | Galcl1 | YPDnc1 | YPDnc2 | YPDnc3 | YPDnc4 | EtOHnc1 | EtOHnc2 | Galnc1 | Galnc2 |
| 13 PEX4   | YGR133W   | YPDcl2 | YPDcl3 | EtOHcl1 | EtOHcl2 | Galcl1 | YPDnc1 | YPDnc2 | YPDnc3 | YPDnc4 | EtOHnc1 | EtOHnc2 | Galnc1 | Galnc2 |



|    |        |           |        |        |         |         |        |        |        |        |        |         |         |        |        |
|----|--------|-----------|--------|--------|---------|---------|--------|--------|--------|--------|--------|---------|---------|--------|--------|
| 13 | SOK1   | YDR006C   | YPDcl2 | YPDcl3 | EtOHcl1 | EtOHcl2 | Galcl1 | YPDnc1 | YPDnc2 | YPDnc3 | YPDnc4 | EtOHnc1 | EtOHnc2 | Galnc1 | Galnc2 |
| 13 | FOL1   | YNL256W   | YPDcl2 | YPDcl3 | EtOHcl1 | EtOHcl2 | Galcl1 | YPDnc1 | YPDnc2 | YPDnc3 | YPDnc4 | EtOHnc1 | EtOHnc2 | Galnc1 | Galnc2 |
| 13 | UBP9   | YER098W   | YPDcl2 | YPDcl3 | EtOHcl1 | EtOHcl2 | Galcl1 | YPDnc1 | YPDnc2 | YPDnc3 | YPDnc4 | EtOHnc1 | EtOHnc2 | Galnc1 | Galnc2 |
| 13 |        | YDR401W   | YPDcl2 | YPDcl3 | EtOHcl1 | EtOHcl2 | Galcl1 | YPDnc1 | YPDnc2 | YPDnc3 | YPDnc4 | EtOHnc1 | EtOHnc2 | Galnc1 | Galnc2 |
| 13 | FIG4   | YNL325C   | YPDcl2 | YPDcl3 | EtOHcl1 | EtOHcl2 | Galcl1 | YPDnc1 | YPDnc2 | YPDnc3 | YPDnc4 | EtOHnc1 | EtOHnc2 | Galnc1 | Galnc2 |
| 13 |        | YGL204C   | YPDcl2 | YPDcl3 | EtOHcl1 | EtOHcl2 | Galcl1 | YPDnc1 | YPDnc2 | YPDnc3 | YPDnc4 | EtOHnc1 | EtOHnc2 | Galnc1 | Galnc2 |
| 13 | ATG14  | YBR128C   | YPDcl2 | YPDcl3 | EtOHcl1 | EtOHcl2 | Galcl1 | YPDnc1 | YPDnc2 | YPDnc3 | YPDnc4 | EtOHnc1 | EtOHnc2 | Galnc1 | Galnc2 |
| 13 | HUR1   | YGL168W   | YPDcl2 | YPDcl3 | EtOHcl1 | EtOHcl2 | Galcl1 | YPDnc1 | YPDnc2 | YPDnc3 | YPDnc4 | EtOHnc1 | EtOHnc2 | Galnc1 | Galnc2 |
| 13 | IRC4   | YDR540C   | YPDcl2 | YPDcl3 | EtOHcl1 | EtOHcl2 | Galcl1 | YPDnc1 | YPDnc2 | YPDnc3 | YPDnc4 | EtOHnc1 | EtOHnc2 | Galnc1 | Galnc2 |
| 13 | RAP1   | YNL216W   | YPDcl2 | YPDcl3 | EtOHcl1 | EtOHcl2 | Galcl1 | YPDnc1 | YPDnc2 | YPDnc3 | YPDnc4 | EtOHnc1 | EtOHnc2 | Galnc1 | Galnc2 |
| 13 |        | YJL215C   | YPDcl2 | YPDcl3 | EtOHcl1 | EtOHcl2 | Galcl1 | YPDnc1 | YPDnc2 | YPDnc3 | YPDnc4 | EtOHnc1 | EtOHnc2 | Galnc1 | Galnc2 |
| 13 |        | YOR282W   | YPDcl2 | YPDcl3 | EtOHcl1 | EtOHcl2 | Galcl1 | YPDnc1 | YPDnc2 | YPDnc3 | YPDnc4 | EtOHnc1 | EtOHnc2 | Galnc1 | Galnc2 |
| 13 | ERI1   | YPL096C-A | YPDcl2 | YPDcl3 | EtOHcl1 | EtOHcl2 | Galcl1 | YPDnc1 | YPDnc2 | YPDnc3 | YPDnc4 | EtOHnc1 | EtOHnc2 | Galnc1 | Galnc2 |
| 13 |        | YML119W   | YPDcl2 | YPDcl3 | EtOHcl1 | EtOHcl2 | Galcl1 | YPDnc1 | YPDnc2 | YPDnc3 | YPDnc4 | EtOHnc1 | EtOHnc2 | Galnc1 | Galnc2 |
| 13 | SAM4   | YPL273W   | YPDcl2 | YPDcl3 | EtOHcl1 | EtOHcl2 | Galcl1 | YPDnc1 | YPDnc2 | YPDnc3 | YPDnc4 | EtOHnc1 | EtOHnc2 | Galnc1 | Galnc2 |
| 13 |        | YLR046C   | YPDcl2 | YPDcl3 | EtOHcl1 | EtOHcl2 | Galcl1 | YPDnc1 | YPDnc2 | YPDnc3 | YPDnc4 | EtOHnc1 | EtOHnc2 | Galnc1 | Galnc2 |
| 13 |        | YFL019C   | YPDcl2 | YPDcl3 | EtOHcl1 | EtOHcl2 | Galcl1 | YPDnc1 | YPDnc2 | YPDnc3 | YPDnc4 | EtOHnc1 | EtOHnc2 | Galnc1 | Galnc2 |
| 13 | MRPL20 | YKR085C   | YPDcl2 | YPDcl3 | EtOHcl1 | EtOHcl2 | Galcl1 | YPDnc1 | YPDnc2 | YPDnc3 | YPDnc4 | EtOHnc1 | EtOHnc2 | Galnc1 | Galnc2 |
| 13 | TIF5   | YPR041W   | YPDcl2 | YPDcl3 | EtOHcl1 | EtOHcl2 | Galcl1 | YPDnc1 | YPDnc2 | YPDnc3 | YPDnc4 | EtOHnc1 | EtOHnc2 | Galnc1 | Galnc2 |
| 13 | ATG7   | YHR171W   | YPDcl2 | YPDcl3 | EtOHcl1 | EtOHcl2 | Galcl1 | YPDnc1 | YPDnc2 | YPDnc3 | YPDnc4 | EtOHnc1 | EtOHnc2 | Galnc1 | Galnc2 |
| 13 | FCF2   | YLR051C   | YPDcl2 | YPDcl3 | EtOHcl1 | EtOHcl2 | Galcl1 | YPDnc1 | YPDnc2 | YPDnc3 | YPDnc4 | EtOHnc1 | EtOHnc2 | Galnc1 | Galnc2 |
| 13 | IDH2   | YOR136W   | YPDcl2 | YPDcl3 | EtOHcl1 | EtOHcl2 | Galcl1 | YPDnc1 | YPDnc2 | YPDnc3 | YPDnc4 | EtOHnc1 | EtOHnc2 | Galnc1 | Galnc2 |
| 13 |        | YPR016W-  | YPDcl2 | YPDcl3 | EtOHcl1 | EtOHcl2 | Galcl1 | YPDnc1 | YPDnc2 | YPDnc3 | YPDnc4 | EtOHnc1 | EtOHnc2 | Galnc1 | Galnc2 |
| 13 | GRX8   | YLR364W   | YPDcl2 | YPDcl3 | EtOHcl1 | EtOHcl2 | Galcl1 | YPDnc1 | YPDnc2 | YPDnc3 | YPDnc4 | EtOHnc1 | EtOHnc2 | Galnc1 | Galnc2 |
| 13 | VAC7   | YNL054W   | YPDcl2 | YPDcl3 | EtOHcl1 | EtOHcl2 | Galcl1 | YPDnc1 | YPDnc2 | YPDnc3 | YPDnc4 | EtOHnc1 | EtOHnc2 | Galnc1 | Galnc2 |
| 13 | IFM1   | YOL023W   | YPDcl2 | YPDcl3 | EtOHcl1 | EtOHcl2 | Galcl1 | YPDnc1 | YPDnc2 | YPDnc3 | YPDnc4 | EtOHnc1 | EtOHnc2 | Galnc1 | Galnc2 |
| 13 | AAD15  | YOL165C   | YPDcl2 | YPDcl3 | EtOHcl1 | EtOHcl2 | Galcl1 | YPDnc1 | YPDnc2 | YPDnc3 | YPDnc4 | EtOHnc1 | EtOHnc2 | Galnc1 | Galnc2 |
| 13 | MTR2   | YKL186C   | YPDcl2 | YPDcl3 | EtOHcl1 | EtOHcl2 | Galcl1 | YPDnc1 | YPDnc2 | YPDnc3 | YPDnc4 | EtOHnc1 | EtOHnc2 | Galnc1 | Galnc2 |
| 13 | GTB1   | YDR221W   | YPDcl2 | YPDcl3 | EtOHcl1 | EtOHcl2 | Galcl1 | YPDnc1 | YPDnc2 | YPDnc3 | YPDnc4 | EtOHnc1 | EtOHnc2 | Galnc1 | Galnc2 |
| 13 | MES1   | YGR264C   | YPDcl2 | YPDcl3 | EtOHcl1 | EtOHcl2 | Galcl1 | YPDnc1 | YPDnc2 | YPDnc3 | YPDnc4 | EtOHnc1 | EtOHnc2 | Galnc1 | Galnc2 |
| 13 | RPL41A | YDL184C   | YPDcl2 | YPDcl3 | EtOHcl1 | EtOHcl2 | Galcl1 | YPDnc1 | YPDnc2 | YPDnc3 | YPDnc4 | EtOHnc1 | EtOHnc2 | Galnc1 | Galnc2 |
| 13 | PTK1   | YKL198C   | YPDcl2 | YPDcl3 | EtOHcl1 | EtOHcl2 | Galcl1 | YPDnc1 | YPDnc2 | YPDnc3 | YPDnc4 | EtOHnc1 | EtOHnc2 | Galnc1 | Galnc2 |
| 13 | EBS1   | YDR206W   | YPDcl2 | YPDcl3 | EtOHcl1 | EtOHcl2 | Galcl1 | YPDnc1 | YPDnc2 | YPDnc3 | YPDnc4 | EtOHnc1 | EtOHnc2 | Galnc1 | Galnc2 |
| 13 |        | YLR112W   | YPDcl2 | YPDcl3 | EtOHcl1 | EtOHcl2 | Galcl1 | YPDnc1 | YPDnc2 | YPDnc3 | YPDnc4 | EtOHnc1 | EtOHnc2 | Galnc1 | Galnc2 |

|          |           |        |        |         |         |        |        |        |        |        |         |         |        |        |
|----------|-----------|--------|--------|---------|---------|--------|--------|--------|--------|--------|---------|---------|--------|--------|
| 13 APL3  | YBL037W   | YPDcl2 | YPDcl3 | EtOHcl1 | EtOHcl2 | Galcl1 | YPDnc1 | YPDnc2 | YPDnc3 | YPDnc4 | EtOHnc1 | EtOHnc2 | Galnc1 | Galnc2 |
| 13 DAL5  | YJR152W   | YPDcl2 | YPDcl3 | EtOHcl1 | EtOHcl2 | Galcl1 | YPDnc1 | YPDnc2 | YPDnc3 | YPDnc4 | EtOHnc1 | EtOHnc2 | Galnc1 | Galnc2 |
| 13       | YBL083C   | YPDcl2 | YPDcl3 | EtOHcl1 | EtOHcl2 | Galcl1 | YPDnc1 | YPDnc2 | YPDnc3 | YPDnc4 | EtOHnc1 | EtOHnc2 | Galnc1 | Galnc2 |
| 13       | YBR191W-  | YPDcl2 | YPDcl3 | EtOHcl1 | EtOHcl2 | Galcl1 | YPDnc1 | YPDnc2 | YPDnc3 | YPDnc4 | EtOHnc1 | EtOHnc2 | Galnc1 | Galnc2 |
| 13       | YER068C-A | YPDcl2 | YPDcl3 | EtOHcl1 | EtOHcl2 | Galcl1 | YPDnc1 | YPDnc2 | YPDnc3 | YPDnc4 | EtOHnc1 | EtOHnc2 | Galnc1 | Galnc2 |
| 13 AAT1  | YKL106W   | YPDcl2 | YPDcl3 | EtOHcl1 | EtOHcl2 | Galcl1 | YPDnc1 | YPDnc2 | YPDnc3 | YPDnc4 | EtOHnc1 | EtOHnc2 | Galnc1 | Galnc2 |
| 13 DUG2  | YBR281C   | YPDcl2 | YPDcl3 | EtOHcl1 | EtOHcl2 | Galcl1 | YPDnc1 | YPDnc2 | YPDnc3 | YPDnc4 | EtOHnc1 | EtOHnc2 | Galnc1 | Galnc2 |
| 13 DNM1  | YLL001W   | YPDcl2 | YPDcl3 | EtOHcl1 | EtOHcl2 | Galcl1 | YPDnc1 | YPDnc2 | YPDnc3 | YPDnc4 | EtOHnc1 | EtOHnc2 | Galnc1 | Galnc2 |
| 13 RPC53 | YDL150W   | YPDcl2 | YPDcl3 | EtOHcl1 | EtOHcl2 | Galcl1 | YPDnc1 | YPDnc2 | YPDnc3 | YPDnc4 | EtOHnc1 | EtOHnc2 | Galnc1 | Galnc2 |
| 13 PFK27 | YOL136C   | YPDcl2 | YPDcl3 | EtOHcl1 | EtOHcl2 | Galcl1 | YPDnc1 | YPDnc2 | YPDnc3 | YPDnc4 | EtOHnc1 | EtOHnc2 | Galnc1 | Galnc2 |
| 13 FMP41 | YNL168C   | YPDcl2 | YPDcl3 | EtOHcl1 | EtOHcl2 | Galcl1 | YPDnc1 | YPDnc2 | YPDnc3 | YPDnc4 | EtOHnc1 | EtOHnc2 | Galnc1 | Galnc2 |
| 13       | YIL077C   | YPDcl2 | YPDcl3 | EtOHcl1 | EtOHcl2 | Galcl1 | YPDnc1 | YPDnc2 | YPDnc3 | YPDnc4 | EtOHnc1 | EtOHnc2 | Galnc1 | Galnc2 |
| 13 SPO14 | YKR031C   | YPDcl2 | YPDcl3 | EtOHcl1 | EtOHcl2 | Galcl1 | YPDnc1 | YPDnc2 | YPDnc3 | YPDnc4 | EtOHnc1 | EtOHnc2 | Galnc1 | Galnc2 |
| 13 DIM1  | YPL266W   | YPDcl2 | YPDcl3 | EtOHcl1 | EtOHcl2 | Galcl1 | YPDnc1 | YPDnc2 | YPDnc3 | YPDnc4 | EtOHnc1 | EtOHnc2 | Galnc1 | Galnc2 |
| 13 ECM14 | YHR132C   | YPDcl2 | YPDcl3 | EtOHcl1 | EtOHcl2 | Galcl1 | YPDnc1 | YPDnc2 | YPDnc3 | YPDnc4 | EtOHnc1 | EtOHnc2 | Galnc1 | Galnc2 |
| 13 SGD1  | YLR336C   | YPDcl2 | YPDcl3 | EtOHcl1 | EtOHcl2 | Galcl1 | YPDnc1 | YPDnc2 | YPDnc3 | YPDnc4 | EtOHnc1 | EtOHnc2 | Galnc1 | Galnc2 |
| 13 SPR6  | YER115C   | YPDcl2 | YPDcl3 | EtOHcl1 | EtOHcl2 | Galcl1 | YPDnc1 | YPDnc2 | YPDnc3 | YPDnc4 | EtOHnc1 | EtOHnc2 | Galnc1 | Galnc2 |
| 13 YLF2  | YHL014C   | YPDcl2 | YPDcl3 | EtOHcl1 | EtOHcl2 | Galcl1 | YPDnc1 | YPDnc2 | YPDnc3 | YPDnc4 | EtOHnc1 | EtOHnc2 | Galnc1 | Galnc2 |
| 13 ELP6  | YMR312W   | YPDcl2 | YPDcl3 | EtOHcl1 | EtOHcl2 | Galcl1 | YPDnc1 | YPDnc2 | YPDnc3 | YPDnc4 | EtOHnc1 | EtOHnc2 | Galnc1 | Galnc2 |
| 13 MSS11 | YMR164C   | YPDcl2 | YPDcl3 | EtOHcl1 | EtOHcl2 | Galcl1 | YPDnc1 | YPDnc2 | YPDnc3 | YPDnc4 | EtOHnc1 | EtOHnc2 | Galnc1 | Galnc2 |
| 13       | YOR214C   | YPDcl2 | YPDcl3 | EtOHcl1 | EtOHcl2 | Galcl1 | YPDnc1 | YPDnc2 | YPDnc3 | YPDnc4 | EtOHnc1 | EtOHnc2 | Galnc1 | Galnc2 |
| 13 RRN5  | YLR141W   | YPDcl2 | YPDcl3 | EtOHcl1 | EtOHcl2 | Galcl1 | YPDnc1 | YPDnc2 | YPDnc3 | YPDnc4 | EtOHnc1 | EtOHnc2 | Galnc1 | Galnc2 |
| 13 MAD2  | YJL030W   | YPDcl2 | YPDcl3 | EtOHcl1 | EtOHcl2 | Galcl1 | YPDnc1 | YPDnc2 | YPDnc3 | YPDnc4 | EtOHnc1 | EtOHnc2 | Galnc1 | Galnc2 |
| 13       | YJR096W   | YPDcl2 | YPDcl3 | EtOHcl1 | EtOHcl2 | Galcl1 | YPDnc1 | YPDnc2 | YPDnc3 | YPDnc4 | EtOHnc1 | EtOHnc2 | Galnc1 | Galnc2 |
| 13 SEC20 | YDR498C   | YPDcl2 | YPDcl3 | EtOHcl1 | EtOHcl2 | Galcl1 | YPDnc1 | YPDnc2 | YPDnc3 | YPDnc4 | EtOHnc1 | EtOHnc2 | Galnc1 | Galnc2 |
| 13 STE14 | YDR410C   | YPDcl2 | YPDcl3 | EtOHcl1 | EtOHcl2 | Galcl1 | YPDnc1 | YPDnc2 | YPDnc3 | YPDnc4 | EtOHnc1 | EtOHnc2 | Galnc1 | Galnc2 |
| 13 ALA1  | YOR335C   | YPDcl2 | YPDcl3 | EtOHcl1 | EtOHcl2 | Galcl1 | YPDnc1 | YPDnc2 | YPDnc3 | YPDnc4 | EtOHnc1 | EtOHnc2 | Galnc1 | Galnc2 |
| 13 TCB2  | YNL087W   | YPDcl2 | YPDcl3 | EtOHcl1 | EtOHcl2 | Galcl1 | YPDnc1 | YPDnc2 | YPDnc3 | YPDnc4 | EtOHnc1 | EtOHnc2 | Galnc1 | Galnc2 |
| 13 MIP6  | YHR015W   | YPDcl2 | YPDcl3 | EtOHcl1 | EtOHcl2 | Galcl1 | YPDnc1 | YPDnc2 | YPDnc3 | YPDnc4 | EtOHnc1 | EtOHnc2 | Galnc1 | Galnc2 |
| 13 PNC1  | YGL037C   | YPDcl2 | YPDcl3 | EtOHcl1 | EtOHcl2 | Galcl1 | YPDnc1 | YPDnc2 | YPDnc3 | YPDnc4 | EtOHnc1 | EtOHnc2 | Galnc1 | Galnc2 |
| 13 SAM2  | YDR502C   | YPDcl2 | YPDcl3 | EtOHcl1 | EtOHcl2 | Galcl1 | YPDnc1 | YPDnc2 | YPDnc3 | YPDnc4 | EtOHnc1 | EtOHnc2 | Galnc1 | Galnc2 |
| 13 EAF1  | YDR359C   | YPDcl2 | YPDcl3 | EtOHcl1 | EtOHcl2 | Galcl1 | YPDnc1 | YPDnc2 | YPDnc3 | YPDnc4 | EtOHnc1 | EtOHnc2 | Galnc1 | Galnc2 |
| 13 RFU1  | YLR073C   | YPDcl2 | YPDcl3 | EtOHcl1 | EtOHcl2 | Galcl1 | YPDnc1 | YPDnc2 | YPDnc3 | YPDnc4 | EtOHnc1 | EtOHnc2 | Galnc1 | Galnc2 |
| 13 CDC11 | YJR076C   | YPDcl2 | YPDcl3 | EtOHcl1 | EtOHcl2 | Galcl1 | YPDnc1 | YPDnc2 | YPDnc3 | YPDnc4 | EtOHnc1 | EtOHnc2 | Galnc1 | Galnc2 |

|           |           |        |        |         |         |        |        |        |        |        |         |         |        |        |
|-----------|-----------|--------|--------|---------|---------|--------|--------|--------|--------|--------|---------|---------|--------|--------|
| 13 KIN3   | YAR018C   | YPDcl2 | YPDcl3 | EtOHcl1 | EtOHcl2 | Galcl1 | YPDnc1 | YPDnc2 | YPDnc3 | YPDnc4 | EtOHnc1 | EtOHnc2 | Galnc1 | Galnc2 |
| 13 CEX1   | YOR112W   | YPDcl2 | YPDcl3 | EtOHcl1 | EtOHcl2 | Galcl1 | YPDnc1 | YPDnc2 | YPDnc3 | YPDnc4 | EtOHnc1 | EtOHnc2 | Galnc1 | Galnc2 |
| 13        | YBR121C-A | YPDcl2 | YPDcl3 | EtOHcl1 | EtOHcl2 | Galcl1 | YPDnc1 | YPDnc2 | YPDnc3 | YPDnc4 | EtOHnc1 | EtOHnc2 | Galnc1 | Galnc2 |
| 13 SHG1   | YBR258C   | YPDcl2 | YPDcl3 | EtOHcl1 | EtOHcl2 | Galcl1 | YPDnc1 | YPDnc2 | YPDnc3 | YPDnc4 | EtOHnc1 | EtOHnc2 | Galnc1 | Galnc2 |
| 13 TKL1   | YPR074C   | YPDcl2 | YPDcl3 | EtOHcl1 | EtOHcl2 | Galcl1 | YPDnc1 | YPDnc2 | YPDnc3 | YPDnc4 | EtOHnc1 | EtOHnc2 | Galnc1 | Galnc2 |
| 13        | YHR162W   | YPDcl2 | YPDcl3 | EtOHcl1 | EtOHcl2 | Galcl1 | YPDnc1 | YPDnc2 | YPDnc3 | YPDnc4 | EtOHnc1 | EtOHnc2 | Galnc1 | Galnc2 |
| 13        | YFR020W   | YPDcl2 | YPDcl3 | EtOHcl1 | EtOHcl2 | Galcl1 | YPDnc1 | YPDnc2 | YPDnc3 | YPDnc4 | EtOHnc1 | EtOHnc2 | Galnc1 | Galnc2 |
| 13 ULA1   | YPL003W   | YPDcl2 | YPDcl3 | EtOHcl1 | EtOHcl2 | Galcl1 | YPDnc1 | YPDnc2 | YPDnc3 | YPDnc4 | EtOHnc1 | EtOHnc2 | Galnc1 | Galnc2 |
| 13        | YML089C   | YPDcl2 | YPDcl3 | EtOHcl1 | EtOHcl2 | Galcl1 | YPDnc1 | YPDnc2 | YPDnc3 | YPDnc4 | EtOHnc1 | EtOHnc2 | Galnc1 | Galnc2 |
| 13        | YLR297W   | YPDcl2 | YPDcl3 | EtOHcl1 | EtOHcl2 | Galcl1 | YPDnc1 | YPDnc2 | YPDnc3 | YPDnc4 | EtOHnc1 | EtOHnc2 | Galnc1 | Galnc2 |
| 13 UGX2   | YDL169C   | YPDcl2 | YPDcl3 | EtOHcl1 | EtOHcl2 | Galcl1 | YPDnc1 | YPDnc2 | YPDnc3 | YPDnc4 | EtOHnc1 | EtOHnc2 | Galnc1 | Galnc2 |
| 13 RPL35B | YDL136W   | YPDcl2 | YPDcl3 | EtOHcl1 | EtOHcl2 | Galcl1 | YPDnc1 | YPDnc2 | YPDnc3 | YPDnc4 | EtOHnc1 | EtOHnc2 | Galnc1 | Galnc2 |
| 13 RRI1   | YDL216C   | YPDcl2 | YPDcl3 | EtOHcl1 | EtOHcl2 | Galcl1 | YPDnc1 | YPDnc2 | YPDnc3 | YPDnc4 | EtOHnc1 | EtOHnc2 | Galnc1 | Galnc2 |
| 13 CDC14  | YFR028C   | YPDcl2 | YPDcl3 | EtOHcl1 | EtOHcl2 | Galcl1 | YPDnc1 | YPDnc2 | YPDnc3 | YPDnc4 | EtOHnc1 | EtOHnc2 | Galnc1 | Galnc2 |
| 13 ANS1   | YHR126C   | YPDcl2 | YPDcl3 | EtOHcl1 | EtOHcl2 | Galcl1 | YPDnc1 | YPDnc2 | YPDnc3 | YPDnc4 | EtOHnc1 | EtOHnc2 | Galnc1 | Galnc2 |
| 13 PHO80  | YOL001W   | YPDcl2 | YPDcl3 | EtOHcl1 | EtOHcl2 | Galcl1 | YPDnc1 | YPDnc2 | YPDnc3 | YPDnc4 | EtOHnc1 | EtOHnc2 | Galnc1 | Galnc2 |
| 13 BUL2   | YML111W   | YPDcl2 | YPDcl3 | EtOHcl1 | EtOHcl2 | Galcl1 | YPDnc1 | YPDnc2 | YPDnc3 | YPDnc4 | EtOHnc1 | EtOHnc2 | Galnc1 | Galnc2 |
| 13 SOK2   | YMR016C   | YPDcl2 | YPDcl3 | EtOHcl1 | EtOHcl2 | Galcl1 | YPDnc1 | YPDnc2 | YPDnc3 | YPDnc4 | EtOHnc1 | EtOHnc2 | Galnc1 | Galnc2 |
| 13        | YKL023W   | YPDcl2 | YPDcl3 | EtOHcl1 | EtOHcl2 | Galcl1 | YPDnc1 | YPDnc2 | YPDnc3 | YPDnc4 | EtOHnc1 | EtOHnc2 | Galnc1 | Galnc2 |
| 13 PEP1   | YBL017C   | YPDcl2 | YPDcl3 | EtOHcl1 | EtOHcl2 | Galcl1 | YPDnc1 | YPDnc2 | YPDnc3 | YPDnc4 | EtOHnc1 | EtOHnc2 | Galnc1 | Galnc2 |
| 13 HSL7   | YBR133C   | YPDcl2 | YPDcl3 | EtOHcl1 | EtOHcl2 | Galcl1 | YPDnc1 | YPDnc2 | YPDnc3 | YPDnc4 | EtOHnc1 | EtOHnc2 | Galnc1 | Galnc2 |
| 13        | YDR015C   | YPDcl2 | YPDcl3 | EtOHcl1 | EtOHcl2 | Galcl1 | YPDnc1 | YPDnc2 | YPDnc3 | YPDnc4 | EtOHnc1 | EtOHnc2 | Galnc1 | Galnc2 |
| 13 ECM3   | YOR092W   | YPDcl2 | YPDcl3 | EtOHcl1 | EtOHcl2 | Galcl1 | YPDnc1 | YPDnc2 | YPDnc3 | YPDnc4 | EtOHnc1 | EtOHnc2 | Galnc1 | Galnc2 |
| 13 SPT10  | YJL127C   | YPDcl2 | YPDcl3 | EtOHcl1 | EtOHcl2 | Galcl1 | YPDnc1 | YPDnc2 | YPDnc3 | YPDnc4 | EtOHnc1 | EtOHnc2 | Galnc1 | Galnc2 |
| 13 CSE2   | YNR010W   | YPDcl2 | YPDcl3 | EtOHcl1 | EtOHcl2 | Galcl1 | YPDnc1 | YPDnc2 | YPDnc3 | YPDnc4 | EtOHnc1 | EtOHnc2 | Galnc1 | Galnc2 |
| 13 HAT1   | YPL001W   | YPDcl2 | YPDcl3 | EtOHcl1 | EtOHcl2 | Galcl1 | YPDnc1 | YPDnc2 | YPDnc3 | YPDnc4 | EtOHnc1 | EtOHnc2 | Galnc1 | Galnc2 |
| 13        | YMR247W   | YPDcl2 | YPDcl3 | EtOHcl1 | EtOHcl2 | Galcl1 | YPDnc1 | YPDnc2 | YPDnc3 | YPDnc4 | EtOHnc1 | EtOHnc2 | Galnc1 | Galnc2 |
| 13 IFA38  | YBR159W   | YPDcl2 | YPDcl3 | EtOHcl1 | EtOHcl2 | Galcl1 | YPDnc1 | YPDnc2 | YPDnc3 | YPDnc4 | EtOHnc1 | EtOHnc2 | Galnc1 | Galnc2 |
| 13 MTR3   | YGR158C   | YPDcl2 | YPDcl3 | EtOHcl1 | EtOHcl2 | Galcl1 | YPDnc1 | YPDnc2 | YPDnc3 | YPDnc4 | EtOHnc1 | EtOHnc2 | Galnc1 | Galnc2 |
| 13 RPB10  | YOR210W   | YPDcl2 | YPDcl3 | EtOHcl1 | EtOHcl2 | Galcl1 | YPDnc1 | YPDnc2 | YPDnc3 | YPDnc4 | EtOHnc1 | EtOHnc2 | Galnc1 | Galnc2 |
| 13 RRT16  | YNL105W   | YPDcl2 | YPDcl3 | EtOHcl1 | EtOHcl2 | Galcl1 | YPDnc1 | YPDnc2 | YPDnc3 | YPDnc4 | EtOHnc1 | EtOHnc2 | Galnc1 | Galnc2 |
| 13 TPO5   | YKL174C   | YPDcl2 | YPDcl3 | EtOHcl1 | EtOHcl2 | Galcl1 | YPDnc1 | YPDnc2 | YPDnc3 | YPDnc4 | EtOHnc1 | EtOHnc2 | Galnc1 | Galnc2 |
| 13 SHM2   | YLR058C   | YPDcl2 | YPDcl3 | EtOHcl1 | EtOHcl2 | Galcl1 | YPDnc1 | YPDnc2 | YPDnc3 | YPDnc4 | EtOHnc1 | EtOHnc2 | Galnc1 | Galnc2 |
| 13 ADE16  | YLR028C   | YPDcl2 | YPDcl3 | EtOHcl1 | EtOHcl2 | Galcl1 | YPDnc1 | YPDnc2 | YPDnc3 | YPDnc4 | EtOHnc1 | EtOHnc2 | Galnc1 | Galnc2 |

|    |       |           |        |        |         |         |        |        |        |        |        |         |         |        |        |
|----|-------|-----------|--------|--------|---------|---------|--------|--------|--------|--------|--------|---------|---------|--------|--------|
| 13 | CTS1  | YLR286C   | YPDcl2 | YPDcl3 | EtOHcl1 | EtOHcl2 | Galcl1 | YPDnc1 | YPDnc2 | YPDnc3 | YPDnc4 | EtOHnc1 | EtOHnc2 | Galnc1 | Galnc2 |
| 13 | CHK1  | YBR274W   | YPDcl2 | YPDcl3 | EtOHcl1 | EtOHcl2 | Galcl1 | YPDnc1 | YPDnc2 | YPDnc3 | YPDnc4 | EtOHnc1 | EtOHnc2 | Galnc1 | Galnc2 |
| 13 | MTF2  | YDL044C   | YPDcl2 | YPDcl3 | EtOHcl1 | EtOHcl2 | Galcl1 | YPDnc1 | YPDnc2 | YPDnc3 | YPDnc4 | EtOHnc1 | EtOHnc2 | Galnc1 | Galnc2 |
| 13 |       | YNL305C   | YPDcl2 | YPDcl3 | EtOHcl1 | EtOHcl2 | Galcl1 | YPDnc1 | YPDnc2 | YPDnc3 | YPDnc4 | EtOHnc1 | EtOHnc2 | Galnc1 | Galnc2 |
| 13 | SPT21 | YMR179W   | YPDcl2 | YPDcl3 | EtOHcl1 | EtOHcl2 | Galcl1 | YPDnc1 | YPDnc2 | YPDnc3 | YPDnc4 | EtOHnc1 | EtOHnc2 | Galnc1 | Galnc2 |
| 13 | SER3  | YER081W   | YPDcl2 | YPDcl3 | EtOHcl1 | EtOHcl2 | Galcl1 | YPDnc1 | YPDnc2 | YPDnc3 | YPDnc4 | EtOHnc1 | EtOHnc2 | Galnc1 | Galnc2 |
| 13 |       | YEL032C-A | YPDcl2 | YPDcl3 | EtOHcl1 | EtOHcl2 | Galcl1 | YPDnc1 | YPDnc2 | YPDnc3 | YPDnc4 | EtOHnc1 | EtOHnc2 | Galnc1 | Galnc2 |
| 13 |       | YCR081C-A | YPDcl2 | YPDcl3 | EtOHcl1 | EtOHcl2 | Galcl1 | YPDnc1 | YPDnc2 | YPDnc3 | YPDnc4 | EtOHnc1 | EtOHnc2 | Galnc1 | Galnc2 |
| 13 | YHC3  | YJL059W   | YPDcl2 | YPDcl3 | EtOHcl1 | EtOHcl2 | Galcl1 | YPDnc1 | YPDnc2 | YPDnc3 | YPDnc4 | EtOHnc1 | EtOHnc2 | Galnc1 | Galnc2 |
| 13 | ASG1  | YIL130W   | YPDcl2 | YPDcl3 | EtOHcl1 | EtOHcl2 | Galcl1 | YPDnc1 | YPDnc2 | YPDnc3 | YPDnc4 | EtOHnc1 | EtOHnc2 | Galnc1 | Galnc2 |
| 13 | IES6  | YEL044W   | YPDcl2 | YPDcl3 | EtOHcl1 | EtOHcl2 | Galcl1 | YPDnc1 | YPDnc2 | YPDnc3 | YPDnc4 | EtOHnc1 | EtOHnc2 | Galnc1 | Galnc2 |
| 13 |       | YGL108C   | YPDcl2 | YPDcl3 | EtOHcl1 | EtOHcl2 | Galcl1 | YPDnc1 | YPDnc2 | YPDnc3 | YPDnc4 | EtOHnc1 | EtOHnc2 | Galnc1 | Galnc2 |
| 13 |       | YFR052C-A | YPDcl2 | YPDcl3 | EtOHcl1 | EtOHcl2 | Galcl1 | YPDnc1 | YPDnc2 | YPDnc3 | YPDnc4 | EtOHnc1 | EtOHnc2 | Galnc1 | Galnc2 |
| 13 | MEK1  | YOR351C   | YPDcl2 | YPDcl3 | EtOHcl1 | EtOHcl2 | Galcl1 | YPDnc1 | YPDnc2 | YPDnc3 | YPDnc4 | EtOHnc1 | EtOHnc2 | Galnc1 | Galnc2 |
| 13 | PIB2  | YGL023C   | YPDcl2 | YPDcl3 | EtOHcl1 | EtOHcl2 | Galcl1 | YPDnc1 | YPDnc2 | YPDnc3 | YPDnc4 | EtOHnc1 | EtOHnc2 | Galnc1 | Galnc2 |
| 13 | PIN4  | YBL051C   | YPDcl2 | YPDcl3 | EtOHcl1 | EtOHcl2 | Galcl1 | YPDnc1 | YPDnc2 | YPDnc3 | YPDnc4 | EtOHnc1 | EtOHnc2 | Galnc1 | Galnc2 |
| 13 | RFC2  | YJR068W   | YPDcl2 | YPDcl3 | EtOHcl1 | EtOHcl2 | Galcl1 | YPDnc1 | YPDnc2 | YPDnc3 | YPDnc4 | EtOHnc1 | EtOHnc2 | Galnc1 | Galnc2 |
| 13 |       | YDR042C   | YPDcl2 | YPDcl3 | EtOHcl1 | EtOHcl2 | Galcl1 | YPDnc1 | YPDnc2 | YPDnc3 | YPDnc4 | EtOHnc1 | EtOHnc2 | Galnc1 | Galnc2 |
| 13 | SFA1  | YDL168W   | YPDcl2 | YPDcl3 | EtOHcl1 | EtOHcl2 | Galcl1 | YPDnc1 | YPDnc2 | YPDnc3 | YPDnc4 | EtOHnc1 | EtOHnc2 | Galnc1 | Galnc2 |
| 13 | GAL1  | YBR020W   | YPDcl2 | YPDcl3 | EtOHcl1 | EtOHcl2 | Galcl1 | YPDnc1 | YPDnc2 | YPDnc3 | YPDnc4 | EtOHnc1 | EtOHnc2 | Galnc1 | Galnc2 |
| 13 | FUN30 | YAL019W   | YPDcl2 | YPDcl3 | EtOHcl1 | EtOHcl2 | Galcl1 | YPDnc1 | YPDnc2 | YPDnc3 | YPDnc4 | EtOHnc1 | EtOHnc2 | Galnc1 | Galnc2 |
| 13 | VPS52 | YDR484W   | YPDcl2 | YPDcl3 | EtOHcl1 | EtOHcl2 | Galcl1 | YPDnc1 | YPDnc2 | YPDnc3 | YPDnc4 | EtOHnc1 | EtOHnc2 | Galnc1 | Galnc2 |
| 13 | RAD23 | YEL037C   | YPDcl2 | YPDcl3 | EtOHcl1 | EtOHcl2 | Galcl1 | YPDnc1 | YPDnc2 | YPDnc3 | YPDnc4 | EtOHnc1 | EtOHnc2 | Galnc1 | Galnc2 |
| 13 | UBX7  | YBR273C   | YPDcl2 | YPDcl3 | EtOHcl1 | EtOHcl2 | Galcl1 | YPDnc1 | YPDnc2 | YPDnc3 | YPDnc4 | EtOHnc1 | EtOHnc2 | Galnc1 | Galnc2 |
| 13 | FUS1  | YCL027W   | YPDcl2 | YPDcl3 | EtOHcl1 | EtOHcl2 | Galcl1 | YPDnc1 | YPDnc2 | YPDnc3 | YPDnc4 | EtOHnc1 | EtOHnc2 | Galnc1 | Galnc2 |
| 13 |       | YDL114W   | YPDcl2 | YPDcl3 | EtOHcl1 | EtOHcl2 | Galcl1 | YPDnc1 | YPDnc2 | YPDnc3 | YPDnc4 | EtOHnc1 | EtOHnc2 | Galnc1 | Galnc2 |
| 13 | ARC15 | YIL062C   | YPDcl2 | YPDcl3 | EtOHcl1 | EtOHcl2 | Galcl1 | YPDnc1 | YPDnc2 | YPDnc3 | YPDnc4 | EtOHnc1 | EtOHnc2 | Galnc1 | Galnc2 |
| 13 | NDD1  | YOR372C   | YPDcl2 | YPDcl3 | EtOHcl1 | EtOHcl2 | Galcl1 | YPDnc1 | YPDnc2 | YPDnc3 | YPDnc4 | EtOHnc1 | EtOHnc2 | Galnc1 | Galnc2 |
| 13 | USE1  | YGL098W   | YPDcl2 | YPDcl3 | EtOHcl1 | EtOHcl2 | Galcl1 | YPDnc1 | YPDnc2 | YPDnc3 | YPDnc4 | EtOHnc1 | EtOHnc2 | Galnc1 | Galnc2 |
| 13 | PEX6  | YNL329C   | YPDcl2 | YPDcl3 | EtOHcl1 | EtOHcl2 | Galcl1 | YPDnc1 | YPDnc2 | YPDnc3 | YPDnc4 | EtOHnc1 | EtOHnc2 | Galnc1 | Galnc2 |
| 13 | CLN1  | YMR199W   | YPDcl2 | YPDcl3 | EtOHcl1 | EtOHcl2 | Galcl1 | YPDnc1 | YPDnc2 | YPDnc3 | YPDnc4 | EtOHnc1 | EtOHnc2 | Galnc1 | Galnc2 |
| 13 | CWC2  | YDL209C   | YPDcl2 | YPDcl3 | EtOHcl1 | EtOHcl2 | Galcl1 | YPDnc1 | YPDnc2 | YPDnc3 | YPDnc4 | EtOHnc1 | EtOHnc2 | Galnc1 | Galnc2 |
| 13 | CDC39 | YCR093W   | YPDcl2 | YPDcl3 | EtOHcl1 | EtOHcl2 | Galcl1 | YPDnc1 | YPDnc2 | YPDnc3 | YPDnc4 | EtOHnc1 | EtOHnc2 | Galnc1 | Galnc2 |
| 13 | ADE4  | YMR300C   | YPDcl2 | YPDcl3 | EtOHcl1 | EtOHcl2 | Galcl1 | YPDnc1 | YPDnc2 | YPDnc3 | YPDnc4 | EtOHnc1 | EtOHnc2 | Galnc1 | Galnc2 |

|    |        |           |        |        |         |         |        |        |        |        |        |         |         |        |        |
|----|--------|-----------|--------|--------|---------|---------|--------|--------|--------|--------|--------|---------|---------|--------|--------|
| 13 | PAM18  | YLR008C   | YPDcl2 | YPDcl3 | EtOHcl1 | EtOHcl2 | Galcl1 | YPDnc1 | YPDnc2 | YPDnc3 | YPDnc4 | EtOHnc1 | EtOHnc2 | Galnc1 | Galnc2 |
| 13 | RGI2   | YIL057C   | YPDcl2 | YPDcl3 | EtOHcl1 | EtOHcl2 | Galcl1 | YPDnc1 | YPDnc2 | YPDnc3 | YPDnc4 | EtOHnc1 | EtOHnc2 | Galnc1 | Galnc2 |
| 13 | PFK26  | YIL107C   | YPDcl2 | YPDcl3 | EtOHcl1 | EtOHcl2 | Galcl1 | YPDnc1 | YPDnc2 | YPDnc3 | YPDnc4 | EtOHnc1 | EtOHnc2 | Galnc1 | Galnc2 |
| 13 |        | YBL107W-  | YPDcl2 | YPDcl3 | EtOHcl1 | EtOHcl2 | Galcl1 | YPDnc1 | YPDnc2 | YPDnc3 | YPDnc4 | EtOHnc1 | EtOHnc2 | Galnc1 | Galnc2 |
| 13 | MAS2   | YHR024C   | YPDcl2 | YPDcl3 | EtOHcl1 | EtOHcl2 | Galcl1 | YPDnc1 | YPDnc2 | YPDnc3 | YPDnc4 | EtOHnc1 | EtOHnc2 | Galnc1 | Galnc2 |
| 13 | YPS1   | YLR120C   | YPDcl2 | YPDcl3 | EtOHcl1 | EtOHcl2 | Galcl1 | YPDnc1 | YPDnc2 | YPDnc3 | YPDnc4 | EtOHnc1 | EtOHnc2 | Galnc1 | Galnc2 |
| 13 |        | YPR089W   | YPDcl2 | YPDcl3 | EtOHcl1 | EtOHcl2 | Galcl1 | YPDnc1 | YPDnc2 | YPDnc3 | YPDnc4 | EtOHnc1 | EtOHnc2 | Galnc1 | Galnc2 |
| 13 | YAP1   | YML007W   | YPDcl2 | YPDcl3 | EtOHcl1 | EtOHcl2 | Galcl1 | YPDnc1 | YPDnc2 | YPDnc3 | YPDnc4 | EtOHnc1 | EtOHnc2 | Galnc1 | Galnc2 |
| 13 |        | YEL030C-A | YPDcl2 | YPDcl3 | EtOHcl1 | EtOHcl2 | Galcl1 | YPDnc1 | YPDnc2 | YPDnc3 | YPDnc4 | EtOHnc1 | EtOHnc2 | Galnc1 | Galnc2 |
| 13 |        | YPL039W   | YPDcl2 | YPDcl3 | EtOHcl1 | EtOHcl2 | Galcl1 | YPDnc1 | YPDnc2 | YPDnc3 | YPDnc4 | EtOHnc1 | EtOHnc2 | Galnc1 | Galnc2 |
| 13 | THI7   | YLR237W   | YPDcl2 | YPDcl3 | EtOHcl1 | EtOHcl2 | Galcl1 | YPDnc1 | YPDnc2 | YPDnc3 | YPDnc4 | EtOHnc1 | EtOHnc2 | Galnc1 | Galnc2 |
| 13 | MSH1   | YHR120W   | YPDcl2 | YPDcl3 | EtOHcl1 | EtOHcl2 | Galcl1 | YPDnc1 | YPDnc2 | YPDnc3 | YPDnc4 | EtOHnc1 | EtOHnc2 | Galnc1 | Galnc2 |
| 13 | RPL22B | YFL034C-A | YPDcl2 | YPDcl3 | EtOHcl1 | EtOHcl2 | Galcl1 | YPDnc1 | YPDnc2 | YPDnc3 | YPDnc4 | EtOHnc1 | EtOHnc2 | Galnc1 | Galnc2 |
| 13 | IRC15  | YPL017C   | YPDcl2 | YPDcl3 | EtOHcl1 | EtOHcl2 | Galcl1 | YPDnc1 | YPDnc2 | YPDnc3 | YPDnc4 | EtOHnc1 | EtOHnc2 | Galnc1 | Galnc2 |
| 13 | GCR1   | YPL075W   | YPDcl2 | YPDcl3 | EtOHcl1 | EtOHcl2 | Galcl1 | YPDnc1 | YPDnc2 | YPDnc3 | YPDnc4 | EtOHnc1 | EtOHnc2 | Galnc1 | Galnc2 |
| 13 | GLO1   | YML004C   | YPDcl2 | YPDcl3 | EtOHcl1 | EtOHcl2 | Galcl1 | YPDnc1 | YPDnc2 | YPDnc3 | YPDnc4 | EtOHnc1 | EtOHnc2 | Galnc1 | Galnc2 |
| 13 |        | YNL097W-  | YPDcl2 | YPDcl3 | EtOHcl1 | EtOHcl2 | Galcl1 | YPDnc1 | YPDnc2 | YPDnc3 | YPDnc4 | EtOHnc1 | EtOHnc2 | Galnc1 | Galnc2 |
| 13 | GSG1   | YDR108W   | YPDcl2 | YPDcl3 | EtOHcl1 | EtOHcl2 | Galcl1 | YPDnc1 | YPDnc2 | YPDnc3 | YPDnc4 | EtOHnc1 | EtOHnc2 | Galnc1 | Galnc2 |
| 13 |        | YKL102C   | YPDcl2 | YPDcl3 | EtOHcl1 | EtOHcl2 | Galcl1 | YPDnc1 | YPDnc2 | YPDnc3 | YPDnc4 | EtOHnc1 | EtOHnc2 | Galnc1 | Galnc2 |
| 13 | SLM6   | YBR266C   | YPDcl2 | YPDcl3 | EtOHcl1 | EtOHcl2 | Galcl1 | YPDnc1 | YPDnc2 | YPDnc3 | YPDnc4 | EtOHnc1 | EtOHnc2 | Galnc1 | Galnc2 |
| 13 | BUD16  | YEL029C   | YPDcl2 | YPDcl3 | EtOHcl1 | EtOHcl2 | Galcl1 | YPDnc1 | YPDnc2 | YPDnc3 | YPDnc4 | EtOHnc1 | EtOHnc2 | Galnc1 | Galnc2 |
| 13 | SDA1   | YGR245C   | YPDcl2 | YPDcl3 | EtOHcl1 | EtOHcl2 | Galcl1 | YPDnc1 | YPDnc2 | YPDnc3 | YPDnc4 | EtOHnc1 | EtOHnc2 | Galnc1 | Galnc2 |
| 13 |        | YNL040W   | YPDcl2 | YPDcl3 | EtOHcl1 | EtOHcl2 | Galcl1 | YPDnc1 | YPDnc2 | YPDnc3 | YPDnc4 | EtOHnc1 | EtOHnc2 | Galnc1 | Galnc2 |
| 13 | CCP1   | YKR066C   | YPDcl2 | YPDcl3 | EtOHcl1 | EtOHcl2 | Galcl1 | YPDnc1 | YPDnc2 | YPDnc3 | YPDnc4 | EtOHnc1 | EtOHnc2 | Galnc1 | Galnc2 |
| 13 | YIP5   | YGL161C   | YPDcl2 | YPDcl3 | EtOHcl1 | EtOHcl2 | Galcl1 | YPDnc1 | YPDnc2 | YPDnc3 | YPDnc4 | EtOHnc1 | EtOHnc2 | Galnc1 | Galnc2 |
| 13 |        | YMR105W-  | YPDcl2 | YPDcl3 | EtOHcl1 | EtOHcl2 | Galcl1 | YPDnc1 | YPDnc2 | YPDnc3 | YPDnc4 | EtOHnc1 | EtOHnc2 | Galnc1 | Galnc2 |
| 13 | NOC4   | YPR144C   | YPDcl2 | YPDcl3 | EtOHcl1 | EtOHcl2 | Galcl1 | YPDnc1 | YPDnc2 | YPDnc3 | YPDnc4 | EtOHnc1 | EtOHnc2 | Galnc1 | Galnc2 |
| 13 | AGP3   | YFL055W   | YPDcl2 | YPDcl3 | EtOHcl1 | EtOHcl2 | Galcl1 | YPDnc1 | YPDnc2 | YPDnc3 | YPDnc4 | EtOHnc1 | EtOHnc2 | Galnc1 | Galnc2 |
| 13 |        | YIL086C   | YPDcl2 | YPDcl3 | EtOHcl1 | EtOHcl2 | Galcl1 | YPDnc1 | YPDnc2 | YPDnc3 | YPDnc4 | EtOHnc1 | EtOHnc2 | Galnc1 | Galnc2 |
| 13 | TMA20  | YER007C-A | YPDcl2 | YPDcl3 | EtOHcl1 | EtOHcl2 | Galcl1 | YPDnc1 | YPDnc2 | YPDnc3 | YPDnc4 | EtOHnc1 | EtOHnc2 | Galnc1 | Galnc2 |
| 13 | MSL5   | YLR116W   | YPDcl2 | YPDcl3 | EtOHcl1 | EtOHcl2 | Galcl1 | YPDnc1 | YPDnc2 | YPDnc3 | YPDnc4 | EtOHnc1 | EtOHnc2 | Galnc1 | Galnc2 |
| 13 |        | YAL047W-  | YPDcl2 | YPDcl3 | EtOHcl1 | EtOHcl2 | Galcl1 | YPDnc1 | YPDnc2 | YPDnc3 | YPDnc4 | EtOHnc1 | EtOHnc2 | Galnc1 | Galnc2 |
| 13 | COX10  | YPL172C   | YPDcl2 | YPDcl3 | EtOHcl1 | EtOHcl2 | Galcl1 | YPDnc1 | YPDnc2 | YPDnc3 | YPDnc4 | EtOHnc1 | EtOHnc2 | Galnc1 | Galnc2 |
| 13 | MMT2   | YPL224C   | YPDcl2 | YPDcl3 | EtOHcl1 | EtOHcl2 | Galcl1 | YPDnc1 | YPDnc2 | YPDnc3 | YPDnc4 | EtOHnc1 | EtOHnc2 | Galnc1 | Galnc2 |

|          |          |        |        |         |         |        |        |        |        |        |         |         |        |        |
|----------|----------|--------|--------|---------|---------|--------|--------|--------|--------|--------|---------|---------|--------|--------|
| 13 ADH3  | YMR083W  | YPDcl2 | YPDcl3 | EtOHcl1 | EtOHcl2 | Galcl1 | YPDnc1 | YPDnc2 | YPDnc3 | YPDnc4 | EtOHnc1 | EtOHnc2 | Galnc1 | Galnc2 |
| 13 TPP1  | YMR156C  | YPDcl2 | YPDcl3 | EtOHcl1 | EtOHcl2 | Galcl1 | YPDnc1 | YPDnc2 | YPDnc3 | YPDnc4 | EtOHnc1 | EtOHnc2 | Galnc1 | Galnc2 |
| 13 PIL1  | YGR086C  | YPDcl2 | YPDcl3 | EtOHcl1 | EtOHcl2 | Galcl1 | YPDnc1 | YPDnc2 | YPDnc3 | YPDnc4 | EtOHnc1 | EtOHnc2 | Galnc1 | Galnc2 |
| 13 SCH9  | YHR205W  | YPDcl2 | YPDcl3 | EtOHcl1 | EtOHcl2 | Galcl1 | YPDnc1 | YPDnc2 | YPDnc3 | YPDnc4 | EtOHnc1 | EtOHnc2 | Galnc1 | Galnc2 |
| 13 YOR1  | YGR281W  | YPDcl2 | YPDcl3 | EtOHcl1 | EtOHcl2 | Galcl1 | YPDnc1 | YPDnc2 | YPDnc3 | YPDnc4 | EtOHnc1 | EtOHnc2 | Galnc1 | Galnc2 |
| 13 ARE1  | YCR048W  | YPDcl2 | YPDcl3 | EtOHcl1 | EtOHcl2 | Galcl1 | YPDnc1 | YPDnc2 | YPDnc3 | YPDnc4 | EtOHnc1 | EtOHnc2 | Galnc1 | Galnc2 |
| 13 PEX19 | YDL065C  | YPDcl2 | YPDcl3 | EtOHcl1 | EtOHcl2 | Galcl1 | YPDnc1 | YPDnc2 | YPDnc3 | YPDnc4 | EtOHnc1 | EtOHnc2 | Galnc1 | Galnc2 |
| 13 DLT1  | YMR126C  | YPDcl2 | YPDcl3 | EtOHcl1 | EtOHcl2 | Galcl1 | YPDnc1 | YPDnc2 | YPDnc3 | YPDnc4 | EtOHnc1 | EtOHnc2 | Galnc1 | Galnc2 |
| 13 ENV6  | YEL059W  | YPDcl2 | YPDcl3 | EtOHcl1 | EtOHcl2 | Galcl1 | YPDnc1 | YPDnc2 | YPDnc3 | YPDnc4 | EtOHnc1 | EtOHnc2 | Galnc1 | Galnc2 |
| 13       | YJL195C  | YPDcl2 | YPDcl3 | EtOHcl1 | EtOHcl2 | Galcl1 | YPDnc1 | YPDnc2 | YPDnc3 | YPDnc4 | EtOHnc1 | EtOHnc2 | Galnc1 | Galnc2 |
| 13 BNA7  | YDR428C  | YPDcl2 | YPDcl3 | EtOHcl1 | EtOHcl2 | Galcl1 | YPDnc1 | YPDnc2 | YPDnc3 | YPDnc4 | EtOHnc1 | EtOHnc2 | Galnc1 | Galnc2 |
| 13 FIR1  | YER032W  | YPDcl2 | YPDcl3 | EtOHcl1 | EtOHcl2 | Galcl1 | YPDnc1 | YPDnc2 | YPDnc3 | YPDnc4 | EtOHnc1 | EtOHnc2 | Galnc1 | Galnc2 |
| 13 XKS1  | YGR194C  | YPDcl2 | YPDcl3 | EtOHcl1 | EtOHcl2 | Galcl1 | YPDnc1 | YPDnc2 | YPDnc3 | YPDnc4 | EtOHnc1 | EtOHnc2 | Galnc1 | Galnc2 |
| 13       | YHR056W- | YPDcl2 | YPDcl3 | EtOHcl1 | EtOHcl2 | Galcl1 | YPDnc1 | YPDnc2 | YPDnc3 | YPDnc4 | EtOHnc1 | EtOHnc2 | Galnc1 | Galnc2 |
| 13 PAC10 | YGR078C  | YPDcl2 | YPDcl3 | EtOHcl1 | EtOHcl2 | Galcl1 | YPDnc1 | YPDnc2 | YPDnc3 | YPDnc4 | EtOHnc1 | EtOHnc2 | Galnc1 | Galnc2 |
| 13       | YMR265C  | YPDcl2 | YPDcl3 | EtOHcl1 | EtOHcl2 | Galcl1 | YPDnc1 | YPDnc2 | YPDnc3 | YPDnc4 | EtOHnc1 | EtOHnc2 | Galnc1 | Galnc2 |
| 13 SOL3  | YHR163W  | YPDcl2 | YPDcl3 | EtOHcl1 | EtOHcl2 | Galcl1 | YPDnc1 | YPDnc2 | YPDnc3 | YPDnc4 | EtOHnc1 | EtOHnc2 | Galnc1 | Galnc2 |
| 13 ODC2  | YOR222W  | YPDcl2 | YPDcl3 | EtOHcl1 | EtOHcl2 | Galcl1 | YPDnc1 | YPDnc2 | YPDnc3 | YPDnc4 | EtOHnc1 | EtOHnc2 | Galnc1 | Galnc2 |
| 13 RTG3  | YBL103C  | YPDcl2 | YPDcl3 | EtOHcl1 | EtOHcl2 | Galcl1 | YPDnc1 | YPDnc2 | YPDnc3 | YPDnc4 | EtOHnc1 | EtOHnc2 | Galnc1 | Galnc2 |
| 13       | YLR358C  | YPDcl2 | YPDcl3 | EtOHcl1 | EtOHcl2 | Galcl1 | YPDnc1 | YPDnc2 | YPDnc3 | YPDnc4 | EtOHnc1 | EtOHnc2 | Galnc1 | Galnc2 |
| 13 SEN15 | YMR059W  | YPDcl2 | YPDcl3 | EtOHcl1 | EtOHcl2 | Galcl1 | YPDnc1 | YPDnc2 | YPDnc3 | YPDnc4 | EtOHnc1 | EtOHnc2 | Galnc1 | Galnc2 |
| 13 ESC8  | YOL017W  | YPDcl2 | YPDcl3 | EtOHcl1 | EtOHcl2 | Galcl1 | YPDnc1 | YPDnc2 | YPDnc3 | YPDnc4 | EtOHnc1 | EtOHnc2 | Galnc1 | Galnc2 |
| 13 NAM2  | YLR382C  | YPDcl2 | YPDcl3 | EtOHcl1 | EtOHcl2 | Galcl1 | YPDnc1 | YPDnc2 | YPDnc3 | YPDnc4 | EtOHnc1 | EtOHnc2 | Galnc1 | Galnc2 |
| 13       | YBR242W  | YPDcl2 | YPDcl3 | EtOHcl1 | EtOHcl2 | Galcl1 | YPDnc1 | YPDnc2 | YPDnc3 | YPDnc4 | EtOHnc1 | EtOHnc2 | Galnc1 | Galnc2 |
| 13 HAP3  | YBL021C  | YPDcl2 | YPDcl3 | EtOHcl1 | EtOHcl2 | Galcl1 | YPDnc1 | YPDnc2 | YPDnc3 | YPDnc4 | EtOHnc1 | EtOHnc2 | Galnc1 | Galnc2 |
| 13 PRE1  | YER012W  | YPDcl2 | YPDcl3 | EtOHcl1 | EtOHcl2 | Galcl1 | YPDnc1 | YPDnc2 | YPDnc3 | YPDnc4 | EtOHnc1 | EtOHnc2 | Galnc1 | Galnc2 |
| 13       | YKL068W- | YPDcl2 | YPDcl3 | EtOHcl1 | EtOHcl2 | Galcl1 | YPDnc1 | YPDnc2 | YPDnc3 | YPDnc4 | EtOHnc1 | EtOHnc2 | Galnc1 | Galnc2 |
| 13 HUL5  | YGL141W  | YPDcl2 | YPDcl3 | EtOHcl1 | EtOHcl2 | Galcl1 | YPDnc1 | YPDnc2 | YPDnc3 | YPDnc4 | EtOHnc1 | EtOHnc2 | Galnc1 | Galnc2 |
| 13 HEH2  | YDR458C  | YPDcl2 | YPDcl3 | EtOHcl1 | EtOHcl2 | Galcl1 | YPDnc1 | YPDnc2 | YPDnc3 | YPDnc4 | EtOHnc1 | EtOHnc2 | Galnc1 | Galnc2 |
| 13 HST1  | YOL068C  | YPDcl2 | YPDcl3 | EtOHcl1 | EtOHcl2 | Galcl1 | YPDnc1 | YPDnc2 | YPDnc3 | YPDnc4 | EtOHnc1 | EtOHnc2 | Galnc1 | Galnc2 |
| 13 AVL9  | YLR114C  | YPDcl2 | YPDcl3 | EtOHcl1 | EtOHcl2 | Galcl1 | YPDnc1 | YPDnc2 | YPDnc3 | YPDnc4 | EtOHnc1 | EtOHnc2 | Galnc1 | Galnc2 |
| 13 NPA3  | YJR072C  | YPDcl2 | YPDcl3 | EtOHcl1 | EtOHcl2 | Galcl1 | YPDnc1 | YPDnc2 | YPDnc3 | YPDnc4 | EtOHnc1 | EtOHnc2 | Galnc1 | Galnc2 |
| 13 CIA1  | YDR267C  | YPDcl2 | YPDcl3 | EtOHcl1 | EtOHcl2 | Galcl1 | YPDnc1 | YPDnc2 | YPDnc3 | YPDnc4 | EtOHnc1 | EtOHnc2 | Galnc1 | Galnc2 |
| 13 MPS3  | YJL019W  | YPDcl2 | YPDcl3 | EtOHcl1 | EtOHcl2 | Galcl1 | YPDnc1 | YPDnc2 | YPDnc3 | YPDnc4 | EtOHnc1 | EtOHnc2 | Galnc1 | Galnc2 |

|          |         |        |        |         |         |        |        |        |        |        |         |         |        |        |
|----------|---------|--------|--------|---------|---------|--------|--------|--------|--------|--------|---------|---------|--------|--------|
| 13 HIS6  | YIL020C | YPDcl2 | YPDcl3 | EtOHcl1 | EtOHcl2 | Galcl1 | YPDnc1 | YPDnc2 | YPDnc3 | YPDnc4 | EtOHnc1 | EtOHnc2 | Galnc1 | Galnc2 |
| 13       | YOR073W | YPDcl2 | YPDcl3 | EtOHcl1 | EtOHcl2 | Galcl1 | YPDnc1 | YPDnc2 | YPDnc3 | YPDnc4 | EtOHnc1 | EtOHnc2 | Galnc1 | Galnc2 |
| 13 MTQ1  | YNL063W | YPDcl2 | YPDcl3 | EtOHcl1 | EtOHcl2 | Galcl1 | YPDnc1 | YPDnc2 | YPDnc3 | YPDnc4 | EtOHnc1 | EtOHnc2 | Galnc1 | Galnc2 |
| 13 DUG1  | YFR044C | YPDcl2 | YPDcl3 | EtOHcl1 | EtOHcl2 | Galcl1 | YPDnc1 | YPDnc2 | YPDnc3 | YPDnc4 | EtOHnc1 | EtOHnc2 | Galnc1 | Galnc2 |
| 13 TAO3  | YIL129C | YPDcl2 | YPDcl3 | EtOHcl1 | EtOHcl2 | Galcl1 | YPDnc1 | YPDnc2 | YPDnc3 | YPDnc4 | EtOHnc1 | EtOHnc2 | Galnc1 | Galnc2 |
| 13       | YGL176C | YPDcl2 | YPDcl3 | EtOHcl1 | EtOHcl2 | Galcl1 | YPDnc1 | YPDnc2 | YPDnc3 | YPDnc4 | EtOHnc1 | EtOHnc2 | Galnc1 | Galnc2 |
| 13 MNN10 | YDR245W | YPDcl2 | YPDcl3 | EtOHcl1 | EtOHcl2 | Galcl1 | YPDnc1 | YPDnc2 | YPDnc3 | YPDnc4 | EtOHnc1 | EtOHnc2 | Galnc1 | Galnc2 |
| 13 TCP1  | YDR212W | YPDcl2 | YPDcl3 | EtOHcl1 | EtOHcl2 | Galcl1 | YPDnc1 | YPDnc2 | YPDnc3 | YPDnc4 | EtOHnc1 | EtOHnc2 | Galnc1 | Galnc2 |
| 13       | YDR149C | YPDcl2 | YPDcl3 | EtOHcl1 | EtOHcl2 | Galcl1 | YPDnc1 | YPDnc2 | YPDnc3 | YPDnc4 | EtOHnc1 | EtOHnc2 | Galnc1 | Galnc2 |
| 13 OST2  | YOR103C | YPDcl2 | YPDcl3 | EtOHcl1 | EtOHcl2 | Galcl1 | YPDnc1 | YPDnc2 | YPDnc3 | YPDnc4 | EtOHnc1 | EtOHnc2 | Galnc1 | Galnc2 |
| 13 SEC63 | YOR254C | YPDcl2 | YPDcl3 | EtOHcl1 | EtOHcl2 | Galcl1 | YPDnc1 | YPDnc2 | YPDnc3 | YPDnc4 | EtOHnc1 | EtOHnc2 | Galnc1 | Galnc2 |
| 13 YPK1  | YKL126W | YPDcl2 | YPDcl3 | EtOHcl1 | EtOHcl2 | Galcl1 | YPDnc1 | YPDnc2 | YPDnc3 | YPDnc4 | EtOHnc1 | EtOHnc2 | Galnc1 | Galnc2 |
| 13 RPS1A | YLR441C | YPDcl2 | YPDcl3 | EtOHcl1 | EtOHcl2 | Galcl1 | YPDnc1 | YPDnc2 | YPDnc3 | YPDnc4 | EtOHnc1 | EtOHnc2 | Galnc1 | Galnc2 |
| 13       | YFR012W | YPDcl2 | YPDcl3 | EtOHcl1 | EtOHcl2 | Galcl1 | YPDnc1 | YPDnc2 | YPDnc3 | YPDnc4 | EtOHnc1 | EtOHnc2 | Galnc1 | Galnc2 |
| 13       | YBR204C | YPDcl2 | YPDcl3 | EtOHcl1 | EtOHcl2 | Galcl1 | YPDnc1 | YPDnc2 | YPDnc3 | YPDnc4 | EtOHnc1 | EtOHnc2 | Galnc1 | Galnc2 |
| 13 BUD13 | YGL174W | YPDcl2 | YPDcl3 | EtOHcl1 | EtOHcl2 | Galcl1 | YPDnc1 | YPDnc2 | YPDnc3 | YPDnc4 | EtOHnc1 | EtOHnc2 | Galnc1 | Galnc2 |
| 13 PDR3  | YBL005W | YPDcl2 | YPDcl3 | EtOHcl1 | EtOHcl2 | Galcl1 | YPDnc1 | YPDnc2 | YPDnc3 | YPDnc4 | EtOHnc1 | EtOHnc2 | Galnc1 | Galnc2 |
| 13       | YIL108W | YPDcl2 | YPDcl3 | EtOHcl1 | EtOHcl2 | Galcl1 | YPDnc1 | YPDnc2 | YPDnc3 | YPDnc4 | EtOHnc1 | EtOHnc2 | Galnc1 | Galnc2 |
| 13 RPB7  | YDR404C | YPDcl2 | YPDcl3 | EtOHcl1 | EtOHcl2 | Galcl1 | YPDnc1 | YPDnc2 | YPDnc3 | YPDnc4 | EtOHnc1 | EtOHnc2 | Galnc1 | Galnc2 |
| 13 ASE1  | YOR058C | YPDcl2 | YPDcl3 | EtOHcl1 | EtOHcl2 | Galcl1 | YPDnc1 | YPDnc2 | YPDnc3 | YPDnc4 | EtOHnc1 | EtOHnc2 | Galnc1 | Galnc2 |
| 13       | YBL104C | YPDcl2 | YPDcl3 | EtOHcl1 | EtOHcl2 | Galcl1 | YPDnc1 | YPDnc2 | YPDnc3 | YPDnc4 | EtOHnc1 | EtOHnc2 | Galnc1 | Galnc2 |
| 13 RXT2  | YBR095C | YPDcl2 | YPDcl3 | EtOHcl1 | EtOHcl2 | Galcl1 | YPDnc1 | YPDnc2 | YPDnc3 | YPDnc4 | EtOHnc1 | EtOHnc2 | Galnc1 | Galnc2 |
| 13 BET1  | YIL004C | YPDcl2 | YPDcl3 | EtOHcl1 | EtOHcl2 | Galcl1 | YPDnc1 | YPDnc2 | YPDnc3 | YPDnc4 | EtOHnc1 | EtOHnc2 | Galnc1 | Galnc2 |
| 13 TOR2  | YKL203C | YPDcl2 | YPDcl3 | EtOHcl1 | EtOHcl2 | Galcl1 | YPDnc1 | YPDnc2 | YPDnc3 | YPDnc4 | EtOHnc1 | EtOHnc2 | Galnc1 | Galnc2 |
| 13 MCH2  | YKL221W | YPDcl2 | YPDcl3 | EtOHcl1 | EtOHcl2 | Galcl1 | YPDnc1 | YPDnc2 | YPDnc3 | YPDnc4 | EtOHnc1 | EtOHnc2 | Galnc1 | Galnc2 |
| 13 IPI1  | YHR085W | YPDcl2 | YPDcl3 | EtOHcl1 | EtOHcl2 | Galcl1 | YPDnc1 | YPDnc2 | YPDnc3 | YPDnc4 | EtOHnc1 | EtOHnc2 | Galnc1 | Galnc2 |
| 13 UGA4  | YDL210W | YPDcl2 | YPDcl3 | EtOHcl1 | EtOHcl2 | Galcl1 | YPDnc1 | YPDnc2 | YPDnc3 | YPDnc4 | EtOHnc1 | EtOHnc2 | Galnc1 | Galnc2 |
| 13 MRS4  | YKR052C | YPDcl2 | YPDcl3 | EtOHcl1 | EtOHcl2 | Galcl1 | YPDnc1 | YPDnc2 | YPDnc3 | YPDnc4 | EtOHnc1 | EtOHnc2 | Galnc1 | Galnc2 |
| 13 CDC37 | YDR168W | YPDcl2 | YPDcl3 | EtOHcl1 | EtOHcl2 | Galcl1 | YPDnc1 | YPDnc2 | YPDnc3 | YPDnc4 | EtOHnc1 | EtOHnc2 | Galnc1 | Galnc2 |
| 13 KRI1  | YNL308C | YPDcl2 | YPDcl3 | EtOHcl1 | EtOHcl2 | Galcl1 | YPDnc1 | YPDnc2 | YPDnc3 | YPDnc4 | EtOHnc1 | EtOHnc2 | Galnc1 | Galnc2 |
| 13 LCB4  | YOR171C | YPDcl2 | YPDcl3 | EtOHcl1 | EtOHcl2 | Galcl1 | YPDnc1 | YPDnc2 | YPDnc3 | YPDnc4 | EtOHnc1 | EtOHnc2 | Galnc1 | Galnc2 |
| 13 TRX1  | YLR043C | YPDcl2 | YPDcl3 | EtOHcl1 | EtOHcl2 | Galcl1 | YPDnc1 | YPDnc2 | YPDnc3 | YPDnc4 | EtOHnc1 | EtOHnc2 | Galnc1 | Galnc2 |
| 13 ATP1  | YBL099W | YPDcl2 | YPDcl3 | EtOHcl1 | EtOHcl2 | Galcl1 | YPDnc1 | YPDnc2 | YPDnc3 | YPDnc4 | EtOHnc1 | EtOHnc2 | Galnc1 | Galnc2 |
| 13 BMS1  | YPL217C | YPDcl2 | YPDcl3 | EtOHcl1 | EtOHcl2 | Galcl1 | YPDnc1 | YPDnc2 | YPDnc3 | YPDnc4 | EtOHnc1 | EtOHnc2 | Galnc1 | Galnc2 |

|           |           |        |        |         |         |        |        |        |        |        |         |         |        |        |
|-----------|-----------|--------|--------|---------|---------|--------|--------|--------|--------|--------|---------|---------|--------|--------|
| 13 HES1   | YOR237W   | YPDcl2 | YPDcl3 | EtOHcl1 | EtOHcl2 | Galcl1 | YPDnc1 | YPDnc2 | YPDnc3 | YPDnc4 | EtOHnc1 | EtOHnc2 | Galnc1 | Galnc2 |
| 13 COX12  | YLR038C   | YPDcl2 | YPDcl3 | EtOHcl1 | EtOHcl2 | Galcl1 | YPDnc1 | YPDnc2 | YPDnc3 | YPDnc4 | EtOHnc1 | EtOHnc2 | Galnc1 | Galnc2 |
| 13        | YMR030W   | YPDcl2 | YPDcl3 | EtOHcl1 | EtOHcl2 | Galcl1 | YPDnc1 | YPDnc2 | YPDnc3 | YPDnc4 | EtOHnc1 | EtOHnc2 | Galnc1 | Galnc2 |
| 13 TAF9   | YMR236W   | YPDcl2 | YPDcl3 | EtOHcl1 | EtOHcl2 | Galcl1 | YPDnc1 | YPDnc2 | YPDnc3 | YPDnc4 | EtOHnc1 | EtOHnc2 | Galnc1 | Galnc2 |
| 13        | YJR056C   | YPDcl2 | YPDcl3 | EtOHcl1 | EtOHcl2 | Galcl1 | YPDnc1 | YPDnc2 | YPDnc3 | YPDnc4 | EtOHnc1 | EtOHnc2 | Galnc1 | Galnc2 |
| 13        | YPR130C   | YPDcl2 | YPDcl3 | EtOHcl1 | EtOHcl2 | Galcl1 | YPDnc1 | YPDnc2 | YPDnc3 | YPDnc4 | EtOHnc1 | EtOHnc2 | Galnc1 | Galnc2 |
| 13 RPS30A | YLR287C-A | YPDcl2 | YPDcl3 | EtOHcl1 | EtOHcl2 | Galcl1 | YPDnc1 | YPDnc2 | YPDnc3 | YPDnc4 | EtOHnc1 | EtOHnc2 | Galnc1 | Galnc2 |
| 13 HVG1   | YER039C   | YPDcl2 | YPDcl3 | EtOHcl1 | EtOHcl2 | Galcl1 | YPDnc1 | YPDnc2 | YPDnc3 | YPDnc4 | EtOHnc1 | EtOHnc2 | Galnc1 | Galnc2 |
| 13 DAL82  | YNL314W   | YPDcl2 | YPDcl3 | EtOHcl1 | EtOHcl2 | Galcl1 | YPDnc1 | YPDnc2 | YPDnc3 | YPDnc4 | EtOHnc1 | EtOHnc2 | Galnc1 | Galnc2 |
| 13        | YDR387C   | YPDcl2 | YPDcl3 | EtOHcl1 | EtOHcl2 | Galcl1 | YPDnc1 | YPDnc2 | YPDnc3 | YPDnc4 | EtOHnc1 | EtOHnc2 | Galnc1 | Galnc2 |
| 13 PCI8   | YIL071C   | YPDcl2 | YPDcl3 | EtOHcl1 | EtOHcl2 | Galcl1 | YPDnc1 | YPDnc2 | YPDnc3 | YPDnc4 | EtOHnc1 | EtOHnc2 | Galnc1 | Galnc2 |
| 13 STB3   | YDR169C   | YPDcl2 | YPDcl3 | EtOHcl1 | EtOHcl2 | Galcl1 | YPDnc1 | YPDnc2 | YPDnc3 | YPDnc4 | EtOHnc1 | EtOHnc2 | Galnc1 | Galnc2 |
| 13        | YBL094C   | YPDcl2 | YPDcl3 | EtOHcl1 | EtOHcl2 | Galcl1 | YPDnc1 | YPDnc2 | YPDnc3 | YPDnc4 | EtOHnc1 | EtOHnc2 | Galnc1 | Galnc2 |
| 13        | YGL177W   | YPDcl2 | YPDcl3 | EtOHcl1 | EtOHcl2 | Galcl1 | YPDnc1 | YPDnc2 | YPDnc3 | YPDnc4 | EtOHnc1 | EtOHnc2 | Galnc1 | Galnc2 |
| 13        | YDR333C   | YPDcl2 | YPDcl3 | EtOHcl1 | EtOHcl2 | Galcl1 | YPDnc1 | YPDnc2 | YPDnc3 | YPDnc4 | EtOHnc1 | EtOHnc2 | Galnc1 | Galnc2 |
| 13        | YDR124W   | YPDcl2 | YPDcl3 | EtOHcl1 | EtOHcl2 | Galcl1 | YPDnc1 | YPDnc2 | YPDnc3 | YPDnc4 | EtOHnc1 | EtOHnc2 | Galnc1 | Galnc2 |
| 13 OPI7   | YDR360W   | YPDcl2 | YPDcl3 | EtOHcl1 | EtOHcl2 | Galcl1 | YPDnc1 | YPDnc2 | YPDnc3 | YPDnc4 | EtOHnc1 | EtOHnc2 | Galnc1 | Galnc2 |
| 13        | YDR115W   | YPDcl2 | YPDcl3 | EtOHcl1 | EtOHcl2 | Galcl1 | YPDnc1 | YPDnc2 | YPDnc3 | YPDnc4 | EtOHnc1 | EtOHnc2 | Galnc1 | Galnc2 |
| 13 AGC1   | YPR021C   | YPDcl2 | YPDcl3 | EtOHcl1 | EtOHcl2 | Galcl1 | YPDnc1 | YPDnc2 | YPDnc3 | YPDnc4 | EtOHnc1 | EtOHnc2 | Galnc1 | Galnc2 |
| 13 GND2   | YGR256W   | YPDcl2 | YPDcl3 | EtOHcl1 | EtOHcl2 | Galcl1 | YPDnc1 | YPDnc2 | YPDnc3 | YPDnc4 | EtOHnc1 | EtOHnc2 | Galnc1 | Galnc2 |
| 13 PCK1   | YKR097W   | YPDcl2 | YPDcl3 | EtOHcl1 | EtOHcl2 | Galcl1 | YPDnc1 | YPDnc2 | YPDnc3 | YPDnc4 | EtOHnc1 | EtOHnc2 | Galnc1 | Galnc2 |
| 13        | YOL038C-A | YPDcl2 | YPDcl3 | EtOHcl1 | EtOHcl2 | Galcl1 | YPDnc1 | YPDnc2 | YPDnc3 | YPDnc4 | EtOHnc1 | EtOHnc2 | Galnc1 | Galnc2 |
| 13 YHP1   | YDR451C   | YPDcl2 | YPDcl3 | EtOHcl1 | EtOHcl2 | Galcl1 | YPDnc1 | YPDnc2 | YPDnc3 | YPDnc4 | EtOHnc1 | EtOHnc2 | Galnc1 | Galnc2 |
| 13 VAC17  | YCL063W   | YPDcl2 | YPDcl3 | EtOHcl1 | EtOHcl2 | Galcl1 | YPDnc1 | YPDnc2 | YPDnc3 | YPDnc4 | EtOHnc1 | EtOHnc2 | Galnc1 | Galnc2 |
| 13        | YHR177W   | YPDcl2 | YPDcl3 | EtOHcl1 | EtOHcl2 | Galcl1 | YPDnc1 | YPDnc2 | YPDnc3 | YPDnc4 | EtOHnc1 | EtOHnc2 | Galnc1 | Galnc2 |
| 13 ATP3   | YBR039W   | YPDcl2 | YPDcl3 | EtOHcl1 | EtOHcl2 | Galcl1 | YPDnc1 | YPDnc2 | YPDnc3 | YPDnc4 | EtOHnc1 | EtOHnc2 | Galnc1 | Galnc2 |
| 13 DAL1   | YIR027C   | YPDcl2 | YPDcl3 | EtOHcl1 | EtOHcl2 | Galcl1 | YPDnc1 | YPDnc2 | YPDnc3 | YPDnc4 | EtOHnc1 | EtOHnc2 | Galnc1 | Galnc2 |
| 13        | YGL214W   | YPDcl2 | YPDcl3 | EtOHcl1 | EtOHcl2 | Galcl1 | YPDnc1 | YPDnc2 | YPDnc3 | YPDnc4 | EtOHnc1 | EtOHnc2 | Galnc1 | Galnc2 |
| 13        | YER023C-A | YPDcl2 | YPDcl3 | EtOHcl1 | EtOHcl2 | Galcl1 | YPDnc1 | YPDnc2 | YPDnc3 | YPDnc4 | EtOHnc1 | EtOHnc2 | Galnc1 | Galnc2 |
| 13 ERV46  | YAL042W   | YPDcl2 | YPDcl3 | EtOHcl1 | EtOHcl2 | Galcl1 | YPDnc1 | YPDnc2 | YPDnc3 | YPDnc4 | EtOHnc1 | EtOHnc2 | Galnc1 | Galnc2 |
| 13 NAS2   | YIL007C   | YPDcl2 | YPDcl3 | EtOHcl1 | EtOHcl2 | Galcl1 | YPDnc1 | YPDnc2 | YPDnc3 | YPDnc4 | EtOHnc1 | EtOHnc2 | Galnc1 | Galnc2 |
| 13 SVP26  | YHR181W   | YPDcl2 | YPDcl3 | EtOHcl1 | EtOHcl2 | Galcl1 | YPDnc1 | YPDnc2 | YPDnc3 | YPDnc4 | EtOHnc1 | EtOHnc2 | Galnc1 | Galnc2 |
| 13 ZRC1   | YMR243C   | YPDcl2 | YPDcl3 | EtOHcl1 | EtOHcl2 | Galcl1 | YPDnc1 | YPDnc2 | YPDnc3 | YPDnc4 | EtOHnc1 | EtOHnc2 | Galnc1 | Galnc2 |
| 13 CCT6   | YDR188W   | YPDcl2 | YPDcl3 | EtOHcl1 | EtOHcl2 | Galcl1 | YPDnc1 | YPDnc2 | YPDnc3 | YPDnc4 | EtOHnc1 | EtOHnc2 | Galnc1 | Galnc2 |



|    |           |         |        |         |         |         |        |        |        |        |         |         |         |        |        |
|----|-----------|---------|--------|---------|---------|---------|--------|--------|--------|--------|---------|---------|---------|--------|--------|
| 13 | YNR034W-  | YPDcl2  | YPDcl3 | EtOHcl1 | EtOHcl2 | Galcl1  | YPDnc1 | YPDnc2 | YPDnc3 | YPDnc4 | EtOHnc1 | EtOHnc2 | Galnc1  | Galnc2 |        |
| 13 | YEL023C   | YPDcl2  | YPDcl3 | EtOHcl1 | EtOHcl2 | Galcl1  | YPDnc1 | YPDnc2 | YPDnc3 | YPDnc4 | EtOHnc1 | EtOHnc2 | Galnc1  | Galnc2 |        |
| 13 | YNL057W   | YPDcl2  | YPDcl3 | EtOHcl1 | EtOHcl2 | Galcl1  | YPDnc1 | YPDnc2 | YPDnc3 | YPDnc4 | EtOHnc1 | EtOHnc2 | Galnc1  | Galnc2 |        |
| 13 | KAR3      | YPR141C | YPDcl2 | YPDcl3  | EtOHcl1 | EtOHcl2 | Galcl1 | YPDnc1 | YPDnc2 | YPDnc3 | YPDnc4  | EtOHnc1 | EtOHnc2 | Galnc1 | Galnc2 |
| 13 | YJR061W   | YPDcl2  | YPDcl3 | EtOHcl1 | EtOHcl2 | Galcl1  | YPDnc1 | YPDnc2 | YPDnc3 | YPDnc4 | EtOHnc1 | EtOHnc2 | Galnc1  | Galnc2 |        |
| 13 | GRC3      | YLL035W | YPDcl2 | YPDcl3  | EtOHcl1 | EtOHcl2 | Galcl1 | YPDnc1 | YPDnc2 | YPDnc3 | YPDnc4  | EtOHnc1 | EtOHnc2 | Galnc1 | Galnc2 |
| 13 | SPP382    | YLR424W | YPDcl2 | YPDcl3  | EtOHcl1 | EtOHcl2 | Galcl1 | YPDnc1 | YPDnc2 | YPDnc3 | YPDnc4  | EtOHnc1 | EtOHnc2 | Galnc1 | Galnc2 |
| 13 | ALG7      | YBR243C | YPDcl2 | YPDcl3  | EtOHcl1 | EtOHcl2 | Galcl1 | YPDnc1 | YPDnc2 | YPDnc3 | YPDnc4  | EtOHnc1 | EtOHnc2 | Galnc1 | Galnc2 |
| 13 | VID27     | YNL212W | YPDcl2 | YPDcl3  | EtOHcl1 | EtOHcl2 | Galcl1 | YPDnc1 | YPDnc2 | YPDnc3 | YPDnc4  | EtOHnc1 | EtOHnc2 | Galnc1 | Galnc2 |
| 13 | RNH1      | YMR234W | YPDcl2 | YPDcl3  | EtOHcl1 | EtOHcl2 | Galcl1 | YPDnc1 | YPDnc2 | YPDnc3 | YPDnc4  | EtOHnc1 | EtOHnc2 | Galnc1 | Galnc2 |
| 13 | YJL026C-A | YPDcl2  | YPDcl3 | EtOHcl1 | EtOHcl2 | Galcl1  | YPDnc1 | YPDnc2 | YPDnc3 | YPDnc4 | EtOHnc1 | EtOHnc2 | Galnc1  | Galnc2 |        |
| 13 | MED11     | YMR112C | YPDcl2 | YPDcl3  | EtOHcl1 | EtOHcl2 | Galcl1 | YPDnc1 | YPDnc2 | YPDnc3 | YPDnc4  | EtOHnc1 | EtOHnc2 | Galnc1 | Galnc2 |
| 13 | LCB3      | YJL134W | YPDcl2 | YPDcl3  | EtOHcl1 | EtOHcl2 | Galcl1 | YPDnc1 | YPDnc2 | YPDnc3 | YPDnc4  | EtOHnc1 | EtOHnc2 | Galnc1 | Galnc2 |
| 13 | YOR105W   | YPDcl2  | YPDcl3 | EtOHcl1 | EtOHcl2 | Galcl1  | YPDnc1 | YPDnc2 | YPDnc3 | YPDnc4 | EtOHnc1 | EtOHnc2 | Galnc1  | Galnc2 |        |
| 13 | YJL127C-B | YPDcl2  | YPDcl3 | EtOHcl1 | EtOHcl2 | Galcl1  | YPDnc1 | YPDnc2 | YPDnc3 | YPDnc4 | EtOHnc1 | EtOHnc2 | Galnc1  | Galnc2 |        |
| 13 | SNF12     | YNR023W | YPDcl2 | YPDcl3  | EtOHcl1 | EtOHcl2 | Galcl1 | YPDnc1 | YPDnc2 | YPDnc3 | YPDnc4  | EtOHnc1 | EtOHnc2 | Galnc1 | Galnc2 |
| 13 | VPS41     | YDR080W | YPDcl2 | YPDcl3  | EtOHcl1 | EtOHcl2 | Galcl1 | YPDnc1 | YPDnc2 | YPDnc3 | YPDnc4  | EtOHnc1 | EtOHnc2 | Galnc1 | Galnc2 |
| 13 | YHR073C-B | YPDcl2  | YPDcl3 | EtOHcl1 | EtOHcl2 | Galcl1  | YPDnc1 | YPDnc2 | YPDnc3 | YPDnc4 | EtOHnc1 | EtOHnc2 | Galnc1  | Galnc2 |        |
| 13 | YBR096W   | YPDcl2  | YPDcl3 | EtOHcl1 | EtOHcl2 | Galcl1  | YPDnc1 | YPDnc2 | YPDnc3 | YPDnc4 | EtOHnc1 | EtOHnc2 | Galnc1  | Galnc2 |        |
| 13 | NUP85     | YJR042W | YPDcl2 | YPDcl3  | EtOHcl1 | EtOHcl2 | Galcl1 | YPDnc1 | YPDnc2 | YPDnc3 | YPDnc4  | EtOHnc1 | EtOHnc2 | Galnc1 | Galnc2 |
| 13 | SMD1      | YGR074W | YPDcl2 | YPDcl3  | EtOHcl1 | EtOHcl2 | Galcl1 | YPDnc1 | YPDnc2 | YPDnc3 | YPDnc4  | EtOHnc1 | EtOHnc2 | Galnc1 | Galnc2 |
| 13 | YDR089W   | YPDcl2  | YPDcl3 | EtOHcl1 | EtOHcl2 | Galcl1  | YPDnc1 | YPDnc2 | YPDnc3 | YPDnc4 | EtOHnc1 | EtOHnc2 | Galnc1  | Galnc2 |        |
| 13 | ATG1      | YGL180W | YPDcl2 | YPDcl3  | EtOHcl1 | EtOHcl2 | Galcl1 | YPDnc1 | YPDnc2 | YPDnc3 | YPDnc4  | EtOHnc1 | EtOHnc2 | Galnc1 | Galnc2 |
| 13 | MRPS9     | YBR146W | YPDcl2 | YPDcl3  | EtOHcl1 | EtOHcl2 | Galcl1 | YPDnc1 | YPDnc2 | YPDnc3 | YPDnc4  | EtOHnc1 | EtOHnc2 | Galnc1 | Galnc2 |
| 13 | KCS1      | YDR017C | YPDcl2 | YPDcl3  | EtOHcl1 | EtOHcl2 | Galcl1 | YPDnc1 | YPDnc2 | YPDnc3 | YPDnc4  | EtOHnc1 | EtOHnc2 | Galnc1 | Galnc2 |
| 13 | AFR1      | YDR085C | YPDcl2 | YPDcl3  | EtOHcl1 | EtOHcl2 | Galcl1 | YPDnc1 | YPDnc2 | YPDnc3 | YPDnc4  | EtOHnc1 | EtOHnc2 | Galnc1 | Galnc2 |
| 13 | YKL053W   | YPDcl2  | YPDcl3 | EtOHcl1 | EtOHcl2 | Galcl1  | YPDnc1 | YPDnc2 | YPDnc3 | YPDnc4 | EtOHnc1 | EtOHnc2 | Galnc1  | Galnc2 |        |
| 13 | DIA4      | YHR011W | YPDcl2 | YPDcl3  | EtOHcl1 | EtOHcl2 | Galcl1 | YPDnc1 | YPDnc2 | YPDnc3 | YPDnc4  | EtOHnc1 | EtOHnc2 | Galnc1 | Galnc2 |
| 13 | YPD1      | YDL235C | YPDcl2 | YPDcl3  | EtOHcl1 | EtOHcl2 | Galcl1 | YPDnc1 | YPDnc2 | YPDnc3 | YPDnc4  | EtOHnc1 | EtOHnc2 | Galnc1 | Galnc2 |
| 13 | FRT2      | YAL028W | YPDcl2 | YPDcl3  | EtOHcl1 | EtOHcl2 | Galcl1 | YPDnc1 | YPDnc2 | YPDnc3 | YPDnc4  | EtOHnc1 | EtOHnc2 | Galnc1 | Galnc2 |
| 13 | NHP10     | YDL002C | YPDcl2 | YPDcl3  | EtOHcl1 | EtOHcl2 | Galcl1 | YPDnc1 | YPDnc2 | YPDnc3 | YPDnc4  | EtOHnc1 | EtOHnc2 | Galnc1 | Galnc2 |
| 13 | YJL213W   | YPDcl2  | YPDcl3 | EtOHcl1 | EtOHcl2 | Galcl1  | YPDnc1 | YPDnc2 | YPDnc3 | YPDnc4 | EtOHnc1 | EtOHnc2 | Galnc1  | Galnc2 |        |
| 13 | MDG1      | YNL173C | YPDcl2 | YPDcl3  | EtOHcl1 | EtOHcl2 | Galcl1 | YPDnc1 | YPDnc2 | YPDnc3 | YPDnc4  | EtOHnc1 | EtOHnc2 | Galnc1 | Galnc2 |
| 13 | SKY1      | YMR216C | YPDcl2 | YPDcl3  | EtOHcl1 | EtOHcl2 | Galcl1 | YPDnc1 | YPDnc2 | YPDnc3 | YPDnc4  | EtOHnc1 | EtOHnc2 | Galnc1 | Galnc2 |

|           |           |        |        |         |         |        |        |        |        |        |         |         |        |        |
|-----------|-----------|--------|--------|---------|---------|--------|--------|--------|--------|--------|---------|---------|--------|--------|
| 13 SPH1   | YLR313C   | YPDcl2 | YPDcl3 | EtOHcl1 | EtOHcl2 | Galcl1 | YPDnc1 | YPDnc2 | YPDnc3 | YPDnc4 | EtOHnc1 | EtOHnc2 | Galnc1 | Galnc2 |
| 13        | YER039C-A | YPDcl2 | YPDcl3 | EtOHcl1 | EtOHcl2 | Galcl1 | YPDnc1 | YPDnc2 | YPDnc3 | YPDnc4 | EtOHnc1 | EtOHnc2 | Galnc1 | Galnc2 |
| 13        | YJL009W   | YPDcl2 | YPDcl3 | EtOHcl1 | EtOHcl2 | Galcl1 | YPDnc1 | YPDnc2 | YPDnc3 | YPDnc4 | EtOHnc1 | EtOHnc2 | Galnc1 | Galnc2 |
| 13        | YBR085C-A | YPDcl2 | YPDcl3 | EtOHcl1 | EtOHcl2 | Galcl1 | YPDnc1 | YPDnc2 | YPDnc3 | YPDnc4 | EtOHnc1 | EtOHnc2 | Galnc1 | Galnc2 |
| 13 RAD59  | YDL059C   | YPDcl2 | YPDcl3 | EtOHcl1 | EtOHcl2 | Galcl1 | YPDnc1 | YPDnc2 | YPDnc3 | YPDnc4 | EtOHnc1 | EtOHnc2 | Galnc1 | Galnc2 |
| 13 TDA4   | YJR116W   | YPDcl2 | YPDcl3 | EtOHcl1 | EtOHcl2 | Galcl1 | YPDnc1 | YPDnc2 | YPDnc3 | YPDnc4 | EtOHnc1 | EtOHnc2 | Galnc1 | Galnc2 |
| 13 RDH54  | YBR073W   | YPDcl2 | YPDcl3 | EtOHcl1 | EtOHcl2 | Galcl1 | YPDnc1 | YPDnc2 | YPDnc3 | YPDnc4 | EtOHnc1 | EtOHnc2 | Galnc1 | Galnc2 |
| 13        | YPR064W   | YPDcl2 | YPDcl3 | EtOHcl1 | EtOHcl2 | Galcl1 | YPDnc1 | YPDnc2 | YPDnc3 | YPDnc4 | EtOHnc1 | EtOHnc2 | Galnc1 | Galnc2 |
| 13 ASM4   | YDL088C   | YPDcl2 | YPDcl3 | EtOHcl1 | EtOHcl2 | Galcl1 | YPDnc1 | YPDnc2 | YPDnc3 | YPDnc4 | EtOHnc1 | EtOHnc2 | Galnc1 | Galnc2 |
| 13 CBK1   | YNL161W   | YPDcl2 | YPDcl3 | EtOHcl1 | EtOHcl2 | Galcl1 | YPDnc1 | YPDnc2 | YPDnc3 | YPDnc4 | EtOHnc1 | EtOHnc2 | Galnc1 | Galnc2 |
| 13 PPM1   | YDR435C   | YPDcl2 | YPDcl3 | EtOHcl1 | EtOHcl2 | Galcl1 | YPDnc1 | YPDnc2 | YPDnc3 | YPDnc4 | EtOHnc1 | EtOHnc2 | Galnc1 | Galnc2 |
| 13 JIP3   | YLR331C   | YPDcl2 | YPDcl3 | EtOHcl1 | EtOHcl2 | Galcl1 | YPDnc1 | YPDnc2 | YPDnc3 | YPDnc4 | EtOHnc1 | EtOHnc2 | Galnc1 | Galnc2 |
| 13 RPL19A | YBR084C-A | YPDcl2 | YPDcl3 | EtOHcl1 | EtOHcl2 | Galcl1 | YPDnc1 | YPDnc2 | YPDnc3 | YPDnc4 | EtOHnc1 | EtOHnc2 | Galnc1 | Galnc2 |
| 13        | YDR161W   | YPDcl2 | YPDcl3 | EtOHcl1 | EtOHcl2 | Galcl1 | YPDnc1 | YPDnc2 | YPDnc3 | YPDnc4 | EtOHnc1 | EtOHnc2 | Galnc1 | Galnc2 |
| 13        | YOR285W   | YPDcl2 | YPDcl3 | EtOHcl1 | EtOHcl2 | Galcl1 | YPDnc1 | YPDnc2 | YPDnc3 | YPDnc4 | EtOHnc1 | EtOHnc2 | Galnc1 | Galnc2 |
| 13        | YLR253W   | YPDcl2 | YPDcl3 | EtOHcl1 | EtOHcl2 | Galcl1 | YPDnc1 | YPDnc2 | YPDnc3 | YPDnc4 | EtOHnc1 | EtOHnc2 | Galnc1 | Galnc2 |
| 13 PRE3   | YJL001W   | YPDcl2 | YPDcl3 | EtOHcl1 | EtOHcl2 | Galcl1 | YPDnc1 | YPDnc2 | YPDnc3 | YPDnc4 | EtOHnc1 | EtOHnc2 | Galnc1 | Galnc2 |
| 13 HIF1   | YLL022C   | YPDcl2 | YPDcl3 | EtOHcl1 | EtOHcl2 | Galcl1 | YPDnc1 | YPDnc2 | YPDnc3 | YPDnc4 | EtOHnc1 | EtOHnc2 | Galnc1 | Galnc2 |
| 13 HTD2   | YHR067W   | YPDcl2 | YPDcl3 | EtOHcl1 | EtOHcl2 | Galcl1 | YPDnc1 | YPDnc2 | YPDnc3 | YPDnc4 | EtOHnc1 | EtOHnc2 | Galnc1 | Galnc2 |
| 13 HAP2   | YGL237C   | YPDcl2 | YPDcl3 | EtOHcl1 | EtOHcl2 | Galcl1 | YPDnc1 | YPDnc2 | YPDnc3 | YPDnc4 | EtOHnc1 | EtOHnc2 | Galnc1 | Galnc2 |
| 13 TCM62  | YBR044C   | YPDcl2 | YPDcl3 | EtOHcl1 | EtOHcl2 | Galcl1 | YPDnc1 | YPDnc2 | YPDnc3 | YPDnc4 | EtOHnc1 | EtOHnc2 | Galnc1 | Galnc2 |
| 13 RGR1   | YLR071C   | YPDcl2 | YPDcl3 | EtOHcl1 | EtOHcl2 | Galcl1 | YPDnc1 | YPDnc2 | YPDnc3 | YPDnc4 | EtOHnc1 | EtOHnc2 | Galnc1 | Galnc2 |
| 13 TRM1   | YDR120C   | YPDcl2 | YPDcl3 | EtOHcl1 | EtOHcl2 | Galcl1 | YPDnc1 | YPDnc2 | YPDnc3 | YPDnc4 | EtOHnc1 | EtOHnc2 | Galnc1 | Galnc2 |
| 13 NSA2   | YER126C   | YPDcl2 | YPDcl3 | EtOHcl1 | EtOHcl2 | Galcl1 | YPDnc1 | YPDnc2 | YPDnc3 | YPDnc4 | EtOHnc1 | EtOHnc2 | Galnc1 | Galnc2 |
| 13 PHO85  | YPL031C   | YPDcl2 | YPDcl3 | EtOHcl1 | EtOHcl2 | Galcl1 | YPDnc1 | YPDnc2 | YPDnc3 | YPDnc4 | EtOHnc1 | EtOHnc2 | Galnc1 | Galnc2 |
| 13 SAP185 | YJL098W   | YPDcl2 | YPDcl3 | EtOHcl1 | EtOHcl2 | Galcl1 | YPDnc1 | YPDnc2 | YPDnc3 | YPDnc4 | EtOHnc1 | EtOHnc2 | Galnc1 | Galnc2 |
| 13        | YDR445C   | YPDcl2 | YPDcl3 | EtOHcl1 | EtOHcl2 | Galcl1 | YPDnc1 | YPDnc2 | YPDnc3 | YPDnc4 | EtOHnc1 | EtOHnc2 | Galnc1 | Galnc2 |
| 13 AKL1   | YBR059C   | YPDcl2 | YPDcl3 | EtOHcl1 | EtOHcl2 | Galcl1 | YPDnc1 | YPDnc2 | YPDnc3 | YPDnc4 | EtOHnc1 | EtOHnc2 | Galnc1 | Galnc2 |
| 13 VMA7   | YGR020C   | YPDcl2 | YPDcl3 | EtOHcl1 | EtOHcl2 | Galcl1 | YPDnc1 | YPDnc2 | YPDnc3 | YPDnc4 | EtOHnc1 | EtOHnc2 | Galnc1 | Galnc2 |
| 13 SMA2   | YML066C   | YPDcl2 | YPDcl3 | EtOHcl1 | EtOHcl2 | Galcl1 | YPDnc1 | YPDnc2 | YPDnc3 | YPDnc4 | EtOHnc1 | EtOHnc2 | Galnc1 | Galnc2 |
| 13 PLM2   | YDR501W   | YPDcl2 | YPDcl3 | EtOHcl1 | EtOHcl2 | Galcl1 | YPDnc1 | YPDnc2 | YPDnc3 | YPDnc4 | EtOHnc1 | EtOHnc2 | Galnc1 | Galnc2 |
| 13 TOP2   | YNL088W   | YPDcl2 | YPDcl3 | EtOHcl1 | EtOHcl2 | Galcl1 | YPDnc1 | YPDnc2 | YPDnc3 | YPDnc4 | EtOHnc1 | EtOHnc2 | Galnc1 | Galnc2 |
| 13 MSG5   | YNL053W   | YPDcl2 | YPDcl3 | EtOHcl1 | EtOHcl2 | Galcl1 | YPDnc1 | YPDnc2 | YPDnc3 | YPDnc4 | EtOHnc1 | EtOHnc2 | Galnc1 | Galnc2 |
| 13        | YKR043C   | YPDcl2 | YPDcl3 | EtOHcl1 | EtOHcl2 | Galcl1 | YPDnc1 | YPDnc2 | YPDnc3 | YPDnc4 | EtOHnc1 | EtOHnc2 | Galnc1 | Galnc2 |

|           |         |        |        |         |         |        |        |        |        |        |         |         |        |        |
|-----------|---------|--------|--------|---------|---------|--------|--------|--------|--------|--------|---------|---------|--------|--------|
| 13 ECM34  | YHL043W | YPDcl2 | YPDcl3 | EtOHcl1 | EtOHcl2 | Galcl1 | YPDnc1 | YPDnc2 | YPDnc3 | YPDnc4 | EtOHnc1 | EtOHnc2 | Galnc1 | Galnc2 |
| 13 UTP7   | YER082C | YPDcl2 | YPDcl3 | EtOHcl1 | EtOHcl2 | Galcl1 | YPDnc1 | YPDnc2 | YPDnc3 | YPDnc4 | EtOHnc1 | EtOHnc2 | Galnc1 | Galnc2 |
| 13 ATG18  | YFR021W | YPDcl2 | YPDcl3 | EtOHcl1 | EtOHcl2 | Galcl1 | YPDnc1 | YPDnc2 | YPDnc3 | YPDnc4 | EtOHnc1 | EtOHnc2 | Galnc1 | Galnc2 |
| 13 GTR1   | YML121W | YPDcl2 | YPDcl3 | EtOHcl1 | EtOHcl2 | Galcl1 | YPDnc1 | YPDnc2 | YPDnc3 | YPDnc4 | EtOHnc1 | EtOHnc2 | Galnc1 | Galnc2 |
| 13 LSC2   | YGR244C | YPDcl2 | YPDcl3 | EtOHcl1 | EtOHcl2 | Galcl1 | YPDnc1 | YPDnc2 | YPDnc3 | YPDnc4 | EtOHnc1 | EtOHnc2 | Galnc1 | Galnc2 |
| 13 ZRT1   | YGL255W | YPDcl2 | YPDcl3 | EtOHcl1 | EtOHcl2 | Galcl1 | YPDnc1 | YPDnc2 | YPDnc3 | YPDnc4 | EtOHnc1 | EtOHnc2 | Galnc1 | Galnc2 |
| 13 NCE103 | YNL036W | YPDcl2 | YPDcl3 | EtOHcl1 | EtOHcl2 | Galcl1 | YPDnc1 | YPDnc2 | YPDnc3 | YPDnc4 | EtOHnc1 | EtOHnc2 | Galnc1 | Galnc2 |
| 13 INM1   | YHR046C | YPDcl2 | YPDcl3 | EtOHcl1 | EtOHcl2 | Galcl1 | YPDnc1 | YPDnc2 | YPDnc3 | YPDnc4 | EtOHnc1 | EtOHnc2 | Galnc1 | Galnc2 |
| 13 ERP4   | YOR016C | YPDcl2 | YPDcl3 | EtOHcl1 | EtOHcl2 | Galcl1 | YPDnc1 | YPDnc2 | YPDnc3 | YPDnc4 | EtOHnc1 | EtOHnc2 | Galnc1 | Galnc2 |
| 13 DRE2   | YKR071C | YPDcl2 | YPDcl3 | EtOHcl1 | EtOHcl2 | Galcl1 | YPDnc1 | YPDnc2 | YPDnc3 | YPDnc4 | EtOHnc1 | EtOHnc2 | Galnc1 | Galnc2 |
| 13 SPT4   | YGR063C | YPDcl2 | YPDcl3 | EtOHcl1 | EtOHcl2 | Galcl1 | YPDnc1 | YPDnc2 | YPDnc3 | YPDnc4 | EtOHnc1 | EtOHnc2 | Galnc1 | Galnc2 |
| 13 ORC1   | YML065W | YPDcl2 | YPDcl3 | EtOHcl1 | EtOHcl2 | Galcl1 | YPDnc1 | YPDnc2 | YPDnc3 | YPDnc4 | EtOHnc1 | EtOHnc2 | Galnc1 | Galnc2 |
| 13 HAL1   | YPR005C | YPDcl2 | YPDcl3 | EtOHcl1 | EtOHcl2 | Galcl1 | YPDnc1 | YPDnc2 | YPDnc3 | YPDnc4 | EtOHnc1 | EtOHnc2 | Galnc1 | Galnc2 |
| 13 HSV2   | YGR223C | YPDcl2 | YPDcl3 | EtOHcl1 | EtOHcl2 | Galcl1 | YPDnc1 | YPDnc2 | YPDnc3 | YPDnc4 | EtOHnc1 | EtOHnc2 | Galnc1 | Galnc2 |
| 13 SWD1   | YAR003W | YPDcl2 | YPDcl3 | EtOHcl1 | EtOHcl2 | Galcl1 | YPDnc1 | YPDnc2 | YPDnc3 | YPDnc4 | EtOHnc1 | EtOHnc2 | Galnc1 | Galnc2 |
| 13 PPA2   | YMR267W | YPDcl2 | YPDcl3 | EtOHcl1 | EtOHcl2 | Galcl1 | YPDnc1 | YPDnc2 | YPDnc3 | YPDnc4 | EtOHnc1 | EtOHnc2 | Galnc1 | Galnc2 |
| 13 NOG1   | YPL093W | YPDcl2 | YPDcl3 | EtOHcl1 | EtOHcl2 | Galcl1 | YPDnc1 | YPDnc2 | YPDnc3 | YPDnc4 | EtOHnc1 | EtOHnc2 | Galnc1 | Galnc2 |
| 13 APJ1   | YNL077W | YPDcl2 | YPDcl3 | EtOHcl1 | EtOHcl2 | Galcl1 | YPDnc1 | YPDnc2 | YPDnc3 | YPDnc4 | EtOHnc1 | EtOHnc2 | Galnc1 | Galnc2 |
| 13 PET191 | YJR034W | YPDcl2 | YPDcl3 | EtOHcl1 | EtOHcl2 | Galcl1 | YPDnc1 | YPDnc2 | YPDnc3 | YPDnc4 | EtOHnc1 | EtOHnc2 | Galnc1 | Galnc2 |
| 13 CDC60  | YPL160W | YPDcl2 | YPDcl3 | EtOHcl1 | EtOHcl2 | Galcl1 | YPDnc1 | YPDnc2 | YPDnc3 | YPDnc4 | EtOHnc1 | EtOHnc2 | Galnc1 | Galnc2 |
| 13        | YGL185C | YPDcl2 | YPDcl3 | EtOHcl1 | EtOHcl2 | Galcl1 | YPDnc1 | YPDnc2 | YPDnc3 | YPDnc4 | EtOHnc1 | EtOHnc2 | Galnc1 | Galnc2 |
| 13 ZRT3   | YKL175W | YPDcl2 | YPDcl3 | EtOHcl1 | EtOHcl2 | Galcl1 | YPDnc1 | YPDnc2 | YPDnc3 | YPDnc4 | EtOHnc1 | EtOHnc2 | Galnc1 | Galnc2 |
| 13 NHX1   | YDR456W | YPDcl2 | YPDcl3 | EtOHcl1 | EtOHcl2 | Galcl1 | YPDnc1 | YPDnc2 | YPDnc3 | YPDnc4 | EtOHnc1 | EtOHnc2 | Galnc1 | Galnc2 |
| 13 COG7   | YGL005C | YPDcl2 | YPDcl3 | EtOHcl1 | EtOHcl2 | Galcl1 | YPDnc1 | YPDnc2 | YPDnc3 | YPDnc4 | EtOHnc1 | EtOHnc2 | Galnc1 | Galnc2 |
| 13 ESBP6  | YNL125C | YPDcl2 | YPDcl3 | EtOHcl1 | EtOHcl2 | Galcl1 | YPDnc1 | YPDnc2 | YPDnc3 | YPDnc4 | EtOHnc1 | EtOHnc2 | Galnc1 | Galnc2 |
| 13 QDR3   | YBR043C | YPDcl2 | YPDcl3 | EtOHcl1 | EtOHcl2 | Galcl1 | YPDnc1 | YPDnc2 | YPDnc3 | YPDnc4 | EtOHnc1 | EtOHnc2 | Galnc1 | Galnc2 |
| 13 BRE4   | YDL231C | YPDcl2 | YPDcl3 | EtOHcl1 | EtOHcl2 | Galcl1 | YPDnc1 | YPDnc2 | YPDnc3 | YPDnc4 | EtOHnc1 | EtOHnc2 | Galnc1 | Galnc2 |
| 13 RFC4   | YOL094C | YPDcl2 | YPDcl3 | EtOHcl1 | EtOHcl2 | Galcl1 | YPDnc1 | YPDnc2 | YPDnc3 | YPDnc4 | EtOHnc1 | EtOHnc2 | Galnc1 | Galnc2 |
| 13 VPS20  | YMR077C | YPDcl2 | YPDcl3 | EtOHcl1 | EtOHcl2 | Galcl1 | YPDnc1 | YPDnc2 | YPDnc3 | YPDnc4 | EtOHnc1 | EtOHnc2 | Galnc1 | Galnc2 |
| 13 COY1   | YKL179C | YPDcl2 | YPDcl3 | EtOHcl1 | EtOHcl2 | Galcl1 | YPDnc1 | YPDnc2 | YPDnc3 | YPDnc4 | EtOHnc1 | EtOHnc2 | Galnc1 | Galnc2 |
| 13 PRP19  | YLL036C | YPDcl2 | YPDcl3 | EtOHcl1 | EtOHcl2 | Galcl1 | YPDnc1 | YPDnc2 | YPDnc3 | YPDnc4 | EtOHnc1 | EtOHnc2 | Galnc1 | Galnc2 |
| 13 BAS1   | YKR099W | YPDcl2 | YPDcl3 | EtOHcl1 | EtOHcl2 | Galcl1 | YPDnc1 | YPDnc2 | YPDnc3 | YPDnc4 | EtOHnc1 | EtOHnc2 | Galnc1 | Galnc2 |
| 13 MED2   | YDL005C | YPDcl2 | YPDcl3 | EtOHcl1 | EtOHcl2 | Galcl1 | YPDnc1 | YPDnc2 | YPDnc3 | YPDnc4 | EtOHnc1 | EtOHnc2 | Galnc1 | Galnc2 |
| 13        | YOR146W | YPDcl2 | YPDcl3 | EtOHcl1 | EtOHcl2 | Galcl1 | YPDnc1 | YPDnc2 | YPDnc3 | YPDnc4 | EtOHnc1 | EtOHnc2 | Galnc1 | Galnc2 |

|           |           |        |        |         |         |        |        |        |        |        |         |         |        |        |
|-----------|-----------|--------|--------|---------|---------|--------|--------|--------|--------|--------|---------|---------|--------|--------|
| 13 MBP1   | YDL056W   | YPDcl2 | YPDcl3 | EtOHcl1 | EtOHcl2 | Galcl1 | YPDnc1 | YPDnc2 | YPDnc3 | YPDnc4 | EtOHnc1 | EtOHnc2 | Galnc1 | Galnc2 |
| 13 NDI1   | YML120C   | YPDcl2 | YPDcl3 | EtOHcl1 | EtOHcl2 | Galcl1 | YPDnc1 | YPDnc2 | YPDnc3 | YPDnc4 | EtOHnc1 | EtOHnc2 | Galnc1 | Galnc2 |
| 13 FRE5   | YOR384W   | YPDcl2 | YPDcl3 | EtOHcl1 | EtOHcl2 | Galcl1 | YPDnc1 | YPDnc2 | YPDnc3 | YPDnc4 | EtOHnc1 | EtOHnc2 | Galnc1 | Galnc2 |
| 13 DCP1   | YOL149W   | YPDcl2 | YPDcl3 | EtOHcl1 | EtOHcl2 | Galcl1 | YPDnc1 | YPDnc2 | YPDnc3 | YPDnc4 | EtOHnc1 | EtOHnc2 | Galnc1 | Galnc2 |
| 13 COX14  | YML129C   | YPDcl2 | YPDcl3 | EtOHcl1 | EtOHcl2 | Galcl1 | YPDnc1 | YPDnc2 | YPDnc3 | YPDnc4 | EtOHnc1 | EtOHnc2 | Galnc1 | Galnc2 |
| 13        | YIL059C   | YPDcl2 | YPDcl3 | EtOHcl1 | EtOHcl2 | Galcl1 | YPDnc1 | YPDnc2 | YPDnc3 | YPDnc4 | EtOHnc1 | EtOHnc2 | Galnc1 | Galnc2 |
| 13        | YBR220C   | YPDcl2 | YPDcl3 | EtOHcl1 | EtOHcl2 | Galcl1 | YPDnc1 | YPDnc2 | YPDnc3 | YPDnc4 | EtOHnc1 | EtOHnc2 | Galnc1 | Galnc2 |
| 13 ZPS1   | YOL154W   | YPDcl2 | YPDcl3 | EtOHcl1 | EtOHcl2 | Galcl1 | YPDnc1 | YPDnc2 | YPDnc3 | YPDnc4 | EtOHnc1 | EtOHnc2 | Galnc1 | Galnc2 |
| 13 BIO5   | YNR056C   | YPDcl2 | YPDcl3 | EtOHcl1 | EtOHcl2 | Galcl1 | YPDnc1 | YPDnc2 | YPDnc3 | YPDnc4 | EtOHnc1 | EtOHnc2 | Galnc1 | Galnc2 |
| 13 EGT2   | YNL327W   | YPDcl2 | YPDcl3 | EtOHcl1 | EtOHcl2 | Galcl1 | YPDnc1 | YPDnc2 | YPDnc3 | YPDnc4 | EtOHnc1 | EtOHnc2 | Galnc1 | Galnc2 |
| 13 ORT1   | YOR130C   | YPDcl2 | YPDcl3 | EtOHcl1 | EtOHcl2 | Galcl1 | YPDnc1 | YPDnc2 | YPDnc3 | YPDnc4 | EtOHnc1 | EtOHnc2 | Galnc1 | Galnc2 |
| 13        | YJL181W   | YPDcl2 | YPDcl3 | EtOHcl1 | EtOHcl2 | Galcl1 | YPDnc1 | YPDnc2 | YPDnc3 | YPDnc4 | EtOHnc1 | EtOHnc2 | Galnc1 | Galnc2 |
| 13 AIM43  | YPL099C   | YPDcl2 | YPDcl3 | EtOHcl1 | EtOHcl2 | Galcl1 | YPDnc1 | YPDnc2 | YPDnc3 | YPDnc4 | EtOHnc1 | EtOHnc2 | Galnc1 | Galnc2 |
| 13 ATG2   | YNL242W   | YPDcl2 | YPDcl3 | EtOHcl1 | EtOHcl2 | Galcl1 | YPDnc1 | YPDnc2 | YPDnc3 | YPDnc4 | EtOHnc1 | EtOHnc2 | Galnc1 | Galnc2 |
| 13 MON2   | YNL297C   | YPDcl2 | YPDcl3 | EtOHcl1 | EtOHcl2 | Galcl1 | YPDnc1 | YPDnc2 | YPDnc3 | YPDnc4 | EtOHnc1 | EtOHnc2 | Galnc1 | Galnc2 |
| 13 WBP1   | YEL002C   | YPDcl2 | YPDcl3 | EtOHcl1 | EtOHcl2 | Galcl1 | YPDnc1 | YPDnc2 | YPDnc3 | YPDnc4 | EtOHnc1 | EtOHnc2 | Galnc1 | Galnc2 |
| 13 SSY5   | YJL156C   | YPDcl2 | YPDcl3 | EtOHcl1 | EtOHcl2 | Galcl1 | YPDnc1 | YPDnc2 | YPDnc3 | YPDnc4 | EtOHnc1 | EtOHnc2 | Galnc1 | Galnc2 |
| 13        | YMR166C   | YPDcl2 | YPDcl3 | EtOHcl1 | EtOHcl2 | Galcl1 | YPDnc1 | YPDnc2 | YPDnc3 | YPDnc4 | EtOHnc1 | EtOHnc2 | Galnc1 | Galnc2 |
| 13 STE50  | YCL032W   | YPDcl2 | YPDcl3 | EtOHcl1 | EtOHcl2 | Galcl1 | YPDnc1 | YPDnc2 | YPDnc3 | YPDnc4 | EtOHnc1 | EtOHnc2 | Galnc1 | Galnc2 |
| 13        | YDR034C-A | YPDcl2 | YPDcl3 | EtOHcl1 | EtOHcl2 | Galcl1 | YPDnc1 | YPDnc2 | YPDnc3 | YPDnc4 | EtOHnc1 | EtOHnc2 | Galnc1 | Galnc2 |
| 13 MNN9   | YPL050C   | YPDcl2 | YPDcl3 | EtOHcl1 | EtOHcl2 | Galcl1 | YPDnc1 | YPDnc2 | YPDnc3 | YPDnc4 | EtOHnc1 | EtOHnc2 | Galnc1 | Galnc2 |
| 13 SMT3   | YDR510W   | YPDcl2 | YPDcl3 | EtOHcl1 | EtOHcl2 | Galcl1 | YPDnc1 | YPDnc2 | YPDnc3 | YPDnc4 | EtOHnc1 | EtOHnc2 | Galnc1 | Galnc2 |
| 13        | YER158W-  | YPDcl2 | YPDcl3 | EtOHcl1 | EtOHcl2 | Galcl1 | YPDnc1 | YPDnc2 | YPDnc3 | YPDnc4 | EtOHnc1 | EtOHnc2 | Galnc1 | Galnc2 |
| 13        | YPL277C   | YPDcl2 | YPDcl3 | EtOHcl1 | EtOHcl2 | Galcl1 | YPDnc1 | YPDnc2 | YPDnc3 | YPDnc4 | EtOHnc1 | EtOHnc2 | Galnc1 | Galnc2 |
| 13        | YBR116C   | YPDcl2 | YPDcl3 | EtOHcl1 | EtOHcl2 | Galcl1 | YPDnc1 | YPDnc2 | YPDnc3 | YPDnc4 | EtOHnc1 | EtOHnc2 | Galnc1 | Galnc2 |
| 13        | YPL257W   | YPDcl2 | YPDcl3 | EtOHcl1 | EtOHcl2 | Galcl1 | YPDnc1 | YPDnc2 | YPDnc3 | YPDnc4 | EtOHnc1 | EtOHnc2 | Galnc1 | Galnc2 |
| 13 PUT1   | YLR142W   | YPDcl2 | YPDcl3 | EtOHcl1 | EtOHcl2 | Galcl1 | YPDnc1 | YPDnc2 | YPDnc3 | YPDnc4 | EtOHnc1 | EtOHnc2 | Galnc1 | Galnc2 |
| 13 SSU72  | YNL222W   | YPDcl2 | YPDcl3 | EtOHcl1 | EtOHcl2 | Galcl1 | YPDnc1 | YPDnc2 | YPDnc3 | YPDnc4 | EtOHnc1 | EtOHnc2 | Galnc1 | Galnc2 |
| 13 GCD7   | YLR291C   | YPDcl2 | YPDcl3 | EtOHcl1 | EtOHcl2 | Galcl1 | YPDnc1 | YPDnc2 | YPDnc3 | YPDnc4 | EtOHnc1 | EtOHnc2 | Galnc1 | Galnc2 |
| 13        | YKR051W   | YPDcl2 | YPDcl3 | EtOHcl1 | EtOHcl2 | Galcl1 | YPDnc1 | YPDnc2 | YPDnc3 | YPDnc4 | EtOHnc1 | EtOHnc2 | Galnc1 | Galnc2 |
| 13 VBA2   | YBR293W   | YPDcl2 | YPDcl3 | EtOHcl1 | EtOHcl2 | Galcl1 | YPDnc1 | YPDnc2 | YPDnc3 | YPDnc4 | EtOHnc1 | EtOHnc2 | Galnc1 | Galnc2 |
| 13 SAP155 | YFR040W   | YPDcl2 | YPDcl3 | EtOHcl1 | EtOHcl2 | Galcl1 | YPDnc1 | YPDnc2 | YPDnc3 | YPDnc4 | EtOHnc1 | EtOHnc2 | Galnc1 | Galnc2 |
| 13 MLF3   | YNL074C   | YPDcl2 | YPDcl3 | EtOHcl1 | EtOHcl2 | Galcl1 | YPDnc1 | YPDnc2 | YPDnc3 | YPDnc4 | EtOHnc1 | EtOHnc2 | Galnc1 | Galnc2 |
| 13 UNG1   | YML021C   | YPDcl2 | YPDcl3 | EtOHcl1 | EtOHcl2 | Galcl1 | YPDnc1 | YPDnc2 | YPDnc3 | YPDnc4 | EtOHnc1 | EtOHnc2 | Galnc1 | Galnc2 |

|    |        |           |        |        |         |         |        |        |        |        |        |         |         |        |        |
|----|--------|-----------|--------|--------|---------|---------|--------|--------|--------|--------|--------|---------|---------|--------|--------|
| 13 | FCY22  | YER060W-  | YPDcl2 | YPDcl3 | EtOHcl1 | EtOHcl2 | Galcl1 | YPDnc1 | YPDnc2 | YPDnc3 | YPDnc4 | EtOHnc1 | EtOHnc2 | Galnc1 | Galnc2 |
| 13 |        | YDR203W   | YPDcl2 | YPDcl3 | EtOHcl1 | EtOHcl2 | Galcl1 | YPDnc1 | YPDnc2 | YPDnc3 | YPDnc4 | EtOHnc1 | EtOHnc2 | Galnc1 | Galnc2 |
| 13 | SPR1   | YOR190W   | YPDcl2 | YPDcl3 | EtOHcl1 | EtOHcl2 | Galcl1 | YPDnc1 | YPDnc2 | YPDnc3 | YPDnc4 | EtOHnc1 | EtOHnc2 | Galnc1 | Galnc2 |
| 13 | SHE3   | YBR130C   | YPDcl2 | YPDcl3 | EtOHcl1 | EtOHcl2 | Galcl1 | YPDnc1 | YPDnc2 | YPDnc3 | YPDnc4 | EtOHnc1 | EtOHnc2 | Galnc1 | Galnc2 |
| 13 | RPL12B | YDR418W   | YPDcl2 | YPDcl3 | EtOHcl1 | EtOHcl2 | Galcl1 | YPDnc1 | YPDnc2 | YPDnc3 | YPDnc4 | EtOHnc1 | EtOHnc2 | Galnc1 | Galnc2 |
| 13 |        | YGR270C-A | YPDcl2 | YPDcl3 | EtOHcl1 | EtOHcl2 | Galcl1 | YPDnc1 | YPDnc2 | YPDnc3 | YPDnc4 | EtOHnc1 | EtOHnc2 | Galnc1 | Galnc2 |
| 13 |        | YIR024C   | YPDcl2 | YPDcl3 | EtOHcl1 | EtOHcl2 | Galcl1 | YPDnc1 | YPDnc2 | YPDnc3 | YPDnc4 | EtOHnc1 | EtOHnc2 | Galnc1 | Galnc2 |
| 13 | HPF1   | YOL155C   | YPDcl2 | YPDcl3 | EtOHcl1 | EtOHcl2 | Galcl1 | YPDnc1 | YPDnc2 | YPDnc3 | YPDnc4 | EtOHnc1 | EtOHnc2 | Galnc1 | Galnc2 |
| 13 | EST3   | YIL009C-A | YPDcl2 | YPDcl3 | EtOHcl1 | EtOHcl2 | Galcl1 | YPDnc1 | YPDnc2 | YPDnc3 | YPDnc4 | EtOHnc1 | EtOHnc2 | Galnc1 | Galnc2 |
| 13 | GEF1   | YJR040W   | YPDcl2 | YPDcl3 | EtOHcl1 | EtOHcl2 | Galcl1 | YPDnc1 | YPDnc2 | YPDnc3 | YPDnc4 | EtOHnc1 | EtOHnc2 | Galnc1 | Galnc2 |
| 13 | IRC18  | YJL037W   | YPDcl2 | YPDcl3 | EtOHcl1 | EtOHcl2 | Galcl1 | YPDnc1 | YPDnc2 | YPDnc3 | YPDnc4 | EtOHnc1 | EtOHnc2 | Galnc1 | Galnc2 |
| 13 |        | YOR059C   | YPDcl2 | YPDcl3 | EtOHcl1 | EtOHcl2 | Galcl1 | YPDnc1 | YPDnc2 | YPDnc3 | YPDnc4 | EtOHnc1 | EtOHnc2 | Galnc1 | Galnc2 |
| 13 |        | YGL149W   | YPDcl2 | YPDcl3 | EtOHcl1 | EtOHcl2 | Galcl1 | YPDnc1 | YPDnc2 | YPDnc3 | YPDnc4 | EtOHnc1 | EtOHnc2 | Galnc1 | Galnc2 |
| 13 | AIM20  | YIL158W   | YPDcl2 | YPDcl3 | EtOHcl1 | EtOHcl2 | Galcl1 | YPDnc1 | YPDnc2 | YPDnc3 | YPDnc4 | EtOHnc1 | EtOHnc2 | Galnc1 | Galnc2 |
| 13 | IST2   | YBR086C   | YPDcl2 | YPDcl3 | EtOHcl1 | EtOHcl2 | Galcl1 | YPDnc1 | YPDnc2 | YPDnc3 | YPDnc4 | EtOHnc1 | EtOHnc2 | Galnc1 | Galnc2 |
| 13 |        | YLR361C-A | YPDcl2 | YPDcl3 | EtOHcl1 | EtOHcl2 | Galcl1 | YPDnc1 | YPDnc2 | YPDnc3 | YPDnc4 | EtOHnc1 | EtOHnc2 | Galnc1 | Galnc2 |
| 13 | ISD11  | YER048W-  | YPDcl2 | YPDcl3 | EtOHcl1 | EtOHcl2 | Galcl1 | YPDnc1 | YPDnc2 | YPDnc3 | YPDnc4 | EtOHnc1 | EtOHnc2 | Galnc1 | Galnc2 |
| 13 |        | YML090W   | YPDcl2 | YPDcl3 | EtOHcl1 | EtOHcl2 | Galcl1 | YPDnc1 | YPDnc2 | YPDnc3 | YPDnc4 | EtOHnc1 | EtOHnc2 | Galnc1 | Galnc2 |
| 13 | DNA2   | YHR164C   | YPDcl2 | YPDcl3 | EtOHcl1 | EtOHcl2 | Galcl1 | YPDnc1 | YPDnc2 | YPDnc3 | YPDnc4 | EtOHnc1 | EtOHnc2 | Galnc1 | Galnc2 |
| 13 | EAP1   | YKL204W   | YPDcl2 | YPDcl3 | EtOHcl1 | EtOHcl2 | Galcl1 | YPDnc1 | YPDnc2 | YPDnc3 | YPDnc4 | EtOHnc1 | EtOHnc2 | Galnc1 | Galnc2 |
| 13 | MRPL28 | YDR462W   | YPDcl2 | YPDcl3 | EtOHcl1 | EtOHcl2 | Galcl1 | YPDnc1 | YPDnc2 | YPDnc3 | YPDnc4 | EtOHnc1 | EtOHnc2 | Galnc1 | Galnc2 |
| 13 | ZDS1   | YMR273C   | YPDcl2 | YPDcl3 | EtOHcl1 | EtOHcl2 | Galcl1 | YPDnc1 | YPDnc2 | YPDnc3 | YPDnc4 | EtOHnc1 | EtOHnc2 | Galnc1 | Galnc2 |
| 13 | JJJ2   | YJL162C   | YPDcl2 | YPDcl3 | EtOHcl1 | EtOHcl2 | Galcl1 | YPDnc1 | YPDnc2 | YPDnc3 | YPDnc4 | EtOHnc1 | EtOHnc2 | Galnc1 | Galnc2 |
| 13 |        | YMR175W-  | YPDcl2 | YPDcl3 | EtOHcl1 | EtOHcl2 | Galcl1 | YPDnc1 | YPDnc2 | YPDnc3 | YPDnc4 | EtOHnc1 | EtOHnc2 | Galnc1 | Galnc2 |
| 13 |        | YLL054C   | YPDcl2 | YPDcl3 | EtOHcl1 | EtOHcl2 | Galcl1 | YPDnc1 | YPDnc2 | YPDnc3 | YPDnc4 | EtOHnc1 | EtOHnc2 | Galnc1 | Galnc2 |
| 13 | PSA1   | YDL055C   | YPDcl2 | YPDcl3 | EtOHcl1 | EtOHcl2 | Galcl1 | YPDnc1 | YPDnc2 | YPDnc3 | YPDnc4 | EtOHnc1 | EtOHnc2 | Galnc1 | Galnc2 |
| 13 | TEF1   | YPR080W   | YPDcl2 | YPDcl3 | EtOHcl1 | EtOHcl2 | Galcl1 | YPDnc1 | YPDnc2 | YPDnc3 | YPDnc4 | EtOHnc1 | EtOHnc2 | Galnc1 | Galnc2 |
| 13 |        | YOL019W   | YPDcl2 | YPDcl3 | EtOHcl1 | EtOHcl2 | Galcl1 | YPDnc1 | YPDnc2 | YPDnc3 | YPDnc4 | EtOHnc1 | EtOHnc2 | Galnc1 | Galnc2 |
| 13 | SOH1   | YGL127C   | YPDcl2 | YPDcl3 | EtOHcl1 | EtOHcl2 | Galcl1 | YPDnc1 | YPDnc2 | YPDnc3 | YPDnc4 | EtOHnc1 | EtOHnc2 | Galnc1 | Galnc2 |
| 13 | PDR8   | YLR266C   | YPDcl2 | YPDcl3 | EtOHcl1 | EtOHcl2 | Galcl1 | YPDnc1 | YPDnc2 | YPDnc3 | YPDnc4 | EtOHnc1 | EtOHnc2 | Galnc1 | Galnc2 |
| 13 | RPL8A  | YHL033C   | YPDcl2 | YPDcl3 | EtOHcl1 | EtOHcl2 | Galcl1 | YPDnc1 | YPDnc2 | YPDnc3 | YPDnc4 | EtOHnc1 | EtOHnc2 | Galnc1 | Galnc2 |
| 13 | ECM4   | YKR076W   | YPDcl2 | YPDcl3 | EtOHcl1 | EtOHcl2 | Galcl1 | YPDnc1 | YPDnc2 | YPDnc3 | YPDnc4 | EtOHnc1 | EtOHnc2 | Galnc1 | Galnc2 |
| 13 | NGL2   | YMR285C   | YPDcl2 | YPDcl3 | EtOHcl1 | EtOHcl2 | Galcl1 | YPDnc1 | YPDnc2 | YPDnc3 | YPDnc4 | EtOHnc1 | EtOHnc2 | Galnc1 | Galnc2 |
| 13 | KEL3   | YPL263C   | YPDcl2 | YPDcl3 | EtOHcl1 | EtOHcl2 | Galcl1 | YPDnc1 | YPDnc2 | YPDnc3 | YPDnc4 | EtOHnc1 | EtOHnc2 | Galnc1 | Galnc2 |

|          |           |        |        |         |         |        |        |        |        |        |         |         |        |        |
|----------|-----------|--------|--------|---------|---------|--------|--------|--------|--------|--------|---------|---------|--------|--------|
| 13 SHC1  | YER096W   | YPDcl2 | YPDcl3 | EtOHcl1 | EtOHcl2 | Galcl1 | YPDnc1 | YPDnc2 | YPDnc3 | YPDnc4 | EtOHnc1 | EtOHnc2 | Galnc1 | Galnc2 |
| 13       | YOR325W   | YPDcl2 | YPDcl3 | EtOHcl1 | EtOHcl2 | Galcl1 | YPDnc1 | YPDnc2 | YPDnc3 | YPDnc4 | EtOHnc1 | EtOHnc2 | Galnc1 | Galnc2 |
| 13 MET18 | YIL128W   | YPDcl2 | YPDcl3 | EtOHcl1 | EtOHcl2 | Galcl1 | YPDnc1 | YPDnc2 | YPDnc3 | YPDnc4 | EtOHnc1 | EtOHnc2 | Galnc1 | Galnc2 |
| 13 AIM22 | YJL046W   | YPDcl2 | YPDcl3 | EtOHcl1 | EtOHcl2 | Galcl1 | YPDnc1 | YPDnc2 | YPDnc3 | YPDnc4 | EtOHnc1 | EtOHnc2 | Galnc1 | Galnc2 |
| 13       | YER053C-A | YPDcl2 | YPDcl3 | EtOHcl1 | EtOHcl2 | Galcl1 | YPDnc1 | YPDnc2 | YPDnc3 | YPDnc4 | EtOHnc1 | EtOHnc2 | Galnc1 | Galnc2 |
| 13 EGD1  | YPL037C   | YPDcl2 | YPDcl3 | EtOHcl1 | EtOHcl2 | Galcl1 | YPDnc1 | YPDnc2 | YPDnc3 | YPDnc4 | EtOHnc1 | EtOHnc2 | Galnc1 | Galnc2 |
| 13 PFA5  | YDR459C   | YPDcl2 | YPDcl3 | EtOHcl1 | EtOHcl2 | Galcl1 | YPDnc1 | YPDnc2 | YPDnc3 | YPDnc4 | EtOHnc1 | EtOHnc2 | Galnc1 | Galnc2 |
| 13 SNX3  | YOR357C   | YPDcl2 | YPDcl3 | EtOHcl1 | EtOHcl2 | Galcl1 | YPDnc1 | YPDnc2 | YPDnc3 | YPDnc4 | EtOHnc1 | EtOHnc2 | Galnc1 | Galnc2 |
| 13 CHS1  | YNL192W   | YPDcl2 | YPDcl3 | EtOHcl1 | EtOHcl2 | Galcl1 | YPDnc1 | YPDnc2 | YPDnc3 | YPDnc4 | EtOHnc1 | EtOHnc2 | Galnc1 | Galnc2 |
| 13 MNP1  | YGL068W   | YPDcl2 | YPDcl3 | EtOHcl1 | EtOHcl2 | Galcl1 | YPDnc1 | YPDnc2 | YPDnc3 | YPDnc4 | EtOHnc1 | EtOHnc2 | Galnc1 | Galnc2 |
| 13       | YDL157C   | YPDcl2 | YPDcl3 | EtOHcl1 | EtOHcl2 | Galcl1 | YPDnc1 | YPDnc2 | YPDnc3 | YPDnc4 | EtOHnc1 | EtOHnc2 | Galnc1 | Galnc2 |
| 13 SGT2  | YOR007C   | YPDcl2 | YPDcl3 | EtOHcl1 | EtOHcl2 | Galcl1 | YPDnc1 | YPDnc2 | YPDnc3 | YPDnc4 | EtOHnc1 | EtOHnc2 | Galnc1 | Galnc2 |
| 13 VID24 | YBR105C   | YPDcl2 | YPDcl3 | EtOHcl1 | EtOHcl2 | Galcl1 | YPDnc1 | YPDnc2 | YPDnc3 | YPDnc4 | EtOHnc1 | EtOHnc2 | Galnc1 | Galnc2 |
| 13 SLX5  | YDL013W   | YPDcl2 | YPDcl3 | EtOHcl1 | EtOHcl2 | Galcl1 | YPDnc1 | YPDnc2 | YPDnc3 | YPDnc4 | EtOHnc1 | EtOHnc2 | Galnc1 | Galnc2 |
| 13 RAD7  | YJR052W   | YPDcl2 | YPDcl3 | EtOHcl1 | EtOHcl2 | Galcl1 | YPDnc1 | YPDnc2 | YPDnc3 | YPDnc4 | EtOHnc1 | EtOHnc2 | Galnc1 | Galnc2 |
| 13 RRP12 | YPL012W   | YPDcl2 | YPDcl3 | EtOHcl1 | EtOHcl2 | Galcl1 | YPDnc1 | YPDnc2 | YPDnc3 | YPDnc4 | EtOHnc1 | EtOHnc2 | Galnc1 | Galnc2 |
| 13 EDE1  | YBL047C   | YPDcl2 | YPDcl3 | EtOHcl1 | EtOHcl2 | Galcl1 | YPDnc1 | YPDnc2 | YPDnc3 | YPDnc4 | EtOHnc1 | EtOHnc2 | Galnc1 | Galnc2 |
| 13 VPS1  | YKR001C   | YPDcl2 | YPDcl3 | EtOHcl1 | EtOHcl2 | Galcl1 | YPDnc1 | YPDnc2 | YPDnc3 | YPDnc4 | EtOHnc1 | EtOHnc2 | Galnc1 | Galnc2 |
| 13 PRM4  | YPL156C   | YPDcl2 | YPDcl3 | EtOHcl1 | EtOHcl2 | Galcl1 | YPDnc1 | YPDnc2 | YPDnc3 | YPDnc4 | EtOHnc1 | EtOHnc2 | Galnc1 | Galnc2 |
| 13 BBC1  | YJL020C   | YPDcl2 | YPDcl3 | EtOHcl1 | EtOHcl2 | Galcl1 | YPDnc1 | YPDnc2 | YPDnc3 | YPDnc4 | EtOHnc1 | EtOHnc2 | Galnc1 | Galnc2 |
| 13 SYH1  | YPL105C   | YPDcl2 | YPDcl3 | EtOHcl1 | EtOHcl2 | Galcl1 | YPDnc1 | YPDnc2 | YPDnc3 | YPDnc4 | EtOHnc1 | EtOHnc2 | Galnc1 | Galnc2 |
| 13       | YHR049C-A | YPDcl2 | YPDcl3 | EtOHcl1 | EtOHcl2 | Galcl1 | YPDnc1 | YPDnc2 | YPDnc3 | YPDnc4 | EtOHnc1 | EtOHnc2 | Galnc1 | Galnc2 |
| 13       | YHL006W-  | YPDcl2 | YPDcl3 | EtOHcl1 | EtOHcl2 | Galcl1 | YPDnc1 | YPDnc2 | YPDnc3 | YPDnc4 | EtOHnc1 | EtOHnc2 | Galnc1 | Galnc2 |
| 13 SRB6  | YBR253W   | YPDcl2 | YPDcl3 | EtOHcl1 | EtOHcl2 | Galcl1 | YPDnc1 | YPDnc2 | YPDnc3 | YPDnc4 | EtOHnc1 | EtOHnc2 | Galnc1 | Galnc2 |
| 13 TUB4  | YLR212C   | YPDcl2 | YPDcl3 | EtOHcl1 | EtOHcl2 | Galcl1 | YPDnc1 | YPDnc2 | YPDnc3 | YPDnc4 | EtOHnc1 | EtOHnc2 | Galnc1 | Galnc2 |
| 13 PET18 | YCR020C   | YPDcl2 | YPDcl3 | EtOHcl1 | EtOHcl2 | Galcl1 | YPDnc1 | YPDnc2 | YPDnc3 | YPDnc4 | EtOHnc1 | EtOHnc2 | Galnc1 | Galnc2 |
| 13       | YJR141W   | YPDcl2 | YPDcl3 | EtOHcl1 | EtOHcl2 | Galcl1 | YPDnc1 | YPDnc2 | YPDnc3 | YPDnc4 | EtOHnc1 | EtOHnc2 | Galnc1 | Galnc2 |
| 13 BCP1  | YDR361C   | YPDcl2 | YPDcl3 | EtOHcl1 | EtOHcl2 | Galcl1 | YPDnc1 | YPDnc2 | YPDnc3 | YPDnc4 | EtOHnc1 | EtOHnc2 | Galnc1 | Galnc2 |
| 13       | YPL009C   | YPDcl2 | YPDcl3 | EtOHcl1 | EtOHcl2 | Galcl1 | YPDnc1 | YPDnc2 | YPDnc3 | YPDnc4 | EtOHnc1 | EtOHnc2 | Galnc1 | Galnc2 |
| 13 CRZ1  | YNL027W   | YPDcl2 | YPDcl3 | EtOHcl1 | EtOHcl2 | Galcl1 | YPDnc1 | YPDnc2 | YPDnc3 | YPDnc4 | EtOHnc1 | EtOHnc2 | Galnc1 | Galnc2 |
| 13       | YNL211C   | YPDcl2 | YPDcl3 | EtOHcl1 | EtOHcl2 | Galcl1 | YPDnc1 | YPDnc2 | YPDnc3 | YPDnc4 | EtOHnc1 | EtOHnc2 | Galnc1 | Galnc2 |
| 13 CBP2  | YHL038C   | YPDcl2 | YPDcl3 | EtOHcl1 | EtOHcl2 | Galcl1 | YPDnc1 | YPDnc2 | YPDnc3 | YPDnc4 | EtOHnc1 | EtOHnc2 | Galnc1 | Galnc2 |
| 13 MDY2  | YOL111C   | YPDcl2 | YPDcl3 | EtOHcl1 | EtOHcl2 | Galcl1 | YPDnc1 | YPDnc2 | YPDnc3 | YPDnc4 | EtOHnc1 | EtOHnc2 | Galnc1 | Galnc2 |
| 13 PPH3  | YDR075W   | YPDcl2 | YPDcl3 | EtOHcl1 | EtOHcl2 | Galcl1 | YPDnc1 | YPDnc2 | YPDnc3 | YPDnc4 | EtOHnc1 | EtOHnc2 | Galnc1 | Galnc2 |

|           |           |        |        |         |         |        |        |        |        |        |         |         |        |        |
|-----------|-----------|--------|--------|---------|---------|--------|--------|--------|--------|--------|---------|---------|--------|--------|
| 13 NTF2   | YER009W   | YPDcl2 | YPDcl3 | EtOHcl1 | EtOHcl2 | Galcl1 | YPDnc1 | YPDnc2 | YPDnc3 | YPDnc4 | EtOHnc1 | EtOHnc2 | Galnc1 | Galnc2 |
| 13 MOB2   | YFL034C-B | YPDcl2 | YPDcl3 | EtOHcl1 | EtOHcl2 | Galcl1 | YPDnc1 | YPDnc2 | YPDnc3 | YPDnc4 | EtOHnc1 | EtOHnc2 | Galnc1 | Galnc2 |
| 13 STS1   | YIR011C   | YPDcl2 | YPDcl3 | EtOHcl1 | EtOHcl2 | Galcl1 | YPDnc1 | YPDnc2 | YPDnc3 | YPDnc4 | EtOHnc1 | EtOHnc2 | Galnc1 | Galnc2 |
| 13 PRC1   | YMR297W   | YPDcl2 | YPDcl3 | EtOHcl1 | EtOHcl2 | Galcl1 | YPDnc1 | YPDnc2 | YPDnc3 | YPDnc4 | EtOHnc1 | EtOHnc2 | Galnc1 | Galnc2 |
| 13 REC107 | YJR021C   | YPDcl2 | YPDcl3 | EtOHcl1 | EtOHcl2 | Galcl1 | YPDnc1 | YPDnc2 | YPDnc3 | YPDnc4 | EtOHnc1 | EtOHnc2 | Galnc1 | Galnc2 |
| 13 CHL4   | YDR254W   | YPDcl2 | YPDcl3 | EtOHcl1 | EtOHcl2 | Galcl1 | YPDnc1 | YPDnc2 | YPDnc3 | YPDnc4 | EtOHnc1 | EtOHnc2 | Galnc1 | Galnc2 |
| 13 RPL18B | YNL301C   | YPDcl2 | YPDcl3 | EtOHcl1 | EtOHcl2 | Galcl1 | YPDnc1 | YPDnc2 | YPDnc3 | YPDnc4 | EtOHnc1 | EtOHnc2 | Galnc1 | Galnc2 |
| 13        | YBR255C-A | YPDcl2 | YPDcl3 | EtOHcl1 | EtOHcl2 | Galcl1 | YPDnc1 | YPDnc2 | YPDnc3 | YPDnc4 | EtOHnc1 | EtOHnc2 | Galnc1 | Galnc2 |
| 13 WHI4   | YDL224C   | YPDcl2 | YPDcl3 | EtOHcl1 | EtOHcl2 | Galcl1 | YPDnc1 | YPDnc2 | YPDnc3 | YPDnc4 | EtOHnc1 | EtOHnc2 | Galnc1 | Galnc2 |
| 13 ARC1   | YGL105W   | YPDcl2 | YPDcl3 | EtOHcl1 | EtOHcl2 | Galcl1 | YPDnc1 | YPDnc2 | YPDnc3 | YPDnc4 | EtOHnc1 | EtOHnc2 | Galnc1 | Galnc2 |
| 13 UTP22  | YGR090W   | YPDcl2 | YPDcl3 | EtOHcl1 | EtOHcl2 | Galcl1 | YPDnc1 | YPDnc2 | YPDnc3 | YPDnc4 | EtOHnc1 | EtOHnc2 | Galnc1 | Galnc2 |
| 13 ATP11  | YNL315C   | YPDcl2 | YPDcl3 | EtOHcl1 | EtOHcl2 | Galcl1 | YPDnc1 | YPDnc2 | YPDnc3 | YPDnc4 | EtOHnc1 | EtOHnc2 | Galnc1 | Galnc2 |
| 13 LDB18  | YLL049W   | YPDcl2 | YPDcl3 | EtOHcl1 | EtOHcl2 | Galcl1 | YPDnc1 | YPDnc2 | YPDnc3 | YPDnc4 | EtOHnc1 | EtOHnc2 | Galnc1 | Galnc2 |
| 13 URA1   | YKL216W   | YPDcl2 | YPDcl3 | EtOHcl1 | EtOHcl2 | Galcl1 | YPDnc1 | YPDnc2 | YPDnc3 | YPDnc4 | EtOHnc1 | EtOHnc2 | Galnc1 | Galnc2 |
| 13 NBP2   | YDR162C   | YPDcl2 | YPDcl3 | EtOHcl1 | EtOHcl2 | Galcl1 | YPDnc1 | YPDnc2 | YPDnc3 | YPDnc4 | EtOHnc1 | EtOHnc2 | Galnc1 | Galnc2 |
| 13 YIH1   | YCR059C   | YPDcl2 | YPDcl3 | EtOHcl1 | EtOHcl2 | Galcl1 | YPDnc1 | YPDnc2 | YPDnc3 | YPDnc4 | EtOHnc1 | EtOHnc2 | Galnc1 | Galnc2 |
| 13 PET10  | YKR046C   | YPDcl2 | YPDcl3 | EtOHcl1 | EtOHcl2 | Galcl1 | YPDnc1 | YPDnc2 | YPDnc3 | YPDnc4 | EtOHnc1 | EtOHnc2 | Galnc1 | Galnc2 |
| 13 GID7   | YCL039W   | YPDcl2 | YPDcl3 | EtOHcl1 | EtOHcl2 | Galcl1 | YPDnc1 | YPDnc2 | YPDnc3 | YPDnc4 | EtOHnc1 | EtOHnc2 | Galnc1 | Galnc2 |
| 13 BTS1   | YPL069C   | YPDcl2 | YPDcl3 | EtOHcl1 | EtOHcl2 | Galcl1 | YPDnc1 | YPDnc2 | YPDnc3 | YPDnc4 | EtOHnc1 | EtOHnc2 | Galnc1 | Galnc2 |
| 13 PRP46  | YPL151C   | YPDcl2 | YPDcl3 | EtOHcl1 | EtOHcl2 | Galcl1 | YPDnc1 | YPDnc2 | YPDnc3 | YPDnc4 | EtOHnc1 | EtOHnc2 | Galnc1 | Galnc2 |
| 13 BOP3   | YNL042W   | YPDcl2 | YPDcl3 | EtOHcl1 | EtOHcl2 | Galcl1 | YPDnc1 | YPDnc2 | YPDnc3 | YPDnc4 | EtOHnc1 | EtOHnc2 | Galnc1 | Galnc2 |
| 13 SET5   | YHR207C   | YPDcl2 | YPDcl3 | EtOHcl1 | EtOHcl2 | Galcl1 | YPDnc1 | YPDnc2 | YPDnc3 | YPDnc4 | EtOHnc1 | EtOHnc2 | Galnc1 | Galnc2 |
| 13 HSP42  | YDR171W   | YPDcl2 | YPDcl3 | EtOHcl1 | EtOHcl2 | Galcl1 | YPDnc1 | YPDnc2 | YPDnc3 | YPDnc4 | EtOHnc1 | EtOHnc2 | Galnc1 | Galnc2 |
| 13 PEX29  | YDR479C   | YPDcl2 | YPDcl3 | EtOHcl1 | EtOHcl2 | Galcl1 | YPDnc1 | YPDnc2 | YPDnc3 | YPDnc4 | EtOHnc1 | EtOHnc2 | Galnc1 | Galnc2 |
| 13 MTW1   | YAL034W-A | YPDcl2 | YPDcl3 | EtOHcl1 | EtOHcl2 | Galcl1 | YPDnc1 | YPDnc2 | YPDnc3 | YPDnc4 | EtOHnc1 | EtOHnc2 | Galnc1 | Galnc2 |
| 13 HNT3   | YOR258W   | YPDcl2 | YPDcl3 | EtOHcl1 | EtOHcl2 | Galcl1 | YPDnc1 | YPDnc2 | YPDnc3 | YPDnc4 | EtOHnc1 | EtOHnc2 | Galnc1 | Galnc2 |
| 13 BIO4   | YNR057C   | YPDcl2 | YPDcl3 | EtOHcl1 | EtOHcl2 | Galcl1 | YPDnc1 | YPDnc2 | YPDnc3 | YPDnc4 | EtOHnc1 | EtOHnc2 | Galnc1 | Galnc2 |
| 13        | YGR161W-B | YPDcl2 | YPDcl3 | EtOHcl1 | EtOHcl2 | Galcl1 | YPDnc1 | YPDnc2 | YPDnc3 | YPDnc4 | EtOHnc1 | EtOHnc2 | Galnc1 | Galnc2 |
| 13 LPD1   | YFL018C   | YPDcl2 | YPDcl3 | EtOHcl1 | EtOHcl2 | Galcl1 | YPDnc1 | YPDnc2 | YPDnc3 | YPDnc4 | EtOHnc1 | EtOHnc2 | Galnc1 | Galnc2 |
| 13 MDJ2   | YNL328C   | YPDcl2 | YPDcl3 | EtOHcl1 | EtOHcl2 | Galcl1 | YPDnc1 | YPDnc2 | YPDnc3 | YPDnc4 | EtOHnc1 | EtOHnc2 | Galnc1 | Galnc2 |
| 13        | YCL049C   | YPDcl2 | YPDcl3 | EtOHcl1 | EtOHcl2 | Galcl1 | YPDnc1 | YPDnc2 | YPDnc3 | YPDnc4 | EtOHnc1 | EtOHnc2 | Galnc1 | Galnc2 |
| 13        | YLR072W   | YPDcl2 | YPDcl3 | EtOHcl1 | EtOHcl2 | Galcl1 | YPDnc1 | YPDnc2 | YPDnc3 | YPDnc4 | EtOHnc1 | EtOHnc2 | Galnc1 | Galnc2 |
| 13 UBA4   | YHR111W   | YPDcl2 | YPDcl3 | EtOHcl1 | EtOHcl2 | Galcl1 | YPDnc1 | YPDnc2 | YPDnc3 | YPDnc4 | EtOHnc1 | EtOHnc2 | Galnc1 | Galnc2 |
| 13 APM3   | YBR288C   | YPDcl2 | YPDcl3 | EtOHcl1 | EtOHcl2 | Galcl1 | YPDnc1 | YPDnc2 | YPDnc3 | YPDnc4 | EtOHnc1 | EtOHnc2 | Galnc1 | Galnc2 |

|    |       |           |        |        |         |         |        |        |        |        |        |         |         |        |        |
|----|-------|-----------|--------|--------|---------|---------|--------|--------|--------|--------|--------|---------|---------|--------|--------|
| 13 | THI20 | YOL055C   | YPDcl2 | YPDcl3 | EtOHcl1 | EtOHcl2 | Galcl1 | YPDnc1 | YPDnc2 | YPDnc3 | YPDnc4 | EtOHnc1 | EtOHnc2 | Galnc1 | Galnc2 |
| 13 | ALG2  | YGL065C   | YPDcl2 | YPDcl3 | EtOHcl1 | EtOHcl2 | Galcl1 | YPDnc1 | YPDnc2 | YPDnc3 | YPDnc4 | EtOHnc1 | EtOHnc2 | Galnc1 | Galnc2 |
| 13 | ARD1  | YHR013C   | YPDcl2 | YPDcl3 | EtOHcl1 | EtOHcl2 | Galcl1 | YPDnc1 | YPDnc2 | YPDnc3 | YPDnc4 | EtOHnc1 | EtOHnc2 | Galnc1 | Galnc2 |
| 13 | SLY41 | YOR307C   | YPDcl2 | YPDcl3 | EtOHcl1 | EtOHcl2 | Galcl1 | YPDnc1 | YPDnc2 | YPDnc3 | YPDnc4 | EtOHnc1 | EtOHnc2 | Galnc1 | Galnc2 |
| 13 |       | YAL042C-A | YPDcl2 | YPDcl3 | EtOHcl1 | EtOHcl2 | Galcl1 | YPDnc1 | YPDnc2 | YPDnc3 | YPDnc4 | EtOHnc1 | EtOHnc2 | Galnc1 | Galnc2 |
| 13 | GTT1  | YIR038C   | YPDcl2 | YPDcl3 | EtOHcl1 | EtOHcl2 | Galcl1 | YPDnc1 | YPDnc2 | YPDnc3 | YPDnc4 | EtOHnc1 | EtOHnc2 | Galnc1 | Galnc2 |
| 13 |       | YLR230W   | YPDcl2 | YPDcl3 | EtOHcl1 | EtOHcl2 | Galcl1 | YPDnc1 | YPDnc2 | YPDnc3 | YPDnc4 | EtOHnc1 | EtOHnc2 | Galnc1 | Galnc2 |
| 13 | AIM1  | YAL046C   | YPDcl2 | YPDcl3 | EtOHcl1 | EtOHcl2 | Galcl1 | YPDnc1 | YPDnc2 | YPDnc3 | YPDnc4 | EtOHnc1 | EtOHnc2 | Galnc1 | Galnc2 |
| 13 | RSA1  | YPL193W   | YPDcl2 | YPDcl3 | EtOHcl1 | EtOHcl2 | Galcl1 | YPDnc1 | YPDnc2 | YPDnc3 | YPDnc4 | EtOHnc1 | EtOHnc2 | Galnc1 | Galnc2 |
| 13 |       | YJL045W   | YPDcl2 | YPDcl3 | EtOHcl1 | EtOHcl2 | Galcl1 | YPDnc1 | YPDnc2 | YPDnc3 | YPDnc4 | EtOHnc1 | EtOHnc2 | Galnc1 | Galnc2 |
| 13 |       | YKR078W   | YPDcl2 | YPDcl3 | EtOHcl1 | EtOHcl2 | Galcl1 | YPDnc1 | YPDnc2 | YPDnc3 | YPDnc4 | EtOHnc1 | EtOHnc2 | Galnc1 | Galnc2 |
| 13 | VPS69 | YPR087W   | YPDcl2 | YPDcl3 | EtOHcl1 | EtOHcl2 | Galcl1 | YPDnc1 | YPDnc2 | YPDnc3 | YPDnc4 | EtOHnc1 | EtOHnc2 | Galnc1 | Galnc2 |
| 13 | RIM20 | YOR275C   | YPDcl2 | YPDcl3 | EtOHcl1 | EtOHcl2 | Galcl1 | YPDnc1 | YPDnc2 | YPDnc3 | YPDnc4 | EtOHnc1 | EtOHnc2 | Galnc1 | Galnc2 |
| 13 | BET5  | YML077W   | YPDcl2 | YPDcl3 | EtOHcl1 | EtOHcl2 | Galcl1 | YPDnc1 | YPDnc2 | YPDnc3 | YPDnc4 | EtOHnc1 | EtOHnc2 | Galnc1 | Galnc2 |
| 13 | MED6  | YHR058C   | YPDcl2 | YPDcl3 | EtOHcl1 | EtOHcl2 | Galcl1 | YPDnc1 | YPDnc2 | YPDnc3 | YPDnc4 | EtOHnc1 | EtOHnc2 | Galnc1 | Galnc2 |
| 13 | SEC23 | YPR181C   | YPDcl2 | YPDcl3 | EtOHcl1 | EtOHcl2 | Galcl1 | YPDnc1 | YPDnc2 | YPDnc3 | YPDnc4 | EtOHnc1 | EtOHnc2 | Galnc1 | Galnc2 |
| 13 |       | YDL025W-  | YPDcl2 | YPDcl3 | EtOHcl1 | EtOHcl2 | Galcl1 | YPDnc1 | YPDnc2 | YPDnc3 | YPDnc4 | EtOHnc1 | EtOHnc2 | Galnc1 | Galnc2 |
| 13 | PHO88 | YBR106W   | YPDcl2 | YPDcl3 | EtOHcl1 | EtOHcl2 | Galcl1 | YPDnc1 | YPDnc2 | YPDnc3 | YPDnc4 | EtOHnc1 | EtOHnc2 | Galnc1 | Galnc2 |
| 13 | ARG4  | YHR018C   | YPDcl2 | YPDcl3 | EtOHcl1 | EtOHcl2 | Galcl1 | YPDnc1 | YPDnc2 | YPDnc3 | YPDnc4 | EtOHnc1 | EtOHnc2 | Galnc1 | Galnc2 |
| 13 |       | YPL197C   | YPDcl2 | YPDcl3 | EtOHcl1 | EtOHcl2 | Galcl1 | YPDnc1 | YPDnc2 | YPDnc3 | YPDnc4 | EtOHnc1 | EtOHnc2 | Galnc1 | Galnc2 |
| 13 | NPL4  | YBR170C   | YPDcl2 | YPDcl3 | EtOHcl1 | EtOHcl2 | Galcl1 | YPDnc1 | YPDnc2 | YPDnc3 | YPDnc4 | EtOHnc1 | EtOHnc2 | Galnc1 | Galnc2 |
| 13 |       | YDL211C   | YPDcl2 | YPDcl3 | EtOHcl1 | EtOHcl2 | Galcl1 | YPDnc1 | YPDnc2 | YPDnc3 | YPDnc4 | EtOHnc1 | EtOHnc2 | Galnc1 | Galnc2 |
| 13 | ATP4  | YPL078C   | YPDcl2 | YPDcl3 | EtOHcl1 | EtOHcl2 | Galcl1 | YPDnc1 | YPDnc2 | YPDnc3 | YPDnc4 | EtOHnc1 | EtOHnc2 | Galnc1 | Galnc2 |
| 13 |       | YLR064W   | YPDcl2 | YPDcl3 | EtOHcl1 | EtOHcl2 | Galcl1 | YPDnc1 | YPDnc2 | YPDnc3 | YPDnc4 | EtOHnc1 | EtOHnc2 | Galnc1 | Galnc2 |
| 13 | TDH3  | YGR192C   | YPDcl2 | YPDcl3 | EtOHcl1 | EtOHcl2 | Galcl1 | YPDnc1 | YPDnc2 | YPDnc3 | YPDnc4 | EtOHnc1 | EtOHnc2 | Galnc1 | Galnc2 |
| 13 | RIM8  | YGL045W   | YPDcl2 | YPDcl3 | EtOHcl1 | EtOHcl2 | Galcl1 | YPDnc1 | YPDnc2 | YPDnc3 | YPDnc4 | EtOHnc1 | EtOHnc2 | Galnc1 | Galnc2 |
| 13 | MDH3  | YDL078C   | YPDcl2 | YPDcl3 | EtOHcl1 | EtOHcl2 | Galcl1 | YPDnc1 | YPDnc2 | YPDnc3 | YPDnc4 | EtOHnc1 | EtOHnc2 | Galnc1 | Galnc2 |
| 13 | TMA29 | YMR226C   | YPDcl2 | YPDcl3 | EtOHcl1 | EtOHcl2 | Galcl1 | YPDnc1 | YPDnc2 | YPDnc3 | YPDnc4 | EtOHnc1 | EtOHnc2 | Galnc1 | Galnc2 |
| 13 | RPN10 | YHR200W   | YPDcl2 | YPDcl3 | EtOHcl1 | EtOHcl2 | Galcl1 | YPDnc1 | YPDnc2 | YPDnc3 | YPDnc4 | EtOHnc1 | EtOHnc2 | Galnc1 | Galnc2 |
| 13 |       | YBR219C   | YPDcl2 | YPDcl3 | EtOHcl1 | EtOHcl2 | Galcl1 | YPDnc1 | YPDnc2 | YPDnc3 | YPDnc4 | EtOHnc1 | EtOHnc2 | Galnc1 | Galnc2 |
| 13 |       | YLR379W   | YPDcl2 | YPDcl3 | EtOHcl1 | EtOHcl2 | Galcl1 | YPDnc1 | YPDnc2 | YPDnc3 | YPDnc4 | EtOHnc1 | EtOHnc2 | Galnc1 | Galnc2 |
| 13 | COQ4  | YDR204W   | YPDcl2 | YPDcl3 | EtOHcl1 | EtOHcl2 | Galcl1 | YPDnc1 | YPDnc2 | YPDnc3 | YPDnc4 | EtOHnc1 | EtOHnc2 | Galnc1 | Galnc2 |
| 13 | BEM4  | YPL161C   | YPDcl2 | YPDcl3 | EtOHcl1 | EtOHcl2 | Galcl1 | YPDnc1 | YPDnc2 | YPDnc3 | YPDnc4 | EtOHnc1 | EtOHnc2 | Galnc1 | Galnc2 |
| 13 | NDE1  | YMR145C   | YPDcl2 | YPDcl3 | EtOHcl1 | EtOHcl2 | Galcl1 | YPDnc1 | YPDnc2 | YPDnc3 | YPDnc4 | EtOHnc1 | EtOHnc2 | Galnc1 | Galnc2 |



|    |           |         |        |         |         |         |        |        |        |        |         |         |         |        |        |
|----|-----------|---------|--------|---------|---------|---------|--------|--------|--------|--------|---------|---------|---------|--------|--------|
| 13 | YIR017W-A | YPDcl2  | YPDcl3 | EtOHcl1 | EtOHcl2 | Galcl1  | YPDnc1 | YPDnc2 | YPDnc3 | YPDnc4 | EtOHnc1 | EtOHnc2 | Galnc1  | Galnc2 |        |
| 13 | PRO1      | YDR300C | YPDcl2 | YPDcl3  | EtOHcl1 | EtOHcl2 | Galcl1 | YPDnc1 | YPDnc2 | YPDnc3 | YPDnc4  | EtOHnc1 | EtOHnc2 | Galnc1 | Galnc2 |
| 13 | CDC42     | YLR229C | YPDcl2 | YPDcl3  | EtOHcl1 | EtOHcl2 | Galcl1 | YPDnc1 | YPDnc2 | YPDnc3 | YPDnc4  | EtOHnc1 | EtOHnc2 | Galnc1 | Galnc2 |
| 13 | RPN13     | YLR421C | YPDcl2 | YPDcl3  | EtOHcl1 | EtOHcl2 | Galcl1 | YPDnc1 | YPDnc2 | YPDnc3 | YPDnc4  | EtOHnc1 | EtOHnc2 | Galnc1 | Galnc2 |
| 13 | DAN4      | YJR151C | YPDcl2 | YPDcl3  | EtOHcl1 | EtOHcl2 | Galcl1 | YPDnc1 | YPDnc2 | YPDnc3 | YPDnc4  | EtOHnc1 | EtOHnc2 | Galnc1 | Galnc2 |
| 13 | PNG1      | YPL096W | YPDcl2 | YPDcl3  | EtOHcl1 | EtOHcl2 | Galcl1 | YPDnc1 | YPDnc2 | YPDnc3 | YPDnc4  | EtOHnc1 | EtOHnc2 | Galnc1 | Galnc2 |
| 13 | YMD8      | YML038C | YPDcl2 | YPDcl3  | EtOHcl1 | EtOHcl2 | Galcl1 | YPDnc1 | YPDnc2 | YPDnc3 | YPDnc4  | EtOHnc1 | EtOHnc2 | Galnc1 | Galnc2 |
| 13 | YIA6      | YIL006W | YPDcl2 | YPDcl3  | EtOHcl1 | EtOHcl2 | Galcl1 | YPDnc1 | YPDnc2 | YPDnc3 | YPDnc4  | EtOHnc1 | EtOHnc2 | Galnc1 | Galnc2 |
| 13 | OMS1      | YDR316W | YPDcl2 | YPDcl3  | EtOHcl1 | EtOHcl2 | Galcl1 | YPDnc1 | YPDnc2 | YPDnc3 | YPDnc4  | EtOHnc1 | EtOHnc2 | Galnc1 | Galnc2 |
| 13 | PDR18     | YNR070W | YPDcl2 | YPDcl3  | EtOHcl1 | EtOHcl2 | Galcl1 | YPDnc1 | YPDnc2 | YPDnc3 | YPDnc4  | EtOHnc1 | EtOHnc2 | Galnc1 | Galnc2 |
| 13 | VPS51     | YKR020W | YPDcl2 | YPDcl3  | EtOHcl1 | EtOHcl2 | Galcl1 | YPDnc1 | YPDnc2 | YPDnc3 | YPDnc4  | EtOHnc1 | EtOHnc2 | Galnc1 | Galnc2 |
| 13 | YOL164W-  | YPDcl2  | YPDcl3 | EtOHcl1 | EtOHcl2 | Galcl1  | YPDnc1 | YPDnc2 | YPDnc3 | YPDnc4 | EtOHnc1 | EtOHnc2 | Galnc1  | Galnc2 |        |
| 13 | DYS1      | YHR068W | YPDcl2 | YPDcl3  | EtOHcl1 | EtOHcl2 | Galcl1 | YPDnc1 | YPDnc2 | YPDnc3 | YPDnc4  | EtOHnc1 | EtOHnc2 | Galnc1 | Galnc2 |
| 13 | YEL010W   | YPDcl2  | YPDcl3 | EtOHcl1 | EtOHcl2 | Galcl1  | YPDnc1 | YPDnc2 | YPDnc3 | YPDnc4 | EtOHnc1 | EtOHnc2 | Galnc1  | Galnc2 |        |
| 13 | AIM14     | YGL160W | YPDcl2 | YPDcl3  | EtOHcl1 | EtOHcl2 | Galcl1 | YPDnc1 | YPDnc2 | YPDnc3 | YPDnc4  | EtOHnc1 | EtOHnc2 | Galnc1 | Galnc2 |
| 13 | YGR042W   | YPDcl2  | YPDcl3 | EtOHcl1 | EtOHcl2 | Galcl1  | YPDnc1 | YPDnc2 | YPDnc3 | YPDnc4 | EtOHnc1 | EtOHnc2 | Galnc1  | Galnc2 |        |
| 13 | YCR041W   | YPDcl2  | YPDcl3 | EtOHcl1 | EtOHcl2 | Galcl1  | YPDnc1 | YPDnc2 | YPDnc3 | YPDnc4 | EtOHnc1 | EtOHnc2 | Galnc1  | Galnc2 |        |
| 13 | NPR2      | YEL062W | YPDcl2 | YPDcl3  | EtOHcl1 | EtOHcl2 | Galcl1 | YPDnc1 | YPDnc2 | YPDnc3 | YPDnc4  | EtOHnc1 | EtOHnc2 | Galnc1 | Galnc2 |
| 13 | YLR143W   | YPDcl2  | YPDcl3 | EtOHcl1 | EtOHcl2 | Galcl1  | YPDnc1 | YPDnc2 | YPDnc3 | YPDnc4 | EtOHnc1 | EtOHnc2 | Galnc1  | Galnc2 |        |
| 13 | STO1      | YMR125W | YPDcl2 | YPDcl3  | EtOHcl1 | EtOHcl2 | Galcl1 | YPDnc1 | YPDnc2 | YPDnc3 | YPDnc4  | EtOHnc1 | EtOHnc2 | Galnc1 | Galnc2 |
| 13 | YLR126C   | YPDcl2  | YPDcl3 | EtOHcl1 | EtOHcl2 | Galcl1  | YPDnc1 | YPDnc2 | YPDnc3 | YPDnc4 | EtOHnc1 | EtOHnc2 | Galnc1  | Galnc2 |        |
| 13 | NRK1      | YNL129W | YPDcl2 | YPDcl3  | EtOHcl1 | EtOHcl2 | Galcl1 | YPDnc1 | YPDnc2 | YPDnc3 | YPDnc4  | EtOHnc1 | EtOHnc2 | Galnc1 | Galnc2 |
| 13 | RPT6      | YGL048C | YPDcl2 | YPDcl3  | EtOHcl1 | EtOHcl2 | Galcl1 | YPDnc1 | YPDnc2 | YPDnc3 | YPDnc4  | EtOHnc1 | EtOHnc2 | Galnc1 | Galnc2 |
| 13 | TEC1      | YBR083W | YPDcl2 | YPDcl3  | EtOHcl1 | EtOHcl2 | Galcl1 | YPDnc1 | YPDnc2 | YPDnc3 | YPDnc4  | EtOHnc1 | EtOHnc2 | Galnc1 | Galnc2 |
| 13 | YJR012C   | YPDcl2  | YPDcl3 | EtOHcl1 | EtOHcl2 | Galcl1  | YPDnc1 | YPDnc2 | YPDnc3 | YPDnc4 | EtOHnc1 | EtOHnc2 | Galnc1  | Galnc2 |        |
| 13 | PUS6      | YGR169C | YPDcl2 | YPDcl3  | EtOHcl1 | EtOHcl2 | Galcl1 | YPDnc1 | YPDnc2 | YPDnc3 | YPDnc4  | EtOHnc1 | EtOHnc2 | Galnc1 | Galnc2 |
| 13 | YJL127W-A | YPDcl2  | YPDcl3 | EtOHcl1 | EtOHcl2 | Galcl1  | YPDnc1 | YPDnc2 | YPDnc3 | YPDnc4 | EtOHnc1 | EtOHnc2 | Galnc1  | Galnc2 |        |
| 13 | YHR138C   | YPDcl2  | YPDcl3 | EtOHcl1 | EtOHcl2 | Galcl1  | YPDnc1 | YPDnc2 | YPDnc3 | YPDnc4 | EtOHnc1 | EtOHnc2 | Galnc1  | Galnc2 |        |
| 13 | RPS18B    | YML026C | YPDcl2 | YPDcl3  | EtOHcl1 | EtOHcl2 | Galcl1 | YPDnc1 | YPDnc2 | YPDnc3 | YPDnc4  | EtOHnc1 | EtOHnc2 | Galnc1 | Galnc2 |
| 13 | MAK10     | YEL053C | YPDcl2 | YPDcl3  | EtOHcl1 | EtOHcl2 | Galcl1 | YPDnc1 | YPDnc2 | YPDnc3 | YPDnc4  | EtOHnc1 | EtOHnc2 | Galnc1 | Galnc2 |
| 13 | VOA1      | YGR106C | YPDcl2 | YPDcl3  | EtOHcl1 | EtOHcl2 | Galcl1 | YPDnc1 | YPDnc2 | YPDnc3 | YPDnc4  | EtOHnc1 | EtOHnc2 | Galnc1 | Galnc2 |
| 13 | YLR444C   | YPDcl2  | YPDcl3 | EtOHcl1 | EtOHcl2 | Galcl1  | YPDnc1 | YPDnc2 | YPDnc3 | YPDnc4 | EtOHnc1 | EtOHnc2 | Galnc1  | Galnc2 |        |
| 13 | YJR128W   | YPDcl2  | YPDcl3 | EtOHcl1 | EtOHcl2 | Galcl1  | YPDnc1 | YPDnc2 | YPDnc3 | YPDnc4 | EtOHnc1 | EtOHnc2 | Galnc1  | Galnc2 |        |
| 13 | YOL099C   | YPDcl2  | YPDcl3 | EtOHcl1 | EtOHcl2 | Galcl1  | YPDnc1 | YPDnc2 | YPDnc3 | YPDnc4 | EtOHnc1 | EtOHnc2 | Galnc1  | Galnc2 |        |

|           |           |        |        |         |         |        |        |        |        |        |         |         |        |        |
|-----------|-----------|--------|--------|---------|---------|--------|--------|--------|--------|--------|---------|---------|--------|--------|
| 13 YKE4   | YIL023C   | YPDcl2 | YPDcl3 | EtOHcl1 | EtOHcl2 | Galcl1 | YPDnc1 | YPDnc2 | YPDnc3 | YPDnc4 | EtOHnc1 | EtOHnc2 | Galnc1 | Galnc2 |
| 13 SNF4   | YGL115W   | YPDcl2 | YPDcl3 | EtOHcl1 | EtOHcl2 | Galcl1 | YPDnc1 | YPDnc2 | YPDnc3 | YPDnc4 | EtOHnc1 | EtOHnc2 | Galnc1 | Galnc2 |
| 13 ZEO1   | YOL109W   | YPDcl2 | YPDcl3 | EtOHcl1 | EtOHcl2 | Galcl1 | YPDnc1 | YPDnc2 | YPDnc3 | YPDnc4 | EtOHnc1 | EtOHnc2 | Galnc1 | Galnc2 |
| 13 WSC4   | YHL028W   | YPDcl2 | YPDcl3 | EtOHcl1 | EtOHcl2 | Galcl1 | YPDnc1 | YPDnc2 | YPDnc3 | YPDnc4 | EtOHnc1 | EtOHnc2 | Galnc1 | Galnc2 |
| 13 TGL3   | YMR313C   | YPDcl2 | YPDcl3 | EtOHcl1 | EtOHcl2 | Galcl1 | YPDnc1 | YPDnc2 | YPDnc3 | YPDnc4 | EtOHnc1 | EtOHnc2 | Galnc1 | Galnc2 |
| 13 DCR2   | YLR361C   | YPDcl2 | YPDcl3 | EtOHcl1 | EtOHcl2 | Galcl1 | YPDnc1 | YPDnc2 | YPDnc3 | YPDnc4 | EtOHnc1 | EtOHnc2 | Galnc1 | Galnc2 |
| 13 OST5   | YGL226C-A | YPDcl2 | YPDcl3 | EtOHcl1 | EtOHcl2 | Galcl1 | YPDnc1 | YPDnc2 | YPDnc3 | YPDnc4 | EtOHnc1 | EtOHnc2 | Galnc1 | Galnc2 |
| 13        | YDL177C   | YPDcl2 | YPDcl3 | EtOHcl1 | EtOHcl2 | Galcl1 | YPDnc1 | YPDnc2 | YPDnc3 | YPDnc4 | EtOHnc1 | EtOHnc2 | Galnc1 | Galnc2 |
| 13 MEF1   | YLR069C   | YPDcl2 | YPDcl3 | EtOHcl1 | EtOHcl2 | Galcl1 | YPDnc1 | YPDnc2 | YPDnc3 | YPDnc4 | EtOHnc1 | EtOHnc2 | Galnc1 | Galnc2 |
| 13 MAK21  | YDR060W   | YPDcl2 | YPDcl3 | EtOHcl1 | EtOHcl2 | Galcl1 | YPDnc1 | YPDnc2 | YPDnc3 | YPDnc4 | EtOHnc1 | EtOHnc2 | Galnc1 | Galnc2 |
| 13 LEA1   | YPL213W   | YPDcl2 | YPDcl3 | EtOHcl1 | EtOHcl2 | Galcl1 | YPDnc1 | YPDnc2 | YPDnc3 | YPDnc4 | EtOHnc1 | EtOHnc2 | Galnc1 | Galnc2 |
| 13 SDH2   | YLL041C   | YPDcl2 | YPDcl3 | EtOHcl1 | EtOHcl2 | Galcl1 | YPDnc1 | YPDnc2 | YPDnc3 | YPDnc4 | EtOHnc1 | EtOHnc2 | Galnc1 | Galnc2 |
| 13 LSM2   | YBL026W   | YPDcl2 | YPDcl3 | EtOHcl1 | EtOHcl2 | Galcl1 | YPDnc1 | YPDnc2 | YPDnc3 | YPDnc4 | EtOHnc1 | EtOHnc2 | Galnc1 | Galnc2 |
| 13        | YBR076C-A | YPDcl2 | YPDcl3 | EtOHcl1 | EtOHcl2 | Galcl1 | YPDnc1 | YPDnc2 | YPDnc3 | YPDnc4 | EtOHnc1 | EtOHnc2 | Galnc1 | Galnc2 |
| 13        | YNR021W   | YPDcl2 | YPDcl3 | EtOHcl1 | EtOHcl2 | Galcl1 | YPDnc1 | YPDnc2 | YPDnc3 | YPDnc4 | EtOHnc1 | EtOHnc2 | Galnc1 | Galnc2 |
| 13 TWF1   | YGR080W   | YPDcl2 | YPDcl3 | EtOHcl1 | EtOHcl2 | Galcl1 | YPDnc1 | YPDnc2 | YPDnc3 | YPDnc4 | EtOHnc1 | EtOHnc2 | Galnc1 | Galnc2 |
| 13        | YBL055C   | YPDcl2 | YPDcl3 | EtOHcl1 | EtOHcl2 | Galcl1 | YPDnc1 | YPDnc2 | YPDnc3 | YPDnc4 | EtOHnc1 | EtOHnc2 | Galnc1 | Galnc2 |
| 13 PPT2   | YPL148C   | YPDcl2 | YPDcl3 | EtOHcl1 | EtOHcl2 | Galcl1 | YPDnc1 | YPDnc2 | YPDnc3 | YPDnc4 | EtOHnc1 | EtOHnc2 | Galnc1 | Galnc2 |
| 13 YPT1   | YFL038C   | YPDcl2 | YPDcl3 | EtOHcl1 | EtOHcl2 | Galcl1 | YPDnc1 | YPDnc2 | YPDnc3 | YPDnc4 | EtOHnc1 | EtOHnc2 | Galnc1 | Galnc2 |
| 13 HSP82  | YPL240C   | YPDcl2 | YPDcl3 | EtOHcl1 | EtOHcl2 | Galcl1 | YPDnc1 | YPDnc2 | YPDnc3 | YPDnc4 | EtOHnc1 | EtOHnc2 | Galnc1 | Galnc2 |
| 13 PRM2   | YIL037C   | YPDcl2 | YPDcl3 | EtOHcl1 | EtOHcl2 | Galcl1 | YPDnc1 | YPDnc2 | YPDnc3 | YPDnc4 | EtOHnc1 | EtOHnc2 | Galnc1 | Galnc2 |
| 13 TIP20  | YGL145W   | YPDcl2 | YPDcl3 | EtOHcl1 | EtOHcl2 | Galcl1 | YPDnc1 | YPDnc2 | YPDnc3 | YPDnc4 | EtOHnc1 | EtOHnc2 | Galnc1 | Galnc2 |
| 13 ARO7   | YPR060C   | YPDcl2 | YPDcl3 | EtOHcl1 | EtOHcl2 | Galcl1 | YPDnc1 | YPDnc2 | YPDnc3 | YPDnc4 | EtOHnc1 | EtOHnc2 | Galnc1 | Galnc2 |
| 13 HRB1   | YNL004W   | YPDcl2 | YPDcl3 | EtOHcl1 | EtOHcl2 | Galcl1 | YPDnc1 | YPDnc2 | YPDnc3 | YPDnc4 | EtOHnc1 | EtOHnc2 | Galnc1 | Galnc2 |
| 13        | YLR232W   | YPDcl2 | YPDcl3 | EtOHcl1 | EtOHcl2 | Galcl1 | YPDnc1 | YPDnc2 | YPDnc3 | YPDnc4 | EtOHnc1 | EtOHnc2 | Galnc1 | Galnc2 |
| 13 RRP4   | YHR069C   | YPDcl2 | YPDcl3 | EtOHcl1 | EtOHcl2 | Galcl1 | YPDnc1 | YPDnc2 | YPDnc3 | YPDnc4 | EtOHnc1 | EtOHnc2 | Galnc1 | Galnc2 |
| 13        | YEL043W   | YPDcl2 | YPDcl3 | EtOHcl1 | EtOHcl2 | Galcl1 | YPDnc1 | YPDnc2 | YPDnc3 | YPDnc4 | EtOHnc1 | EtOHnc2 | Galnc1 | Galnc2 |
| 13 CWC24  | YLR323C   | YPDcl2 | YPDcl3 | EtOHcl1 | EtOHcl2 | Galcl1 | YPDnc1 | YPDnc2 | YPDnc3 | YPDnc4 | EtOHnc1 | EtOHnc2 | Galnc1 | Galnc2 |
| 13 KTR6   | YPL053C   | YPDcl2 | YPDcl3 | EtOHcl1 | EtOHcl2 | Galcl1 | YPDnc1 | YPDnc2 | YPDnc3 | YPDnc4 | EtOHnc1 | EtOHnc2 | Galnc1 | Galnc2 |
| 13 NUP49  | YGL172W   | YPDcl2 | YPDcl3 | EtOHcl1 | EtOHcl2 | Galcl1 | YPDnc1 | YPDnc2 | YPDnc3 | YPDnc4 | EtOHnc1 | EtOHnc2 | Galnc1 | Galnc2 |
| 13        | YKL162C   | YPDcl2 | YPDcl3 | EtOHcl1 | EtOHcl2 | Galcl1 | YPDnc1 | YPDnc2 | YPDnc3 | YPDnc4 | EtOHnc1 | EtOHnc2 | Galnc1 | Galnc2 |
| 13 RIM101 | YHL027W   | YPDcl2 | YPDcl3 | EtOHcl1 | EtOHcl2 | Galcl1 | YPDnc1 | YPDnc2 | YPDnc3 | YPDnc4 | EtOHnc1 | EtOHnc2 | Galnc1 | Galnc2 |
| 13 NIP7   | YPL211W   | YPDcl2 | YPDcl3 | EtOHcl1 | EtOHcl2 | Galcl1 | YPDnc1 | YPDnc2 | YPDnc3 | YPDnc4 | EtOHnc1 | EtOHnc2 | Galnc1 | Galnc2 |
| 13 PPN1   | YDR452W   | YPDcl2 | YPDcl3 | EtOHcl1 | EtOHcl2 | Galcl1 | YPDnc1 | YPDnc2 | YPDnc3 | YPDnc4 | EtOHnc1 | EtOHnc2 | Galnc1 | Galnc2 |

|           |         |        |        |         |         |        |        |        |        |        |         |         |        |        |
|-----------|---------|--------|--------|---------|---------|--------|--------|--------|--------|--------|---------|---------|--------|--------|
| 13        | YOL047C | YPDcl2 | YPDcl3 | EtOHcl1 | EtOHcl2 | Galcl1 | YPDnc1 | YPDnc2 | YPDnc3 | YPDnc4 | EtOHnc1 | EtOHnc2 | Galnc1 | Galnc2 |
| 13 SMD3   | YLR147C | YPDcl2 | YPDcl3 | EtOHcl1 | EtOHcl2 | Galcl1 | YPDnc1 | YPDnc2 | YPDnc3 | YPDnc4 | EtOHnc1 | EtOHnc2 | Galnc1 | Galnc2 |
| 13 ERP3   | YDL018C | YPDcl2 | YPDcl3 | EtOHcl1 | EtOHcl2 | Galcl1 | YPDnc1 | YPDnc2 | YPDnc3 | YPDnc4 | EtOHnc1 | EtOHnc2 | Galnc1 | Galnc2 |
| 13 ERV25  | YML012W | YPDcl2 | YPDcl3 | EtOHcl1 | EtOHcl2 | Galcl1 | YPDnc1 | YPDnc2 | YPDnc3 | YPDnc4 | EtOHnc1 | EtOHnc2 | Galnc1 | Galnc2 |
| 13 SNP1   | YIL061C | YPDcl2 | YPDcl3 | EtOHcl1 | EtOHcl2 | Galcl1 | YPDnc1 | YPDnc2 | YPDnc3 | YPDnc4 | EtOHnc1 | EtOHnc2 | Galnc1 | Galnc2 |
| 13 IKI1   | YHR187W | YPDcl2 | YPDcl3 | EtOHcl1 | EtOHcl2 | Galcl1 | YPDnc1 | YPDnc2 | YPDnc3 | YPDnc4 | EtOHnc1 | EtOHnc2 | Galnc1 | Galnc2 |
| 13 TIS11  | YLR136C | YPDcl2 | YPDcl3 | EtOHcl1 | EtOHcl2 | Galcl1 | YPDnc1 | YPDnc2 | YPDnc3 | YPDnc4 | EtOHnc1 | EtOHnc2 | Galnc1 | Galnc2 |
| 13 MMS22  | YLR320W | YPDcl2 | YPDcl3 | EtOHcl1 | EtOHcl2 | Galcl1 | YPDnc1 | YPDnc2 | YPDnc3 | YPDnc4 | EtOHnc1 | EtOHnc2 | Galnc1 | Galnc2 |
| 13 TSR1   | YDL060W | YPDcl2 | YPDcl3 | EtOHcl1 | EtOHcl2 | Galcl1 | YPDnc1 | YPDnc2 | YPDnc3 | YPDnc4 | EtOHnc1 | EtOHnc2 | Galnc1 | Galnc2 |
| 13 KTR7   | YIL085C | YPDcl2 | YPDcl3 | EtOHcl1 | EtOHcl2 | Galcl1 | YPDnc1 | YPDnc2 | YPDnc3 | YPDnc4 | EtOHnc1 | EtOHnc2 | Galnc1 | Galnc2 |
| 13 PPE1   | YHR075C | YPDcl2 | YPDcl3 | EtOHcl1 | EtOHcl2 | Galcl1 | YPDnc1 | YPDnc2 | YPDnc3 | YPDnc4 | EtOHnc1 | EtOHnc2 | Galnc1 | Galnc2 |
| 13 GCN1   | YGL195W | YPDcl2 | YPDcl3 | EtOHcl1 | EtOHcl2 | Galcl1 | YPDnc1 | YPDnc2 | YPDnc3 | YPDnc4 | EtOHnc1 | EtOHnc2 | Galnc1 | Galnc2 |
| 13 MCH4   | YOL119C | YPDcl2 | YPDcl3 | EtOHcl1 | EtOHcl2 | Galcl1 | YPDnc1 | YPDnc2 | YPDnc3 | YPDnc4 | EtOHnc1 | EtOHnc2 | Galnc1 | Galnc2 |
| 13 PCL1   | YNL289W | YPDcl2 | YPDcl3 | EtOHcl1 | EtOHcl2 | Galcl1 | YPDnc1 | YPDnc2 | YPDnc3 | YPDnc4 | EtOHnc1 | EtOHnc2 | Galnc1 | Galnc2 |
| 13 ADO1   | YJR105W | YPDcl2 | YPDcl3 | EtOHcl1 | EtOHcl2 | Galcl1 | YPDnc1 | YPDnc2 | YPDnc3 | YPDnc4 | EtOHnc1 | EtOHnc2 | Galnc1 | Galnc2 |
| 13 SPT2   | YER161C | YPDcl2 | YPDcl3 | EtOHcl1 | EtOHcl2 | Galcl1 | YPDnc1 | YPDnc2 | YPDnc3 | YPDnc4 | EtOHnc1 | EtOHnc2 | Galnc1 | Galnc2 |
| 13 MRPS12 | YNR036C | YPDcl2 | YPDcl3 | EtOHcl1 | EtOHcl2 | Galcl1 | YPDnc1 | YPDnc2 | YPDnc3 | YPDnc4 | EtOHnc1 | EtOHnc2 | Galnc1 | Galnc2 |
| 13 RKR1   | YMR247C | YPDcl2 | YPDcl3 | EtOHcl1 | EtOHcl2 | Galcl1 | YPDnc1 | YPDnc2 | YPDnc3 | YPDnc4 | EtOHnc1 | EtOHnc2 | Galnc1 | Galnc2 |
| 13        | YMR111C | YPDcl2 | YPDcl3 | EtOHcl1 | EtOHcl2 | Galcl1 | YPDnc1 | YPDnc2 | YPDnc3 | YPDnc4 | EtOHnc1 | EtOHnc2 | Galnc1 | Galnc2 |
| 13 MRPL49 | YJL096W | YPDcl2 | YPDcl3 | EtOHcl1 | EtOHcl2 | Galcl1 | YPDnc1 | YPDnc2 | YPDnc3 | YPDnc4 | EtOHnc1 | EtOHnc2 | Galnc1 | Galnc2 |
| 13 MPE1   | YKL059C | YPDcl2 | YPDcl3 | EtOHcl1 | EtOHcl2 | Galcl1 | YPDnc1 | YPDnc2 | YPDnc3 | YPDnc4 | EtOHnc1 | EtOHnc2 | Galnc1 | Galnc2 |
| 13        | YMR090W | YPDcl2 | YPDcl3 | EtOHcl1 | EtOHcl2 | Galcl1 | YPDnc1 | YPDnc2 | YPDnc3 | YPDnc4 | EtOHnc1 | EtOHnc2 | Galnc1 | Galnc2 |
| 13        | YNR061C | YPDcl2 | YPDcl3 | EtOHcl1 | EtOHcl2 | Galcl1 | YPDnc1 | YPDnc2 | YPDnc3 | YPDnc4 | EtOHnc1 | EtOHnc2 | Galnc1 | Galnc2 |
| 13        | YGR235C | YPDcl2 | YPDcl3 | EtOHcl1 | EtOHcl2 | Galcl1 | YPDnc1 | YPDnc2 | YPDnc3 | YPDnc4 | EtOHnc1 | EtOHnc2 | Galnc1 | Galnc2 |
| 13 NUP57  | YGR119C | YPDcl2 | YPDcl3 | EtOHcl1 | EtOHcl2 | Galcl1 | YPDnc1 | YPDnc2 | YPDnc3 | YPDnc4 | EtOHnc1 | EtOHnc2 | Galnc1 | Galnc2 |
| 13        | YER121W | YPDcl2 | YPDcl3 | EtOHcl1 | EtOHcl2 | Galcl1 | YPDnc1 | YPDnc2 | YPDnc3 | YPDnc4 | EtOHnc1 | EtOHnc2 | Galnc1 | Galnc2 |
| 13 YCK2   | YNL154C | YPDcl2 | YPDcl3 | EtOHcl1 | EtOHcl2 | Galcl1 | YPDnc1 | YPDnc2 | YPDnc3 | YPDnc4 | EtOHnc1 | EtOHnc2 | Galnc1 | Galnc2 |
| 13 TRX2   | YGR209C | YPDcl2 | YPDcl3 | EtOHcl1 | EtOHcl2 | Galcl1 | YPDnc1 | YPDnc2 | YPDnc3 | YPDnc4 | EtOHnc1 | EtOHnc2 | Galnc1 | Galnc2 |
| 13 PRX1   | YBL064C | YPDcl2 | YPDcl3 | EtOHcl1 | EtOHcl2 | Galcl1 | YPDnc1 | YPDnc2 | YPDnc3 | YPDnc4 | EtOHnc1 | EtOHnc2 | Galnc1 | Galnc2 |
| 13        | YDL012C | YPDcl2 | YPDcl3 | EtOHcl1 | EtOHcl2 | Galcl1 | YPDnc1 | YPDnc2 | YPDnc3 | YPDnc4 | EtOHnc1 | EtOHnc2 | Galnc1 | Galnc2 |
| 13 INH1   | YDL181W | YPDcl2 | YPDcl3 | EtOHcl1 | EtOHcl2 | Galcl1 | YPDnc1 | YPDnc2 | YPDnc3 | YPDnc4 | EtOHnc1 | EtOHnc2 | Galnc1 | Galnc2 |
| 13 MAE1   | YKL029C | YPDcl2 | YPDcl3 | EtOHcl1 | EtOHcl2 | Galcl1 | YPDnc1 | YPDnc2 | YPDnc3 | YPDnc4 | EtOHnc1 | EtOHnc2 | Galnc1 | Galnc2 |
| 13 ISR1   | YPR106W | YPDcl2 | YPDcl3 | EtOHcl1 | EtOHcl2 | Galcl1 | YPDnc1 | YPDnc2 | YPDnc3 | YPDnc4 | EtOHnc1 | EtOHnc2 | Galnc1 | Galnc2 |
| 13 ATG9   | YDL149W | YPDcl2 | YPDcl3 | EtOHcl1 | EtOHcl2 | Galcl1 | YPDnc1 | YPDnc2 | YPDnc3 | YPDnc4 | EtOHnc1 | EtOHnc2 | Galnc1 | Galnc2 |

|    |        |         |        |        |         |         |        |        |        |        |        |         |         |        |        |
|----|--------|---------|--------|--------|---------|---------|--------|--------|--------|--------|--------|---------|---------|--------|--------|
| 13 | NSE1   | YLR007W | YPDcl2 | YPDcl3 | EtOHcl1 | EtOHcl2 | Galcl1 | YPDnc1 | YPDnc2 | YPDnc3 | YPDnc4 | EtOHnc1 | EtOHnc2 | Galnc1 | Galnc2 |
| 13 | HGH1   | YGR187C | YPDcl2 | YPDcl3 | EtOHcl1 | EtOHcl2 | Galcl1 | YPDnc1 | YPDnc2 | YPDnc3 | YPDnc4 | EtOHnc1 | EtOHnc2 | Galnc1 | Galnc2 |
| 13 | ADK2   | YER170W | YPDcl2 | YPDcl3 | EtOHcl1 | EtOHcl2 | Galcl1 | YPDnc1 | YPDnc2 | YPDnc3 | YPDnc4 | EtOHnc1 | EtOHnc2 | Galnc1 | Galnc2 |
| 13 | KAR9   | YPL269W | YPDcl2 | YPDcl3 | EtOHcl1 | EtOHcl2 | Galcl1 | YPDnc1 | YPDnc2 | YPDnc3 | YPDnc4 | EtOHnc1 | EtOHnc2 | Galnc1 | Galnc2 |
| 13 | PRP22  | YER013W | YPDcl2 | YPDcl3 | EtOHcl1 | EtOHcl2 | Galcl1 | YPDnc1 | YPDnc2 | YPDnc3 | YPDnc4 | EtOHnc1 | EtOHnc2 | Galnc1 | Galnc2 |
| 13 | TRS120 | YDR407C | YPDcl2 | YPDcl3 | EtOHcl1 | EtOHcl2 | Galcl1 | YPDnc1 | YPDnc2 | YPDnc3 | YPDnc4 | EtOHnc1 | EtOHnc2 | Galnc1 | Galnc2 |
| 13 | PEF1   | YGR058W | YPDcl2 | YPDcl3 | EtOHcl1 | EtOHcl2 | Galcl1 | YPDnc1 | YPDnc2 | YPDnc3 | YPDnc4 | EtOHnc1 | EtOHnc2 | Galnc1 | Galnc2 |
| 13 | URM1   | YIL008W | YPDcl2 | YPDcl3 | EtOHcl1 | EtOHcl2 | Galcl1 | YPDnc1 | YPDnc2 | YPDnc3 | YPDnc4 | EtOHnc1 | EtOHnc2 | Galnc1 | Galnc2 |
| 13 | BIG1   | YHR101C | YPDcl2 | YPDcl3 | EtOHcl1 | EtOHcl2 | Galcl1 | YPDnc1 | YPDnc2 | YPDnc3 | YPDnc4 | EtOHnc1 | EtOHnc2 | Galnc1 | Galnc2 |
| 13 | SMB1   | YER029C | YPDcl2 | YPDcl3 | EtOHcl1 | EtOHcl2 | Galcl1 | YPDnc1 | YPDnc2 | YPDnc3 | YPDnc4 | EtOHnc1 | EtOHnc2 | Galnc1 | Galnc2 |
| 13 | RRT8   | YOL048C | YPDcl2 | YPDcl3 | EtOHcl1 | EtOHcl2 | Galcl1 | YPDnc1 | YPDnc2 | YPDnc3 | YPDnc4 | EtOHnc1 | EtOHnc2 | Galnc1 | Galnc2 |
| 13 | RRN7   | YJL025W | YPDcl2 | YPDcl3 | EtOHcl1 | EtOHcl2 | Galcl1 | YPDnc1 | YPDnc2 | YPDnc3 | YPDnc4 | EtOHnc1 | EtOHnc2 | Galnc1 | Galnc2 |
| 13 | RPN9   | YDR427W | YPDcl2 | YPDcl3 | EtOHcl1 | EtOHcl2 | Galcl1 | YPDnc1 | YPDnc2 | YPDnc3 | YPDnc4 | EtOHnc1 | EtOHnc2 | Galnc1 | Galnc2 |
| 13 | SKG3   | YLR187W | YPDcl2 | YPDcl3 | EtOHcl1 | EtOHcl2 | Galcl1 | YPDnc1 | YPDnc2 | YPDnc3 | YPDnc4 | EtOHnc1 | EtOHnc2 | Galnc1 | Galnc2 |
| 13 | FMP10  | YER182W | YPDcl2 | YPDcl3 | EtOHcl1 | EtOHcl2 | Galcl1 | YPDnc1 | YPDnc2 | YPDnc3 | YPDnc4 | EtOHnc1 | EtOHnc2 | Galnc1 | Galnc2 |
| 13 | PSO2   | YMR137C | YPDcl2 | YPDcl3 | EtOHcl1 | EtOHcl2 | Galcl1 | YPDnc1 | YPDnc2 | YPDnc3 | YPDnc4 | EtOHnc1 | EtOHnc2 | Galnc1 | Galnc2 |
| 13 | SPT20  | YOL148C | YPDcl2 | YPDcl3 | EtOHcl1 | EtOHcl2 | Galcl1 | YPDnc1 | YPDnc2 | YPDnc3 | YPDnc4 | EtOHnc1 | EtOHnc2 | Galnc1 | Galnc2 |
| 13 | MTF1   | YMR228W | YPDcl2 | YPDcl3 | EtOHcl1 | EtOHcl2 | Galcl1 | YPDnc1 | YPDnc2 | YPDnc3 | YPDnc4 | EtOHnc1 | EtOHnc2 | Galnc1 | Galnc2 |
| 13 |        | YBR232C | YPDcl2 | YPDcl3 | EtOHcl1 | EtOHcl2 | Galcl1 | YPDnc1 | YPDnc2 | YPDnc3 | YPDnc4 | EtOHnc1 | EtOHnc2 | Galnc1 | Galnc2 |
| 13 | DFM1   | YDR411C | YPDcl2 | YPDcl3 | EtOHcl1 | EtOHcl2 | Galcl1 | YPDnc1 | YPDnc2 | YPDnc3 | YPDnc4 | EtOHnc1 | EtOHnc2 | Galnc1 | Galnc2 |
| 13 | NOP2   | YNL061W | YPDcl2 | YPDcl3 | EtOHcl1 | EtOHcl2 | Galcl1 | YPDnc1 | YPDnc2 | YPDnc3 | YPDnc4 | EtOHnc1 | EtOHnc2 | Galnc1 | Galnc2 |
| 13 | GIC2   | YDR309C | YPDcl2 | YPDcl3 | EtOHcl1 | EtOHcl2 | Galcl1 | YPDnc1 | YPDnc2 | YPDnc3 | YPDnc4 | EtOHnc1 | EtOHnc2 | Galnc1 | Galnc2 |
| 13 | RAD51  | YER095W | YPDcl2 | YPDcl3 | EtOHcl1 | EtOHcl2 | Galcl1 | YPDnc1 | YPDnc2 | YPDnc3 | YPDnc4 | EtOHnc1 | EtOHnc2 | Galnc1 | Galnc2 |
| 13 | TIF2   | YJL138C | YPDcl2 | YPDcl3 | EtOHcl1 | EtOHcl2 | Galcl1 | YPDnc1 | YPDnc2 | YPDnc3 | YPDnc4 | EtOHnc1 | EtOHnc2 | Galnc1 | Galnc2 |
| 13 | ECM9   | YKR004C | YPDcl2 | YPDcl3 | EtOHcl1 | EtOHcl2 | Galcl1 | YPDnc1 | YPDnc2 | YPDnc3 | YPDnc4 | EtOHnc1 | EtOHnc2 | Galnc1 | Galnc2 |
| 13 | MRPL8  | YJL063C | YPDcl2 | YPDcl3 | EtOHcl1 | EtOHcl2 | Galcl1 | YPDnc1 | YPDnc2 | YPDnc3 | YPDnc4 | EtOHnc1 | EtOHnc2 | Galnc1 | Galnc2 |
| 13 |        | YMR206W | YPDcl2 | YPDcl3 | EtOHcl1 | EtOHcl2 | Galcl1 | YPDnc1 | YPDnc2 | YPDnc3 | YPDnc4 | EtOHnc1 | EtOHnc2 | Galnc1 | Galnc2 |
| 13 | RIM13  | YMR154C | YPDcl2 | YPDcl3 | EtOHcl1 | EtOHcl2 | Galcl1 | YPDnc1 | YPDnc2 | YPDnc3 | YPDnc4 | EtOHnc1 | EtOHnc2 | Galnc1 | Galnc2 |
| 13 | IES5   | YER092W | YPDcl2 | YPDcl3 | EtOHcl1 | EtOHcl2 | Galcl1 | YPDnc1 | YPDnc2 | YPDnc3 | YPDnc4 | EtOHnc1 | EtOHnc2 | Galnc1 | Galnc2 |
| 13 | FES1   | YBR101C | YPDcl2 | YPDcl3 | EtOHcl1 | EtOHcl2 | Galcl1 | YPDnc1 | YPDnc2 | YPDnc3 | YPDnc4 | EtOHnc1 | EtOHnc2 | Galnc1 | Galnc2 |
| 13 | PKP1   | YIL042C | YPDcl2 | YPDcl3 | EtOHcl1 | EtOHcl2 | Galcl1 | YPDnc1 | YPDnc2 | YPDnc3 | YPDnc4 | EtOHnc1 | EtOHnc2 | Galnc1 | Galnc2 |
| 13 | SIN3   | YOL004W | YPDcl2 | YPDcl3 | EtOHcl1 | EtOHcl2 | Galcl1 | YPDnc1 | YPDnc2 | YPDnc3 | YPDnc4 | EtOHnc1 | EtOHnc2 | Galnc1 | Galnc2 |
| 13 |        | YHR112C | YPDcl2 | YPDcl3 | EtOHcl1 | EtOHcl2 | Galcl1 | YPDnc1 | YPDnc2 | YPDnc3 | YPDnc4 | EtOHnc1 | EtOHnc2 | Galnc1 | Galnc2 |
| 13 | CGR1   | YGL029W | YPDcl2 | YPDcl3 | EtOHcl1 | EtOHcl2 | Galcl1 | YPDnc1 | YPDnc2 | YPDnc3 | YPDnc4 | EtOHnc1 | EtOHnc2 | Galnc1 | Galnc2 |

|          |           |        |        |         |         |        |        |        |        |        |         |         |        |        |
|----------|-----------|--------|--------|---------|---------|--------|--------|--------|--------|--------|---------|---------|--------|--------|
| 13 CBF1  | YJR060W   | YPDcl2 | YPDcl3 | EtOHcl1 | EtOHcl2 | Galcl1 | YPDnc1 | YPDnc2 | YPDnc3 | YPDnc4 | EtOHnc1 | EtOHnc2 | Galnc1 | Galnc2 |
| 13 GPI19 | YDR437W   | YPDcl2 | YPDcl3 | EtOHcl1 | EtOHcl2 | Galcl1 | YPDnc1 | YPDnc2 | YPDnc3 | YPDnc4 | EtOHnc1 | EtOHnc2 | Galnc1 | Galnc2 |
| 13 SPO11 | YHL022C   | YPDcl2 | YPDcl3 | EtOHcl1 | EtOHcl2 | Galcl1 | YPDnc1 | YPDnc2 | YPDnc3 | YPDnc4 | EtOHnc1 | EtOHnc2 | Galnc1 | Galnc2 |
| 13 SAE2  | YGL175C   | YPDcl2 | YPDcl3 | EtOHcl1 | EtOHcl2 | Galcl1 | YPDnc1 | YPDnc2 | YPDnc3 | YPDnc4 | EtOHnc1 | EtOHnc2 | Galnc1 | Galnc2 |
| 13 STT4  | YLR305C   | YPDcl2 | YPDcl3 | EtOHcl1 | EtOHcl2 | Galcl1 | YPDnc1 | YPDnc2 | YPDnc3 | YPDnc4 | EtOHnc1 | EtOHnc2 | Galnc1 | Galnc2 |
| 13       | YOR343C   | YPDcl2 | YPDcl3 | EtOHcl1 | EtOHcl2 | Galcl1 | YPDnc1 | YPDnc2 | YPDnc3 | YPDnc4 | EtOHnc1 | EtOHnc2 | Galnc1 | Galnc2 |
| 13 YHB1  | YGR234W   | YPDcl2 | YPDcl3 | EtOHcl1 | EtOHcl2 | Galcl1 | YPDnc1 | YPDnc2 | YPDnc3 | YPDnc4 | EtOHnc1 | EtOHnc2 | Galnc1 | Galnc2 |
| 13       | YKL115C   | YPDcl2 | YPDcl3 | EtOHcl1 | EtOHcl2 | Galcl1 | YPDnc1 | YPDnc2 | YPDnc3 | YPDnc4 | EtOHnc1 | EtOHnc2 | Galnc1 | Galnc2 |
| 13 TFA1  | YKL028W   | YPDcl2 | YPDcl3 | EtOHcl1 | EtOHcl2 | Galcl1 | YPDnc1 | YPDnc2 | YPDnc3 | YPDnc4 | EtOHnc1 | EtOHnc2 | Galnc1 | Galnc2 |
| 13 VPS4  | YPR173C   | YPDcl2 | YPDcl3 | EtOHcl1 | EtOHcl2 | Galcl1 | YPDnc1 | YPDnc2 | YPDnc3 | YPDnc4 | EtOHnc1 | EtOHnc2 | Galnc1 | Galnc2 |
| 13 SWC3  | YAL011W   | YPDcl2 | YPDcl3 | EtOHcl1 | EtOHcl2 | Galcl1 | YPDnc1 | YPDnc2 | YPDnc3 | YPDnc4 | EtOHnc1 | EtOHnc2 | Galnc1 | Galnc2 |
| 13 PRM10 | YJL108C   | YPDcl2 | YPDcl3 | EtOHcl1 | EtOHcl2 | Galcl1 | YPDnc1 | YPDnc2 | YPDnc3 | YPDnc4 | EtOHnc1 | EtOHnc2 | Galnc1 | Galnc2 |
| 13 VMA10 | YHR039C-A | YPDcl2 | YPDcl3 | EtOHcl1 | EtOHcl2 | Galcl1 | YPDnc1 | YPDnc2 | YPDnc3 | YPDnc4 | EtOHnc1 | EtOHnc2 | Galnc1 | Galnc2 |
| 13 FAR10 | YLR238W   | YPDcl2 | YPDcl3 | EtOHcl1 | EtOHcl2 | Galcl1 | YPDnc1 | YPDnc2 | YPDnc3 | YPDnc4 | EtOHnc1 | EtOHnc2 | Galnc1 | Galnc2 |
| 13 YE H2 | YLR020C   | YPDcl2 | YPDcl3 | EtOHcl1 | EtOHcl2 | Galcl1 | YPDnc1 | YPDnc2 | YPDnc3 | YPDnc4 | EtOHnc1 | EtOHnc2 | Galnc1 | Galnc2 |
| 13       | YEL020C   | YPDcl2 | YPDcl3 | EtOHcl1 | EtOHcl2 | Galcl1 | YPDnc1 | YPDnc2 | YPDnc3 | YPDnc4 | EtOHnc1 | EtOHnc2 | Galnc1 | Galnc2 |
| 13 NPP2  | YEL016C   | YPDcl2 | YPDcl3 | EtOHcl1 | EtOHcl2 | Galcl1 | YPDnc1 | YPDnc2 | YPDnc3 | YPDnc4 | EtOHnc1 | EtOHnc2 | Galnc1 | Galnc2 |
| 13       | YIL156W-B | YPDcl2 | YPDcl3 | EtOHcl1 | EtOHcl2 | Galcl1 | YPDnc1 | YPDnc2 | YPDnc3 | YPDnc4 | EtOHnc1 | EtOHnc2 | Galnc1 | Galnc2 |
| 13 DUF1  | YOL087C   | YPDcl2 | YPDcl3 | EtOHcl1 | EtOHcl2 | Galcl1 | YPDnc1 | YPDnc2 | YPDnc3 | YPDnc4 | EtOHnc1 | EtOHnc2 | Galnc1 | Galnc2 |
| 13 RSC30 | YHR056C   | YPDcl2 | YPDcl3 | EtOHcl1 | EtOHcl2 | Galcl1 | YPDnc1 | YPDnc2 | YPDnc3 | YPDnc4 | EtOHnc1 | EtOHnc2 | Galnc1 | Galnc2 |
| 13       | YNL092W   | YPDcl2 | YPDcl3 | EtOHcl1 | EtOHcl2 | Galcl1 | YPDnc1 | YPDnc2 | YPDnc3 | YPDnc4 | EtOHnc1 | EtOHnc2 | Galnc1 | Galnc2 |
| 13 RRD2  | YPL152W   | YPDcl2 | YPDcl3 | EtOHcl1 | EtOHcl2 | Galcl1 | YPDnc1 | YPDnc2 | YPDnc3 | YPDnc4 | EtOHnc1 | EtOHnc2 | Galnc1 | Galnc2 |
| 13 YMR1  | YJR110W   | YPDcl2 | YPDcl3 | EtOHcl1 | EtOHcl2 | Galcl1 | YPDnc1 | YPDnc2 | YPDnc3 | YPDnc4 | EtOHnc1 | EtOHnc2 | Galnc1 | Galnc2 |
| 13 MAG2  | YLR427W   | YPDcl2 | YPDcl3 | EtOHcl1 | EtOHcl2 | Galcl1 | YPDnc1 | YPDnc2 | YPDnc3 | YPDnc4 | EtOHnc1 | EtOHnc2 | Galnc1 | Galnc2 |
| 13 OLA1  | YBR025C   | YPDcl2 | YPDcl3 | EtOHcl1 | EtOHcl2 | Galcl1 | YPDnc1 | YPDnc2 | YPDnc3 | YPDnc4 | EtOHnc1 | EtOHnc2 | Galnc1 | Galnc2 |
| 13       | YNL208W   | YPDcl2 | YPDcl3 | EtOHcl1 | EtOHcl2 | Galcl1 | YPDnc1 | YPDnc2 | YPDnc3 | YPDnc4 | EtOHnc1 | EtOHnc2 | Galnc1 | Galnc2 |
| 13 RPS5  | YJR123W   | YPDcl2 | YPDcl3 | EtOHcl1 | EtOHcl2 | Galcl1 | YPDnc1 | YPDnc2 | YPDnc3 | YPDnc4 | EtOHnc1 | EtOHnc2 | Galnc1 | Galnc2 |
| 13 TEP1  | YNL128W   | YPDcl2 | YPDcl3 | EtOHcl1 | EtOHcl2 | Galcl1 | YPDnc1 | YPDnc2 | YPDnc3 | YPDnc4 | EtOHnc1 | EtOHnc2 | Galnc1 | Galnc2 |
| 13 MRP20 | YDR405W   | YPDcl2 | YPDcl3 | EtOHcl1 | EtOHcl2 | Galcl1 | YPDnc1 | YPDnc2 | YPDnc3 | YPDnc4 | EtOHnc1 | EtOHnc2 | Galnc1 | Galnc2 |
| 13 RAD54 | YGL163C   | YPDcl2 | YPDcl3 | EtOHcl1 | EtOHcl2 | Galcl1 | YPDnc1 | YPDnc2 | YPDnc3 | YPDnc4 | EtOHnc1 | EtOHnc2 | Galnc1 | Galnc2 |
| 13 RIM11 | YMR139W   | YPDcl2 | YPDcl3 | EtOHcl1 | EtOHcl2 | Galcl1 | YPDnc1 | YPDnc2 | YPDnc3 | YPDnc4 | EtOHnc1 | EtOHnc2 | Galnc1 | Galnc2 |
| 13 PBS2  | YJL128C   | YPDcl2 | YPDcl3 | EtOHcl1 | EtOHcl2 | Galcl1 | YPDnc1 | YPDnc2 | YPDnc3 | YPDnc4 | EtOHnc1 | EtOHnc2 | Galnc1 | Galnc2 |
| 13       | YDR442W   | YPDcl2 | YPDcl3 | EtOHcl1 | EtOHcl2 | Galcl1 | YPDnc1 | YPDnc2 | YPDnc3 | YPDnc4 | EtOHnc1 | EtOHnc2 | Galnc1 | Galnc2 |
| 13 TIM22 | YDL217C   | YPDcl2 | YPDcl3 | EtOHcl1 | EtOHcl2 | Galcl1 | YPDnc1 | YPDnc2 | YPDnc3 | YPDnc4 | EtOHnc1 | EtOHnc2 | Galnc1 | Galnc2 |

|          |           |        |        |         |         |        |        |        |        |        |         |         |        |        |
|----------|-----------|--------|--------|---------|---------|--------|--------|--------|--------|--------|---------|---------|--------|--------|
| 13 SEC62 | YPL094C   | YPDcl2 | YPDcl3 | EtOHcl1 | EtOHcl2 | Galcl1 | YPDnc1 | YPDnc2 | YPDnc3 | YPDnc4 | EtOHnc1 | EtOHnc2 | Galnc1 | Galnc2 |
| 13       | YOL085C   | YPDcl2 | YPDcl3 | EtOHcl1 | EtOHcl2 | Galcl1 | YPDnc1 | YPDnc2 | YPDnc3 | YPDnc4 | EtOHnc1 | EtOHnc2 | Galnc1 | Galnc2 |
| 13       | YAL037C-A | YPDcl2 | YPDcl3 | EtOHcl1 | EtOHcl2 | Galcl1 | YPDnc1 | YPDnc2 | YPDnc3 | YPDnc4 | EtOHnc1 | EtOHnc2 | Galnc1 | Galnc2 |
| 13 EMI2  | YDR516C   | YPDcl2 | YPDcl3 | EtOHcl1 | EtOHcl2 | Galcl1 | YPDnc1 | YPDnc2 | YPDnc3 | YPDnc4 | EtOHnc1 | EtOHnc2 | Galnc1 | Galnc2 |
| 13 SSE1  | YPL106C   | YPDcl2 | YPDcl3 | EtOHcl1 | EtOHcl2 | Galcl1 | YPDnc1 | YPDnc2 | YPDnc3 | YPDnc4 | EtOHnc1 | EtOHnc2 | Galnc1 | Galnc2 |
| 13 HAP1  | YLR256W   | YPDcl2 | YPDcl3 | EtOHcl1 | EtOHcl2 | Galcl1 | YPDnc1 | YPDnc2 | YPDnc3 | YPDnc4 | EtOHnc1 | EtOHnc2 | Galnc1 | Galnc2 |
| 13 QCR2  | YPR191W   | YPDcl2 | YPDcl3 | EtOHcl1 | EtOHcl2 | Galcl1 | YPDnc1 | YPDnc2 | YPDnc3 | YPDnc4 | EtOHnc1 | EtOHnc2 | Galnc1 | Galnc2 |
| 13 MDM32 | YOR147W   | YPDcl2 | YPDcl3 | EtOHcl1 | EtOHcl2 | Galcl1 | YPDnc1 | YPDnc2 | YPDnc3 | YPDnc4 | EtOHnc1 | EtOHnc2 | Galnc1 | Galnc2 |
| 13 SAE3  | YHR079C-A | YPDcl2 | YPDcl3 | EtOHcl1 | EtOHcl2 | Galcl1 | YPDnc1 | YPDnc2 | YPDnc3 | YPDnc4 | EtOHnc1 | EtOHnc2 | Galnc1 | Galnc2 |
| 13 RGD1  | YBR260C   | YPDcl2 | YPDcl3 | EtOHcl1 | EtOHcl2 | Galcl1 | YPDnc1 | YPDnc2 | YPDnc3 | YPDnc4 | EtOHnc1 | EtOHnc2 | Galnc1 | Galnc2 |
| 13       | YOL079W   | YPDcl2 | YPDcl3 | EtOHcl1 | EtOHcl2 | Galcl1 | YPDnc1 | YPDnc2 | YPDnc3 | YPDnc4 | EtOHnc1 | EtOHnc2 | Galnc1 | Galnc2 |
| 13 VPS33 | YLR396C   | YPDcl2 | YPDcl3 | EtOHcl1 | EtOHcl2 | Galcl1 | YPDnc1 | YPDnc2 | YPDnc3 | YPDnc4 | EtOHnc1 | EtOHnc2 | Galnc1 | Galnc2 |
| 13 RSM19 | YNR037C   | YPDcl2 | YPDcl3 | EtOHcl1 | EtOHcl2 | Galcl1 | YPDnc1 | YPDnc2 | YPDnc3 | YPDnc4 | EtOHnc1 | EtOHnc2 | Galnc1 | Galnc2 |
| 13       | YDL109C   | YPDcl2 | YPDcl3 | EtOHcl1 | EtOHcl2 | Galcl1 | YPDnc1 | YPDnc2 | YPDnc3 | YPDnc4 | EtOHnc1 | EtOHnc2 | Galnc1 | Galnc2 |
| 13       | YCR043C   | YPDcl2 | YPDcl3 | EtOHcl1 | EtOHcl2 | Galcl1 | YPDnc1 | YPDnc2 | YPDnc3 | YPDnc4 | EtOHnc1 | EtOHnc2 | Galnc1 | Galnc2 |
| 13 MDL2  | YPL270W   | YPDcl2 | YPDcl3 | EtOHcl1 | EtOHcl2 | Galcl1 | YPDnc1 | YPDnc2 | YPDnc3 | YPDnc4 | EtOHnc1 | EtOHnc2 | Galnc1 | Galnc2 |
| 13 YRO2  | YBR054W   | YPDcl2 | YPDcl3 | EtOHcl1 | EtOHcl2 | Galcl1 | YPDnc1 | YPDnc2 | YPDnc3 | YPDnc4 | EtOHnc1 | EtOHnc2 | Galnc1 | Galnc2 |
| 13 GCD10 | YNL062C   | YPDcl2 | YPDcl3 | EtOHcl1 | EtOHcl2 | Galcl1 | YPDnc1 | YPDnc2 | YPDnc3 | YPDnc4 | EtOHnc1 | EtOHnc2 | Galnc1 | Galnc2 |
| 13 IBD2  | YNL164C   | YPDcl2 | YPDcl3 | EtOHcl1 | EtOHcl2 | Galcl1 | YPDnc1 | YPDnc2 | YPDnc3 | YPDnc4 | EtOHnc1 | EtOHnc2 | Galnc1 | Galnc2 |
| 13 AIM34 | YMR003W   | YPDcl2 | YPDcl3 | EtOHcl1 | EtOHcl2 | Galcl1 | YPDnc1 | YPDnc2 | YPDnc3 | YPDnc4 | EtOHnc1 | EtOHnc2 | Galnc1 | Galnc2 |
| 13 URA5  | YML106W   | YPDcl2 | YPDcl3 | EtOHcl1 | EtOHcl2 | Galcl1 | YPDnc1 | YPDnc2 | YPDnc3 | YPDnc4 | EtOHnc1 | EtOHnc2 | Galnc1 | Galnc2 |
| 13       | YIL029W-A | YPDcl2 | YPDcl3 | EtOHcl1 | EtOHcl2 | Galcl1 | YPDnc1 | YPDnc2 | YPDnc3 | YPDnc4 | EtOHnc1 | EtOHnc2 | Galnc1 | Galnc2 |
| 13 VPS29 | YHR012W   | YPDcl2 | YPDcl3 | EtOHcl1 | EtOHcl2 | Galcl1 | YPDnc1 | YPDnc2 | YPDnc3 | YPDnc4 | EtOHnc1 | EtOHnc2 | Galnc1 | Galnc2 |
| 13 ITR1  | YDR497C   | YPDcl2 | YPDcl3 | EtOHcl1 | EtOHcl2 | Galcl1 | YPDnc1 | YPDnc2 | YPDnc3 | YPDnc4 | EtOHnc1 | EtOHnc2 | Galnc1 | Galnc2 |
| 13 AFI1  | YOR129C   | YPDcl2 | YPDcl3 | EtOHcl1 | EtOHcl2 | Galcl1 | YPDnc1 | YPDnc2 | YPDnc3 | YPDnc4 | EtOHnc1 | EtOHnc2 | Galnc1 | Galnc2 |
| 13 RSM10 | YDR041W   | YPDcl2 | YPDcl3 | EtOHcl1 | EtOHcl2 | Galcl1 | YPDnc1 | YPDnc2 | YPDnc3 | YPDnc4 | EtOHnc1 | EtOHnc2 | Galnc1 | Galnc2 |
| 13 RPP1A | YDL081C   | YPDcl2 | YPDcl3 | EtOHcl1 | EtOHcl2 | Galcl1 | YPDnc1 | YPDnc2 | YPDnc3 | YPDnc4 | EtOHnc1 | EtOHnc2 | Galnc1 | Galnc2 |
| 13       | YBL100C   | YPDcl2 | YPDcl3 | EtOHcl1 | EtOHcl2 | Galcl1 | YPDnc1 | YPDnc2 | YPDnc3 | YPDnc4 | EtOHnc1 | EtOHnc2 | Galnc1 | Galnc2 |
| 13 UBA2  | YDR390C   | YPDcl2 | YPDcl3 | EtOHcl1 | EtOHcl2 | Galcl1 | YPDnc1 | YPDnc2 | YPDnc3 | YPDnc4 | EtOHnc1 | EtOHnc2 | Galnc1 | Galnc2 |
| 13 COG6  | YNL041C   | YPDcl2 | YPDcl3 | EtOHcl1 | EtOHcl2 | Galcl1 | YPDnc1 | YPDnc2 | YPDnc3 | YPDnc4 | EtOHnc1 | EtOHnc2 | Galnc1 | Galnc2 |
| 13 TRM8  | YDL201W   | YPDcl2 | YPDcl3 | EtOHcl1 | EtOHcl2 | Galcl1 | YPDnc1 | YPDnc2 | YPDnc3 | YPDnc4 | EtOHnc1 | EtOHnc2 | Galnc1 | Galnc2 |
| 13 TAP42 | YMR028W   | YPDcl2 | YPDcl3 | EtOHcl1 | EtOHcl2 | Galcl1 | YPDnc1 | YPDnc2 | YPDnc3 | YPDnc4 | EtOHnc1 | EtOHnc2 | Galnc1 | Galnc2 |
| 13 YEA6  | YEL006W   | YPDcl2 | YPDcl3 | EtOHcl1 | EtOHcl2 | Galcl1 | YPDnc1 | YPDnc2 | YPDnc3 | YPDnc4 | EtOHnc1 | EtOHnc2 | Galnc1 | Galnc2 |
| 13 SUI2  | YJR007W   | YPDcl2 | YPDcl3 | EtOHcl1 | EtOHcl2 | Galcl1 | YPDnc1 | YPDnc2 | YPDnc3 | YPDnc4 | EtOHnc1 | EtOHnc2 | Galnc1 | Galnc2 |

|           |           |        |        |         |         |        |        |        |        |        |         |         |        |        |
|-----------|-----------|--------|--------|---------|---------|--------|--------|--------|--------|--------|---------|---------|--------|--------|
| 13 KEX2   | YNL238W   | YPDcl2 | YPDcl3 | EtOHcl1 | EtOHcl2 | Galcl1 | YPDnc1 | YPDnc2 | YPDnc3 | YPDnc4 | EtOHnc1 | EtOHnc2 | Galnc1 | Galnc2 |
| 13        | YBR053C   | YPDcl2 | YPDcl3 | EtOHcl1 | EtOHcl2 | Galcl1 | YPDnc1 | YPDnc2 | YPDnc3 | YPDnc4 | EtOHnc1 | EtOHnc2 | Galnc1 | Galnc2 |
| 13 SOL2   | YCR073W-  | YPDcl2 | YPDcl3 | EtOHcl1 | EtOHcl2 | Galcl1 | YPDnc1 | YPDnc2 | YPDnc3 | YPDnc4 | EtOHnc1 | EtOHnc2 | Galnc1 | Galnc2 |
| 13 APQ13  | YJL075C   | YPDcl2 | YPDcl3 | EtOHcl1 | EtOHcl2 | Galcl1 | YPDnc1 | YPDnc2 | YPDnc3 | YPDnc4 | EtOHnc1 | EtOHnc2 | Galnc1 | Galnc2 |
| 13        | YGL109W   | YPDcl2 | YPDcl3 | EtOHcl1 | EtOHcl2 | Galcl1 | YPDnc1 | YPDnc2 | YPDnc3 | YPDnc4 | EtOHnc1 | EtOHnc2 | Galnc1 | Galnc2 |
| 13 GTT2   | YLL060C   | YPDcl2 | YPDcl3 | EtOHcl1 | EtOHcl2 | Galcl1 | YPDnc1 | YPDnc2 | YPDnc3 | YPDnc4 | EtOHnc1 | EtOHnc2 | Galnc1 | Galnc2 |
| 13 SFI1   | YLL003W   | YPDcl2 | YPDcl3 | EtOHcl1 | EtOHcl2 | Galcl1 | YPDnc1 | YPDnc2 | YPDnc3 | YPDnc4 | EtOHnc1 | EtOHnc2 | Galnc1 | Galnc2 |
| 13        | YBR103C-A | YPDcl2 | YPDcl3 | EtOHcl1 | EtOHcl2 | Galcl1 | YPDnc1 | YPDnc2 | YPDnc3 | YPDnc4 | EtOHnc1 | EtOHnc2 | Galnc1 | Galnc2 |
| 13 PGA3   | YML125C   | YPDcl2 | YPDcl3 | EtOHcl1 | EtOHcl2 | Galcl1 | YPDnc1 | YPDnc2 | YPDnc3 | YPDnc4 | EtOHnc1 | EtOHnc2 | Galnc1 | Galnc2 |
| 13        | YOL057W   | YPDcl2 | YPDcl3 | EtOHcl1 | EtOHcl2 | Galcl1 | YPDnc1 | YPDnc2 | YPDnc3 | YPDnc4 | EtOHnc1 | EtOHnc2 | Galnc1 | Galnc2 |
| 13 MET10  | YFR030W   | YPDcl2 | YPDcl3 | EtOHcl1 | EtOHcl2 | Galcl1 | YPDnc1 | YPDnc2 | YPDnc3 | YPDnc4 | EtOHnc1 | EtOHnc2 | Galnc1 | Galnc2 |
| 13 MCM10  | YIL150C   | YPDcl2 | YPDcl3 | EtOHcl1 | EtOHcl2 | Galcl1 | YPDnc1 | YPDnc2 | YPDnc3 | YPDnc4 | EtOHnc1 | EtOHnc2 | Galnc1 | Galnc2 |
| 13        | YOL083C-A | YPDcl2 | YPDcl3 | EtOHcl1 | EtOHcl2 | Galcl1 | YPDnc1 | YPDnc2 | YPDnc3 | YPDnc4 | EtOHnc1 | EtOHnc2 | Galnc1 | Galnc2 |
| 13 PTC1   | YDL006W   | YPDcl2 | YPDcl3 | EtOHcl1 | EtOHcl2 | Galcl1 | YPDnc1 | YPDnc2 | YPDnc3 | YPDnc4 | EtOHnc1 | EtOHnc2 | Galnc1 | Galnc2 |
| 13 CSI1   | YMR025W   | YPDcl2 | YPDcl3 | EtOHcl1 | EtOHcl2 | Galcl1 | YPDnc1 | YPDnc2 | YPDnc3 | YPDnc4 | EtOHnc1 | EtOHnc2 | Galnc1 | Galnc2 |
| 13 HER1   | YOR227W   | YPDcl2 | YPDcl3 | EtOHcl1 | EtOHcl2 | Galcl1 | YPDnc1 | YPDnc2 | YPDnc3 | YPDnc4 | EtOHnc1 | EtOHnc2 | Galnc1 | Galnc2 |
| 13        | YGR287C   | YPDcl2 | YPDcl3 | EtOHcl1 | EtOHcl2 | Galcl1 | YPDnc1 | YPDnc2 | YPDnc3 | YPDnc4 | EtOHnc1 | EtOHnc2 | Galnc1 | Galnc2 |
| 13        | YDL233W   | YPDcl2 | YPDcl3 | EtOHcl1 | EtOHcl2 | Galcl1 | YPDnc1 | YPDnc2 | YPDnc3 | YPDnc4 | EtOHnc1 | EtOHnc2 | Galnc1 | Galnc2 |
| 13        | YCL057C-A | YPDcl2 | YPDcl3 | EtOHcl1 | EtOHcl2 | Galcl1 | YPDnc1 | YPDnc2 | YPDnc3 | YPDnc4 | EtOHnc1 | EtOHnc2 | Galnc1 | Galnc2 |
| 13 PRE10  | YOR362C   | YPDcl2 | YPDcl3 | EtOHcl1 | EtOHcl2 | Galcl1 | YPDnc1 | YPDnc2 | YPDnc3 | YPDnc4 | EtOHnc1 | EtOHnc2 | Galnc1 | Galnc2 |
| 13 DSK2   | YMR276W   | YPDcl2 | YPDcl3 | EtOHcl1 | EtOHcl2 | Galcl1 | YPDnc1 | YPDnc2 | YPDnc3 | YPDnc4 | EtOHnc1 | EtOHnc2 | Galnc1 | Galnc2 |
| 13 REB1   | YBR049C   | YPDcl2 | YPDcl3 | EtOHcl1 | EtOHcl2 | Galcl1 | YPDnc1 | YPDnc2 | YPDnc3 | YPDnc4 | EtOHnc1 | EtOHnc2 | Galnc1 | Galnc2 |
| 13 RBD2   | YPL246C   | YPDcl2 | YPDcl3 | EtOHcl1 | EtOHcl2 | Galcl1 | YPDnc1 | YPDnc2 | YPDnc3 | YPDnc4 | EtOHnc1 | EtOHnc2 | Galnc1 | Galnc2 |
| 13 DLD2   | YDL178W   | YPDcl2 | YPDcl3 | EtOHcl1 | EtOHcl2 | Galcl1 | YPDnc1 | YPDnc2 | YPDnc3 | YPDnc4 | EtOHnc1 | EtOHnc2 | Galnc1 | Galnc2 |
| 13        | YOR111W   | YPDcl2 | YPDcl3 | EtOHcl1 | EtOHcl2 | Galcl1 | YPDnc1 | YPDnc2 | YPDnc3 | YPDnc4 | EtOHnc1 | EtOHnc2 | Galnc1 | Galnc2 |
| 13 NAR1   | YNL240C   | YPDcl2 | YPDcl3 | EtOHcl1 | EtOHcl2 | Galcl1 | YPDnc1 | YPDnc2 | YPDnc3 | YPDnc4 | EtOHnc1 | EtOHnc2 | Galnc1 | Galnc2 |
| 13 ATG23  | YLR431C   | YPDcl2 | YPDcl3 | EtOHcl1 | EtOHcl2 | Galcl1 | YPDnc1 | YPDnc2 | YPDnc3 | YPDnc4 | EtOHnc1 | EtOHnc2 | Galnc1 | Galnc2 |
| 13 RAM2   | YKL019W   | YPDcl2 | YPDcl3 | EtOHcl1 | EtOHcl2 | Galcl1 | YPDnc1 | YPDnc2 | YPDnc3 | YPDnc4 | EtOHnc1 | EtOHnc2 | Galnc1 | Galnc2 |
| 13        | YGR168C   | YPDcl2 | YPDcl3 | EtOHcl1 | EtOHcl2 | Galcl1 | YPDnc1 | YPDnc2 | YPDnc3 | YPDnc4 | EtOHnc1 | EtOHnc2 | Galnc1 | Galnc2 |
| 13 RPS25A | YGR027C   | YPDcl2 | YPDcl3 | EtOHcl1 | EtOHcl2 | Galcl1 | YPDnc1 | YPDnc2 | YPDnc3 | YPDnc4 | EtOHnc1 | EtOHnc2 | Galnc1 | Galnc2 |
| 13 TRK1   | YJL129C   | YPDcl2 | YPDcl3 | EtOHcl1 | EtOHcl2 | Galcl1 | YPDnc1 | YPDnc2 | YPDnc3 | YPDnc4 | EtOHnc1 | EtOHnc2 | Galnc1 | Galnc2 |
| 13 BUD19  | YJL188C   | YPDcl2 | YPDcl3 | EtOHcl1 | EtOHcl2 | Galcl1 | YPDnc1 | YPDnc2 | YPDnc3 | YPDnc4 | EtOHnc1 | EtOHnc2 | Galnc1 | Galnc2 |
| 13 SGA1   | YIL099W   | YPDcl2 | YPDcl3 | EtOHcl1 | EtOHcl2 | Galcl1 | YPDnc1 | YPDnc2 | YPDnc3 | YPDnc4 | EtOHnc1 | EtOHnc2 | Galnc1 | Galnc2 |
| 13 MCM22  | YJR135C   | YPDcl2 | YPDcl3 | EtOHcl1 | EtOHcl2 | Galcl1 | YPDnc1 | YPDnc2 | YPDnc3 | YPDnc4 | EtOHnc1 | EtOHnc2 | Galnc1 | Galnc2 |

|    |        |           |        |        |         |         |        |        |        |        |        |         |         |        |        |
|----|--------|-----------|--------|--------|---------|---------|--------|--------|--------|--------|--------|---------|---------|--------|--------|
| 13 | EXO84  | YBR102C   | YPDcl2 | YPDcl3 | EtOHcl1 | EtOHcl2 | Galcl1 | YPDnc1 | YPDnc2 | YPDnc3 | YPDnc4 | EtOHnc1 | EtOHnc2 | Galnc1 | Galnc2 |
| 13 | GAT4   | YIR013C   | YPDcl2 | YPDcl3 | EtOHcl1 | EtOHcl2 | Galcl1 | YPDnc1 | YPDnc2 | YPDnc3 | YPDnc4 | EtOHnc1 | EtOHnc2 | Galnc1 | Galnc2 |
| 13 | MKC7   | YDR144C   | YPDcl2 | YPDcl3 | EtOHcl1 | EtOHcl2 | Galcl1 | YPDnc1 | YPDnc2 | YPDnc3 | YPDnc4 | EtOHnc1 | EtOHnc2 | Galnc1 | Galnc2 |
| 13 | LYS12  | YIL094C   | YPDcl2 | YPDcl3 | EtOHcl1 | EtOHcl2 | Galcl1 | YPDnc1 | YPDnc2 | YPDnc3 | YPDnc4 | EtOHnc1 | EtOHnc2 | Galnc1 | Galnc2 |
| 13 |        | YIL002W-A | YPDcl2 | YPDcl3 | EtOHcl1 | EtOHcl2 | Galcl1 | YPDnc1 | YPDnc2 | YPDnc3 | YPDnc4 | EtOHnc1 | EtOHnc2 | Galnc1 | Galnc2 |
| 13 | AIM2   | YAL049C   | YPDcl2 | YPDcl3 | EtOHcl1 | EtOHcl2 | Galcl1 | YPDnc1 | YPDnc2 | YPDnc3 | YPDnc4 | EtOHnc1 | EtOHnc2 | Galnc1 | Galnc2 |
| 13 | CTF18  | YMR078C   | YPDcl2 | YPDcl3 | EtOHcl1 | EtOHcl2 | Galcl1 | YPDnc1 | YPDnc2 | YPDnc3 | YPDnc4 | EtOHnc1 | EtOHnc2 | Galnc1 | Galnc2 |
| 13 |        | YJL077W-A | YPDcl2 | YPDcl3 | EtOHcl1 | EtOHcl2 | Galcl1 | YPDnc1 | YPDnc2 | YPDnc3 | YPDnc4 | EtOHnc1 | EtOHnc2 | Galnc1 | Galnc2 |
| 13 | EXO70  | YJL085W   | YPDcl2 | YPDcl3 | EtOHcl1 | EtOHcl2 | Galcl1 | YPDnc1 | YPDnc2 | YPDnc3 | YPDnc4 | EtOHnc1 | EtOHnc2 | Galnc1 | Galnc2 |
| 13 | STE6   | YKL209C   | YPDcl2 | YPDcl3 | EtOHcl1 | EtOHcl2 | Galcl1 | YPDnc1 | YPDnc2 | YPDnc3 | YPDnc4 | EtOHnc1 | EtOHnc2 | Galnc1 | Galnc2 |
| 13 | PMU1   | YKL128C   | YPDcl2 | YPDcl3 | EtOHcl1 | EtOHcl2 | Galcl1 | YPDnc1 | YPDnc2 | YPDnc3 | YPDnc4 | EtOHnc1 | EtOHnc2 | Galnc1 | Galnc2 |
| 13 |        | YMR010W   | YPDcl2 | YPDcl3 | EtOHcl1 | EtOHcl2 | Galcl1 | YPDnc1 | YPDnc2 | YPDnc3 | YPDnc4 | EtOHnc1 | EtOHnc2 | Galnc1 | Galnc2 |
| 13 |        | YCR023C   | YPDcl2 | YPDcl3 | EtOHcl1 | EtOHcl2 | Galcl1 | YPDnc1 | YPDnc2 | YPDnc3 | YPDnc4 | EtOHnc1 | EtOHnc2 | Galnc1 | Galnc2 |
| 13 | MRM1   | YOR201C   | YPDcl2 | YPDcl3 | EtOHcl1 | EtOHcl2 | Galcl1 | YPDnc1 | YPDnc2 | YPDnc3 | YPDnc4 | EtOHnc1 | EtOHnc2 | Galnc1 | Galnc2 |
| 13 |        | YPR109W   | YPDcl2 | YPDcl3 | EtOHcl1 | EtOHcl2 | Galcl1 | YPDnc1 | YPDnc2 | YPDnc3 | YPDnc4 | EtOHnc1 | EtOHnc2 | Galnc1 | Galnc2 |
| 13 | NOT3   | YIL038C   | YPDcl2 | YPDcl3 | EtOHcl1 | EtOHcl2 | Galcl1 | YPDnc1 | YPDnc2 | YPDnc3 | YPDnc4 | EtOHnc1 | EtOHnc2 | Galnc1 | Galnc2 |
| 13 |        | YML082W   | YPDcl2 | YPDcl3 | EtOHcl1 | EtOHcl2 | Galcl1 | YPDnc1 | YPDnc2 | YPDnc3 | YPDnc4 | EtOHnc1 | EtOHnc2 | Galnc1 | Galnc2 |
| 13 | AIM42  | YOR286W   | YPDcl2 | YPDcl3 | EtOHcl1 | EtOHcl2 | Galcl1 | YPDnc1 | YPDnc2 | YPDnc3 | YPDnc4 | EtOHnc1 | EtOHnc2 | Galnc1 | Galnc2 |
| 13 |        | YOR218C   | YPDcl2 | YPDcl3 | EtOHcl1 | EtOHcl2 | Galcl1 | YPDnc1 | YPDnc2 | YPDnc3 | YPDnc4 | EtOHnc1 | EtOHnc2 | Galnc1 | Galnc2 |
| 13 |        | YNL010W   | YPDcl2 | YPDcl3 | EtOHcl1 | EtOHcl2 | Galcl1 | YPDnc1 | YPDnc2 | YPDnc3 | YPDnc4 | EtOHnc1 | EtOHnc2 | Galnc1 | Galnc2 |
| 13 |        | YJL070C   | YPDcl2 | YPDcl3 | EtOHcl1 | EtOHcl2 | Galcl1 | YPDnc1 | YPDnc2 | YPDnc3 | YPDnc4 | EtOHnc1 | EtOHnc2 | Galnc1 | Galnc2 |
| 13 | SKG1   | YKR100C   | YPDcl2 | YPDcl3 | EtOHcl1 | EtOHcl2 | Galcl1 | YPDnc1 | YPDnc2 | YPDnc3 | YPDnc4 | EtOHnc1 | EtOHnc2 | Galnc1 | Galnc2 |
| 13 | RPS29A | YLR388W   | YPDcl2 | YPDcl3 | EtOHcl1 | EtOHcl2 | Galcl1 | YPDnc1 | YPDnc2 | YPDnc3 | YPDnc4 | EtOHnc1 | EtOHnc2 | Galnc1 | Galnc2 |
| 13 | TPM1   | YNL079C   | YPDcl2 | YPDcl3 | EtOHcl1 | EtOHcl2 | Galcl1 | YPDnc1 | YPDnc2 | YPDnc3 | YPDnc4 | EtOHnc1 | EtOHnc2 | Galnc1 | Galnc2 |
| 13 | GIC1   | YHR061C   | YPDcl2 | YPDcl3 | EtOHcl1 | EtOHcl2 | Galcl1 | YPDnc1 | YPDnc2 | YPDnc3 | YPDnc4 | EtOHnc1 | EtOHnc2 | Galnc1 | Galnc2 |
| 13 | GRE3   | YHR104W   | YPDcl2 | YPDcl3 | EtOHcl1 | EtOHcl2 | Galcl1 | YPDnc1 | YPDnc2 | YPDnc3 | YPDnc4 | EtOHnc1 | EtOHnc2 | Galnc1 | Galnc2 |
| 13 | DRS1   | YLL008W   | YPDcl2 | YPDcl3 | EtOHcl1 | EtOHcl2 | Galcl1 | YPDnc1 | YPDnc2 | YPDnc3 | YPDnc4 | EtOHnc1 | EtOHnc2 | Galnc1 | Galnc2 |
| 13 | CAR1   | YPL111W   | YPDcl2 | YPDcl3 | EtOHcl1 | EtOHcl2 | Galcl1 | YPDnc1 | YPDnc2 | YPDnc3 | YPDnc4 | EtOHnc1 | EtOHnc2 | Galnc1 | Galnc2 |
| 13 | AMN1   | YBR158W   | YPDcl2 | YPDcl3 | EtOHcl1 | EtOHcl2 | Galcl1 | YPDnc1 | YPDnc2 | YPDnc3 | YPDnc4 | EtOHnc1 | EtOHnc2 | Galnc1 | Galnc2 |
| 13 | RRT6   | YGL146C   | YPDcl2 | YPDcl3 | EtOHcl1 | EtOHcl2 | Galcl1 | YPDnc1 | YPDnc2 | YPDnc3 | YPDnc4 | EtOHnc1 | EtOHnc2 | Galnc1 | Galnc2 |
| 13 | STV1   | YMR054W   | YPDcl2 | YPDcl3 | EtOHcl1 | EtOHcl2 | Galcl1 | YPDnc1 | YPDnc2 | YPDnc3 | YPDnc4 | EtOHnc1 | EtOHnc2 | Galnc1 | Galnc2 |
| 13 | CHO1   | YER026C   | YPDcl2 | YPDcl3 | EtOHcl1 | EtOHcl2 | Galcl1 | YPDnc1 | YPDnc2 | YPDnc3 | YPDnc4 | EtOHnc1 | EtOHnc2 | Galnc1 | Galnc2 |
| 13 | AKR1   | YDR264C   | YPDcl2 | YPDcl3 | EtOHcl1 | EtOHcl2 | Galcl1 | YPDnc1 | YPDnc2 | YPDnc3 | YPDnc4 | EtOHnc1 | EtOHnc2 | Galnc1 | Galnc2 |
| 13 | PEP5   | YMR231W   | YPDcl2 | YPDcl3 | EtOHcl1 | EtOHcl2 | Galcl1 | YPDnc1 | YPDnc2 | YPDnc3 | YPDnc4 | EtOHnc1 | EtOHnc2 | Galnc1 | Galnc2 |



|    |       |           |        |        |         |         |        |        |        |        |        |         |         |        |        |
|----|-------|-----------|--------|--------|---------|---------|--------|--------|--------|--------|--------|---------|---------|--------|--------|
| 13 | SCM3  | YDL139C   | YPDcl2 | YPDcl3 | EtOHcl1 | EtOHcl2 | Galcl1 | YPDnc1 | YPDnc2 | YPDnc3 | YPDnc4 | EtOHnc1 | EtOHnc2 | Galnc1 | Galnc2 |
| 13 | YAP7  | YOL028C   | YPDcl2 | YPDcl3 | EtOHcl1 | EtOHcl2 | Galcl1 | YPDnc1 | YPDnc2 | YPDnc3 | YPDnc4 | EtOHnc1 | EtOHnc2 | Galnc1 | Galnc2 |
| 13 | DBR1  | YKL149C   | YPDcl2 | YPDcl3 | EtOHcl1 | EtOHcl2 | Galcl1 | YPDnc1 | YPDnc2 | YPDnc3 | YPDnc4 | EtOHnc1 | EtOHnc2 | Galnc1 | Galnc2 |
| 13 |       | YBR072C-A | YPDcl2 | YPDcl3 | EtOHcl1 | EtOHcl2 | Galcl1 | YPDnc1 | YPDnc2 | YPDnc3 | YPDnc4 | EtOHnc1 | EtOHnc2 | Galnc1 | Galnc2 |
| 13 | DSE1  | YER124C   | YPDcl2 | YPDcl3 | EtOHcl1 | EtOHcl2 | Galcl1 | YPDnc1 | YPDnc2 | YPDnc3 | YPDnc4 | EtOHnc1 | EtOHnc2 | Galnc1 | Galnc2 |
| 13 |       | YBR209W   | YPDcl2 | YPDcl3 | EtOHcl1 | EtOHcl2 | Galcl1 | YPDnc1 | YPDnc2 | YPDnc3 | YPDnc4 | EtOHnc1 | EtOHnc2 | Galnc1 | Galnc2 |
| 13 | PST1  | YDR055W   | YPDcl2 | YPDcl3 | EtOHcl1 | EtOHcl2 | Galcl1 | YPDnc1 | YPDnc2 | YPDnc3 | YPDnc4 | EtOHnc1 | EtOHnc2 | Galnc1 | Galnc2 |
| 13 | SGS1  | YMR190C   | YPDcl2 | YPDcl3 | EtOHcl1 | EtOHcl2 | Galcl1 | YPDnc1 | YPDnc2 | YPDnc3 | YPDnc4 | EtOHnc1 | EtOHnc2 | Galnc1 | Galnc2 |
| 13 | TMA17 | YDL110C   | YPDcl2 | YPDcl3 | EtOHcl1 | EtOHcl2 | Galcl1 | YPDnc1 | YPDnc2 | YPDnc3 | YPDnc4 | EtOHnc1 | EtOHnc2 | Galnc1 | Galnc2 |
| 13 | GOR1  | YNL274C   | YPDcl2 | YPDcl3 | EtOHcl1 | EtOHcl2 | Galcl1 | YPDnc1 | YPDnc2 | YPDnc3 | YPDnc4 | EtOHnc1 | EtOHnc2 | Galnc1 | Galnc2 |
| 13 |       | YMR027W   | YPDcl2 | YPDcl3 | EtOHcl1 | EtOHcl2 | Galcl1 | YPDnc1 | YPDnc2 | YPDnc3 | YPDnc4 | EtOHnc1 | EtOHnc2 | Galnc1 | Galnc2 |
| 13 |       | YGR051C   | YPDcl2 | YPDcl3 | EtOHcl1 | EtOHcl2 | Galcl1 | YPDnc1 | YPDnc2 | YPDnc3 | YPDnc4 | EtOHnc1 | EtOHnc2 | Galnc1 | Galnc2 |
| 13 | CPR7  | YJR032W   | YPDcl2 | YPDcl3 | EtOHcl1 | EtOHcl2 | Galcl1 | YPDnc1 | YPDnc2 | YPDnc3 | YPDnc4 | EtOHnc1 | EtOHnc2 | Galnc1 | Galnc2 |
| 13 | AGE2  | YIL044C   | YPDcl2 | YPDcl3 | EtOHcl1 | EtOHcl2 | Galcl1 | YPDnc1 | YPDnc2 | YPDnc3 | YPDnc4 | EtOHnc1 | EtOHnc2 | Galnc1 | Galnc2 |
| 13 |       | YJL211C   | YPDcl2 | YPDcl3 | EtOHcl1 | EtOHcl2 | Galcl1 | YPDnc1 | YPDnc2 | YPDnc3 | YPDnc4 | EtOHnc1 | EtOHnc2 | Galnc1 | Galnc2 |
| 13 | IPP1  | YBR011C   | YPDcl2 | YPDcl3 | EtOHcl1 | EtOHcl2 | Galcl1 | YPDnc1 | YPDnc2 | YPDnc3 | YPDnc4 | EtOHnc1 | EtOHnc2 | Galnc1 | Galnc2 |
| 13 | RAD30 | YDR419W   | YPDcl2 | YPDcl3 | EtOHcl1 | EtOHcl2 | Galcl1 | YPDnc1 | YPDnc2 | YPDnc3 | YPDnc4 | EtOHnc1 | EtOHnc2 | Galnc1 | Galnc2 |
| 13 | ALG1  | YBR110W   | YPDcl2 | YPDcl3 | EtOHcl1 | EtOHcl2 | Galcl1 | YPDnc1 | YPDnc2 | YPDnc3 | YPDnc4 | EtOHnc1 | EtOHnc2 | Galnc1 | Galnc2 |
| 13 | TIR4  | YOR009W   | YPDcl2 | YPDcl3 | EtOHcl1 | EtOHcl2 | Galcl1 | YPDnc1 | YPDnc2 | YPDnc3 | YPDnc4 | EtOHnc1 | EtOHnc2 | Galnc1 | Galnc2 |
| 13 |       | YEL028W   | YPDcl2 | YPDcl3 | EtOHcl1 | EtOHcl2 | Galcl1 | YPDnc1 | YPDnc2 | YPDnc3 | YPDnc4 | EtOHnc1 | EtOHnc2 | Galnc1 | Galnc2 |
| 13 | NNF2  | YGR089W   | YPDcl2 | YPDcl3 | EtOHcl1 | EtOHcl2 | Galcl1 | YPDnc1 | YPDnc2 | YPDnc3 | YPDnc4 | EtOHnc1 | EtOHnc2 | Galnc1 | Galnc2 |
| 13 | IRC20 | YLR247C   | YPDcl2 | YPDcl3 | EtOHcl1 | EtOHcl2 | Galcl1 | YPDnc1 | YPDnc2 | YPDnc3 | YPDnc4 | EtOHnc1 | EtOHnc2 | Galnc1 | Galnc2 |
| 13 |       | YDR266C   | YPDcl2 | YPDcl3 | EtOHcl1 | EtOHcl2 | Galcl1 | YPDnc1 | YPDnc2 | YPDnc3 | YPDnc4 | EtOHnc1 | EtOHnc2 | Galnc1 | Galnc2 |
| 13 | RKM1  | YPL208W   | YPDcl2 | YPDcl3 | EtOHcl1 | EtOHcl2 | Galcl1 | YPDnc1 | YPDnc2 | YPDnc3 | YPDnc4 | EtOHnc1 | EtOHnc2 | Galnc1 | Galnc2 |
| 13 | HMG2  | YLR450W   | YPDcl2 | YPDcl3 | EtOHcl1 | EtOHcl2 | Galcl1 | YPDnc1 | YPDnc2 | YPDnc3 | YPDnc4 | EtOHnc1 | EtOHnc2 | Galnc1 | Galnc2 |
| 13 | HSH49 | YOR319W   | YPDcl2 | YPDcl3 | EtOHcl1 | EtOHcl2 | Galcl1 | YPDnc1 | YPDnc2 | YPDnc3 | YPDnc4 | EtOHnc1 | EtOHnc2 | Galnc1 | Galnc2 |
| 13 | GAL80 | YML051W   | YPDcl2 | YPDcl3 | EtOHcl1 | EtOHcl2 | Galcl1 | YPDnc1 | YPDnc2 | YPDnc3 | YPDnc4 | EtOHnc1 | EtOHnc2 | Galnc1 | Galnc2 |
| 13 |       | YGL117W   | YPDcl2 | YPDcl3 | EtOHcl1 | EtOHcl2 | Galcl1 | YPDnc1 | YPDnc2 | YPDnc3 | YPDnc4 | EtOHnc1 | EtOHnc2 | Galnc1 | Galnc2 |
| 13 | AUA1  | YFL010W-A | YPDcl2 | YPDcl3 | EtOHcl1 | EtOHcl2 | Galcl1 | YPDnc1 | YPDnc2 | YPDnc3 | YPDnc4 | EtOHnc1 | EtOHnc2 | Galnc1 | Galnc2 |
| 13 | PSF2  | YJL072C   | YPDcl2 | YPDcl3 | EtOHcl1 | EtOHcl2 | Galcl1 | YPDnc1 | YPDnc2 | YPDnc3 | YPDnc4 | EtOHnc1 | EtOHnc2 | Galnc1 | Galnc2 |
| 13 | LRP1  | YHR081W   | YPDcl2 | YPDcl3 | EtOHcl1 | EtOHcl2 | Galcl1 | YPDnc1 | YPDnc2 | YPDnc3 | YPDnc4 | EtOHnc1 | EtOHnc2 | Galnc1 | Galnc2 |
| 13 | CKA2  | YOR061W   | YPDcl2 | YPDcl3 | EtOHcl1 | EtOHcl2 | Galcl1 | YPDnc1 | YPDnc2 | YPDnc3 | YPDnc4 | EtOHnc1 | EtOHnc2 | Galnc1 | Galnc2 |
| 13 |       | YDR090C   | YPDcl2 | YPDcl3 | EtOHcl1 | EtOHcl2 | Galcl1 | YPDnc1 | YPDnc2 | YPDnc3 | YPDnc4 | EtOHnc1 | EtOHnc2 | Galnc1 | Galnc2 |
| 13 | CLN2  | YPL256C   | YPDcl2 | YPDcl3 | EtOHcl1 | EtOHcl2 | Galcl1 | YPDnc1 | YPDnc2 | YPDnc3 | YPDnc4 | EtOHnc1 | EtOHnc2 | Galnc1 | Galnc2 |

|    |        |         |        |        |         |         |        |        |        |        |        |         |         |        |        |
|----|--------|---------|--------|--------|---------|---------|--------|--------|--------|--------|--------|---------|---------|--------|--------|
| 13 | GYP1   | YOR070C | YPDcl2 | YPDcl3 | EtOHcl1 | EtOHcl2 | Galcl1 | YPDnc1 | YPDnc2 | YPDnc3 | YPDnc4 | EtOHnc1 | EtOHnc2 | Galnc1 | Galnc2 |
| 13 |        | YNL024C | YPDcl2 | YPDcl3 | EtOHcl1 | EtOHcl2 | Galcl1 | YPDnc1 | YPDnc2 | YPDnc3 | YPDnc4 | EtOHnc1 | EtOHnc2 | Galnc1 | Galnc2 |
| 13 | ENA1   | YDR040C | YPDcl2 | YPDcl3 | EtOHcl1 | EtOHcl2 | Galcl1 | YPDnc1 | YPDnc2 | YPDnc3 | YPDnc4 | EtOHnc1 | EtOHnc2 | Galnc1 | Galnc2 |
| 13 | AFG2   | YLR397C | YPDcl2 | YPDcl3 | EtOHcl1 | EtOHcl2 | Galcl1 | YPDnc1 | YPDnc2 | YPDnc3 | YPDnc4 | EtOHnc1 | EtOHnc2 | Galnc1 | Galnc2 |
| 13 | SPC105 | YGL093W | YPDcl2 | YPDcl3 | EtOHcl1 | EtOHcl2 | Galcl1 | YPDnc1 | YPDnc2 | YPDnc3 | YPDnc4 | EtOHnc1 | EtOHnc2 | Galnc1 | Galnc2 |
| 13 |        | YHL017W | YPDcl2 | YPDcl3 | EtOHcl1 | EtOHcl2 | Galcl1 | YPDnc1 | YPDnc2 | YPDnc3 | YPDnc4 | EtOHnc1 | EtOHnc2 | Galnc1 | Galnc2 |
| 13 | DED1   | YOR204W | YPDcl2 | YPDcl3 | EtOHcl1 | EtOHcl2 | Galcl1 | YPDnc1 | YPDnc2 | YPDnc3 | YPDnc4 | EtOHnc1 | EtOHnc2 | Galnc1 | Galnc2 |
| 13 |        | YMR046W | YPDcl2 | YPDcl3 | EtOHcl1 | EtOHcl2 | Galcl1 | YPDnc1 | YPDnc2 | YPDnc3 | YPDnc4 | EtOHnc1 | EtOHnc2 | Galnc1 | Galnc2 |
| 13 | GPD2   | YOL059W | YPDcl2 | YPDcl3 | EtOHcl1 | EtOHcl2 | Galcl1 | YPDnc1 | YPDnc2 | YPDnc3 | YPDnc4 | EtOHnc1 | EtOHnc2 | Galnc1 | Galnc2 |
| 13 | CLP1   | YOR250C | YPDcl2 | YPDcl3 | EtOHcl1 | EtOHcl2 | Galcl1 | YPDnc1 | YPDnc2 | YPDnc3 | YPDnc4 | EtOHnc1 | EtOHnc2 | Galnc1 | Galnc2 |
| 13 | CLD1   | YGR110W | YPDcl2 | YPDcl3 | EtOHcl1 | EtOHcl2 | Galcl1 | YPDnc1 | YPDnc2 | YPDnc3 | YPDnc4 | EtOHnc1 | EtOHnc2 | Galnc1 | Galnc2 |
| 13 | MUP3   | YHL036W | YPDcl2 | YPDcl3 | EtOHcl1 | EtOHcl2 | Galcl1 | YPDnc1 | YPDnc2 | YPDnc3 | YPDnc4 | EtOHnc1 | EtOHnc2 | Galnc1 | Galnc2 |
| 13 | SEY1   | YOR165W | YPDcl2 | YPDcl3 | EtOHcl1 | EtOHcl2 | Galcl1 | YPDnc1 | YPDnc2 | YPDnc3 | YPDnc4 | EtOHnc1 | EtOHnc2 | Galnc1 | Galnc2 |
| 13 | EMC2   | YJR088C | YPDcl2 | YPDcl3 | EtOHcl1 | EtOHcl2 | Galcl1 | YPDnc1 | YPDnc2 | YPDnc3 | YPDnc4 | EtOHnc1 | EtOHnc2 | Galnc1 | Galnc2 |
| 13 | RNA1   | YMR235C | YPDcl2 | YPDcl3 | EtOHcl1 | EtOHcl2 | Galcl1 | YPDnc1 | YPDnc2 | YPDnc3 | YPDnc4 | EtOHnc1 | EtOHnc2 | Galnc1 | Galnc2 |
| 13 | LSG1   | YGL099W | YPDcl2 | YPDcl3 | EtOHcl1 | EtOHcl2 | Galcl1 | YPDnc1 | YPDnc2 | YPDnc3 | YPDnc4 | EtOHnc1 | EtOHnc2 | Galnc1 | Galnc2 |
| 13 |        | YJR039W | YPDcl2 | YPDcl3 | EtOHcl1 | EtOHcl2 | Galcl1 | YPDnc1 | YPDnc2 | YPDnc3 | YPDnc4 | EtOHnc1 | EtOHnc2 | Galnc1 | Galnc2 |
| 13 | RPA34  | YJL148W | YPDcl2 | YPDcl3 | EtOHcl1 | EtOHcl2 | Galcl1 | YPDnc1 | YPDnc2 | YPDnc3 | YPDnc4 | EtOHnc1 | EtOHnc2 | Galnc1 | Galnc2 |
| 13 | UBX4   | YMR067C | YPDcl2 | YPDcl3 | EtOHcl1 | EtOHcl2 | Galcl1 | YPDnc1 | YPDnc2 | YPDnc3 | YPDnc4 | EtOHnc1 | EtOHnc2 | Galnc1 | Galnc2 |
| 13 | ALO1   | YML086C | YPDcl2 | YPDcl3 | EtOHcl1 | EtOHcl2 | Galcl1 | YPDnc1 | YPDnc2 | YPDnc3 | YPDnc4 | EtOHnc1 | EtOHnc2 | Galnc1 | Galnc2 |
| 13 | MLH1   | YMR167W | YPDcl2 | YPDcl3 | EtOHcl1 | EtOHcl2 | Galcl1 | YPDnc1 | YPDnc2 | YPDnc3 | YPDnc4 | EtOHnc1 | EtOHnc2 | Galnc1 | Galnc2 |
| 13 | DAD1   | YDR016C | YPDcl2 | YPDcl3 | EtOHcl1 | EtOHcl2 | Galcl1 | YPDnc1 | YPDnc2 | YPDnc3 | YPDnc4 | EtOHnc1 | EtOHnc2 | Galnc1 | Galnc2 |
| 13 | PFY1   | YOR122C | YPDcl2 | YPDcl3 | EtOHcl1 | EtOHcl2 | Galcl1 | YPDnc1 | YPDnc2 | YPDnc3 | YPDnc4 | EtOHnc1 | EtOHnc2 | Galnc1 | Galnc2 |
| 13 | SDP1   | YIL113W | YPDcl2 | YPDcl3 | EtOHcl1 | EtOHcl2 | Galcl1 | YPDnc1 | YPDnc2 | YPDnc3 | YPDnc4 | EtOHnc1 | EtOHnc2 | Galnc1 | Galnc2 |
| 13 |        | YNL234W | YPDcl2 | YPDcl3 | EtOHcl1 | EtOHcl2 | Galcl1 | YPDnc1 | YPDnc2 | YPDnc3 | YPDnc4 | EtOHnc1 | EtOHnc2 | Galnc1 | Galnc2 |
| 13 | PTR2   | YKR093W | YPDcl2 | YPDcl3 | EtOHcl1 | EtOHcl2 | Galcl1 | YPDnc1 | YPDnc2 | YPDnc3 | YPDnc4 | EtOHnc1 | EtOHnc2 | Galnc1 | Galnc2 |
| 13 | RSA4   | YCR072C | YPDcl2 | YPDcl3 | EtOHcl1 | EtOHcl2 | Galcl1 | YPDnc1 | YPDnc2 | YPDnc3 | YPDnc4 | EtOHnc1 | EtOHnc2 | Galnc1 | Galnc2 |
| 13 | ERD1   | YDR414C | YPDcl2 | YPDcl3 | EtOHcl1 | EtOHcl2 | Galcl1 | YPDnc1 | YPDnc2 | YPDnc3 | YPDnc4 | EtOHnc1 | EtOHnc2 | Galnc1 | Galnc2 |
| 13 | TMN3   | YER113C | YPDcl2 | YPDcl3 | EtOHcl1 | EtOHcl2 | Galcl1 | YPDnc1 | YPDnc2 | YPDnc3 | YPDnc4 | EtOHnc1 | EtOHnc2 | Galnc1 | Galnc2 |
| 13 | RDR1   | YOR380W | YPDcl2 | YPDcl3 | EtOHcl1 | EtOHcl2 | Galcl1 | YPDnc1 | YPDnc2 | YPDnc3 | YPDnc4 | EtOHnc1 | EtOHnc2 | Galnc1 | Galnc2 |
| 13 | MSC7   | YHR039C | YPDcl2 | YPDcl3 | EtOHcl1 | EtOHcl2 | Galcl1 | YPDnc1 | YPDnc2 | YPDnc3 | YPDnc4 | EtOHnc1 | EtOHnc2 | Galnc1 | Galnc2 |
| 13 | OTU1   | YFL044C | YPDcl2 | YPDcl3 | EtOHcl1 | EtOHcl2 | Galcl1 | YPDnc1 | YPDnc2 | YPDnc3 | YPDnc4 | EtOHnc1 | EtOHnc2 | Galnc1 | Galnc2 |
| 13 | FAA3   | YIL009W | YPDcl2 | YPDcl3 | EtOHcl1 | EtOHcl2 | Galcl1 | YPDnc1 | YPDnc2 | YPDnc3 | YPDnc4 | EtOHnc1 | EtOHnc2 | Galnc1 | Galnc2 |
| 13 | ISW1   | YBR245C | YPDcl2 | YPDcl3 | EtOHcl1 | EtOHcl2 | Galcl1 | YPDnc1 | YPDnc2 | YPDnc3 | YPDnc4 | EtOHnc1 | EtOHnc2 | Galnc1 | Galnc2 |

|           |           |        |        |         |         |        |        |        |        |        |         |         |        |        |
|-----------|-----------|--------|--------|---------|---------|--------|--------|--------|--------|--------|---------|---------|--------|--------|
| 13        | YNL046W   | YPDcl2 | YPDcl3 | EtOHcl1 | EtOHcl2 | Galcl1 | YPDnc1 | YPDnc2 | YPDnc3 | YPDnc4 | EtOHnc1 | EtOHnc2 | Galnc1 | Galnc2 |
| 13 MCM21  | YDR318W   | YPDcl2 | YPDcl3 | EtOHcl1 | EtOHcl2 | Galcl1 | YPDnc1 | YPDnc2 | YPDnc3 | YPDnc4 | EtOHnc1 | EtOHnc2 | Galnc1 | Galnc2 |
| 13 DIP5   | YPL265W   | YPDcl2 | YPDcl3 | EtOHcl1 | EtOHcl2 | Galcl1 | YPDnc1 | YPDnc2 | YPDnc3 | YPDnc4 | EtOHnc1 | EtOHnc2 | Galnc1 | Galnc2 |
| 13        | YGL152C   | YPDcl2 | YPDcl3 | EtOHcl1 | EtOHcl2 | Galcl1 | YPDnc1 | YPDnc2 | YPDnc3 | YPDnc4 | EtOHnc1 | EtOHnc2 | Galnc1 | Galnc2 |
| 13 YNG2   | YHR090C   | YPDcl2 | YPDcl3 | EtOHcl1 | EtOHcl2 | Galcl1 | YPDnc1 | YPDnc2 | YPDnc3 | YPDnc4 | EtOHnc1 | EtOHnc2 | Galnc1 | Galnc2 |
| 13        | YLR184W   | YPDcl2 | YPDcl3 | EtOHcl1 | EtOHcl2 | Galcl1 | YPDnc1 | YPDnc2 | YPDnc3 | YPDnc4 | EtOHnc1 | EtOHnc2 | Galnc1 | Galnc2 |
| 13 JID1   | YPR061C   | YPDcl2 | YPDcl3 | EtOHcl1 | EtOHcl2 | Galcl1 | YPDnc1 | YPDnc2 | YPDnc3 | YPDnc4 | EtOHnc1 | EtOHnc2 | Galnc1 | Galnc2 |
| 13 MSH2   | YOL090W   | YPDcl2 | YPDcl3 | EtOHcl1 | EtOHcl2 | Galcl1 | YPDnc1 | YPDnc2 | YPDnc3 | YPDnc4 | EtOHnc1 | EtOHnc2 | Galnc1 | Galnc2 |
| 13 TYS1   | YGR185C   | YPDcl2 | YPDcl3 | EtOHcl1 | EtOHcl2 | Galcl1 | YPDnc1 | YPDnc2 | YPDnc3 | YPDnc4 | EtOHnc1 | EtOHnc2 | Galnc1 | Galnc2 |
| 13        | YIL020C-A | YPDcl2 | YPDcl3 | EtOHcl1 | EtOHcl2 | Galcl1 | YPDnc1 | YPDnc2 | YPDnc3 | YPDnc4 | EtOHnc1 | EtOHnc2 | Galnc1 | Galnc2 |
| 13 AIM32  | YML050W   | YPDcl2 | YPDcl3 | EtOHcl1 | EtOHcl2 | Galcl1 | YPDnc1 | YPDnc2 | YPDnc3 | YPDnc4 | EtOHnc1 | EtOHnc2 | Galnc1 | Galnc2 |
| 13 VPS65  | YLR322W   | YPDcl2 | YPDcl3 | EtOHcl1 | EtOHcl2 | Galcl1 | YPDnc1 | YPDnc2 | YPDnc3 | YPDnc4 | EtOHnc1 | EtOHnc2 | Galnc1 | Galnc2 |
| 13        | YDR034W-  | YPDcl2 | YPDcl3 | EtOHcl1 | EtOHcl2 | Galcl1 | YPDnc1 | YPDnc2 | YPDnc3 | YPDnc4 | EtOHnc1 | EtOHnc2 | Galnc1 | Galnc2 |
| 13 NIS1   | YNL078W   | YPDcl2 | YPDcl3 | EtOHcl1 | EtOHcl2 | Galcl1 | YPDnc1 | YPDnc2 | YPDnc3 | YPDnc4 | EtOHnc1 | EtOHnc2 | Galnc1 | Galnc2 |
| 13        | YLR349W   | YPDcl2 | YPDcl3 | EtOHcl1 | EtOHcl2 | Galcl1 | YPDnc1 | YPDnc2 | YPDnc3 | YPDnc4 | EtOHnc1 | EtOHnc2 | Galnc1 | Galnc2 |
| 13        | YKR018C   | YPDcl2 | YPDcl3 | EtOHcl1 | EtOHcl2 | Galcl1 | YPDnc1 | YPDnc2 | YPDnc3 | YPDnc4 | EtOHnc1 | EtOHnc2 | Galnc1 | Galnc2 |
| 13 COS3   | YML132W   | YPDcl2 | YPDcl3 | EtOHcl1 | EtOHcl2 | Galcl1 | YPDnc1 | YPDnc2 | YPDnc3 | YPDnc4 | EtOHnc1 | EtOHnc2 | Galnc1 | Galnc2 |
| 13 YSC84  | YHR016C   | YPDcl2 | YPDcl3 | EtOHcl1 | EtOHcl2 | Galcl1 | YPDnc1 | YPDnc2 | YPDnc3 | YPDnc4 | EtOHnc1 | EtOHnc2 | Galnc1 | Galnc2 |
| 13 VTC2   | YFL004W   | YPDcl2 | YPDcl3 | EtOHcl1 | EtOHcl2 | Galcl1 | YPDnc1 | YPDnc2 | YPDnc3 | YPDnc4 | EtOHnc1 | EtOHnc2 | Galnc1 | Galnc2 |
| 13 RFC3   | YNL290W   | YPDcl2 | YPDcl3 | EtOHcl1 | EtOHcl2 | Galcl1 | YPDnc1 | YPDnc2 | YPDnc3 | YPDnc4 | EtOHnc1 | EtOHnc2 | Galnc1 | Galnc2 |
| 13 HHT1   | YBR010W   | YPDcl2 | YPDcl3 | EtOHcl1 | EtOHcl2 | Galcl1 | YPDnc1 | YPDnc2 | YPDnc3 | YPDnc4 | EtOHnc1 | EtOHnc2 | Galnc1 | Galnc2 |
| 13 LCL3   | YGL085W   | YPDcl2 | YPDcl3 | EtOHcl1 | EtOHcl2 | Galcl1 | YPDnc1 | YPDnc2 | YPDnc3 | YPDnc4 | EtOHnc1 | EtOHnc2 | Galnc1 | Galnc2 |
| 13 ENT2   | YLR206W   | YPDcl2 | YPDcl3 | EtOHcl1 | EtOHcl2 | Galcl1 | YPDnc1 | YPDnc2 | YPDnc3 | YPDnc4 | EtOHnc1 | EtOHnc2 | Galnc1 | Galnc2 |
| 13 TGL4   | YKR089C   | YPDcl2 | YPDcl3 | EtOHcl1 | EtOHcl2 | Galcl1 | YPDnc1 | YPDnc2 | YPDnc3 | YPDnc4 | EtOHnc1 | EtOHnc2 | Galnc1 | Galnc2 |
| 13        | YGL088W   | YPDcl2 | YPDcl3 | EtOHcl1 | EtOHcl2 | Galcl1 | YPDnc1 | YPDnc2 | YPDnc3 | YPDnc4 | EtOHnc1 | EtOHnc2 | Galnc1 | Galnc2 |
| 13 SNF11  | YDR073W   | YPDcl2 | YPDcl3 | EtOHcl1 | EtOHcl2 | Galcl1 | YPDnc1 | YPDnc2 | YPDnc3 | YPDnc4 | EtOHnc1 | EtOHnc2 | Galnc1 | Galnc2 |
| 13 DCI1   | YOR180C   | YPDcl2 | YPDcl3 | EtOHcl1 | EtOHcl2 | Galcl1 | YPDnc1 | YPDnc2 | YPDnc3 | YPDnc4 | EtOHnc1 | EtOHnc2 | Galnc1 | Galnc2 |
| 13 FLC3   | YGL139W   | YPDcl2 | YPDcl3 | EtOHcl1 | EtOHcl2 | Galcl1 | YPDnc1 | YPDnc2 | YPDnc3 | YPDnc4 | EtOHnc1 | EtOHnc2 | Galnc1 | Galnc2 |
| 13        | YAL044W-  | YPDcl2 | YPDcl3 | EtOHcl1 | EtOHcl2 | Galcl1 | YPDnc1 | YPDnc2 | YPDnc3 | YPDnc4 | EtOHnc1 | EtOHnc2 | Galnc1 | Galnc2 |
| 13        | YGL140C   | YPDcl2 | YPDcl3 | EtOHcl1 | EtOHcl2 | Galcl1 | YPDnc1 | YPDnc2 | YPDnc3 | YPDnc4 | EtOHnc1 | EtOHnc2 | Galnc1 | Galnc2 |
| 13 RNR4   | YGR180C   | YPDcl2 | YPDcl3 | EtOHcl1 | EtOHcl2 | Galcl1 | YPDnc1 | YPDnc2 | YPDnc3 | YPDnc4 | EtOHnc1 | EtOHnc2 | Galnc1 | Galnc2 |
| 13 CTF19  | YPL018W   | YPDcl2 | YPDcl3 | EtOHcl1 | EtOHcl2 | Galcl1 | YPDnc1 | YPDnc2 | YPDnc3 | YPDnc4 | EtOHnc1 | EtOHnc2 | Galnc1 | Galnc2 |
| 13        | YPL229W   | YPDcl2 | YPDcl3 | EtOHcl1 | EtOHcl2 | Galcl1 | YPDnc1 | YPDnc2 | YPDnc3 | YPDnc4 | EtOHnc1 | EtOHnc2 | Galnc1 | Galnc2 |
| 13 PET100 | YDR079W   | YPDcl2 | YPDcl3 | EtOHcl1 | EtOHcl2 | Galcl1 | YPDnc1 | YPDnc2 | YPDnc3 | YPDnc4 | EtOHnc1 | EtOHnc2 | Galnc1 | Galnc2 |

|           |           |        |        |         |         |        |        |        |        |        |         |         |        |        |
|-----------|-----------|--------|--------|---------|---------|--------|--------|--------|--------|--------|---------|---------|--------|--------|
| 13 SHO1   | YER118C   | YPDcl2 | YPDcl3 | EtOHcl1 | EtOHcl2 | Galcl1 | YPDnc1 | YPDnc2 | YPDnc3 | YPDnc4 | EtOHnc1 | EtOHnc2 | Galnc1 | Galnc2 |
| 13 UBP13  | YBL067C   | YPDcl2 | YPDcl3 | EtOHcl1 | EtOHcl2 | Galcl1 | YPDnc1 | YPDnc2 | YPDnc3 | YPDnc4 | EtOHnc1 | EtOHnc2 | Galnc1 | Galnc2 |
| 13 RPL42A | YNL162W   | YPDcl2 | YPDcl3 | EtOHcl1 | EtOHcl2 | Galcl1 | YPDnc1 | YPDnc2 | YPDnc3 | YPDnc4 | EtOHnc1 | EtOHnc2 | Galnc1 | Galnc2 |
| 13 CMR2   | YOR093C   | YPDcl2 | YPDcl3 | EtOHcl1 | EtOHcl2 | Galcl1 | YPDnc1 | YPDnc2 | YPDnc3 | YPDnc4 | EtOHnc1 | EtOHnc2 | Galnc1 | Galnc2 |
| 13 RPC25  | YKL144C   | YPDcl2 | YPDcl3 | EtOHcl1 | EtOHcl2 | Galcl1 | YPDnc1 | YPDnc2 | YPDnc3 | YPDnc4 | EtOHnc1 | EtOHnc2 | Galnc1 | Galnc2 |
| 13 YCT1   | YLL055W   | YPDcl2 | YPDcl3 | EtOHcl1 | EtOHcl2 | Galcl1 | YPDnc1 | YPDnc2 | YPDnc3 | YPDnc4 | EtOHnc1 | EtOHnc2 | Galnc1 | Galnc2 |
| 13 AEP1   | YMR064W   | YPDcl2 | YPDcl3 | EtOHcl1 | EtOHcl2 | Galcl1 | YPDnc1 | YPDnc2 | YPDnc3 | YPDnc4 | EtOHnc1 | EtOHnc2 | Galnc1 | Galnc2 |
| 13 TIF11  | YMR260C   | YPDcl2 | YPDcl3 | EtOHcl1 | EtOHcl2 | Galcl1 | YPDnc1 | YPDnc2 | YPDnc3 | YPDnc4 | EtOHnc1 | EtOHnc2 | Galnc1 | Galnc2 |
| 13        | YOR060C   | YPDcl2 | YPDcl3 | EtOHcl1 | EtOHcl2 | Galcl1 | YPDnc1 | YPDnc2 | YPDnc3 | YPDnc4 | EtOHnc1 | EtOHnc2 | Galnc1 | Galnc2 |
| 13        | YNL024C-A | YPDcl2 | YPDcl3 | EtOHcl1 | EtOHcl2 | Galcl1 | YPDnc1 | YPDnc2 | YPDnc3 | YPDnc4 | EtOHnc1 | EtOHnc2 | Galnc1 | Galnc2 |
| 13        | YJR015W   | YPDcl2 | YPDcl3 | EtOHcl1 | EtOHcl2 | Galcl1 | YPDnc1 | YPDnc2 | YPDnc3 | YPDnc4 | EtOHnc1 | EtOHnc2 | Galnc1 | Galnc2 |
| 13 CTF8   | YHR191C   | YPDcl2 | YPDcl3 | EtOHcl1 | EtOHcl2 | Galcl1 | YPDnc1 | YPDnc2 | YPDnc3 | YPDnc4 | EtOHnc1 | EtOHnc2 | Galnc1 | Galnc2 |
| 13 UPS3   | YDR185C   | YPDcl2 | YPDcl3 | EtOHcl1 | EtOHcl2 | Galcl1 | YPDnc1 | YPDnc2 | YPDnc3 | YPDnc4 | EtOHnc1 | EtOHnc2 | Galnc1 | Galnc2 |
| 13 UGA3   | YDL170W   | YPDcl2 | YPDcl3 | EtOHcl1 | EtOHcl2 | Galcl1 | YPDnc1 | YPDnc2 | YPDnc3 | YPDnc4 | EtOHnc1 | EtOHnc2 | Galnc1 | Galnc2 |
| 13        | YEL073C   | YPDcl2 | YPDcl3 | EtOHcl1 | EtOHcl2 | Galcl1 | YPDnc1 | YPDnc2 | YPDnc3 | YPDnc4 | EtOHnc1 | EtOHnc2 | Galnc1 | Galnc2 |
| 13 TCB3   | YML072C   | YPDcl2 | YPDcl3 | EtOHcl1 | EtOHcl2 | Galcl1 | YPDnc1 | YPDnc2 | YPDnc3 | YPDnc4 | EtOHnc1 | EtOHnc2 | Galnc1 | Galnc2 |
| 13 CAX4   | YGR036C   | YPDcl2 | YPDcl3 | EtOHcl1 | EtOHcl2 | Galcl1 | YPDnc1 | YPDnc2 | YPDnc3 | YPDnc4 | EtOHnc1 | EtOHnc2 | Galnc1 | Galnc2 |
| 13 SSH1   | YBR283C   | YPDcl2 | YPDcl3 | EtOHcl1 | EtOHcl2 | Galcl1 | YPDnc1 | YPDnc2 | YPDnc3 | YPDnc4 | EtOHnc1 | EtOHnc2 | Galnc1 | Galnc2 |
| 13 MTC3   | YGL226W   | YPDcl2 | YPDcl3 | EtOHcl1 | EtOHcl2 | Galcl1 | YPDnc1 | YPDnc2 | YPDnc3 | YPDnc4 | EtOHnc1 | EtOHnc2 | Galnc1 | Galnc2 |
| 13        | YPR096C   | YPDcl2 | YPDcl3 | EtOHcl1 | EtOHcl2 | Galcl1 | YPDnc1 | YPDnc2 | YPDnc3 | YPDnc4 | EtOHnc1 | EtOHnc2 | Galnc1 | Galnc2 |
| 13 FYV8   | YGR196C   | YPDcl2 | YPDcl3 | EtOHcl1 | EtOHcl2 | Galcl1 | YPDnc1 | YPDnc2 | YPDnc3 | YPDnc4 | EtOHnc1 | EtOHnc2 | Galnc1 | Galnc2 |
| 13 RPS18A | YDR450W   | YPDcl2 | YPDcl3 | EtOHcl1 | EtOHcl2 | Galcl1 | YPDnc1 | YPDnc2 | YPDnc3 | YPDnc4 | EtOHnc1 | EtOHnc2 | Galnc1 | Galnc2 |
| 13 RPD3   | YNL330C   | YPDcl2 | YPDcl3 | EtOHcl1 | EtOHcl2 | Galcl1 | YPDnc1 | YPDnc2 | YPDnc3 | YPDnc4 | EtOHnc1 | EtOHnc2 | Galnc1 | Galnc2 |
| 13 PTH1   | YHR189W   | YPDcl2 | YPDcl3 | EtOHcl1 | EtOHcl2 | Galcl1 | YPDnc1 | YPDnc2 | YPDnc3 | YPDnc4 | EtOHnc1 | EtOHnc2 | Galnc1 | Galnc2 |
| 13        | YJR030C   | YPDcl2 | YPDcl3 | EtOHcl1 | EtOHcl2 | Galcl1 | YPDnc1 | YPDnc2 | YPDnc3 | YPDnc4 | EtOHnc1 | EtOHnc2 | Galnc1 | Galnc2 |
| 13 GRX2   | YDR513W   | YPDcl2 | YPDcl3 | EtOHcl1 | EtOHcl2 | Galcl1 | YPDnc1 | YPDnc2 | YPDnc3 | YPDnc4 | EtOHnc1 | EtOHnc2 | Galnc1 | Galnc2 |
| 13 PSD2   | YGR170W   | YPDcl2 | YPDcl3 | EtOHcl1 | EtOHcl2 | Galcl1 | YPDnc1 | YPDnc2 | YPDnc3 | YPDnc4 | EtOHnc1 | EtOHnc2 | Galnc1 | Galnc2 |
| 13 YDJ1   | YNL064C   | YPDcl2 | YPDcl3 | EtOHcl1 | EtOHcl2 | Galcl1 | YPDnc1 | YPDnc2 | YPDnc3 | YPDnc4 | EtOHnc1 | EtOHnc2 | Galnc1 | Galnc2 |
| 13 TRM7   | YBR061C   | YPDcl2 | YPDcl3 | EtOHcl1 | EtOHcl2 | Galcl1 | YPDnc1 | YPDnc2 | YPDnc3 | YPDnc4 | EtOHnc1 | EtOHnc2 | Galnc1 | Galnc2 |
| 13 TIR2   | YOR010C   | YPDcl2 | YPDcl3 | EtOHcl1 | EtOHcl2 | Galcl1 | YPDnc1 | YPDnc2 | YPDnc3 | YPDnc4 | EtOHnc1 | EtOHnc2 | Galnc1 | Galnc2 |
| 13 SNF8   | YPL002C   | YPDcl2 | YPDcl3 | EtOHcl1 | EtOHcl2 | Galcl1 | YPDnc1 | YPDnc2 | YPDnc3 | YPDnc4 | EtOHnc1 | EtOHnc2 | Galnc1 | Galnc2 |
| 13 RPL27A | YHR010W   | YPDcl2 | YPDcl3 | EtOHcl1 | EtOHcl2 | Galcl1 | YPDnc1 | YPDnc2 | YPDnc3 | YPDnc4 | EtOHnc1 | EtOHnc2 | Galnc1 | Galnc2 |
| 13 RPS8B  | YER102W   | YPDcl2 | YPDcl3 | EtOHcl1 | EtOHcl2 | Galcl1 | YPDnc1 | YPDnc2 | YPDnc3 | YPDnc4 | EtOHnc1 | EtOHnc2 | Galnc1 | Galnc2 |
| 13 MUD2   | YKL074C   | YPDcl2 | YPDcl3 | EtOHcl1 | EtOHcl2 | Galcl1 | YPDnc1 | YPDnc2 | YPDnc3 | YPDnc4 | EtOHnc1 | EtOHnc2 | Galnc1 | Galnc2 |

|          |         |        |        |         |         |        |        |        |        |        |         |         |        |        |
|----------|---------|--------|--------|---------|---------|--------|--------|--------|--------|--------|---------|---------|--------|--------|
| 13       | YKR023W | YPDcl2 | YPDcl3 | EtOHcl1 | EtOHcl2 | Galcl1 | YPDnc1 | YPDnc2 | YPDnc3 | YPDnc4 | EtOHnc1 | EtOHnc2 | Galnc1 | Galnc2 |
| 13 RBG1  | YAL036C | YPDcl2 | YPDcl3 | EtOHcl1 | EtOHcl2 | Galcl1 | YPDnc1 | YPDnc2 | YPDnc3 | YPDnc4 | EtOHnc1 | EtOHnc2 | Galnc1 | Galnc2 |
| 13 RRP14 | YKL082C | YPDcl2 | YPDcl3 | EtOHcl1 | EtOHcl2 | Galcl1 | YPDnc1 | YPDnc2 | YPDnc3 | YPDnc4 | EtOHnc1 | EtOHnc2 | Galnc1 | Galnc2 |
| 13 CDH1  | YGL003C | YPDcl2 | YPDcl3 | EtOHcl1 | EtOHcl2 | Galcl1 | YPDnc1 | YPDnc2 | YPDnc3 | YPDnc4 | EtOHnc1 | EtOHnc2 | Galnc1 | Galnc2 |
| 13       | YGR237C | YPDcl2 | YPDcl3 | EtOHcl1 | EtOHcl2 | Galcl1 | YPDnc1 | YPDnc2 | YPDnc3 | YPDnc4 | EtOHnc1 | EtOHnc2 | Galnc1 | Galnc2 |
| 13 FKH1  | YIL131C | YPDcl2 | YPDcl3 | EtOHcl1 | EtOHcl2 | Galcl1 | YPDnc1 | YPDnc2 | YPDnc3 | YPDnc4 | EtOHnc1 | EtOHnc2 | Galnc1 | Galnc2 |
| 13 DBF20 | YPR111W | YPDcl2 | YPDcl3 | EtOHcl1 | EtOHcl2 | Galcl1 | YPDnc1 | YPDnc2 | YPDnc3 | YPDnc4 | EtOHnc1 | EtOHnc2 | Galnc1 | Galnc2 |
| 13 INM2  | YDR287W | YPDcl2 | YPDcl3 | EtOHcl1 | EtOHcl2 | Galcl1 | YPDnc1 | YPDnc2 | YPDnc3 | YPDnc4 | EtOHnc1 | EtOHnc2 | Galnc1 | Galnc2 |
| 13 MIC17 | YMR002W | YPDcl2 | YPDcl3 | EtOHcl1 | EtOHcl2 | Galcl1 | YPDnc1 | YPDnc2 | YPDnc3 | YPDnc4 | EtOHnc1 | EtOHnc2 | Galnc1 | Galnc2 |
| 13 KIN1  | YDR122W | YPDcl2 | YPDcl3 | EtOHcl1 | EtOHcl2 | Galcl1 | YPDnc1 | YPDnc2 | YPDnc3 | YPDnc4 | EtOHnc1 | EtOHnc2 | Galnc1 | Galnc2 |
| 13 SRO77 | YBL106C | YPDcl2 | YPDcl3 | EtOHcl1 | EtOHcl2 | Galcl1 | YPDnc1 | YPDnc2 | YPDnc3 | YPDnc4 | EtOHnc1 | EtOHnc2 | Galnc1 | Galnc2 |
| 13 SHE4  | YOR035C | YPDcl2 | YPDcl3 | EtOHcl1 | EtOHcl2 | Galcl1 | YPDnc1 | YPDnc2 | YPDnc3 | YPDnc4 | EtOHnc1 | EtOHnc2 | Galnc1 | Galnc2 |
| 13 VPS64 | YDR200C | YPDcl2 | YPDcl3 | EtOHcl1 | EtOHcl2 | Galcl1 | YPDnc1 | YPDnc2 | YPDnc3 | YPDnc4 | EtOHnc1 | EtOHnc2 | Galnc1 | Galnc2 |
| 13 RRT14 | YIL127C | YPDcl2 | YPDcl3 | EtOHcl1 | EtOHcl2 | Galcl1 | YPDnc1 | YPDnc2 | YPDnc3 | YPDnc4 | EtOHnc1 | EtOHnc2 | Galnc1 | Galnc2 |
| 13 PRS4  | YBL068W | YPDcl2 | YPDcl3 | EtOHcl1 | EtOHcl2 | Galcl1 | YPDnc1 | YPDnc2 | YPDnc3 | YPDnc4 | EtOHnc1 | EtOHnc2 | Galnc1 | Galnc2 |
| 13 SEC8  | YPR055W | YPDcl2 | YPDcl3 | EtOHcl1 | EtOHcl2 | Galcl1 | YPDnc1 | YPDnc2 | YPDnc3 | YPDnc4 | EtOHnc1 | EtOHnc2 | Galnc1 | Galnc2 |
| 13 GPI12 | YMR281W | YPDcl2 | YPDcl3 | EtOHcl1 | EtOHcl2 | Galcl1 | YPDnc1 | YPDnc2 | YPDnc3 | YPDnc4 | EtOHnc1 | EtOHnc2 | Galnc1 | Galnc2 |
| 13 NTH2  | YBR001C | YPDcl2 | YPDcl3 | EtOHcl1 | EtOHcl2 | Galcl1 | YPDnc1 | YPDnc2 | YPDnc3 | YPDnc4 | EtOHnc1 | EtOHnc2 | Galnc1 | Galnc2 |
| 13 TRE2  | YOR256C | YPDcl2 | YPDcl3 | EtOHcl1 | EtOHcl2 | Galcl1 | YPDnc1 | YPDnc2 | YPDnc3 | YPDnc4 | EtOHnc1 | EtOHnc2 | Galnc1 | Galnc2 |
| 13 RTR1  | YER139C | YPDcl2 | YPDcl3 | EtOHcl1 | EtOHcl2 | Galcl1 | YPDnc1 | YPDnc2 | YPDnc3 | YPDnc4 | EtOHnc1 | EtOHnc2 | Galnc1 | Galnc2 |
| 13       | YNL174W | YPDcl2 | YPDcl3 | EtOHcl1 | EtOHcl2 | Galcl1 | YPDnc1 | YPDnc2 | YPDnc3 | YPDnc4 | EtOHnc1 | EtOHnc2 | Galnc1 | Galnc2 |
| 13 CDC28 | YBR160W | YPDcl2 | YPDcl3 | EtOHcl1 | EtOHcl2 | Galcl1 | YPDnc1 | YPDnc2 | YPDnc3 | YPDnc4 | EtOHnc1 | EtOHnc2 | Galnc1 | Galnc2 |
| 13 CCL1  | YPR025C | YPDcl2 | YPDcl3 | EtOHcl1 | EtOHcl2 | Galcl1 | YPDnc1 | YPDnc2 | YPDnc3 | YPDnc4 | EtOHnc1 | EtOHnc2 | Galnc1 | Galnc2 |
| 13 PAU18 | YLL064C | YPDcl2 | YPDcl3 | EtOHcl1 | EtOHcl2 | Galcl1 | YPDnc1 | YPDnc2 | YPDnc3 | YPDnc4 | EtOHnc1 | EtOHnc2 | Galnc1 | Galnc2 |
| 13 HRP1  | YOL123W | YPDcl2 | YPDcl3 | EtOHcl1 | EtOHcl2 | Galcl1 | YPDnc1 | YPDnc2 | YPDnc3 | YPDnc4 | EtOHnc1 | EtOHnc2 | Galnc1 | Galnc2 |
| 13 PAN2  | YGL094C | YPDcl2 | YPDcl3 | EtOHcl1 | EtOHcl2 | Galcl1 | YPDnc1 | YPDnc2 | YPDnc3 | YPDnc4 | EtOHnc1 | EtOHnc2 | Galnc1 | Galnc2 |
| 13 PDC2  | YDR081C | YPDcl2 | YPDcl3 | EtOHcl1 | EtOHcl2 | Galcl1 | YPDnc1 | YPDnc2 | YPDnc3 | YPDnc4 | EtOHnc1 | EtOHnc2 | Galnc1 | Galnc2 |
| 13 MNN5  | YJL186W | YPDcl2 | YPDcl3 | EtOHcl1 | EtOHcl2 | Galcl1 | YPDnc1 | YPDnc2 | YPDnc3 | YPDnc4 | EtOHnc1 | EtOHnc2 | Galnc1 | Galnc2 |
| 13       | YIL024C | YPDcl2 | YPDcl3 | EtOHcl1 | EtOHcl2 | Galcl1 | YPDnc1 | YPDnc2 | YPDnc3 | YPDnc4 | EtOHnc1 | EtOHnc2 | Galnc1 | Galnc2 |
| 13 CSN12 | YJR084W | YPDcl2 | YPDcl3 | EtOHcl1 | EtOHcl2 | Galcl1 | YPDnc1 | YPDnc2 | YPDnc3 | YPDnc4 | EtOHnc1 | EtOHnc2 | Galnc1 | Galnc2 |
| 13       | YMR087W | YPDcl2 | YPDcl3 | EtOHcl1 | EtOHcl2 | Galcl1 | YPDnc1 | YPDnc2 | YPDnc3 | YPDnc4 | EtOHnc1 | EtOHnc2 | Galnc1 | Galnc2 |
| 13 PSR2  | YLR019W | YPDcl2 | YPDcl3 | EtOHcl1 | EtOHcl2 | Galcl1 | YPDnc1 | YPDnc2 | YPDnc3 | YPDnc4 | EtOHnc1 | EtOHnc2 | Galnc1 | Galnc2 |
| 13 RSM18 | YER050C | YPDcl2 | YPDcl3 | EtOHcl1 | EtOHcl2 | Galcl1 | YPDnc1 | YPDnc2 | YPDnc3 | YPDnc4 | EtOHnc1 | EtOHnc2 | Galnc1 | Galnc2 |
| 13 SPR3  | YGR059W | YPDcl2 | YPDcl3 | EtOHcl1 | EtOHcl2 | Galcl1 | YPDnc1 | YPDnc2 | YPDnc3 | YPDnc4 | EtOHnc1 | EtOHnc2 | Galnc1 | Galnc2 |

|    |          |           |        |         |         |         |        |        |        |        |         |         |         |        |        |
|----|----------|-----------|--------|---------|---------|---------|--------|--------|--------|--------|---------|---------|---------|--------|--------|
| 13 | YER046W- | YPDcl2    | YPDcl3 | EtOHcl1 | EtOHcl2 | Galcl1  | YPDnc1 | YPDnc2 | YPDnc3 | YPDnc4 | EtOHnc1 | EtOHnc2 | Galnc1  | Galnc2 |        |
| 13 | PET309   | YLR067C   | YPDcl2 | YPDcl3  | EtOHcl1 | EtOHcl2 | Galcl1 | YPDnc1 | YPDnc2 | YPDnc3 | YPDnc4  | EtOHnc1 | EtOHnc2 | Galnc1 | Galnc2 |
| 13 | YMR082C  | YPDcl2    | YPDcl3 | EtOHcl1 | EtOHcl2 | Galcl1  | YPDnc1 | YPDnc2 | YPDnc3 | YPDnc4 | EtOHnc1 | EtOHnc2 | Galnc1  | Galnc2 |        |
| 13 | VMA5     | YKL080W   | YPDcl2 | YPDcl3  | EtOHcl1 | EtOHcl2 | Galcl1 | YPDnc1 | YPDnc2 | YPDnc3 | YPDnc4  | EtOHnc1 | EtOHnc2 | Galnc1 | Galnc2 |
| 13 | TMA108   | YIL137C   | YPDcl2 | YPDcl3  | EtOHcl1 | EtOHcl2 | Galcl1 | YPDnc1 | YPDnc2 | YPDnc3 | YPDnc4  | EtOHnc1 | EtOHnc2 | Galnc1 | Galnc2 |
| 13 | SSA3     | YBL075C   | YPDcl2 | YPDcl3  | EtOHcl1 | EtOHcl2 | Galcl1 | YPDnc1 | YPDnc2 | YPDnc3 | YPDnc4  | EtOHnc1 | EtOHnc2 | Galnc1 | Galnc2 |
| 13 | RAI1     | YGL246C   | YPDcl2 | YPDcl3  | EtOHcl1 | EtOHcl2 | Galcl1 | YPDnc1 | YPDnc2 | YPDnc3 | YPDnc4  | EtOHnc1 | EtOHnc2 | Galnc1 | Galnc2 |
| 13 | ISN1     | YOR155C   | YPDcl2 | YPDcl3  | EtOHcl1 | EtOHcl2 | Galcl1 | YPDnc1 | YPDnc2 | YPDnc3 | YPDnc4  | EtOHnc1 | EtOHnc2 | Galnc1 | Galnc2 |
| 13 | MRF1     | YGL143C   | YPDcl2 | YPDcl3  | EtOHcl1 | EtOHcl2 | Galcl1 | YPDnc1 | YPDnc2 | YPDnc3 | YPDnc4  | EtOHnc1 | EtOHnc2 | Galnc1 | Galnc2 |
| 13 | LAP3     | YNL239W   | YPDcl2 | YPDcl3  | EtOHcl1 | EtOHcl2 | Galcl1 | YPDnc1 | YPDnc2 | YPDnc3 | YPDnc4  | EtOHnc1 | EtOHnc2 | Galnc1 | Galnc2 |
| 13 |          | YNR073C   | YPDcl2 | YPDcl3  | EtOHcl1 | EtOHcl2 | Galcl1 | YPDnc1 | YPDnc2 | YPDnc3 | YPDnc4  | EtOHnc1 | EtOHnc2 | Galnc1 | Galnc2 |
| 13 | COX19    | YLL018C-A | YPDcl2 | YPDcl3  | EtOHcl1 | EtOHcl2 | Galcl1 | YPDnc1 | YPDnc2 | YPDnc3 | YPDnc4  | EtOHnc1 | EtOHnc2 | Galnc1 | Galnc2 |
| 13 | CYK3     | YDL117W   | YPDcl2 | YPDcl3  | EtOHcl1 | EtOHcl2 | Galcl1 | YPDnc1 | YPDnc2 | YPDnc3 | YPDnc4  | EtOHnc1 | EtOHnc2 | Galnc1 | Galnc2 |
| 13 |          | YOL075C   | YPDcl2 | YPDcl3  | EtOHcl1 | EtOHcl2 | Galcl1 | YPDnc1 | YPDnc2 | YPDnc3 | YPDnc4  | EtOHnc1 | EtOHnc2 | Galnc1 | Galnc2 |
| 13 | GPM3     | YOL056W   | YPDcl2 | YPDcl3  | EtOHcl1 | EtOHcl2 | Galcl1 | YPDnc1 | YPDnc2 | YPDnc3 | YPDnc4  | EtOHnc1 | EtOHnc2 | Galnc1 | Galnc2 |
| 13 |          | YCR045W-  | YPDcl2 | YPDcl3  | EtOHcl1 | EtOHcl2 | Galcl1 | YPDnc1 | YPDnc2 | YPDnc3 | YPDnc4  | EtOHnc1 | EtOHnc2 | Galnc1 | Galnc2 |
| 13 | TIM44    | YIL022W   | YPDcl2 | YPDcl3  | EtOHcl1 | EtOHcl2 | Galcl1 | YPDnc1 | YPDnc2 | YPDnc3 | YPDnc4  | EtOHnc1 | EtOHnc2 | Galnc1 | Galnc2 |
| 13 | IRC21    | YMR073C   | YPDcl2 | YPDcl3  | EtOHcl1 | EtOHcl2 | Galcl1 | YPDnc1 | YPDnc2 | YPDnc3 | YPDnc4  | EtOHnc1 | EtOHnc2 | Galnc1 | Galnc2 |
| 13 | RAD3     | YER171W   | YPDcl2 | YPDcl3  | EtOHcl1 | EtOHcl2 | Galcl1 | YPDnc1 | YPDnc2 | YPDnc3 | YPDnc4  | EtOHnc1 | EtOHnc2 | Galnc1 | Galnc2 |
| 13 | NUP1     | YOR098C   | YPDcl2 | YPDcl3  | EtOHcl1 | EtOHcl2 | Galcl1 | YPDnc1 | YPDnc2 | YPDnc3 | YPDnc4  | EtOHnc1 | EtOHnc2 | Galnc1 | Galnc2 |
| 13 | IRR1     | YIL026C   | YPDcl2 | YPDcl3  | EtOHcl1 | EtOHcl2 | Galcl1 | YPDnc1 | YPDnc2 | YPDnc3 | YPDnc4  | EtOHnc1 | EtOHnc2 | Galnc1 | Galnc2 |
| 13 | OCA6     | YDR067C   | YPDcl2 | YPDcl3  | EtOHcl1 | EtOHcl2 | Galcl1 | YPDnc1 | YPDnc2 | YPDnc3 | YPDnc4  | EtOHnc1 | EtOHnc2 | Galnc1 | Galnc2 |
| 13 | SEC9     | YGR009C   | YPDcl2 | YPDcl3  | EtOHcl1 | EtOHcl2 | Galcl1 | YPDnc1 | YPDnc2 | YPDnc3 | YPDnc4  | EtOHnc1 | EtOHnc2 | Galnc1 | Galnc2 |
| 13 |          | YJL175W   | YPDcl2 | YPDcl3  | EtOHcl1 | EtOHcl2 | Galcl1 | YPDnc1 | YPDnc2 | YPDnc3 | YPDnc4  | EtOHnc1 | EtOHnc2 | Galnc1 | Galnc2 |
| 13 |          | YGR204C-A | YPDcl2 | YPDcl3  | EtOHcl1 | EtOHcl2 | Galcl1 | YPDnc1 | YPDnc2 | YPDnc3 | YPDnc4  | EtOHnc1 | EtOHnc2 | Galnc1 | Galnc2 |
| 13 | PSP2     | YML017W   | YPDcl2 | YPDcl3  | EtOHcl1 | EtOHcl2 | Galcl1 | YPDnc1 | YPDnc2 | YPDnc3 | YPDnc4  | EtOHnc1 | EtOHnc2 | Galnc1 | Galnc2 |
| 13 | NAB2     | YGL122C   | YPDcl2 | YPDcl3  | EtOHcl1 | EtOHcl2 | Galcl1 | YPDnc1 | YPDnc2 | YPDnc3 | YPDnc4  | EtOHnc1 | EtOHnc2 | Galnc1 | Galnc2 |
| 13 | ECM16    | YMR128W   | YPDcl2 | YPDcl3  | EtOHcl1 | EtOHcl2 | Galcl1 | YPDnc1 | YPDnc2 | YPDnc3 | YPDnc4  | EtOHnc1 | EtOHnc2 | Galnc1 | Galnc2 |
| 13 | VAC8     | YEL013W   | YPDcl2 | YPDcl3  | EtOHcl1 | EtOHcl2 | Galcl1 | YPDnc1 | YPDnc2 | YPDnc3 | YPDnc4  | EtOHnc1 | EtOHnc2 | Galnc1 | Galnc2 |
| 13 | KAR5     | YMR065W   | YPDcl2 | YPDcl3  | EtOHcl1 | EtOHcl2 | Galcl1 | YPDnc1 | YPDnc2 | YPDnc3 | YPDnc4  | EtOHnc1 | EtOHnc2 | Galnc1 | Galnc2 |
| 13 |          | YIR020W-A | YPDcl2 | YPDcl3  | EtOHcl1 | EtOHcl2 | Galcl1 | YPDnc1 | YPDnc2 | YPDnc3 | YPDnc4  | EtOHnc1 | EtOHnc2 | Galnc1 | Galnc2 |
| 13 | SEC6     | YIL068C   | YPDcl2 | YPDcl3  | EtOHcl1 | EtOHcl2 | Galcl1 | YPDnc1 | YPDnc2 | YPDnc3 | YPDnc4  | EtOHnc1 | EtOHnc2 | Galnc1 | Galnc2 |
| 13 | DPM1     | YPR183W   | YPDcl2 | YPDcl3  | EtOHcl1 | EtOHcl2 | Galcl1 | YPDnc1 | YPDnc2 | YPDnc3 | YPDnc4  | EtOHnc1 | EtOHnc2 | Galnc1 | Galnc2 |
| 13 |          | YLR125W   | YPDcl2 | YPDcl3  | EtOHcl1 | EtOHcl2 | Galcl1 | YPDnc1 | YPDnc2 | YPDnc3 | YPDnc4  | EtOHnc1 | EtOHnc2 | Galnc1 | Galnc2 |

|           |           |        |        |         |         |        |        |        |        |        |         |         |        |        |
|-----------|-----------|--------|--------|---------|---------|--------|--------|--------|--------|--------|---------|---------|--------|--------|
| 13        | YOL024W   | YPDcl2 | YPDcl3 | EtOHcl1 | EtOHcl2 | Galcl1 | YPDnc1 | YPDnc2 | YPDnc3 | YPDnc4 | EtOHnc1 | EtOHnc2 | Galnc1 | Galnc2 |
| 13        | YGR012W   | YPDcl2 | YPDcl3 | EtOHcl1 | EtOHcl2 | Galcl1 | YPDnc1 | YPDnc2 | YPDnc3 | YPDnc4 | EtOHnc1 | EtOHnc2 | Galnc1 | Galnc2 |
| 13        | YNL095C   | YPDcl2 | YPDcl3 | EtOHcl1 | EtOHcl2 | Galcl1 | YPDnc1 | YPDnc2 | YPDnc3 | YPDnc4 | EtOHnc1 | EtOHnc2 | Galnc1 | Galnc2 |
| 13 BUD2   | YKL092C   | YPDcl2 | YPDcl3 | EtOHcl1 | EtOHcl2 | Galcl1 | YPDnc1 | YPDnc2 | YPDnc3 | YPDnc4 | EtOHnc1 | EtOHnc2 | Galnc1 | Galnc2 |
| 13 DSF2   | YBR007C   | YPDcl2 | YPDcl3 | EtOHcl1 | EtOHcl2 | Galcl1 | YPDnc1 | YPDnc2 | YPDnc3 | YPDnc4 | EtOHnc1 | EtOHnc2 | Galnc1 | Galnc2 |
| 13 NTG1   | YAL015C   | YPDcl2 | YPDcl3 | EtOHcl1 | EtOHcl2 | Galcl1 | YPDnc1 | YPDnc2 | YPDnc3 | YPDnc4 | EtOHnc1 | EtOHnc2 | Galnc1 | Galnc2 |
| 13 HXK2   | YGL253W   | YPDcl2 | YPDcl3 | EtOHcl1 | EtOHcl2 | Galcl1 | YPDnc1 | YPDnc2 | YPDnc3 | YPDnc4 | EtOHnc1 | EtOHnc2 | Galnc1 | Galnc2 |
| 13 LIP5   | YOR196C   | YPDcl2 | YPDcl3 | EtOHcl1 | EtOHcl2 | Galcl1 | YPDnc1 | YPDnc2 | YPDnc3 | YPDnc4 | EtOHnc1 | EtOHnc2 | Galnc1 | Galnc2 |
| 13 MDM20  | YOL076W   | YPDcl2 | YPDcl3 | EtOHcl1 | EtOHcl2 | Galcl1 | YPDnc1 | YPDnc2 | YPDnc3 | YPDnc4 | EtOHnc1 | EtOHnc2 | Galnc1 | Galnc2 |
| 13 RTN1   | YDR233C   | YPDcl2 | YPDcl3 | EtOHcl1 | EtOHcl2 | Galcl1 | YPDnc1 | YPDnc2 | YPDnc3 | YPDnc4 | EtOHnc1 | EtOHnc2 | Galnc1 | Galnc2 |
| 13        | YCR075W-  | YPDcl2 | YPDcl3 | EtOHcl1 | EtOHcl2 | Galcl1 | YPDnc1 | YPDnc2 | YPDnc3 | YPDnc4 | EtOHnc1 | EtOHnc2 | Galnc1 | Galnc2 |
| 13 UTR2   | YEL040W   | YPDcl2 | YPDcl3 | EtOHcl1 | EtOHcl2 | Galcl1 | YPDnc1 | YPDnc2 | YPDnc3 | YPDnc4 | EtOHnc1 | EtOHnc2 | Galnc1 | Galnc2 |
| 13        | YMR252C   | YPDcl2 | YPDcl3 | EtOHcl1 | EtOHcl2 | Galcl1 | YPDnc1 | YPDnc2 | YPDnc3 | YPDnc4 | EtOHnc1 | EtOHnc2 | Galnc1 | Galnc2 |
| 13 IME2   | YJL106W   | YPDcl2 | YPDcl3 | EtOHcl1 | EtOHcl2 | Galcl1 | YPDnc1 | YPDnc2 | YPDnc3 | YPDnc4 | EtOHnc1 | EtOHnc2 | Galnc1 | Galnc2 |
| 13 HYM1   | YKL189W   | YPDcl2 | YPDcl3 | EtOHcl1 | EtOHcl2 | Galcl1 | YPDnc1 | YPDnc2 | YPDnc3 | YPDnc4 | EtOHnc1 | EtOHnc2 | Galnc1 | Galnc2 |
| 13 MXR2   | YCL033C   | YPDcl2 | YPDcl3 | EtOHcl1 | EtOHcl2 | Galcl1 | YPDnc1 | YPDnc2 | YPDnc3 | YPDnc4 | EtOHnc1 | EtOHnc2 | Galnc1 | Galnc2 |
| 13        | YOR041C   | YPDcl2 | YPDcl3 | EtOHcl1 | EtOHcl2 | Galcl1 | YPDnc1 | YPDnc2 | YPDnc3 | YPDnc4 | EtOHnc1 | EtOHnc2 | Galnc1 | Galnc2 |
| 13 PRP18  | YGR006W   | YPDcl2 | YPDcl3 | EtOHcl1 | EtOHcl2 | Galcl1 | YPDnc1 | YPDnc2 | YPDnc3 | YPDnc4 | EtOHnc1 | EtOHnc2 | Galnc1 | Galnc2 |
| 13        | YPL041C   | YPDcl2 | YPDcl3 | EtOHcl1 | EtOHcl2 | Galcl1 | YPDnc1 | YPDnc2 | YPDnc3 | YPDnc4 | EtOHnc1 | EtOHnc2 | Galnc1 | Galnc2 |
| 13        | YOL131W   | YPDcl2 | YPDcl3 | EtOHcl1 | EtOHcl2 | Galcl1 | YPDnc1 | YPDnc2 | YPDnc3 | YPDnc4 | EtOHnc1 | EtOHnc2 | Galnc1 | Galnc2 |
| 13 PIR3   | YKL163W   | YPDcl2 | YPDcl3 | EtOHcl1 | EtOHcl2 | Galcl1 | YPDnc1 | YPDnc2 | YPDnc3 | YPDnc4 | EtOHnc1 | EtOHnc2 | Galnc1 | Galnc2 |
| 13 PTC6   | YCR079W   | YPDcl2 | YPDcl3 | EtOHcl1 | EtOHcl2 | Galcl1 | YPDnc1 | YPDnc2 | YPDnc3 | YPDnc4 | EtOHnc1 | EtOHnc2 | Galnc1 | Galnc2 |
| 13 MRPS18 | YNL306W   | YPDcl2 | YPDcl3 | EtOHcl1 | EtOHcl2 | Galcl1 | YPDnc1 | YPDnc2 | YPDnc3 | YPDnc4 | EtOHnc1 | EtOHnc2 | Galnc1 | Galnc2 |
| 13 HMT1   | YBR034C   | YPDcl2 | YPDcl3 | EtOHcl1 | EtOHcl2 | Galcl1 | YPDnc1 | YPDnc2 | YPDnc3 | YPDnc4 | EtOHnc1 | EtOHnc2 | Galnc1 | Galnc2 |
| 13 SLT2   | YHR030C   | YPDcl2 | YPDcl3 | EtOHcl1 | EtOHcl2 | Galcl1 | YPDnc1 | YPDnc2 | YPDnc3 | YPDnc4 | EtOHnc1 | EtOHnc2 | Galnc1 | Galnc2 |
| 13 ASN2   | YGR124W   | YPDcl2 | YPDcl3 | EtOHcl1 | EtOHcl2 | Galcl1 | YPDnc1 | YPDnc2 | YPDnc3 | YPDnc4 | EtOHnc1 | EtOHnc2 | Galnc1 | Galnc2 |
| 13 RPS14A | YCR031C   | YPDcl2 | YPDcl3 | EtOHcl1 | EtOHcl2 | Galcl1 | YPDnc1 | YPDnc2 | YPDnc3 | YPDnc4 | EtOHnc1 | EtOHnc2 | Galnc1 | Galnc2 |
| 13 DDP1   | YOR163W   | YPDcl2 | YPDcl3 | EtOHcl1 | EtOHcl2 | Galcl1 | YPDnc1 | YPDnc2 | YPDnc3 | YPDnc4 | EtOHnc1 | EtOHnc2 | Galnc1 | Galnc2 |
| 13 ATG27  | YJL178C   | YPDcl2 | YPDcl3 | EtOHcl1 | EtOHcl2 | Galcl1 | YPDnc1 | YPDnc2 | YPDnc3 | YPDnc4 | EtOHnc1 | EtOHnc2 | Galnc1 | Galnc2 |
| 13        | YOR051C   | YPDcl2 | YPDcl3 | EtOHcl1 | EtOHcl2 | Galcl1 | YPDnc1 | YPDnc2 | YPDnc3 | YPDnc4 | EtOHnc1 | EtOHnc2 | Galnc1 | Galnc2 |
| 13        | YLR352W   | YPDcl2 | YPDcl3 | EtOHcl1 | EtOHcl2 | Galcl1 | YPDnc1 | YPDnc2 | YPDnc3 | YPDnc4 | EtOHnc1 | EtOHnc2 | Galnc1 | Galnc2 |
| 13        | YKL018C-A | YPDcl2 | YPDcl3 | EtOHcl1 | EtOHcl2 | Galcl1 | YPDnc1 | YPDnc2 | YPDnc3 | YPDnc4 | EtOHnc1 | EtOHnc2 | Galnc1 | Galnc2 |
| 13 MRD1   | YPR112C   | YPDcl2 | YPDcl3 | EtOHcl1 | EtOHcl2 | Galcl1 | YPDnc1 | YPDnc2 | YPDnc3 | YPDnc4 | EtOHnc1 | EtOHnc2 | Galnc1 | Galnc2 |
| 13        | YDR354C-A | YPDcl2 | YPDcl3 | EtOHcl1 | EtOHcl2 | Galcl1 | YPDnc1 | YPDnc2 | YPDnc3 | YPDnc4 | EtOHnc1 | EtOHnc2 | Galnc1 | Galnc2 |

|          |           |        |        |         |         |        |        |        |        |        |         |         |        |        |
|----------|-----------|--------|--------|---------|---------|--------|--------|--------|--------|--------|---------|---------|--------|--------|
| 13 DBP6  | YNR038W   | YPDcl2 | YPDcl3 | EtOHcl1 | EtOHcl2 | Galcl1 | YPDnc1 | YPDnc2 | YPDnc3 | YPDnc4 | EtOHnc1 | EtOHnc2 | Galnc1 | Galnc2 |
| 13 SEC24 | YIL109C   | YPDcl2 | YPDcl3 | EtOHcl1 | EtOHcl2 | Galcl1 | YPDnc1 | YPDnc2 | YPDnc3 | YPDnc4 | EtOHnc1 | EtOHnc2 | Galnc1 | Galnc2 |
| 13 MNT2  | YGL257C   | YPDcl2 | YPDcl3 | EtOHcl1 | EtOHcl2 | Galcl1 | YPDnc1 | YPDnc2 | YPDnc3 | YPDnc4 | EtOHnc1 | EtOHnc2 | Galnc1 | Galnc2 |
| 13 PRS2  | YER099C   | YPDcl2 | YPDcl3 | EtOHcl1 | EtOHcl2 | Galcl1 | YPDnc1 | YPDnc2 | YPDnc3 | YPDnc4 | EtOHnc1 | EtOHnc2 | Galnc1 | Galnc2 |
| 13 IPI3  | YNL182C   | YPDcl2 | YPDcl3 | EtOHcl1 | EtOHcl2 | Galcl1 | YPDnc1 | YPDnc2 | YPDnc3 | YPDnc4 | EtOHnc1 | EtOHnc2 | Galnc1 | Galnc2 |
| 13 TIF3  | YPR163C   | YPDcl2 | YPDcl3 | EtOHcl1 | EtOHcl2 | Galcl1 | YPDnc1 | YPDnc2 | YPDnc3 | YPDnc4 | EtOHnc1 | EtOHnc2 | Galnc1 | Galnc2 |
| 13 CAT2  | YML042W   | YPDcl2 | YPDcl3 | EtOHcl1 | EtOHcl2 | Galcl1 | YPDnc1 | YPDnc2 | YPDnc3 | YPDnc4 | EtOHnc1 | EtOHnc2 | Galnc1 | Galnc2 |
| 13 RSR1  | YGR152C   | YPDcl2 | YPDcl3 | EtOHcl1 | EtOHcl2 | Galcl1 | YPDnc1 | YPDnc2 | YPDnc3 | YPDnc4 | EtOHnc1 | EtOHnc2 | Galnc1 | Galnc2 |
| 13 SEC7  | YDR170C   | YPDcl2 | YPDcl3 | EtOHcl1 | EtOHcl2 | Galcl1 | YPDnc1 | YPDnc2 | YPDnc3 | YPDnc4 | EtOHnc1 | EtOHnc2 | Galnc1 | Galnc2 |
| 13 TPM2  | YIL138C   | YPDcl2 | YPDcl3 | EtOHcl1 | EtOHcl2 | Galcl1 | YPDnc1 | YPDnc2 | YPDnc3 | YPDnc4 | EtOHnc1 | EtOHnc2 | Galnc1 | Galnc2 |
| 13 MSW1  | YDR268W   | YPDcl2 | YPDcl3 | EtOHcl1 | EtOHcl2 | Galcl1 | YPDnc1 | YPDnc2 | YPDnc3 | YPDnc4 | EtOHnc1 | EtOHnc2 | Galnc1 | Galnc2 |
| 13 MET22 | YOL064C   | YPDcl2 | YPDcl3 | EtOHcl1 | EtOHcl2 | Galcl1 | YPDnc1 | YPDnc2 | YPDnc3 | YPDnc4 | EtOHnc1 | EtOHnc2 | Galnc1 | Galnc2 |
| 13 IGO2  | YHR132W-  | YPDcl2 | YPDcl3 | EtOHcl1 | EtOHcl2 | Galcl1 | YPDnc1 | YPDnc2 | YPDnc3 | YPDnc4 | EtOHnc1 | EtOHnc2 | Galnc1 | Galnc2 |
| 13       | YJL197C-A | YPDcl2 | YPDcl3 | EtOHcl1 | EtOHcl2 | Galcl1 | YPDnc1 | YPDnc2 | YPDnc3 | YPDnc4 | EtOHnc1 | EtOHnc2 | Galnc1 | Galnc2 |
| 13 HUA2  | YOR284W   | YPDcl2 | YPDcl3 | EtOHcl1 | EtOHcl2 | Galcl1 | YPDnc1 | YPDnc2 | YPDnc3 | YPDnc4 | EtOHnc1 | EtOHnc2 | Galnc1 | Galnc2 |
| 13 SME1  | YOR159C   | YPDcl2 | YPDcl3 | EtOHcl1 | EtOHcl2 | Galcl1 | YPDnc1 | YPDnc2 | YPDnc3 | YPDnc4 | EtOHnc1 | EtOHnc2 | Galnc1 | Galnc2 |
| 13 ATP16 | YDL004W   | YPDcl2 | YPDcl3 | EtOHcl1 | EtOHcl2 | Galcl1 | YPDnc1 | YPDnc2 | YPDnc3 | YPDnc4 | EtOHnc1 | EtOHnc2 | Galnc1 | Galnc2 |
| 13 MSB1  | YOR188W   | YPDcl2 | YPDcl3 | EtOHcl1 | EtOHcl2 | Galcl1 | YPDnc1 | YPDnc2 | YPDnc3 | YPDnc4 | EtOHnc1 | EtOHnc2 | Galnc1 | Galnc2 |
| 13 DID4  | YKL002W   | YPDcl2 | YPDcl3 | EtOHcl1 | EtOHcl2 | Galcl1 | YPDnc1 | YPDnc2 | YPDnc3 | YPDnc4 | EtOHnc1 | EtOHnc2 | Galnc1 | Galnc2 |
| 13 TPK1  | YJL164C   | YPDcl2 | YPDcl3 | EtOHcl1 | EtOHcl2 | Galcl1 | YPDnc1 | YPDnc2 | YPDnc3 | YPDnc4 | EtOHnc1 | EtOHnc2 | Galnc1 | Galnc2 |
| 13 UBC6  | YER100W   | YPDcl2 | YPDcl3 | EtOHcl1 | EtOHcl2 | Galcl1 | YPDnc1 | YPDnc2 | YPDnc3 | YPDnc4 | EtOHnc1 | EtOHnc2 | Galnc1 | Galnc2 |
| 13 HFD1  | YMR110C   | YPDcl2 | YPDcl3 | EtOHcl1 | EtOHcl2 | Galcl1 | YPDnc1 | YPDnc2 | YPDnc3 | YPDnc4 | EtOHnc1 | EtOHnc2 | Galnc1 | Galnc2 |
| 13 PCF11 | YDR228C   | YPDcl2 | YPDcl3 | EtOHcl1 | EtOHcl2 | Galcl1 | YPDnc1 | YPDnc2 | YPDnc3 | YPDnc4 | EtOHnc1 | EtOHnc2 | Galnc1 | Galnc2 |
| 13 EMP47 | YFL048C   | YPDcl2 | YPDcl3 | EtOHcl1 | EtOHcl2 | Galcl1 | YPDnc1 | YPDnc2 | YPDnc3 | YPDnc4 | EtOHnc1 | EtOHnc2 | Galnc1 | Galnc2 |
| 13       | YPR117W   | YPDcl2 | YPDcl3 | EtOHcl1 | EtOHcl2 | Galcl1 | YPDnc1 | YPDnc2 | YPDnc3 | YPDnc4 | EtOHnc1 | EtOHnc2 | Galnc1 | Galnc2 |
| 13 ENP1  | YBR247C   | YPDcl2 | YPDcl3 | EtOHcl1 | EtOHcl2 | Galcl1 | YPDnc1 | YPDnc2 | YPDnc3 | YPDnc4 | EtOHnc1 | EtOHnc2 | Galnc1 | Galnc2 |
| 13 UBR2  | YLR024C   | YPDcl2 | YPDcl3 | EtOHcl1 | EtOHcl2 | Galcl1 | YPDnc1 | YPDnc2 | YPDnc3 | YPDnc4 | EtOHnc1 | EtOHnc2 | Galnc1 | Galnc2 |
| 13 SWD2  | YKL018W   | YPDcl2 | YPDcl3 | EtOHcl1 | EtOHcl2 | Galcl1 | YPDnc1 | YPDnc2 | YPDnc3 | YPDnc4 | EtOHnc1 | EtOHnc2 | Galnc1 | Galnc2 |
| 13 GCN3  | YKR026C   | YPDcl2 | YPDcl3 | EtOHcl1 | EtOHcl2 | Galcl1 | YPDnc1 | YPDnc2 | YPDnc3 | YPDnc4 | EtOHnc1 | EtOHnc2 | Galnc1 | Galnc2 |
| 13 SSA2  | YLL024C   | YPDcl2 | YPDcl3 | EtOHcl1 | EtOHcl2 | Galcl1 | YPDnc1 | YPDnc2 | YPDnc3 | YPDnc4 | EtOHnc1 | EtOHnc2 | Galnc1 | Galnc2 |
| 13 SAC3  | YDR159W   | YPDcl2 | YPDcl3 | EtOHcl1 | EtOHcl2 | Galcl1 | YPDnc1 | YPDnc2 | YPDnc3 | YPDnc4 | EtOHnc1 | EtOHnc2 | Galnc1 | Galnc2 |
| 13 NTO1  | YPR031W   | YPDcl2 | YPDcl3 | EtOHcl1 | EtOHcl2 | Galcl1 | YPDnc1 | YPDnc2 | YPDnc3 | YPDnc4 | EtOHnc1 | EtOHnc2 | Galnc1 | Galnc2 |
| 13 GLO4  | YOR040W   | YPDcl2 | YPDcl3 | EtOHcl1 | EtOHcl2 | Galcl1 | YPDnc1 | YPDnc2 | YPDnc3 | YPDnc4 | EtOHnc1 | EtOHnc2 | Galnc1 | Galnc2 |
| 13 COX4  | YGL187C   | YPDcl2 | YPDcl3 | EtOHcl1 | EtOHcl2 | Galcl1 | YPDnc1 | YPDnc2 | YPDnc3 | YPDnc4 | EtOHnc1 | EtOHnc2 | Galnc1 | Galnc2 |



|          |           |        |        |         |         |        |        |        |        |        |         |         |        |        |
|----------|-----------|--------|--------|---------|---------|--------|--------|--------|--------|--------|---------|---------|--------|--------|
| 13 PEP7  | YDR323C   | YPDcl2 | YPDcl3 | EtOHcl1 | EtOHcl2 | Galcl1 | YPDnc1 | YPDnc2 | YPDnc3 | YPDnc4 | EtOHnc1 | EtOHnc2 | Galnc1 | Galnc2 |
| 13 SFC1  | YJR095W   | YPDcl2 | YPDcl3 | EtOHcl1 | EtOHcl2 | Galcl1 | YPDnc1 | YPDnc2 | YPDnc3 | YPDnc4 | EtOHnc1 | EtOHnc2 | Galnc1 | Galnc2 |
| 13 VPS72 | YDR485C   | YPDcl2 | YPDcl3 | EtOHcl1 | EtOHcl2 | Galcl1 | YPDnc1 | YPDnc2 | YPDnc3 | YPDnc4 | EtOHnc1 | EtOHnc2 | Galnc1 | Galnc2 |
| 13 KTR5  | YNL029C   | YPDcl2 | YPDcl3 | EtOHcl1 | EtOHcl2 | Galcl1 | YPDnc1 | YPDnc2 | YPDnc3 | YPDnc4 | EtOHnc1 | EtOHnc2 | Galnc1 | Galnc2 |
| 13 MAD3  | YJL013C   | YPDcl2 | YPDcl3 | EtOHcl1 | EtOHcl2 | Galcl1 | YPDnc1 | YPDnc2 | YPDnc3 | YPDnc4 | EtOHnc1 | EtOHnc2 | Galnc1 | Galnc2 |
| 13       | YGR011W   | YPDcl2 | YPDcl3 | EtOHcl1 | EtOHcl2 | Galcl1 | YPDnc1 | YPDnc2 | YPDnc3 | YPDnc4 | EtOHnc1 | EtOHnc2 | Galnc1 | Galnc2 |
| 13 EAF7  | YNL136W   | YPDcl2 | YPDcl3 | EtOHcl1 | EtOHcl2 | Galcl1 | YPDnc1 | YPDnc2 | YPDnc3 | YPDnc4 | EtOHnc1 | EtOHnc2 | Galnc1 | Galnc2 |
| 13 JLP1  | YLL057C   | YPDcl2 | YPDcl3 | EtOHcl1 | EtOHcl2 | Galcl1 | YPDnc1 | YPDnc2 | YPDnc3 | YPDnc4 | EtOHnc1 | EtOHnc2 | Galnc1 | Galnc2 |
| 13 USO1  | YDL058W   | YPDcl2 | YPDcl3 | EtOHcl1 | EtOHcl2 | Galcl1 | YPDnc1 | YPDnc2 | YPDnc3 | YPDnc4 | EtOHnc1 | EtOHnc2 | Galnc1 | Galnc2 |
| 13 PTH2  | YBL057C   | YPDcl2 | YPDcl3 | EtOHcl1 | EtOHcl2 | Galcl1 | YPDnc1 | YPDnc2 | YPDnc3 | YPDnc4 | EtOHnc1 | EtOHnc2 | Galnc1 | Galnc2 |
| 13       | YER064C   | YPDcl2 | YPDcl3 | EtOHcl1 | EtOHcl2 | Galcl1 | YPDnc1 | YPDnc2 | YPDnc3 | YPDnc4 | EtOHnc1 | EtOHnc2 | Galnc1 | Galnc2 |
| 13 CEG1  | YGL130W   | YPDcl2 | YPDcl3 | EtOHcl1 | EtOHcl2 | Galcl1 | YPDnc1 | YPDnc2 | YPDnc3 | YPDnc4 | EtOHnc1 | EtOHnc2 | Galnc1 | Galnc2 |
| 13 PCA1  | YBR295W   | YPDcl2 | YPDcl3 | EtOHcl1 | EtOHcl2 | Galcl1 | YPDnc1 | YPDnc2 | YPDnc3 | YPDnc4 | EtOHnc1 | EtOHnc2 | Galnc1 | Galnc2 |
| 13 PRP16 | YKR086W   | YPDcl2 | YPDcl3 | EtOHcl1 | EtOHcl2 | Galcl1 | YPDnc1 | YPDnc2 | YPDnc3 | YPDnc4 | EtOHnc1 | EtOHnc2 | Galnc1 | Galnc2 |
| 13 CTI6  | YPL181W   | YPDcl2 | YPDcl3 | EtOHcl1 | EtOHcl2 | Galcl1 | YPDnc1 | YPDnc2 | YPDnc3 | YPDnc4 | EtOHnc1 | EtOHnc2 | Galnc1 | Galnc2 |
| 13 UFE1  | YOR075W   | YPDcl2 | YPDcl3 | EtOHcl1 | EtOHcl2 | Galcl1 | YPDnc1 | YPDnc2 | YPDnc3 | YPDnc4 | EtOHnc1 | EtOHnc2 | Galnc1 | Galnc2 |
| 13 ATG16 | YMR159C   | YPDcl2 | YPDcl3 | EtOHcl1 | EtOHcl2 | Galcl1 | YPDnc1 | YPDnc2 | YPDnc3 | YPDnc4 | EtOHnc1 | EtOHnc2 | Galnc1 | Galnc2 |
| 13 GUP1  | YGL084C   | YPDcl2 | YPDcl3 | EtOHcl1 | EtOHcl2 | Galcl1 | YPDnc1 | YPDnc2 | YPDnc3 | YPDnc4 | EtOHnc1 | EtOHnc2 | Galnc1 | Galnc2 |
| 13       | YDR541C   | YPDcl2 | YPDcl3 | EtOHcl1 | EtOHcl2 | Galcl1 | YPDnc1 | YPDnc2 | YPDnc3 | YPDnc4 | EtOHnc1 | EtOHnc2 | Galnc1 | Galnc2 |
| 13       | YPL245W   | YPDcl2 | YPDcl3 | EtOHcl1 | EtOHcl2 | Galcl1 | YPDnc1 | YPDnc2 | YPDnc3 | YPDnc4 | EtOHnc1 | EtOHnc2 | Galnc1 | Galnc2 |
| 13 XRS2  | YDR369C   | YPDcl2 | YPDcl3 | EtOHcl1 | EtOHcl2 | Galcl1 | YPDnc1 | YPDnc2 | YPDnc3 | YPDnc4 | EtOHnc1 | EtOHnc2 | Galnc1 | Galnc2 |
| 13 GSH2  | YOL049W   | YPDcl2 | YPDcl3 | EtOHcl1 | EtOHcl2 | Galcl1 | YPDnc1 | YPDnc2 | YPDnc3 | YPDnc4 | EtOHnc1 | EtOHnc2 | Galnc1 | Galnc2 |
| 13       | YJR140W-A | YPDcl2 | YPDcl3 | EtOHcl1 | EtOHcl2 | Galcl1 | YPDnc1 | YPDnc2 | YPDnc3 | YPDnc4 | EtOHnc1 | EtOHnc2 | Galnc1 | Galnc2 |
| 13 VBA1  | YMR088C   | YPDcl2 | YPDcl3 | EtOHcl1 | EtOHcl2 | Galcl1 | YPDnc1 | YPDnc2 | YPDnc3 | YPDnc4 | EtOHnc1 | EtOHnc2 | Galnc1 | Galnc2 |
| 13 VPS55 | YJR044C   | YPDcl2 | YPDcl3 | EtOHcl1 | EtOHcl2 | Galcl1 | YPDnc1 | YPDnc2 | YPDnc3 | YPDnc4 | EtOHnc1 | EtOHnc2 | Galnc1 | Galnc2 |
| 13 PPZ2  | YDR436W   | YPDcl2 | YPDcl3 | EtOHcl1 | EtOHcl2 | Galcl1 | YPDnc1 | YPDnc2 | YPDnc3 | YPDnc4 | EtOHnc1 | EtOHnc2 | Galnc1 | Galnc2 |
| 13 CAB2  | YIL083C   | YPDcl2 | YPDcl3 | EtOHcl1 | EtOHcl2 | Galcl1 | YPDnc1 | YPDnc2 | YPDnc3 | YPDnc4 | EtOHnc1 | EtOHnc2 | Galnc1 | Galnc2 |
| 13 UBP2  | YOR124C   | YPDcl2 | YPDcl3 | EtOHcl1 | EtOHcl2 | Galcl1 | YPDnc1 | YPDnc2 | YPDnc3 | YPDnc4 | EtOHnc1 | EtOHnc2 | Galnc1 | Galnc2 |
| 13 NSG1  | YHR133C   | YPDcl2 | YPDcl3 | EtOHcl1 | EtOHcl2 | Galcl1 | YPDnc1 | YPDnc2 | YPDnc3 | YPDnc4 | EtOHnc1 | EtOHnc2 | Galnc1 | Galnc2 |
| 13       | YDR230W   | YPDcl2 | YPDcl3 | EtOHcl1 | EtOHcl2 | Galcl1 | YPDnc1 | YPDnc2 | YPDnc3 | YPDnc4 | EtOHnc1 | EtOHnc2 | Galnc1 | Galnc2 |
| 13       | YIL058W   | YPDcl2 | YPDcl3 | EtOHcl1 | EtOHcl2 | Galcl1 | YPDnc1 | YPDnc2 | YPDnc3 | YPDnc4 | EtOHnc1 | EtOHnc2 | Galnc1 | Galnc2 |
| 13 GSM1  | YJL103C   | YPDcl2 | YPDcl3 | EtOHcl1 | EtOHcl2 | Galcl1 | YPDnc1 | YPDnc2 | YPDnc3 | YPDnc4 | EtOHnc1 | EtOHnc2 | Galnc1 | Galnc2 |
| 13 COG5  | YNL051W   | YPDcl2 | YPDcl3 | EtOHcl1 | EtOHcl2 | Galcl1 | YPDnc1 | YPDnc2 | YPDnc3 | YPDnc4 | EtOHnc1 | EtOHnc2 | Galnc1 | Galnc2 |
| 13 VPS9  | YML097C   | YPDcl2 | YPDcl3 | EtOHcl1 | EtOHcl2 | Galcl1 | YPDnc1 | YPDnc2 | YPDnc3 | YPDnc4 | EtOHnc1 | EtOHnc2 | Galnc1 | Galnc2 |

|    |        |           |        |        |         |         |        |        |        |        |        |         |         |        |        |
|----|--------|-----------|--------|--------|---------|---------|--------|--------|--------|--------|--------|---------|---------|--------|--------|
| 13 | SLN1   | YIL147C   | YPDcl2 | YPDcl3 | EtOHcl1 | EtOHcl2 | Galcl1 | YPDnc1 | YPDnc2 | YPDnc3 | YPDnc4 | EtOHnc1 | EtOHnc2 | Galnc1 | Galnc2 |
| 13 | ARP5   | YNL059C   | YPDcl2 | YPDcl3 | EtOHcl1 | EtOHcl2 | Galcl1 | YPDnc1 | YPDnc2 | YPDnc3 | YPDnc4 | EtOHnc1 | EtOHnc2 | Galnc1 | Galnc2 |
| 13 | ZIP2   | YGL249W   | YPDcl2 | YPDcl3 | EtOHcl1 | EtOHcl2 | Galcl1 | YPDnc1 | YPDnc2 | YPDnc3 | YPDnc4 | EtOHnc1 | EtOHnc2 | Galnc1 | Galnc2 |
| 13 | IZH3   | YLR023C   | YPDcl2 | YPDcl3 | EtOHcl1 | EtOHcl2 | Galcl1 | YPDnc1 | YPDnc2 | YPDnc3 | YPDnc4 | EtOHnc1 | EtOHnc2 | Galnc1 | Galnc2 |
| 13 | BNA4   | YBL098W   | YPDcl2 | YPDcl3 | EtOHcl1 | EtOHcl2 | Galcl1 | YPDnc1 | YPDnc2 | YPDnc3 | YPDnc4 | EtOHnc1 | EtOHnc2 | Galnc1 | Galnc2 |
| 13 | TDH2   | YJR009C   | YPDcl2 | YPDcl3 | EtOHcl1 | EtOHcl2 | Galcl1 | YPDnc1 | YPDnc2 | YPDnc3 | YPDnc4 | EtOHnc1 | EtOHnc2 | Galnc1 | Galnc2 |
| 13 | AOS1   | YPR180W   | YPDcl2 | YPDcl3 | EtOHcl1 | EtOHcl2 | Galcl1 | YPDnc1 | YPDnc2 | YPDnc3 | YPDnc4 | EtOHnc1 | EtOHnc2 | Galnc1 | Galnc2 |
| 13 | INP1   | YMR204C   | YPDcl2 | YPDcl3 | EtOHcl1 | EtOHcl2 | Galcl1 | YPDnc1 | YPDnc2 | YPDnc3 | YPDnc4 | EtOHnc1 | EtOHnc2 | Galnc1 | Galnc2 |
| 13 | ARP6   | YLR085C   | YPDcl2 | YPDcl3 | EtOHcl1 | EtOHcl2 | Galcl1 | YPDnc1 | YPDnc2 | YPDnc3 | YPDnc4 | EtOHnc1 | EtOHnc2 | Galnc1 | Galnc2 |
| 13 |        | YLR137W   | YPDcl2 | YPDcl3 | EtOHcl1 | EtOHcl2 | Galcl1 | YPDnc1 | YPDnc2 | YPDnc3 | YPDnc4 | EtOHnc1 | EtOHnc2 | Galnc1 | Galnc2 |
| 13 | BZZ1   | YHR114W   | YPDcl2 | YPDcl3 | EtOHcl1 | EtOHcl2 | Galcl1 | YPDnc1 | YPDnc2 | YPDnc3 | YPDnc4 | EtOHnc1 | EtOHnc2 | Galnc1 | Galnc2 |
| 13 | BRE1   | YDL074C   | YPDcl2 | YPDcl3 | EtOHcl1 | EtOHcl2 | Galcl1 | YPDnc1 | YPDnc2 | YPDnc3 | YPDnc4 | EtOHnc1 | EtOHnc2 | Galnc1 | Galnc2 |
| 13 | RPA135 | YPR010C   | YPDcl2 | YPDcl3 | EtOHcl1 | EtOHcl2 | Galcl1 | YPDnc1 | YPDnc2 | YPDnc3 | YPDnc4 | EtOHnc1 | EtOHnc2 | Galnc1 | Galnc2 |
| 13 | MTM1   | YGR257C   | YPDcl2 | YPDcl3 | EtOHcl1 | EtOHcl2 | Galcl1 | YPDnc1 | YPDnc2 | YPDnc3 | YPDnc4 | EtOHnc1 | EtOHnc2 | Galnc1 | Galnc2 |
| 13 | RFM1   | YOR279C   | YPDcl2 | YPDcl3 | EtOHcl1 | EtOHcl2 | Galcl1 | YPDnc1 | YPDnc2 | YPDnc3 | YPDnc4 | EtOHnc1 | EtOHnc2 | Galnc1 | Galnc2 |
| 13 | UBC12  | YLR306W   | YPDcl2 | YPDcl3 | EtOHcl1 | EtOHcl2 | Galcl1 | YPDnc1 | YPDnc2 | YPDnc3 | YPDnc4 | EtOHnc1 | EtOHnc2 | Galnc1 | Galnc2 |
| 13 | MDV1   | YJL112W   | YPDcl2 | YPDcl3 | EtOHcl1 | EtOHcl2 | Galcl1 | YPDnc1 | YPDnc2 | YPDnc3 | YPDnc4 | EtOHnc1 | EtOHnc2 | Galnc1 | Galnc2 |
| 13 | CSG2   | YBR036C   | YPDcl2 | YPDcl3 | EtOHcl1 | EtOHcl2 | Galcl1 | YPDnc1 | YPDnc2 | YPDnc3 | YPDnc4 | EtOHnc1 | EtOHnc2 | Galnc1 | Galnc2 |
| 13 | SSU1   | YPL092W   | YPDcl2 | YPDcl3 | EtOHcl1 | EtOHcl2 | Galcl1 | YPDnc1 | YPDnc2 | YPDnc3 | YPDnc4 | EtOHnc1 | EtOHnc2 | Galnc1 | Galnc2 |
| 13 | IMH1   | YLR309C   | YPDcl2 | YPDcl3 | EtOHcl1 | EtOHcl2 | Galcl1 | YPDnc1 | YPDnc2 | YPDnc3 | YPDnc4 | EtOHnc1 | EtOHnc2 | Galnc1 | Galnc2 |
| 13 |        | YIR018C-A | YPDcl2 | YPDcl3 | EtOHcl1 | EtOHcl2 | Galcl1 | YPDnc1 | YPDnc2 | YPDnc3 | YPDnc4 | EtOHnc1 | EtOHnc2 | Galnc1 | Galnc2 |
| 13 |        | YDR282C   | YPDcl2 | YPDcl3 | EtOHcl1 | EtOHcl2 | Galcl1 | YPDnc1 | YPDnc2 | YPDnc3 | YPDnc4 | EtOHnc1 | EtOHnc2 | Galnc1 | Galnc2 |
| 13 | ALG5   | YPL227C   | YPDcl2 | YPDcl3 | EtOHcl1 | EtOHcl2 | Galcl1 | YPDnc1 | YPDnc2 | YPDnc3 | YPDnc4 | EtOHnc1 | EtOHnc2 | Galnc1 | Galnc2 |
| 13 |        | YLR446W   | YPDcl2 | YPDcl3 | EtOHcl1 | EtOHcl2 | Galcl1 | YPDnc1 | YPDnc2 | YPDnc3 | YPDnc4 | EtOHnc1 | EtOHnc2 | Galnc1 | Galnc2 |
| 13 | IBI1   | YGR273C   | YPDcl2 | YPDcl3 | EtOHcl1 | EtOHcl2 | Galcl1 | YPDnc1 | YPDnc2 | YPDnc3 | YPDnc4 | EtOHnc1 | EtOHnc2 | Galnc1 | Galnc2 |
| 13 | ADD37  | YMR184W   | YPDcl2 | YPDcl3 | EtOHcl1 | EtOHcl2 | Galcl1 | YPDnc1 | YPDnc2 | YPDnc3 | YPDnc4 | EtOHnc1 | EtOHnc2 | Galnc1 | Galnc2 |
| 13 |        | YBL081W   | YPDcl2 | YPDcl3 | EtOHcl1 | EtOHcl2 | Galcl1 | YPDnc1 | YPDnc2 | YPDnc3 | YPDnc4 | EtOHnc1 | EtOHnc2 | Galnc1 | Galnc2 |
| 13 |        | YJR142W   | YPDcl2 | YPDcl3 | EtOHcl1 | EtOHcl2 | Galcl1 | YPDnc1 | YPDnc2 | YPDnc3 | YPDnc4 | EtOHnc1 | EtOHnc2 | Galnc1 | Galnc2 |
| 13 | MDM31  | YHR194W   | YPDcl2 | YPDcl3 | EtOHcl1 | EtOHcl2 | Galcl1 | YPDnc1 | YPDnc2 | YPDnc3 | YPDnc4 | EtOHnc1 | EtOHnc2 | Galnc1 | Galnc2 |
| 13 | CNN1   | YFR046C   | YPDcl2 | YPDcl3 | EtOHcl1 | EtOHcl2 | Galcl1 | YPDnc1 | YPDnc2 | YPDnc3 | YPDnc4 | EtOHnc1 | EtOHnc2 | Galnc1 | Galnc2 |
| 13 | CWH41  | YGL027C   | YPDcl2 | YPDcl3 | EtOHcl1 | EtOHcl2 | Galcl1 | YPDnc1 | YPDnc2 | YPDnc3 | YPDnc4 | EtOHnc1 | EtOHnc2 | Galnc1 | Galnc2 |
| 13 | ATG17  | YLR423C   | YPDcl2 | YPDcl3 | EtOHcl1 | EtOHcl2 | Galcl1 | YPDnc1 | YPDnc2 | YPDnc3 | YPDnc4 | EtOHnc1 | EtOHnc2 | Galnc1 | Galnc2 |
| 13 | MRPL33 | YMR286W   | YPDcl2 | YPDcl3 | EtOHcl1 | EtOHcl2 | Galcl1 | YPDnc1 | YPDnc2 | YPDnc3 | YPDnc4 | EtOHnc1 | EtOHnc2 | Galnc1 | Galnc2 |
| 13 | PUS9   | YDL036C   | YPDcl2 | YPDcl3 | EtOHcl1 | EtOHcl2 | Galcl1 | YPDnc1 | YPDnc2 | YPDnc3 | YPDnc4 | EtOHnc1 | EtOHnc2 | Galnc1 | Galnc2 |

|           |           |        |        |         |         |        |        |        |        |        |         |         |        |        |
|-----------|-----------|--------|--------|---------|---------|--------|--------|--------|--------|--------|---------|---------|--------|--------|
| 13        | YOL159C-A | YPDcl2 | YPDcl3 | EtOHcl1 | EtOHcl2 | Galcl1 | YPDnc1 | YPDnc2 | YPDnc3 | YPDnc4 | EtOHnc1 | EtOHnc2 | Galnc1 | Galnc2 |
| 13 REX3   | YLR107W   | YPDcl2 | YPDcl3 | EtOHcl1 | EtOHcl2 | Galcl1 | YPDnc1 | YPDnc2 | YPDnc3 | YPDnc4 | EtOHnc1 | EtOHnc2 | Galnc1 | Galnc2 |
| 13 PET494 | YNR045W   | YPDcl2 | YPDcl3 | EtOHcl1 | EtOHcl2 | Galcl1 | YPDnc1 | YPDnc2 | YPDnc3 | YPDnc4 | EtOHnc1 | EtOHnc2 | Galnc1 | Galnc2 |
| 13        | YER137W-  | YPDcl2 | YPDcl3 | EtOHcl1 | EtOHcl2 | Galcl1 | YPDnc1 | YPDnc2 | YPDnc3 | YPDnc4 | EtOHnc1 | EtOHnc2 | Galnc1 | Galnc2 |
| 13 ABF2   | YMR072W   | YPDcl2 | YPDcl3 | EtOHcl1 | EtOHcl2 | Galcl1 | YPDnc1 | YPDnc2 | YPDnc3 | YPDnc4 | EtOHnc1 | EtOHnc2 | Galnc1 | Galnc2 |
| 13 DNF1   | YER166W   | YPDcl2 | YPDcl3 | EtOHcl1 | EtOHcl2 | Galcl1 | YPDnc1 | YPDnc2 | YPDnc3 | YPDnc4 | EtOHnc1 | EtOHnc2 | Galnc1 | Galnc2 |
| 13        | YAL026C-A | YPDcl2 | YPDcl3 | EtOHcl1 | EtOHcl2 | Galcl1 | YPDnc1 | YPDnc2 | YPDnc3 | YPDnc4 | EtOHnc1 | EtOHnc2 | Galnc1 | Galnc2 |
| 13        | YLR163W-  | YPDcl2 | YPDcl3 | EtOHcl1 | EtOHcl2 | Galcl1 | YPDnc1 | YPDnc2 | YPDnc3 | YPDnc4 | EtOHnc1 | EtOHnc2 | Galnc1 | Galnc2 |
| 13 AHC2   | YCR082W   | YPDcl2 | YPDcl3 | EtOHcl1 | EtOHcl2 | Galcl1 | YPDnc1 | YPDnc2 | YPDnc3 | YPDnc4 | EtOHnc1 | EtOHnc2 | Galnc1 | Galnc2 |
| 13 ADR1   | YDR216W   | YPDcl2 | YPDcl3 | EtOHcl1 | EtOHcl2 | Galcl1 | YPDnc1 | YPDnc2 | YPDnc3 | YPDnc4 | EtOHnc1 | EtOHnc2 | Galnc1 | Galnc2 |
| 13 RHO2   | YNL090W   | YPDcl2 | YPDcl3 | EtOHcl1 | EtOHcl2 | Galcl1 | YPDnc1 | YPDnc2 | YPDnc3 | YPDnc4 | EtOHnc1 | EtOHnc2 | Galnc1 | Galnc2 |
| 13 UBP16  | YPL072W   | YPDcl2 | YPDcl3 | EtOHcl1 | EtOHcl2 | Galcl1 | YPDnc1 | YPDnc2 | YPDnc3 | YPDnc4 | EtOHnc1 | EtOHnc2 | Galnc1 | Galnc2 |
| 13 MIP1   | YOR330C   | YPDcl2 | YPDcl3 | EtOHcl1 | EtOHcl2 | Galcl1 | YPDnc1 | YPDnc2 | YPDnc3 | YPDnc4 | EtOHnc1 | EtOHnc2 | Galnc1 | Galnc2 |
| 13 SFB2   | YNL049C   | YPDcl2 | YPDcl3 | EtOHcl1 | EtOHcl2 | Galcl1 | YPDnc1 | YPDnc2 | YPDnc3 | YPDnc4 | EtOHnc1 | EtOHnc2 | Galnc1 | Galnc2 |
| 13 GEP7   | YGL057C   | YPDcl2 | YPDcl3 | EtOHcl1 | EtOHcl2 | Galcl1 | YPDnc1 | YPDnc2 | YPDnc3 | YPDnc4 | EtOHnc1 | EtOHnc2 | Galnc1 | Galnc2 |
| 13        | YNL108C   | YPDcl2 | YPDcl3 | EtOHcl1 | EtOHcl2 | Galcl1 | YPDnc1 | YPDnc2 | YPDnc3 | YPDnc4 | EtOHnc1 | EtOHnc2 | Galnc1 | Galnc2 |
| 13 GDA1   | YEL042W   | YPDcl2 | YPDcl3 | EtOHcl1 | EtOHcl2 | Galcl1 | YPDnc1 | YPDnc2 | YPDnc3 | YPDnc4 | EtOHnc1 | EtOHnc2 | Galnc1 | Galnc2 |
| 13        | YJR018W   | YPDcl2 | YPDcl3 | EtOHcl1 | EtOHcl2 | Galcl1 | YPDnc1 | YPDnc2 | YPDnc3 | YPDnc4 | EtOHnc1 | EtOHnc2 | Galnc1 | Galnc2 |
| 13 MSC3   | YLR219W   | YPDcl2 | YPDcl3 | EtOHcl1 | EtOHcl2 | Galcl1 | YPDnc1 | YPDnc2 | YPDnc3 | YPDnc4 | EtOHnc1 | EtOHnc2 | Galnc1 | Galnc2 |
| 13 SRV2   | YNL138W   | YPDcl2 | YPDcl3 | EtOHcl1 | EtOHcl2 | Galcl1 | YPDnc1 | YPDnc2 | YPDnc3 | YPDnc4 | EtOHnc1 | EtOHnc2 | Galnc1 | Galnc2 |
| 13 UBC4   | YBR082C   | YPDcl2 | YPDcl3 | EtOHcl1 | EtOHcl2 | Galcl1 | YPDnc1 | YPDnc2 | YPDnc3 | YPDnc4 | EtOHnc1 | EtOHnc2 | Galnc1 | Galnc2 |
| 13 KEM1   | YGL173C   | YPDcl2 | YPDcl3 | EtOHcl1 | EtOHcl2 | Galcl1 | YPDnc1 | YPDnc2 | YPDnc3 | YPDnc4 | EtOHnc1 | EtOHnc2 | Galnc1 | Galnc2 |
| 13        | YOR072W-  | YPDcl2 | YPDcl3 | EtOHcl1 | EtOHcl2 | Galcl1 | YPDnc1 | YPDnc2 | YPDnc3 | YPDnc4 | EtOHnc1 | EtOHnc2 | Galnc1 | Galnc2 |
| 13 ILV5   | YLR355C   | YPDcl2 | YPDcl3 | EtOHcl1 | EtOHcl2 | Galcl1 | YPDnc1 | YPDnc2 | YPDnc3 | YPDnc4 | EtOHnc1 | EtOHnc2 | Galnc1 | Galnc2 |
| 13 LEU5   | YHR002W   | YPDcl2 | YPDcl3 | EtOHcl1 | EtOHcl2 | Galcl1 | YPDnc1 | YPDnc2 | YPDnc3 | YPDnc4 | EtOHnc1 | EtOHnc2 | Galnc1 | Galnc2 |
| 13 MET31  | YPL038W   | YPDcl2 | YPDcl3 | EtOHcl1 | EtOHcl2 | Galcl1 | YPDnc1 | YPDnc2 | YPDnc3 | YPDnc4 | EtOHnc1 | EtOHnc2 | Galnc1 | Galnc2 |
| 13 OXR1   | YPL196W   | YPDcl2 | YPDcl3 | EtOHcl1 | EtOHcl2 | Galcl1 | YPDnc1 | YPDnc2 | YPDnc3 | YPDnc4 | EtOHnc1 | EtOHnc2 | Galnc1 | Galnc2 |
| 13        | YER088W-  | YPDcl2 | YPDcl3 | EtOHcl1 | EtOHcl2 | Galcl1 | YPDnc1 | YPDnc2 | YPDnc3 | YPDnc4 | EtOHnc1 | EtOHnc2 | Galnc1 | Galnc2 |
| 13 BPH1   | YCR032W   | YPDcl2 | YPDcl3 | EtOHcl1 | EtOHcl2 | Galcl1 | YPDnc1 | YPDnc2 | YPDnc3 | YPDnc4 | EtOHnc1 | EtOHnc2 | Galnc1 | Galnc2 |
| 13        | YJL015C   | YPDcl2 | YPDcl3 | EtOHcl1 | EtOHcl2 | Galcl1 | YPDnc1 | YPDnc2 | YPDnc3 | YPDnc4 | EtOHnc1 | EtOHnc2 | Galnc1 | Galnc2 |
| 13        | YIL169C   | YPDcl2 | YPDcl3 | EtOHcl1 | EtOHcl2 | Galcl1 | YPDnc1 | YPDnc2 | YPDnc3 | YPDnc4 | EtOHnc1 | EtOHnc2 | Galnc1 | Galnc2 |
| 13 RMT2   | YDR465C   | YPDcl2 | YPDcl3 | EtOHcl1 | EtOHcl2 | Galcl1 | YPDnc1 | YPDnc2 | YPDnc3 | YPDnc4 | EtOHnc1 | EtOHnc2 | Galnc1 | Galnc2 |
| 13 HIS4   | YCL030C   | YPDcl2 | YPDcl3 | EtOHcl1 | EtOHcl2 | Galcl1 | YPDnc1 | YPDnc2 | YPDnc3 | YPDnc4 | EtOHnc1 | EtOHnc2 | Galnc1 | Galnc2 |
| 13 ECI1   | YLR284C   | YPDcl2 | YPDcl3 | EtOHcl1 | EtOHcl2 | Galcl1 | YPDnc1 | YPDnc2 | YPDnc3 | YPDnc4 | EtOHnc1 | EtOHnc2 | Galnc1 | Galnc2 |

|    |        |          |        |        |         |         |        |        |        |        |        |         |         |        |        |
|----|--------|----------|--------|--------|---------|---------|--------|--------|--------|--------|--------|---------|---------|--------|--------|
| 13 | RAD16  | YBR114W  | YPDcl2 | YPDcl3 | EtOHcl1 | EtOHcl2 | Galcl1 | YPDnc1 | YPDnc2 | YPDnc3 | YPDnc4 | EtOHnc1 | EtOHnc2 | Galnc1 | Galnc2 |
| 13 | PET127 | YOR017W  | YPDcl2 | YPDcl3 | EtOHcl1 | EtOHcl2 | Galcl1 | YPDnc1 | YPDnc2 | YPDnc3 | YPDnc4 | EtOHnc1 | EtOHnc2 | Galnc1 | Galnc2 |
| 13 |        | YML099W- | YPDcl2 | YPDcl3 | EtOHcl1 | EtOHcl2 | Galcl1 | YPDnc1 | YPDnc2 | YPDnc3 | YPDnc4 | EtOHnc1 | EtOHnc2 | Galnc1 | Galnc2 |
| 13 | PRK1   | YIL095W  | YPDcl2 | YPDcl3 | EtOHcl1 | EtOHcl2 | Galcl1 | YPDnc1 | YPDnc2 | YPDnc3 | YPDnc4 | EtOHnc1 | EtOHnc2 | Galnc1 | Galnc2 |
| 13 | YSY6   | YBR162W- | YPDcl2 | YPDcl3 | EtOHcl1 | EtOHcl2 | Galcl1 | YPDnc1 | YPDnc2 | YPDnc3 | YPDnc4 | EtOHnc1 | EtOHnc2 | Galnc1 | Galnc2 |
| 13 | NUP157 | YER105C  | YPDcl2 | YPDcl3 | EtOHcl1 | EtOHcl2 | Galcl1 | YPDnc1 | YPDnc2 | YPDnc3 | YPDnc4 | EtOHnc1 | EtOHnc2 | Galnc1 | Galnc2 |
| 13 | GAL2   | YLR081W  | YPDcl2 | YPDcl3 | EtOHcl1 | EtOHcl2 | Galcl1 | YPDnc1 | YPDnc2 | YPDnc3 | YPDnc4 | EtOHnc1 | EtOHnc2 | Galnc1 | Galnc2 |
| 13 |        | YEL053W- | YPDcl2 | YPDcl3 | EtOHcl1 | EtOHcl2 | Galcl1 | YPDnc1 | YPDnc2 | YPDnc3 | YPDnc4 | EtOHnc1 | EtOHnc2 | Galnc1 | Galnc2 |
| 13 | RPO41  | YFL036W  | YPDcl2 | YPDcl3 | EtOHcl1 | EtOHcl2 | Galcl1 | YPDnc1 | YPDnc2 | YPDnc3 | YPDnc4 | EtOHnc1 | EtOHnc2 | Galnc1 | Galnc2 |
| 13 | RAD27  | YKL113C  | YPDcl2 | YPDcl3 | EtOHcl1 | EtOHcl2 | Galcl1 | YPDnc1 | YPDnc2 | YPDnc3 | YPDnc4 | EtOHnc1 | EtOHnc2 | Galnc1 | Galnc2 |
| 13 | TRM3   | YDL112W  | YPDcl2 | YPDcl3 | EtOHcl1 | EtOHcl2 | Galcl1 | YPDnc1 | YPDnc2 | YPDnc3 | YPDnc4 | EtOHnc1 | EtOHnc2 | Galnc1 | Galnc2 |
| 13 |        | YDL228C  | YPDcl2 | YPDcl3 | EtOHcl1 | EtOHcl2 | Galcl1 | YPDnc1 | YPDnc2 | YPDnc3 | YPDnc4 | EtOHnc1 | EtOHnc2 | Galnc1 | Galnc2 |
| 13 | TPA1   | YER049W  | YPDcl2 | YPDcl3 | EtOHcl1 | EtOHcl2 | Galcl1 | YPDnc1 | YPDnc2 | YPDnc3 | YPDnc4 | EtOHnc1 | EtOHnc2 | Galnc1 | Galnc2 |
| 13 |        | YDR179W- | YPDcl2 | YPDcl3 | EtOHcl1 | EtOHcl2 | Galcl1 | YPDnc1 | YPDnc2 | YPDnc3 | YPDnc4 | EtOHnc1 | EtOHnc2 | Galnc1 | Galnc2 |
| 13 | SSQ1   | YLR369W  | YPDcl2 | YPDcl3 | EtOHcl1 | EtOHcl2 | Galcl1 | YPDnc1 | YPDnc2 | YPDnc3 | YPDnc4 | EtOHnc1 | EtOHnc2 | Galnc1 | Galnc2 |
| 13 |        | YJL171C  | YPDcl2 | YPDcl3 | EtOHcl1 | EtOHcl2 | Galcl1 | YPDnc1 | YPDnc2 | YPDnc3 | YPDnc4 | EtOHnc1 | EtOHnc2 | Galnc1 | Galnc2 |
| 13 | SAF1   | YBR280C  | YPDcl2 | YPDcl3 | EtOHcl1 | EtOHcl2 | Galcl1 | YPDnc1 | YPDnc2 | YPDnc3 | YPDnc4 | EtOHnc1 | EtOHnc2 | Galnc1 | Galnc2 |
| 13 |        | YBR259W  | YPDcl2 | YPDcl3 | EtOHcl1 | EtOHcl2 | Galcl1 | YPDnc1 | YPDnc2 | YPDnc3 | YPDnc4 | EtOHnc1 | EtOHnc2 | Galnc1 | Galnc2 |
| 13 |        | YML084W  | YPDcl2 | YPDcl3 | EtOHcl1 | EtOHcl2 | Galcl1 | YPDnc1 | YPDnc2 | YPDnc3 | YPDnc4 | EtOHnc1 | EtOHnc2 | Galnc1 | Galnc2 |
| 13 | GTS1   | YGL181W  | YPDcl2 | YPDcl3 | EtOHcl1 | EtOHcl2 | Galcl1 | YPDnc1 | YPDnc2 | YPDnc3 | YPDnc4 | EtOHnc1 | EtOHnc2 | Galnc1 | Galnc2 |
| 13 | BCD1   | YHR040W  | YPDcl2 | YPDcl3 | EtOHcl1 | EtOHcl2 | Galcl1 | YPDnc1 | YPDnc2 | YPDnc3 | YPDnc4 | EtOHnc1 | EtOHnc2 | Galnc1 | Galnc2 |
| 13 | FLO10  | YKR102W  | YPDcl2 | YPDcl3 | EtOHcl1 | EtOHcl2 | Galcl1 | YPDnc1 | YPDnc2 | YPDnc3 | YPDnc4 | EtOHnc1 | EtOHnc2 | Galnc1 | Galnc2 |
| 13 | RRN9   | YMR270C  | YPDcl2 | YPDcl3 | EtOHcl1 | EtOHcl2 | Galcl1 | YPDnc1 | YPDnc2 | YPDnc3 | YPDnc4 | EtOHnc1 | EtOHnc2 | Galnc1 | Galnc2 |
| 13 | JIP4   | YDR475C  | YPDcl2 | YPDcl3 | EtOHcl1 | EtOHcl2 | Galcl1 | YPDnc1 | YPDnc2 | YPDnc3 | YPDnc4 | EtOHnc1 | EtOHnc2 | Galnc1 | Galnc2 |
| 13 |        | YJR023C  | YPDcl2 | YPDcl3 | EtOHcl1 | EtOHcl2 | Galcl1 | YPDnc1 | YPDnc2 | YPDnc3 | YPDnc4 | EtOHnc1 | EtOHnc2 | Galnc1 | Galnc2 |
| 13 | GCS1   | YDL226C  | YPDcl2 | YPDcl3 | EtOHcl1 | EtOHcl2 | Galcl1 | YPDnc1 | YPDnc2 | YPDnc3 | YPDnc4 | EtOHnc1 | EtOHnc2 | Galnc1 | Galnc2 |
| 13 | UTP4   | YDR324C  | YPDcl2 | YPDcl3 | EtOHcl1 | EtOHcl2 | Galcl1 | YPDnc1 | YPDnc2 | YPDnc3 | YPDnc4 | EtOHnc1 | EtOHnc2 | Galnc1 | Galnc2 |
| 13 |        | YER128W  | YPDcl2 | YPDcl3 | EtOHcl1 | EtOHcl2 | Galcl1 | YPDnc1 | YPDnc2 | YPDnc3 | YPDnc4 | EtOHnc1 | EtOHnc2 | Galnc1 | Galnc2 |
| 13 | YIP4   | YGL198W  | YPDcl2 | YPDcl3 | EtOHcl1 | EtOHcl2 | Galcl1 | YPDnc1 | YPDnc2 | YPDnc3 | YPDnc4 | EtOHnc1 | EtOHnc2 | Galnc1 | Galnc2 |
| 13 | SEC14  | YMR079W  | YPDcl2 | YPDcl3 | EtOHcl1 | EtOHcl2 | Galcl1 | YPDnc1 | YPDnc2 | YPDnc3 | YPDnc4 | EtOHnc1 | EtOHnc2 | Galnc1 | Galnc2 |
| 13 | FUN26  | YAL022C  | YPDcl2 | YPDcl3 | EtOHcl1 | EtOHcl2 | Galcl1 | YPDnc1 | YPDnc2 | YPDnc3 | YPDnc4 | EtOHnc1 | EtOHnc2 | Galnc1 | Galnc2 |
| 13 | RPF2   | YKR081C  | YPDcl2 | YPDcl3 | EtOHcl1 | EtOHcl2 | Galcl1 | YPDnc1 | YPDnc2 | YPDnc3 | YPDnc4 | EtOHnc1 | EtOHnc2 | Galnc1 | Galnc2 |
| 13 | CUE1   | YMR264W  | YPDcl2 | YPDcl3 | EtOHcl1 | EtOHcl2 | Galcl1 | YPDnc1 | YPDnc2 | YPDnc3 | YPDnc4 | EtOHnc1 | EtOHnc2 | Galnc1 | Galnc2 |
| 13 | DUS3   | YLR401C  | YPDcl2 | YPDcl3 | EtOHcl1 | EtOHcl2 | Galcl1 | YPDnc1 | YPDnc2 | YPDnc3 | YPDnc4 | EtOHnc1 | EtOHnc2 | Galnc1 | Galnc2 |

|    |       |           |        |        |         |         |        |        |        |        |        |         |         |        |        |
|----|-------|-----------|--------|--------|---------|---------|--------|--------|--------|--------|--------|---------|---------|--------|--------|
| 13 | UBS1  | YBR165W   | YPDcl2 | YPDcl3 | EtOHcl1 | EtOHcl2 | Galcl1 | YPDnc1 | YPDnc2 | YPDnc3 | YPDnc4 | EtOHnc1 | EtOHnc2 | Galnc1 | Galnc2 |
| 13 |       | YOL046C   | YPDcl2 | YPDcl3 | EtOHcl1 | EtOHcl2 | Galcl1 | YPDnc1 | YPDnc2 | YPDnc3 | YPDnc4 | EtOHnc1 | EtOHnc2 | Galnc1 | Galnc2 |
| 13 | KRE27 | YIL027C   | YPDcl2 | YPDcl3 | EtOHcl1 | EtOHcl2 | Galcl1 | YPDnc1 | YPDnc2 | YPDnc3 | YPDnc4 | EtOHnc1 | EtOHnc2 | Galnc1 | Galnc2 |
| 13 | MSO1  | YNR049C   | YPDcl2 | YPDcl3 | EtOHcl1 | EtOHcl2 | Galcl1 | YPDnc1 | YPDnc2 | YPDnc3 | YPDnc4 | EtOHnc1 | EtOHnc2 | Galnc1 | Galnc2 |
| 13 | GYP5  | YPL249C   | YPDcl2 | YPDcl3 | EtOHcl1 | EtOHcl2 | Galcl1 | YPDnc1 | YPDnc2 | YPDnc3 | YPDnc4 | EtOHnc1 | EtOHnc2 | Galnc1 | Galnc2 |
| 13 | BEM2  | YER155C   | YPDcl2 | YPDcl3 | EtOHcl1 | EtOHcl2 | Galcl1 | YPDnc1 | YPDnc2 | YPDnc3 | YPDnc4 | EtOHnc1 | EtOHnc2 | Galnc1 | Galnc2 |
| 13 | ACE2  | YLR131C   | YPDcl2 | YPDcl3 | EtOHcl1 | EtOHcl2 | Galcl1 | YPDnc1 | YPDnc2 | YPDnc3 | YPDnc4 | EtOHnc1 | EtOHnc2 | Galnc1 | Galnc2 |
| 13 | SNC1  | YAL030W   | YPDcl2 | YPDcl3 | EtOHcl1 | EtOHcl2 | Galcl1 | YPDnc1 | YPDnc2 | YPDnc3 | YPDnc4 | EtOHnc1 | EtOHnc2 | Galnc1 | Galnc2 |
| 13 | BUD14 | YAR014C   | YPDcl2 | YPDcl3 | EtOHcl1 | EtOHcl2 | Galcl1 | YPDnc1 | YPDnc2 | YPDnc3 | YPDnc4 | EtOHnc1 | EtOHnc2 | Galnc1 | Galnc2 |
| 13 |       | YER156C   | YPDcl2 | YPDcl3 | EtOHcl1 | EtOHcl2 | Galcl1 | YPDnc1 | YPDnc2 | YPDnc3 | YPDnc4 | EtOHnc1 | EtOHnc2 | Galnc1 | Galnc2 |
| 13 |       | YBR238C   | YPDcl2 | YPDcl3 | EtOHcl1 | EtOHcl2 | Galcl1 | YPDnc1 | YPDnc2 | YPDnc3 | YPDnc4 | EtOHnc1 | EtOHnc2 | Galnc1 | Galnc2 |
| 13 |       | YIL156W-A | YPDcl2 | YPDcl3 | EtOHcl1 | EtOHcl2 | Galcl1 | YPDnc1 | YPDnc2 | YPDnc3 | YPDnc4 | EtOHnc1 | EtOHnc2 | Galnc1 | Galnc2 |
| 13 | STF1  | YDL130W-  | YPDcl2 | YPDcl3 | EtOHcl1 | EtOHcl2 | Galcl1 | YPDnc1 | YPDnc2 | YPDnc3 | YPDnc4 | EtOHnc1 | EtOHnc2 | Galnc1 | Galnc2 |
| 13 | EST1  | YLR233C   | YPDcl2 | YPDcl3 | EtOHcl1 | EtOHcl2 | Galcl1 | YPDnc1 | YPDnc2 | YPDnc3 | YPDnc4 | EtOHnc1 | EtOHnc2 | Galnc1 | Galnc2 |
| 13 |       | YCL046W   | YPDcl2 | YPDcl3 | EtOHcl1 | EtOHcl2 | Galcl1 | YPDnc1 | YPDnc2 | YPDnc3 | YPDnc4 | EtOHnc1 | EtOHnc2 | Galnc1 | Galnc2 |
| 13 | HHO1  | YPL127C   | YPDcl2 | YPDcl3 | EtOHcl1 | EtOHcl2 | Galcl1 | YPDnc1 | YPDnc2 | YPDnc3 | YPDnc4 | EtOHnc1 | EtOHnc2 | Galnc1 | Galnc2 |
| 13 |       | YPL077C   | YPDcl2 | YPDcl3 | EtOHcl1 | EtOHcl2 | Galcl1 | YPDnc1 | YPDnc2 | YPDnc3 | YPDnc4 | EtOHnc1 | EtOHnc2 | Galnc1 | Galnc2 |
| 13 | AIM36 | YMR157C   | YPDcl2 | YPDcl3 | EtOHcl1 | EtOHcl2 | Galcl1 | YPDnc1 | YPDnc2 | YPDnc3 | YPDnc4 | EtOHnc1 | EtOHnc2 | Galnc1 | Galnc2 |
| 13 | ALG6  | YOR002W   | YPDcl2 | YPDcl3 | EtOHcl1 | EtOHcl2 | Galcl1 | YPDnc1 | YPDnc2 | YPDnc3 | YPDnc4 | EtOHnc1 | EtOHnc2 | Galnc1 | Galnc2 |
| 13 | ECM5  | YMR176W   | YPDcl2 | YPDcl3 | EtOHcl1 | EtOHcl2 | Galcl1 | YPDnc1 | YPDnc2 | YPDnc3 | YPDnc4 | EtOHnc1 | EtOHnc2 | Galnc1 | Galnc2 |
| 13 | SWI4  | YER111C   | YPDcl2 | YPDcl3 | EtOHcl1 | EtOHcl2 | Galcl1 | YPDnc1 | YPDnc2 | YPDnc3 | YPDnc4 | EtOHnc1 | EtOHnc2 | Galnc1 | Galnc2 |
| 13 |       | YGL182C   | YPDcl2 | YPDcl3 | EtOHcl1 | EtOHcl2 | Galcl1 | YPDnc1 | YPDnc2 | YPDnc3 | YPDnc4 | EtOHnc1 | EtOHnc2 | Galnc1 | Galnc2 |
| 13 | ALE1  | YOR175C   | YPDcl2 | YPDcl3 | EtOHcl1 | EtOHcl2 | Galcl1 | YPDnc1 | YPDnc2 | YPDnc3 | YPDnc4 | EtOHnc1 | EtOHnc2 | Galnc1 | Galnc2 |
| 13 | BDH2  | YAL061W   | YPDcl2 | YPDcl3 | EtOHcl1 | EtOHcl2 | Galcl1 | YPDnc1 | YPDnc2 | YPDnc3 | YPDnc4 | EtOHnc1 | EtOHnc2 | Galnc1 | Galnc2 |
| 13 | RSM27 | YGR215W   | YPDcl2 | YPDcl3 | EtOHcl1 | EtOHcl2 | Galcl1 | YPDnc1 | YPDnc2 | YPDnc3 | YPDnc4 | EtOHnc1 | EtOHnc2 | Galnc1 | Galnc2 |
| 13 |       | YKL161C   | YPDcl2 | YPDcl3 | EtOHcl1 | EtOHcl2 | Galcl1 | YPDnc1 | YPDnc2 | YPDnc3 | YPDnc4 | EtOHnc1 | EtOHnc2 | Galnc1 | Galnc2 |
| 13 | SLD5  | YDR489W   | YPDcl2 | YPDcl3 | EtOHcl1 | EtOHcl2 | Galcl1 | YPDnc1 | YPDnc2 | YPDnc3 | YPDnc4 | EtOHnc1 | EtOHnc2 | Galnc1 | Galnc2 |
| 13 |       | YML096W   | YPDcl2 | YPDcl3 | EtOHcl1 | EtOHcl2 | Galcl1 | YPDnc1 | YPDnc2 | YPDnc3 | YPDnc4 | EtOHnc1 | EtOHnc2 | Galnc1 | Galnc2 |
| 13 | UTP10 | YJL109C   | YPDcl2 | YPDcl3 | EtOHcl1 | EtOHcl2 | Galcl1 | YPDnc1 | YPDnc2 | YPDnc3 | YPDnc4 | EtOHnc1 | EtOHnc2 | Galnc1 | Galnc2 |
| 13 | TOS3  | YGL179C   | YPDcl2 | YPDcl3 | EtOHcl1 | EtOHcl2 | Galcl1 | YPDnc1 | YPDnc2 | YPDnc3 | YPDnc4 | EtOHnc1 | EtOHnc2 | Galnc1 | Galnc2 |
| 13 |       | YGL235W   | YPDcl2 | YPDcl3 | EtOHcl1 | EtOHcl2 | Galcl1 | YPDnc1 | YPDnc2 | YPDnc3 | YPDnc4 | EtOHnc1 | EtOHnc2 | Galnc1 | Galnc2 |
| 13 | YTA12 | YMR089C   | YPDcl2 | YPDcl3 | EtOHcl1 | EtOHcl2 | Galcl1 | YPDnc1 | YPDnc2 | YPDnc3 | YPDnc4 | EtOHnc1 | EtOHnc2 | Galnc1 | Galnc2 |
| 13 | BUB1  | YGR188C   | YPDcl2 | YPDcl3 | EtOHcl1 | EtOHcl2 | Galcl1 | YPDnc1 | YPDnc2 | YPDnc3 | YPDnc4 | EtOHnc1 | EtOHnc2 | Galnc1 | Galnc2 |
| 13 | PSK2  | YOL045W   | YPDcl2 | YPDcl3 | EtOHcl1 | EtOHcl2 | Galcl1 | YPDnc1 | YPDnc2 | YPDnc3 | YPDnc4 | EtOHnc1 | EtOHnc2 | Galnc1 | Galnc2 |

|          |           |        |        |         |         |        |        |        |        |        |         |         |        |        |
|----------|-----------|--------|--------|---------|---------|--------|--------|--------|--------|--------|---------|---------|--------|--------|
| 13 TYW1  | YPL207W   | YPDcl2 | YPDcl3 | EtOHcl1 | EtOHcl2 | Galcl1 | YPDnc1 | YPDnc2 | YPDnc3 | YPDnc4 | EtOHnc1 | EtOHnc2 | Galnc1 | Galnc2 |
| 13 CNB1  | YKL190W   | YPDcl2 | YPDcl3 | EtOHcl1 | EtOHcl2 | Galcl1 | YPDnc1 | YPDnc2 | YPDnc3 | YPDnc4 | EtOHnc1 | EtOHnc2 | Galnc1 | Galnc2 |
| 13 KIN82 | YCR091W   | YPDcl2 | YPDcl3 | EtOHcl1 | EtOHcl2 | Galcl1 | YPDnc1 | YPDnc2 | YPDnc3 | YPDnc4 | EtOHnc1 | EtOHnc2 | Galnc1 | Galnc2 |
| 13 RPG1  | YBR079C   | YPDcl2 | YPDcl3 | EtOHcl1 | EtOHcl2 | Galcl1 | YPDnc1 | YPDnc2 | YPDnc3 | YPDnc4 | EtOHnc1 | EtOHnc2 | Galnc1 | Galnc2 |
| 13 KEX1  | YGL203C   | YPDcl2 | YPDcl3 | EtOHcl1 | EtOHcl2 | Galcl1 | YPDnc1 | YPDnc2 | YPDnc3 | YPDnc4 | EtOHnc1 | EtOHnc2 | Galnc1 | Galnc2 |
| 13 PRM5  | YIL117C   | YPDcl2 | YPDcl3 | EtOHcl1 | EtOHcl2 | Galcl1 | YPDnc1 | YPDnc2 | YPDnc3 | YPDnc4 | EtOHnc1 | EtOHnc2 | Galnc1 | Galnc2 |
| 13 NMD2  | YHR077C   | YPDcl2 | YPDcl3 | EtOHcl1 | EtOHcl2 | Galcl1 | YPDnc1 | YPDnc2 | YPDnc3 | YPDnc4 | EtOHnc1 | EtOHnc2 | Galnc1 | Galnc2 |
| 13 FRE7  | YOL152W   | YPDcl2 | YPDcl3 | EtOHcl1 | EtOHcl2 | Galcl1 | YPDnc1 | YPDnc2 | YPDnc3 | YPDnc4 | EtOHnc1 | EtOHnc2 | Galnc1 | Galnc2 |
| 13       | YDL240C-A | YPDcl2 | YPDcl3 | EtOHcl1 | EtOHcl2 | Galcl1 | YPDnc1 | YPDnc2 | YPDnc3 | YPDnc4 | EtOHnc1 | EtOHnc2 | Galnc1 | Galnc2 |
| 13 MNS1  | YJR131W   | YPDcl2 | YPDcl3 | EtOHcl1 | EtOHcl2 | Galcl1 | YPDnc1 | YPDnc2 | YPDnc3 | YPDnc4 | EtOHnc1 | EtOHnc2 | Galnc1 | Galnc2 |
| 13 COX16 | YJL003W   | YPDcl2 | YPDcl3 | EtOHcl1 | EtOHcl2 | Galcl1 | YPDnc1 | YPDnc2 | YPDnc3 | YPDnc4 | EtOHnc1 | EtOHnc2 | Galnc1 | Galnc2 |
| 13 PMS1  | YNL082W   | YPDcl2 | YPDcl3 | EtOHcl1 | EtOHcl2 | Galcl1 | YPDnc1 | YPDnc2 | YPDnc3 | YPDnc4 | EtOHnc1 | EtOHnc2 | Galnc1 | Galnc2 |
| 13 CAB5  | YDR196C   | YPDcl2 | YPDcl3 | EtOHcl1 | EtOHcl2 | Galcl1 | YPDnc1 | YPDnc2 | YPDnc3 | YPDnc4 | EtOHnc1 | EtOHnc2 | Galnc1 | Galnc2 |
| 13       | YLR286W-A | YPDcl2 | YPDcl3 | EtOHcl1 | EtOHcl2 | Galcl1 | YPDnc1 | YPDnc2 | YPDnc3 | YPDnc4 | EtOHnc1 | EtOHnc2 | Galnc1 | Galnc2 |
| 13 SEC31 | YDL195W   | YPDcl2 | YPDcl3 | EtOHcl1 | EtOHcl2 | Galcl1 | YPDnc1 | YPDnc2 | YPDnc3 | YPDnc4 | EtOHnc1 | EtOHnc2 | Galnc1 | Galnc2 |
| 13 SYT1  | YPR095C   | YPDcl2 | YPDcl3 | EtOHcl1 | EtOHcl2 | Galcl1 | YPDnc1 | YPDnc2 | YPDnc3 | YPDnc4 | EtOHnc1 | EtOHnc2 | Galnc1 | Galnc2 |
| 13 SUM1  | YDR310C   | YPDcl2 | YPDcl3 | EtOHcl1 | EtOHcl2 | Galcl1 | YPDnc1 | YPDnc2 | YPDnc3 | YPDnc4 | EtOHnc1 | EtOHnc2 | Galnc1 | Galnc2 |
| 13 DGA1  | YOR245C   | YPDcl2 | YPDcl3 | EtOHcl1 | EtOHcl2 | Galcl1 | YPDnc1 | YPDnc2 | YPDnc3 | YPDnc4 | EtOHnc1 | EtOHnc2 | Galnc1 | Galnc2 |
| 13       | YPL102C   | YPDcl2 | YPDcl3 | EtOHcl1 | EtOHcl2 | Galcl1 | YPDnc1 | YPDnc2 | YPDnc3 | YPDnc4 | EtOHnc1 | EtOHnc2 | Galnc1 | Galnc2 |
| 13       | YOR335W-A | YPDcl2 | YPDcl3 | EtOHcl1 | EtOHcl2 | Galcl1 | YPDnc1 | YPDnc2 | YPDnc3 | YPDnc4 | EtOHnc1 | EtOHnc2 | Galnc1 | Galnc2 |
| 13 THI73 | YLR004C   | YPDcl2 | YPDcl3 | EtOHcl1 | EtOHcl2 | Galcl1 | YPDnc1 | YPDnc2 | YPDnc3 | YPDnc4 | EtOHnc1 | EtOHnc2 | Galnc1 | Galnc2 |
| 13       | YDL241W   | YPDcl2 | YPDcl3 | EtOHcl1 | EtOHcl2 | Galcl1 | YPDnc1 | YPDnc2 | YPDnc3 | YPDnc4 | EtOHnc1 | EtOHnc2 | Galnc1 | Galnc2 |
| 13 TRF5  | YNL299W   | YPDcl2 | YPDcl3 | EtOHcl1 | EtOHcl2 | Galcl1 | YPDnc1 | YPDnc2 | YPDnc3 | YPDnc4 | EtOHnc1 | EtOHnc2 | Galnc1 | Galnc2 |
| 13 IKS1  | YJL057C   | YPDcl2 | YPDcl3 | EtOHcl1 | EtOHcl2 | Galcl1 | YPDnc1 | YPDnc2 | YPDnc3 | YPDnc4 | EtOHnc1 | EtOHnc2 | Galnc1 | Galnc2 |
| 13 NOP8  | YOL144W   | YPDcl2 | YPDcl3 | EtOHcl1 | EtOHcl2 | Galcl1 | YPDnc1 | YPDnc2 | YPDnc3 | YPDnc4 | EtOHnc1 | EtOHnc2 | Galnc1 | Galnc2 |
| 13 BUD28 | YLR062C   | YPDcl2 | YPDcl3 | EtOHcl1 | EtOHcl2 | Galcl1 | YPDnc1 | YPDnc2 | YPDnc3 | YPDnc4 | EtOHnc1 | EtOHnc2 | Galnc1 | Galnc2 |
| 13 ATG22 | YCL038C   | YPDcl2 | YPDcl3 | EtOHcl1 | EtOHcl2 | Galcl1 | YPDnc1 | YPDnc2 | YPDnc3 | YPDnc4 | EtOHnc1 | EtOHnc2 | Galnc1 | Galnc2 |
| 13       | YFR036W-A | YPDcl2 | YPDcl3 | EtOHcl1 | EtOHcl2 | Galcl1 | YPDnc1 | YPDnc2 | YPDnc3 | YPDnc4 | EtOHnc1 | EtOHnc2 | Galnc1 | Galnc2 |
| 13 GLE1  | YDL207W   | YPDcl2 | YPDcl3 | EtOHcl1 | EtOHcl2 | Galcl1 | YPDnc1 | YPDnc2 | YPDnc3 | YPDnc4 | EtOHnc1 | EtOHnc2 | Galnc1 | Galnc2 |
| 13 ARG81 | YML099C   | YPDcl2 | YPDcl3 | EtOHcl1 | EtOHcl2 | Galcl1 | YPDnc1 | YPDnc2 | YPDnc3 | YPDnc4 | EtOHnc1 | EtOHnc2 | Galnc1 | Galnc2 |
| 13       | YAR019W-A | YPDcl2 | YPDcl3 | EtOHcl1 | EtOHcl2 | Galcl1 | YPDnc1 | YPDnc2 | YPDnc3 | YPDnc4 | EtOHnc1 | EtOHnc2 | Galnc1 | Galnc2 |
| 13       | YCR006C   | YPDcl2 | YPDcl3 | EtOHcl1 | EtOHcl2 | Galcl1 | YPDnc1 | YPDnc2 | YPDnc3 | YPDnc4 | EtOHnc1 | EtOHnc2 | Galnc1 | Galnc2 |
| 13 FRA2  | YGL220W   | YPDcl2 | YPDcl3 | EtOHcl1 | EtOHcl2 | Galcl1 | YPDnc1 | YPDnc2 | YPDnc3 | YPDnc4 | EtOHnc1 | EtOHnc2 | Galnc1 | Galnc2 |
| 13       | YLR042C   | YPDcl2 | YPDcl3 | EtOHcl1 | EtOHcl2 | Galcl1 | YPDnc1 | YPDnc2 | YPDnc3 | YPDnc4 | EtOHnc1 | EtOHnc2 | Galnc1 | Galnc2 |

|    |       |           |        |        |         |         |        |        |        |        |        |         |         |        |        |
|----|-------|-----------|--------|--------|---------|---------|--------|--------|--------|--------|--------|---------|---------|--------|--------|
| 13 | AIM11 | YER093C-A | YPDcl2 | YPDcl3 | EtOHcl1 | EtOHcl2 | Galcl1 | YPDnc1 | YPDnc2 | YPDnc3 | YPDnc4 | EtOHnc1 | EtOHnc2 | Galnc1 | Galnc2 |
| 13 | TUS1  | YLR425W   | YPDcl2 | YPDcl3 | EtOHcl1 | EtOHcl2 | Galcl1 | YPDnc1 | YPDnc2 | YPDnc3 | YPDnc4 | EtOHnc1 | EtOHnc2 | Galnc1 | Galnc2 |
| 13 | TUF1  | YOR187W   | YPDcl2 | YPDcl3 | EtOHcl1 | EtOHcl2 | Galcl1 | YPDnc1 | YPDnc2 | YPDnc3 | YPDnc4 | EtOHnc1 | EtOHnc2 | Galnc1 | Galnc2 |
| 13 | YAF9  | YNL107W   | YPDcl2 | YPDcl3 | EtOHcl1 | EtOHcl2 | Galcl1 | YPDnc1 | YPDnc2 | YPDnc3 | YPDnc4 | EtOHnc1 | EtOHnc2 | Galnc1 | Galnc2 |
| 13 | YGP1  | YNL160W   | YPDcl2 | YPDcl3 | EtOHcl1 | EtOHcl2 | Galcl1 | YPDnc1 | YPDnc2 | YPDnc3 | YPDnc4 | EtOHnc1 | EtOHnc2 | Galnc1 | Galnc2 |
| 13 | ANP1  | YEL036C   | YPDcl2 | YPDcl3 | EtOHcl1 | EtOHcl2 | Galcl1 | YPDnc1 | YPDnc2 | YPDnc3 | YPDnc4 | EtOHnc1 | EtOHnc2 | Galnc1 | Galnc2 |
| 13 | TIM54 | YJL054W   | YPDcl2 | YPDcl3 | EtOHcl1 | EtOHcl2 | Galcl1 | YPDnc1 | YPDnc2 | YPDnc3 | YPDnc4 | EtOHnc1 | EtOHnc2 | Galnc1 | Galnc2 |
| 13 | SCJ1  | YMR214W   | YPDcl2 | YPDcl3 | EtOHcl1 | EtOHcl2 | Galcl1 | YPDnc1 | YPDnc2 | YPDnc3 | YPDnc4 | EtOHnc1 | EtOHnc2 | Galnc1 | Galnc2 |
| 13 | UBX5  | YDR330W   | YPDcl2 | YPDcl3 | EtOHcl1 | EtOHcl2 | Galcl1 | YPDnc1 | YPDnc2 | YPDnc3 | YPDnc4 | EtOHnc1 | EtOHnc2 | Galnc1 | Galnc2 |
| 13 | AME1  | YBR211C   | YPDcl2 | YPDcl3 | EtOHcl1 | EtOHcl2 | Galcl1 | YPDnc1 | YPDnc2 | YPDnc3 | YPDnc4 | EtOHnc1 | EtOHnc2 | Galnc1 | Galnc2 |
| 13 | LRO1  | YNR008W   | YPDcl2 | YPDcl3 | EtOHcl1 | EtOHcl2 | Galcl1 | YPDnc1 | YPDnc2 | YPDnc3 | YPDnc4 | EtOHnc1 | EtOHnc2 | Galnc1 | Galnc2 |
| 13 | CBT1  | YKL208W   | YPDcl2 | YPDcl3 | EtOHcl1 | EtOHcl2 | Galcl1 | YPDnc1 | YPDnc2 | YPDnc3 | YPDnc4 | EtOHnc1 | EtOHnc2 | Galnc1 | Galnc2 |
| 13 | HNM1  | YGL077C   | YPDcl2 | YPDcl3 | EtOHcl1 | EtOHcl2 | Galcl1 | YPDnc1 | YPDnc2 | YPDnc3 | YPDnc4 | EtOHnc1 | EtOHnc2 | Galnc1 | Galnc2 |
| 13 | SWI6  | YLR182W   | YPDcl2 | YPDcl3 | EtOHcl1 | EtOHcl2 | Galcl1 | YPDnc1 | YPDnc2 | YPDnc3 | YPDnc4 | EtOHnc1 | EtOHnc2 | Galnc1 | Galnc2 |
| 13 | CDC15 | YAR019C   | YPDcl2 | YPDcl3 | EtOHcl1 | EtOHcl2 | Galcl1 | YPDnc1 | YPDnc2 | YPDnc3 | YPDnc4 | EtOHnc1 | EtOHnc2 | Galnc1 | Galnc2 |
| 13 | TOM70 | YNL121C   | YPDcl2 | YPDcl3 | EtOHcl1 | EtOHcl2 | Galcl1 | YPDnc1 | YPDnc2 | YPDnc3 | YPDnc4 | EtOHnc1 | EtOHnc2 | Galnc1 | Galnc2 |
| 13 | PSE1  | YMR308C   | YPDcl2 | YPDcl3 | EtOHcl1 | EtOHcl2 | Galcl1 | YPDnc1 | YPDnc2 | YPDnc3 | YPDnc4 | EtOHnc1 | EtOHnc2 | Galnc1 | Galnc2 |
| 13 | ECM17 | YJR137C   | YPDcl2 | YPDcl3 | EtOHcl1 | EtOHcl2 | Galcl1 | YPDnc1 | YPDnc2 | YPDnc3 | YPDnc4 | EtOHnc1 | EtOHnc2 | Galnc1 | Galnc2 |
| 13 | NIP1  | YMR309C   | YPDcl2 | YPDcl3 | EtOHcl1 | EtOHcl2 | Galcl1 | YPDnc1 | YPDnc2 | YPDnc3 | YPDnc4 | EtOHnc1 | EtOHnc2 | Galnc1 | Galnc2 |
| 13 | ALD2  | YMR170C   | YPDcl2 | YPDcl3 | EtOHcl1 | EtOHcl2 | Galcl1 | YPDnc1 | YPDnc2 | YPDnc3 | YPDnc4 | EtOHnc1 | EtOHnc2 | Galnc1 | Galnc2 |
| 13 | NHP2  | YDL208W   | YPDcl2 | YPDcl3 | EtOHcl1 | EtOHcl2 | Galcl1 | YPDnc1 | YPDnc2 | YPDnc3 | YPDnc4 | EtOHnc1 | EtOHnc2 | Galnc1 | Galnc2 |
| 13 | KTR1  | YOR099W   | YPDcl2 | YPDcl3 | EtOHcl1 | EtOHcl2 | Galcl1 | YPDnc1 | YPDnc2 | YPDnc3 | YPDnc4 | EtOHnc1 | EtOHnc2 | Galnc1 | Galnc2 |
| 13 | PTA1  | YAL043C   | YPDcl2 | YPDcl3 | EtOHcl1 | EtOHcl2 | Galcl1 | YPDnc1 | YPDnc2 | YPDnc3 | YPDnc4 | EtOHnc1 | EtOHnc2 | Galnc1 | Galnc2 |
| 13 |       | YBR028C   | YPDcl2 | YPDcl3 | EtOHcl1 | EtOHcl2 | Galcl1 | YPDnc1 | YPDnc2 | YPDnc3 | YPDnc4 | EtOHnc1 | EtOHnc2 | Galnc1 | Galnc2 |
| 13 | LAP4  | YKL103C   | YPDcl2 | YPDcl3 | EtOHcl1 | EtOHcl2 | Galcl1 | YPDnc1 | YPDnc2 | YPDnc3 | YPDnc4 | EtOHnc1 | EtOHnc2 | Galnc1 | Galnc2 |
| 13 | CNM67 | YNL225C   | YPDcl2 | YPDcl3 | EtOHcl1 | EtOHcl2 | Galcl1 | YPDnc1 | YPDnc2 | YPDnc3 | YPDnc4 | EtOHnc1 | EtOHnc2 | Galnc1 | Galnc2 |
| 13 | SPT8  | YLR055C   | YPDcl2 | YPDcl3 | EtOHcl1 | EtOHcl2 | Galcl1 | YPDnc1 | YPDnc2 | YPDnc3 | YPDnc4 | EtOHnc1 | EtOHnc2 | Galnc1 | Galnc2 |
| 13 |       | YPR074W-  | YPDcl2 | YPDcl3 | EtOHcl1 | EtOHcl2 | Galcl1 | YPDnc1 | YPDnc2 | YPDnc3 | YPDnc4 | EtOHnc1 | EtOHnc2 | Galnc1 | Galnc2 |
| 13 | ATP17 | YDR377W   | YPDcl2 | YPDcl3 | EtOHcl1 | EtOHcl2 | Galcl1 | YPDnc1 | YPDnc2 | YPDnc3 | YPDnc4 | EtOHnc1 | EtOHnc2 | Galnc1 | Galnc2 |
| 13 | VPS60 | YDR486C   | YPDcl2 | YPDcl3 | EtOHcl1 | EtOHcl2 | Galcl1 | YPDnc1 | YPDnc2 | YPDnc3 | YPDnc4 | EtOHnc1 | EtOHnc2 | Galnc1 | Galnc2 |
| 13 | DMA1  | YHR115C   | YPDcl2 | YPDcl3 | EtOHcl1 | EtOHcl2 | Galcl1 | YPDnc1 | YPDnc2 | YPDnc3 | YPDnc4 | EtOHnc1 | EtOHnc2 | Galnc1 | Galnc2 |
| 13 | TFC8  | YPL007C   | YPDcl2 | YPDcl3 | EtOHcl1 | EtOHcl2 | Galcl1 | YPDnc1 | YPDnc2 | YPDnc3 | YPDnc4 | EtOHnc1 | EtOHnc2 | Galnc1 | Galnc2 |
| 13 |       | YDR248C   | YPDcl2 | YPDcl3 | EtOHcl1 | EtOHcl2 | Galcl1 | YPDnc1 | YPDnc2 | YPDnc3 | YPDnc4 | EtOHnc1 | EtOHnc2 | Galnc1 | Galnc2 |
| 13 |       | YHL037C   | YPDcl2 | YPDcl3 | EtOHcl1 | EtOHcl2 | Galcl1 | YPDnc1 | YPDnc2 | YPDnc3 | YPDnc4 | EtOHnc1 | EtOHnc2 | Galnc1 | Galnc2 |

|           |         |        |        |         |         |        |        |        |        |        |         |         |        |        |
|-----------|---------|--------|--------|---------|---------|--------|--------|--------|--------|--------|---------|---------|--------|--------|
| 13 SRO7   | YPR032W | YPDcl2 | YPDcl3 | EtOHcl1 | EtOHcl2 | Galcl1 | YPDnc1 | YPDnc2 | YPDnc3 | YPDnc4 | EtOHnc1 | EtOHnc2 | Galnc1 | Galnc2 |
| 13 RFA3   | YJL173C | YPDcl2 | YPDcl3 | EtOHcl1 | EtOHcl2 | Galcl1 | YPDnc1 | YPDnc2 | YPDnc3 | YPDnc4 | EtOHnc1 | EtOHnc2 | Galnc1 | Galnc2 |
| 13        | YOR114W | YPDcl2 | YPDcl3 | EtOHcl1 | EtOHcl2 | Galcl1 | YPDnc1 | YPDnc2 | YPDnc3 | YPDnc4 | EtOHnc1 | EtOHnc2 | Galnc1 | Galnc2 |
| 13 ESF2   | YNR054C | YPDcl2 | YPDcl3 | EtOHcl1 | EtOHcl2 | Galcl1 | YPDnc1 | YPDnc2 | YPDnc3 | YPDnc4 | EtOHnc1 | EtOHnc2 | Galnc1 | Galnc2 |
| 13 IMG2   | YCR071C | YPDcl2 | YPDcl3 | EtOHcl1 | EtOHcl2 | Galcl1 | YPDnc1 | YPDnc2 | YPDnc3 | YPDnc4 | EtOHnc1 | EtOHnc2 | Galnc1 | Galnc2 |
| 13 AIM46  | YHR199C | YPDcl2 | YPDcl3 | EtOHcl1 | EtOHcl2 | Galcl1 | YPDnc1 | YPDnc2 | YPDnc3 | YPDnc4 | EtOHnc1 | EtOHnc2 | Galnc1 | Galnc2 |
| 13 INO4   | YOL108C | YPDcl2 | YPDcl3 | EtOHcl1 | EtOHcl2 | Galcl1 | YPDnc1 | YPDnc2 | YPDnc3 | YPDnc4 | EtOHnc1 | EtOHnc2 | Galnc1 | Galnc2 |
| 13 RTT107 | YHR154W | YPDcl2 | YPDcl3 | EtOHcl1 | EtOHcl2 | Galcl1 | YPDnc1 | YPDnc2 | YPDnc3 | YPDnc4 | EtOHnc1 | EtOHnc2 | Galnc1 | Galnc2 |
| 13 RRF1   | YHR038W | YPDcl2 | YPDcl3 | EtOHcl1 | EtOHcl2 | Galcl1 | YPDnc1 | YPDnc2 | YPDnc3 | YPDnc4 | EtOHnc1 | EtOHnc2 | Galnc1 | Galnc2 |
| 13 PDE2   | YOR360C | YPDcl2 | YPDcl3 | EtOHcl1 | EtOHcl2 | Galcl1 | YPDnc1 | YPDnc2 | YPDnc3 | YPDnc4 | EtOHnc1 | EtOHnc2 | Galnc1 | Galnc2 |
| 13 ASI3   | YNL008C | YPDcl2 | YPDcl3 | EtOHcl1 | EtOHcl2 | Galcl1 | YPDnc1 | YPDnc2 | YPDnc3 | YPDnc4 | EtOHnc1 | EtOHnc2 | Galnc1 | Galnc2 |
| 13        | YOR309C | YPDcl2 | YPDcl3 | EtOHcl1 | EtOHcl2 | Galcl1 | YPDnc1 | YPDnc2 | YPDnc3 | YPDnc4 | EtOHnc1 | EtOHnc2 | Galnc1 | Galnc2 |
| 13 YET1   | YKL065C | YPDcl2 | YPDcl3 | EtOHcl1 | EtOHcl2 | Galcl1 | YPDnc1 | YPDnc2 | YPDnc3 | YPDnc4 | EtOHnc1 | EtOHnc2 | Galnc1 | Galnc2 |
| 13 SPP2   | YOR148C | YPDcl2 | YPDcl3 | EtOHcl1 | EtOHcl2 | Galcl1 | YPDnc1 | YPDnc2 | YPDnc3 | YPDnc4 | EtOHnc1 | EtOHnc2 | Galnc1 | Galnc2 |
| 13 CDC6   | YJL194W | YPDcl2 | YPDcl3 | EtOHcl1 | EtOHcl2 | Galcl1 | YPDnc1 | YPDnc2 | YPDnc3 | YPDnc4 | EtOHnc1 | EtOHnc2 | Galnc1 | Galnc2 |
| 13 RPN1   | YHR027C | YPDcl2 | YPDcl3 | EtOHcl1 | EtOHcl2 | Galcl1 | YPDnc1 | YPDnc2 | YPDnc3 | YPDnc4 | EtOHnc1 | EtOHnc2 | Galnc1 | Galnc2 |
| 13 TRK2   | YKR050W | YPDcl2 | YPDcl3 | EtOHcl1 | EtOHcl2 | Galcl1 | YPDnc1 | YPDnc2 | YPDnc3 | YPDnc4 | EtOHnc1 | EtOHnc2 | Galnc1 | Galnc2 |
| 13        | YCR090C | YPDcl2 | YPDcl3 | EtOHcl1 | EtOHcl2 | Galcl1 | YPDnc1 | YPDnc2 | YPDnc3 | YPDnc4 | EtOHnc1 | EtOHnc2 | Galnc1 | Galnc2 |
| 13 CEP3   | YMR168C | YPDcl2 | YPDcl3 | EtOHcl1 | EtOHcl2 | Galcl1 | YPDnc1 | YPDnc2 | YPDnc3 | YPDnc4 | EtOHnc1 | EtOHnc2 | Galnc1 | Galnc2 |
| 13 TVP23  | YDR084C | YPDcl2 | YPDcl3 | EtOHcl1 | EtOHcl2 | Galcl1 | YPDnc1 | YPDnc2 | YPDnc3 | YPDnc4 | EtOHnc1 | EtOHnc2 | Galnc1 | Galnc2 |
| 13 RTG2   | YGL252C | YPDcl2 | YPDcl3 | EtOHcl1 | EtOHcl2 | Galcl1 | YPDnc1 | YPDnc2 | YPDnc3 | YPDnc4 | EtOHnc1 | EtOHnc2 | Galnc1 | Galnc2 |
| 13 NIF3   | YGL221C | YPDcl2 | YPDcl3 | EtOHcl1 | EtOHcl2 | Galcl1 | YPDnc1 | YPDnc2 | YPDnc3 | YPDnc4 | EtOHnc1 | EtOHnc2 | Galnc1 | Galnc2 |
| 13 APN1   | YKL114C | YPDcl2 | YPDcl3 | EtOHcl1 | EtOHcl2 | Galcl1 | YPDnc1 | YPDnc2 | YPDnc3 | YPDnc4 | EtOHnc1 | EtOHnc2 | Galnc1 | Galnc2 |
| 13        | YJR020W | YPDcl2 | YPDcl3 | EtOHcl1 | EtOHcl2 | Galcl1 | YPDnc1 | YPDnc2 | YPDnc3 | YPDnc4 | EtOHnc1 | EtOHnc2 | Galnc1 | Galnc2 |
| 13 FMP30  | YPL103C | YPDcl2 | YPDcl3 | EtOHcl1 | EtOHcl2 | Galcl1 | YPDnc1 | YPDnc2 | YPDnc3 | YPDnc4 | EtOHnc1 | EtOHnc2 | Galnc1 | Galnc2 |
| 13 OSM1   | YJR051W | YPDcl2 | YPDcl3 | EtOHcl1 | EtOHcl2 | Galcl1 | YPDnc1 | YPDnc2 | YPDnc3 | YPDnc4 | EtOHnc1 | EtOHnc2 | Galnc1 | Galnc2 |
| 13 BUL1   | YMR275C | YPDcl2 | YPDcl3 | EtOHcl1 | EtOHcl2 | Galcl1 | YPDnc1 | YPDnc2 | YPDnc3 | YPDnc4 | EtOHnc1 | EtOHnc2 | Galnc1 | Galnc2 |
| 13 VPS25  | YJR102C | YPDcl2 | YPDcl3 | EtOHcl1 | EtOHcl2 | Galcl1 | YPDnc1 | YPDnc2 | YPDnc3 | YPDnc4 | EtOHnc1 | EtOHnc2 | Galnc1 | Galnc2 |
| 13        | YLR428C | YPDcl2 | YPDcl3 | EtOHcl1 | EtOHcl2 | Galcl1 | YPDnc1 | YPDnc2 | YPDnc3 | YPDnc4 | EtOHnc1 | EtOHnc2 | Galnc1 | Galnc2 |
| 13 RPL23B | YER117W | YPDcl2 | YPDcl3 | EtOHcl1 | EtOHcl2 | Galcl1 | YPDnc1 | YPDnc2 | YPDnc3 | YPDnc4 | EtOHnc1 | EtOHnc2 | Galnc1 | Galnc2 |
| 13 TBF1   | YPL128C | YPDcl2 | YPDcl3 | EtOHcl1 | EtOHcl2 | Galcl1 | YPDnc1 | YPDnc2 | YPDnc3 | YPDnc4 | EtOHnc1 | EtOHnc2 | Galnc1 | Galnc2 |
| 13 HOC1   | YJR075W | YPDcl2 | YPDcl3 | EtOHcl1 | EtOHcl2 | Galcl1 | YPDnc1 | YPDnc2 | YPDnc3 | YPDnc4 | EtOHnc1 | EtOHnc2 | Galnc1 | Galnc2 |
| 13 NAT2   | YGR147C | YPDcl2 | YPDcl3 | EtOHcl1 | EtOHcl2 | Galcl1 | YPDnc1 | YPDnc2 | YPDnc3 | YPDnc4 | EtOHnc1 | EtOHnc2 | Galnc1 | Galnc2 |
| 13 UTP21  | YLR409C | YPDcl2 | YPDcl3 | EtOHcl1 | EtOHcl2 | Galcl1 | YPDnc1 | YPDnc2 | YPDnc3 | YPDnc4 | EtOHnc1 | EtOHnc2 | Galnc1 | Galnc2 |



|            |           |        |        |         |         |        |        |        |        |        |         |         |        |        |
|------------|-----------|--------|--------|---------|---------|--------|--------|--------|--------|--------|---------|---------|--------|--------|
| 13 HEM15   | YOR176W   | YPDcl2 | YPDcl3 | EtOHcl1 | EtOHcl2 | Galcl1 | YPDnc1 | YPDnc2 | YPDnc3 | YPDnc4 | EtOHnc1 | EtOHnc2 | Galnc1 | Galnc2 |
| 13 DPB4    | YDR121W   | YPDcl2 | YPDcl3 | EtOHcl1 | EtOHcl2 | Galcl1 | YPDnc1 | YPDnc2 | YPDnc3 | YPDnc4 | EtOHnc1 | EtOHnc2 | Galnc1 | Galnc2 |
| 13         | YNL190W   | YPDcl2 | YPDcl3 | EtOHcl1 | EtOHcl2 | Galcl1 | YPDnc1 | YPDnc2 | YPDnc3 | YPDnc4 | EtOHnc1 | EtOHnc2 | Galnc1 | Galnc2 |
| 13 IRA2    | YOL081W   | YPDcl2 | YPDcl3 | EtOHcl1 | EtOHcl2 | Galcl1 | YPDnc1 | YPDnc2 | YPDnc3 | YPDnc4 | EtOHnc1 | EtOHnc2 | Galnc1 | Galnc2 |
| 13         | YKL050C   | YPDcl2 | YPDcl3 | EtOHcl1 | EtOHcl2 | Galcl1 | YPDnc1 | YPDnc2 | YPDnc3 | YPDnc4 | EtOHnc1 | EtOHnc2 | Galnc1 | Galnc2 |
| 13 RTN2    | YDL204W   | YPDcl2 | YPDcl3 | EtOHcl1 | EtOHcl2 | Galcl1 | YPDnc1 | YPDnc2 | YPDnc3 | YPDnc4 | EtOHnc1 | EtOHnc2 | Galnc1 | Galnc2 |
| 13 CSM3    | YMR048W   | YPDcl2 | YPDcl3 | EtOHcl1 | EtOHcl2 | Galcl1 | YPDnc1 | YPDnc2 | YPDnc3 | YPDnc4 | EtOHnc1 | EtOHnc2 | Galnc1 | Galnc2 |
| 13 PLB3    | YOL011W   | YPDcl2 | YPDcl3 | EtOHcl1 | EtOHcl2 | Galcl1 | YPDnc1 | YPDnc2 | YPDnc3 | YPDnc4 | EtOHnc1 | EtOHnc2 | Galnc1 | Galnc2 |
| 13 SMC5    | YOL034W   | YPDcl2 | YPDcl3 | EtOHcl1 | EtOHcl2 | Galcl1 | YPDnc1 | YPDnc2 | YPDnc3 | YPDnc4 | EtOHnc1 | EtOHnc2 | Galnc1 | Galnc2 |
| 13 MDL1    | YLR188W   | YPDcl2 | YPDcl3 | EtOHcl1 | EtOHcl2 | Galcl1 | YPDnc1 | YPDnc2 | YPDnc3 | YPDnc4 | EtOHnc1 | EtOHnc2 | Galnc1 | Galnc2 |
| 13 TOR1    | YJR066W   | YPDcl2 | YPDcl3 | EtOHcl1 | EtOHcl2 | Galcl1 | YPDnc1 | YPDnc2 | YPDnc3 | YPDnc4 | EtOHnc1 | EtOHnc2 | Galnc1 | Galnc2 |
| 13         | YCR050C   | YPDcl2 | YPDcl3 | EtOHcl1 | EtOHcl2 | Galcl1 | YPDnc1 | YPDnc2 | YPDnc3 | YPDnc4 | EtOHnc1 | EtOHnc2 | Galnc1 | Galnc2 |
| 13 MRP21   | YBL090W   | YPDcl2 | YPDcl3 | EtOHcl1 | EtOHcl2 | Galcl1 | YPDnc1 | YPDnc2 | YPDnc3 | YPDnc4 | EtOHnc1 | EtOHnc2 | Galnc1 | Galnc2 |
| 13 UME1    | YPL139C   | YPDcl2 | YPDcl3 | EtOHcl1 | EtOHcl2 | Galcl1 | YPDnc1 | YPDnc2 | YPDnc3 | YPDnc4 | EtOHnc1 | EtOHnc2 | Galnc1 | Galnc2 |
| 13 COS111  | YBR203W   | YPDcl2 | YPDcl3 | EtOHcl1 | EtOHcl2 | Galcl1 | YPDnc1 | YPDnc2 | YPDnc3 | YPDnc4 | EtOHnc1 | EtOHnc2 | Galnc1 | Galnc2 |
| 13 CLB6    | YGR109C   | YPDcl2 | YPDcl3 | EtOHcl1 | EtOHcl2 | Galcl1 | YPDnc1 | YPDnc2 | YPDnc3 | YPDnc4 | EtOHnc1 | EtOHnc2 | Galnc1 | Galnc2 |
| 13 VPS8    | YAL002W   | YPDcl2 | YPDcl3 | EtOHcl1 | EtOHcl2 | Galcl1 | YPDnc1 | YPDnc2 | YPDnc3 | YPDnc4 | EtOHnc1 | EtOHnc2 | Galnc1 | Galnc2 |
| 13         | YKL165C-A | YPDcl2 | YPDcl3 | EtOHcl1 | EtOHcl2 | Galcl1 | YPDnc1 | YPDnc2 | YPDnc3 | YPDnc4 | EtOHnc1 | EtOHnc2 | Galnc1 | Galnc2 |
| 13 COQ6    | YGR255C   | YPDcl2 | YPDcl3 | EtOHcl1 | EtOHcl2 | Galcl1 | YPDnc1 | YPDnc2 | YPDnc3 | YPDnc4 | EtOHnc1 | EtOHnc2 | Galnc1 | Galnc2 |
| 13 RPL40B  | YKR094C   | YPDcl2 | YPDcl3 | EtOHcl1 | EtOHcl2 | Galcl1 | YPDnc1 | YPDnc2 | YPDnc3 | YPDnc4 | EtOHnc1 | EtOHnc2 | Galnc1 | Galnc2 |
| 13 TMT1    | YER175C   | YPDcl2 | YPDcl3 | EtOHcl1 | EtOHcl2 | Galcl1 | YPDnc1 | YPDnc2 | YPDnc3 | YPDnc4 | EtOHnc1 | EtOHnc2 | Galnc1 | Galnc2 |
| 13 AVT2    | YEL064C   | YPDcl2 | YPDcl3 | EtOHcl1 | EtOHcl2 | Galcl1 | YPDnc1 | YPDnc2 | YPDnc3 | YPDnc4 | EtOHnc1 | EtOHnc2 | Galnc1 | Galnc2 |
| 13 TPO3    | YPR156C   | YPDcl2 | YPDcl3 | EtOHcl1 | EtOHcl2 | Galcl1 | YPDnc1 | YPDnc2 | YPDnc3 | YPDnc4 | EtOHnc1 | EtOHnc2 | Galnc1 | Galnc2 |
| 13 YSP3    | YOR003W   | YPDcl2 | YPDcl3 | EtOHcl1 | EtOHcl2 | Galcl1 | YPDnc1 | YPDnc2 | YPDnc3 | YPDnc4 | EtOHnc1 | EtOHnc2 | Galnc1 | Galnc2 |
| 13 ARC35   | YNR035C   | YPDcl2 | YPDcl3 | EtOHcl1 | EtOHcl2 | Galcl1 | YPDnc1 | YPDnc2 | YPDnc3 | YPDnc4 | EtOHnc1 | EtOHnc2 | Galnc1 | Galnc2 |
| 13 MGE1    | YOR232W   | YPDcl2 | YPDcl3 | EtOHcl1 | EtOHcl2 | Galcl1 | YPDnc1 | YPDnc2 | YPDnc3 | YPDnc4 | EtOHnc1 | EtOHnc2 | Galnc1 | Galnc2 |
| 13 AIP1    | YMR092C   | YPDcl2 | YPDcl3 | EtOHcl1 | EtOHcl2 | Galcl1 | YPDnc1 | YPDnc2 | YPDnc3 | YPDnc4 | EtOHnc1 | EtOHnc2 | Galnc1 | Galnc2 |
| 13 MFA1    | YDR461W   | YPDcl2 | YPDcl3 | EtOHcl1 | EtOHcl2 | Galcl1 | YPDnc1 | YPDnc2 | YPDnc3 | YPDnc4 | EtOHnc1 | EtOHnc2 | Galnc1 | Galnc2 |
| 13 TIF4631 | YGR162W   | YPDcl2 | YPDcl3 | EtOHcl1 | EtOHcl2 | Galcl1 | YPDnc1 | YPDnc2 | YPDnc3 | YPDnc4 | EtOHnc1 | EtOHnc2 | Galnc1 | Galnc2 |
| 13 IDP1    | YDL066W   | YPDcl2 | YPDcl3 | EtOHcl1 | EtOHcl2 | Galcl1 | YPDnc1 | YPDnc2 | YPDnc3 | YPDnc4 | EtOHnc1 | EtOHnc2 | Galnc1 | Galnc2 |
| 13 RPB9    | YGL070C   | YPDcl2 | YPDcl3 | EtOHcl1 | EtOHcl2 | Galcl1 | YPDnc1 | YPDnc2 | YPDnc3 | YPDnc4 | EtOHnc1 | EtOHnc2 | Galnc1 | Galnc2 |
| 13 HSM3    | YBR272C   | YPDcl2 | YPDcl3 | EtOHcl1 | EtOHcl2 | Galcl1 | YPDnc1 | YPDnc2 | YPDnc3 | YPDnc4 | EtOHnc1 | EtOHnc2 | Galnc1 | Galnc2 |
| 13 RRP42   | YDL111C   | YPDcl2 | YPDcl3 | EtOHcl1 | EtOHcl2 | Galcl1 | YPDnc1 | YPDnc2 | YPDnc3 | YPDnc4 | EtOHnc1 | EtOHnc2 | Galnc1 | Galnc2 |
| 13 RLF2    | YPR018W   | YPDcl2 | YPDcl3 | EtOHcl1 | EtOHcl2 | Galcl1 | YPDnc1 | YPDnc2 | YPDnc3 | YPDnc4 | EtOHnc1 | EtOHnc2 | Galnc1 | Galnc2 |

|           |          |        |        |         |         |        |        |        |        |        |         |         |        |        |
|-----------|----------|--------|--------|---------|---------|--------|--------|--------|--------|--------|---------|---------|--------|--------|
| 13 PHA2   | YNL316C  | YPDcl2 | YPDcl3 | EtOHcl1 | EtOHcl2 | Galcl1 | YPDnc1 | YPDnc2 | YPDnc3 | YPDnc4 | EtOHnc1 | EtOHnc2 | Galnc1 | Galnc2 |
| 13 RTS3   | YGR161C  | YPDcl2 | YPDcl3 | EtOHcl1 | EtOHcl2 | Galcl1 | YPDnc1 | YPDnc2 | YPDnc3 | YPDnc4 | EtOHnc1 | EtOHnc2 | Galnc1 | Galnc2 |
| 13 KKQ8   | YKL168C  | YPDcl2 | YPDcl3 | EtOHcl1 | EtOHcl2 | Galcl1 | YPDnc1 | YPDnc2 | YPDnc3 | YPDnc4 | EtOHnc1 | EtOHnc2 | Galnc1 | Galnc2 |
| 13 AVO2   | YMR068W  | YPDcl2 | YPDcl3 | EtOHcl1 | EtOHcl2 | Galcl1 | YPDnc1 | YPDnc2 | YPDnc3 | YPDnc4 | EtOHnc1 | EtOHnc2 | Galnc1 | Galnc2 |
| 13        | YDR476C  | YPDcl2 | YPDcl3 | EtOHcl1 | EtOHcl2 | Galcl1 | YPDnc1 | YPDnc2 | YPDnc3 | YPDnc4 | EtOHnc1 | EtOHnc2 | Galnc1 | Galnc2 |
| 13        | YGL165C  | YPDcl2 | YPDcl3 | EtOHcl1 | EtOHcl2 | Galcl1 | YPDnc1 | YPDnc2 | YPDnc3 | YPDnc4 | EtOHnc1 | EtOHnc2 | Galnc1 | Galnc2 |
| 13        | YPL272C  | YPDcl2 | YPDcl3 | EtOHcl1 | EtOHcl2 | Galcl1 | YPDnc1 | YPDnc2 | YPDnc3 | YPDnc4 | EtOHnc1 | EtOHnc2 | Galnc1 | Galnc2 |
| 13        | YHR080C  | YPDcl2 | YPDcl3 | EtOHcl1 | EtOHcl2 | Galcl1 | YPDnc1 | YPDnc2 | YPDnc3 | YPDnc4 | EtOHnc1 | EtOHnc2 | Galnc1 | Galnc2 |
| 13 ATG20  | YDL113C  | YPDcl2 | YPDcl3 | EtOHcl1 | EtOHcl2 | Galcl1 | YPDnc1 | YPDnc2 | YPDnc3 | YPDnc4 | EtOHnc1 | EtOHnc2 | Galnc1 | Galnc2 |
| 13        | YBL086C  | YPDcl2 | YPDcl3 | EtOHcl1 | EtOHcl2 | Galcl1 | YPDnc1 | YPDnc2 | YPDnc3 | YPDnc4 | EtOHnc1 | EtOHnc2 | Galnc1 | Galnc2 |
| 13 PMC1   | YGL006W  | YPDcl2 | YPDcl3 | EtOHcl1 | EtOHcl2 | Galcl1 | YPDnc1 | YPDnc2 | YPDnc3 | YPDnc4 | EtOHnc1 | EtOHnc2 | Galnc1 | Galnc2 |
| 13        | YMR007W  | YPDcl2 | YPDcl3 | EtOHcl1 | EtOHcl2 | Galcl1 | YPDnc1 | YPDnc2 | YPDnc3 | YPDnc4 | EtOHnc1 | EtOHnc2 | Galnc1 | Galnc2 |
| 13 ULI1   | YFR026C  | YPDcl2 | YPDcl3 | EtOHcl1 | EtOHcl2 | Galcl1 | YPDnc1 | YPDnc2 | YPDnc3 | YPDnc4 | EtOHnc1 | EtOHnc2 | Galnc1 | Galnc2 |
| 13 SET1   | YHR119W  | YPDcl2 | YPDcl3 | EtOHcl1 | EtOHcl2 | Galcl1 | YPDnc1 | YPDnc2 | YPDnc3 | YPDnc4 | EtOHnc1 | EtOHnc2 | Galnc1 | Galnc2 |
| 13 AIM33  | YML087C  | YPDcl2 | YPDcl3 | EtOHcl1 | EtOHcl2 | Galcl1 | YPDnc1 | YPDnc2 | YPDnc3 | YPDnc4 | EtOHnc1 | EtOHnc2 | Galnc1 | Galnc2 |
| 13 MRPL44 | YMR225C  | YPDcl2 | YPDcl3 | EtOHcl1 | EtOHcl2 | Galcl1 | YPDnc1 | YPDnc2 | YPDnc3 | YPDnc4 | EtOHnc1 | EtOHnc2 | Galnc1 | Galnc2 |
| 13 TPT1   | YOL102C  | YPDcl2 | YPDcl3 | EtOHcl1 | EtOHcl2 | Galcl1 | YPDnc1 | YPDnc2 | YPDnc3 | YPDnc4 | EtOHnc1 | EtOHnc2 | Galnc1 | Galnc2 |
| 13 SSE2   | YBR169C  | YPDcl2 | YPDcl3 | EtOHcl1 | EtOHcl2 | Galcl1 | YPDnc1 | YPDnc2 | YPDnc3 | YPDnc4 | EtOHnc1 | EtOHnc2 | Galnc1 | Galnc2 |
| 13 FAB1   | YFR019W  | YPDcl2 | YPDcl3 | EtOHcl1 | EtOHcl2 | Galcl1 | YPDnc1 | YPDnc2 | YPDnc3 | YPDnc4 | EtOHnc1 | EtOHnc2 | Galnc1 | Galnc2 |
| 13        | YBR126W- | YPDcl2 | YPDcl3 | EtOHcl1 | EtOHcl2 | Galcl1 | YPDnc1 | YPDnc2 | YPDnc3 | YPDnc4 | EtOHnc1 | EtOHnc2 | Galnc1 | Galnc2 |
| 13 PGC1   | YPL206C  | YPDcl2 | YPDcl3 | EtOHcl1 | EtOHcl2 | Galcl1 | YPDnc1 | YPDnc2 | YPDnc3 | YPDnc4 | EtOHnc1 | EtOHnc2 | Galnc1 | Galnc2 |
| 13 ASG7   | YJL170C  | YPDcl2 | YPDcl3 | EtOHcl1 | EtOHcl2 | Galcl1 | YPDnc1 | YPDnc2 | YPDnc3 | YPDnc4 | EtOHnc1 | EtOHnc2 | Galnc1 | Galnc2 |
| 13        | YKR073C  | YPDcl2 | YPDcl3 | EtOHcl1 | EtOHcl2 | Galcl1 | YPDnc1 | YPDnc2 | YPDnc3 | YPDnc4 | EtOHnc1 | EtOHnc2 | Galnc1 | Galnc2 |
| 13 KRE1   | YNL322C  | YPDcl2 | YPDcl3 | EtOHcl1 | EtOHcl2 | Galcl1 | YPDnc1 | YPDnc2 | YPDnc3 | YPDnc4 | EtOHnc1 | EtOHnc2 | Galnc1 | Galnc2 |
| 13        | YBL100W- | YPDcl2 | YPDcl3 | EtOHcl1 | EtOHcl2 | Galcl1 | YPDnc1 | YPDnc2 | YPDnc3 | YPDnc4 | EtOHnc1 | EtOHnc2 | Galnc1 | Galnc2 |
| 13 YSP1   | YHR155W  | YPDcl2 | YPDcl3 | EtOHcl1 | EtOHcl2 | Galcl1 | YPDnc1 | YPDnc2 | YPDnc3 | YPDnc4 | EtOHnc1 | EtOHnc2 | Galnc1 | Galnc2 |
| 13 MVD1   | YNR043W  | YPDcl2 | YPDcl3 | EtOHcl1 | EtOHcl2 | Galcl1 | YPDnc1 | YPDnc2 | YPDnc3 | YPDnc4 | EtOHnc1 | EtOHnc2 | Galnc1 | Galnc2 |
| 13        | YBR223W- | YPDcl2 | YPDcl3 | EtOHcl1 | EtOHcl2 | Galcl1 | YPDnc1 | YPDnc2 | YPDnc3 | YPDnc4 | EtOHnc1 | EtOHnc2 | Galnc1 | Galnc2 |
| 13 EMP70  | YLR083C  | YPDcl2 | YPDcl3 | EtOHcl1 | EtOHcl2 | Galcl1 | YPDnc1 | YPDnc2 | YPDnc3 | YPDnc4 | EtOHnc1 | EtOHnc2 | Galnc1 | Galnc2 |
| 13 TOM20  | YGR082W  | YPDcl2 | YPDcl3 | EtOHcl1 | EtOHcl2 | Galcl1 | YPDnc1 | YPDnc2 | YPDnc3 | YPDnc4 | EtOHnc1 | EtOHnc2 | Galnc1 | Galnc2 |
| 13 SPO16  | YHR153C  | YPDcl2 | YPDcl3 | EtOHcl1 | EtOHcl2 | Galcl1 | YPDnc1 | YPDnc2 | YPDnc3 | YPDnc4 | EtOHnc1 | EtOHnc2 | Galnc1 | Galnc2 |
| 13 RHO4   | YKR055W  | YPDcl2 | YPDcl3 | EtOHcl1 | EtOHcl2 | Galcl1 | YPDnc1 | YPDnc2 | YPDnc3 | YPDnc4 | EtOHnc1 | EtOHnc2 | Galnc1 | Galnc2 |
| 13 SKN7   | YHR206W  | YPDcl2 | YPDcl3 | EtOHcl1 | EtOHcl2 | Galcl1 | YPDnc1 | YPDnc2 | YPDnc3 | YPDnc4 | EtOHnc1 | EtOHnc2 | Galnc1 | Galnc2 |
| 13 RPS6A  | YPL090C  | YPDcl2 | YPDcl3 | EtOHcl1 | EtOHcl2 | Galcl1 | YPDnc1 | YPDnc2 | YPDnc3 | YPDnc4 | EtOHnc1 | EtOHnc2 | Galnc1 | Galnc2 |

|    |         |           |        |         |         |         |        |        |        |        |         |         |         |        |        |
|----|---------|-----------|--------|---------|---------|---------|--------|--------|--------|--------|---------|---------|---------|--------|--------|
| 13 | YLR132C | YPDcl2    | YPDcl3 | EtOHcl1 | EtOHcl2 | Galcl1  | YPDnc1 | YPDnc2 | YPDnc3 | YPDnc4 | EtOHnc1 | EtOHnc2 | Galnc1  | Galnc2 |        |
| 13 | SSN8    | YNL025C   | YPDcl2 | YPDcl3  | EtOHcl1 | EtOHcl2 | Galcl1 | YPDnc1 | YPDnc2 | YPDnc3 | YPDnc4  | EtOHnc1 | EtOHnc2 | Galnc1 | Galnc2 |
| 13 | PRR2    | YDL214C   | YPDcl2 | YPDcl3  | EtOHcl1 | EtOHcl2 | Galcl1 | YPDnc1 | YPDnc2 | YPDnc3 | YPDnc4  | EtOHnc1 | EtOHnc2 | Galnc1 | Galnc2 |
| 13 | ALG3    | YBL082C   | YPDcl2 | YPDcl3  | EtOHcl1 | EtOHcl2 | Galcl1 | YPDnc1 | YPDnc2 | YPDnc3 | YPDnc4  | EtOHnc1 | EtOHnc2 | Galnc1 | Galnc2 |
| 13 | NUP145  | YGL092W   | YPDcl2 | YPDcl3  | EtOHcl1 | EtOHcl2 | Galcl1 | YPDnc1 | YPDnc2 | YPDnc3 | YPDnc4  | EtOHnc1 | EtOHnc2 | Galnc1 | Galnc2 |
| 13 |         | YGL159W   | YPDcl2 | YPDcl3  | EtOHcl1 | EtOHcl2 | Galcl1 | YPDnc1 | YPDnc2 | YPDnc3 | YPDnc4  | EtOHnc1 | EtOHnc2 | Galnc1 | Galnc2 |
| 13 | RBA50   | YDR527W   | YPDcl2 | YPDcl3  | EtOHcl1 | EtOHcl2 | Galcl1 | YPDnc1 | YPDnc2 | YPDnc3 | YPDnc4  | EtOHnc1 | EtOHnc2 | Galnc1 | Galnc2 |
| 13 | PHO5    | YBR093C   | YPDcl2 | YPDcl3  | EtOHcl1 | EtOHcl2 | Galcl1 | YPDnc1 | YPDnc2 | YPDnc3 | YPDnc4  | EtOHnc1 | EtOHnc2 | Galnc1 | Galnc2 |
| 13 |         | YGL138C   | YPDcl2 | YPDcl3  | EtOHcl1 | EtOHcl2 | Galcl1 | YPDnc1 | YPDnc2 | YPDnc3 | YPDnc4  | EtOHnc1 | EtOHnc2 | Galnc1 | Galnc2 |
| 13 |         | YDR391C   | YPDcl2 | YPDcl3  | EtOHcl1 | EtOHcl2 | Galcl1 | YPDnc1 | YPDnc2 | YPDnc3 | YPDnc4  | EtOHnc1 | EtOHnc2 | Galnc1 | Galnc2 |
| 13 |         | YOR131C   | YPDcl2 | YPDcl3  | EtOHcl1 | EtOHcl2 | Galcl1 | YPDnc1 | YPDnc2 | YPDnc3 | YPDnc4  | EtOHnc1 | EtOHnc2 | Galnc1 | Galnc2 |
| 13 | HXT3    | YDR345C   | YPDcl2 | YPDcl3  | EtOHcl1 | EtOHcl2 | Galcl1 | YPDnc1 | YPDnc2 | YPDnc3 | YPDnc4  | EtOHnc1 | EtOHnc2 | Galnc1 | Galnc2 |
| 13 | MNN2    | YBR015C   | YPDcl2 | YPDcl3  | EtOHcl1 | EtOHcl2 | Galcl1 | YPDnc1 | YPDnc2 | YPDnc3 | YPDnc4  | EtOHnc1 | EtOHnc2 | Galnc1 | Galnc2 |
| 13 | ESL1    | YIL151C   | YPDcl2 | YPDcl3  | EtOHcl1 | EtOHcl2 | Galcl1 | YPDnc1 | YPDnc2 | YPDnc3 | YPDnc4  | EtOHnc1 | EtOHnc2 | Galnc1 | Galnc2 |
| 13 | PML1    | YLR016C   | YPDcl2 | YPDcl3  | EtOHcl1 | EtOHcl2 | Galcl1 | YPDnc1 | YPDnc2 | YPDnc3 | YPDnc4  | EtOHnc1 | EtOHnc2 | Galnc1 | Galnc2 |
| 13 | APC2    | YLR127C   | YPDcl2 | YPDcl3  | EtOHcl1 | EtOHcl2 | Galcl1 | YPDnc1 | YPDnc2 | YPDnc3 | YPDnc4  | EtOHnc1 | EtOHnc2 | Galnc1 | Galnc2 |
| 13 | UBP10   | YNL186W   | YPDcl2 | YPDcl3  | EtOHcl1 | EtOHcl2 | Galcl1 | YPDnc1 | YPDnc2 | YPDnc3 | YPDnc4  | EtOHnc1 | EtOHnc2 | Galnc1 | Galnc2 |
| 13 | LSB3    | YFR024C-A | YPDcl2 | YPDcl3  | EtOHcl1 | EtOHcl2 | Galcl1 | YPDnc1 | YPDnc2 | YPDnc3 | YPDnc4  | EtOHnc1 | EtOHnc2 | Galnc1 | Galnc2 |
| 13 | RPC40   | YPR110C   | YPDcl2 | YPDcl3  | EtOHcl1 | EtOHcl2 | Galcl1 | YPDnc1 | YPDnc2 | YPDnc3 | YPDnc4  | EtOHnc1 | EtOHnc2 | Galnc1 | Galnc2 |
| 13 |         | YNL324W   | YPDcl2 | YPDcl3  | EtOHcl1 | EtOHcl2 | Galcl1 | YPDnc1 | YPDnc2 | YPDnc3 | YPDnc4  | EtOHnc1 | EtOHnc2 | Galnc1 | Galnc2 |
| 13 | FEN1    | YCR034W   | YPDcl2 | YPDcl3  | EtOHcl1 | EtOHcl2 | Galcl1 | YPDnc1 | YPDnc2 | YPDnc3 | YPDnc4  | EtOHnc1 | EtOHnc2 | Galnc1 | Galnc2 |
| 13 | CKA1    | YIL035C   | YPDcl2 | YPDcl3  | EtOHcl1 | EtOHcl2 | Galcl1 | YPDnc1 | YPDnc2 | YPDnc3 | YPDnc4  | EtOHnc1 | EtOHnc2 | Galnc1 | Galnc2 |
| 13 | HEK2    | YBL032W   | YPDcl2 | YPDcl3  | EtOHcl1 | EtOHcl2 | Galcl1 | YPDnc1 | YPDnc2 | YPDnc3 | YPDnc4  | EtOHnc1 | EtOHnc2 | Galnc1 | Galnc2 |
| 13 | RSE1    | YML049C   | YPDcl2 | YPDcl3  | EtOHcl1 | EtOHcl2 | Galcl1 | YPDnc1 | YPDnc2 | YPDnc3 | YPDnc4  | EtOHnc1 | EtOHnc2 | Galnc1 | Galnc2 |
| 13 |         | YKL083W   | YPDcl2 | YPDcl3  | EtOHcl1 | EtOHcl2 | Galcl1 | YPDnc1 | YPDnc2 | YPDnc3 | YPDnc4  | EtOHnc1 | EtOHnc2 | Galnc1 | Galnc2 |
| 13 | PIM1    | YBL022C   | YPDcl2 | YPDcl3  | EtOHcl1 | EtOHcl2 | Galcl1 | YPDnc1 | YPDnc2 | YPDnc3 | YPDnc4  | EtOHnc1 | EtOHnc2 | Galnc1 | Galnc2 |
| 13 | CUS1    | YMR240C   | YPDcl2 | YPDcl3  | EtOHcl1 | EtOHcl2 | Galcl1 | YPDnc1 | YPDnc2 | YPDnc3 | YPDnc4  | EtOHnc1 | EtOHnc2 | Galnc1 | Galnc2 |
| 13 |         | YIL089W   | YPDcl2 | YPDcl3  | EtOHcl1 | EtOHcl2 | Galcl1 | YPDnc1 | YPDnc2 | YPDnc3 | YPDnc4  | EtOHnc1 | EtOHnc2 | Galnc1 | Galnc2 |
| 13 | AFT1    | YGL071W   | YPDcl2 | YPDcl3  | EtOHcl1 | EtOHcl2 | Galcl1 | YPDnc1 | YPDnc2 | YPDnc3 | YPDnc4  | EtOHnc1 | EtOHnc2 | Galnc1 | Galnc2 |
| 13 | BEM3    | YPL115C   | YPDcl2 | YPDcl3  | EtOHcl1 | EtOHcl2 | Galcl1 | YPDnc1 | YPDnc2 | YPDnc3 | YPDnc4  | EtOHnc1 | EtOHnc2 | Galnc1 | Galnc2 |
| 13 | ERB1    | YMR049C   | YPDcl2 | YPDcl3  | EtOHcl1 | EtOHcl2 | Galcl1 | YPDnc1 | YPDnc2 | YPDnc3 | YPDnc4  | EtOHnc1 | EtOHnc2 | Galnc1 | Galnc2 |
| 13 | MET30   | YIL046W   | YPDcl2 | YPDcl3  | EtOHcl1 | EtOHcl2 | Galcl1 | YPDnc1 | YPDnc2 | YPDnc3 | YPDnc4  | EtOHnc1 | EtOHnc2 | Galnc1 | Galnc2 |
| 13 | GOT1    | YMR292W   | YPDcl2 | YPDcl3  | EtOHcl1 | EtOHcl2 | Galcl1 | YPDnc1 | YPDnc2 | YPDnc3 | YPDnc4  | EtOHnc1 | EtOHnc2 | Galnc1 | Galnc2 |
| 13 | PRP28   | YDR243C   | YPDcl2 | YPDcl3  | EtOHcl1 | EtOHcl2 | Galcl1 | YPDnc1 | YPDnc2 | YPDnc3 | YPDnc4  | EtOHnc1 | EtOHnc2 | Galnc1 | Galnc2 |

|    |        |           |        |        |         |         |        |        |        |        |        |         |         |        |        |
|----|--------|-----------|--------|--------|---------|---------|--------|--------|--------|--------|--------|---------|---------|--------|--------|
| 13 | APC11  | YDL008W   | YPDcl2 | YPDcl3 | EtOHcl1 | EtOHcl2 | Galcl1 | YPDnc1 | YPDnc2 | YPDnc3 | YPDnc4 | EtOHnc1 | EtOHnc2 | Galnc1 | Galnc2 |
| 13 | TIM23  | YNR017W   | YPDcl2 | YPDcl3 | EtOHcl1 | EtOHcl2 | Galcl1 | YPDnc1 | YPDnc2 | YPDnc3 | YPDnc4 | EtOHnc1 | EtOHnc2 | Galnc1 | Galnc2 |
| 13 | FIT3   | YOR383C   | YPDcl2 | YPDcl3 | EtOHcl1 | EtOHcl2 | Galcl1 | YPDnc1 | YPDnc2 | YPDnc3 | YPDnc4 | EtOHnc1 | EtOHnc2 | Galnc1 | Galnc2 |
| 13 |        | YOR246C   | YPDcl2 | YPDcl3 | EtOHcl1 | EtOHcl2 | Galcl1 | YPDnc1 | YPDnc2 | YPDnc3 | YPDnc4 | EtOHnc1 | EtOHnc2 | Galnc1 | Galnc2 |
| 13 | IOC2   | YLR095C   | YPDcl2 | YPDcl3 | EtOHcl1 | EtOHcl2 | Galcl1 | YPDnc1 | YPDnc2 | YPDnc3 | YPDnc4 | EtOHnc1 | EtOHnc2 | Galnc1 | Galnc2 |
| 13 |        | YNL050C   | YPDcl2 | YPDcl3 | EtOHcl1 | EtOHcl2 | Galcl1 | YPDnc1 | YPDnc2 | YPDnc3 | YPDnc4 | EtOHnc1 | EtOHnc2 | Galnc1 | Galnc2 |
| 13 | TRS33  | YOR115C   | YPDcl2 | YPDcl3 | EtOHcl1 | EtOHcl2 | Galcl1 | YPDnc1 | YPDnc2 | YPDnc3 | YPDnc4 | EtOHnc1 | EtOHnc2 | Galnc1 | Galnc2 |
| 13 | RPS7B  | YNL096C   | YPDcl2 | YPDcl3 | EtOHcl1 | EtOHcl2 | Galcl1 | YPDnc1 | YPDnc2 | YPDnc3 | YPDnc4 | EtOHnc1 | EtOHnc2 | Galnc1 | Galnc2 |
| 13 | RIX7   | YLL034C   | YPDcl2 | YPDcl3 | EtOHcl1 | EtOHcl2 | Galcl1 | YPDnc1 | YPDnc2 | YPDnc3 | YPDnc4 | EtOHnc1 | EtOHnc2 | Galnc1 | Galnc2 |
| 13 | DED81  | YHR019C   | YPDcl2 | YPDcl3 | EtOHcl1 | EtOHcl2 | Galcl1 | YPDnc1 | YPDnc2 | YPDnc3 | YPDnc4 | EtOHnc1 | EtOHnc2 | Galnc1 | Galnc2 |
| 13 |        | YKL033W-  | YPDcl2 | YPDcl3 | EtOHcl1 | EtOHcl2 | Galcl1 | YPDnc1 | YPDnc2 | YPDnc3 | YPDnc4 | EtOHnc1 | EtOHnc2 | Galnc1 | Galnc2 |
| 13 | NMA111 | YNL123W   | YPDcl2 | YPDcl3 | EtOHcl1 | EtOHcl2 | Galcl1 | YPDnc1 | YPDnc2 | YPDnc3 | YPDnc4 | EtOHnc1 | EtOHnc2 | Galnc1 | Galnc2 |
| 13 | BRO1   | YPL084W   | YPDcl2 | YPDcl3 | EtOHcl1 | EtOHcl2 | Galcl1 | YPDnc1 | YPDnc2 | YPDnc3 | YPDnc4 | EtOHnc1 | EtOHnc2 | Galnc1 | Galnc2 |
| 13 |        | YNL162W-  | YPDcl2 | YPDcl3 | EtOHcl1 | EtOHcl2 | Galcl1 | YPDnc1 | YPDnc2 | YPDnc3 | YPDnc4 | EtOHnc1 | EtOHnc2 | Galnc1 | Galnc2 |
| 13 | TNA1   | YGR260W   | YPDcl2 | YPDcl3 | EtOHcl1 | EtOHcl2 | Galcl1 | YPDnc1 | YPDnc2 | YPDnc3 | YPDnc4 | EtOHnc1 | EtOHnc2 | Galnc1 | Galnc2 |
| 13 |        | YMR122W-  | YPDcl2 | YPDcl3 | EtOHcl1 | EtOHcl2 | Galcl1 | YPDnc1 | YPDnc2 | YPDnc3 | YPDnc4 | EtOHnc1 | EtOHnc2 | Galnc1 | Galnc2 |
| 13 | RPL2A  | YFR031C-A | YPDcl2 | YPDcl3 | EtOHcl1 | EtOHcl2 | Galcl1 | YPDnc1 | YPDnc2 | YPDnc3 | YPDnc4 | EtOHnc1 | EtOHnc2 | Galnc1 | Galnc2 |
| 13 | RPL4B  | YDR012W   | YPDcl2 | YPDcl3 | EtOHcl1 | EtOHcl2 | Galcl1 | YPDnc1 | YPDnc2 | YPDnc3 | YPDnc4 | EtOHnc1 | EtOHnc2 | Galnc1 | Galnc2 |
| 13 | AZF1   | YOR113W   | YPDcl2 | YPDcl3 | EtOHcl1 | EtOHcl2 | Galcl1 | YPDnc1 | YPDnc2 | YPDnc3 | YPDnc4 | EtOHnc1 | EtOHnc2 | Galnc1 | Galnc2 |
| 13 | AIM21  | YIR003W   | YPDcl2 | YPDcl3 | EtOHcl1 | EtOHcl2 | Galcl1 | YPDnc1 | YPDnc2 | YPDnc3 | YPDnc4 | EtOHnc1 | EtOHnc2 | Galnc1 | Galnc2 |
| 13 | DAD3   | YBR233W-  | YPDcl2 | YPDcl3 | EtOHcl1 | EtOHcl2 | Galcl1 | YPDnc1 | YPDnc2 | YPDnc3 | YPDnc4 | EtOHnc1 | EtOHnc2 | Galnc1 | Galnc2 |
| 13 | ECM19  | YLR390W   | YPDcl2 | YPDcl3 | EtOHcl1 | EtOHcl2 | Galcl1 | YPDnc1 | YPDnc2 | YPDnc3 | YPDnc4 | EtOHnc1 | EtOHnc2 | Galnc1 | Galnc2 |
| 13 | CDC16  | YKL022C   | YPDcl2 | YPDcl3 | EtOHcl1 | EtOHcl2 | Galcl1 | YPDnc1 | YPDnc2 | YPDnc3 | YPDnc4 | EtOHnc1 | EtOHnc2 | Galnc1 | Galnc2 |
| 13 | REC104 | YHR157W   | YPDcl2 | YPDcl3 | EtOHcl1 | EtOHcl2 | Galcl1 | YPDnc1 | YPDnc2 | YPDnc3 | YPDnc4 | EtOHnc1 | EtOHnc2 | Galnc1 | Galnc2 |
| 13 | SYN8   | YAL014C   | YPDcl2 | YPDcl3 | EtOHcl1 | EtOHcl2 | Galcl1 | YPDnc1 | YPDnc2 | YPDnc3 | YPDnc4 | EtOHnc1 | EtOHnc2 | Galnc1 | Galnc2 |
| 13 | THP1   | YOL072W   | YPDcl2 | YPDcl3 | EtOHcl1 | EtOHcl2 | Galcl1 | YPDnc1 | YPDnc2 | YPDnc3 | YPDnc4 | EtOHnc1 | EtOHnc2 | Galnc1 | Galnc2 |
| 13 | HIT1   | YJR055W   | YPDcl2 | YPDcl3 | EtOHcl1 | EtOHcl2 | Galcl1 | YPDnc1 | YPDnc2 | YPDnc3 | YPDnc4 | EtOHnc1 | EtOHnc2 | Galnc1 | Galnc2 |
| 13 | FZO1   | YBR179C   | YPDcl2 | YPDcl3 | EtOHcl1 | EtOHcl2 | Galcl1 | YPDnc1 | YPDnc2 | YPDnc3 | YPDnc4 | EtOHnc1 | EtOHnc2 | Galnc1 | Galnc2 |
| 13 | BUR2   | YLR226W   | YPDcl2 | YPDcl3 | EtOHcl1 | EtOHcl2 | Galcl1 | YPDnc1 | YPDnc2 | YPDnc3 | YPDnc4 | EtOHnc1 | EtOHnc2 | Galnc1 | Galnc2 |
| 13 |        | YBR230W-  | YPDcl2 | YPDcl3 | EtOHcl1 | EtOHcl2 | Galcl1 | YPDnc1 | YPDnc2 | YPDnc3 | YPDnc4 | EtOHnc1 | EtOHnc2 | Galnc1 | Galnc2 |
| 13 | LDB19  | YOR322C   | YPDcl2 | YPDcl3 | EtOHcl1 | EtOHcl2 | Galcl1 | YPDnc1 | YPDnc2 | YPDnc3 | YPDnc4 | EtOHnc1 | EtOHnc2 | Galnc1 | Galnc2 |
| 13 | COP1   | YDL145C   | YPDcl2 | YPDcl3 | EtOHcl1 | EtOHcl2 | Galcl1 | YPDnc1 | YPDnc2 | YPDnc3 | YPDnc4 | EtOHnc1 | EtOHnc2 | Galnc1 | Galnc2 |
| 13 | EXO1   | YOR033C   | YPDcl2 | YPDcl3 | EtOHcl1 | EtOHcl2 | Galcl1 | YPDnc1 | YPDnc2 | YPDnc3 | YPDnc4 | EtOHnc1 | EtOHnc2 | Galnc1 | Galnc2 |
| 13 | MSA2   | YKR077W   | YPDcl2 | YPDcl3 | EtOHcl1 | EtOHcl2 | Galcl1 | YPDnc1 | YPDnc2 | YPDnc3 | YPDnc4 | EtOHnc1 | EtOHnc2 | Galnc1 | Galnc2 |

|          |         |        |        |         |         |        |        |        |        |        |         |         |        |        |
|----------|---------|--------|--------|---------|---------|--------|--------|--------|--------|--------|---------|---------|--------|--------|
| 13 SRP54 | YPR088C | YPDcl2 | YPDcl3 | EtOHcl1 | EtOHcl2 | Galcl1 | YPDnc1 | YPDnc2 | YPDnc3 | YPDnc4 | EtOHnc1 | EtOHnc2 | Galnc1 | Galnc2 |
| 13       | YPR063C | YPDcl2 | YPDcl3 | EtOHcl1 | EtOHcl2 | Galcl1 | YPDnc1 | YPDnc2 | YPDnc3 | YPDnc4 | EtOHnc1 | EtOHnc2 | Galnc1 | Galnc2 |
| 13 DCW1  | YKL046C | YPDcl2 | YPDcl3 | EtOHcl1 | EtOHcl2 | Galcl1 | YPDnc1 | YPDnc2 | YPDnc3 | YPDnc4 | EtOHnc1 | EtOHnc2 | Galnc1 | Galnc2 |
| 13 GLE2  | YER107C | YPDcl2 | YPDcl3 | EtOHcl1 | EtOHcl2 | Galcl1 | YPDnc1 | YPDnc2 | YPDnc3 | YPDnc4 | EtOHnc1 | EtOHnc2 | Galnc1 | Galnc2 |
| 13 SMK1  | YPR054W | YPDcl2 | YPDcl3 | EtOHcl1 | EtOHcl2 | Galcl1 | YPDnc1 | YPDnc2 | YPDnc3 | YPDnc4 | EtOHnc1 | EtOHnc2 | Galnc1 | Galnc2 |
| 13 AIM5  | YBR262C | YPDcl2 | YPDcl3 | EtOHcl1 | EtOHcl2 | Galcl1 | YPDnc1 | YPDnc2 | YPDnc3 | YPDnc4 | EtOHnc1 | EtOHnc2 | Galnc1 | Galnc2 |
| 13 SLU7  | YDR088C | YPDcl2 | YPDcl3 | EtOHcl1 | EtOHcl2 | Galcl1 | YPDnc1 | YPDnc2 | YPDnc3 | YPDnc4 | EtOHnc1 | EtOHnc2 | Galnc1 | Galnc2 |
| 13 ECM10 | YEL030W | YPDcl2 | YPDcl3 | EtOHcl1 | EtOHcl2 | Galcl1 | YPDnc1 | YPDnc2 | YPDnc3 | YPDnc4 | EtOHnc1 | EtOHnc2 | Galnc1 | Galnc2 |
| 13 LYS1  | YIR034C | YPDcl2 | YPDcl3 | EtOHcl1 | EtOHcl2 | Galcl1 | YPDnc1 | YPDnc2 | YPDnc3 | YPDnc4 | EtOHnc1 | EtOHnc2 | Galnc1 | Galnc2 |
| 13 LAC1  | YKL008C | YPDcl2 | YPDcl3 | EtOHcl1 | EtOHcl2 | Galcl1 | YPDnc1 | YPDnc2 | YPDnc3 | YPDnc4 | EtOHnc1 | EtOHnc2 | Galnc1 | Galnc2 |
| 13 TDA1  | YMR291W | YPDcl2 | YPDcl3 | EtOHcl1 | EtOHcl2 | Galcl1 | YPDnc1 | YPDnc2 | YPDnc3 | YPDnc4 | EtOHnc1 | EtOHnc2 | Galnc1 | Galnc2 |
| 13 RAD33 | YML011C | YPDcl2 | YPDcl3 | EtOHcl1 | EtOHcl2 | Galcl1 | YPDnc1 | YPDnc2 | YPDnc3 | YPDnc4 | EtOHnc1 | EtOHnc2 | Galnc1 | Galnc2 |
| 13 CAM1  | YPL048W | YPDcl2 | YPDcl3 | EtOHcl1 | EtOHcl2 | Galcl1 | YPDnc1 | YPDnc2 | YPDnc3 | YPDnc4 | EtOHnc1 | EtOHnc2 | Galnc1 | Galnc2 |
| 13 BNR1  | YIL159W | YPDcl2 | YPDcl3 | EtOHcl1 | EtOHcl2 | Galcl1 | YPDnc1 | YPDnc2 | YPDnc3 | YPDnc4 | EtOHnc1 | EtOHnc2 | Galnc1 | Galnc2 |
| 13 PRP43 | YGL120C | YPDcl2 | YPDcl3 | EtOHcl1 | EtOHcl2 | Galcl1 | YPDnc1 | YPDnc2 | YPDnc3 | YPDnc4 | EtOHnc1 | EtOHnc2 | Galnc1 | Galnc2 |
| 13 SEN34 | YAR008W | YPDcl2 | YPDcl3 | EtOHcl1 | EtOHcl2 | Galcl1 | YPDnc1 | YPDnc2 | YPDnc3 | YPDnc4 | EtOHnc1 | EtOHnc2 | Galnc1 | Galnc2 |
| 13 CDC20 | YGL116W | YPDcl2 | YPDcl3 | EtOHcl1 | EtOHcl2 | Galcl1 | YPDnc1 | YPDnc2 | YPDnc3 | YPDnc4 | EtOHnc1 | EtOHnc2 | Galnc1 | Galnc2 |
| 13 VID30 | YGL227W | YPDcl2 | YPDcl3 | EtOHcl1 | EtOHcl2 | Galcl1 | YPDnc1 | YPDnc2 | YPDnc3 | YPDnc4 | EtOHnc1 | EtOHnc2 | Galnc1 | Galnc2 |
| 13       | YDR506C | YPDcl2 | YPDcl3 | EtOHcl1 | EtOHcl2 | Galcl1 | YPDnc1 | YPDnc2 | YPDnc3 | YPDnc4 | EtOHnc1 | EtOHnc2 | Galnc1 | Galnc2 |
| 13       | YER135C | YPDcl2 | YPDcl3 | EtOHcl1 | EtOHcl2 | Galcl1 | YPDnc1 | YPDnc2 | YPDnc3 | YPDnc4 | EtOHnc1 | EtOHnc2 | Galnc1 | Galnc2 |
| 13 BFR2  | YDR299W | YPDcl2 | YPDcl3 | EtOHcl1 | EtOHcl2 | Galcl1 | YPDnc1 | YPDnc2 | YPDnc3 | YPDnc4 | EtOHnc1 | EtOHnc2 | Galnc1 | Galnc2 |
| 13       | YOR223W | YPDcl2 | YPDcl3 | EtOHcl1 | EtOHcl2 | Galcl1 | YPDnc1 | YPDnc2 | YPDnc3 | YPDnc4 | EtOHnc1 | EtOHnc2 | Galnc1 | Galnc2 |
| 13       | YLR001C | YPDcl2 | YPDcl3 | EtOHcl1 | EtOHcl2 | Galcl1 | YPDnc1 | YPDnc2 | YPDnc3 | YPDnc4 | EtOHnc1 | EtOHnc2 | Galnc1 | Galnc2 |
| 13 EFB1  | YAL003W | YPDcl2 | YPDcl3 | EtOHcl1 | EtOHcl2 | Galcl1 | YPDnc1 | YPDnc2 | YPDnc3 | YPDnc4 | EtOHnc1 | EtOHnc2 | Galnc1 | Galnc2 |
| 13 PFS1  | YHR185C | YPDcl2 | YPDcl3 | EtOHcl1 | EtOHcl2 | Galcl1 | YPDnc1 | YPDnc2 | YPDnc3 | YPDnc4 | EtOHnc1 | EtOHnc2 | Galnc1 | Galnc2 |
| 13 DIG1  | YPL049C | YPDcl2 | YPDcl3 | EtOHcl1 | EtOHcl2 | Galcl1 | YPDnc1 | YPDnc2 | YPDnc3 | YPDnc4 | EtOHnc1 | EtOHnc2 | Galnc1 | Galnc2 |
| 13 RCN1  | YKL159C | YPDcl2 | YPDcl3 | EtOHcl1 | EtOHcl2 | Galcl1 | YPDnc1 | YPDnc2 | YPDnc3 | YPDnc4 | EtOHnc1 | EtOHnc2 | Galnc1 | Galnc2 |
| 13 PEX2  | YJL210W | YPDcl2 | YPDcl3 | EtOHcl1 | EtOHcl2 | Galcl1 | YPDnc1 | YPDnc2 | YPDnc3 | YPDnc4 | EtOHnc1 | EtOHnc2 | Galnc1 | Galnc2 |
| 13 ACH1  | YBL015W | YPDcl2 | YPDcl3 | EtOHcl1 | EtOHcl2 | Galcl1 | YPDnc1 | YPDnc2 | YPDnc3 | YPDnc4 | EtOHnc1 | EtOHnc2 | Galnc1 | Galnc2 |
| 13 ACS1  | YAL054C | YPDcl2 | YPDcl3 | EtOHcl1 | EtOHcl2 | Galcl1 | YPDnc1 | YPDnc2 | YPDnc3 | YPDnc4 | EtOHnc1 | EtOHnc2 | Galnc1 | Galnc2 |
| 13 RPN4  | YDL020C | YPDcl2 | YPDcl3 | EtOHcl1 | EtOHcl2 | Galcl1 | YPDnc1 | YPDnc2 | YPDnc3 | YPDnc4 | EtOHnc1 | EtOHnc2 | Galnc1 | Galnc2 |
| 13 PRP6  | YBR055C | YPDcl2 | YPDcl3 | EtOHcl1 | EtOHcl2 | Galcl1 | YPDnc1 | YPDnc2 | YPDnc3 | YPDnc4 | EtOHnc1 | EtOHnc2 | Galnc1 | Galnc2 |
| 13 RPL2B | YIL018W | YPDcl2 | YPDcl3 | EtOHcl1 | EtOHcl2 | Galcl1 | YPDnc1 | YPDnc2 | YPDnc3 | YPDnc4 | EtOHnc1 | EtOHnc2 | Galnc1 | Galnc2 |
| 13 SET4  | YJL105W | YPDcl2 | YPDcl3 | EtOHcl1 | EtOHcl2 | Galcl1 | YPDnc1 | YPDnc2 | YPDnc3 | YPDnc4 | EtOHnc1 | EtOHnc2 | Galnc1 | Galnc2 |

|    |       |           |        |        |         |         |        |        |        |        |        |         |         |        |        |
|----|-------|-----------|--------|--------|---------|---------|--------|--------|--------|--------|--------|---------|---------|--------|--------|
| 13 | KSS1  | YGR040W   | YPDcl2 | YPDcl3 | EtOHcl1 | EtOHcl2 | Galcl1 | YPDnc1 | YPDnc2 | YPDnc3 | YPDnc4 | EtOHnc1 | EtOHnc2 | Galnc1 | Galnc2 |
| 13 | URA8  | YJR103W   | YPDcl2 | YPDcl3 | EtOHcl1 | EtOHcl2 | Galcl1 | YPDnc1 | YPDnc2 | YPDnc3 | YPDnc4 | EtOHnc1 | EtOHnc2 | Galnc1 | Galnc2 |
| 13 |       | YLL037W   | YPDcl2 | YPDcl3 | EtOHcl1 | EtOHcl2 | Galcl1 | YPDnc1 | YPDnc2 | YPDnc3 | YPDnc4 | EtOHnc1 | EtOHnc2 | Galnc1 | Galnc2 |
| 13 | ULS1  | YOR191W   | YPDcl2 | YPDcl3 | EtOHcl1 | EtOHcl2 | Galcl1 | YPDnc1 | YPDnc2 | YPDnc3 | YPDnc4 | EtOHnc1 | EtOHnc2 | Galnc1 | Galnc2 |
| 13 | IRC11 | YOR013W   | YPDcl2 | YPDcl3 | EtOHcl1 | EtOHcl2 | Galcl1 | YPDnc1 | YPDnc2 | YPDnc3 | YPDnc4 | EtOHnc1 | EtOHnc2 | Galnc1 | Galnc2 |
| 13 | YPT32 | YGL210W   | YPDcl2 | YPDcl3 | EtOHcl1 | EtOHcl2 | Galcl1 | YPDnc1 | YPDnc2 | YPDnc3 | YPDnc4 | EtOHnc1 | EtOHnc2 | Galnc1 | Galnc2 |
| 13 |       | YFL051C   | YPDcl2 | YPDcl3 | EtOHcl1 | EtOHcl2 | Galcl1 | YPDnc1 | YPDnc2 | YPDnc3 | YPDnc4 | EtOHnc1 | EtOHnc2 | Galnc1 | Galnc2 |
| 13 |       | YDR413C   | YPDcl2 | YPDcl3 | EtOHcl1 | EtOHcl2 | Galcl1 | YPDnc1 | YPDnc2 | YPDnc3 | YPDnc4 | EtOHnc1 | EtOHnc2 | Galnc1 | Galnc2 |
| 13 | RRM3  | YHR031C   | YPDcl2 | YPDcl3 | EtOHcl1 | EtOHcl2 | Galcl1 | YPDnc1 | YPDnc2 | YPDnc3 | YPDnc4 | EtOHnc1 | EtOHnc2 | Galnc1 | Galnc2 |
| 13 | ILM1  | YJR118C   | YPDcl2 | YPDcl3 | EtOHcl1 | EtOHcl2 | Galcl1 | YPDnc1 | YPDnc2 | YPDnc3 | YPDnc4 | EtOHnc1 | EtOHnc2 | Galnc1 | Galnc2 |
| 13 |       | YIR040C   | YPDcl2 | YPDcl3 | EtOHcl1 | EtOHcl2 | Galcl1 | YPDnc1 | YPDnc2 | YPDnc3 | YPDnc4 | EtOHnc1 | EtOHnc2 | Galnc1 | Galnc2 |
| 13 |       | YMR031W   | YPDcl2 | YPDcl3 | EtOHcl1 | EtOHcl2 | Galcl1 | YPDnc1 | YPDnc2 | YPDnc3 | YPDnc4 | EtOHnc1 | EtOHnc2 | Galnc1 | Galnc2 |
| 13 | SCW4  | YGR279C   | YPDcl2 | YPDcl3 | EtOHcl1 | EtOHcl2 | Galcl1 | YPDnc1 | YPDnc2 | YPDnc3 | YPDnc4 | EtOHnc1 | EtOHnc2 | Galnc1 | Galnc2 |
| 13 | BSD2  | YBR290W   | YPDcl2 | YPDcl3 | EtOHcl1 | EtOHcl2 | Galcl1 | YPDnc1 | YPDnc2 | YPDnc3 | YPDnc4 | EtOHnc1 | EtOHnc2 | Galnc1 | Galnc2 |
| 13 | ECM40 | YMR062C   | YPDcl2 | YPDcl3 | EtOHcl1 | EtOHcl2 | Galcl1 | YPDnc1 | YPDnc2 | YPDnc3 | YPDnc4 | EtOHnc1 | EtOHnc2 | Galnc1 | Galnc2 |
| 13 | SGM1  | YJR134C   | YPDcl2 | YPDcl3 | EtOHcl1 | EtOHcl2 | Galcl1 | YPDnc1 | YPDnc2 | YPDnc3 | YPDnc4 | EtOHnc1 | EtOHnc2 | Galnc1 | Galnc2 |
| 13 | FRE6  | YLL051C   | YPDcl2 | YPDcl3 | EtOHcl1 | EtOHcl2 | Galcl1 | YPDnc1 | YPDnc2 | YPDnc3 | YPDnc4 | EtOHnc1 | EtOHnc2 | Galnc1 | Galnc2 |
| 13 |       | YDL094C   | YPDcl2 | YPDcl3 | EtOHcl1 | EtOHcl2 | Galcl1 | YPDnc1 | YPDnc2 | YPDnc3 | YPDnc4 | EtOHnc1 | EtOHnc2 | Galnc1 | Galnc2 |
| 13 | SRN2  | YLR119W   | YPDcl2 | YPDcl3 | EtOHcl1 | EtOHcl2 | Galcl1 | YPDnc1 | YPDnc2 | YPDnc3 | YPDnc4 | EtOHnc1 | EtOHnc2 | Galnc1 | Galnc2 |
| 13 | SEE1  | YIL064W   | YPDcl2 | YPDcl3 | EtOHcl1 | EtOHcl2 | Galcl1 | YPDnc1 | YPDnc2 | YPDnc3 | YPDnc4 | EtOHnc1 | EtOHnc2 | Galnc1 | Galnc2 |
| 13 | MEP2  | YNL142W   | YPDcl2 | YPDcl3 | EtOHcl1 | EtOHcl2 | Galcl1 | YPDnc1 | YPDnc2 | YPDnc3 | YPDnc4 | EtOHnc1 | EtOHnc2 | Galnc1 | Galnc2 |
| 13 | FSH2  | YMR222C   | YPDcl2 | YPDcl3 | EtOHcl1 | EtOHcl2 | Galcl1 | YPDnc1 | YPDnc2 | YPDnc3 | YPDnc4 | EtOHnc1 | EtOHnc2 | Galnc1 | Galnc2 |
| 13 | DCD1  | YHR144C   | YPDcl2 | YPDcl3 | EtOHcl1 | EtOHcl2 | Galcl1 | YPDnc1 | YPDnc2 | YPDnc3 | YPDnc4 | EtOHnc1 | EtOHnc2 | Galnc1 | Galnc2 |
| 13 |       | YBR178W   | YPDcl2 | YPDcl3 | EtOHcl1 | EtOHcl2 | Galcl1 | YPDnc1 | YPDnc2 | YPDnc3 | YPDnc4 | EtOHnc1 | EtOHnc2 | Galnc1 | Galnc2 |
| 13 |       | YNL311C   | YPDcl2 | YPDcl3 | EtOHcl1 | EtOHcl2 | Galcl1 | YPDnc1 | YPDnc2 | YPDnc3 | YPDnc4 | EtOHnc1 | EtOHnc2 | Galnc1 | Galnc2 |
| 13 | ARV1  | YLR242C   | YPDcl2 | YPDcl3 | EtOHcl1 | EtOHcl2 | Galcl1 | YPDnc1 | YPDnc2 | YPDnc3 | YPDnc4 | EtOHnc1 | EtOHnc2 | Galnc1 | Galnc2 |
| 13 | HMF1  | YER057C   | YPDcl2 | YPDcl3 | EtOHcl1 | EtOHcl2 | Galcl1 | YPDnc1 | YPDnc2 | YPDnc3 | YPDnc4 | EtOHnc1 | EtOHnc2 | Galnc1 | Galnc2 |
| 13 | LUG1  | YCR087C-A | YPDcl2 | YPDcl3 | EtOHcl1 | EtOHcl2 | Galcl1 | YPDnc1 | YPDnc2 | YPDnc3 | YPDnc4 | EtOHnc1 | EtOHnc2 | Galnc1 | Galnc2 |
| 13 | USA1  | YML029W   | YPDcl2 | YPDcl3 | EtOHcl1 | EtOHcl2 | Galcl1 | YPDnc1 | YPDnc2 | YPDnc3 | YPDnc4 | EtOHnc1 | EtOHnc2 | Galnc1 | Galnc2 |
| 13 | VRP1  | YLR337C   | YPDcl2 | YPDcl3 | EtOHcl1 | EtOHcl2 | Galcl1 | YPDnc1 | YPDnc2 | YPDnc3 | YPDnc4 | EtOHnc1 | EtOHnc2 | Galnc1 | Galnc2 |
| 13 | POP5  | YAL033W   | YPDcl2 | YPDcl3 | EtOHcl1 | EtOHcl2 | Galcl1 | YPDnc1 | YPDnc2 | YPDnc3 | YPDnc4 | EtOHnc1 | EtOHnc2 | Galnc1 | Galnc2 |
| 13 | FRE4  | YNR060W   | YPDcl2 | YPDcl3 | EtOHcl1 | EtOHcl2 | Galcl1 | YPDnc1 | YPDnc2 | YPDnc3 | YPDnc4 | EtOHnc1 | EtOHnc2 | Galnc1 | Galnc2 |
| 13 | MMS2  | YGL087C   | YPDcl2 | YPDcl3 | EtOHcl1 | EtOHcl2 | Galcl1 | YPDnc1 | YPDnc2 | YPDnc3 | YPDnc4 | EtOHnc1 | EtOHnc2 | Galnc1 | Galnc2 |
| 13 |       | YML037C   | YPDcl2 | YPDcl3 | EtOHcl1 | EtOHcl2 | Galcl1 | YPDnc1 | YPDnc2 | YPDnc3 | YPDnc4 | EtOHnc1 | EtOHnc2 | Galnc1 | Galnc2 |

|           |           |        |        |         |         |        |        |        |        |        |         |         |        |        |
|-----------|-----------|--------|--------|---------|---------|--------|--------|--------|--------|--------|---------|---------|--------|--------|
| 13 DUN1   | YDL101C   | YPDcl2 | YPDcl3 | EtOHcl1 | EtOHcl2 | Galcl1 | YPDnc1 | YPDnc2 | YPDnc3 | YPDnc4 | EtOHnc1 | EtOHnc2 | Galnc1 | Galnc2 |
| 13 REF2   | YDR195W   | YPDcl2 | YPDcl3 | EtOHcl1 | EtOHcl2 | Galcl1 | YPDnc1 | YPDnc2 | YPDnc3 | YPDnc4 | EtOHnc1 | EtOHnc2 | Galnc1 | Galnc2 |
| 13 POL3   | YDL102W   | YPDcl2 | YPDcl3 | EtOHcl1 | EtOHcl2 | Galcl1 | YPDnc1 | YPDnc2 | YPDnc3 | YPDnc4 | EtOHnc1 | EtOHnc2 | Galnc1 | Galnc2 |
| 13        | YOR170W   | YPDcl2 | YPDcl3 | EtOHcl1 | EtOHcl2 | Galcl1 | YPDnc1 | YPDnc2 | YPDnc3 | YPDnc4 | EtOHnc1 | EtOHnc2 | Galnc1 | Galnc2 |
| 13 RNH70  | YGR276C   | YPDcl2 | YPDcl3 | EtOHcl1 | EtOHcl2 | Galcl1 | YPDnc1 | YPDnc2 | YPDnc3 | YPDnc4 | EtOHnc1 | EtOHnc2 | Galnc1 | Galnc2 |
| 13        | YLR363W-  | YPDcl2 | YPDcl3 | EtOHcl1 | EtOHcl2 | Galcl1 | YPDnc1 | YPDnc2 | YPDnc3 | YPDnc4 | EtOHnc1 | EtOHnc2 | Galnc1 | Galnc2 |
| 13 MRPL25 | YGR076C   | YPDcl2 | YPDcl3 | EtOHcl1 | EtOHcl2 | Galcl1 | YPDnc1 | YPDnc2 | YPDnc3 | YPDnc4 | EtOHnc1 | EtOHnc2 | Galnc1 | Galnc2 |
| 13 MAK31  | YCR020C-A | YPDcl2 | YPDcl3 | EtOHcl1 | EtOHcl2 | Galcl1 | YPDnc1 | YPDnc2 | YPDnc3 | YPDnc4 | EtOHnc1 | EtOHnc2 | Galnc1 | Galnc2 |
| 13 BPL1   | YDL141W   | YPDcl2 | YPDcl3 | EtOHcl1 | EtOHcl2 | Galcl1 | YPDnc1 | YPDnc2 | YPDnc3 | YPDnc4 | EtOHnc1 | EtOHnc2 | Galnc1 | Galnc2 |
| 13        | YMR075C-  | YPDcl2 | YPDcl3 | EtOHcl1 | EtOHcl2 | Galcl1 | YPDnc1 | YPDnc2 | YPDnc3 | YPDnc4 | EtOHnc1 | EtOHnc2 | Galnc1 | Galnc2 |
| 13 STP1   | YDR463W   | YPDcl2 | YPDcl3 | EtOHcl1 | EtOHcl2 | Galcl1 | YPDnc1 | YPDnc2 | YPDnc3 | YPDnc4 | EtOHnc1 | EtOHnc2 | Galnc1 | Galnc2 |
| 13        | YPL168W   | YPDcl2 | YPDcl3 | EtOHcl1 | EtOHcl2 | Galcl1 | YPDnc1 | YPDnc2 | YPDnc3 | YPDnc4 | EtOHnc1 | EtOHnc2 | Galnc1 | Galnc2 |
| 13 SKP1   | YDR328C   | YPDcl2 | YPDcl3 | EtOHcl1 | EtOHcl2 | Galcl1 | YPDnc1 | YPDnc2 | YPDnc3 | YPDnc4 | EtOHnc1 | EtOHnc2 | Galnc1 | Galnc2 |
| 13        | YGR021W   | YPDcl2 | YPDcl3 | EtOHcl1 | EtOHcl2 | Galcl1 | YPDnc1 | YPDnc2 | YPDnc3 | YPDnc4 | EtOHnc1 | EtOHnc2 | Galnc1 | Galnc2 |
| 13 SUI3   | YPL237W   | YPDcl2 | YPDcl3 | EtOHcl1 | EtOHcl2 | Galcl1 | YPDnc1 | YPDnc2 | YPDnc3 | YPDnc4 | EtOHnc1 | EtOHnc2 | Galnc1 | Galnc2 |
| 13 TRM2   | YKR056W   | YPDcl2 | YPDcl3 | EtOHcl1 | EtOHcl2 | Galcl1 | YPDnc1 | YPDnc2 | YPDnc3 | YPDnc4 | EtOHnc1 | EtOHnc2 | Galnc1 | Galnc2 |
| 13 MRE11  | YMR224C   | YPDcl2 | YPDcl3 | EtOHcl1 | EtOHcl2 | Galcl1 | YPDnc1 | YPDnc2 | YPDnc3 | YPDnc4 | EtOHnc1 | EtOHnc2 | Galnc1 | Galnc2 |
| 13 COG4   | YPR105C   | YPDcl2 | YPDcl3 | EtOHcl1 | EtOHcl2 | Galcl1 | YPDnc1 | YPDnc2 | YPDnc3 | YPDnc4 | EtOHnc1 | EtOHnc2 | Galnc1 | Galnc2 |
| 13        | YKL030W   | YPDcl2 | YPDcl3 | EtOHcl1 | EtOHcl2 | Galcl1 | YPDnc1 | YPDnc2 | YPDnc3 | YPDnc4 | EtOHnc1 | EtOHnc2 | Galnc1 | Galnc2 |
| 13 SEN54  | YPL083C   | YPDcl2 | YPDcl3 | EtOHcl1 | EtOHcl2 | Galcl1 | YPDnc1 | YPDnc2 | YPDnc3 | YPDnc4 | EtOHnc1 | EtOHnc2 | Galnc1 | Galnc2 |
| 13 CMC2   | YBL059C-A | YPDcl2 | YPDcl3 | EtOHcl1 | EtOHcl2 | Galcl1 | YPDnc1 | YPDnc2 | YPDnc3 | YPDnc4 | EtOHnc1 | EtOHnc2 | Galnc1 | Galnc2 |
| 13        | YGL217C   | YPDcl2 | YPDcl3 | EtOHcl1 | EtOHcl2 | Galcl1 | YPDnc1 | YPDnc2 | YPDnc3 | YPDnc4 | EtOHnc1 | EtOHnc2 | Galnc1 | Galnc2 |
| 13 ARG8   | YOL140W   | YPDcl2 | YPDcl3 | EtOHcl1 | EtOHcl2 | Galcl1 | YPDnc1 | YPDnc2 | YPDnc3 | YPDnc4 | EtOHnc1 | EtOHnc2 | Galnc1 | Galnc2 |
| 13 NOC2   | YOR206W   | YPDcl2 | YPDcl3 | EtOHcl1 | EtOHcl2 | Galcl1 | YPDnc1 | YPDnc2 | YPDnc3 | YPDnc4 | EtOHnc1 | EtOHnc2 | Galnc1 | Galnc2 |
| 13 DSS4   | YPR017C   | YPDcl2 | YPDcl3 | EtOHcl1 | EtOHcl2 | Galcl1 | YPDnc1 | YPDnc2 | YPDnc3 | YPDnc4 | EtOHnc1 | EtOHnc2 | Galnc1 | Galnc2 |
| 13 ZRG17  | YNR039C   | YPDcl2 | YPDcl3 | EtOHcl1 | EtOHcl2 | Galcl1 | YPDnc1 | YPDnc2 | YPDnc3 | YPDnc4 | EtOHnc1 | EtOHnc2 | Galnc1 | Galnc2 |
| 13 FLO9   | YAL063C   | YPDcl2 | YPDcl3 | EtOHcl1 | EtOHcl2 | Galcl1 | YPDnc1 | YPDnc2 | YPDnc3 | YPDnc4 | EtOHnc1 | EtOHnc2 | Galnc1 | Galnc2 |
| 13 GCN2   | YDR283C   | YPDcl2 | YPDcl3 | EtOHcl1 | EtOHcl2 | Galcl1 | YPDnc1 | YPDnc2 | YPDnc3 | YPDnc4 | EtOHnc1 | EtOHnc2 | Galnc1 | Galnc2 |
| 13 QCR9   | YGR183C   | YPDcl2 | YPDcl3 | EtOHcl1 | EtOHcl2 | Galcl1 | YPDnc1 | YPDnc2 | YPDnc3 | YPDnc4 | EtOHnc1 | EtOHnc2 | Galnc1 | Galnc2 |
| 13 RPS16A | YMR143W   | YPDcl2 | YPDcl3 | EtOHcl1 | EtOHcl2 | Galcl1 | YPDnc1 | YPDnc2 | YPDnc3 | YPDnc4 | EtOHnc1 | EtOHnc2 | Galnc1 | Galnc2 |
| 13 OKP1   | YGR179C   | YPDcl2 | YPDcl3 | EtOHcl1 | EtOHcl2 | Galcl1 | YPDnc1 | YPDnc2 | YPDnc3 | YPDnc4 | EtOHnc1 | EtOHnc2 | Galnc1 | Galnc2 |
| 13 PAU7   | YAR020C   | YPDcl2 | YPDcl3 | EtOHcl1 | EtOHcl2 | Galcl1 | YPDnc1 | YPDnc2 | YPDnc3 | YPDnc4 | EtOHnc1 | EtOHnc2 | Galnc1 | Galnc2 |
| 13 SIS2   | YKR072C   | YPDcl2 | YPDcl3 | EtOHcl1 | EtOHcl2 | Galcl1 | YPDnc1 | YPDnc2 | YPDnc3 | YPDnc4 | EtOHnc1 | EtOHnc2 | Galnc1 | Galnc2 |
| 13 IST1   | YNL265C   | YPDcl2 | YPDcl3 | EtOHcl1 | EtOHcl2 | Galcl1 | YPDnc1 | YPDnc2 | YPDnc3 | YPDnc4 | EtOHnc1 | EtOHnc2 | Galnc1 | Galnc2 |

|          |                       |        |        |         |         |        |        |        |        |        |         |         |        |        |
|----------|-----------------------|--------|--------|---------|---------|--------|--------|--------|--------|--------|---------|---------|--------|--------|
| 13 TRP3  | YKL211C               | YPDcl2 | YPDcl3 | EtOHcl1 | EtOHcl2 | Galcl1 | YPDnc1 | YPDnc2 | YPDnc3 | YPDnc4 | EtOHnc1 | EtOHnc2 | Galnc1 | Galnc2 |
| 13 SKI3  | YPR189W               | YPDcl2 | YPDcl3 | EtOHcl1 | EtOHcl2 | Galcl1 | YPDnc1 | YPDnc2 | YPDnc3 | YPDnc4 | EtOHnc1 | EtOHnc2 | Galnc1 | Galnc2 |
| 13 QRI1  | YDL103C               | YPDcl2 | YPDcl3 | EtOHcl1 | EtOHcl2 | Galcl1 | YPDnc1 | YPDnc2 | YPDnc3 | YPDnc4 | EtOHnc1 | EtOHnc2 | Galnc1 | Galnc2 |
| 13 RPL1B | YGL135W               | YPDcl2 | YPDcl3 | EtOHcl1 | EtOHcl2 | Galcl1 | YPDnc1 | YPDnc2 | YPDnc3 | YPDnc4 | EtOHnc1 | EtOHnc2 | Galnc1 | Galnc2 |
| 13 FBP26 | YJL155C               | YPDcl2 | YPDcl3 | EtOHcl1 | EtOHcl2 | Galcl1 | YPDnc1 | YPDnc2 | YPDnc3 | YPDnc4 | EtOHnc1 | EtOHnc2 | Galnc1 | Galnc2 |
| 13       | YGL082W               | YPDcl2 | YPDcl3 | EtOHcl1 | EtOHcl2 | Galcl1 | YPDnc1 | YPDnc2 | YPDnc3 | YPDnc4 | EtOHnc1 | EtOHnc2 | Galnc1 | Galnc2 |
| 13       | YNR048W               | YPDcl2 | YPDcl3 | EtOHcl1 | EtOHcl2 | Galcl1 | YPDnc1 | YPDnc2 | YPDnc3 | YPDnc4 | EtOHnc1 | EtOHnc2 | Galnc1 | Galnc2 |
| 13 SAM35 | YHR083W               | YPDcl2 | YPDcl3 | EtOHcl1 | EtOHcl2 | Galcl1 | YPDnc1 | YPDnc2 | YPDnc3 | YPDnc4 | EtOHnc1 | EtOHnc2 | Galnc1 | Galnc2 |
| 13       | YLL023C               | YPDcl2 | YPDcl3 | EtOHcl1 | EtOHcl2 | Galcl1 | YPDnc1 | YPDnc2 | YPDnc3 | YPDnc4 | EtOHnc1 | EtOHnc2 | Galnc1 | Galnc2 |
| 13       | YLR202C               | YPDcl2 | YPDcl3 | EtOHcl1 | EtOHcl2 | Galcl1 | YPDnc1 | YPDnc2 | YPDnc3 | YPDnc4 | EtOHnc1 | EtOHnc2 | Galnc1 | Galnc2 |
| 13 SAD1  | YFR005C               | YPDcl2 | YPDcl3 | EtOHcl1 | EtOHcl2 | Galcl1 | YPDnc1 | YPDnc2 | YPDnc3 | YPDnc4 | EtOHnc1 | EtOHnc2 | Galnc1 | Galnc2 |
| 13 YBP1  | YBR216C               | YPDcl2 | YPDcl3 | EtOHcl1 | EtOHcl2 | Galcl1 | YPDnc1 | YPDnc2 | YPDnc3 | YPDnc4 | EtOHnc1 | EtOHnc2 | Galnc1 | Galnc2 |
| 13       | YGR265W               | YPDcl2 | YPDcl3 | EtOHcl1 | EtOHcl2 | Galcl1 | YPDnc1 | YPDnc2 | YPDnc3 | YPDnc4 | EtOHnc1 | EtOHnc2 | Galnc1 | Galnc2 |
| 13 TIM9  | YEL020W- <del>Y</del> | YPDcl2 | YPDcl3 | EtOHcl1 | EtOHcl2 | Galcl1 | YPDnc1 | YPDnc2 | YPDnc3 | YPDnc4 | EtOHnc1 | EtOHnc2 | Galnc1 | Galnc2 |
| 13 UTR4  | YEL038W               | YPDcl2 | YPDcl3 | EtOHcl1 | EtOHcl2 | Galcl1 | YPDnc1 | YPDnc2 | YPDnc3 | YPDnc4 | EtOHnc1 | EtOHnc2 | Galnc1 | Galnc2 |
| 13 RRP43 | YCR035C               | YPDcl2 | YPDcl3 | EtOHcl1 | EtOHcl2 | Galcl1 | YPDnc1 | YPDnc2 | YPDnc3 | YPDnc4 | EtOHnc1 | EtOHnc2 | Galnc1 | Galnc2 |
| 13 PEX12 | YMR026C               | YPDcl2 | YPDcl3 | EtOHcl1 | EtOHcl2 | Galcl1 | YPDnc1 | YPDnc2 | YPDnc3 | YPDnc4 | EtOHnc1 | EtOHnc2 | Galnc1 | Galnc2 |
| 13 NGG1  | YDR176W               | YPDcl2 | YPDcl3 | EtOHcl1 | EtOHcl2 | Galcl1 | YPDnc1 | YPDnc2 | YPDnc3 | YPDnc4 | EtOHnc1 | EtOHnc2 | Galnc1 | Galnc2 |
| 13 RPN14 | YGL004C               | YPDcl2 | YPDcl3 | EtOHcl1 | EtOHcl2 | Galcl1 | YPDnc1 | YPDnc2 | YPDnc3 | YPDnc4 | EtOHnc1 | EtOHnc2 | Galnc1 | Galnc2 |
| 13       | YDR222W               | YPDcl2 | YPDcl3 | EtOHcl1 | EtOHcl2 | Galcl1 | YPDnc1 | YPDnc2 | YPDnc3 | YPDnc4 | EtOHnc1 | EtOHnc2 | Galnc1 | Galnc2 |
| 13 ORC4  | YPR162C               | YPDcl2 | YPDcl3 | EtOHcl1 | EtOHcl2 | Galcl1 | YPDnc1 | YPDnc2 | YPDnc3 | YPDnc4 | EtOHnc1 | EtOHnc2 | Galnc1 | Galnc2 |
| 13 MCD4  | YKL165C               | YPDcl2 | YPDcl3 | EtOHcl1 | EtOHcl2 | Galcl1 | YPDnc1 | YPDnc2 | YPDnc3 | YPDnc4 | EtOHnc1 | EtOHnc2 | Galnc1 | Galnc2 |
| 13 UBX3  | YDL091C               | YPDcl2 | YPDcl3 | EtOHcl1 | EtOHcl2 | Galcl1 | YPDnc1 | YPDnc2 | YPDnc3 | YPDnc4 | EtOHnc1 | EtOHnc2 | Galnc1 | Galnc2 |
| 13 VPS35 | YJL154C               | YPDcl2 | YPDcl3 | EtOHcl1 | EtOHcl2 | Galcl1 | YPDnc1 | YPDnc2 | YPDnc3 | YPDnc4 | EtOHnc1 | EtOHnc2 | Galnc1 | Galnc2 |
| 13       | YDR220C               | YPDcl2 | YPDcl3 | EtOHcl1 | EtOHcl2 | Galcl1 | YPDnc1 | YPDnc2 | YPDnc3 | YPDnc4 | EtOHnc1 | EtOHnc2 | Galnc1 | Galnc2 |
| 13 TPS2  | YDR074W               | YPDcl2 | YPDcl3 | EtOHcl1 | EtOHcl2 | Galcl1 | YPDnc1 | YPDnc2 | YPDnc3 | YPDnc4 | EtOHnc1 | EtOHnc2 | Galnc1 | Galnc2 |
| 13 THI2  | YBR240C               | YPDcl2 | YPDcl3 | EtOHcl1 | EtOHcl2 | Galcl1 | YPDnc1 | YPDnc2 | YPDnc3 | YPDnc4 | EtOHnc1 | EtOHnc2 | Galnc1 | Galnc2 |
| 13 PAM1  | YDR251W               | YPDcl2 | YPDcl3 | EtOHcl1 | EtOHcl2 | Galcl1 | YPDnc1 | YPDnc2 | YPDnc3 | YPDnc4 | EtOHnc1 | EtOHnc2 | Galnc1 | Galnc2 |
| 13 UTP9  | YHR196W               | YPDcl2 | YPDcl3 | EtOHcl1 | EtOHcl2 | Galcl1 | YPDnc1 | YPDnc2 | YPDnc3 | YPDnc4 | EtOHnc1 | EtOHnc2 | Galnc1 | Galnc2 |
| 13 GPI10 | YGL142C               | YPDcl2 | YPDcl3 | EtOHcl1 | EtOHcl2 | Galcl1 | YPDnc1 | YPDnc2 | YPDnc3 | YPDnc4 | EtOHnc1 | EtOHnc2 | Galnc1 | Galnc2 |
| 13 MHT1  | YLL062C               | YPDcl2 | YPDcl3 | EtOHcl1 | EtOHcl2 | Galcl1 | YPDnc1 | YPDnc2 | YPDnc3 | YPDnc4 | EtOHnc1 | EtOHnc2 | Galnc1 | Galnc2 |
| 13 PTC3  | YBL056W               | YPDcl2 | YPDcl3 | EtOHcl1 | EtOHcl2 | Galcl1 | YPDnc1 | YPDnc2 | YPDnc3 | YPDnc4 | EtOHnc1 | EtOHnc2 | Galnc1 | Galnc2 |
| 13 PTC2  | YER089C               | YPDcl2 | YPDcl3 | EtOHcl1 | EtOHcl2 | Galcl1 | YPDnc1 | YPDnc2 | YPDnc3 | YPDnc4 | EtOHnc1 | EtOHnc2 | Galnc1 | Galnc2 |
| 13 AIR2  | YDL175C               | YPDcl2 | YPDcl3 | EtOHcl1 | EtOHcl2 | Galcl1 | YPDnc1 | YPDnc2 | YPDnc3 | YPDnc4 | EtOHnc1 | EtOHnc2 | Galnc1 | Galnc2 |



|    |       |                       |        |        |         |         |        |        |        |        |        |         |         |        |        |
|----|-------|-----------------------|--------|--------|---------|---------|--------|--------|--------|--------|--------|---------|---------|--------|--------|
| 13 | KRE5  | YOR336W               | YPDcl2 | YPDcl3 | EtOHcl1 | EtOHcl2 | Galcl1 | YPDnc1 | YPDnc2 | YPDnc3 | YPDnc4 | EtOHnc1 | EtOHnc2 | Galnc1 | Galnc2 |
| 13 |       | YKL100W- <del>A</del> | YPDcl2 | YPDcl3 | EtOHcl1 | EtOHcl2 | Galcl1 | YPDnc1 | YPDnc2 | YPDnc3 | YPDnc4 | EtOHnc1 | EtOHnc2 | Galnc1 | Galnc2 |
| 13 |       | YML131W               | YPDcl2 | YPDcl3 | EtOHcl1 | EtOHcl2 | Galcl1 | YPDnc1 | YPDnc2 | YPDnc3 | YPDnc4 | EtOHnc1 | EtOHnc2 | Galnc1 | Galnc2 |
| 13 | THO2  | YNL139C               | YPDcl2 | YPDcl3 | EtOHcl1 | EtOHcl2 | Galcl1 | YPDnc1 | YPDnc2 | YPDnc3 | YPDnc4 | EtOHnc1 | EtOHnc2 | Galnc1 | Galnc2 |
| 13 |       | YHR192W               | YPDcl2 | YPDcl3 | EtOHcl1 | EtOHcl2 | Galcl1 | YPDnc1 | YPDnc2 | YPDnc3 | YPDnc4 | EtOHnc1 | EtOHnc2 | Galnc1 | Galnc2 |
| 13 |       | YNL313C               | YPDcl2 | YPDcl3 | EtOHcl1 | EtOHcl2 | Galcl1 | YPDnc1 | YPDnc2 | YPDnc3 | YPDnc4 | EtOHnc1 | EtOHnc2 | Galnc1 | Galnc2 |
| 13 |       | YCR051W               | YPDcl2 | YPDcl3 | EtOHcl1 | EtOHcl2 | Galcl1 | YPDnc1 | YPDnc2 | YPDnc3 | YPDnc4 | EtOHnc1 | EtOHnc2 | Galnc1 | Galnc2 |
| 13 | RIM4  | YHL024W               | YPDcl2 | YPDcl3 | EtOHcl1 | EtOHcl2 | Galcl1 | YPDnc1 | YPDnc2 | YPDnc3 | YPDnc4 | EtOHnc1 | EtOHnc2 | Galnc1 | Galnc2 |
| 13 |       | YJL185C               | YPDcl2 | YPDcl3 | EtOHcl1 | EtOHcl2 | Galcl1 | YPDnc1 | YPDnc2 | YPDnc3 | YPDnc4 | EtOHnc1 | EtOHnc2 | Galnc1 | Galnc2 |
| 13 | RPL3  | YOR063W               | YPDcl2 | YPDcl3 | EtOHcl1 | EtOHcl2 | Galcl1 | YPDnc1 | YPDnc2 | YPDnc3 | YPDnc4 | EtOHnc1 | EtOHnc2 | Galnc1 | Galnc2 |
| 13 | GPI2  | YPL076W               | YPDcl2 | YPDcl3 | EtOHcl1 | EtOHcl2 | Galcl1 | YPDnc1 | YPDnc2 | YPDnc3 | YPDnc4 | EtOHnc1 | EtOHnc2 | Galnc1 | Galnc2 |
| 13 | MPH1  | YIR002C               | YPDcl2 | YPDcl3 | EtOHcl1 | EtOHcl2 | Galcl1 | YPDnc1 | YPDnc2 | YPDnc3 | YPDnc4 | EtOHnc1 | EtOHnc2 | Galnc1 | Galnc2 |
| 13 | MEI4  | YER044C- <del>A</del> | YPDcl2 | YPDcl3 | EtOHcl1 | EtOHcl2 | Galcl1 | YPDnc1 | YPDnc2 | YPDnc3 | YPDnc4 | EtOHnc1 | EtOHnc2 | Galnc1 | Galnc2 |
| 13 | VID28 | YIL017C               | YPDcl2 | YPDcl3 | EtOHcl1 | EtOHcl2 | Galcl1 | YPDnc1 | YPDnc2 | YPDnc3 | YPDnc4 | EtOHnc1 | EtOHnc2 | Galnc1 | Galnc2 |
| 13 | COQ5  | YML110C               | YPDcl2 | YPDcl3 | EtOHcl1 | EtOHcl2 | Galcl1 | YPDnc1 | YPDnc2 | YPDnc3 | YPDnc4 | EtOHnc1 | EtOHnc2 | Galnc1 | Galnc2 |
| 13 | ROX1  | YPR065W               | YPDcl2 | YPDcl3 | EtOHcl1 | EtOHcl2 | Galcl1 | YPDnc1 | YPDnc2 | YPDnc3 | YPDnc4 | EtOHnc1 | EtOHnc2 | Galnc1 | Galnc2 |
| 13 | MEC3  | YLR288C               | YPDcl2 | YPDcl3 | EtOHcl1 | EtOHcl2 | Galcl1 | YPDnc1 | YPDnc2 | YPDnc3 | YPDnc4 | EtOHnc1 | EtOHnc2 | Galnc1 | Galnc2 |
| 13 | TOK1  | YJL093C               | YPDcl2 | YPDcl3 | EtOHcl1 | EtOHcl2 | Galcl1 | YPDnc1 | YPDnc2 | YPDnc3 | YPDnc4 | EtOHnc1 | EtOHnc2 | Galnc1 | Galnc2 |
| 13 | BSC5  | YNR069C               | YPDcl2 | YPDcl3 | EtOHcl1 | EtOHcl2 | Galcl1 | YPDnc1 | YPDnc2 | YPDnc3 | YPDnc4 | EtOHnc1 | EtOHnc2 | Galnc1 | Galnc2 |
| 13 | PWP2  | YCR057C               | YPDcl2 | YPDcl3 | EtOHcl1 | EtOHcl2 | Galcl1 | YPDnc1 | YPDnc2 | YPDnc3 | YPDnc4 | EtOHnc1 | EtOHnc2 | Galnc1 | Galnc2 |
| 13 | ACF4  | YJR083C               | YPDcl2 | YPDcl3 | EtOHcl1 | EtOHcl2 | Galcl1 | YPDnc1 | YPDnc2 | YPDnc3 | YPDnc4 | EtOHnc1 | EtOHnc2 | Galnc1 | Galnc2 |
| 13 | PEX21 | YGR239C               | YPDcl2 | YPDcl3 | EtOHcl1 | EtOHcl2 | Galcl1 | YPDnc1 | YPDnc2 | YPDnc3 | YPDnc4 | EtOHnc1 | EtOHnc2 | Galnc1 | Galnc2 |
| 13 | YPT31 | YER031C               | YPDcl2 | YPDcl3 | EtOHcl1 | EtOHcl2 | Galcl1 | YPDnc1 | YPDnc2 | YPDnc3 | YPDnc4 | EtOHnc1 | EtOHnc2 | Galnc1 | Galnc2 |
| 13 | WSC2  | YNL283C               | YPDcl2 | YPDcl3 | EtOHcl1 | EtOHcl2 | Galcl1 | YPDnc1 | YPDnc2 | YPDnc3 | YPDnc4 | EtOHnc1 | EtOHnc2 | Galnc1 | Galnc2 |
| 13 | OPI10 | YOL032W               | YPDcl2 | YPDcl3 | EtOHcl1 | EtOHcl2 | Galcl1 | YPDnc1 | YPDnc2 | YPDnc3 | YPDnc4 | EtOHnc1 | EtOHnc2 | Galnc1 | Galnc2 |
| 13 |       | YLR194C               | YPDcl2 | YPDcl3 | EtOHcl1 | EtOHcl2 | Galcl1 | YPDnc1 | YPDnc2 | YPDnc3 | YPDnc4 | EtOHnc1 | EtOHnc2 | Galnc1 | Galnc2 |
| 13 | CCA1  | YER168C               | YPDcl2 | YPDcl3 | EtOHcl1 | EtOHcl2 | Galcl1 | YPDnc1 | YPDnc2 | YPDnc3 | YPDnc4 | EtOHnc1 | EtOHnc2 | Galnc1 | Galnc2 |
| 13 |       | YML031C- <del>A</del> | YPDcl2 | YPDcl3 | EtOHcl1 | EtOHcl2 | Galcl1 | YPDnc1 | YPDnc2 | YPDnc3 | YPDnc4 | EtOHnc1 | EtOHnc2 | Galnc1 | Galnc2 |
| 13 | TFB5  | YDR079C- <del>A</del> | YPDcl2 | YPDcl3 | EtOHcl1 | EtOHcl2 | Galcl1 | YPDnc1 | YPDnc2 | YPDnc3 | YPDnc4 | EtOHnc1 | EtOHnc2 | Galnc1 | Galnc2 |
| 13 |       | YMR181C               | YPDcl2 | YPDcl3 | EtOHcl1 | EtOHcl2 | Galcl1 | YPDnc1 | YPDnc2 | YPDnc3 | YPDnc4 | EtOHnc1 | EtOHnc2 | Galnc1 | Galnc2 |
| 13 | SIR2  | YDL042C               | YPDcl2 | YPDcl3 | EtOHcl1 | EtOHcl2 | Galcl1 | YPDnc1 | YPDnc2 | YPDnc3 | YPDnc4 | EtOHnc1 | EtOHnc2 | Galnc1 | Galnc2 |
| 13 |       | YNL109W               | YPDcl2 | YPDcl3 | EtOHcl1 | EtOHcl2 | Galcl1 | YPDnc1 | YPDnc2 | YPDnc3 | YPDnc4 | EtOHnc1 | EtOHnc2 | Galnc1 | Galnc2 |
| 13 | NTR2  | YKR022C               | YPDcl2 | YPDcl3 | EtOHcl1 | EtOHcl2 | Galcl1 | YPDnc1 | YPDnc2 | YPDnc3 | YPDnc4 | EtOHnc1 | EtOHnc2 | Galnc1 | Galnc2 |
| 13 | ADH6  | YMR318C               | YPDcl2 | YPDcl3 | EtOHcl1 | EtOHcl2 | Galcl1 | YPDnc1 | YPDnc2 | YPDnc3 | YPDnc4 | EtOHnc1 | EtOHnc2 | Galnc1 | Galnc2 |

|    |        |          |        |        |         |         |        |        |        |        |        |         |         |        |        |
|----|--------|----------|--------|--------|---------|---------|--------|--------|--------|--------|--------|---------|---------|--------|--------|
| 13 | MAG1   | YER142C  | YPDcl2 | YPDcl3 | EtOHcl1 | EtOHcl2 | Galcl1 | YPDnc1 | YPDnc2 | YPDnc3 | YPDnc4 | EtOHnc1 | EtOHnc2 | Galnc1 | Galnc2 |
| 13 | FIS1   | YIL065C  | YPDcl2 | YPDcl3 | EtOHcl1 | EtOHcl2 | Galcl1 | YPDnc1 | YPDnc2 | YPDnc3 | YPDnc4 | EtOHnc1 | EtOHnc2 | Galnc1 | Galnc2 |
| 13 | MDM36  | YPR083W  | YPDcl2 | YPDcl3 | EtOHcl1 | EtOHcl2 | Galcl1 | YPDnc1 | YPDnc2 | YPDnc3 | YPDnc4 | EtOHnc1 | EtOHnc2 | Galnc1 | Galnc2 |
| 13 | RIB1   | YBL033C  | YPDcl2 | YPDcl3 | EtOHcl1 | EtOHcl2 | Galcl1 | YPDnc1 | YPDnc2 | YPDnc3 | YPDnc4 | EtOHnc1 | EtOHnc2 | Galnc1 | Galnc2 |
| 13 |        | YDL159W- | YPDcl2 | YPDcl3 | EtOHcl1 | EtOHcl2 | Galcl1 | YPDnc1 | YPDnc2 | YPDnc3 | YPDnc4 | EtOHnc1 | EtOHnc2 | Galnc1 | Galnc2 |
| 13 | PRD1   | YCL057W  | YPDcl2 | YPDcl3 | EtOHcl1 | EtOHcl2 | Galcl1 | YPDnc1 | YPDnc2 | YPDnc3 | YPDnc4 | EtOHnc1 | EtOHnc2 | Galnc1 | Galnc2 |
| 13 | TMA64  | YDR117C  | YPDcl2 | YPDcl3 | EtOHcl1 | EtOHcl2 | Galcl1 | YPDnc1 | YPDnc2 | YPDnc3 | YPDnc4 | EtOHnc1 | EtOHnc2 | Galnc1 | Galnc2 |
| 13 | CDD1   | YLR245C  | YPDcl2 | YPDcl3 | EtOHcl1 | EtOHcl2 | Galcl1 | YPDnc1 | YPDnc2 | YPDnc3 | YPDnc4 | EtOHnc1 | EtOHnc2 | Galnc1 | Galnc2 |
| 13 | KIP3   | YGL216W  | YPDcl2 | YPDcl3 | EtOHcl1 | EtOHcl2 | Galcl1 | YPDnc1 | YPDnc2 | YPDnc3 | YPDnc4 | EtOHnc1 | EtOHnc2 | Galnc1 | Galnc2 |
| 13 | RPL37A | YLR185W  | YPDcl2 | YPDcl3 | EtOHcl1 | EtOHcl2 | Galcl1 | YPDnc1 | YPDnc2 | YPDnc3 | YPDnc4 | EtOHnc1 | EtOHnc2 | Galnc1 | Galnc2 |
| 13 | MRN1   | YPL184C  | YPDcl2 | YPDcl3 | EtOHcl1 | EtOHcl2 | Galcl1 | YPDnc1 | YPDnc2 | YPDnc3 | YPDnc4 | EtOHnc1 | EtOHnc2 | Galnc1 | Galnc2 |
| 13 | IZH1   | YDR492W  | YPDcl2 | YPDcl3 | EtOHcl1 | EtOHcl2 | Galcl1 | YPDnc1 | YPDnc2 | YPDnc3 | YPDnc4 | EtOHnc1 | EtOHnc2 | Galnc1 | Galnc2 |
| 13 | CAF40  | YNL288W  | YPDcl2 | YPDcl3 | EtOHcl1 | EtOHcl2 | Galcl1 | YPDnc1 | YPDnc2 | YPDnc3 | YPDnc4 | EtOHnc1 | EtOHnc2 | Galnc1 | Galnc2 |
| 13 | TPC1   | YGR096W  | YPDcl2 | YPDcl3 | EtOHcl1 | EtOHcl2 | Galcl1 | YPDnc1 | YPDnc2 | YPDnc3 | YPDnc4 | EtOHnc1 | EtOHnc2 | Galnc1 | Galnc2 |
| 13 | PMD1   | YER132C  | YPDcl2 | YPDcl3 | EtOHcl1 | EtOHcl2 | Galcl1 | YPDnc1 | YPDnc2 | YPDnc3 | YPDnc4 | EtOHnc1 | EtOHnc2 | Galnc1 | Galnc2 |
| 13 |        | YHR202W  | YPDcl2 | YPDcl3 | EtOHcl1 | EtOHcl2 | Galcl1 | YPDnc1 | YPDnc2 | YPDnc3 | YPDnc4 | EtOHnc1 | EtOHnc2 | Galnc1 | Galnc2 |
| 13 | URB2   | YJR041C  | YPDcl2 | YPDcl3 | EtOHcl1 | EtOHcl2 | Galcl1 | YPDnc1 | YPDnc2 | YPDnc3 | YPDnc4 | EtOHnc1 | EtOHnc2 | Galnc1 | Galnc2 |
| 13 |        | YKR045C  | YPDcl2 | YPDcl3 | EtOHcl1 | EtOHcl2 | Galcl1 | YPDnc1 | YPDnc2 | YPDnc3 | YPDnc4 | EtOHnc1 | EtOHnc2 | Galnc1 | Galnc2 |
| 13 | APL4   | YPR029C  | YPDcl2 | YPDcl3 | EtOHcl1 | EtOHcl2 | Galcl1 | YPDnc1 | YPDnc2 | YPDnc3 | YPDnc4 | EtOHnc1 | EtOHnc2 | Galnc1 | Galnc2 |
| 13 | HXT14  | YNL318C  | YPDcl2 | YPDcl3 | EtOHcl1 | EtOHcl2 | Galcl1 | YPDnc1 | YPDnc2 | YPDnc3 | YPDnc4 | EtOHnc1 | EtOHnc2 | Galnc1 | Galnc2 |
| 13 |        | YLL056C  | YPDcl2 | YPDcl3 | EtOHcl1 | EtOHcl2 | Galcl1 | YPDnc1 | YPDnc2 | YPDnc3 | YPDnc4 | EtOHnc1 | EtOHnc2 | Galnc1 | Galnc2 |
| 13 | SET6   | YPL165C  | YPDcl2 | YPDcl3 | EtOHcl1 | EtOHcl2 | Galcl1 | YPDnc1 | YPDnc2 | YPDnc3 | YPDnc4 | EtOHnc1 | EtOHnc2 | Galnc1 | Galnc2 |
| 13 | SEC12  | YNR026C  | YPDcl2 | YPDcl3 | EtOHcl1 | EtOHcl2 | Galcl1 | YPDnc1 | YPDnc2 | YPDnc3 | YPDnc4 | EtOHnc1 | EtOHnc2 | Galnc1 | Galnc2 |
| 13 |        | YLR120W- | YPDcl2 | YPDcl3 | EtOHcl1 | EtOHcl2 | Galcl1 | YPDnc1 | YPDnc2 | YPDnc3 | YPDnc4 | EtOHnc1 | EtOHnc2 | Galnc1 | Galnc2 |
| 13 | FMP49  | YER038W- | YPDcl2 | YPDcl3 | EtOHcl1 | EtOHcl2 | Galcl1 | YPDnc1 | YPDnc2 | YPDnc3 | YPDnc4 | EtOHnc1 | EtOHnc2 | Galnc1 | Galnc2 |
| 13 |        | YMR013W- | YPDcl2 | YPDcl3 | EtOHcl1 | EtOHcl2 | Galcl1 | YPDnc1 | YPDnc2 | YPDnc3 | YPDnc4 | EtOHnc1 | EtOHnc2 | Galnc1 | Galnc2 |
| 13 |        | YOR302W  | YPDcl2 | YPDcl3 | EtOHcl1 | EtOHcl2 | Galcl1 | YPDnc1 | YPDnc2 | YPDnc3 | YPDnc4 | EtOHnc1 | EtOHnc2 | Galnc1 | Galnc2 |
| 13 |        | YLR076C  | YPDcl2 | YPDcl3 | EtOHcl1 | EtOHcl2 | Galcl1 | YPDnc1 | YPDnc2 | YPDnc3 | YPDnc4 | EtOHnc1 | EtOHnc2 | Galnc1 | Galnc2 |
| 13 | TOS2   | YGR221C  | YPDcl2 | YPDcl3 | EtOHcl1 | EtOHcl2 | Galcl1 | YPDnc1 | YPDnc2 | YPDnc3 | YPDnc4 | EtOHnc1 | EtOHnc2 | Galnc1 | Galnc2 |
| 13 | DPS1   | YLL018C  | YPDcl2 | YPDcl3 | EtOHcl1 | EtOHcl2 | Galcl1 | YPDnc1 | YPDnc2 | YPDnc3 | YPDnc4 | EtOHnc1 | EtOHnc2 | Galnc1 | Galnc2 |
| 13 | HDA2   | YDR295C  | YPDcl2 | YPDcl3 | EtOHcl1 | EtOHcl2 | Galcl1 | YPDnc1 | YPDnc2 | YPDnc3 | YPDnc4 | EtOHnc1 | EtOHnc2 | Galnc1 | Galnc2 |
| 13 | PGM1   | YKL127W  | YPDcl2 | YPDcl3 | EtOHcl1 | EtOHcl2 | Galcl1 | YPDnc1 | YPDnc2 | YPDnc3 | YPDnc4 | EtOHnc1 | EtOHnc2 | Galnc1 | Galnc2 |
| 13 | AIM23  | YJL131C  | YPDcl2 | YPDcl3 | EtOHcl1 | EtOHcl2 | Galcl1 | YPDnc1 | YPDnc2 | YPDnc3 | YPDnc4 | EtOHnc1 | EtOHnc2 | Galnc1 | Galnc2 |
| 13 | VPS68  | YOL129W  | YPDcl2 | YPDcl3 | EtOHcl1 | EtOHcl2 | Galcl1 | YPDnc1 | YPDnc2 | YPDnc3 | YPDnc4 | EtOHnc1 | EtOHnc2 | Galnc1 | Galnc2 |

|    |       |           |        |        |         |         |        |        |        |        |        |         |         |        |        |
|----|-------|-----------|--------|--------|---------|---------|--------|--------|--------|--------|--------|---------|---------|--------|--------|
| 13 | POL1  | YNL102W   | YPDcl2 | YPDcl3 | EtOHcl1 | EtOHcl2 | Galcl1 | YPDnc1 | YPDnc2 | YPDnc3 | YPDnc4 | EtOHnc1 | EtOHnc2 | Galnc1 | Galnc2 |
| 13 | TRM9  | YML014W   | YPDcl2 | YPDcl3 | EtOHcl1 | EtOHcl2 | Galcl1 | YPDnc1 | YPDnc2 | YPDnc3 | YPDnc4 | EtOHnc1 | EtOHnc2 | Galnc1 | Galnc2 |
| 13 | MRPL7 | YDR237W   | YPDcl2 | YPDcl3 | EtOHcl1 | EtOHcl2 | Galcl1 | YPDnc1 | YPDnc2 | YPDnc3 | YPDnc4 | EtOHnc1 | EtOHnc2 | Galnc1 | Galnc2 |
| 13 | FOX2  | YKR009C   | YPDcl2 | YPDcl3 | EtOHcl1 | EtOHcl2 | Galcl1 | YPDnc1 | YPDnc2 | YPDnc3 | YPDnc4 | EtOHnc1 | EtOHnc2 | Galnc1 | Galnc2 |
| 13 |       | YPR039W   | YPDcl2 | YPDcl3 | EtOHcl1 | EtOHcl2 | Galcl1 | YPDnc1 | YPDnc2 | YPDnc3 | YPDnc4 | EtOHnc1 | EtOHnc2 | Galnc1 | Galnc2 |
| 13 | YME1  | YPR024W   | YPDcl2 | YPDcl3 | EtOHcl1 | EtOHcl2 | Galcl1 | YPDnc1 | YPDnc2 | YPDnc3 | YPDnc4 | EtOHnc1 | EtOHnc2 | Galnc1 | Galnc2 |
| 13 |       | YOR289W   | YPDcl2 | YPDcl3 | EtOHcl1 | EtOHcl2 | Galcl1 | YPDnc1 | YPDnc2 | YPDnc3 | YPDnc4 | EtOHnc1 | EtOHnc2 | Galnc1 | Galnc2 |
| 13 | HSP60 | YLR259C   | YPDcl2 | YPDcl3 | EtOHcl1 | EtOHcl2 | Galcl1 | YPDnc1 | YPDnc2 | YPDnc3 | YPDnc4 | EtOHnc1 | EtOHnc2 | Galnc1 | Galnc2 |
| 13 | FMP46 | YKR049C   | YPDcl2 | YPDcl3 | EtOHcl1 | EtOHcl2 | Galcl1 | YPDnc1 | YPDnc2 | YPDnc3 | YPDnc4 | EtOHnc1 | EtOHnc2 | Galnc1 | Galnc2 |
| 13 | LHS1  | YKL073W   | YPDcl2 | YPDcl3 | EtOHcl1 | EtOHcl2 | Galcl1 | YPDnc1 | YPDnc2 | YPDnc3 | YPDnc4 | EtOHnc1 | EtOHnc2 | Galnc1 | Galnc2 |
| 13 | SSN3  | YPL042C   | YPDcl2 | YPDcl3 | EtOHcl1 | EtOHcl2 | Galcl1 | YPDnc1 | YPDnc2 | YPDnc3 | YPDnc4 | EtOHnc1 | EtOHnc2 | Galnc1 | Galnc2 |
| 13 | MRS3  | YJL133W   | YPDcl2 | YPDcl3 | EtOHcl1 | EtOHcl2 | Galcl1 | YPDnc1 | YPDnc2 | YPDnc3 | YPDnc4 | EtOHnc1 | EtOHnc2 | Galnc1 | Galnc2 |
| 13 | ATP19 | YOL077W-  | YPDcl2 | YPDcl3 | EtOHcl1 | EtOHcl2 | Galcl1 | YPDnc1 | YPDnc2 | YPDnc3 | YPDnc4 | EtOHnc1 | EtOHnc2 | Galnc1 | Galnc2 |
| 13 | GLK1  | YCL040W   | YPDcl2 | YPDcl3 | EtOHcl1 | EtOHcl2 | Galcl1 | YPDnc1 | YPDnc2 | YPDnc3 | YPDnc4 | EtOHnc1 | EtOHnc2 | Galnc1 | Galnc2 |
| 13 | KES1  | YPL145C   | YPDcl2 | YPDcl3 | EtOHcl1 | EtOHcl2 | Galcl1 | YPDnc1 | YPDnc2 | YPDnc3 | YPDnc4 | EtOHnc1 | EtOHnc2 | Galnc1 | Galnc2 |
| 13 | LDB17 | YDL146W   | YPDcl2 | YPDcl3 | EtOHcl1 | EtOHcl2 | Galcl1 | YPDnc1 | YPDnc2 | YPDnc3 | YPDnc4 | EtOHnc1 | EtOHnc2 | Galnc1 | Galnc2 |
| 13 | SAG1  | YJR004C   | YPDcl2 | YPDcl3 | EtOHcl1 | EtOHcl2 | Galcl1 | YPDnc1 | YPDnc2 | YPDnc3 | YPDnc4 | EtOHnc1 | EtOHnc2 | Galnc1 | Galnc2 |
| 13 | PCH2  | YBR186W   | YPDcl2 | YPDcl3 | EtOHcl1 | EtOHcl2 | Galcl1 | YPDnc1 | YPDnc2 | YPDnc3 | YPDnc4 | EtOHnc1 | EtOHnc2 | Galnc1 | Galnc2 |
| 13 | ERJ5  | YFR041C   | YPDcl2 | YPDcl3 | EtOHcl1 | EtOHcl2 | Galcl1 | YPDnc1 | YPDnc2 | YPDnc3 | YPDnc4 | EtOHnc1 | EtOHnc2 | Galnc1 | Galnc2 |
| 13 | SFT1  | YKL006C-A | YPDcl2 | YPDcl3 | EtOHcl1 | EtOHcl2 | Galcl1 | YPDnc1 | YPDnc2 | YPDnc3 | YPDnc4 | EtOHnc1 | EtOHnc2 | Galnc1 | Galnc2 |
| 13 | AQY1  | YPR192W   | YPDcl2 | YPDcl3 | EtOHcl1 | EtOHcl2 | Galcl1 | YPDnc1 | YPDnc2 | YPDnc3 | YPDnc4 | EtOHnc1 | EtOHnc2 | Galnc1 | Galnc2 |
| 13 | GCV2  | YMR189W   | YPDcl2 | YPDcl3 | EtOHcl1 | EtOHcl2 | Galcl1 | YPDnc1 | YPDnc2 | YPDnc3 | YPDnc4 | EtOHnc1 | EtOHnc2 | Galnc1 | Galnc2 |
| 13 | SIA1  | YOR137C   | YPDcl2 | YPDcl3 | EtOHcl1 | EtOHcl2 | Galcl1 | YPDnc1 | YPDnc2 | YPDnc3 | YPDnc4 | EtOHnc1 | EtOHnc2 | Galnc1 | Galnc2 |
| 13 | IES2  | YNL215W   | YPDcl2 | YPDcl3 | EtOHcl1 | EtOHcl2 | Galcl1 | YPDnc1 | YPDnc2 | YPDnc3 | YPDnc4 | EtOHnc1 | EtOHnc2 | Galnc1 | Galnc2 |
| 13 | NSE4  | YDL105W   | YPDcl2 | YPDcl3 | EtOHcl1 | EtOHcl2 | Galcl1 | YPDnc1 | YPDnc2 | YPDnc3 | YPDnc4 | EtOHnc1 | EtOHnc2 | Galnc1 | Galnc2 |
| 13 | BIK1  | YCL029C   | YPDcl2 | YPDcl3 | EtOHcl1 | EtOHcl2 | Galcl1 | YPDnc1 | YPDnc2 | YPDnc3 | YPDnc4 | EtOHnc1 | EtOHnc2 | Galnc1 | Galnc2 |
| 13 | CWC27 | YPL064C   | YPDcl2 | YPDcl3 | EtOHcl1 | EtOHcl2 | Galcl1 | YPDnc1 | YPDnc2 | YPDnc3 | YPDnc4 | EtOHnc1 | EtOHnc2 | Galnc1 | Galnc2 |
| 13 |       | YML054C-A | YPDcl2 | YPDcl3 | EtOHcl1 | EtOHcl2 | Galcl1 | YPDnc1 | YPDnc2 | YPDnc3 | YPDnc4 | EtOHnc1 | EtOHnc2 | Galnc1 | Galnc2 |
| 13 | MKT1  | YNL085W   | YPDcl2 | YPDcl3 | EtOHcl1 | EtOHcl2 | Galcl1 | YPDnc1 | YPDnc2 | YPDnc3 | YPDnc4 | EtOHnc1 | EtOHnc2 | Galnc1 | Galnc2 |
| 13 |       | YAL031W-A | YPDcl2 | YPDcl3 | EtOHcl1 | EtOHcl2 | Galcl1 | YPDnc1 | YPDnc2 | YPDnc3 | YPDnc4 | EtOHnc1 | EtOHnc2 | Galnc1 | Galnc2 |
| 13 | HIS2  | YFR025C   | YPDcl2 | YPDcl3 | EtOHcl1 | EtOHcl2 | Galcl1 | YPDnc1 | YPDnc2 | YPDnc3 | YPDnc4 | EtOHnc1 | EtOHnc2 | Galnc1 | Galnc2 |
| 13 | PDR17 | YNL264C   | YPDcl2 | YPDcl3 | EtOHcl1 | EtOHcl2 | Galcl1 | YPDnc1 | YPDnc2 | YPDnc3 | YPDnc4 | EtOHnc1 | EtOHnc2 | Galnc1 | Galnc2 |
| 13 | IMP3  | YHR148W   | YPDcl2 | YPDcl3 | EtOHcl1 | EtOHcl2 | Galcl1 | YPDnc1 | YPDnc2 | YPDnc3 | YPDnc4 | EtOHnc1 | EtOHnc2 | Galnc1 | Galnc2 |
| 13 |       | YIL165C   | YPDcl2 | YPDcl3 | EtOHcl1 | EtOHcl2 | Galcl1 | YPDnc1 | YPDnc2 | YPDnc3 | YPDnc4 | EtOHnc1 | EtOHnc2 | Galnc1 | Galnc2 |

|    |        |          |        |        |         |         |        |        |        |        |        |         |         |        |        |
|----|--------|----------|--------|--------|---------|---------|--------|--------|--------|--------|--------|---------|---------|--------|--------|
| 13 | CYR1   | YJL005W  | YPDcl2 | YPDcl3 | EtOHcl1 | EtOHcl2 | Galcl1 | YPDnc1 | YPDnc2 | YPDnc3 | YPDnc4 | EtOHnc1 | EtOHnc2 | Galnc1 | Galnc2 |
| 13 | STE5   | YDR103W  | YPDcl2 | YPDcl3 | EtOHcl1 | EtOHcl2 | Galcl1 | YPDnc1 | YPDnc2 | YPDnc3 | YPDnc4 | EtOHnc1 | EtOHnc2 | Galnc1 | Galnc2 |
| 13 | ASF1   | YJL115W  | YPDcl2 | YPDcl3 | EtOHcl1 | EtOHcl2 | Galcl1 | YPDnc1 | YPDnc2 | YPDnc3 | YPDnc4 | EtOHnc1 | EtOHnc2 | Galnc1 | Galnc2 |
| 13 | PDC1   | YLR044C  | YPDcl2 | YPDcl3 | EtOHcl1 | EtOHcl2 | Galcl1 | YPDnc1 | YPDnc2 | YPDnc3 | YPDnc4 | EtOHnc1 | EtOHnc2 | Galnc1 | Galnc2 |
| 13 | MUS81  | YDR386W  | YPDcl2 | YPDcl3 | EtOHcl1 | EtOHcl2 | Galcl1 | YPDnc1 | YPDnc2 | YPDnc3 | YPDnc4 | EtOHnc1 | EtOHnc2 | Galnc1 | Galnc2 |
| 13 | FMP33  | YJL161W  | YPDcl2 | YPDcl3 | EtOHcl1 | EtOHcl2 | Galcl1 | YPDnc1 | YPDnc2 | YPDnc3 | YPDnc4 | EtOHnc1 | EtOHnc2 | Galnc1 | Galnc2 |
| 13 | JJ3    | YJR097W  | YPDcl2 | YPDcl3 | EtOHcl1 | EtOHcl2 | Galcl1 | YPDnc1 | YPDnc2 | YPDnc3 | YPDnc4 | EtOHnc1 | EtOHnc2 | Galnc1 | Galnc2 |
| 13 | MRS1   | YIR021W  | YPDcl2 | YPDcl3 | EtOHcl1 | EtOHcl2 | Galcl1 | YPDnc1 | YPDnc2 | YPDnc3 | YPDnc4 | EtOHnc1 | EtOHnc2 | Galnc1 | Galnc2 |
| 13 |        | YCR047W- | YPDcl2 | YPDcl3 | EtOHcl1 | EtOHcl2 | Galcl1 | YPDnc1 | YPDnc2 | YPDnc3 | YPDnc4 | EtOHnc1 | EtOHnc2 | Galnc1 | Galnc2 |
| 13 | SEC65  | YML105C  | YPDcl2 | YPDcl3 | EtOHcl1 | EtOHcl2 | Galcl1 | YPDnc1 | YPDnc2 | YPDnc3 | YPDnc4 | EtOHnc1 | EtOHnc2 | Galnc1 | Galnc2 |
| 13 | UGP1   | YKL035W  | YPDcl2 | YPDcl3 | EtOHcl1 | EtOHcl2 | Galcl1 | YPDnc1 | YPDnc2 | YPDnc3 | YPDnc4 | EtOHnc1 | EtOHnc2 | Galnc1 | Galnc2 |
| 13 | DOP1   | YDR141C  | YPDcl2 | YPDcl3 | EtOHcl1 | EtOHcl2 | Galcl1 | YPDnc1 | YPDnc2 | YPDnc3 | YPDnc4 | EtOHnc1 | EtOHnc2 | Galnc1 | Galnc2 |
| 13 | CFT2   | YLR115W  | YPDcl2 | YPDcl3 | EtOHcl1 | EtOHcl2 | Galcl1 | YPDnc1 | YPDnc2 | YPDnc3 | YPDnc4 | EtOHnc1 | EtOHnc2 | Galnc1 | Galnc2 |
| 13 | COQ3   | YOL096C  | YPDcl2 | YPDcl3 | EtOHcl1 | EtOHcl2 | Galcl1 | YPDnc1 | YPDnc2 | YPDnc3 | YPDnc4 | EtOHnc1 | EtOHnc2 | Galnc1 | Galnc2 |
| 13 | MGA1   | YGR249W  | YPDcl2 | YPDcl3 | EtOHcl1 | EtOHcl2 | Galcl1 | YPDnc1 | YPDnc2 | YPDnc3 | YPDnc4 | EtOHnc1 | EtOHnc2 | Galnc1 | Galnc2 |
| 13 | YPP1   | YGR198W  | YPDcl2 | YPDcl3 | EtOHcl1 | EtOHcl2 | Galcl1 | YPDnc1 | YPDnc2 | YPDnc3 | YPDnc4 | EtOHnc1 | EtOHnc2 | Galnc1 | Galnc2 |
| 13 | SPT7   | YBR081C  | YPDcl2 | YPDcl3 | EtOHcl1 | EtOHcl2 | Galcl1 | YPDnc1 | YPDnc2 | YPDnc3 | YPDnc4 | EtOHnc1 | EtOHnc2 | Galnc1 | Galnc2 |
| 13 | MRPL50 | YNR022C  | YPDcl2 | YPDcl3 | EtOHcl1 | EtOHcl2 | Galcl1 | YPDnc1 | YPDnc2 | YPDnc3 | YPDnc4 | EtOHnc1 | EtOHnc2 | Galnc1 | Galnc2 |
| 13 | LYS14  | YDR034C  | YPDcl2 | YPDcl3 | EtOHcl1 | EtOHcl2 | Galcl1 | YPDnc1 | YPDnc2 | YPDnc3 | YPDnc4 | EtOHnc1 | EtOHnc2 | Galnc1 | Galnc2 |
| 13 |        | YOR352W  | YPDcl2 | YPDcl3 | EtOHcl1 | EtOHcl2 | Galcl1 | YPDnc1 | YPDnc2 | YPDnc3 | YPDnc4 | EtOHnc1 | EtOHnc2 | Galnc1 | Galnc2 |
| 13 | PRP9   | YDL030W  | YPDcl2 | YPDcl3 | EtOHcl1 | EtOHcl2 | Galcl1 | YPDnc1 | YPDnc2 | YPDnc3 | YPDnc4 | EtOHnc1 | EtOHnc2 | Galnc1 | Galnc2 |
| 13 | DEP1   | YAL013W  | YPDcl2 | YPDcl3 | EtOHcl1 | EtOHcl2 | Galcl1 | YPDnc1 | YPDnc2 | YPDnc3 | YPDnc4 | EtOHnc1 | EtOHnc2 | Galnc1 | Galnc2 |
| 13 |        | YLR294C  | YPDcl2 | YPDcl3 | EtOHcl1 | EtOHcl2 | Galcl1 | YPDnc1 | YPDnc2 | YPDnc3 | YPDnc4 | EtOHnc1 | EtOHnc2 | Galnc1 | Galnc2 |
| 13 | BET4   | YJL031C  | YPDcl2 | YPDcl3 | EtOHcl1 | EtOHcl2 | Galcl1 | YPDnc1 | YPDnc2 | YPDnc3 | YPDnc4 | EtOHnc1 | EtOHnc2 | Galnc1 | Galnc2 |
| 13 | HBS1   | YKR084C  | YPDcl2 | YPDcl3 | EtOHcl1 | EtOHcl2 | Galcl1 | YPDnc1 | YPDnc2 | YPDnc3 | YPDnc4 | EtOHnc1 | EtOHnc2 | Galnc1 | Galnc2 |
| 13 | QRI7   | YDL104C  | YPDcl2 | YPDcl3 | EtOHcl1 | EtOHcl2 | Galcl1 | YPDnc1 | YPDnc2 | YPDnc3 | YPDnc4 | EtOHnc1 | EtOHnc2 | Galnc1 | Galnc2 |
| 13 |        | YGR174W- | YPDcl2 | YPDcl3 | EtOHcl1 | EtOHcl2 | Galcl1 | YPDnc1 | YPDnc2 | YPDnc3 | YPDnc4 | EtOHnc1 | EtOHnc2 | Galnc1 | Galnc2 |
| 13 |        | YBL008W- | YPDcl2 | YPDcl3 | EtOHcl1 | EtOHcl2 | Galcl1 | YPDnc1 | YPDnc2 | YPDnc3 | YPDnc4 | EtOHnc1 | EtOHnc2 | Galnc1 | Galnc2 |
| 13 | RER2   | YBR002C  | YPDcl2 | YPDcl3 | EtOHcl1 | EtOHcl2 | Galcl1 | YPDnc1 | YPDnc2 | YPDnc3 | YPDnc4 | EtOHnc1 | EtOHnc2 | Galnc1 | Galnc2 |
| 13 |        | YDR119W- | YPDcl2 | YPDcl3 | EtOHcl1 | EtOHcl2 | Galcl1 | YPDnc1 | YPDnc2 | YPDnc3 | YPDnc4 | EtOHnc1 | EtOHnc2 | Galnc1 | Galnc2 |
| 13 | LSM12  | YHR121W  | YPDcl2 | YPDcl3 | EtOHcl1 | EtOHcl2 | Galcl1 | YPDnc1 | YPDnc2 | YPDnc3 | YPDnc4 | EtOHnc1 | EtOHnc2 | Galnc1 | Galnc2 |
| 13 | GTT3   | YEL017W  | YPDcl2 | YPDcl3 | EtOHcl1 | EtOHcl2 | Galcl1 | YPDnc1 | YPDnc2 | YPDnc3 | YPDnc4 | EtOHnc1 | EtOHnc2 | Galnc1 | Galnc2 |
| 13 | COX9   | YDL067C  | YPDcl2 | YPDcl3 | EtOHcl1 | EtOHcl2 | Galcl1 | YPDnc1 | YPDnc2 | YPDnc3 | YPDnc4 | EtOHnc1 | EtOHnc2 | Galnc1 | Galnc2 |
| 13 | ACB1   | YGR037C  | YPDcl2 | YPDcl3 | EtOHcl1 | EtOHcl2 | Galcl1 | YPDnc1 | YPDnc2 | YPDnc3 | YPDnc4 | EtOHnc1 | EtOHnc2 | Galnc1 | Galnc2 |

|          |          |        |        |         |         |        |        |        |        |        |         |         |        |        |
|----------|----------|--------|--------|---------|---------|--------|--------|--------|--------|--------|---------|---------|--------|--------|
| 13 SCY1  | YGL083W  | YPDcl2 | YPDcl3 | EtOHcl1 | EtOHcl2 | Galcl1 | YPDnc1 | YPDnc2 | YPDnc3 | YPDnc4 | EtOHnc1 | EtOHnc2 | Galnc1 | Galnc2 |
| 13 GFD2  | YCL036W  | YPDcl2 | YPDcl3 | EtOHcl1 | EtOHcl2 | Galcl1 | YPDnc1 | YPDnc2 | YPDnc3 | YPDnc4 | EtOHnc1 | EtOHnc2 | Galnc1 | Galnc2 |
| 13 ELC1  | YPL046C  | YPDcl2 | YPDcl3 | EtOHcl1 | EtOHcl2 | Galcl1 | YPDnc1 | YPDnc2 | YPDnc3 | YPDnc4 | EtOHnc1 | EtOHnc2 | Galnc1 | Galnc2 |
| 13 MAK32 | YCR019W  | YPDcl2 | YPDcl3 | EtOHcl1 | EtOHcl2 | Galcl1 | YPDnc1 | YPDnc2 | YPDnc3 | YPDnc4 | EtOHnc1 | EtOHnc2 | Galnc1 | Galnc2 |
| 13 LAA1  | YJL207C  | YPDcl2 | YPDcl3 | EtOHcl1 | EtOHcl2 | Galcl1 | YPDnc1 | YPDnc2 | YPDnc3 | YPDnc4 | EtOHnc1 | EtOHnc2 | Galnc1 | Galnc2 |
| 13 AST1  | YBL069W  | YPDcl2 | YPDcl3 | EtOHcl1 | EtOHcl2 | Galcl1 | YPDnc1 | YPDnc2 | YPDnc3 | YPDnc4 | EtOHnc1 | EtOHnc2 | Galnc1 | Galnc2 |
| 13 PRT1  | YOR361C  | YPDcl2 | YPDcl3 | EtOHcl1 | EtOHcl2 | Galcl1 | YPDnc1 | YPDnc2 | YPDnc3 | YPDnc4 | EtOHnc1 | EtOHnc2 | Galnc1 | Galnc2 |
| 13 SET3  | YKR029C  | YPDcl2 | YPDcl3 | EtOHcl1 | EtOHcl2 | Galcl1 | YPDnc1 | YPDnc2 | YPDnc3 | YPDnc4 | EtOHnc1 | EtOHnc2 | Galnc1 | Galnc2 |
| 13 NDC1  | YML031W  | YPDcl2 | YPDcl3 | EtOHcl1 | EtOHcl2 | Galcl1 | YPDnc1 | YPDnc2 | YPDnc3 | YPDnc4 | EtOHnc1 | EtOHnc2 | Galnc1 | Galnc2 |
| 13       | YNR014W  | YPDcl2 | YPDcl3 | EtOHcl1 | EtOHcl2 | Galcl1 | YPDnc1 | YPDnc2 | YPDnc3 | YPDnc4 | EtOHnc1 | EtOHnc2 | Galnc1 | Galnc2 |
| 13 POL12 | YBL035C  | YPDcl2 | YPDcl3 | EtOHcl1 | EtOHcl2 | Galcl1 | YPDnc1 | YPDnc2 | YPDnc3 | YPDnc4 | EtOHnc1 | EtOHnc2 | Galnc1 | Galnc2 |
| 13 TRP5  | YGL026C  | YPDcl2 | YPDcl3 | EtOHcl1 | EtOHcl2 | Galcl1 | YPDnc1 | YPDnc2 | YPDnc3 | YPDnc4 | EtOHnc1 | EtOHnc2 | Galnc1 | Galnc2 |
| 13 SAP1  | YER047C  | YPDcl2 | YPDcl3 | EtOHcl1 | EtOHcl2 | Galcl1 | YPDnc1 | YPDnc2 | YPDnc3 | YPDnc4 | EtOHnc1 | EtOHnc2 | Galnc1 | Galnc2 |
| 13 RML2  | YEL050C  | YPDcl2 | YPDcl3 | EtOHcl1 | EtOHcl2 | Galcl1 | YPDnc1 | YPDnc2 | YPDnc3 | YPDnc4 | EtOHnc1 | EtOHnc2 | Galnc1 | Galnc2 |
| 13       | YKL136W  | YPDcl2 | YPDcl3 | EtOHcl1 | EtOHcl2 | Galcl1 | YPDnc1 | YPDnc2 | YPDnc3 | YPDnc4 | EtOHnc1 | EtOHnc2 | Galnc1 | Galnc2 |
| 13 RSM25 | YIL093C  | YPDcl2 | YPDcl3 | EtOHcl1 | EtOHcl2 | Galcl1 | YPDnc1 | YPDnc2 | YPDnc3 | YPDnc4 | EtOHnc1 | EtOHnc2 | Galnc1 | Galnc2 |
| 13 LUC7  | YDL087C  | YPDcl2 | YPDcl3 | EtOHcl1 | EtOHcl2 | Galcl1 | YPDnc1 | YPDnc2 | YPDnc3 | YPDnc4 | EtOHnc1 | EtOHnc2 | Galnc1 | Galnc2 |
| 13 SUP45 | YBR143C  | YPDcl2 | YPDcl3 | EtOHcl1 | EtOHcl2 | Galcl1 | YPDnc1 | YPDnc2 | YPDnc3 | YPDnc4 | EtOHnc1 | EtOHnc2 | Galnc1 | Galnc2 |
| 13       | YDR374W- | YPDcl2 | YPDcl3 | EtOHcl1 | EtOHcl2 | Galcl1 | YPDnc1 | YPDnc2 | YPDnc3 | YPDnc4 | EtOHnc1 | EtOHnc2 | Galnc1 | Galnc2 |
| 13       | YNR068C  | YPDcl2 | YPDcl3 | EtOHcl1 | EtOHcl2 | Galcl1 | YPDnc1 | YPDnc2 | YPDnc3 | YPDnc4 | EtOHnc1 | EtOHnc2 | Galnc1 | Galnc2 |
| 13 CCT5  | YJR064W  | YPDcl2 | YPDcl3 | EtOHcl1 | EtOHcl2 | Galcl1 | YPDnc1 | YPDnc2 | YPDnc3 | YPDnc4 | EtOHnc1 | EtOHnc2 | Galnc1 | Galnc2 |
| 13       | YGR035W- | YPDcl2 | YPDcl3 | EtOHcl1 | EtOHcl2 | Galcl1 | YPDnc1 | YPDnc2 | YPDnc3 | YPDnc4 | EtOHnc1 | EtOHnc2 | Galnc1 | Galnc2 |
| 13 CAF20 | YOR276W  | YPDcl2 | YPDcl3 | EtOHcl1 | EtOHcl2 | Galcl1 | YPDnc1 | YPDnc2 | YPDnc3 | YPDnc4 | EtOHnc1 | EtOHnc2 | Galnc1 | Galnc2 |
| 13 APL6  | YGR261C  | YPDcl2 | YPDcl3 | EtOHcl1 | EtOHcl2 | Galcl1 | YPDnc1 | YPDnc2 | YPDnc3 | YPDnc4 | EtOHnc1 | EtOHnc2 | Galnc1 | Galnc2 |
| 13 SFT2  | YBL102W  | YPDcl2 | YPDcl3 | EtOHcl1 | EtOHcl2 | Galcl1 | YPDnc1 | YPDnc2 | YPDnc3 | YPDnc4 | EtOHnc1 | EtOHnc2 | Galnc1 | Galnc2 |
| 13 SQT1  | YIR012W  | YPDcl2 | YPDcl3 | EtOHcl1 | EtOHcl2 | Galcl1 | YPDnc1 | YPDnc2 | YPDnc3 | YPDnc4 | EtOHnc1 | EtOHnc2 | Galnc1 | Galnc2 |
| 13 SAC6  | YDR129C  | YPDcl2 | YPDcl3 | EtOHcl1 | EtOHcl2 | Galcl1 | YPDnc1 | YPDnc2 | YPDnc3 | YPDnc4 | EtOHnc1 | EtOHnc2 | Galnc1 | Galnc2 |
| 13 ERG3  | YLR056W  | YPDcl2 | YPDcl3 | EtOHcl1 | EtOHcl2 | Galcl1 | YPDnc1 | YPDnc2 | YPDnc3 | YPDnc4 | EtOHnc1 | EtOHnc2 | Galnc1 | Galnc2 |
| 13 GET2  | YER083C  | YPDcl2 | YPDcl3 | EtOHcl1 | EtOHcl2 | Galcl1 | YPDnc1 | YPDnc2 | YPDnc3 | YPDnc4 | EtOHnc1 | EtOHnc2 | Galnc1 | Galnc2 |
| 13       | YGL132W  | YPDcl2 | YPDcl3 | EtOHcl1 | EtOHcl2 | Galcl1 | YPDnc1 | YPDnc2 | YPDnc3 | YPDnc4 | EtOHnc1 | EtOHnc2 | Galnc1 | Galnc2 |
| 13 TEL2  | YGR099W  | YPDcl2 | YPDcl3 | EtOHcl1 | EtOHcl2 | Galcl1 | YPDnc1 | YPDnc2 | YPDnc3 | YPDnc4 | EtOHnc1 | EtOHnc2 | Galnc1 | Galnc2 |
| 13 NTA1  | YJR062C  | YPDcl2 | YPDcl3 | EtOHcl1 | EtOHcl2 | Galcl1 | YPDnc1 | YPDnc2 | YPDnc3 | YPDnc4 | EtOHnc1 | EtOHnc2 | Galnc1 | Galnc2 |
| 13 APP1  | YNL094W  | YPDcl2 | YPDcl3 | EtOHcl1 | EtOHcl2 | Galcl1 | YPDnc1 | YPDnc2 | YPDnc3 | YPDnc4 | EtOHnc1 | EtOHnc2 | Galnc1 | Galnc2 |
| 13 HCH1  | YNL281W  | YPDcl2 | YPDcl3 | EtOHcl1 | EtOHcl2 | Galcl1 | YPDnc1 | YPDnc2 | YPDnc3 | YPDnc4 | EtOHnc1 | EtOHnc2 | Galnc1 | Galnc2 |

|           |           |        |        |         |         |        |        |        |        |        |         |         |        |        |
|-----------|-----------|--------|--------|---------|---------|--------|--------|--------|--------|--------|---------|---------|--------|--------|
| 13        | YHR022C   | YPDcl2 | YPDcl3 | EtOHcl1 | EtOHcl2 | Galcl1 | YPDnc1 | YPDnc2 | YPDnc3 | YPDnc4 | EtOHnc1 | EtOHnc2 | Galnc1 | Galnc2 |
| 13        | YDR320W-  | YPDcl2 | YPDcl3 | EtOHcl1 | EtOHcl2 | Galcl1 | YPDnc1 | YPDnc2 | YPDnc3 | YPDnc4 | EtOHnc1 | EtOHnc2 | Galnc1 | Galnc2 |
| 13 PAU5   | YFL020C   | YPDcl2 | YPDcl3 | EtOHcl1 | EtOHcl2 | Galcl1 | YPDnc1 | YPDnc2 | YPDnc3 | YPDnc4 | EtOHnc1 | EtOHnc2 | Galnc1 | Galnc2 |
| 13 QCR10  | YHR001W-  | YPDcl2 | YPDcl3 | EtOHcl1 | EtOHcl2 | Galcl1 | YPDnc1 | YPDnc2 | YPDnc3 | YPDnc4 | EtOHnc1 | EtOHnc2 | Galnc1 | Galnc2 |
| 13 SNU23  | YDL098C   | YPDcl2 | YPDcl3 | EtOHcl1 | EtOHcl2 | Galcl1 | YPDnc1 | YPDnc2 | YPDnc3 | YPDnc4 | EtOHnc1 | EtOHnc2 | Galnc1 | Galnc2 |
| 13 NMA2   | YGR010W   | YPDcl2 | YPDcl3 | EtOHcl1 | EtOHcl2 | Galcl1 | YPDnc1 | YPDnc2 | YPDnc3 | YPDnc4 | EtOHnc1 | EtOHnc2 | Galnc1 | Galnc2 |
| 13        | YGL024W   | YPDcl2 | YPDcl3 | EtOHcl1 | EtOHcl2 | Galcl1 | YPDnc1 | YPDnc2 | YPDnc3 | YPDnc4 | EtOHnc1 | EtOHnc2 | Galnc1 | Galnc2 |
| 13 PDR5   | YOR153W   | YPDcl2 | YPDcl3 | EtOHcl1 | EtOHcl2 | Galcl1 | YPDnc1 | YPDnc2 | YPDnc3 | YPDnc4 | EtOHnc1 | EtOHnc2 | Galnc1 | Galnc2 |
| 13 MUM2   | YBR057C   | YPDcl2 | YPDcl3 | EtOHcl1 | EtOHcl2 | Galcl1 | YPDnc1 | YPDnc2 | YPDnc3 | YPDnc4 | EtOHnc1 | EtOHnc2 | Galnc1 | Galnc2 |
| 13 SVL3   | YPL032C   | YPDcl2 | YPDcl3 | EtOHcl1 | EtOHcl2 | Galcl1 | YPDnc1 | YPDnc2 | YPDnc3 | YPDnc4 | EtOHnc1 | EtOHnc2 | Galnc1 | Galnc2 |
| 13 SMF3   | YLR034C   | YPDcl2 | YPDcl3 | EtOHcl1 | EtOHcl2 | Galcl1 | YPDnc1 | YPDnc2 | YPDnc3 | YPDnc4 | EtOHnc1 | EtOHnc2 | Galnc1 | Galnc2 |
| 13        | YOR277C   | YPDcl2 | YPDcl3 | EtOHcl1 | EtOHcl2 | Galcl1 | YPDnc1 | YPDnc2 | YPDnc3 | YPDnc4 | EtOHnc1 | EtOHnc2 | Galnc1 | Galnc2 |
| 13 CHO2   | YGR157W   | YPDcl2 | YPDcl3 | EtOHcl1 | EtOHcl2 | Galcl1 | YPDnc1 | YPDnc2 | YPDnc3 | YPDnc4 | EtOHnc1 | EtOHnc2 | Galnc1 | Galnc2 |
| 13        | YCL047C   | YPDcl2 | YPDcl3 | EtOHcl1 | EtOHcl2 | Galcl1 | YPDnc1 | YPDnc2 | YPDnc3 | YPDnc4 | EtOHnc1 | EtOHnc2 | Galnc1 | Galnc2 |
| 13        | YNL213C   | YPDcl2 | YPDcl3 | EtOHcl1 | EtOHcl2 | Galcl1 | YPDnc1 | YPDnc2 | YPDnc3 | YPDnc4 | EtOHnc1 | EtOHnc2 | Galnc1 | Galnc2 |
| 13 RPL19B | YBL027W   | YPDcl2 | YPDcl3 | EtOHcl1 | EtOHcl2 | Galcl1 | YPDnc1 | YPDnc2 | YPDnc3 | YPDnc4 | EtOHnc1 | EtOHnc2 | Galnc1 | Galnc2 |
| 13        | YMR018W   | YPDcl2 | YPDcl3 | EtOHcl1 | EtOHcl2 | Galcl1 | YPDnc1 | YPDnc2 | YPDnc3 | YPDnc4 | EtOHnc1 | EtOHnc2 | Galnc1 | Galnc2 |
| 13 KEL2   | YGR238C   | YPDcl2 | YPDcl3 | EtOHcl1 | EtOHcl2 | Galcl1 | YPDnc1 | YPDnc2 | YPDnc3 | YPDnc4 | EtOHnc1 | EtOHnc2 | Galnc1 | Galnc2 |
| 13 SHE2   | YKL130C   | YPDcl2 | YPDcl3 | EtOHcl1 | EtOHcl2 | Galcl1 | YPDnc1 | YPDnc2 | YPDnc3 | YPDnc4 | EtOHnc1 | EtOHnc2 | Galnc1 | Galnc2 |
| 13 BIO3   | YNR058W   | YPDcl2 | YPDcl3 | EtOHcl1 | EtOHcl2 | Galcl1 | YPDnc1 | YPDnc2 | YPDnc3 | YPDnc4 | EtOHnc1 | EtOHnc2 | Galnc1 | Galnc2 |
| 13 NUP188 | YML103C   | YPDcl2 | YPDcl3 | EtOHcl1 | EtOHcl2 | Galcl1 | YPDnc1 | YPDnc2 | YPDnc3 | YPDnc4 | EtOHnc1 | EtOHnc2 | Galnc1 | Galnc2 |
| 13        | YOR305W   | YPDcl2 | YPDcl3 | EtOHcl1 | EtOHcl2 | Galcl1 | YPDnc1 | YPDnc2 | YPDnc3 | YPDnc4 | EtOHnc1 | EtOHnc2 | Galnc1 | Galnc2 |
| 13 TAF14  | YPL129W   | YPDcl2 | YPDcl3 | EtOHcl1 | EtOHcl2 | Galcl1 | YPDnc1 | YPDnc2 | YPDnc3 | YPDnc4 | EtOHnc1 | EtOHnc2 | Galnc1 | Galnc2 |
| 13 REX2   | YLR059C   | YPDcl2 | YPDcl3 | EtOHcl1 | EtOHcl2 | Galcl1 | YPDnc1 | YPDnc2 | YPDnc3 | YPDnc4 | EtOHnc1 | EtOHnc2 | Galnc1 | Galnc2 |
| 13 LAS1   | YKR063C   | YPDcl2 | YPDcl3 | EtOHcl1 | EtOHcl2 | Galcl1 | YPDnc1 | YPDnc2 | YPDnc3 | YPDnc4 | EtOHnc1 | EtOHnc2 | Galnc1 | Galnc2 |
| 13        | YPR003C   | YPDcl2 | YPDcl3 | EtOHcl1 | EtOHcl2 | Galcl1 | YPDnc1 | YPDnc2 | YPDnc3 | YPDnc4 | EtOHnc1 | EtOHnc2 | Galnc1 | Galnc2 |
| 13        | YDR461C-A | YPDcl2 | YPDcl3 | EtOHcl1 | EtOHcl2 | Galcl1 | YPDnc1 | YPDnc2 | YPDnc3 | YPDnc4 | EtOHnc1 | EtOHnc2 | Galnc1 | Galnc2 |
| 13        | YIL082W   | YPDcl2 | YPDcl3 | EtOHcl1 | EtOHcl2 | Galcl1 | YPDnc1 | YPDnc2 | YPDnc3 | YPDnc4 | EtOHnc1 | EtOHnc2 | Galnc1 | Galnc2 |
| 13 ASC1   | YMR116C   | YPDcl2 | YPDcl3 | EtOHcl1 | EtOHcl2 | Galcl1 | YPDnc1 | YPDnc2 | YPDnc3 | YPDnc4 | EtOHnc1 | EtOHnc2 | Galnc1 | Galnc2 |
| 13 CWP1   | YKL096W   | YPDcl2 | YPDcl3 | EtOHcl1 | EtOHcl2 | Galcl1 | YPDnc1 | YPDnc2 | YPDnc3 | YPDnc4 | EtOHnc1 | EtOHnc2 | Galnc1 | Galnc2 |
| 13        | YKL091C   | YPDcl2 | YPDcl3 | EtOHcl1 | EtOHcl2 | Galcl1 | YPDnc1 | YPDnc2 | YPDnc3 | YPDnc4 | EtOHnc1 | EtOHnc2 | Galnc1 | Galnc2 |
| 13 SPB1   | YCL054W   | YPDcl2 | YPDcl3 | EtOHcl1 | EtOHcl2 | Galcl1 | YPDnc1 | YPDnc2 | YPDnc3 | YPDnc4 | EtOHnc1 | EtOHnc2 | Galnc1 | Galnc2 |
| 13 FMS1   | YMR020W   | YPDcl2 | YPDcl3 | EtOHcl1 | EtOHcl2 | Galcl1 | YPDnc1 | YPDnc2 | YPDnc3 | YPDnc4 | EtOHnc1 | EtOHnc2 | Galnc1 | Galnc2 |
| 13 DIB1   | YPR082C   | YPDcl2 | YPDcl3 | EtOHcl1 | EtOHcl2 | Galcl1 | YPDnc1 | YPDnc2 | YPDnc3 | YPDnc4 | EtOHnc1 | EtOHnc2 | Galnc1 | Galnc2 |

|           |           |        |        |         |         |        |        |        |        |        |         |         |        |        |
|-----------|-----------|--------|--------|---------|---------|--------|--------|--------|--------|--------|---------|---------|--------|--------|
| 13 STD1   | YOR047C   | YPDcl2 | YPDcl3 | EtOHcl1 | EtOHcl2 | Galcl1 | YPDnc1 | YPDnc2 | YPDnc3 | YPDnc4 | EtOHnc1 | EtOHnc2 | Galnc1 | Galnc2 |
| 13 INO2   | YDR123C   | YPDcl2 | YPDcl3 | EtOHcl1 | EtOHcl2 | Galcl1 | YPDnc1 | YPDnc2 | YPDnc3 | YPDnc4 | EtOHnc1 | EtOHnc2 | Galnc1 | Galnc2 |
| 13        | YBR196C-B | YPDcl2 | YPDcl3 | EtOHcl1 | EtOHcl2 | Galcl1 | YPDnc1 | YPDnc2 | YPDnc3 | YPDnc4 | EtOHnc1 | EtOHnc2 | Galnc1 | Galnc2 |
| 13 ORC5   | YNL261W   | YPDcl2 | YPDcl3 | EtOHcl1 | EtOHcl2 | Galcl1 | YPDnc1 | YPDnc2 | YPDnc3 | YPDnc4 | EtOHnc1 | EtOHnc2 | Galnc1 | Galnc2 |
| 13        | YML003W   | YPDcl2 | YPDcl3 | EtOHcl1 | EtOHcl2 | Galcl1 | YPDnc1 | YPDnc2 | YPDnc3 | YPDnc4 | EtOHnc1 | EtOHnc2 | Galnc1 | Galnc2 |
| 13 TID3   | YIL144W   | YPDcl2 | YPDcl3 | EtOHcl1 | EtOHcl2 | Galcl1 | YPDnc1 | YPDnc2 | YPDnc3 | YPDnc4 | EtOHnc1 | EtOHnc2 | Galnc1 | Galnc2 |
| 13 VPS21  | YOR089C   | YPDcl2 | YPDcl3 | EtOHcl1 | EtOHcl2 | Galcl1 | YPDnc1 | YPDnc2 | YPDnc3 | YPDnc4 | EtOHnc1 | EtOHnc2 | Galnc1 | Galnc2 |
| 13 ARP7   | YPR034W   | YPDcl2 | YPDcl3 | EtOHcl1 | EtOHcl2 | Galcl1 | YPDnc1 | YPDnc2 | YPDnc3 | YPDnc4 | EtOHnc1 | EtOHnc2 | Galnc1 | Galnc2 |
| 13 RPL40A | YIL148W   | YPDcl2 | YPDcl3 | EtOHcl1 | EtOHcl2 | Galcl1 | YPDnc1 | YPDnc2 | YPDnc3 | YPDnc4 | EtOHnc1 | EtOHnc2 | Galnc1 | Galnc2 |
| 13        | YMR316C-F | YPDcl2 | YPDcl3 | EtOHcl1 | EtOHcl2 | Galcl1 | YPDnc1 | YPDnc2 | YPDnc3 | YPDnc4 | EtOHnc1 | EtOHnc2 | Galnc1 | Galnc2 |
| 13        | YGR122C-A | YPDcl2 | YPDcl3 | EtOHcl1 | EtOHcl2 | Galcl1 | YPDnc1 | YPDnc2 | YPDnc3 | YPDnc4 | EtOHnc1 | EtOHnc2 | Galnc1 | Galnc2 |
| 13 ARL1   | YBR164C   | YPDcl2 | YPDcl3 | EtOHcl1 | EtOHcl2 | Galcl1 | YPDnc1 | YPDnc2 | YPDnc3 | YPDnc4 | EtOHnc1 | EtOHnc2 | Galnc1 | Galnc2 |
| 13 SAM37  | YMR060C   | YPDcl2 | YPDcl3 | EtOHcl1 | EtOHcl2 | Galcl1 | YPDnc1 | YPDnc2 | YPDnc3 | YPDnc4 | EtOHnc1 | EtOHnc2 | Galnc1 | Galnc2 |
| 13 SEC28  | YIL076W   | YPDcl2 | YPDcl3 | EtOHcl1 | EtOHcl2 | Galcl1 | YPDnc1 | YPDnc2 | YPDnc3 | YPDnc4 | EtOHnc1 | EtOHnc2 | Galnc1 | Galnc2 |
| 13 GAC1   | YOR178C   | YPDcl2 | YPDcl3 | EtOHcl1 | EtOHcl2 | Galcl1 | YPDnc1 | YPDnc2 | YPDnc3 | YPDnc4 | EtOHnc1 | EtOHnc2 | Galnc1 | Galnc2 |
| 13        | YBR109W-  | YPDcl2 | YPDcl3 | EtOHcl1 | EtOHcl2 | Galcl1 | YPDnc1 | YPDnc2 | YPDnc3 | YPDnc4 | EtOHnc1 | EtOHnc2 | Galnc1 | Galnc2 |
| 13 MTD1   | YKR080W   | YPDcl2 | YPDcl3 | EtOHcl1 | EtOHcl2 | Galcl1 | YPDnc1 | YPDnc2 | YPDnc3 | YPDnc4 | EtOHnc1 | EtOHnc2 | Galnc1 | Galnc2 |
| 13 RTT102 | YGR275W   | YPDcl2 | YPDcl3 | EtOHcl1 | EtOHcl2 | Galcl1 | YPDnc1 | YPDnc2 | YPDnc3 | YPDnc4 | EtOHnc1 | EtOHnc2 | Galnc1 | Galnc2 |
| 13 SLI1   | YGR212W   | YPDcl2 | YPDcl3 | EtOHcl1 | EtOHcl2 | Galcl1 | YPDnc1 | YPDnc2 | YPDnc3 | YPDnc4 | EtOHnc1 | EtOHnc2 | Galnc1 | Galnc2 |
| 13        | YJR115W   | YPDcl2 | YPDcl3 | EtOHcl1 | EtOHcl2 | Galcl1 | YPDnc1 | YPDnc2 | YPDnc3 | YPDnc4 | EtOHnc1 | EtOHnc2 | Galnc1 | Galnc2 |
| 13        | YPL225W   | YPDcl2 | YPDcl3 | EtOHcl1 | EtOHcl2 | Galcl1 | YPDnc1 | YPDnc2 | YPDnc3 | YPDnc4 | EtOHnc1 | EtOHnc2 | Galnc1 | Galnc2 |
| 13 ICY1   | YMR195W   | YPDcl2 | YPDcl3 | EtOHcl1 | EtOHcl2 | Galcl1 | YPDnc1 | YPDnc2 | YPDnc3 | YPDnc4 | EtOHnc1 | EtOHnc2 | Galnc1 | Galnc2 |
| 13 MSS18  | YPR134W   | YPDcl2 | YPDcl3 | EtOHcl1 | EtOHcl2 | Galcl1 | YPDnc1 | YPDnc2 | YPDnc3 | YPDnc4 | EtOHnc1 | EtOHnc2 | Galnc1 | Galnc2 |
| 13 CDC34  | YDR054C   | YPDcl2 | YPDcl3 | EtOHcl1 | EtOHcl2 | Galcl1 | YPDnc1 | YPDnc2 | YPDnc3 | YPDnc4 | EtOHnc1 | EtOHnc2 | Galnc1 | Galnc2 |
| 13        | YDL119C   | YPDcl2 | YPDcl3 | EtOHcl1 | EtOHcl2 | Galcl1 | YPDnc1 | YPDnc2 | YPDnc3 | YPDnc4 | EtOHnc1 | EtOHnc2 | Galnc1 | Galnc2 |
| 13 SMC1   | YFL008W   | YPDcl2 | YPDcl3 | EtOHcl1 | EtOHcl2 | Galcl1 | YPDnc1 | YPDnc2 | YPDnc3 | YPDnc4 | EtOHnc1 | EtOHnc2 | Galnc1 | Galnc2 |
| 13 PEX31  | YGR004W   | YPDcl2 | YPDcl3 | EtOHcl1 | EtOHcl2 | Galcl1 | YPDnc1 | YPDnc2 | YPDnc3 | YPDnc4 | EtOHnc1 | EtOHnc2 | Galnc1 | Galnc2 |
| 13 ATM1   | YMR301C   | YPDcl2 | YPDcl3 | EtOHcl1 | EtOHcl2 | Galcl1 | YPDnc1 | YPDnc2 | YPDnc3 | YPDnc4 | EtOHnc1 | EtOHnc2 | Galnc1 | Galnc2 |
| 13        | YIL046W-A | YPDcl2 | YPDcl3 | EtOHcl1 | EtOHcl2 | Galcl1 | YPDnc1 | YPDnc2 | YPDnc3 | YPDnc4 | EtOHnc1 | EtOHnc2 | Galnc1 | Galnc2 |
| 13        | YPR116W   | YPDcl2 | YPDcl3 | EtOHcl1 | EtOHcl2 | Galcl1 | YPDnc1 | YPDnc2 | YPDnc3 | YPDnc4 | EtOHnc1 | EtOHnc2 | Galnc1 | Galnc2 |
| 13 ITR2   | YOL103W   | YPDcl2 | YPDcl3 | EtOHcl1 | EtOHcl2 | Galcl1 | YPDnc1 | YPDnc2 | YPDnc3 | YPDnc4 | EtOHnc1 | EtOHnc2 | Galnc1 | Galnc2 |
| 13        | YDR199W   | YPDcl2 | YPDcl3 | EtOHcl1 | EtOHcl2 | Galcl1 | YPDnc1 | YPDnc2 | YPDnc3 | YPDnc4 | EtOHnc1 | EtOHnc2 | Galnc1 | Galnc2 |
| 13 VAC14  | YLR386W   | YPDcl2 | YPDcl3 | EtOHcl1 | EtOHcl2 | Galcl1 | YPDnc1 | YPDnc2 | YPDnc3 | YPDnc4 | EtOHnc1 | EtOHnc2 | Galnc1 | Galnc2 |
| 13        | YNL143C   | YPDcl2 | YPDcl3 | EtOHcl1 | EtOHcl2 | Galcl1 | YPDnc1 | YPDnc2 | YPDnc3 | YPDnc4 | EtOHnc1 | EtOHnc2 | Galnc1 | Galnc2 |

|    |        |           |        |        |         |         |        |        |        |        |        |         |         |        |        |
|----|--------|-----------|--------|--------|---------|---------|--------|--------|--------|--------|--------|---------|---------|--------|--------|
| 13 | SCO1   | YBR037C   | YPDcl2 | YPDcl3 | EtOHcl1 | EtOHcl2 | Galcl1 | YPDnc1 | YPDnc2 | YPDnc3 | YPDnc4 | EtOHnc1 | EtOHnc2 | Galnc1 | Galnc2 |
| 13 |        | YER181C   | YPDcl2 | YPDcl3 | EtOHcl1 | EtOHcl2 | Galcl1 | YPDnc1 | YPDnc2 | YPDnc3 | YPDnc4 | EtOHnc1 | EtOHnc2 | Galnc1 | Galnc2 |
| 13 |        | YFR045W   | YPDcl2 | YPDcl3 | EtOHcl1 | EtOHcl2 | Galcl1 | YPDnc1 | YPDnc2 | YPDnc3 | YPDnc4 | EtOHnc1 | EtOHnc2 | Galnc1 | Galnc2 |
| 13 | ASN1   | YPR145W   | YPDcl2 | YPDcl3 | EtOHcl1 | EtOHcl2 | Galcl1 | YPDnc1 | YPDnc2 | YPDnc3 | YPDnc4 | EtOHnc1 | EtOHnc2 | Galnc1 | Galnc2 |
| 13 | PKR1   | YMR123W   | YPDcl2 | YPDcl3 | EtOHcl1 | EtOHcl2 | Galcl1 | YPDnc1 | YPDnc2 | YPDnc3 | YPDnc4 | EtOHnc1 | EtOHnc2 | Galnc1 | Galnc2 |
| 13 | CPA1   | YOR303W   | YPDcl2 | YPDcl3 | EtOHcl1 | EtOHcl2 | Galcl1 | YPDnc1 | YPDnc2 | YPDnc3 | YPDnc4 | EtOHnc1 | EtOHnc2 | Galnc1 | Galnc2 |
| 13 | TRZ1   | YKR079C   | YPDcl2 | YPDcl3 | EtOHcl1 | EtOHcl2 | Galcl1 | YPDnc1 | YPDnc2 | YPDnc3 | YPDnc4 | EtOHnc1 | EtOHnc2 | Galnc1 | Galnc2 |
| 13 | ORC3   | YLL004W   | YPDcl2 | YPDcl3 | EtOHcl1 | EtOHcl2 | Galcl1 | YPDnc1 | YPDnc2 | YPDnc3 | YPDnc4 | EtOHnc1 | EtOHnc2 | Galnc1 | Galnc2 |
| 13 | RSA3   | YLR221C   | YPDcl2 | YPDcl3 | EtOHcl1 | EtOHcl2 | Galcl1 | YPDnc1 | YPDnc2 | YPDnc3 | YPDnc4 | EtOHnc1 | EtOHnc2 | Galnc1 | Galnc2 |
| 13 | SRL4   | YPL033C   | YPDcl2 | YPDcl3 | EtOHcl1 | EtOHcl2 | Galcl1 | YPDnc1 | YPDnc2 | YPDnc3 | YPDnc4 | EtOHnc1 | EtOHnc2 | Galnc1 | Galnc2 |
| 13 | INN1   | YNL152W   | YPDcl2 | YPDcl3 | EtOHcl1 | EtOHcl2 | Galcl1 | YPDnc1 | YPDnc2 | YPDnc3 | YPDnc4 | EtOHnc1 | EtOHnc2 | Galnc1 | Galnc2 |
| 13 | SUI1   | YNL244C   | YPDcl2 | YPDcl3 | EtOHcl1 | EtOHcl2 | Galcl1 | YPDnc1 | YPDnc2 | YPDnc3 | YPDnc4 | EtOHnc1 | EtOHnc2 | Galnc1 | Galnc2 |
| 13 | CCT7   | YJL111W   | YPDcl2 | YPDcl3 | EtOHcl1 | EtOHcl2 | Galcl1 | YPDnc1 | YPDnc2 | YPDnc3 | YPDnc4 | EtOHnc1 | EtOHnc2 | Galnc1 | Galnc2 |
| 13 | FPR1   | YNL135C   | YPDcl2 | YPDcl3 | EtOHcl1 | EtOHcl2 | Galcl1 | YPDnc1 | YPDnc2 | YPDnc3 | YPDnc4 | EtOHnc1 | EtOHnc2 | Galnc1 | Galnc2 |
| 13 | RPS20  | YHL015W   | YPDcl2 | YPDcl3 | EtOHcl1 | EtOHcl2 | Galcl1 | YPDnc1 | YPDnc2 | YPDnc3 | YPDnc4 | EtOHnc1 | EtOHnc2 | Galnc1 | Galnc2 |
| 13 | IMP2'  | YIL154C   | YPDcl2 | YPDcl3 | EtOHcl1 | EtOHcl2 | Galcl1 | YPDnc1 | YPDnc2 | YPDnc3 | YPDnc4 | EtOHnc1 | EtOHnc2 | Galnc1 | Galnc2 |
| 13 | ALY2   | YJL084C   | YPDcl2 | YPDcl3 | EtOHcl1 | EtOHcl2 | Galcl1 | YPDnc1 | YPDnc2 | YPDnc3 | YPDnc4 | EtOHnc1 | EtOHnc2 | Galnc1 | Galnc2 |
| 13 | VAN1   | YML115C   | YPDcl2 | YPDcl3 | EtOHcl1 | EtOHcl2 | Galcl1 | YPDnc1 | YPDnc2 | YPDnc3 | YPDnc4 | EtOHnc1 | EtOHnc2 | Galnc1 | Galnc2 |
| 13 | DPB3   | YBR278W   | YPDcl2 | YPDcl3 | EtOHcl1 | EtOHcl2 | Galcl1 | YPDnc1 | YPDnc2 | YPDnc3 | YPDnc4 | EtOHnc1 | EtOHnc2 | Galnc1 | Galnc2 |
| 13 |        | YJL150W   | YPDcl2 | YPDcl3 | EtOHcl1 | EtOHcl2 | Galcl1 | YPDnc1 | YPDnc2 | YPDnc3 | YPDnc4 | EtOHnc1 | EtOHnc2 | Galnc1 | Galnc2 |
| 13 | FMN1   | YDR236C   | YPDcl2 | YPDcl3 | EtOHcl1 | EtOHcl2 | Galcl1 | YPDnc1 | YPDnc2 | YPDnc3 | YPDnc4 | EtOHnc1 | EtOHnc2 | Galnc1 | Galnc2 |
| 13 | GDB1   | YPR184W   | YPDcl2 | YPDcl3 | EtOHcl1 | EtOHcl2 | Galcl1 | YPDnc1 | YPDnc2 | YPDnc3 | YPDnc4 | EtOHnc1 | EtOHnc2 | Galnc1 | Galnc2 |
| 13 |        | YDR371C-A | YPDcl2 | YPDcl3 | EtOHcl1 | EtOHcl2 | Galcl1 | YPDnc1 | YPDnc2 | YPDnc3 | YPDnc4 | EtOHnc1 | EtOHnc2 | Galnc1 | Galnc2 |
| 13 | RPL35A | YDL191W   | YPDcl2 | YPDcl3 | EtOHcl1 | EtOHcl2 | Galcl1 | YPDnc1 | YPDnc2 | YPDnc3 | YPDnc4 | EtOHnc1 | EtOHnc2 | Galnc1 | Galnc2 |
| 13 |        | YPR145C-A | YPDcl2 | YPDcl3 | EtOHcl1 | EtOHcl2 | Galcl1 | YPDnc1 | YPDnc2 | YPDnc3 | YPDnc4 | EtOHnc1 | EtOHnc2 | Galnc1 | Galnc2 |
| 13 |        | YBR144C   | YPDcl2 | YPDcl3 | EtOHcl1 | EtOHcl2 | Galcl1 | YPDnc1 | YPDnc2 | YPDnc3 | YPDnc4 | EtOHnc1 | EtOHnc2 | Galnc1 | Galnc2 |
| 13 | RSC8   | YFR037C   | YPDcl2 | YPDcl3 | EtOHcl1 | EtOHcl2 | Galcl1 | YPDnc1 | YPDnc2 | YPDnc3 | YPDnc4 | EtOHnc1 | EtOHnc2 | Galnc1 | Galnc2 |
| 13 | OST1   | YJL002C   | YPDcl2 | YPDcl3 | EtOHcl1 | EtOHcl2 | Galcl1 | YPDnc1 | YPDnc2 | YPDnc3 | YPDnc4 | EtOHnc1 | EtOHnc2 | Galnc1 | Galnc2 |
| 13 | DUR3   | YHL016C   | YPDcl2 | YPDcl3 | EtOHcl1 | EtOHcl2 | Galcl1 | YPDnc1 | YPDnc2 | YPDnc3 | YPDnc4 | EtOHnc1 | EtOHnc2 | Galnc1 | Galnc2 |
| 13 | SLX4   | YLR135W   | YPDcl2 | YPDcl3 | EtOHcl1 | EtOHcl2 | Galcl1 | YPDnc1 | YPDnc2 | YPDnc3 | YPDnc4 | EtOHnc1 | EtOHnc2 | Galnc1 | Galnc2 |
| 13 | MPD2   | YOL088C   | YPDcl2 | YPDcl3 | EtOHcl1 | EtOHcl2 | Galcl1 | YPDnc1 | YPDnc2 | YPDnc3 | YPDnc4 | EtOHnc1 | EtOHnc2 | Galnc1 | Galnc2 |
| 13 | ELP3   | YPL086C   | YPDcl2 | YPDcl3 | EtOHcl1 | EtOHcl2 | Galcl1 | YPDnc1 | YPDnc2 | YPDnc3 | YPDnc4 | EtOHnc1 | EtOHnc2 | Galnc1 | Galnc2 |
| 13 |        | YBR027C   | YPDcl2 | YPDcl3 | EtOHcl1 | EtOHcl2 | Galcl1 | YPDnc1 | YPDnc2 | YPDnc3 | YPDnc4 | EtOHnc1 | EtOHnc2 | Galnc1 | Galnc2 |
| 13 | CHS3   | YBR023C   | YPDcl2 | YPDcl3 | EtOHcl1 | EtOHcl2 | Galcl1 | YPDnc1 | YPDnc2 | YPDnc3 | YPDnc4 | EtOHnc1 | EtOHnc2 | Galnc1 | Galnc2 |



|    |         |           |        |        |         |         |        |        |        |        |        |         |         |        |        |
|----|---------|-----------|--------|--------|---------|---------|--------|--------|--------|--------|--------|---------|---------|--------|--------|
| 13 | MND2    | YIR025W   | YPDcl2 | YPDcl3 | EtOHcl1 | EtOHcl2 | Galcl1 | YPDnc1 | YPDnc2 | YPDnc3 | YPDnc4 | EtOHnc1 | EtOHnc2 | Galnc1 | Galnc2 |
| 13 | APL2    | YKL135C   | YPDcl2 | YPDcl3 | EtOHcl1 | EtOHcl2 | Galcl1 | YPDnc1 | YPDnc2 | YPDnc3 | YPDnc4 | EtOHnc1 | EtOHnc2 | Galnc1 | Galnc2 |
| 13 | UBP8    | YMR223W   | YPDcl2 | YPDcl3 | EtOHcl1 | EtOHcl2 | Galcl1 | YPDnc1 | YPDnc2 | YPDnc3 | YPDnc4 | EtOHnc1 | EtOHnc2 | Galnc1 | Galnc2 |
| 13 |         | YML009C-A | YPDcl2 | YPDcl3 | EtOHcl1 | EtOHcl2 | Galcl1 | YPDnc1 | YPDnc2 | YPDnc3 | YPDnc4 | EtOHnc1 | EtOHnc2 | Galnc1 | Galnc2 |
| 13 | NAT1    | YDL040C   | YPDcl2 | YPDcl3 | EtOHcl1 | EtOHcl2 | Galcl1 | YPDnc1 | YPDnc2 | YPDnc3 | YPDnc4 | EtOHnc1 | EtOHnc2 | Galnc1 | Galnc2 |
| 13 |         | YBL071C-B | YPDcl2 | YPDcl3 | EtOHcl1 | EtOHcl2 | Galcl1 | YPDnc1 | YPDnc2 | YPDnc3 | YPDnc4 | EtOHnc1 | EtOHnc2 | Galnc1 | Galnc2 |
| 13 | MIF2    | YKL089W   | YPDcl2 | YPDcl3 | EtOHcl1 | EtOHcl2 | Galcl1 | YPDnc1 | YPDnc2 | YPDnc3 | YPDnc4 | EtOHnc1 | EtOHnc2 | Galnc1 | Galnc2 |
| 13 | LIP2    | YLR239C   | YPDcl2 | YPDcl3 | EtOHcl1 | EtOHcl2 | Galcl1 | YPDnc1 | YPDnc2 | YPDnc3 | YPDnc4 | EtOHnc1 | EtOHnc2 | Galnc1 | Galnc2 |
| 13 | VTC3    | YPL019C   | YPDcl2 | YPDcl3 | EtOHcl1 | EtOHcl2 | Galcl1 | YPDnc1 | YPDnc2 | YPDnc3 | YPDnc4 | EtOHnc1 | EtOHnc2 | Galnc1 | Galnc2 |
| 13 |         | YMR158W   | YPDcl2 | YPDcl3 | EtOHcl1 | EtOHcl2 | Galcl1 | YPDnc1 | YPDnc2 | YPDnc3 | YPDnc4 | EtOHnc1 | EtOHnc2 | Galnc1 | Galnc2 |
| 13 | APC9    | YLR102C   | YPDcl2 | YPDcl3 | EtOHcl1 | EtOHcl2 | Galcl1 | YPDnc1 | YPDnc2 | YPDnc3 | YPDnc4 | EtOHnc1 | EtOHnc2 | Galnc1 | Galnc2 |
| 13 | ARG2    | YJL071W   | YPDcl2 | YPDcl3 | EtOHcl1 | EtOHcl2 | Galcl1 | YPDnc1 | YPDnc2 | YPDnc3 | YPDnc4 | EtOHnc1 | EtOHnc2 | Galnc1 | Galnc2 |
| 13 | URA2    | YJL130C   | YPDcl2 | YPDcl3 | EtOHcl1 | EtOHcl2 | Galcl1 | YPDnc1 | YPDnc2 | YPDnc3 | YPDnc4 | EtOHnc1 | EtOHnc2 | Galnc1 | Galnc2 |
| 13 |         | YBR277C   | YPDcl2 | YPDcl3 | EtOHcl1 | EtOHcl2 | Galcl1 | YPDnc1 | YPDnc2 | YPDnc3 | YPDnc4 | EtOHnc1 | EtOHnc2 | Galnc1 | Galnc2 |
| 13 | CRT10   | YOL063C   | YPDcl2 | YPDcl3 | EtOHcl1 | EtOHcl2 | Galcl1 | YPDnc1 | YPDnc2 | YPDnc3 | YPDnc4 | EtOHnc1 | EtOHnc2 | Galnc1 | Galnc2 |
| 13 | TIF4632 | YGL049C   | YPDcl2 | YPDcl3 | EtOHcl1 | EtOHcl2 | Galcl1 | YPDnc1 | YPDnc2 | YPDnc3 | YPDnc4 | EtOHnc1 | EtOHnc2 | Galnc1 | Galnc2 |
| 13 | YIP1    | YGR172C   | YPDcl2 | YPDcl3 | EtOHcl1 | EtOHcl2 | Galcl1 | YPDnc1 | YPDnc2 | YPDnc3 | YPDnc4 | EtOHnc1 | EtOHnc2 | Galnc1 | Galnc2 |
| 13 |         | YGR111W   | YPDcl2 | YPDcl3 | EtOHcl1 | EtOHcl2 | Galcl1 | YPDnc1 | YPDnc2 | YPDnc3 | YPDnc4 | EtOHnc1 | EtOHnc2 | Galnc1 | Galnc2 |
| 13 | CKB2    | YOR039W   | YPDcl2 | YPDcl3 | EtOHcl1 | EtOHcl2 | Galcl1 | YPDnc1 | YPDnc2 | YPDnc3 | YPDnc4 | EtOHnc1 | EtOHnc2 | Galnc1 | Galnc2 |
| 13 | YDC1    | YPL087W   | YPDcl2 | YPDcl3 | EtOHcl1 | EtOHcl2 | Galcl1 | YPDnc1 | YPDnc2 | YPDnc3 | YPDnc4 | EtOHnc1 | EtOHnc2 | Galnc1 | Galnc2 |
| 13 | SRT1    | YMR101C   | YPDcl2 | YPDcl3 | EtOHcl1 | EtOHcl2 | Galcl1 | YPDnc1 | YPDnc2 | YPDnc3 | YPDnc4 | EtOHnc1 | EtOHnc2 | Galnc1 | Galnc2 |
| 13 | YCF1    | YDR135C   | YPDcl2 | YPDcl3 | EtOHcl1 | EtOHcl2 | Galcl1 | YPDnc1 | YPDnc2 | YPDnc3 | YPDnc4 | EtOHnc1 | EtOHnc2 | Galnc1 | Galnc2 |
| 13 | PUT3    | YKL015W   | YPDcl2 | YPDcl3 | EtOHcl1 | EtOHcl2 | Galcl1 | YPDnc1 | YPDnc2 | YPDnc3 | YPDnc4 | EtOHnc1 | EtOHnc2 | Galnc1 | Galnc2 |
| 13 | PSF3    | YOL146W   | YPDcl2 | YPDcl3 | EtOHcl1 | EtOHcl2 | Galcl1 | YPDnc1 | YPDnc2 | YPDnc3 | YPDnc4 | EtOHnc1 | EtOHnc2 | Galnc1 | Galnc2 |
| 13 | VAS1    | YGR094W   | YPDcl2 | YPDcl3 | EtOHcl1 | EtOHcl2 | Galcl1 | YPDnc1 | YPDnc2 | YPDnc3 | YPDnc4 | EtOHnc1 | EtOHnc2 | Galnc1 | Galnc2 |
| 13 | MID2    | YLR332W   | YPDcl2 | YPDcl3 | EtOHcl1 | EtOHcl2 | Galcl1 | YPDnc1 | YPDnc2 | YPDnc3 | YPDnc4 | EtOHnc1 | EtOHnc2 | Galnc1 | Galnc2 |
| 13 | SLX9    | YGR081C   | YPDcl2 | YPDcl3 | EtOHcl1 | EtOHcl2 | Galcl1 | YPDnc1 | YPDnc2 | YPDnc3 | YPDnc4 | EtOHnc1 | EtOHnc2 | Galnc1 | Galnc2 |
| 13 | TSC3    | YBR058C-A | YPDcl2 | YPDcl3 | EtOHcl1 | EtOHcl2 | Galcl1 | YPDnc1 | YPDnc2 | YPDnc3 | YPDnc4 | EtOHnc1 | EtOHnc2 | Galnc1 | Galnc2 |
| 13 | MTG2    | YHR168W   | YPDcl2 | YPDcl3 | EtOHcl1 | EtOHcl2 | Galcl1 | YPDnc1 | YPDnc2 | YPDnc3 | YPDnc4 | EtOHnc1 | EtOHnc2 | Galnc1 | Galnc2 |
| 13 | RPP1    | YHR062C   | YPDcl2 | YPDcl3 | EtOHcl1 | EtOHcl2 | Galcl1 | YPDnc1 | YPDnc2 | YPDnc3 | YPDnc4 | EtOHnc1 | EtOHnc2 | Galnc1 | Galnc2 |
| 13 | SOL4    | YGR248W   | YPDcl2 | YPDcl3 | EtOHcl1 | EtOHcl2 | Galcl1 | YPDnc1 | YPDnc2 | YPDnc3 | YPDnc4 | EtOHnc1 | EtOHnc2 | Galnc1 | Galnc2 |
| 13 | ARG1    | YOL058W   | YPDcl2 | YPDcl3 | EtOHcl1 | EtOHcl2 | Galcl1 | YPDnc1 | YPDnc2 | YPDnc3 | YPDnc4 | EtOHnc1 | EtOHnc2 | Galnc1 | Galnc2 |
| 13 | TUL1    | YKL034W   | YPDcl2 | YPDcl3 | EtOHcl1 | EtOHcl2 | Galcl1 | YPDnc1 | YPDnc2 | YPDnc3 | YPDnc4 | EtOHnc1 | EtOHnc2 | Galnc1 | Galnc2 |
| 13 | CIN4    | YMR138W   | YPDcl2 | YPDcl3 | EtOHcl1 | EtOHcl2 | Galcl1 | YPDnc1 | YPDnc2 | YPDnc3 | YPDnc4 | EtOHnc1 | EtOHnc2 | Galnc1 | Galnc2 |

|           |          |        |        |         |         |        |        |        |        |        |         |         |        |        |
|-----------|----------|--------|--------|---------|---------|--------|--------|--------|--------|--------|---------|---------|--------|--------|
| 13 RAD1   | YPL022W  | YPDcl2 | YPDcl3 | EtOHcl1 | EtOHcl2 | Galcl1 | YPDnc1 | YPDnc2 | YPDnc3 | YPDnc4 | EtOHnc1 | EtOHnc2 | Galnc1 | Galnc2 |
| 13 GZF3   | YJL110C  | YPDcl2 | YPDcl3 | EtOHcl1 | EtOHcl2 | Galcl1 | YPDnc1 | YPDnc2 | YPDnc3 | YPDnc4 | EtOHnc1 | EtOHnc2 | Galnc1 | Galnc2 |
| 13 SWH1   | YAR042W  | YPDcl2 | YPDcl3 | EtOHcl1 | EtOHcl2 | Galcl1 | YPDnc1 | YPDnc2 | YPDnc3 | YPDnc4 | EtOHnc1 | EtOHnc2 | Galnc1 | Galnc2 |
| 13        | YFL012W- | YPDcl2 | YPDcl3 | EtOHcl1 | EtOHcl2 | Galcl1 | YPDnc1 | YPDnc2 | YPDnc3 | YPDnc4 | EtOHnc1 | EtOHnc2 | Galnc1 | Galnc2 |
| 13 PRY2   | YKR013W  | YPDcl2 | YPDcl3 | EtOHcl1 | EtOHcl2 | Galcl1 | YPDnc1 | YPDnc2 | YPDnc3 | YPDnc4 | EtOHnc1 | EtOHnc2 | Galnc1 | Galnc2 |
| 13 SMC3   | YJL074C  | YPDcl2 | YPDcl3 | EtOHcl1 | EtOHcl2 | Galcl1 | YPDnc1 | YPDnc2 | YPDnc3 | YPDnc4 | EtOHnc1 | EtOHnc2 | Galnc1 | Galnc2 |
| 13 IKI3   | YLR384C  | YPDcl2 | YPDcl3 | EtOHcl1 | EtOHcl2 | Galcl1 | YPDnc1 | YPDnc2 | YPDnc3 | YPDnc4 | EtOHnc1 | EtOHnc2 | Galnc1 | Galnc2 |
| 13 MLC2   | YPR188C  | YPDcl2 | YPDcl3 | EtOHcl1 | EtOHcl2 | Galcl1 | YPDnc1 | YPDnc2 | YPDnc3 | YPDnc4 | EtOHnc1 | EtOHnc2 | Galnc1 | Galnc2 |
| 13 RGA1   | YOR127W  | YPDcl2 | YPDcl3 | EtOHcl1 | EtOHcl2 | Galcl1 | YPDnc1 | YPDnc2 | YPDnc3 | YPDnc4 | EtOHnc1 | EtOHnc2 | Galnc1 | Galnc2 |
| 13 OAF3   | YKR064W  | YPDcl2 | YPDcl3 | EtOHcl1 | EtOHcl2 | Galcl1 | YPDnc1 | YPDnc2 | YPDnc3 | YPDnc4 | EtOHnc1 | EtOHnc2 | Galnc1 | Galnc2 |
| 13 JAC1   | YGL018C  | YPDcl2 | YPDcl3 | EtOHcl1 | EtOHcl2 | Galcl1 | YPDnc1 | YPDnc2 | YPDnc3 | YPDnc4 | EtOHnc1 | EtOHnc2 | Galnc1 | Galnc2 |
| 13 PHO90  | YJL198W  | YPDcl2 | YPDcl3 | EtOHcl1 | EtOHcl2 | Galcl1 | YPDnc1 | YPDnc2 | YPDnc3 | YPDnc4 | EtOHnc1 | EtOHnc2 | Galnc1 | Galnc2 |
| 13 SYC1   | YOR179C  | YPDcl2 | YPDcl3 | EtOHcl1 | EtOHcl2 | Galcl1 | YPDnc1 | YPDnc2 | YPDnc3 | YPDnc4 | EtOHnc1 | EtOHnc2 | Galnc1 | Galnc2 |
| 13        | YBR134W  | YPDcl2 | YPDcl3 | EtOHcl1 | EtOHcl2 | Galcl1 | YPDnc1 | YPDnc2 | YPDnc3 | YPDnc4 | EtOHnc1 | EtOHnc2 | Galnc1 | Galnc2 |
| 13 SPT6   | YGR116W  | YPDcl2 | YPDcl3 | EtOHcl1 | EtOHcl2 | Galcl1 | YPDnc1 | YPDnc2 | YPDnc3 | YPDnc4 | EtOHnc1 | EtOHnc2 | Galnc1 | Galnc2 |
| 13 TRM44  | YPL030W  | YPDcl2 | YPDcl3 | EtOHcl1 | EtOHcl2 | Galcl1 | YPDnc1 | YPDnc2 | YPDnc3 | YPDnc4 | EtOHnc1 | EtOHnc2 | Galnc1 | Galnc2 |
| 13 ADE5,7 | YGL234W  | YPDcl2 | YPDcl3 | EtOHcl1 | EtOHcl2 | Galcl1 | YPDnc1 | YPDnc2 | YPDnc3 | YPDnc4 | EtOHnc1 | EtOHnc2 | Galnc1 | Galnc2 |
| 13 SWC4   | YGR002C  | YPDcl2 | YPDcl3 | EtOHcl1 | EtOHcl2 | Galcl1 | YPDnc1 | YPDnc2 | YPDnc3 | YPDnc4 | EtOHnc1 | EtOHnc2 | Galnc1 | Galnc2 |
| 13 URA10  | YMR271C  | YPDcl2 | YPDcl3 | EtOHcl1 | EtOHcl2 | Galcl1 | YPDnc1 | YPDnc2 | YPDnc3 | YPDnc4 | EtOHnc1 | EtOHnc2 | Galnc1 | Galnc2 |
| 13 CMD1   | YBR109C  | YPDcl2 | YPDcl3 | EtOHcl1 | EtOHcl2 | Galcl1 | YPDnc1 | YPDnc2 | YPDnc3 | YPDnc4 | EtOHnc1 | EtOHnc2 | Galnc1 | Galnc2 |
| 13 DIG2   | YDR480W  | YPDcl2 | YPDcl3 | EtOHcl1 | EtOHcl2 | Galcl1 | YPDnc1 | YPDnc2 | YPDnc3 | YPDnc4 | EtOHnc1 | EtOHnc2 | Galnc1 | Galnc2 |
| 13 AVT5   | YBL089W  | YPDcl2 | YPDcl3 | EtOHcl1 | EtOHcl2 | Galcl1 | YPDnc1 | YPDnc2 | YPDnc3 | YPDnc4 | EtOHnc1 | EtOHnc2 | Galnc1 | Galnc2 |
| 13 SHY1   | YGR112W  | YPDcl2 | YPDcl3 | EtOHcl1 | EtOHcl2 | Galcl1 | YPDnc1 | YPDnc2 | YPDnc3 | YPDnc4 | EtOHnc1 | EtOHnc2 | Galnc1 | Galnc2 |
| 13 YEH1   | YLL012W  | YPDcl2 | YPDcl3 | EtOHcl1 | EtOHcl2 | Galcl1 | YPDnc1 | YPDnc2 | YPDnc3 | YPDnc4 | EtOHnc1 | EtOHnc2 | Galnc1 | Galnc2 |
| 13        | YMR013C- | YPDcl2 | YPDcl3 | EtOHcl1 | EtOHcl2 | Galcl1 | YPDnc1 | YPDnc2 | YPDnc3 | YPDnc4 | EtOHnc1 | EtOHnc2 | Galnc1 | Galnc2 |
| 13 KSP1   | YHR082C  | YPDcl2 | YPDcl3 | EtOHcl1 | EtOHcl2 | Galcl1 | YPDnc1 | YPDnc2 | YPDnc3 | YPDnc4 | EtOHnc1 | EtOHnc2 | Galnc1 | Galnc2 |
| 13 GAT3   | YLR013W  | YPDcl2 | YPDcl3 | EtOHcl1 | EtOHcl2 | Galcl1 | YPDnc1 | YPDnc2 | YPDnc3 | YPDnc4 | EtOHnc1 | EtOHnc2 | Galnc1 | Galnc2 |
| 13 LRS4   | YDR439W  | YPDcl2 | YPDcl3 | EtOHcl1 | EtOHcl2 | Galcl1 | YPDnc1 | YPDnc2 | YPDnc3 | YPDnc4 | EtOHnc1 | EtOHnc2 | Galnc1 | Galnc2 |
| 13 YPS7   | YDR349C  | YPDcl2 | YPDcl3 | EtOHcl1 | EtOHcl2 | Galcl1 | YPDnc1 | YPDnc2 | YPDnc3 | YPDnc4 | EtOHnc1 | EtOHnc2 | Galnc1 | Galnc2 |
| 13        | YLR408C  | YPDcl2 | YPDcl3 | EtOHcl1 | EtOHcl2 | Galcl1 | YPDnc1 | YPDnc2 | YPDnc3 | YPDnc4 | EtOHnc1 | EtOHnc2 | Galnc1 | Galnc2 |
| 13 MEI5   | YPL121C  | YPDcl2 | YPDcl3 | EtOHcl1 | EtOHcl2 | Galcl1 | YPDnc1 | YPDnc2 | YPDnc3 | YPDnc4 | EtOHnc1 | EtOHnc2 | Galnc1 | Galnc2 |
| 13        | YDR290W  | YPDcl2 | YPDcl3 | EtOHcl1 | EtOHcl2 | Galcl1 | YPDnc1 | YPDnc2 | YPDnc3 | YPDnc4 | EtOHnc1 | EtOHnc2 | Galnc1 | Galnc2 |
| 13 LEM3   | YNL323W  | YPDcl2 | YPDcl3 | EtOHcl1 | EtOHcl2 | Galcl1 | YPDnc1 | YPDnc2 | YPDnc3 | YPDnc4 | EtOHnc1 | EtOHnc2 | Galnc1 | Galnc2 |
| 13 ENO1   | YGR254W  | YPDcl2 | YPDcl3 | EtOHcl1 | EtOHcl2 | Galcl1 | YPDnc1 | YPDnc2 | YPDnc3 | YPDnc4 | EtOHnc1 | EtOHnc2 | Galnc1 | Galnc2 |

|           |           |        |        |         |         |        |        |        |        |        |         |         |        |        |
|-----------|-----------|--------|--------|---------|---------|--------|--------|--------|--------|--------|---------|---------|--------|--------|
| 13 PAN6   | YIL145C   | YPDcl2 | YPDcl3 | EtOHcl1 | EtOHcl2 | Galcl1 | YPDnc1 | YPDnc2 | YPDnc3 | YPDnc4 | EtOHnc1 | EtOHnc2 | Galnc1 | Galnc2 |
| 13        | YMR209C   | YPDcl2 | YPDcl3 | EtOHcl1 | EtOHcl2 | Galcl1 | YPDnc1 | YPDnc2 | YPDnc3 | YPDnc4 | EtOHnc1 | EtOHnc2 | Galnc1 | Galnc2 |
| 13 RNY1   | YPL123C   | YPDcl2 | YPDcl3 | EtOHcl1 | EtOHcl2 | Galcl1 | YPDnc1 | YPDnc2 | YPDnc3 | YPDnc4 | EtOHnc1 | EtOHnc2 | Galnc1 | Galnc2 |
| 13 DAS1   | YJL149W   | YPDcl2 | YPDcl3 | EtOHcl1 | EtOHcl2 | Galcl1 | YPDnc1 | YPDnc2 | YPDnc3 | YPDnc4 | EtOHnc1 | EtOHnc2 | Galnc1 | Galnc2 |
| 13 AAD14  | YNL331C   | YPDcl2 | YPDcl3 | EtOHcl1 | EtOHcl2 | Galcl1 | YPDnc1 | YPDnc2 | YPDnc3 | YPDnc4 | EtOHnc1 | EtOHnc2 | Galnc1 | Galnc2 |
| 13 YCG1   | YDR325W   | YPDcl2 | YPDcl3 | EtOHcl1 | EtOHcl2 | Galcl1 | YPDnc1 | YPDnc2 | YPDnc3 | YPDnc4 | EtOHnc1 | EtOHnc2 | Galnc1 | Galnc2 |
| 13 HEM2   | YGL040C   | YPDcl2 | YPDcl3 | EtOHcl1 | EtOHcl2 | Galcl1 | YPDnc1 | YPDnc2 | YPDnc3 | YPDnc4 | EtOHnc1 | EtOHnc2 | Galnc1 | Galnc2 |
| 13 RPT4   | YOR259C   | YPDcl2 | YPDcl3 | EtOHcl1 | EtOHcl2 | Galcl1 | YPDnc1 | YPDnc2 | YPDnc3 | YPDnc4 | EtOHnc1 | EtOHnc2 | Galnc1 | Galnc2 |
| 13        | YDL085C-A | YPDcl2 | YPDcl3 | EtOHcl1 | EtOHcl2 | Galcl1 | YPDnc1 | YPDnc2 | YPDnc3 | YPDnc4 | EtOHnc1 | EtOHnc2 | Galnc1 | Galnc2 |
| 13 PRM3   | YPL192C   | YPDcl2 | YPDcl3 | EtOHcl1 | EtOHcl2 | Galcl1 | YPDnc1 | YPDnc2 | YPDnc3 | YPDnc4 | EtOHnc1 | EtOHnc2 | Galnc1 | Galnc2 |
| 13        | YER084W   | YPDcl2 | YPDcl3 | EtOHcl1 | EtOHcl2 | Galcl1 | YPDnc1 | YPDnc2 | YPDnc3 | YPDnc4 | EtOHnc1 | EtOHnc2 | Galnc1 | Galnc2 |
| 13 IDP3   | YNL009W   | YPDcl2 | YPDcl3 | EtOHcl1 | EtOHcl2 | Galcl1 | YPDnc1 | YPDnc2 | YPDnc3 | YPDnc4 | EtOHnc1 | EtOHnc2 | Galnc1 | Galnc2 |
| 13 AIM3   | YBR108W   | YPDcl2 | YPDcl3 | EtOHcl1 | EtOHcl2 | Galcl1 | YPDnc1 | YPDnc2 | YPDnc3 | YPDnc4 | EtOHnc1 | EtOHnc2 | Galnc1 | Galnc2 |
| 13 HOM6   | YJR139C   | YPDcl2 | YPDcl3 | EtOHcl1 | EtOHcl2 | Galcl1 | YPDnc1 | YPDnc2 | YPDnc3 | YPDnc4 | EtOHnc1 | EtOHnc2 | Galnc1 | Galnc2 |
| 13 SRP14  | YDL092W   | YPDcl2 | YPDcl3 | EtOHcl1 | EtOHcl2 | Galcl1 | YPDnc1 | YPDnc2 | YPDnc3 | YPDnc4 | EtOHnc1 | EtOHnc2 | Galnc1 | Galnc2 |
| 13 GYP6   | YJL044C   | YPDcl2 | YPDcl3 | EtOHcl1 | EtOHcl2 | Galcl1 | YPDnc1 | YPDnc2 | YPDnc3 | YPDnc4 | EtOHnc1 | EtOHnc2 | Galnc1 | Galnc2 |
| 13 FLD1   | YLR404W   | YPDcl2 | YPDcl3 | EtOHcl1 | EtOHcl2 | Galcl1 | YPDnc1 | YPDnc2 | YPDnc3 | YPDnc4 | EtOHnc1 | EtOHnc2 | Galnc1 | Galnc2 |
| 13        | YCL058W-A | YPDcl2 | YPDcl3 | EtOHcl1 | EtOHcl2 | Galcl1 | YPDnc1 | YPDnc2 | YPDnc3 | YPDnc4 | EtOHnc1 | EtOHnc2 | Galnc1 | Galnc2 |
| 13 RTT106 | YNL206C   | YPDcl2 | YPDcl3 | EtOHcl1 | EtOHcl2 | Galcl1 | YPDnc1 | YPDnc2 | YPDnc3 | YPDnc4 | EtOHnc1 | EtOHnc2 | Galnc1 | Galnc2 |
| 13 CDS1   | YBR029C   | YPDcl2 | YPDcl3 | EtOHcl1 | EtOHcl2 | Galcl1 | YPDnc1 | YPDnc2 | YPDnc3 | YPDnc4 | EtOHnc1 | EtOHnc2 | Galnc1 | Galnc2 |
| 13 BCS1   | YDR375C   | YPDcl2 | YPDcl3 | EtOHcl1 | EtOHcl2 | Galcl1 | YPDnc1 | YPDnc2 | YPDnc3 | YPDnc4 | EtOHnc1 | EtOHnc2 | Galnc1 | Galnc2 |
| 13 ANR2   | YKL047W   | YPDcl2 | YPDcl3 | EtOHcl1 | EtOHcl2 | Galcl1 | YPDnc1 | YPDnc2 | YPDnc3 | YPDnc4 | EtOHnc1 | EtOHnc2 | Galnc1 | Galnc2 |
| 13 STP3   | YLR375W   | YPDcl2 | YPDcl3 | EtOHcl1 | EtOHcl2 | Galcl1 | YPDnc1 | YPDnc2 | YPDnc3 | YPDnc4 | EtOHnc1 | EtOHnc2 | Galnc1 | Galnc2 |
| 13 RTC6   | YPL183W-A | YPDcl2 | YPDcl3 | EtOHcl1 | EtOHcl2 | Galcl1 | YPDnc1 | YPDnc2 | YPDnc3 | YPDnc4 | EtOHnc1 | EtOHnc2 | Galnc1 | Galnc2 |
| 13 RRD1   | YIL153W   | YPDcl2 | YPDcl3 | EtOHcl1 | EtOHcl2 | Galcl1 | YPDnc1 | YPDnc2 | YPDnc3 | YPDnc4 | EtOHnc1 | EtOHnc2 | Galnc1 | Galnc2 |
| 13        | YLR252W   | YPDcl2 | YPDcl3 | EtOHcl1 | EtOHcl2 | Galcl1 | YPDnc1 | YPDnc2 | YPDnc3 | YPDnc4 | EtOHnc1 | EtOHnc2 | Galnc1 | Galnc2 |
| 13        | YER010C   | YPDcl2 | YPDcl3 | EtOHcl1 | EtOHcl2 | Galcl1 | YPDnc1 | YPDnc2 | YPDnc3 | YPDnc4 | EtOHnc1 | EtOHnc2 | Galnc1 | Galnc2 |
| 13 ESP1   | YGR098C   | YPDcl2 | YPDcl3 | EtOHcl1 | EtOHcl2 | Galcl1 | YPDnc1 | YPDnc2 | YPDnc3 | YPDnc4 | EtOHnc1 | EtOHnc2 | Galnc1 | Galnc2 |
| 13 SKG6   | YHR149C   | YPDcl2 | YPDcl3 | EtOHcl1 | EtOHcl2 | Galcl1 | YPDnc1 | YPDnc2 | YPDnc3 | YPDnc4 | EtOHnc1 | EtOHnc2 | Galnc1 | Galnc2 |
| 13 SHR3   | YDL212W   | YPDcl2 | YPDcl3 | EtOHcl1 | EtOHcl2 | Galcl1 | YPDnc1 | YPDnc2 | YPDnc3 | YPDnc4 | EtOHnc1 | EtOHnc2 | Galnc1 | Galnc2 |
| 13        | YJL068C   | YPDcl2 | YPDcl3 | EtOHcl1 | EtOHcl2 | Galcl1 | YPDnc1 | YPDnc2 | YPDnc3 | YPDnc4 | EtOHnc1 | EtOHnc2 | Galnc1 | Galnc2 |
| 13 SCL1   | YGL011C   | YPDcl2 | YPDcl3 | EtOHcl1 | EtOHcl2 | Galcl1 | YPDnc1 | YPDnc2 | YPDnc3 | YPDnc4 | EtOHnc1 | EtOHnc2 | Galnc1 | Galnc2 |
| 13 CSE1   | YGL238W   | YPDcl2 | YPDcl3 | EtOHcl1 | EtOHcl2 | Galcl1 | YPDnc1 | YPDnc2 | YPDnc3 | YPDnc4 | EtOHnc1 | EtOHnc2 | Galnc1 | Galnc2 |
| 13 RFS1   | YBR052C   | YPDcl2 | YPDcl3 | EtOHcl1 | EtOHcl2 | Galcl1 | YPDnc1 | YPDnc2 | YPDnc3 | YPDnc4 | EtOHnc1 | EtOHnc2 | Galnc1 | Galnc2 |

|    |       |           |        |        |         |         |        |        |        |        |        |         |         |        |        |
|----|-------|-----------|--------|--------|---------|---------|--------|--------|--------|--------|--------|---------|---------|--------|--------|
| 13 | ASA1  | YPR085C   | YPDcl2 | YPDcl3 | EtOHcl1 | EtOHcl2 | Galcl1 | YPDnc1 | YPDnc2 | YPDnc3 | YPDnc4 | EtOHnc1 | EtOHnc2 | Galnc1 | Galnc2 |
| 13 | MET16 | YPR167C   | YPDcl2 | YPDcl3 | EtOHcl1 | EtOHcl2 | Galcl1 | YPDnc1 | YPDnc2 | YPDnc3 | YPDnc4 | EtOHnc1 | EtOHnc2 | Galnc1 | Galnc2 |
| 13 | CAJ1  | YER048C   | YPDcl2 | YPDcl3 | EtOHcl1 | EtOHcl2 | Galcl1 | YPDnc1 | YPDnc2 | YPDnc3 | YPDnc4 | EtOHnc1 | EtOHnc2 | Galnc1 | Galnc2 |
| 13 | DBP8  | YHR169W   | YPDcl2 | YPDcl3 | EtOHcl1 | EtOHcl2 | Galcl1 | YPDnc1 | YPDnc2 | YPDnc3 | YPDnc4 | EtOHnc1 | EtOHnc2 | Galnc1 | Galnc2 |
| 13 | SFH1  | YLR321C   | YPDcl2 | YPDcl3 | EtOHcl1 | EtOHcl2 | Galcl1 | YPDnc1 | YPDnc2 | YPDnc3 | YPDnc4 | EtOHnc1 | EtOHnc2 | Galnc1 | Galnc2 |
| 13 |       | YFL034W   | YPDcl2 | YPDcl3 | EtOHcl1 | EtOHcl2 | Galcl1 | YPDnc1 | YPDnc2 | YPDnc3 | YPDnc4 | EtOHnc1 | EtOHnc2 | Galnc1 | Galnc2 |
| 13 |       | YIR023C-A | YPDcl2 | YPDcl3 | EtOHcl1 | EtOHcl2 | Galcl1 | YPDnc1 | YPDnc2 | YPDnc3 | YPDnc4 | EtOHnc1 | EtOHnc2 | Galnc1 | Galnc2 |
| 13 |       | YIL032C   | YPDcl2 | YPDcl3 | EtOHcl1 | EtOHcl2 | Galcl1 | YPDnc1 | YPDnc2 | YPDnc3 | YPDnc4 | EtOHnc1 | EtOHnc2 | Galnc1 | Galnc2 |
| 13 | VPH1  | YOR270C   | YPDcl2 | YPDcl3 | EtOHcl1 | EtOHcl2 | Galcl1 | YPDnc1 | YPDnc2 | YPDnc3 | YPDnc4 | EtOHnc1 | EtOHnc2 | Galnc1 | Galnc2 |
| 13 |       | YNL184C   | YPDcl2 | YPDcl3 | EtOHcl1 | EtOHcl2 | Galcl1 | YPDnc1 | YPDnc2 | YPDnc3 | YPDnc4 | EtOHnc1 | EtOHnc2 | Galnc1 | Galnc2 |
| 13 | ACO1  | YLR304C   | YPDcl2 | YPDcl3 | EtOHcl1 | EtOHcl2 | Galcl1 | YPDnc1 | YPDnc2 | YPDnc3 | YPDnc4 | EtOHnc1 | EtOHnc2 | Galnc1 | Galnc2 |
| 13 | ATE1  | YGL017W   | YPDcl2 | YPDcl3 | EtOHcl1 | EtOHcl2 | Galcl1 | YPDnc1 | YPDnc2 | YPDnc3 | YPDnc4 | EtOHnc1 | EtOHnc2 | Galnc1 | Galnc2 |
| 13 |       | YHR145C   | YPDcl2 | YPDcl3 | EtOHcl1 | EtOHcl2 | Galcl1 | YPDnc1 | YPDnc2 | YPDnc3 | YPDnc4 | EtOHnc1 | EtOHnc2 | Galnc1 | Galnc2 |
| 13 |       | YDR133C   | YPDcl2 | YPDcl3 | EtOHcl1 | EtOHcl2 | Galcl1 | YPDnc1 | YPDnc2 | YPDnc3 | YPDnc4 | EtOHnc1 | EtOHnc2 | Galnc1 | Galnc2 |
| 13 | YVC1  | YOR087W   | YPDcl2 | YPDcl3 | EtOHcl1 | EtOHcl2 | Galcl1 | YPDnc1 | YPDnc2 | YPDnc3 | YPDnc4 | EtOHnc1 | EtOHnc2 | Galnc1 | Galnc2 |
| 13 | STE4  | YOR212W   | YPDcl2 | YPDcl3 | EtOHcl1 | EtOHcl2 | Galcl1 | YPDnc1 | YPDnc2 | YPDnc3 | YPDnc4 | EtOHnc1 | EtOHnc2 | Galnc1 | Galnc2 |
| 13 | HXK1  | YFR053C   | YPDcl2 | YPDcl3 | EtOHcl1 | EtOHcl2 | Galcl1 | YPDnc1 | YPDnc2 | YPDnc3 | YPDnc4 | EtOHnc1 | EtOHnc2 | Galnc1 | Galnc2 |
| 13 | FMC1  | YIL098C   | YPDcl2 | YPDcl3 | EtOHcl1 | EtOHcl2 | Galcl1 | YPDnc1 | YPDnc2 | YPDnc3 | YPDnc4 | EtOHnc1 | EtOHnc2 | Galnc1 | Galnc2 |
| 13 | MSC1  | YML128C   | YPDcl2 | YPDcl3 | EtOHcl1 | EtOHcl2 | Galcl1 | YPDnc1 | YPDnc2 | YPDnc3 | YPDnc4 | EtOHnc1 | EtOHnc2 | Galnc1 | Galnc2 |
| 13 | RRP6  | YOR001W   | YPDcl2 | YPDcl3 | EtOHcl1 | EtOHcl2 | Galcl1 | YPDnc1 | YPDnc2 | YPDnc3 | YPDnc4 | EtOHnc1 | EtOHnc2 | Galnc1 | Galnc2 |
| 13 | SAK1  | YER129W   | YPDcl2 | YPDcl3 | EtOHcl1 | EtOHcl2 | Galcl1 | YPDnc1 | YPDnc2 | YPDnc3 | YPDnc4 | EtOHnc1 | EtOHnc2 | Galnc1 | Galnc2 |
| 13 |       | YOR304C-A | YPDcl2 | YPDcl3 | EtOHcl1 | EtOHcl2 | Galcl1 | YPDnc1 | YPDnc2 | YPDnc3 | YPDnc4 | EtOHnc1 | EtOHnc2 | Galnc1 | Galnc2 |
| 13 | ECM15 | YBL001C   | YPDcl2 | YPDcl3 | EtOHcl1 | EtOHcl2 | Galcl1 | YPDnc1 | YPDnc2 | YPDnc3 | YPDnc4 | EtOHnc1 | EtOHnc2 | Galnc1 | Galnc2 |
| 13 | SGT1  | YOR057W   | YPDcl2 | YPDcl3 | EtOHcl1 | EtOHcl2 | Galcl1 | YPDnc1 | YPDnc2 | YPDnc3 | YPDnc4 | EtOHnc1 | EtOHnc2 | Galnc1 | Galnc2 |
| 13 | FRQ1  | YDR373W   | YPDcl2 | YPDcl3 | EtOHcl1 | EtOHcl2 | Galcl1 | YPDnc1 | YPDnc2 | YPDnc3 | YPDnc4 | EtOHnc1 | EtOHnc2 | Galnc1 | Galnc2 |
| 13 | PRP31 | YGR091W   | YPDcl2 | YPDcl3 | EtOHcl1 | EtOHcl2 | Galcl1 | YPDnc1 | YPDnc2 | YPDnc3 | YPDnc4 | EtOHnc1 | EtOHnc2 | Galnc1 | Galnc2 |
| 13 | CSF1  | YLR087C   | YPDcl2 | YPDcl3 | EtOHcl1 | EtOHcl2 | Galcl1 | YPDnc1 | YPDnc2 | YPDnc3 | YPDnc4 | EtOHnc1 | EtOHnc2 | Galnc1 | Galnc2 |
| 13 | CYS3  | YAL012W   | YPDcl2 | YPDcl3 | EtOHcl1 | EtOHcl2 | Galcl1 | YPDnc1 | YPDnc2 | YPDnc3 | YPDnc4 | EtOHnc1 | EtOHnc2 | Galnc1 | Galnc2 |
| 13 | IZH2  | YOL002C   | YPDcl2 | YPDcl3 | EtOHcl1 | EtOHcl2 | Galcl1 | YPDnc1 | YPDnc2 | YPDnc3 | YPDnc4 | EtOHnc1 | EtOHnc2 | Galnc1 | Galnc2 |
| 13 | RTF1  | YGL244W   | YPDcl2 | YPDcl3 | EtOHcl1 | EtOHcl2 | Galcl1 | YPDnc1 | YPDnc2 | YPDnc3 | YPDnc4 | EtOHnc1 | EtOHnc2 | Galnc1 | Galnc2 |
| 13 | GRX1  | YCL035C   | YPDcl2 | YPDcl3 | EtOHcl1 | EtOHcl2 | Galcl1 | YPDnc1 | YPDnc2 | YPDnc3 | YPDnc4 | EtOHnc1 | EtOHnc2 | Galnc1 | Galnc2 |
| 13 | URN1  | YPR152C   | YPDcl2 | YPDcl3 | EtOHcl1 | EtOHcl2 | Galcl1 | YPDnc1 | YPDnc2 | YPDnc3 | YPDnc4 | EtOHnc1 | EtOHnc2 | Galnc1 | Galnc2 |
| 13 | TFG2  | YGR005C   | YPDcl2 | YPDcl3 | EtOHcl1 | EtOHcl2 | Galcl1 | YPDnc1 | YPDnc2 | YPDnc3 | YPDnc4 | EtOHnc1 | EtOHnc2 | Galnc1 | Galnc2 |
| 13 | SUN4  | YNL066W   | YPDcl2 | YPDcl3 | EtOHcl1 | EtOHcl2 | Galcl1 | YPDnc1 | YPDnc2 | YPDnc3 | YPDnc4 | EtOHnc1 | EtOHnc2 | Galnc1 | Galnc2 |

|          |           |        |        |         |         |        |        |        |        |        |         |         |        |        |
|----------|-----------|--------|--------|---------|---------|--------|--------|--------|--------|--------|---------|---------|--------|--------|
| 13       | YNL235C   | YPDcl2 | YPDcl3 | EtOHcl1 | EtOHcl2 | Galcl1 | YPDnc1 | YPDnc2 | YPDnc3 | YPDnc4 | EtOHnc1 | EtOHnc2 | Galnc1 | Galnc2 |
| 13       | YOL092W   | YPDcl2 | YPDcl3 | EtOHcl1 | EtOHcl2 | Galcl1 | YPDnc1 | YPDnc2 | YPDnc3 | YPDnc4 | EtOHnc1 | EtOHnc2 | Galnc1 | Galnc2 |
| 13       | YJL107C   | YPDcl2 | YPDcl3 | EtOHcl1 | EtOHcl2 | Galcl1 | YPDnc1 | YPDnc2 | YPDnc3 | YPDnc4 | EtOHnc1 | EtOHnc2 | Galnc1 | Galnc2 |
| 13 ADD66 | YKL206C   | YPDcl2 | YPDcl3 | EtOHcl1 | EtOHcl2 | Galcl1 | YPDnc1 | YPDnc2 | YPDnc3 | YPDnc4 | EtOHnc1 | EtOHnc2 | Galnc1 | Galnc2 |
| 13       | YGL014C-A | YPDcl2 | YPDcl3 | EtOHcl1 | EtOHcl2 | Galcl1 | YPDnc1 | YPDnc2 | YPDnc3 | YPDnc4 | EtOHnc1 | EtOHnc2 | Galnc1 | Galnc2 |
| 13 MGR3  | YMR115W   | YPDcl2 | YPDcl3 | EtOHcl1 | EtOHcl2 | Galcl1 | YPDnc1 | YPDnc2 | YPDnc3 | YPDnc4 | EtOHnc1 | EtOHnc2 | Galnc1 | Galnc2 |
| 13       | YCL048W-A | YPDcl2 | YPDcl3 | EtOHcl1 | EtOHcl2 | Galcl1 | YPDnc1 | YPDnc2 | YPDnc3 | YPDnc4 | EtOHnc1 | EtOHnc2 | Galnc1 | Galnc2 |
| 13 VAB2  | YEL005C   | YPDcl2 | YPDcl3 | EtOHcl1 | EtOHcl2 | Galcl1 | YPDnc1 | YPDnc2 | YPDnc3 | YPDnc4 | EtOHnc1 | EtOHnc2 | Galnc1 | Galnc2 |
| 13 MET28 | YIR017C   | YPDcl2 | YPDcl3 | EtOHcl1 | EtOHcl2 | Galcl1 | YPDnc1 | YPDnc2 | YPDnc3 | YPDnc4 | EtOHnc1 | EtOHnc2 | Galnc1 | Galnc2 |
| 13 UBR1  | YGR184C   | YPDcl2 | YPDcl3 | EtOHcl1 | EtOHcl2 | Galcl1 | YPDnc1 | YPDnc2 | YPDnc3 | YPDnc4 | EtOHnc1 | EtOHnc2 | Galnc1 | Galnc2 |
| 13 PTM1  | YKL039W   | YPDcl2 | YPDcl3 | EtOHcl1 | EtOHcl2 | Galcl1 | YPDnc1 | YPDnc2 | YPDnc3 | YPDnc4 | EtOHnc1 | EtOHnc2 | Galnc1 | Galnc2 |
| 13 SCW11 | YGL028C   | YPDcl2 | YPDcl3 | EtOHcl1 | EtOHcl2 | Galcl1 | YPDnc1 | YPDnc2 | YPDnc3 | YPDnc4 | EtOHnc1 | EtOHnc2 | Galnc1 | Galnc2 |
| 13 SAS2  | YMR127C   | YPDcl2 | YPDcl3 | EtOHcl1 | EtOHcl2 | Galcl1 | YPDnc1 | YPDnc2 | YPDnc3 | YPDnc4 | EtOHnc1 | EtOHnc2 | Galnc1 | Galnc2 |
| 13 VHS1  | YDR247W   | YPDcl2 | YPDcl3 | EtOHcl1 | EtOHcl2 | Galcl1 | YPDnc1 | YPDnc2 | YPDnc3 | YPDnc4 | EtOHnc1 | EtOHnc2 | Galnc1 | Galnc2 |
| 13       | YBL029C-A | YPDcl2 | YPDcl3 | EtOHcl1 | EtOHcl2 | Galcl1 | YPDnc1 | YPDnc2 | YPDnc3 | YPDnc4 | EtOHnc1 | EtOHnc2 | Galnc1 | Galnc2 |
| 13 RSC4  | YKR008W   | YPDcl2 | YPDcl3 | EtOHcl1 | EtOHcl2 | Galcl1 | YPDnc1 | YPDnc2 | YPDnc3 | YPDnc4 | EtOHnc1 | EtOHnc2 | Galnc1 | Galnc2 |
| 13 IRC6  | YFR043C   | YPDcl2 | YPDcl3 | EtOHcl1 | EtOHcl2 | Galcl1 | YPDnc1 | YPDnc2 | YPDnc3 | YPDnc4 | EtOHnc1 | EtOHnc2 | Galnc1 | Galnc2 |
| 13       | YIL029C   | YPDcl2 | YPDcl3 | EtOHcl1 | EtOHcl2 | Galcl1 | YPDnc1 | YPDnc2 | YPDnc3 | YPDnc4 | EtOHnc1 | EtOHnc2 | Galnc1 | Galnc2 |
| 13 OSW1  | YOR255W   | YPDcl2 | YPDcl3 | EtOHcl1 | EtOHcl2 | Galcl1 | YPDnc1 | YPDnc2 | YPDnc3 | YPDnc4 | EtOHnc1 | EtOHnc2 | Galnc1 | Galnc2 |
| 13 RFA2  | YNL312W   | YPDcl2 | YPDcl3 | EtOHcl1 | EtOHcl2 | Galcl1 | YPDnc1 | YPDnc2 | YPDnc3 | YPDnc4 | EtOHnc1 | EtOHnc2 | Galnc1 | Galnc2 |
| 13 AST2  | YER101C   | YPDcl2 | YPDcl3 | EtOHcl1 | EtOHcl2 | Galcl1 | YPDnc1 | YPDnc2 | YPDnc3 | YPDnc4 | EtOHnc1 | EtOHnc2 | Galnc1 | Galnc2 |
| 13 GAS3  | YMR215W   | YPDcl2 | YPDcl3 | EtOHcl1 | EtOHcl2 | Galcl1 | YPDnc1 | YPDnc2 | YPDnc3 | YPDnc4 | EtOHnc1 | EtOHnc2 | Galnc1 | Galnc2 |
| 13 CPS1  | YJL172W   | YPDcl2 | YPDcl3 | EtOHcl1 | EtOHcl2 | Galcl1 | YPDnc1 | YPDnc2 | YPDnc3 | YPDnc4 | EtOHnc1 | EtOHnc2 | Galnc1 | Galnc2 |
| 13 BUR6  | YER159C   | YPDcl2 | YPDcl3 | EtOHcl1 | EtOHcl2 | Galcl1 | YPDnc1 | YPDnc2 | YPDnc3 | YPDnc4 | EtOHnc1 | EtOHnc2 | Galnc1 | Galnc2 |
| 13       | YEL047C   | YPDcl2 | YPDcl3 | EtOHcl1 | EtOHcl2 | Galcl1 | YPDnc1 | YPDnc2 | YPDnc3 | YPDnc4 | EtOHnc1 | EtOHnc2 | Galnc1 | Galnc2 |
| 13 ORC6  | YHR118C   | YPDcl2 | YPDcl3 | EtOHcl1 | EtOHcl2 | Galcl1 | YPDnc1 | YPDnc2 | YPDnc3 | YPDnc4 | EtOHnc1 | EtOHnc2 | Galnc1 | Galnc2 |
| 13 ATP7  | YKL016C   | YPDcl2 | YPDcl3 | EtOHcl1 | EtOHcl2 | Galcl1 | YPDnc1 | YPDnc2 | YPDnc3 | YPDnc4 | EtOHnc1 | EtOHnc2 | Galnc1 | Galnc2 |
| 13 TFB4  | YPR056W   | YPDcl2 | YPDcl3 | EtOHcl1 | EtOHcl2 | Galcl1 | YPDnc1 | YPDnc2 | YPDnc3 | YPDnc4 | EtOHnc1 | EtOHnc2 | Galnc1 | Galnc2 |
| 13       | YHL045W   | YPDcl2 | YPDcl3 | EtOHcl1 | EtOHcl2 | Galcl1 | YPDnc1 | YPDnc2 | YPDnc3 | YPDnc4 | EtOHnc1 | EtOHnc2 | Galnc1 | Galnc2 |
| 13 DER1  | YBR201W   | YPDcl2 | YPDcl3 | EtOHcl1 | EtOHcl2 | Galcl1 | YPDnc1 | YPDnc2 | YPDnc3 | YPDnc4 | EtOHnc1 | EtOHnc2 | Galnc1 | Galnc2 |
| 13 UBP5  | YER144C   | YPDcl2 | YPDcl3 | EtOHcl1 | EtOHcl2 | Galcl1 | YPDnc1 | YPDnc2 | YPDnc3 | YPDnc4 | EtOHnc1 | EtOHnc2 | Galnc1 | Galnc2 |
| 13 YPT10 | YBR264C   | YPDcl2 | YPDcl3 | EtOHcl1 | EtOHcl2 | Galcl1 | YPDnc1 | YPDnc2 | YPDnc3 | YPDnc4 | EtOHnc1 | EtOHnc2 | Galnc1 | Galnc2 |
| 13       | YDR239C   | YPDcl2 | YPDcl3 | EtOHcl1 | EtOHcl2 | Galcl1 | YPDnc1 | YPDnc2 | YPDnc3 | YPDnc4 | EtOHnc1 | EtOHnc2 | Galnc1 | Galnc2 |
| 13 PPZ1  | YML016C   | YPDcl2 | YPDcl3 | EtOHcl1 | EtOHcl2 | Galcl1 | YPDnc1 | YPDnc2 | YPDnc3 | YPDnc4 | EtOHnc1 | EtOHnc2 | Galnc1 | Galnc2 |

|    |         |           |        |         |         |         |        |        |        |        |         |         |         |        |        |
|----|---------|-----------|--------|---------|---------|---------|--------|--------|--------|--------|---------|---------|---------|--------|--------|
| 13 | YDL180W | YPDcl2    | YPDcl3 | EtOHcl1 | EtOHcl2 | Galcl1  | YPDnc1 | YPDnc2 | YPDnc3 | YPDnc4 | EtOHnc1 | EtOHnc2 | Galnc1  | Galnc2 |        |
| 13 | PCM1    | YEL058W   | YPDcl2 | YPDcl3  | EtOHcl1 | EtOHcl2 | Galcl1 | YPDnc1 | YPDnc2 | YPDnc3 | YPDnc4  | EtOHnc1 | EtOHnc2 | Galnc1 | Galnc2 |
| 13 | DPH5    | YLR172C   | YPDcl2 | YPDcl3  | EtOHcl1 | EtOHcl2 | Galcl1 | YPDnc1 | YPDnc2 | YPDnc3 | YPDnc4  | EtOHnc1 | EtOHnc2 | Galnc1 | Galnc2 |
| 13 | SCO2    | YBR024W   | YPDcl2 | YPDcl3  | EtOHcl1 | EtOHcl2 | Galcl1 | YPDnc1 | YPDnc2 | YPDnc3 | YPDnc4  | EtOHnc1 | EtOHnc2 | Galnc1 | Galnc2 |
| 13 | AHC1    | YOR023C   | YPDcl2 | YPDcl3  | EtOHcl1 | EtOHcl2 | Galcl1 | YPDnc1 | YPDnc2 | YPDnc3 | YPDnc4  | EtOHnc1 | EtOHnc2 | Galnc1 | Galnc2 |
| 13 | SET2    | YJL168C   | YPDcl2 | YPDcl3  | EtOHcl1 | EtOHcl2 | Galcl1 | YPDnc1 | YPDnc2 | YPDnc3 | YPDnc4  | EtOHnc1 | EtOHnc2 | Galnc1 | Galnc2 |
| 13 | PUS1    | YPL212C   | YPDcl2 | YPDcl3  | EtOHcl1 | EtOHcl2 | Galcl1 | YPDnc1 | YPDnc2 | YPDnc3 | YPDnc4  | EtOHnc1 | EtOHnc2 | Galnc1 | Galnc2 |
| 13 | SNX4    | YJL036W   | YPDcl2 | YPDcl3  | EtOHcl1 | EtOHcl2 | Galcl1 | YPDnc1 | YPDnc2 | YPDnc3 | YPDnc4  | EtOHnc1 | EtOHnc2 | Galnc1 | Galnc2 |
| 13 | BRX1    | YOL077C   | YPDcl2 | YPDcl3  | EtOHcl1 | EtOHcl2 | Galcl1 | YPDnc1 | YPDnc2 | YPDnc3 | YPDnc4  | EtOHnc1 | EtOHnc2 | Galnc1 | Galnc2 |
| 13 | ECM25   | YJL201W   | YPDcl2 | YPDcl3  | EtOHcl1 | EtOHcl2 | Galcl1 | YPDnc1 | YPDnc2 | YPDnc3 | YPDnc4  | EtOHnc1 | EtOHnc2 | Galnc1 | Galnc2 |
| 13 |         | YPL141C   | YPDcl2 | YPDcl3  | EtOHcl1 | EtOHcl2 | Galcl1 | YPDnc1 | YPDnc2 | YPDnc3 | YPDnc4  | EtOHnc1 | EtOHnc2 | Galnc1 | Galnc2 |
| 13 | CIT3    | YPR001W   | YPDcl2 | YPDcl3  | EtOHcl1 | EtOHcl2 | Galcl1 | YPDnc1 | YPDnc2 | YPDnc3 | YPDnc4  | EtOHnc1 | EtOHnc2 | Galnc1 | Galnc2 |
| 13 | CKS1    | YBR135W   | YPDcl2 | YPDcl3  | EtOHcl1 | EtOHcl2 | Galcl1 | YPDnc1 | YPDnc2 | YPDnc3 | YPDnc4  | EtOHnc1 | EtOHnc2 | Galnc1 | Galnc2 |
| 13 | PFS2    | YNL317W   | YPDcl2 | YPDcl3  | EtOHcl1 | EtOHcl2 | Galcl1 | YPDnc1 | YPDnc2 | YPDnc3 | YPDnc4  | EtOHnc1 | EtOHnc2 | Galnc1 | Galnc2 |
| 13 | IRC19   | YLL033W   | YPDcl2 | YPDcl3  | EtOHcl1 | EtOHcl2 | Galcl1 | YPDnc1 | YPDnc2 | YPDnc3 | YPDnc4  | EtOHnc1 | EtOHnc2 | Galnc1 | Galnc2 |
| 13 | FHL1    | YPR104C   | YPDcl2 | YPDcl3  | EtOHcl1 | EtOHcl2 | Galcl1 | YPDnc1 | YPDnc2 | YPDnc3 | YPDnc4  | EtOHnc1 | EtOHnc2 | Galnc1 | Galnc2 |
| 13 | HUT1    | YPL244C   | YPDcl2 | YPDcl3  | EtOHcl1 | EtOHcl2 | Galcl1 | YPDnc1 | YPDnc2 | YPDnc3 | YPDnc4  | EtOHnc1 | EtOHnc2 | Galnc1 | Galnc2 |
| 13 | FRE2    | YKL220C   | YPDcl2 | YPDcl3  | EtOHcl1 | EtOHcl2 | Galcl1 | YPDnc1 | YPDnc2 | YPDnc3 | YPDnc4  | EtOHnc1 | EtOHnc2 | Galnc1 | Galnc2 |
| 13 | YRB30   | YGL164C   | YPDcl2 | YPDcl3  | EtOHcl1 | EtOHcl2 | Galcl1 | YPDnc1 | YPDnc2 | YPDnc3 | YPDnc4  | EtOHnc1 | EtOHnc2 | Galnc1 | Galnc2 |
| 13 | ATG11   | YPR049C   | YPDcl2 | YPDcl3  | EtOHcl1 | EtOHcl2 | Galcl1 | YPDnc1 | YPDnc2 | YPDnc3 | YPDnc4  | EtOHnc1 | EtOHnc2 | Galnc1 | Galnc2 |
| 13 | SED5    | YLR026C   | YPDcl2 | YPDcl3  | EtOHcl1 | EtOHcl2 | Galcl1 | YPDnc1 | YPDnc2 | YPDnc3 | YPDnc4  | EtOHnc1 | EtOHnc2 | Galnc1 | Galnc2 |
| 13 | MGT1    | YDL200C   | YPDcl2 | YPDcl3  | EtOHcl1 | EtOHcl2 | Galcl1 | YPDnc1 | YPDnc2 | YPDnc3 | YPDnc4  | EtOHnc1 | EtOHnc2 | Galnc1 | Galnc2 |
| 13 | UIP3    | YAR027W   | YPDcl2 | YPDcl3  | EtOHcl1 | EtOHcl2 | Galcl1 | YPDnc1 | YPDnc2 | YPDnc3 | YPDnc4  | EtOHnc1 | EtOHnc2 | Galnc1 | Galnc2 |
| 13 | YAP5    | YIR018W   | YPDcl2 | YPDcl3  | EtOHcl1 | EtOHcl2 | Galcl1 | YPDnc1 | YPDnc2 | YPDnc3 | YPDnc4  | EtOHnc1 | EtOHnc2 | Galnc1 | Galnc2 |
| 13 | POR2    | YIL114C   | YPDcl2 | YPDcl3  | EtOHcl1 | EtOHcl2 | Galcl1 | YPDnc1 | YPDnc2 | YPDnc3 | YPDnc4  | EtOHnc1 | EtOHnc2 | Galnc1 | Galnc2 |
| 13 | GYP8    | YFL027C   | YPDcl2 | YPDcl3  | EtOHcl1 | EtOHcl2 | Galcl1 | YPDnc1 | YPDnc2 | YPDnc3 | YPDnc4  | EtOHnc1 | EtOHnc2 | Galnc1 | Galnc2 |
| 13 | CSR1    | YLR380W   | YPDcl2 | YPDcl3  | EtOHcl1 | EtOHcl2 | Galcl1 | YPDnc1 | YPDnc2 | YPDnc3 | YPDnc4  | EtOHnc1 | EtOHnc2 | Galnc1 | Galnc2 |
| 13 |         | YGR169C-A | YPDcl2 | YPDcl3  | EtOHcl1 | EtOHcl2 | Galcl1 | YPDnc1 | YPDnc2 | YPDnc3 | YPDnc4  | EtOHnc1 | EtOHnc2 | Galnc1 | Galnc2 |
| 13 | GIM3    | YNL153C   | YPDcl2 | YPDcl3  | EtOHcl1 | EtOHcl2 | Galcl1 | YPDnc1 | YPDnc2 | YPDnc3 | YPDnc4  | EtOHnc1 | EtOHnc2 | Galnc1 | Galnc2 |
| 13 |         | YGR079W   | YPDcl2 | YPDcl3  | EtOHcl1 | EtOHcl2 | Galcl1 | YPDnc1 | YPDnc2 | YPDnc3 | YPDnc4  | EtOHnc1 | EtOHnc2 | Galnc1 | Galnc2 |
| 13 | NIT1    | YIL164C   | YPDcl2 | YPDcl3  | EtOHcl1 | EtOHcl2 | Galcl1 | YPDnc1 | YPDnc2 | YPDnc3 | YPDnc4  | EtOHnc1 | EtOHnc2 | Galnc1 | Galnc2 |
| 13 | MRPL39  | YML009C   | YPDcl2 | YPDcl3  | EtOHcl1 | EtOHcl2 | Galcl1 | YPDnc1 | YPDnc2 | YPDnc3 | YPDnc4  | EtOHnc1 | EtOHnc2 | Galnc1 | Galnc2 |
| 13 |         | YOL073C   | YPDcl2 | YPDcl3  | EtOHcl1 | EtOHcl2 | Galcl1 | YPDnc1 | YPDnc2 | YPDnc3 | YPDnc4  | EtOHnc1 | EtOHnc2 | Galnc1 | Galnc2 |
| 13 | GAD1    | YMR250W   | YPDcl2 | YPDcl3  | EtOHcl1 | EtOHcl2 | Galcl1 | YPDnc1 | YPDnc2 | YPDnc3 | YPDnc4  | EtOHnc1 | EtOHnc2 | Galnc1 | Galnc2 |

|            |          |        |        |         |         |        |        |        |        |        |         |         |        |        |
|------------|----------|--------|--------|---------|---------|--------|--------|--------|--------|--------|---------|---------|--------|--------|
| 13         | YDR444W  | YPDcl2 | YPDcl3 | EtOHcl1 | EtOHcl2 | Galcl1 | YPDnc1 | YPDnc2 | YPDnc3 | YPDnc4 | EtOHnc1 | EtOHnc2 | Galnc1 | Galnc2 |
| 13 GIN4    | YDR507C  | YPDcl2 | YPDcl3 | EtOHcl1 | EtOHcl2 | Galcl1 | YPDnc1 | YPDnc2 | YPDnc3 | YPDnc4 | EtOHnc1 | EtOHnc2 | Galnc1 | Galnc2 |
| 13 RDS3    | YPR094W  | YPDcl2 | YPDcl3 | EtOHcl1 | EtOHcl2 | Galcl1 | YPDnc1 | YPDnc2 | YPDnc3 | YPDnc4 | EtOHnc1 | EtOHnc2 | Galnc1 | Galnc2 |
| 13 ADH2    | YMR303C  | YPDcl2 | YPDcl3 | EtOHcl1 | EtOHcl2 | Galcl1 | YPDnc1 | YPDnc2 | YPDnc3 | YPDnc4 | EtOHnc1 | EtOHnc2 | Galnc1 | Galnc2 |
| 13 PRP5    | YBR237W  | YPDcl2 | YPDcl3 | EtOHcl1 | EtOHcl2 | Galcl1 | YPDnc1 | YPDnc2 | YPDnc3 | YPDnc4 | EtOHnc1 | EtOHnc2 | Galnc1 | Galnc2 |
| 13 SPC25   | YER018C  | YPDcl2 | YPDcl3 | EtOHcl1 | EtOHcl2 | Galcl1 | YPDnc1 | YPDnc2 | YPDnc3 | YPDnc4 | EtOHnc1 | EtOHnc2 | Galnc1 | Galnc2 |
| 13 YSF3    | YNL138W- | YPDcl2 | YPDcl3 | EtOHcl1 | EtOHcl2 | Galcl1 | YPDnc1 | YPDnc2 | YPDnc3 | YPDnc4 | EtOHnc1 | EtOHnc2 | Galnc1 | Galnc2 |
| 13 RPP1B   | YDL130W  | YPDcl2 | YPDcl3 | EtOHcl1 | EtOHcl2 | Galcl1 | YPDnc1 | YPDnc2 | YPDnc3 | YPDnc4 | EtOHnc1 | EtOHnc2 | Galnc1 | Galnc2 |
| 13 YAP1801 | YHR161C  | YPDcl2 | YPDcl3 | EtOHcl1 | EtOHcl2 | Galcl1 | YPDnc1 | YPDnc2 | YPDnc3 | YPDnc4 | EtOHnc1 | EtOHnc2 | Galnc1 | Galnc2 |
| 13 MRPL1   | YDR116C  | YPDcl2 | YPDcl3 | EtOHcl1 | EtOHcl2 | Galcl1 | YPDnc1 | YPDnc2 | YPDnc3 | YPDnc4 | EtOHnc1 | EtOHnc2 | Galnc1 | Galnc2 |
| 13 AMD2    | YDR242W  | YPDcl2 | YPDcl3 | EtOHcl1 | EtOHcl2 | Galcl1 | YPDnc1 | YPDnc2 | YPDnc3 | YPDnc4 | EtOHnc1 | EtOHnc2 | Galnc1 | Galnc2 |
| 13 CTR9    | YOL145C  | YPDcl2 | YPDcl3 | EtOHcl1 | EtOHcl2 | Galcl1 | YPDnc1 | YPDnc2 | YPDnc3 | YPDnc4 | EtOHnc1 | EtOHnc2 | Galnc1 | Galnc2 |
| 13 SNF2    | YOR290C  | YPDcl2 | YPDcl3 | EtOHcl1 | EtOHcl2 | Galcl1 | YPDnc1 | YPDnc2 | YPDnc3 | YPDnc4 | EtOHnc1 | EtOHnc2 | Galnc1 | Galnc2 |
| 13 GEA1    | YJR031C  | YPDcl2 | YPDcl3 | EtOHcl1 | EtOHcl2 | Galcl1 | YPDnc1 | YPDnc2 | YPDnc3 | YPDnc4 | EtOHnc1 | EtOHnc2 | Galnc1 | Galnc2 |
| 13 PAM17   | YKR065C  | YPDcl2 | YPDcl3 | EtOHcl1 | EtOHcl2 | Galcl1 | YPDnc1 | YPDnc2 | YPDnc3 | YPDnc4 | EtOHnc1 | EtOHnc2 | Galnc1 | Galnc2 |
| 13         | YBR139W  | YPDcl2 | YPDcl3 | EtOHcl1 | EtOHcl2 | Galcl1 | YPDnc1 | YPDnc2 | YPDnc3 | YPDnc4 | EtOHnc1 | EtOHnc2 | Galnc1 | Galnc2 |
| 13 ATG21   | YPL100W  | YPDcl2 | YPDcl3 | EtOHcl1 | EtOHcl2 | Galcl1 | YPDnc1 | YPDnc2 | YPDnc3 | YPDnc4 | EtOHnc1 | EtOHnc2 | Galnc1 | Galnc2 |
| 13 NOP53   | YPL146C  | YPDcl2 | YPDcl3 | EtOHcl1 | EtOHcl2 | Galcl1 | YPDnc1 | YPDnc2 | YPDnc3 | YPDnc4 | EtOHnc1 | EtOHnc2 | Galnc1 | Galnc2 |
| 13 KAR4    | YCL055W  | YPDcl2 | YPDcl3 | EtOHcl1 | EtOHcl2 | Galcl1 | YPDnc1 | YPDnc2 | YPDnc3 | YPDnc4 | EtOHnc1 | EtOHnc2 | Galnc1 | Galnc2 |
| 13 RPS17A  | YML024W  | YPDcl2 | YPDcl3 | EtOHcl1 | EtOHcl2 | Galcl1 | YPDnc1 | YPDnc2 | YPDnc3 | YPDnc4 | EtOHnc1 | EtOHnc2 | Galnc1 | Galnc2 |
| 13 MRPL22  | YNL177C  | YPDcl2 | YPDcl3 | EtOHcl1 | EtOHcl2 | Galcl1 | YPDnc1 | YPDnc2 | YPDnc3 | YPDnc4 | EtOHnc1 | EtOHnc2 | Galnc1 | Galnc2 |
| 13 BCH2    | YKR027W  | YPDcl2 | YPDcl3 | EtOHcl1 | EtOHcl2 | Galcl1 | YPDnc1 | YPDnc2 | YPDnc3 | YPDnc4 | EtOHnc1 | EtOHnc2 | Galnc1 | Galnc2 |
| 13         | YBR138C  | YPDcl2 | YPDcl3 | EtOHcl1 | EtOHcl2 | Galcl1 | YPDnc1 | YPDnc2 | YPDnc3 | YPDnc4 | EtOHnc1 | EtOHnc2 | Galnc1 | Galnc2 |
| 13         | YJL055W  | YPDcl2 | YPDcl3 | EtOHcl1 | EtOHcl2 | Galcl1 | YPDnc1 | YPDnc2 | YPDnc3 | YPDnc4 | EtOHnc1 | EtOHnc2 | Galnc1 | Galnc2 |
| 13 RPS21B  | YJL136C  | YPDcl2 | YPDcl3 | EtOHcl1 | EtOHcl2 | Galcl1 | YPDnc1 | YPDnc2 | YPDnc3 | YPDnc4 | EtOHnc1 | EtOHnc2 | Galnc1 | Galnc2 |
| 13 MLH2    | YLR035C  | YPDcl2 | YPDcl3 | EtOHcl1 | EtOHcl2 | Galcl1 | YPDnc1 | YPDnc2 | YPDnc3 | YPDnc4 | EtOHnc1 | EtOHnc2 | Galnc1 | Galnc2 |
| 13         | YBR016W  | YPDcl2 | YPDcl3 | EtOHcl1 | EtOHcl2 | Galcl1 | YPDnc1 | YPDnc2 | YPDnc3 | YPDnc4 | EtOHnc1 | EtOHnc2 | Galnc1 | Galnc2 |
| 13         | YFL054C  | YPDcl2 | YPDcl3 | EtOHcl1 | EtOHcl2 | Galcl1 | YPDnc1 | YPDnc2 | YPDnc3 | YPDnc4 | EtOHnc1 | EtOHnc2 | Galnc1 | Galnc2 |
| 13 RPC37   | YKR025W  | YPDcl2 | YPDcl3 | EtOHcl1 | EtOHcl2 | Galcl1 | YPDnc1 | YPDnc2 | YPDnc3 | YPDnc4 | EtOHnc1 | EtOHnc2 | Galnc1 | Galnc2 |
| 13 CHS7    | YHR142W  | YPDcl2 | YPDcl3 | EtOHcl1 | EtOHcl2 | Galcl1 | YPDnc1 | YPDnc2 | YPDnc3 | YPDnc4 | EtOHnc1 | EtOHnc2 | Galnc1 | Galnc2 |
| 13 ENT4    | YLL038C  | YPDcl2 | YPDcl3 | EtOHcl1 | EtOHcl2 | Galcl1 | YPDnc1 | YPDnc2 | YPDnc3 | YPDnc4 | EtOHnc1 | EtOHnc2 | Galnc1 | Galnc2 |
| 13         | YLR146W- | YPDcl2 | YPDcl3 | EtOHcl1 | EtOHcl2 | Galcl1 | YPDnc1 | YPDnc2 | YPDnc3 | YPDnc4 | EtOHnc1 | EtOHnc2 | Galnc1 | Galnc2 |
| 13 SPT23   | YKL020C  | YPDcl2 | YPDcl3 | EtOHcl1 | EtOHcl2 | Galcl1 | YPDnc1 | YPDnc2 | YPDnc3 | YPDnc4 | EtOHnc1 | EtOHnc2 | Galnc1 | Galnc2 |
| 13 MLH3    | YPL164C  | YPDcl2 | YPDcl3 | EtOHcl1 | EtOHcl2 | Galcl1 | YPDnc1 | YPDnc2 | YPDnc3 | YPDnc4 | EtOHnc1 | EtOHnc2 | Galnc1 | Galnc2 |

|           |           |        |        |         |         |        |        |        |        |        |         |         |        |        |
|-----------|-----------|--------|--------|---------|---------|--------|--------|--------|--------|--------|---------|---------|--------|--------|
| 13 PUP3   | YER094C   | YPDcl2 | YPDcl3 | EtOHcl1 | EtOHcl2 | Galcl1 | YPDnc1 | YPDnc2 | YPDnc3 | YPDnc4 | EtOHnc1 | EtOHnc2 | Galnc1 | Galnc2 |
| 13 RSM26  | YJR101W   | YPDcl2 | YPDcl3 | EtOHcl1 | EtOHcl2 | Galcl1 | YPDnc1 | YPDnc2 | YPDnc3 | YPDnc4 | EtOHnc1 | EtOHnc2 | Galnc1 | Galnc2 |
| 13 NEJ1   | YLR265C   | YPDcl2 | YPDcl3 | EtOHcl1 | EtOHcl2 | Galcl1 | YPDnc1 | YPDnc2 | YPDnc3 | YPDnc4 | EtOHnc1 | EtOHnc2 | Galnc1 | Galnc2 |
| 13 RPS17B | YDR447C   | YPDcl2 | YPDcl3 | EtOHcl1 | EtOHcl2 | Galcl1 | YPDnc1 | YPDnc2 | YPDnc3 | YPDnc4 | EtOHnc1 | EtOHnc2 | Galnc1 | Galnc2 |
| 13 OM45   | YIL136W   | YPDcl2 | YPDcl3 | EtOHcl1 | EtOHcl2 | Galcl1 | YPDnc1 | YPDnc2 | YPDnc3 | YPDnc4 | EtOHnc1 | EtOHnc2 | Galnc1 | Galnc2 |
| 13        | YOR052C   | YPDcl2 | YPDcl3 | EtOHcl1 | EtOHcl2 | Galcl1 | YPDnc1 | YPDnc2 | YPDnc3 | YPDnc4 | EtOHnc1 | EtOHnc2 | Galnc1 | Galnc2 |
| 13 RIB4   | YOL143C   | YPDcl2 | YPDcl3 | EtOHcl1 | EtOHcl2 | Galcl1 | YPDnc1 | YPDnc2 | YPDnc3 | YPDnc4 | EtOHnc1 | EtOHnc2 | Galnc1 | Galnc2 |
| 13        | YPL278C   | YPDcl2 | YPDcl3 | EtOHcl1 | EtOHcl2 | Galcl1 | YPDnc1 | YPDnc2 | YPDnc3 | YPDnc4 | EtOHnc1 | EtOHnc2 | Galnc1 | Galnc2 |
| 13 BUD21  | YOR078W   | YPDcl2 | YPDcl3 | EtOHcl1 | EtOHcl2 | Galcl1 | YPDnc1 | YPDnc2 | YPDnc3 | YPDnc4 | EtOHnc1 | EtOHnc2 | Galnc1 | Galnc2 |
| 13 DDR2   | YOL052C-A | YPDcl2 | YPDcl3 | EtOHcl1 | EtOHcl2 | Galcl1 | YPDnc1 | YPDnc2 | YPDnc3 | YPDnc4 | EtOHnc1 | EtOHnc2 | Galnc1 | Galnc2 |
| 13 YME2   | YMR302C   | YPDcl2 | YPDcl3 | EtOHcl1 | EtOHcl2 | Galcl1 | YPDnc1 | YPDnc2 | YPDnc3 | YPDnc4 | EtOHnc1 | EtOHnc2 | Galnc1 | Galnc2 |
| 13 TIP41  | YPR040W   | YPDcl2 | YPDcl3 | EtOHcl1 | EtOHcl2 | Galcl1 | YPDnc1 | YPDnc2 | YPDnc3 | YPDnc4 | EtOHnc1 | EtOHnc2 | Galnc1 | Galnc2 |
| 13 CWC23  | YGL128C   | YPDcl2 | YPDcl3 | EtOHcl1 | EtOHcl2 | Galcl1 | YPDnc1 | YPDnc2 | YPDnc3 | YPDnc4 | EtOHnc1 | EtOHnc2 | Galnc1 | Galnc2 |
| 13 MSH3   | YCR092C   | YPDcl2 | YPDcl3 | EtOHcl1 | EtOHcl2 | Galcl1 | YPDnc1 | YPDnc2 | YPDnc3 | YPDnc4 | EtOHnc1 | EtOHnc2 | Galnc1 | Galnc2 |
| 13 STB6   | YKL072W   | YPDcl2 | YPDcl3 | EtOHcl1 | EtOHcl2 | Galcl1 | YPDnc1 | YPDnc2 | YPDnc3 | YPDnc4 | EtOHnc1 | EtOHnc2 | Galnc1 | Galnc2 |
| 13 THI74  | YDR438W   | YPDcl2 | YPDcl3 | EtOHcl1 | EtOHcl2 | Galcl1 | YPDnc1 | YPDnc2 | YPDnc3 | YPDnc4 | EtOHnc1 | EtOHnc2 | Galnc1 | Galnc2 |
| 13 MGR2   | YPL098C   | YPDcl2 | YPDcl3 | EtOHcl1 | EtOHcl2 | Galcl1 | YPDnc1 | YPDnc2 | YPDnc3 | YPDnc4 | EtOHnc1 | EtOHnc2 | Galnc1 | Galnc2 |
| 13 MVP1   | YMR004W   | YPDcl2 | YPDcl3 | EtOHcl1 | EtOHcl2 | Galcl1 | YPDnc1 | YPDnc2 | YPDnc3 | YPDnc4 | EtOHnc1 | EtOHnc2 | Galnc1 | Galnc2 |
| 13 HOG1   | YLR113W   | YPDcl2 | YPDcl3 | EtOHcl1 | EtOHcl2 | Galcl1 | YPDnc1 | YPDnc2 | YPDnc3 | YPDnc4 | EtOHnc1 | EtOHnc2 | Galnc1 | Galnc2 |
| 13 COA1   | YIL157C   | YPDcl2 | YPDcl3 | EtOHcl1 | EtOHcl2 | Galcl1 | YPDnc1 | YPDnc2 | YPDnc3 | YPDnc4 | EtOHnc1 | EtOHnc2 | Galnc1 | Galnc2 |
| 13        | YBR141W-  | YPDcl2 | YPDcl3 | EtOHcl1 | EtOHcl2 | Galcl1 | YPDnc1 | YPDnc2 | YPDnc3 | YPDnc4 | EtOHnc1 | EtOHnc2 | Galnc1 | Galnc2 |
| 13 SUE1   | YPR151C   | YPDcl2 | YPDcl3 | EtOHcl1 | EtOHcl2 | Galcl1 | YPDnc1 | YPDnc2 | YPDnc3 | YPDnc4 | EtOHnc1 | EtOHnc2 | Galnc1 | Galnc2 |
| 13 TOP1   | YOL006C   | YPDcl2 | YPDcl3 | EtOHcl1 | EtOHcl2 | Galcl1 | YPDnc1 | YPDnc2 | YPDnc3 | YPDnc4 | EtOHnc1 | EtOHnc2 | Galnc1 | Galnc2 |
| 13 DOG1   | YHR044C   | YPDcl2 | YPDcl3 | EtOHcl1 | EtOHcl2 | Galcl1 | YPDnc1 | YPDnc2 | YPDnc3 | YPDnc4 | EtOHnc1 | EtOHnc2 | Galnc1 | Galnc2 |
| 13 EPL1   | YFL024C   | YPDcl2 | YPDcl3 | EtOHcl1 | EtOHcl2 | Galcl1 | YPDnc1 | YPDnc2 | YPDnc3 | YPDnc4 | EtOHnc1 | EtOHnc2 | Galnc1 | Galnc2 |
| 13 SCC2   | YDR180W   | YPDcl2 | YPDcl3 | EtOHcl1 | EtOHcl2 | Galcl1 | YPDnc1 | YPDnc2 | YPDnc3 | YPDnc4 | EtOHnc1 | EtOHnc2 | Galnc1 | Galnc2 |
| 13 KAP120 | YPL125W   | YPDcl2 | YPDcl3 | EtOHcl1 | EtOHcl2 | Galcl1 | YPDnc1 | YPDnc2 | YPDnc3 | YPDnc4 | EtOHnc1 | EtOHnc2 | Galnc1 | Galnc2 |
| 13        | YBL077W   | YPDcl2 | YPDcl3 | EtOHcl1 | EtOHcl2 | Galcl1 | YPDnc1 | YPDnc2 | YPDnc3 | YPDnc4 | EtOHnc1 | EtOHnc2 | Galnc1 | Galnc2 |
| 13 RFX1   | YLR176C   | YPDcl2 | YPDcl3 | EtOHcl1 | EtOHcl2 | Galcl1 | YPDnc1 | YPDnc2 | YPDnc3 | YPDnc4 | EtOHnc1 | EtOHnc2 | Galnc1 | Galnc2 |
| 13 JEM1   | YJL073W   | YPDcl2 | YPDcl3 | EtOHcl1 | EtOHcl2 | Galcl1 | YPDnc1 | YPDnc2 | YPDnc3 | YPDnc4 | EtOHnc1 | EtOHnc2 | Galnc1 | Galnc2 |
| 13 TEN1   | YLR010C   | YPDcl2 | YPDcl3 | EtOHcl1 | EtOHcl2 | Galcl1 | YPDnc1 | YPDnc2 | YPDnc3 | YPDnc4 | EtOHnc1 | EtOHnc2 | Galnc1 | Galnc2 |
| 13 GID8   | YMR135C   | YPDcl2 | YPDcl3 | EtOHcl1 | EtOHcl2 | Galcl1 | YPDnc1 | YPDnc2 | YPDnc3 | YPDnc4 | EtOHnc1 | EtOHnc2 | Galnc1 | Galnc2 |
| 13 EMI5   | YOL071W   | YPDcl2 | YPDcl3 | EtOHcl1 | EtOHcl2 | Galcl1 | YPDnc1 | YPDnc2 | YPDnc3 | YPDnc4 | EtOHnc1 | EtOHnc2 | Galnc1 | Galnc2 |
| 13 FUS2   | YMR232W   | YPDcl2 | YPDcl3 | EtOHcl1 | EtOHcl2 | Galcl1 | YPDnc1 | YPDnc2 | YPDnc3 | YPDnc4 | EtOHnc1 | EtOHnc2 | Galnc1 | Galnc2 |



|    |       |           |        |        |         |         |        |        |        |        |        |         |         |        |        |
|----|-------|-----------|--------|--------|---------|---------|--------|--------|--------|--------|--------|---------|---------|--------|--------|
| 13 | SCS3  | YGL126W   | YPDcl2 | YPDcl3 | EtOHcl1 | EtOHcl2 | Galcl1 | YPDnc1 | YPDnc2 | YPDnc3 | YPDnc4 | EtOHnc1 | EtOHnc2 | Galnc1 | Galnc2 |
| 13 | TRX3  | YCR083W   | YPDcl2 | YPDcl3 | EtOHcl1 | EtOHcl2 | Galcl1 | YPDnc1 | YPDnc2 | YPDnc3 | YPDnc4 | EtOHnc1 | EtOHnc2 | Galnc1 | Galnc2 |
| 13 | SLD3  | YGL113W   | YPDcl2 | YPDcl3 | EtOHcl1 | EtOHcl2 | Galcl1 | YPDnc1 | YPDnc2 | YPDnc3 | YPDnc4 | EtOHnc1 | EtOHnc2 | Galnc1 | Galnc2 |
| 13 | FLO8  | YER109C   | YPDcl2 | YPDcl3 | EtOHcl1 | EtOHcl2 | Galcl1 | YPDnc1 | YPDnc2 | YPDnc3 | YPDnc4 | EtOHnc1 | EtOHnc2 | Galnc1 | Galnc2 |
| 13 |       | YBR200W-  | YPDcl2 | YPDcl3 | EtOHcl1 | EtOHcl2 | Galcl1 | YPDnc1 | YPDnc2 | YPDnc3 | YPDnc4 | EtOHnc1 | EtOHnc2 | Galnc1 | Galnc2 |
| 13 |       | YNL022C   | YPDcl2 | YPDcl3 | EtOHcl1 | EtOHcl2 | Galcl1 | YPDnc1 | YPDnc2 | YPDnc3 | YPDnc4 | EtOHnc1 | EtOHnc2 | Galnc1 | Galnc2 |
| 13 | HUB1  | YNR032C-A | YPDcl2 | YPDcl3 | EtOHcl1 | EtOHcl2 | Galcl1 | YPDnc1 | YPDnc2 | YPDnc3 | YPDnc4 | EtOHnc1 | EtOHnc2 | Galnc1 | Galnc2 |
| 13 | TMA16 | YOR252W   | YPDcl2 | YPDcl3 | EtOHcl1 | EtOHcl2 | Galcl1 | YPDnc1 | YPDnc2 | YPDnc3 | YPDnc4 | EtOHnc1 | EtOHnc2 | Galnc1 | Galnc2 |
| 13 | SPC42 | YKL042W   | YPDcl2 | YPDcl3 | EtOHcl1 | EtOHcl2 | Galcl1 | YPDnc1 | YPDnc2 | YPDnc3 | YPDnc4 | EtOHnc1 | EtOHnc2 | Galnc1 | Galnc2 |
| 13 | FMP48 | YGR052W   | YPDcl2 | YPDcl3 | EtOHcl1 | EtOHcl2 | Galcl1 | YPDnc1 | YPDnc2 | YPDnc3 | YPDnc4 | EtOHnc1 | EtOHnc2 | Galnc1 | Galnc2 |
| 13 |       | YDL196W   | YPDcl2 | YPDcl3 | EtOHcl1 | EtOHcl2 | Galcl1 | YPDnc1 | YPDnc2 | YPDnc3 | YPDnc4 | EtOHnc1 | EtOHnc2 | Galnc1 | Galnc2 |
| 13 | ORC2  | YBR060C   | YPDcl2 | YPDcl3 | EtOHcl1 | EtOHcl2 | Galcl1 | YPDnc1 | YPDnc2 | YPDnc3 | YPDnc4 | EtOHnc1 | EtOHnc2 | Galnc1 | Galnc2 |
| 13 | COX15 | YER141W   | YPDcl2 | YPDcl3 | EtOHcl1 | EtOHcl2 | Galcl1 | YPDnc1 | YPDnc2 | YPDnc3 | YPDnc4 | EtOHnc1 | EtOHnc2 | Galnc1 | Galnc2 |
| 13 |       | YPR172W   | YPDcl2 | YPDcl3 | EtOHcl1 | EtOHcl2 | Galcl1 | YPDnc1 | YPDnc2 | YPDnc3 | YPDnc4 | EtOHnc1 | EtOHnc2 | Galnc1 | Galnc2 |
| 13 | LSM1  | YJL124C   | YPDcl2 | YPDcl3 | EtOHcl1 | EtOHcl2 | Galcl1 | YPDnc1 | YPDnc2 | YPDnc3 | YPDnc4 | EtOHnc1 | EtOHnc2 | Galnc1 | Galnc2 |
| 13 | NBP35 | YGL091C   | YPDcl2 | YPDcl3 | EtOHcl1 | EtOHcl2 | Galcl1 | YPDnc1 | YPDnc2 | YPDnc3 | YPDnc4 | EtOHnc1 | EtOHnc2 | Galnc1 | Galnc2 |
| 13 | LSB6  | YJL100W   | YPDcl2 | YPDcl3 | EtOHcl1 | EtOHcl2 | Galcl1 | YPDnc1 | YPDnc2 | YPDnc3 | YPDnc4 | EtOHnc1 | EtOHnc2 | Galnc1 | Galnc2 |
| 13 | AAP1  | YHR047C   | YPDcl2 | YPDcl3 | EtOHcl1 | EtOHcl2 | Galcl1 | YPDnc1 | YPDnc2 | YPDnc3 | YPDnc4 | EtOHnc1 | EtOHnc2 | Galnc1 | Galnc2 |
| 13 | DAN1  | YJR150C   | YPDcl2 | YPDcl3 | EtOHcl1 | EtOHcl2 | Galcl1 | YPDnc1 | YPDnc2 | YPDnc3 | YPDnc4 | EtOHnc1 | EtOHnc2 | Galnc1 | Galnc2 |
| 13 | FUN12 | YAL035W   | YPDcl2 | YPDcl3 | EtOHcl1 | EtOHcl2 | Galcl1 | YPDnc1 | YPDnc2 | YPDnc3 | YPDnc4 | EtOHnc1 | EtOHnc2 | Galnc1 | Galnc2 |
| 13 | CMR3  | YPR013C   | YPDcl2 | YPDcl3 | EtOHcl1 | EtOHcl2 | Galcl1 | YPDnc1 | YPDnc2 | YPDnc3 | YPDnc4 | EtOHnc1 | EtOHnc2 | Galnc1 | Galnc2 |
| 13 | PBI2  | YNL015W   | YPDcl2 | YPDcl3 | EtOHcl1 | EtOHcl2 | Galcl1 | YPDnc1 | YPDnc2 | YPDnc3 | YPDnc4 | EtOHnc1 | EtOHnc2 | Galnc1 | Galnc2 |
| 13 | MRP49 | YKL167C   | YPDcl2 | YPDcl3 | EtOHcl1 | EtOHcl2 | Galcl1 | YPDnc1 | YPDnc2 | YPDnc3 | YPDnc4 | EtOHnc1 | EtOHnc2 | Galnc1 | Galnc2 |
| 13 | MOT3  | YMR070W   | YPDcl2 | YPDcl3 | EtOHcl1 | EtOHcl2 | Galcl1 | YPDnc1 | YPDnc2 | YPDnc3 | YPDnc4 | EtOHnc1 | EtOHnc2 | Galnc1 | Galnc2 |
| 13 |       | YML083C   | YPDcl2 | YPDcl3 | EtOHcl1 | EtOHcl2 | Galcl1 | YPDnc1 | YPDnc2 | YPDnc3 | YPDnc4 | EtOHnc1 | EtOHnc2 | Galnc1 | Galnc2 |
| 13 | MHR1  | YDR296W   | YPDcl2 | YPDcl3 | EtOHcl1 | EtOHcl2 | Galcl1 | YPDnc1 | YPDnc2 | YPDnc3 | YPDnc4 | EtOHnc1 | EtOHnc2 | Galnc1 | Galnc2 |
| 13 | HMX1  | YLR205C   | YPDcl2 | YPDcl3 | EtOHcl1 | EtOHcl2 | Galcl1 | YPDnc1 | YPDnc2 | YPDnc3 | YPDnc4 | EtOHnc1 | EtOHnc2 | Galnc1 | Galnc2 |
| 13 | SEC18 | YBR080C   | YPDcl2 | YPDcl3 | EtOHcl1 | EtOHcl2 | Galcl1 | YPDnc1 | YPDnc2 | YPDnc3 | YPDnc4 | EtOHnc1 | EtOHnc2 | Galnc1 | Galnc2 |
| 13 | ADI1  | YMR009W   | YPDcl2 | YPDcl3 | EtOHcl1 | EtOHcl2 | Galcl1 | YPDnc1 | YPDnc2 | YPDnc3 | YPDnc4 | EtOHnc1 | EtOHnc2 | Galnc1 | Galnc2 |
| 13 | PUS7  | YOR243C   | YPDcl2 | YPDcl3 | EtOHcl1 | EtOHcl2 | Galcl1 | YPDnc1 | YPDnc2 | YPDnc3 | YPDnc4 | EtOHnc1 | EtOHnc2 | Galnc1 | Galnc2 |
| 13 |       | YBR235W   | YPDcl2 | YPDcl3 | EtOHcl1 | EtOHcl2 | Galcl1 | YPDnc1 | YPDnc2 | YPDnc3 | YPDnc4 | EtOHnc1 | EtOHnc2 | Galnc1 | Galnc2 |
| 13 | RIO2  | YNL207W   | YPDcl2 | YPDcl3 | EtOHcl1 | EtOHcl2 | Galcl1 | YPDnc1 | YPDnc2 | YPDnc3 | YPDnc4 | EtOHnc1 | EtOHnc2 | Galnc1 | Galnc2 |
| 13 |       | YDR193W   | YPDcl2 | YPDcl3 | EtOHcl1 | EtOHcl2 | Galcl1 | YPDnc1 | YPDnc2 | YPDnc3 | YPDnc4 | EtOHnc1 | EtOHnc2 | Galnc1 | Galnc2 |
| 13 | SPB4  | YFL002C   | YPDcl2 | YPDcl3 | EtOHcl1 | EtOHcl2 | Galcl1 | YPDnc1 | YPDnc2 | YPDnc3 | YPDnc4 | EtOHnc1 | EtOHnc2 | Galnc1 | Galnc2 |

|              |               |        |        |         |         |        |        |        |        |        |         |         |        |        |
|--------------|---------------|--------|--------|---------|---------|--------|--------|--------|--------|--------|---------|---------|--------|--------|
| 13 KAP123    | YER110C       | YPDcl2 | YPDcl3 | EtOHcl1 | EtOHcl2 | Galcl1 | YPDnc1 | YPDnc2 | YPDnc3 | YPDnc4 | EtOHnc1 | EtOHnc2 | Galnc1 | Galnc2 |
| 13 ERT1      | YBR239C       | YPDcl2 | YPDcl3 | EtOHcl1 | EtOHcl2 | Galcl1 | YPDnc1 | YPDnc2 | YPDnc3 | YPDnc4 | EtOHnc1 | EtOHnc2 | Galnc1 | Galnc2 |
| 13 YND1      | YER005W       | YPDcl2 | YPDcl3 | EtOHcl1 | EtOHcl2 | Galcl1 | YPDnc1 | YPDnc2 | YPDnc3 | YPDnc4 | EtOHnc1 | EtOHnc2 | Galnc1 | Galnc2 |
| 13 ECO1      | YFR027W       | YPDcl2 | YPDcl3 | EtOHcl1 | EtOHcl2 | Galcl1 | YPDnc1 | YPDnc2 | YPDnc3 | YPDnc4 | EtOHnc1 | EtOHnc2 | Galnc1 | Galnc2 |
| 13 ISM1      | YPL040C       | YPDcl2 | YPDcl3 | EtOHcl1 | EtOHcl2 | Galcl1 | YPDnc1 | YPDnc2 | YPDnc3 | YPDnc4 | EtOHnc1 | EtOHnc2 | Galnc1 | Galnc2 |
| 13           | YJL064W       | YPDcl2 | YPDcl3 | EtOHcl1 | EtOHcl2 | Galcl1 | YPDnc1 | YPDnc2 | YPDnc3 | YPDnc4 | EtOHnc1 | EtOHnc2 | Galnc1 | Galnc2 |
| 13 TRM12     | YML005W       | YPDcl2 | YPDcl3 | EtOHcl1 | EtOHcl2 | Galcl1 | YPDnc1 | YPDnc2 | YPDnc3 | YPDnc4 | EtOHnc1 | EtOHnc2 | Galnc1 | Galnc2 |
| 13           | YGR283C       | YPDcl2 | YPDcl3 | EtOHcl1 | EtOHcl2 | Galcl1 | YPDnc1 | YPDnc2 | YPDnc3 | YPDnc4 | EtOHnc1 | EtOHnc2 | Galnc1 | Galnc2 |
| 13 SDS3      | YIL084C       | YPDcl2 | YPDcl3 | EtOHcl1 | EtOHcl2 | Galcl1 | YPDnc1 | YPDnc2 | YPDnc3 | YPDnc4 | EtOHnc1 | EtOHnc2 | Galnc1 | Galnc2 |
| 13 AVT6      | YER119C       | YPDcl2 | YPDcl3 | EtOHcl1 | EtOHcl2 | Galcl1 | YPDnc1 | YPDnc2 | YPDnc3 | YPDnc4 | EtOHnc1 | EtOHnc2 | Galnc1 | Galnc2 |
| 13 AGX1      | YFL030W       | YPDcl2 | YPDcl3 | EtOHcl1 | EtOHcl2 | Galcl1 | YPDnc1 | YPDnc2 | YPDnc3 | YPDnc4 | EtOHnc1 | EtOHnc2 | Galnc1 | Galnc2 |
| 13 MRP2      | YPR166C       | YPDcl2 | YPDcl3 | EtOHcl1 | EtOHcl2 | Galcl1 | YPDnc1 | YPDnc2 | YPDnc3 | YPDnc4 | EtOHnc1 | EtOHnc2 | Galnc1 | Galnc2 |
| 13           | YML108W       | YPDcl2 | YPDcl3 | EtOHcl1 | EtOHcl2 | Galcl1 | YPDnc1 | YPDnc2 | YPDnc3 | YPDnc4 | EtOHnc1 | EtOHnc2 | Galnc1 | Galnc2 |
| 13 TIM11     | YDR322C-A     | YPDcl2 | YPDcl3 | EtOHcl1 | EtOHcl2 | Galcl1 | YPDnc1 | YPDnc2 | YPDnc3 | YPDnc4 | EtOHnc1 | EtOHnc2 | Galnc1 | Galnc2 |
| 13 CSM2      | YIL132C       | YPDcl2 | YPDcl3 | EtOHcl1 | EtOHcl2 | Galcl1 | YPDnc1 | YPDnc2 | YPDnc3 | YPDnc4 | EtOHnc1 | EtOHnc2 | Galnc1 | Galnc2 |
| 13 PSF1      | YDR013W       | YPDcl2 | YPDcl3 | EtOHcl1 | EtOHcl2 | Galcl1 | YPDnc1 | YPDnc2 | YPDnc3 | YPDnc4 | EtOHnc1 | EtOHnc2 | Galnc1 | Galnc2 |
| 13 DAK1      | YML070W       | YPDcl2 | YPDcl3 | EtOHcl1 | EtOHcl2 | Galcl1 | YPDnc1 | YPDnc2 | YPDnc3 | YPDnc4 | EtOHnc1 | EtOHnc2 | Galnc1 | Galnc2 |
| 13 CHL1      | YPL008W       | YPDcl2 | YPDcl3 | EtOHcl1 | EtOHcl2 | Galcl1 | YPDnc1 | YPDnc2 | YPDnc3 | YPDnc4 | EtOHnc1 | EtOHnc2 | Galnc1 | Galnc2 |
| 13 CMR1      | YDL156W       | YPDcl2 | YPDcl3 | EtOHcl1 | EtOHcl2 | Galcl1 | YPDnc1 | YPDnc2 | YPDnc3 | YPDnc4 | EtOHnc1 | EtOHnc2 | Galnc1 | Galnc2 |
| 13           | YIR036W-A     | YPDcl2 | YPDcl3 | EtOHcl1 | EtOHcl2 | Galcl1 | YPDnc1 | YPDnc2 | YPDnc3 | YPDnc4 | EtOHnc1 | EtOHnc2 | Galnc1 | Galnc2 |
| 13           | 1-Oct YKL134C | YPDcl2 | YPDcl3 | EtOHcl1 | EtOHcl2 | Galcl1 | YPDnc1 | YPDnc2 | YPDnc3 | YPDnc4 | EtOHnc1 | EtOHnc2 | Galnc1 | Galnc2 |
| 13 RVB1      | YDR190C       | YPDcl2 | YPDcl3 | EtOHcl1 | EtOHcl2 | Galcl1 | YPDnc1 | YPDnc2 | YPDnc3 | YPDnc4 | EtOHnc1 | EtOHnc2 | Galnc1 | Galnc2 |
| 13           | YDR109C       | YPDcl2 | YPDcl3 | EtOHcl1 | EtOHcl2 | Galcl1 | YPDnc1 | YPDnc2 | YPDnc3 | YPDnc4 | EtOHnc1 | EtOHnc2 | Galnc1 | Galnc2 |
| 13           | YLR356W       | YPDcl2 | YPDcl3 | EtOHcl1 | EtOHcl2 | Galcl1 | YPDnc1 | YPDnc2 | YPDnc3 | YPDnc4 | EtOHnc1 | EtOHnc2 | Galnc1 | Galnc2 |
| 13 GSY1      | YFR015C       | YPDcl2 | YPDcl3 | EtOHcl1 | EtOHcl2 | Galcl1 | YPDnc1 | YPDnc2 | YPDnc3 | YPDnc4 | EtOHnc1 | EtOHnc2 | Galnc1 | Galnc2 |
| 13 ATG10     | YLL042C       | YPDcl2 | YPDcl3 | EtOHcl1 | EtOHcl2 | Galcl1 | YPDnc1 | YPDnc2 | YPDnc3 | YPDnc4 | EtOHnc1 | EtOHnc2 | Galnc1 | Galnc2 |
| 13 DIN7      | YDR263C       | YPDcl2 | YPDcl3 | EtOHcl1 | EtOHcl2 | Galcl1 | YPDnc1 | YPDnc2 | YPDnc3 | YPDnc4 | EtOHnc1 | EtOHnc2 | Galnc1 | Galnc2 |
| 13           | YOL118C       | YPDcl2 | YPDcl3 | EtOHcl1 | EtOHcl2 | Galcl1 | YPDnc1 | YPDnc2 | YPDnc3 | YPDnc4 | EtOHnc1 | EtOHnc2 | Galnc1 | Galnc2 |
| 13 TRR2      | YHR106W       | YPDcl2 | YPDcl3 | EtOHcl1 | EtOHcl2 | Galcl1 | YPDnc1 | YPDnc2 | YPDnc3 | YPDnc4 | EtOHnc1 | EtOHnc2 | Galnc1 | Galnc2 |
| 13           | YGL118C       | YPDcl2 | YPDcl3 | EtOHcl1 | EtOHcl2 | Galcl1 | YPDnc1 | YPDnc2 | YPDnc3 | YPDnc4 | EtOHnc1 | EtOHnc2 | Galnc1 | Galnc2 |
| 13 RPL38     | YLR325C       | YPDcl2 | YPDcl3 | EtOHcl1 | EtOHcl2 | Galcl1 | YPDnc1 | YPDnc2 | YPDnc3 | YPDnc4 | EtOHnc1 | EtOHnc2 | Galnc1 | Galnc2 |
| 13 MF(ALPHA) | YGL089C       | YPDcl2 | YPDcl3 | EtOHcl1 | EtOHcl2 | Galcl1 | YPDnc1 | YPDnc2 | YPDnc3 | YPDnc4 | EtOHnc1 | EtOHnc2 | Galnc1 | Galnc2 |
| 13 HFA1      | YMR207C       | YPDcl2 | YPDcl3 | EtOHcl1 | EtOHcl2 | Galcl1 | YPDnc1 | YPDnc2 | YPDnc3 | YPDnc4 | EtOHnc1 | EtOHnc2 | Galnc1 | Galnc2 |
| 13 RPA49     | YNL248C       | YPDcl2 | YPDcl3 | EtOHcl1 | EtOHcl2 | Galcl1 | YPDnc1 | YPDnc2 | YPDnc3 | YPDnc4 | EtOHnc1 | EtOHnc2 | Galnc1 | Galnc2 |

|    |        |           |        |        |         |         |        |        |        |        |        |         |         |        |        |
|----|--------|-----------|--------|--------|---------|---------|--------|--------|--------|--------|--------|---------|---------|--------|--------|
| 13 | PET123 | YOR158W   | YPDcl2 | YPDcl3 | EtOHcl1 | EtOHcl2 | Galcl1 | YPDnc1 | YPDnc2 | YPDnc3 | YPDnc4 | EtOHnc1 | EtOHnc2 | Galnc1 | Galnc2 |
| 13 | SIS1   | YNL007C   | YPDcl2 | YPDcl3 | EtOHcl1 | EtOHcl2 | Galcl1 | YPDnc1 | YPDnc2 | YPDnc3 | YPDnc4 | EtOHnc1 | EtOHnc2 | Galnc1 | Galnc2 |
| 13 | PRM6   | YML047C   | YPDcl2 | YPDcl3 | EtOHcl1 | EtOHcl2 | Galcl1 | YPDnc1 | YPDnc2 | YPDnc3 | YPDnc4 | EtOHnc1 | EtOHnc2 | Galnc1 | Galnc2 |
| 13 | CLC1   | YGR167W   | YPDcl2 | YPDcl3 | EtOHcl1 | EtOHcl2 | Galcl1 | YPDnc1 | YPDnc2 | YPDnc3 | YPDnc4 | EtOHnc1 | EtOHnc2 | Galnc1 | Galnc2 |
| 13 |        | YJL182C   | YPDcl2 | YPDcl3 | EtOHcl1 | EtOHcl2 | Galcl1 | YPDnc1 | YPDnc2 | YPDnc3 | YPDnc4 | EtOHnc1 | EtOHnc2 | Galnc1 | Galnc2 |
| 13 | GAT2   | YMR136W   | YPDcl2 | YPDcl3 | EtOHcl1 | EtOHcl2 | Galcl1 | YPDnc1 | YPDnc2 | YPDnc3 | YPDnc4 | EtOHnc1 | EtOHnc2 | Galnc1 | Galnc2 |
| 13 |        | YCR076C   | YPDcl2 | YPDcl3 | EtOHcl1 | EtOHcl2 | Galcl1 | YPDnc1 | YPDnc2 | YPDnc3 | YPDnc4 | EtOHnc1 | EtOHnc2 | Galnc1 | Galnc2 |
| 13 | COG1   | YGL223C   | YPDcl2 | YPDcl3 | EtOHcl1 | EtOHcl2 | Galcl1 | YPDnc1 | YPDnc2 | YPDnc3 | YPDnc4 | EtOHnc1 | EtOHnc2 | Galnc1 | Galnc2 |
| 13 |        | YHR131C   | YPDcl2 | YPDcl3 | EtOHcl1 | EtOHcl2 | Galcl1 | YPDnc1 | YPDnc2 | YPDnc3 | YPDnc4 | EtOHnc1 | EtOHnc2 | Galnc1 | Galnc2 |
| 13 | POT1   | YIL160C   | YPDcl2 | YPDcl3 | EtOHcl1 | EtOHcl2 | Galcl1 | YPDnc1 | YPDnc2 | YPDnc3 | YPDnc4 | EtOHnc1 | EtOHnc2 | Galnc1 | Galnc2 |
| 13 | ENA2   | YDR039C   | YPDcl2 | YPDcl3 | EtOHcl1 | EtOHcl2 | Galcl1 | YPDnc1 | YPDnc2 | YPDnc3 | YPDnc4 | EtOHnc1 | EtOHnc2 | Galnc1 | Galnc2 |
| 13 | RFT1   | YBL020W   | YPDcl2 | YPDcl3 | EtOHcl1 | EtOHcl2 | Galcl1 | YPDnc1 | YPDnc2 | YPDnc3 | YPDnc4 | EtOHnc1 | EtOHnc2 | Galnc1 | Galnc2 |
| 13 | VMA2   | YBR127C   | YPDcl2 | YPDcl3 | EtOHcl1 | EtOHcl2 | Galcl1 | YPDnc1 | YPDnc2 | YPDnc3 | YPDnc4 | EtOHnc1 | EtOHnc2 | Galnc1 | Galnc2 |
| 13 | RSM23  | YGL129C   | YPDcl2 | YPDcl3 | EtOHcl1 | EtOHcl2 | Galcl1 | YPDnc1 | YPDnc2 | YPDnc3 | YPDnc4 | EtOHnc1 | EtOHnc2 | Galnc1 | Galnc2 |
| 13 | LST4   | YKL176C   | YPDcl2 | YPDcl3 | EtOHcl1 | EtOHcl2 | Galcl1 | YPDnc1 | YPDnc2 | YPDnc3 | YPDnc4 | EtOHnc1 | EtOHnc2 | Galnc1 | Galnc2 |
| 13 |        | YER152W-A | YPDcl2 | YPDcl3 | EtOHcl1 | EtOHcl2 | Galcl1 | YPDnc1 | YPDnc2 | YPDnc3 | YPDnc4 | EtOHnc1 | EtOHnc2 | Galnc1 | Galnc2 |
| 13 | KAP104 | YBR017C   | YPDcl2 | YPDcl3 | EtOHcl1 | EtOHcl2 | Galcl1 | YPDnc1 | YPDnc2 | YPDnc3 | YPDnc4 | EtOHnc1 | EtOHnc2 | Galnc1 | Galnc2 |
| 13 | STB2   | YMR053C   | YPDcl2 | YPDcl3 | EtOHcl1 | EtOHcl2 | Galcl1 | YPDnc1 | YPDnc2 | YPDnc3 | YPDnc4 | EtOHnc1 | EtOHnc2 | Galnc1 | Galnc2 |
| 13 | SPE4   | YLR146C   | YPDcl2 | YPDcl3 | EtOHcl1 | EtOHcl2 | Galcl1 | YPDnc1 | YPDnc2 | YPDnc3 | YPDnc4 | EtOHnc1 | EtOHnc2 | Galnc1 | Galnc2 |
| 13 | MRP7   | YNL005C   | YPDcl2 | YPDcl3 | EtOHcl1 | EtOHcl2 | Galcl1 | YPDnc1 | YPDnc2 | YPDnc3 | YPDnc4 | EtOHnc1 | EtOHnc2 | Galnc1 | Galnc2 |
| 13 |        | YHL039W   | YPDcl2 | YPDcl3 | EtOHcl1 | EtOHcl2 | Galcl1 | YPDnc1 | YPDnc2 | YPDnc3 | YPDnc4 | EtOHnc1 | EtOHnc2 | Galnc1 | Galnc2 |
| 13 | CDC9   | YDL164C   | YPDcl2 | YPDcl3 | EtOHcl1 | EtOHcl2 | Galcl1 | YPDnc1 | YPDnc2 | YPDnc3 | YPDnc4 | EtOHnc1 | EtOHnc2 | Galnc1 | Galnc2 |
| 13 | SLG1   | YOR008C   | YPDcl2 | YPDcl3 | EtOHcl1 | EtOHcl2 | Galcl1 | YPDnc1 | YPDnc2 | YPDnc3 | YPDnc4 | EtOHnc1 | EtOHnc2 | Galnc1 | Galnc2 |
| 13 | SHE9   | YDR393W   | YPDcl2 | YPDcl3 | EtOHcl1 | EtOHcl2 | Galcl1 | YPDnc1 | YPDnc2 | YPDnc3 | YPDnc4 | EtOHnc1 | EtOHnc2 | Galnc1 | Galnc2 |
| 13 |        | YEL050W-A | YPDcl2 | YPDcl3 | EtOHcl1 | EtOHcl2 | Galcl1 | YPDnc1 | YPDnc2 | YPDnc3 | YPDnc4 | EtOHnc1 | EtOHnc2 | Galnc1 | Galnc2 |
| 13 | VAM10  | YOR068C   | YPDcl2 | YPDcl3 | EtOHcl1 | EtOHcl2 | Galcl1 | YPDnc1 | YPDnc2 | YPDnc3 | YPDnc4 | EtOHnc1 | EtOHnc2 | Galnc1 | Galnc2 |
| 13 | MDN1   | YLR106C   | YPDcl2 | YPDcl3 | EtOHcl1 | EtOHcl2 | Galcl1 | YPDnc1 | YPDnc2 | YPDnc3 | YPDnc4 | EtOHnc1 | EtOHnc2 | Galnc1 | Galnc2 |
| 13 |        | YEL025C   | YPDcl2 | YPDcl3 | EtOHcl1 | EtOHcl2 | Galcl1 | YPDnc1 | YPDnc2 | YPDnc3 | YPDnc4 | EtOHnc1 | EtOHnc2 | Galnc1 | Galnc2 |
| 13 | PES4   | YFR023W   | YPDcl2 | YPDcl3 | EtOHcl1 | EtOHcl2 | Galcl1 | YPDnc1 | YPDnc2 | YPDnc3 | YPDnc4 | EtOHnc1 | EtOHnc2 | Galnc1 | Galnc2 |
| 13 | GIS2   | YNL255C   | YPDcl2 | YPDcl3 | EtOHcl1 | EtOHcl2 | Galcl1 | YPDnc1 | YPDnc2 | YPDnc3 | YPDnc4 | EtOHnc1 | EtOHnc2 | Galnc1 | Galnc2 |
| 13 | MBB1   | YJL199C   | YPDcl2 | YPDcl3 | EtOHcl1 | EtOHcl2 | Galcl1 | YPDnc1 | YPDnc2 | YPDnc3 | YPDnc4 | EtOHnc1 | EtOHnc2 | Galnc1 | Galnc2 |
| 13 | MYO3   | YKL129C   | YPDcl2 | YPDcl3 | EtOHcl1 | EtOHcl2 | Galcl1 | YPDnc1 | YPDnc2 | YPDnc3 | YPDnc4 | EtOHnc1 | EtOHnc2 | Galnc1 | Galnc2 |
| 13 | RBK1   | YCR036W   | YPDcl2 | YPDcl3 | EtOHcl1 | EtOHcl2 | Galcl1 | YPDnc1 | YPDnc2 | YPDnc3 | YPDnc4 | EtOHnc1 | EtOHnc2 | Galnc1 | Galnc2 |
| 13 | ATX1   | YNL259C   | YPDcl2 | YPDcl3 | EtOHcl1 | EtOHcl2 | Galcl1 | YPDnc1 | YPDnc2 | YPDnc3 | YPDnc4 | EtOHnc1 | EtOHnc2 | Galnc1 | Galnc2 |

|          |          |        |        |         |         |        |        |        |        |        |         |         |        |        |
|----------|----------|--------|--------|---------|---------|--------|--------|--------|--------|--------|---------|---------|--------|--------|
| 13 OMA1  | YKR087C  | YPDcl2 | YPDcl3 | EtOHcl1 | EtOHcl2 | Galcl1 | YPDnc1 | YPDnc2 | YPDnc3 | YPDnc4 | EtOHnc1 | EtOHnc2 | Galnc1 | Galnc2 |
| 13 ARG3  | YJL088W  | YPDcl2 | YPDcl3 | EtOHcl1 | EtOHcl2 | Galcl1 | YPDnc1 | YPDnc2 | YPDnc3 | YPDnc4 | EtOHnc1 | EtOHnc2 | Galnc1 | Galnc2 |
| 13       | YCR087W  | YPDcl2 | YPDcl3 | EtOHcl1 | EtOHcl2 | Galcl1 | YPDnc1 | YPDnc2 | YPDnc3 | YPDnc4 | EtOHnc1 | EtOHnc2 | Galnc1 | Galnc2 |
| 13       | YDL114W- | YPDcl2 | YPDcl3 | EtOHcl1 | EtOHcl2 | Galcl1 | YPDnc1 | YPDnc2 | YPDnc3 | YPDnc4 | EtOHnc1 | EtOHnc2 | Galnc1 | Galnc2 |
| 13 DAT1  | YML113W  | YPDcl2 | YPDcl3 | EtOHcl1 | EtOHcl2 | Galcl1 | YPDnc1 | YPDnc2 | YPDnc3 | YPDnc4 | EtOHnc1 | EtOHnc2 | Galnc1 | Galnc2 |
| 13 RNQ1  | YCL028W  | YPDcl2 | YPDcl3 | EtOHcl1 | EtOHcl2 | Galcl1 | YPDnc1 | YPDnc2 | YPDnc3 | YPDnc4 | EtOHnc1 | EtOHnc2 | Galnc1 | Galnc2 |
| 13 CIR2  | YOR356W  | YPDcl2 | YPDcl3 | EtOHcl1 | EtOHcl2 | Galcl1 | YPDnc1 | YPDnc2 | YPDnc3 | YPDnc4 | EtOHnc1 | EtOHnc2 | Galnc1 | Galnc2 |
| 13 CBF5  | YLR175W  | YPDcl2 | YPDcl3 | EtOHcl1 | EtOHcl2 | Galcl1 | YPDnc1 | YPDnc2 | YPDnc3 | YPDnc4 | EtOHnc1 | EtOHnc2 | Galnc1 | Galnc2 |
| 13 RAD14 | YMR201C  | YPDcl2 | YPDcl3 | EtOHcl1 | EtOHcl2 | Galcl1 | YPDnc1 | YPDnc2 | YPDnc3 | YPDnc4 | EtOHnc1 | EtOHnc2 | Galnc1 | Galnc2 |
| 13 MET4  | YNL103W  | YPDcl2 | YPDcl3 | EtOHcl1 | EtOHcl2 | Galcl1 | YPDnc1 | YPDnc2 | YPDnc3 | YPDnc4 | EtOHnc1 | EtOHnc2 | Galnc1 | Galnc2 |
| 13       | YNL285W  | YPDcl2 | YPDcl3 | EtOHcl1 | EtOHcl2 | Galcl1 | YPDnc1 | YPDnc2 | YPDnc3 | YPDnc4 | EtOHnc1 | EtOHnc2 | Galnc1 | Galnc2 |
| 13 SRO9  | YCL037C  | YPDcl2 | YPDcl3 | EtOHcl1 | EtOHcl2 | Galcl1 | YPDnc1 | YPDnc2 | YPDnc3 | YPDnc4 | EtOHnc1 | EtOHnc2 | Galnc1 | Galnc2 |
| 13 HOS3  | YPL116W  | YPDcl2 | YPDcl3 | EtOHcl1 | EtOHcl2 | Galcl1 | YPDnc1 | YPDnc2 | YPDnc3 | YPDnc4 | EtOHnc1 | EtOHnc2 | Galnc1 | Galnc2 |
| 13 ROT2  | YBR229C  | YPDcl2 | YPDcl3 | EtOHcl1 | EtOHcl2 | Galcl1 | YPDnc1 | YPDnc2 | YPDnc3 | YPDnc4 | EtOHnc1 | EtOHnc2 | Galnc1 | Galnc2 |
| 13 ISW2  | YOR304W  | YPDcl2 | YPDcl3 | EtOHcl1 | EtOHcl2 | Galcl1 | YPDnc1 | YPDnc2 | YPDnc3 | YPDnc4 | EtOHnc1 | EtOHnc2 | Galnc1 | Galnc2 |
| 13 TOM71 | YHR117W  | YPDcl2 | YPDcl3 | EtOHcl1 | EtOHcl2 | Galcl1 | YPDnc1 | YPDnc2 | YPDnc3 | YPDnc4 | EtOHnc1 | EtOHnc2 | Galnc1 | Galnc2 |
| 13       | YOR366W  | YPDcl2 | YPDcl3 | EtOHcl1 | EtOHcl2 | Galcl1 | YPDnc1 | YPDnc2 | YPDnc3 | YPDnc4 | EtOHnc1 | EtOHnc2 | Galnc1 | Galnc2 |
| 13 DSD1  | YGL196W  | YPDcl2 | YPDcl3 | EtOHcl1 | EtOHcl2 | Galcl1 | YPDnc1 | YPDnc2 | YPDnc3 | YPDnc4 | EtOHnc1 | EtOHnc2 | Galnc1 | Galnc2 |
| 13 MIG1  | YGL035C  | YPDcl2 | YPDcl3 | EtOHcl1 | EtOHcl2 | Galcl1 | YPDnc1 | YPDnc2 | YPDnc3 | YPDnc4 | EtOHnc1 | EtOHnc2 | Galnc1 | Galnc2 |
| 13 LEO1  | YOR123C  | YPDcl2 | YPDcl3 | EtOHcl1 | EtOHcl2 | Galcl1 | YPDnc1 | YPDnc2 | YPDnc3 | YPDnc4 | EtOHnc1 | EtOHnc2 | Galnc1 | Galnc2 |
| 13 TAH18 | YPR048W  | YPDcl2 | YPDcl3 | EtOHcl1 | EtOHcl2 | Galcl1 | YPDnc1 | YPDnc2 | YPDnc3 | YPDnc4 | EtOHnc1 | EtOHnc2 | Galnc1 | Galnc2 |
| 13       | YPL109C  | YPDcl2 | YPDcl3 | EtOHcl1 | EtOHcl2 | Galcl1 | YPDnc1 | YPDnc2 | YPDnc3 | YPDnc4 | EtOHnc1 | EtOHnc2 | Galnc1 | Galnc2 |
| 13 SPP1  | YPL138C  | YPDcl2 | YPDcl3 | EtOHcl1 | EtOHcl2 | Galcl1 | YPDnc1 | YPDnc2 | YPDnc3 | YPDnc4 | EtOHnc1 | EtOHnc2 | Galnc1 | Galnc2 |
| 13 SBA1  | YKL117W  | YPDcl2 | YPDcl3 | EtOHcl1 | EtOHcl2 | Galcl1 | YPDnc1 | YPDnc2 | YPDnc3 | YPDnc4 | EtOHnc1 | EtOHnc2 | Galnc1 | Galnc2 |
| 13 TRM13 | YOL125W  | YPDcl2 | YPDcl3 | EtOHcl1 | EtOHcl2 | Galcl1 | YPDnc1 | YPDnc2 | YPDnc3 | YPDnc4 | EtOHnc1 | EtOHnc2 | Galnc1 | Galnc2 |
| 13 CUP5  | YEL027W  | YPDcl2 | YPDcl3 | EtOHcl1 | EtOHcl2 | Galcl1 | YPDnc1 | YPDnc2 | YPDnc3 | YPDnc4 | EtOHnc1 | EtOHnc2 | Galnc1 | Galnc2 |
| 13 HAL5  | YJL165C  | YPDcl2 | YPDcl3 | EtOHcl1 | EtOHcl2 | Galcl1 | YPDnc1 | YPDnc2 | YPDnc3 | YPDnc4 | EtOHnc1 | EtOHnc2 | Galnc1 | Galnc2 |
| 13       | YOR300W  | YPDcl2 | YPDcl3 | EtOHcl1 | EtOHcl2 | Galcl1 | YPDnc1 | YPDnc2 | YPDnc3 | YPDnc4 | EtOHnc1 | EtOHnc2 | Galnc1 | Galnc2 |
| 13 MIG2  | YGL209W  | YPDcl2 | YPDcl3 | EtOHcl1 | EtOHcl2 | Galcl1 | YPDnc1 | YPDnc2 | YPDnc3 | YPDnc4 | EtOHnc1 | EtOHnc2 | Galnc1 | Galnc2 |
| 13 RPL32 | YBL092W  | YPDcl2 | YPDcl3 | EtOHcl1 | EtOHcl2 | Galcl1 | YPDnc1 | YPDnc2 | YPDnc3 | YPDnc4 | EtOHnc1 | EtOHnc2 | Galnc1 | Galnc2 |
| 13 ADH5  | YBR145W  | YPDcl2 | YPDcl3 | EtOHcl1 | EtOHcl2 | Galcl1 | YPDnc1 | YPDnc2 | YPDnc3 | YPDnc4 | EtOHnc1 | EtOHnc2 | Galnc1 | Galnc2 |
| 13 BUD6  | YLR319C  | YPDcl2 | YPDcl3 | EtOHcl1 | EtOHcl2 | Galcl1 | YPDnc1 | YPDnc2 | YPDnc3 | YPDnc4 | EtOHnc1 | EtOHnc2 | Galnc1 | Galnc2 |
| 13 PBP2  | YBR233W  | YPDcl2 | YPDcl3 | EtOHcl1 | EtOHcl2 | Galcl1 | YPDnc1 | YPDnc2 | YPDnc3 | YPDnc4 | EtOHnc1 | EtOHnc2 | Galnc1 | Galnc2 |
| 13 RPC11 | YDR045C  | YPDcl2 | YPDcl3 | EtOHcl1 | EtOHcl2 | Galcl1 | YPDnc1 | YPDnc2 | YPDnc3 | YPDnc4 | EtOHnc1 | EtOHnc2 | Galnc1 | Galnc2 |

|    |        |           |        |        |         |         |        |        |        |        |        |         |         |        |        |
|----|--------|-----------|--------|--------|---------|---------|--------|--------|--------|--------|--------|---------|---------|--------|--------|
| 13 | ERP5   | YHR110W   | YPDcl2 | YPDcl3 | EtOHcl1 | EtOHcl2 | Galcl1 | YPDnc1 | YPDnc2 | YPDnc3 | YPDnc4 | EtOHnc1 | EtOHnc2 | Galnc1 | Galnc2 |
| 13 | MET14  | YKL001C   | YPDcl2 | YPDcl3 | EtOHcl1 | EtOHcl2 | Galcl1 | YPDnc1 | YPDnc2 | YPDnc3 | YPDnc4 | EtOHnc1 | EtOHnc2 | Galnc1 | Galnc2 |
| 13 | CHC1   | YGL206C   | YPDcl2 | YPDcl3 | EtOHcl1 | EtOHcl2 | Galcl1 | YPDnc1 | YPDnc2 | YPDnc3 | YPDnc4 | EtOHnc1 | EtOHnc2 | Galnc1 | Galnc2 |
| 13 | GPX2   | YBR244W   | YPDcl2 | YPDcl3 | EtOHcl1 | EtOHcl2 | Galcl1 | YPDnc1 | YPDnc2 | YPDnc3 | YPDnc4 | EtOHnc1 | EtOHnc2 | Galnc1 | Galnc2 |
| 13 | STE2   | YFL026W   | YPDcl2 | YPDcl3 | EtOHcl1 | EtOHcl2 | Galcl1 | YPDnc1 | YPDnc2 | YPDnc3 | YPDnc4 | EtOHnc1 | EtOHnc2 | Galnc1 | Galnc2 |
| 13 |        | YLR236C   | YPDcl2 | YPDcl3 | EtOHcl1 | EtOHcl2 | Galcl1 | YPDnc1 | YPDnc2 | YPDnc3 | YPDnc4 | EtOHnc1 | EtOHnc2 | Galnc1 | Galnc2 |
| 13 | BNI5   | YNL166C   | YPDcl2 | YPDcl3 | EtOHcl1 | EtOHcl2 | Galcl1 | YPDnc1 | YPDnc2 | YPDnc3 | YPDnc4 | EtOHnc1 | EtOHnc2 | Galnc1 | Galnc2 |
| 13 | INP2   | YMR163C   | YPDcl2 | YPDcl3 | EtOHcl1 | EtOHcl2 | Galcl1 | YPDnc1 | YPDnc2 | YPDnc3 | YPDnc4 | EtOHnc1 | EtOHnc2 | Galnc1 | Galnc2 |
| 13 | PDR1   | YGL013C   | YPDcl2 | YPDcl3 | EtOHcl1 | EtOHcl2 | Galcl1 | YPDnc1 | YPDnc2 | YPDnc3 | YPDnc4 | EtOHnc1 | EtOHnc2 | Galnc1 | Galnc2 |
| 13 | PIH1   | YHR034C   | YPDcl2 | YPDcl3 | EtOHcl1 | EtOHcl2 | Galcl1 | YPDnc1 | YPDnc2 | YPDnc3 | YPDnc4 | EtOHnc1 | EtOHnc2 | Galnc1 | Galnc2 |
| 13 |        | YOR008C-A | YPDcl2 | YPDcl3 | EtOHcl1 | EtOHcl2 | Galcl1 | YPDnc1 | YPDnc2 | YPDnc3 | YPDnc4 | EtOHnc1 | EtOHnc2 | Galnc1 | Galnc2 |
| 13 |        | YFL041W-A | YPDcl2 | YPDcl3 | EtOHcl1 | EtOHcl2 | Galcl1 | YPDnc1 | YPDnc2 | YPDnc3 | YPDnc4 | EtOHnc1 | EtOHnc2 | Galnc1 | Galnc2 |
| 13 | GIS4   | YML006C   | YPDcl2 | YPDcl3 | EtOHcl1 | EtOHcl2 | Galcl1 | YPDnc1 | YPDnc2 | YPDnc3 | YPDnc4 | EtOHnc1 | EtOHnc2 | Galnc1 | Galnc2 |
| 13 | BNS1   | YGR230W   | YPDcl2 | YPDcl3 | EtOHcl1 | EtOHcl2 | Galcl1 | YPDnc1 | YPDnc2 | YPDnc3 | YPDnc4 | EtOHnc1 | EtOHnc2 | Galnc1 | Galnc2 |
| 13 |        | YIL066W-A | YPDcl2 | YPDcl3 | EtOHcl1 | EtOHcl2 | Galcl1 | YPDnc1 | YPDnc2 | YPDnc3 | YPDnc4 | EtOHnc1 | EtOHnc2 | Galnc1 | Galnc2 |
| 13 |        | YKR017C   | YPDcl2 | YPDcl3 | EtOHcl1 | EtOHcl2 | Galcl1 | YPDnc1 | YPDnc2 | YPDnc3 | YPDnc4 | EtOHnc1 | EtOHnc2 | Galnc1 | Galnc2 |
| 13 | TAF2   | YCR042C   | YPDcl2 | YPDcl3 | EtOHcl1 | EtOHcl2 | Galcl1 | YPDnc1 | YPDnc2 | YPDnc3 | YPDnc4 | EtOHnc1 | EtOHnc2 | Galnc1 | Galnc2 |
| 13 | EAF6   | YJR082C   | YPDcl2 | YPDcl3 | EtOHcl1 | EtOHcl2 | Galcl1 | YPDnc1 | YPDnc2 | YPDnc3 | YPDnc4 | EtOHnc1 | EtOHnc2 | Galnc1 | Galnc2 |
| 13 | LEE1   | YPL054W   | YPDcl2 | YPDcl3 | EtOHcl1 | EtOHcl2 | Galcl1 | YPDnc1 | YPDnc2 | YPDnc3 | YPDnc4 | EtOHnc1 | EtOHnc2 | Galnc1 | Galnc2 |
| 13 | AEP2   | YMR282C   | YPDcl2 | YPDcl3 | EtOHcl1 | EtOHcl2 | Galcl1 | YPDnc1 | YPDnc2 | YPDnc3 | YPDnc4 | EtOHnc1 | EtOHnc2 | Galnc1 | Galnc2 |
| 13 | CIR1   | YGR207C   | YPDcl2 | YPDcl3 | EtOHcl1 | EtOHcl2 | Galcl1 | YPDnc1 | YPDnc2 | YPDnc3 | YPDnc4 | EtOHnc1 | EtOHnc2 | Galnc1 | Galnc2 |
| 13 |        | YOR225W   | YPDcl2 | YPDcl3 | EtOHcl1 | EtOHcl2 | Galcl1 | YPDnc1 | YPDnc2 | YPDnc3 | YPDnc4 | EtOHnc1 | EtOHnc2 | Galnc1 | Galnc2 |
| 13 |        | YJL062W-A | YPDcl2 | YPDcl3 | EtOHcl1 | EtOHcl2 | Galcl1 | YPDnc1 | YPDnc2 | YPDnc3 | YPDnc4 | EtOHnc1 | EtOHnc2 | Galnc1 | Galnc2 |
| 13 | CUE5   | YOR042W   | YPDcl2 | YPDcl3 | EtOHcl1 | EtOHcl2 | Galcl1 | YPDnc1 | YPDnc2 | YPDnc3 | YPDnc4 | EtOHnc1 | EtOHnc2 | Galnc1 | Galnc2 |
| 13 |        | YHR131W-  | YPDcl2 | YPDcl3 | EtOHcl1 | EtOHcl2 | Galcl1 | YPDnc1 | YPDnc2 | YPDnc3 | YPDnc4 | EtOHnc1 | EtOHnc2 | Galnc1 | Galnc2 |
| 13 | GUD1   | YDL238C   | YPDcl2 | YPDcl3 | EtOHcl1 | EtOHcl2 | Galcl1 | YPDnc1 | YPDnc2 | YPDnc3 | YPDnc4 | EtOHnc1 | EtOHnc2 | Galnc1 | Galnc2 |
| 13 | PFD1   | YJL179W   | YPDcl2 | YPDcl3 | EtOHcl1 | EtOHcl2 | Galcl1 | YPDnc1 | YPDnc2 | YPDnc3 | YPDnc4 | EtOHnc1 | EtOHnc2 | Galnc1 | Galnc2 |
| 13 |        | YJR111C   | YPDcl2 | YPDcl3 | EtOHcl1 | EtOHcl2 | Galcl1 | YPDnc1 | YPDnc2 | YPDnc3 | YPDnc4 | EtOHnc1 | EtOHnc2 | Galnc1 | Galnc2 |
| 13 | ABP1   | YCR088W   | YPDcl2 | YPDcl3 | EtOHcl1 | EtOHcl2 | Galcl1 | YPDnc1 | YPDnc2 | YPDnc3 | YPDnc4 | EtOHnc1 | EtOHnc2 | Galnc1 | Galnc2 |
| 13 | DAL2   | YIR029W   | YPDcl2 | YPDcl3 | EtOHcl1 | EtOHcl2 | Galcl1 | YPDnc1 | YPDnc2 | YPDnc3 | YPDnc4 | EtOHnc1 | EtOHnc2 | Galnc1 | Galnc2 |
| 13 | TRM10  | YOL093W   | YPDcl2 | YPDcl3 | EtOHcl1 | EtOHcl2 | Galcl1 | YPDnc1 | YPDnc2 | YPDnc3 | YPDnc4 | EtOHnc1 | EtOHnc2 | Galnc1 | Galnc2 |
| 13 |        | YJL144W   | YPDcl2 | YPDcl3 | EtOHcl1 | EtOHcl2 | Galcl1 | YPDnc1 | YPDnc2 | YPDnc3 | YPDnc4 | EtOHnc1 | EtOHnc2 | Galnc1 | Galnc2 |
| 13 | NUP159 | YIL115C   | YPDcl2 | YPDcl3 | EtOHcl1 | EtOHcl2 | Galcl1 | YPDnc1 | YPDnc2 | YPDnc3 | YPDnc4 | EtOHnc1 | EtOHnc2 | Galnc1 | Galnc2 |
| 13 | CTF13  | YMR094W   | YPDcl2 | YPDcl3 | EtOHcl1 | EtOHcl2 | Galcl1 | YPDnc1 | YPDnc2 | YPDnc3 | YPDnc4 | EtOHnc1 | EtOHnc2 | Galnc1 | Galnc2 |

|           |           |        |        |         |         |        |        |        |        |        |         |         |        |        |
|-----------|-----------|--------|--------|---------|---------|--------|--------|--------|--------|--------|---------|---------|--------|--------|
| 13        | YLR217W   | YPDcl2 | YPDcl3 | EtOHcl1 | EtOHcl2 | Galcl1 | YPDnc1 | YPDnc2 | YPDnc3 | YPDnc4 | EtOHnc1 | EtOHnc2 | Galnc1 | Galnc2 |
| 13 PML39  | YML107C   | YPDcl2 | YPDcl3 | EtOHcl1 | EtOHcl2 | Galcl1 | YPDnc1 | YPDnc2 | YPDnc3 | YPDnc4 | EtOHnc1 | EtOHnc2 | Galnc1 | Galnc2 |
| 13 SYG1   | YIL047C   | YPDcl2 | YPDcl3 | EtOHcl1 | EtOHcl2 | Galcl1 | YPDnc1 | YPDnc2 | YPDnc3 | YPDnc4 | EtOHnc1 | EtOHnc2 | Galnc1 | Galnc2 |
| 13        | YHR130C   | YPDcl2 | YPDcl3 | EtOHcl1 | EtOHcl2 | Galcl1 | YPDnc1 | YPDnc2 | YPDnc3 | YPDnc4 | EtOHnc1 | EtOHnc2 | Galnc1 | Galnc2 |
| 13 MLS1   | YNL117W   | YPDcl2 | YPDcl3 | EtOHcl1 | EtOHcl2 | Galcl1 | YPDnc1 | YPDnc2 | YPDnc3 | YPDnc4 | EtOHnc1 | EtOHnc2 | Galnc1 | Galnc2 |
| 13 PHO4   | YFR034C   | YPDcl2 | YPDcl3 | EtOHcl1 | EtOHcl2 | Galcl1 | YPDnc1 | YPDnc2 | YPDnc3 | YPDnc4 | EtOHnc1 | EtOHnc2 | Galnc1 | Galnc2 |
| 13        | YDL172C   | YPDcl2 | YPDcl3 | EtOHcl1 | EtOHcl2 | Galcl1 | YPDnc1 | YPDnc2 | YPDnc3 | YPDnc4 | EtOHnc1 | EtOHnc2 | Galnc1 | Galnc2 |
| 13        | YPL066W   | YPDcl2 | YPDcl3 | EtOHcl1 | EtOHcl2 | Galcl1 | YPDnc1 | YPDnc2 | YPDnc3 | YPDnc4 | EtOHnc1 | EtOHnc2 | Galnc1 | Galnc2 |
| 13 ALK1   | YGL021W   | YPDcl2 | YPDcl3 | EtOHcl1 | EtOHcl2 | Galcl1 | YPDnc1 | YPDnc2 | YPDnc3 | YPDnc4 | EtOHnc1 | EtOHnc2 | Galnc1 | Galnc2 |
| 13        | YAL034C-B | YPDcl2 | YPDcl3 | EtOHcl1 | EtOHcl2 | Galcl1 | YPDnc1 | YPDnc2 | YPDnc3 | YPDnc4 | EtOHnc1 | EtOHnc2 | Galnc1 | Galnc2 |
| 13 YAK1   | YJL141C   | YPDcl2 | YPDcl3 | EtOHcl1 | EtOHcl2 | Galcl1 | YPDnc1 | YPDnc2 | YPDnc3 | YPDnc4 | EtOHnc1 | EtOHnc2 | Galnc1 | Galnc2 |
| 13 INP53  | YOR109W   | YPDcl2 | YPDcl3 | EtOHcl1 | EtOHcl2 | Galcl1 | YPDnc1 | YPDnc2 | YPDnc3 | YPDnc4 | EtOHnc1 | EtOHnc2 | Galnc1 | Galnc2 |
| 13 SDS22  | YKL193C   | YPDcl2 | YPDcl3 | EtOHcl1 | EtOHcl2 | Galcl1 | YPDnc1 | YPDnc2 | YPDnc3 | YPDnc4 | EtOHnc1 | EtOHnc2 | Galnc1 | Galnc2 |
| 13 PXL1   | YKR090W   | YPDcl2 | YPDcl3 | EtOHcl1 | EtOHcl2 | Galcl1 | YPDnc1 | YPDnc2 | YPDnc3 | YPDnc4 | EtOHnc1 | EtOHnc2 | Galnc1 | Galnc2 |
| 13 IML3   | YBR107C   | YPDcl2 | YPDcl3 | EtOHcl1 | EtOHcl2 | Galcl1 | YPDnc1 | YPDnc2 | YPDnc3 | YPDnc4 | EtOHnc1 | EtOHnc2 | Galnc1 | Galnc2 |
| 13 YRR1   | YOR162C   | YPDcl2 | YPDcl3 | EtOHcl1 | EtOHcl2 | Galcl1 | YPDnc1 | YPDnc2 | YPDnc3 | YPDnc4 | EtOHnc1 | EtOHnc2 | Galnc1 | Galnc2 |
| 13 NTG2   | YOL043C   | YPDcl2 | YPDcl3 | EtOHcl1 | EtOHcl2 | Galcl1 | YPDnc1 | YPDnc2 | YPDnc3 | YPDnc4 | EtOHnc1 | EtOHnc2 | Galnc1 | Galnc2 |
| 13 ARO4   | YBR249C   | YPDcl2 | YPDcl3 | EtOHcl1 | EtOHcl2 | Galcl1 | YPDnc1 | YPDnc2 | YPDnc3 | YPDnc4 | EtOHnc1 | EtOHnc2 | Galnc1 | Galnc2 |
| 13 SPO12  | YHR152W   | YPDcl2 | YPDcl3 | EtOHcl1 | EtOHcl2 | Galcl1 | YPDnc1 | YPDnc2 | YPDnc3 | YPDnc4 | EtOHnc1 | EtOHnc2 | Galnc1 | Galnc2 |
| 13 FET5   | YFL041W   | YPDcl2 | YPDcl3 | EtOHcl1 | EtOHcl2 | Galcl1 | YPDnc1 | YPDnc2 | YPDnc3 | YPDnc4 | EtOHnc1 | EtOHnc2 | Galnc1 | Galnc2 |
| 13 ATF1   | YOR377W   | YPDcl2 | YPDcl3 | EtOHcl1 | EtOHcl2 | Galcl1 | YPDnc1 | YPDnc2 | YPDnc3 | YPDnc4 | EtOHnc1 | EtOHnc2 | Galnc1 | Galnc2 |
| 13 FAT1   | YBR041W   | YPDcl2 | YPDcl3 | EtOHcl1 | EtOHcl2 | Galcl1 | YPDnc1 | YPDnc2 | YPDnc3 | YPDnc4 | EtOHnc1 | EtOHnc2 | Galnc1 | Galnc2 |
| 13        | YNL028W   | YPDcl2 | YPDcl3 | EtOHcl1 | EtOHcl2 | Galcl1 | YPDnc1 | YPDnc2 | YPDnc3 | YPDnc4 | EtOHnc1 | EtOHnc2 | Galnc1 | Galnc2 |
| 13 PGM3   | YMR278W   | YPDcl2 | YPDcl3 | EtOHcl1 | EtOHcl2 | Galcl1 | YPDnc1 | YPDnc2 | YPDnc3 | YPDnc4 | EtOHnc1 | EtOHnc2 | Galnc1 | Galnc2 |
| 13 NRD1   | YNL251C   | YPDcl2 | YPDcl3 | EtOHcl1 | EtOHcl2 | Galcl1 | YPDnc1 | YPDnc2 | YPDnc3 | YPDnc4 | EtOHnc1 | EtOHnc2 | Galnc1 | Galnc2 |
| 13        | YMR310C   | YPDcl2 | YPDcl3 | EtOHcl1 | EtOHcl2 | Galcl1 | YPDnc1 | YPDnc2 | YPDnc3 | YPDnc4 | EtOHnc1 | EtOHnc2 | Galnc1 | Galnc2 |
| 13        | YNL058C   | YPDcl2 | YPDcl3 | EtOHcl1 | EtOHcl2 | Galcl1 | YPDnc1 | YPDnc2 | YPDnc3 | YPDnc4 | EtOHnc1 | EtOHnc2 | Galnc1 | Galnc2 |
| 13 RTT105 | YER104W   | YPDcl2 | YPDcl3 | EtOHcl1 | EtOHcl2 | Galcl1 | YPDnc1 | YPDnc2 | YPDnc3 | YPDnc4 | EtOHnc1 | EtOHnc2 | Galnc1 | Galnc2 |
| 13 GPI18  | YBR004C   | YPDcl2 | YPDcl3 | EtOHcl1 | EtOHcl2 | Galcl1 | YPDnc1 | YPDnc2 | YPDnc3 | YPDnc4 | EtOHnc1 | EtOHnc2 | Galnc1 | Galnc2 |
| 13 FUM1   | YPL262W   | YPDcl2 | YPDcl3 | EtOHcl1 | EtOHcl2 | Galcl1 | YPDnc1 | YPDnc2 | YPDnc3 | YPDnc4 | EtOHnc1 | EtOHnc2 | Galnc1 | Galnc2 |
| 13        | YIR020C-B | YPDcl2 | YPDcl3 | EtOHcl1 | EtOHcl2 | Galcl1 | YPDnc1 | YPDnc2 | YPDnc3 | YPDnc4 | EtOHnc1 | EtOHnc2 | Galnc1 | Galnc2 |
| 13 BOP2   | YLR267W   | YPDcl2 | YPDcl3 | EtOHcl1 | EtOHcl2 | Galcl1 | YPDnc1 | YPDnc2 | YPDnc3 | YPDnc4 | EtOHnc1 | EtOHnc2 | Galnc1 | Galnc2 |
| 13 SPO71  | YDR104C   | YPDcl2 | YPDcl3 | EtOHcl1 | EtOHcl2 | Galcl1 | YPDnc1 | YPDnc2 | YPDnc3 | YPDnc4 | EtOHnc1 | EtOHnc2 | Galnc1 | Galnc2 |
| 13        | YKL106C-A | YPDcl2 | YPDcl3 | EtOHcl1 | EtOHcl2 | Galcl1 | YPDnc1 | YPDnc2 | YPDnc3 | YPDnc4 | EtOHnc1 | EtOHnc2 | Galnc1 | Galnc2 |

|           |           |        |        |         |         |        |        |        |        |        |         |         |        |        |
|-----------|-----------|--------|--------|---------|---------|--------|--------|--------|--------|--------|---------|---------|--------|--------|
| 13 RAD18  | YCR066W   | YPDcl2 | YPDcl3 | EtOHcl1 | EtOHcl2 | Galcl1 | YPDnc1 | YPDnc2 | YPDnc3 | YPDnc4 | EtOHnc1 | EtOHnc2 | Galnc1 | Galnc2 |
| 13        | YBL068W-A | YPDcl2 | YPDcl3 | EtOHcl1 | EtOHcl2 | Galcl1 | YPDnc1 | YPDnc2 | YPDnc3 | YPDnc4 | EtOHnc1 | EtOHnc2 | Galnc1 | Galnc2 |
| 13 SWD3   | YBR175W   | YPDcl2 | YPDcl3 | EtOHcl1 | EtOHcl2 | Galcl1 | YPDnc1 | YPDnc2 | YPDnc3 | YPDnc4 | EtOHnc1 | EtOHnc2 | Galnc1 | Galnc2 |
| 13 GPI1   | YGR216C   | YPDcl2 | YPDcl3 | EtOHcl1 | EtOHcl2 | Galcl1 | YPDnc1 | YPDnc2 | YPDnc3 | YPDnc4 | EtOHnc1 | EtOHnc2 | Galnc1 | Galnc2 |
| 13 VID22  | YLR373C   | YPDcl2 | YPDcl3 | EtOHcl1 | EtOHcl2 | Galcl1 | YPDnc1 | YPDnc2 | YPDnc3 | YPDnc4 | EtOHnc1 | EtOHnc2 | Galnc1 | Galnc2 |
| 13 AFG1   | YEL052W   | YPDcl2 | YPDcl3 | EtOHcl1 | EtOHcl2 | Galcl1 | YPDnc1 | YPDnc2 | YPDnc3 | YPDnc4 | EtOHnc1 | EtOHnc2 | Galnc1 | Galnc2 |
| 13 NOP14  | YDL148C   | YPDcl2 | YPDcl3 | EtOHcl1 | EtOHcl2 | Galcl1 | YPDnc1 | YPDnc2 | YPDnc3 | YPDnc4 | EtOHnc1 | EtOHnc2 | Galnc1 | Galnc2 |
| 13 MCK1   | YNL307C   | YPDcl2 | YPDcl3 | EtOHcl1 | EtOHcl2 | Galcl1 | YPDnc1 | YPDnc2 | YPDnc3 | YPDnc4 | EtOHnc1 | EtOHnc2 | Galnc1 | Galnc2 |
| 13 LSM6   | YDR378C   | YPDcl2 | YPDcl3 | EtOHcl1 | EtOHcl2 | Galcl1 | YPDnc1 | YPDnc2 | YPDnc3 | YPDnc4 | EtOHnc1 | EtOHnc2 | Galnc1 | Galnc2 |
| 13 IB12   | YMR295C   | YPDcl2 | YPDcl3 | EtOHcl1 | EtOHcl2 | Galcl1 | YPDnc1 | YPDnc2 | YPDnc3 | YPDnc4 | EtOHnc1 | EtOHnc2 | Galnc1 | Galnc2 |
| 13 CCT2   | YIL142W   | YPDcl2 | YPDcl3 | EtOHcl1 | EtOHcl2 | Galcl1 | YPDnc1 | YPDnc2 | YPDnc3 | YPDnc4 | EtOHnc1 | EtOHnc2 | Galnc1 | Galnc2 |
| 13 MDM1   | YML104C   | YPDcl2 | YPDcl3 | EtOHcl1 | EtOHcl2 | Galcl1 | YPDnc1 | YPDnc2 | YPDnc3 | YPDnc4 | EtOHnc1 | EtOHnc2 | Galnc1 | Galnc2 |
| 13 CYC1   | YJR048W   | YPDcl2 | YPDcl3 | EtOHcl1 | EtOHcl2 | Galcl1 | YPDnc1 | YPDnc2 | YPDnc3 | YPDnc4 | EtOHnc1 | EtOHnc2 | Galnc1 | Galnc2 |
| 13 AIM45  | YPR004C   | YPDcl2 | YPDcl3 | EtOHcl1 | EtOHcl2 | Galcl1 | YPDnc1 | YPDnc2 | YPDnc3 | YPDnc4 | EtOHnc1 | EtOHnc2 | Galnc1 | Galnc2 |
| 13 COS12  | YGL263W   | YPDcl2 | YPDcl3 | EtOHcl1 | EtOHcl2 | Galcl1 | YPDnc1 | YPDnc2 | YPDnc3 | YPDnc4 | EtOHnc1 | EtOHnc2 | Galnc1 | Galnc2 |
| 13        | YMR034C   | YPDcl2 | YPDcl3 | EtOHcl1 | EtOHcl2 | Galcl1 | YPDnc1 | YPDnc2 | YPDnc3 | YPDnc4 | EtOHnc1 | EtOHnc2 | Galnc1 | Galnc2 |
| 13 SKI6   | YGR195W   | YPDcl2 | YPDcl3 | EtOHcl1 | EtOHcl2 | Galcl1 | YPDnc1 | YPDnc2 | YPDnc3 | YPDnc4 | EtOHnc1 | EtOHnc2 | Galnc1 | Galnc2 |
| 13 BUB2   | YMR055C   | YPDcl2 | YPDcl3 | EtOHcl1 | EtOHcl2 | Galcl1 | YPDnc1 | YPDnc2 | YPDnc3 | YPDnc4 | EtOHnc1 | EtOHnc2 | Galnc1 | Galnc2 |
| 13 GRX7   | YBR014C   | YPDcl2 | YPDcl3 | EtOHcl1 | EtOHcl2 | Galcl1 | YPDnc1 | YPDnc2 | YPDnc3 | YPDnc4 | EtOHnc1 | EtOHnc2 | Galnc1 | Galnc2 |
| 13 RPP2A  | YOL039W   | YPDcl2 | YPDcl3 | EtOHcl1 | EtOHcl2 | Galcl1 | YPDnc1 | YPDnc2 | YPDnc3 | YPDnc4 | EtOHnc1 | EtOHnc2 | Galnc1 | Galnc2 |
| 13 VMA6   | YLR447C   | YPDcl2 | YPDcl3 | EtOHcl1 | EtOHcl2 | Galcl1 | YPDnc1 | YPDnc2 | YPDnc3 | YPDnc4 | EtOHnc1 | EtOHnc2 | Galnc1 | Galnc2 |
| 13 HTZ1   | YOL012C   | YPDcl2 | YPDcl3 | EtOHcl1 | EtOHcl2 | Galcl1 | YPDnc1 | YPDnc2 | YPDnc3 | YPDnc4 | EtOHnc1 | EtOHnc2 | Galnc1 | Galnc2 |
| 13 PEX14  | YGL153W   | YPDcl2 | YPDcl3 | EtOHcl1 | EtOHcl2 | Galcl1 | YPDnc1 | YPDnc2 | YPDnc3 | YPDnc4 | EtOHnc1 | EtOHnc2 | Galnc1 | Galnc2 |
| 13 MEP3   | YPR138C   | YPDcl2 | YPDcl3 | EtOHcl1 | EtOHcl2 | Galcl1 | YPDnc1 | YPDnc2 | YPDnc3 | YPDnc4 | EtOHnc1 | EtOHnc2 | Galnc1 | Galnc2 |
| 13 MSM1   | YGR171C   | YPDcl2 | YPDcl3 | EtOHcl1 | EtOHcl2 | Galcl1 | YPDnc1 | YPDnc2 | YPDnc3 | YPDnc4 | EtOHnc1 | EtOHnc2 | Galnc1 | Galnc2 |
| 13 MDM10  | YAL010C   | YPDcl2 | YPDcl3 | EtOHcl1 | EtOHcl2 | Galcl1 | YPDnc1 | YPDnc2 | YPDnc3 | YPDnc4 | EtOHnc1 | EtOHnc2 | Galnc1 | Galnc2 |
| 13 TPK3   | YKL166C   | YPDcl2 | YPDcl3 | EtOHcl1 | EtOHcl2 | Galcl1 | YPDnc1 | YPDnc2 | YPDnc3 | YPDnc4 | EtOHnc1 | EtOHnc2 | Galnc1 | Galnc2 |
| 13 FPR3   | YML074C   | YPDcl2 | YPDcl3 | EtOHcl1 | EtOHcl2 | Galcl1 | YPDnc1 | YPDnc2 | YPDnc3 | YPDnc4 | EtOHnc1 | EtOHnc2 | Galnc1 | Galnc2 |
| 13        | YJR151W-A | YPDcl2 | YPDcl3 | EtOHcl1 | EtOHcl2 | Galcl1 | YPDnc1 | YPDnc2 | YPDnc3 | YPDnc4 | EtOHnc1 | EtOHnc2 | Galnc1 | Galnc2 |
| 13 PRP2   | YNR011C   | YPDcl2 | YPDcl3 | EtOHcl1 | EtOHcl2 | Galcl1 | YPDnc1 | YPDnc2 | YPDnc3 | YPDnc4 | EtOHnc1 | EtOHnc2 | Galnc1 | Galnc2 |
| 13 SEM1   | YDR363W-  | YPDcl2 | YPDcl3 | EtOHcl1 | EtOHcl2 | Galcl1 | YPDnc1 | YPDnc2 | YPDnc3 | YPDnc4 | EtOHnc1 | EtOHnc2 | Galnc1 | Galnc2 |
| 13 RTT109 | YLL002W   | YPDcl2 | YPDcl3 | EtOHcl1 | EtOHcl2 | Galcl1 | YPDnc1 | YPDnc2 | YPDnc3 | YPDnc4 | EtOHnc1 | EtOHnc2 | Galnc1 | Galnc2 |
| 13 PUF3   | YLL013C   | YPDcl2 | YPDcl3 | EtOHcl1 | EtOHcl2 | Galcl1 | YPDnc1 | YPDnc2 | YPDnc3 | YPDnc4 | EtOHnc1 | EtOHnc2 | Galnc1 | Galnc2 |
| 13 SUR4   | YLR372W   | YPDcl2 | YPDcl3 | EtOHcl1 | EtOHcl2 | Galcl1 | YPDnc1 | YPDnc2 | YPDnc3 | YPDnc4 | EtOHnc1 | EtOHnc2 | Galnc1 | Galnc2 |

|    |        |           |        |        |         |         |        |        |        |        |        |         |         |        |        |
|----|--------|-----------|--------|--------|---------|---------|--------|--------|--------|--------|--------|---------|---------|--------|--------|
| 13 | CYC2   | YOR037W   | YPDcl2 | YPDcl3 | EtOHcl1 | EtOHcl2 | Galcl1 | YPDnc1 | YPDnc2 | YPDnc3 | YPDnc4 | EtOHnc1 | EtOHnc2 | Galnc1 | Galnc2 |
| 13 | ARN2   | YHL047C   | YPDcl2 | YPDcl3 | EtOHcl1 | EtOHcl2 | Galcl1 | YPDnc1 | YPDnc2 | YPDnc3 | YPDnc4 | EtOHnc1 | EtOHnc2 | Galnc1 | Galnc2 |
| 13 | NOP16  | YER002W   | YPDcl2 | YPDcl3 | EtOHcl1 | EtOHcl2 | Galcl1 | YPDnc1 | YPDnc2 | YPDnc3 | YPDnc4 | EtOHnc1 | EtOHnc2 | Galnc1 | Galnc2 |
| 13 | PST2   | YDR032C   | YPDcl2 | YPDcl3 | EtOHcl1 | EtOHcl2 | Galcl1 | YPDnc1 | YPDnc2 | YPDnc3 | YPDnc4 | EtOHnc1 | EtOHnc2 | Galnc1 | Galnc2 |
| 13 |        | YJL133C-A | YPDcl2 | YPDcl3 | EtOHcl1 | EtOHcl2 | Galcl1 | YPDnc1 | YPDnc2 | YPDnc3 | YPDnc4 | EtOHnc1 | EtOHnc2 | Galnc1 | Galnc2 |
| 13 | ABM1   | YJR108W   | YPDcl2 | YPDcl3 | EtOHcl1 | EtOHcl2 | Galcl1 | YPDnc1 | YPDnc2 | YPDnc3 | YPDnc4 | EtOHnc1 | EtOHnc2 | Galnc1 | Galnc2 |
| 13 | SNT1   | YCR033W   | YPDcl2 | YPDcl3 | EtOHcl1 | EtOHcl2 | Galcl1 | YPDnc1 | YPDnc2 | YPDnc3 | YPDnc4 | EtOHnc1 | EtOHnc2 | Galnc1 | Galnc2 |
| 13 | CCT3   | YJL014W   | YPDcl2 | YPDcl3 | EtOHcl1 | EtOHcl2 | Galcl1 | YPDnc1 | YPDnc2 | YPDnc3 | YPDnc4 | EtOHnc1 | EtOHnc2 | Galnc1 | Galnc2 |
| 13 | IAH1   | YOR126C   | YPDcl2 | YPDcl3 | EtOHcl1 | EtOHcl2 | Galcl1 | YPDnc1 | YPDnc2 | YPDnc3 | YPDnc4 | EtOHnc1 | EtOHnc2 | Galnc1 | Galnc2 |
| 13 | RTT101 | YJL047C   | YPDcl2 | YPDcl3 | EtOHcl1 | EtOHcl2 | Galcl1 | YPDnc1 | YPDnc2 | YPDnc3 | YPDnc4 | EtOHnc1 | EtOHnc2 | Galnc1 | Galnc2 |
| 13 |        | YDL118W   | YPDcl2 | YPDcl3 | EtOHcl1 | EtOHcl2 | Galcl1 | YPDnc1 | YPDnc2 | YPDnc3 | YPDnc4 | EtOHnc1 | EtOHnc2 | Galnc1 | Galnc2 |
| 13 |        | YER133W-  | YPDcl2 | YPDcl3 | EtOHcl1 | EtOHcl2 | Galcl1 | YPDnc1 | YPDnc2 | YPDnc3 | YPDnc4 | EtOHnc1 | EtOHnc2 | Galnc1 | Galnc2 |
| 13 | UPS1   | YLR193C   | YPDcl2 | YPDcl3 | EtOHcl1 | EtOHcl2 | Galcl1 | YPDnc1 | YPDnc2 | YPDnc3 | YPDnc4 | EtOHnc1 | EtOHnc2 | Galnc1 | Galnc2 |
| 13 | MCM3   | YEL032W   | YPDcl2 | YPDcl3 | EtOHcl1 | EtOHcl2 | Galcl1 | YPDnc1 | YPDnc2 | YPDnc3 | YPDnc4 | EtOHnc1 | EtOHnc2 | Galnc1 | Galnc2 |
| 13 | FUS3   | YBL016W   | YPDcl2 | YPDcl3 | EtOHcl1 | EtOHcl2 | Galcl1 | YPDnc1 | YPDnc2 | YPDnc3 | YPDnc4 | EtOHnc1 | EtOHnc2 | Galnc1 | Galnc2 |
| 13 | ERP1   | YAR002C-A | YPDcl2 | YPDcl3 | EtOHcl1 | EtOHcl2 | Galcl1 | YPDnc1 | YPDnc2 | YPDnc3 | YPDnc4 | EtOHnc1 | EtOHnc2 | Galnc1 | Galnc2 |
| 13 | OPY1   | YBR129C   | YPDcl2 | YPDcl3 | EtOHcl1 | EtOHcl2 | Galcl1 | YPDnc1 | YPDnc2 | YPDnc3 | YPDnc4 | EtOHnc1 | EtOHnc2 | Galnc1 | Galnc2 |
| 13 | OGG1   | YML060W   | YPDcl2 | YPDcl3 | EtOHcl1 | EtOHcl2 | Galcl1 | YPDnc1 | YPDnc2 | YPDnc3 | YPDnc4 | EtOHnc1 | EtOHnc2 | Galnc1 | Galnc2 |
| 13 |        | YLR218C   | YPDcl2 | YPDcl3 | EtOHcl1 | EtOHcl2 | Galcl1 | YPDnc1 | YPDnc2 | YPDnc3 | YPDnc4 | EtOHnc1 | EtOHnc2 | Galnc1 | Galnc2 |
| 13 | MSF1   | YPR047W   | YPDcl2 | YPDcl3 | EtOHcl1 | EtOHcl2 | Galcl1 | YPDnc1 | YPDnc2 | YPDnc3 | YPDnc4 | EtOHnc1 | EtOHnc2 | Galnc1 | Galnc2 |
| 13 | SLP1   | YOR154W   | YPDcl2 | YPDcl3 | EtOHcl1 | EtOHcl2 | Galcl1 | YPDnc1 | YPDnc2 | YPDnc3 | YPDnc4 | EtOHnc1 | EtOHnc2 | Galnc1 | Galnc2 |
| 13 |        | YPR170W-  | YPDcl2 | YPDcl3 | EtOHcl1 | EtOHcl2 | Galcl1 | YPDnc1 | YPDnc2 | YPDnc3 | YPDnc4 | EtOHnc1 | EtOHnc2 | Galnc1 | Galnc2 |
| 13 |        | YKL123W   | YPDcl2 | YPDcl3 | EtOHcl1 | EtOHcl2 | Galcl1 | YPDnc1 | YPDnc2 | YPDnc3 | YPDnc4 | EtOHnc1 | EtOHnc2 | Galnc1 | Galnc2 |
| 13 | SEH1   | YGL100W   | YPDcl2 | YPDcl3 | EtOHcl1 | EtOHcl2 | Galcl1 | YPDnc1 | YPDnc2 | YPDnc3 | YPDnc4 | EtOHnc1 | EtOHnc2 | Galnc1 | Galnc2 |
| 13 |        | YDR510C-A | YPDcl2 | YPDcl3 | EtOHcl1 | EtOHcl2 | Galcl1 | YPDnc1 | YPDnc2 | YPDnc3 | YPDnc4 | EtOHnc1 | EtOHnc2 | Galnc1 | Galnc2 |
| 13 | MSS51  | YLR203C   | YPDcl2 | YPDcl3 | EtOHcl1 | EtOHcl2 | Galcl1 | YPDnc1 | YPDnc2 | YPDnc3 | YPDnc4 | EtOHnc1 | EtOHnc2 | Galnc1 | Galnc2 |
| 13 | CDC123 | YLR215C   | YPDcl2 | YPDcl3 | EtOHcl1 | EtOHcl2 | Galcl1 | YPDnc1 | YPDnc2 | YPDnc3 | YPDnc4 | EtOHnc1 | EtOHnc2 | Galnc1 | Galnc2 |
| 13 | GDH1   | YOR375C   | YPDcl2 | YPDcl3 | EtOHcl1 | EtOHcl2 | Galcl1 | YPDnc1 | YPDnc2 | YPDnc3 | YPDnc4 | EtOHnc1 | EtOHnc2 | Galnc1 | Galnc2 |
| 13 | SSF1   | YHR066W   | YPDcl2 | YPDcl3 | EtOHcl1 | EtOHcl2 | Galcl1 | YPDnc1 | YPDnc2 | YPDnc3 | YPDnc4 | EtOHnc1 | EtOHnc2 | Galnc1 | Galnc2 |
| 13 |        | YLR312C   | YPDcl2 | YPDcl3 | EtOHcl1 | EtOHcl2 | Galcl1 | YPDnc1 | YPDnc2 | YPDnc3 | YPDnc4 | EtOHnc1 | EtOHnc2 | Galnc1 | Galnc2 |
| 13 |        | YHR122W   | YPDcl2 | YPDcl3 | EtOHcl1 | EtOHcl2 | Galcl1 | YPDnc1 | YPDnc2 | YPDnc3 | YPDnc4 | EtOHnc1 | EtOHnc2 | Galnc1 | Galnc2 |
| 13 | GLT1   | YDL171C   | YPDcl2 | YPDcl3 | EtOHcl1 | EtOHcl2 | Galcl1 | YPDnc1 | YPDnc2 | YPDnc3 | YPDnc4 | EtOHnc1 | EtOHnc2 | Galnc1 | Galnc2 |
| 13 |        | YEL068C   | YPDcl2 | YPDcl3 | EtOHcl1 | EtOHcl2 | Galcl1 | YPDnc1 | YPDnc2 | YPDnc3 | YPDnc4 | EtOHnc1 | EtOHnc2 | Galnc1 | Galnc2 |
| 13 | GIM5   | YML094W   | YPDcl2 | YPDcl3 | EtOHcl1 | EtOHcl2 | Galcl1 | YPDnc1 | YPDnc2 | YPDnc3 | YPDnc4 | EtOHnc1 | EtOHnc2 | Galnc1 | Galnc2 |



|           |           |        |        |         |         |        |        |        |        |        |         |         |        |        |
|-----------|-----------|--------|--------|---------|---------|--------|--------|--------|--------|--------|---------|---------|--------|--------|
| 13 SKT5   | YBL061C   | YPDcl2 | YPDcl3 | EtOHcl1 | EtOHcl2 | Galcl1 | YPDnc1 | YPDnc2 | YPDnc3 | YPDnc4 | EtOHnc1 | EtOHnc2 | Galnc1 | Galnc2 |
| 13 FAP1   | YNL023C   | YPDcl2 | YPDcl3 | EtOHcl1 | EtOHcl2 | Galcl1 | YPDnc1 | YPDnc2 | YPDnc3 | YPDnc4 | EtOHnc1 | EtOHnc2 | Galnc1 | Galnc2 |
| 13 BOR1   | YNL275W   | YPDcl2 | YPDcl3 | EtOHcl1 | EtOHcl2 | Galcl1 | YPDnc1 | YPDnc2 | YPDnc3 | YPDnc4 | EtOHnc1 | EtOHnc2 | Galnc1 | Galnc2 |
| 13        | YGR016W   | YPDcl2 | YPDcl3 | EtOHcl1 | EtOHcl2 | Galcl1 | YPDnc1 | YPDnc2 | YPDnc3 | YPDnc4 | EtOHnc1 | EtOHnc2 | Galnc1 | Galnc2 |
| 13        | YKR005C   | YPDcl2 | YPDcl3 | EtOHcl1 | EtOHcl2 | Galcl1 | YPDnc1 | YPDnc2 | YPDnc3 | YPDnc4 | EtOHnc1 | EtOHnc2 | Galnc1 | Galnc2 |
| 13        | YJL206C   | YPDcl2 | YPDcl3 | EtOHcl1 | EtOHcl2 | Galcl1 | YPDnc1 | YPDnc2 | YPDnc3 | YPDnc4 | EtOHnc1 | EtOHnc2 | Galnc1 | Galnc2 |
| 13 ACP1   | YKL192C   | YPDcl2 | YPDcl3 | EtOHcl1 | EtOHcl2 | Galcl1 | YPDnc1 | YPDnc2 | YPDnc3 | YPDnc4 | EtOHnc1 | EtOHnc2 | Galnc1 | Galnc2 |
| 13 DDI1   | YER143W   | YPDcl2 | YPDcl3 | EtOHcl1 | EtOHcl2 | Galcl1 | YPDnc1 | YPDnc2 | YPDnc3 | YPDnc4 | EtOHnc1 | EtOHnc2 | Galnc1 | Galnc2 |
| 13 SPT14  | YPL175W   | YPDcl2 | YPDcl3 | EtOHcl1 | EtOHcl2 | Galcl1 | YPDnc1 | YPDnc2 | YPDnc3 | YPDnc4 | EtOHnc1 | EtOHnc2 | Galnc1 | Galnc2 |
| 13        | YOR329W-  | YPDcl2 | YPDcl3 | EtOHcl1 | EtOHcl2 | Galcl1 | YPDnc1 | YPDnc2 | YPDnc3 | YPDnc4 | EtOHnc1 | EtOHnc2 | Galnc1 | Galnc2 |
| 13 MRPS5  | YBR251W   | YPDcl2 | YPDcl3 | EtOHcl1 | EtOHcl2 | Galcl1 | YPDnc1 | YPDnc2 | YPDnc3 | YPDnc4 | EtOHnc1 | EtOHnc2 | Galnc1 | Galnc2 |
| 13 QCR8   | YJL166W   | YPDcl2 | YPDcl3 | EtOHcl1 | EtOHcl2 | Galcl1 | YPDnc1 | YPDnc2 | YPDnc3 | YPDnc4 | EtOHnc1 | EtOHnc2 | Galnc1 | Galnc2 |
| 13 MSK1   | YNL073W   | YPDcl2 | YPDcl3 | EtOHcl1 | EtOHcl2 | Galcl1 | YPDnc1 | YPDnc2 | YPDnc3 | YPDnc4 | EtOHnc1 | EtOHnc2 | Galnc1 | Galnc2 |
| 13 ANT1   | YPR128C   | YPDcl2 | YPDcl3 | EtOHcl1 | EtOHcl2 | Galcl1 | YPDnc1 | YPDnc2 | YPDnc3 | YPDnc4 | EtOHnc1 | EtOHnc2 | Galnc1 | Galnc2 |
| 13 MPS2   | YGL075C   | YPDcl2 | YPDcl3 | EtOHcl1 | EtOHcl2 | Galcl1 | YPDnc1 | YPDnc2 | YPDnc3 | YPDnc4 | EtOHnc1 | EtOHnc2 | Galnc1 | Galnc2 |
| 13 EEB1   | YPL095C   | YPDcl2 | YPDcl3 | EtOHcl1 | EtOHcl2 | Galcl1 | YPDnc1 | YPDnc2 | YPDnc3 | YPDnc4 | EtOHnc1 | EtOHnc2 | Galnc1 | Galnc2 |
| 13        | YKL162C-A | YPDcl2 | YPDcl3 | EtOHcl1 | EtOHcl2 | Galcl1 | YPDnc1 | YPDnc2 | YPDnc3 | YPDnc4 | EtOHnc1 | EtOHnc2 | Galnc1 | Galnc2 |
| 13        | YPL038W-  | YPDcl2 | YPDcl3 | EtOHcl1 | EtOHcl2 | Galcl1 | YPDnc1 | YPDnc2 | YPDnc3 | YPDnc4 | EtOHnc1 | EtOHnc2 | Galnc1 | Galnc2 |
| 13 CDC21  | YOR074C   | YPDcl2 | YPDcl3 | EtOHcl1 | EtOHcl2 | Galcl1 | YPDnc1 | YPDnc2 | YPDnc3 | YPDnc4 | EtOHnc1 | EtOHnc2 | Galnc1 | Galnc2 |
| 13 RPA12  | YJR063W   | YPDcl2 | YPDcl3 | EtOHcl1 | EtOHcl2 | Galcl1 | YPDnc1 | YPDnc2 | YPDnc3 | YPDnc4 | EtOHnc1 | EtOHnc2 | Galnc1 | Galnc2 |
| 13 VHR1   | YIL056W   | YPDcl2 | YPDcl3 | EtOHcl1 | EtOHcl2 | Galcl1 | YPDnc1 | YPDnc2 | YPDnc3 | YPDnc4 | EtOHnc1 | EtOHnc2 | Galnc1 | Galnc2 |
| 13 LPP1   | YDR503C   | YPDcl2 | YPDcl3 | EtOHcl1 | EtOHcl2 | Galcl1 | YPDnc1 | YPDnc2 | YPDnc3 | YPDnc4 | EtOHnc1 | EtOHnc2 | Galnc1 | Galnc2 |
| 13 DUS1   | YML080W   | YPDcl2 | YPDcl3 | EtOHcl1 | EtOHcl2 | Galcl1 | YPDnc1 | YPDnc2 | YPDnc3 | YPDnc4 | EtOHnc1 | EtOHnc2 | Galnc1 | Galnc2 |
| 13 CTL1   | YMR180C   | YPDcl2 | YPDcl3 | EtOHcl1 | EtOHcl2 | Galcl1 | YPDnc1 | YPDnc2 | YPDnc3 | YPDnc4 | EtOHnc1 | EtOHnc2 | Galnc1 | Galnc2 |
| 13 FRE1   | YLR214W   | YPDcl2 | YPDcl3 | EtOHcl1 | EtOHcl2 | Galcl1 | YPDnc1 | YPDnc2 | YPDnc3 | YPDnc4 | EtOHnc1 | EtOHnc2 | Galnc1 | Galnc2 |
| 13 SNF5   | YBR289W   | YPDcl2 | YPDcl3 | EtOHcl1 | EtOHcl2 | Galcl1 | YPDnc1 | YPDnc2 | YPDnc3 | YPDnc4 | EtOHnc1 | EtOHnc2 | Galnc1 | Galnc2 |
| 13 DID2   | YKR035W-  | YPDcl2 | YPDcl3 | EtOHcl1 | EtOHcl2 | Galcl1 | YPDnc1 | YPDnc2 | YPDnc3 | YPDnc4 | EtOHnc1 | EtOHnc2 | Galnc1 | Galnc2 |
| 13 IPL1   | YPL209C   | YPDcl2 | YPDcl3 | EtOHcl1 | EtOHcl2 | Galcl1 | YPDnc1 | YPDnc2 | YPDnc3 | YPDnc4 | EtOHnc1 | EtOHnc2 | Galnc1 | Galnc2 |
| 13 NIP100 | YPL174C   | YPDcl2 | YPDcl3 | EtOHcl1 | EtOHcl2 | Galcl1 | YPDnc1 | YPDnc2 | YPDnc3 | YPDnc4 | EtOHnc1 | EtOHnc2 | Galnc1 | Galnc2 |
| 13 TUP1   | YCR084C   | YPDcl2 | YPDcl3 | EtOHcl1 | EtOHcl2 | Galcl1 | YPDnc1 | YPDnc2 | YPDnc3 | YPDnc4 | EtOHnc1 | EtOHnc2 | Galnc1 | Galnc2 |
| 13 CDC40  | YDR364C   | YPDcl2 | YPDcl3 | EtOHcl1 | EtOHcl2 | Galcl1 | YPDnc1 | YPDnc2 | YPDnc3 | YPDnc4 | EtOHnc1 | EtOHnc2 | Galnc1 | Galnc2 |
| 13        | YLR257W   | YPDcl2 | YPDcl3 | EtOHcl1 | EtOHcl2 | Galcl1 | YPDnc1 | YPDnc2 | YPDnc3 | YPDnc4 | EtOHnc1 | EtOHnc2 | Galnc1 | Galnc2 |
| 13 PHM6   | YDR281C   | YPDcl2 | YPDcl3 | EtOHcl1 | EtOHcl2 | Galcl1 | YPDnc1 | YPDnc2 | YPDnc3 | YPDnc4 | EtOHnc1 | EtOHnc2 | Galnc1 | Galnc2 |
| 13 GPB1   | YOR371C   | YPDcl2 | YPDcl3 | EtOHcl1 | EtOHcl2 | Galcl1 | YPDnc1 | YPDnc2 | YPDnc3 | YPDnc4 | EtOHnc1 | EtOHnc2 | Galnc1 | Galnc2 |

|          |           |        |        |         |         |        |        |        |        |        |         |         |        |        |
|----------|-----------|--------|--------|---------|---------|--------|--------|--------|--------|--------|---------|---------|--------|--------|
| 13 APM4  | YOL062C   | YPDcl2 | YPDcl3 | EtOHcl1 | EtOHcl2 | Galcl1 | YPDnc1 | YPDnc2 | YPDnc3 | YPDnc4 | EtOHnc1 | EtOHnc2 | Galnc1 | Galnc2 |
| 13 NIT2  | YJL126W   | YPDcl2 | YPDcl3 | EtOHcl1 | EtOHcl2 | Galcl1 | YPDnc1 | YPDnc2 | YPDnc3 | YPDnc4 | EtOHnc1 | EtOHnc2 | Galnc1 | Galnc2 |
| 13 NSP1  | YJL041W   | YPDcl2 | YPDcl3 | EtOHcl1 | EtOHcl2 | Galcl1 | YPDnc1 | YPDnc2 | YPDnc3 | YPDnc4 | EtOHnc1 | EtOHnc2 | Galnc1 | Galnc2 |
| 13 SBH2  | YER019C-A | YPDcl2 | YPDcl3 | EtOHcl1 | EtOHcl2 | Galcl1 | YPDnc1 | YPDnc2 | YPDnc3 | YPDnc4 | EtOHnc1 | EtOHnc2 | Galnc1 | Galnc2 |
| 13 SMF1  | YOL122C   | YPDcl2 | YPDcl3 | EtOHcl1 | EtOHcl2 | Galcl1 | YPDnc1 | YPDnc2 | YPDnc3 | YPDnc4 | EtOHnc1 | EtOHnc2 | Galnc1 | Galnc2 |
| 13 OCH1  | YGL038C   | YPDcl2 | YPDcl3 | EtOHcl1 | EtOHcl2 | Galcl1 | YPDnc1 | YPDnc2 | YPDnc3 | YPDnc4 | EtOHnc1 | EtOHnc2 | Galnc1 | Galnc2 |
| 13 MYO1  | YHR023W   | YPDcl2 | YPDcl3 | EtOHcl1 | EtOHcl2 | Galcl1 | YPDnc1 | YPDnc2 | YPDnc3 | YPDnc4 | EtOHnc1 | EtOHnc2 | Galnc1 | Galnc2 |
| 13 TDH1  | YJL052W   | YPDcl2 | YPDcl3 | EtOHcl1 | EtOHcl2 | Galcl1 | YPDnc1 | YPDnc2 | YPDnc3 | YPDnc4 | EtOHnc1 | EtOHnc2 | Galnc1 | Galnc2 |
| 13 TFA2  | YKR062W   | YPDcl2 | YPDcl3 | EtOHcl1 | EtOHcl2 | Galcl1 | YPDnc1 | YPDnc2 | YPDnc3 | YPDnc4 | EtOHnc1 | EtOHnc2 | Galnc1 | Galnc2 |
| 13 MGA2  | YIR033W   | YPDcl2 | YPDcl3 | EtOHcl1 | EtOHcl2 | Galcl1 | YPDnc1 | YPDnc2 | YPDnc3 | YPDnc4 | EtOHnc1 | EtOHnc2 | Galnc1 | Galnc2 |
| 13 STR3  | YGL184C   | YPDcl2 | YPDcl3 | EtOHcl1 | EtOHcl2 | Galcl1 | YPDnc1 | YPDnc2 | YPDnc3 | YPDnc4 | EtOHnc1 | EtOHnc2 | Galnc1 | Galnc2 |
| 13 RMP1  | YLR145W   | YPDcl2 | YPDcl3 | EtOHcl1 | EtOHcl2 | Galcl1 | YPDnc1 | YPDnc2 | YPDnc3 | YPDnc4 | EtOHnc1 | EtOHnc2 | Galnc1 | Galnc2 |
| 13 HMI1  | YOL095C   | YPDcl2 | YPDcl3 | EtOHcl1 | EtOHcl2 | Galcl1 | YPDnc1 | YPDnc2 | YPDnc3 | YPDnc4 | EtOHnc1 | EtOHnc2 | Galnc1 | Galnc2 |
| 13 YET2  | YMR040W   | YPDcl2 | YPDcl3 | EtOHcl1 | EtOHcl2 | Galcl1 | YPDnc1 | YPDnc2 | YPDnc3 | YPDnc4 | EtOHnc1 | EtOHnc2 | Galnc1 | Galnc2 |
| 13 TYE7  | YOR344C   | YPDcl2 | YPDcl3 | EtOHcl1 | EtOHcl2 | Galcl1 | YPDnc1 | YPDnc2 | YPDnc3 | YPDnc4 | EtOHnc1 | EtOHnc2 | Galnc1 | Galnc2 |
| 13 ATP18 | YML081C-A | YPDcl2 | YPDcl3 | EtOHcl1 | EtOHcl2 | Galcl1 | YPDnc1 | YPDnc2 | YPDnc3 | YPDnc4 | EtOHnc1 | EtOHnc2 | Galnc1 | Galnc2 |
| 13 NIT3  | YLR351C   | YPDcl2 | YPDcl3 | EtOHcl1 | EtOHcl2 | Galcl1 | YPDnc1 | YPDnc2 | YPDnc3 | YPDnc4 | EtOHnc1 | EtOHnc2 | Galnc1 | Galnc2 |
| 13 GGC1  | YDL198C   | YPDcl2 | YPDcl3 | EtOHcl1 | EtOHcl2 | Galcl1 | YPDnc1 | YPDnc2 | YPDnc3 | YPDnc4 | EtOHnc1 | EtOHnc2 | Galnc1 | Galnc2 |
| 13 DRS2  | YAL026C   | YPDcl2 | YPDcl3 | EtOHcl1 | EtOHcl2 | Galcl1 | YPDnc1 | YPDnc2 | YPDnc3 | YPDnc4 | EtOHnc1 | EtOHnc2 | Galnc1 | Galnc2 |
| 13 FYV7  | YLR068W   | YPDcl2 | YPDcl3 | EtOHcl1 | EtOHcl2 | Galcl1 | YPDnc1 | YPDnc2 | YPDnc3 | YPDnc4 | EtOHnc1 | EtOHnc2 | Galnc1 | Galnc2 |
| 13       | YPL185W   | YPDcl2 | YPDcl3 | EtOHcl1 | EtOHcl2 | Galcl1 | YPDnc1 | YPDnc2 | YPDnc3 | YPDnc4 | EtOHnc1 | EtOHnc2 | Galnc1 | Galnc2 |
| 13 HTS1  | YPR033C   | YPDcl2 | YPDcl3 | EtOHcl1 | EtOHcl2 | Galcl1 | YPDnc1 | YPDnc2 | YPDnc3 | YPDnc4 | EtOHnc1 | EtOHnc2 | Galnc1 | Galnc2 |
| 13 ERO1  | YML130C   | YPDcl2 | YPDcl3 | EtOHcl1 | EtOHcl2 | Galcl1 | YPDnc1 | YPDnc2 | YPDnc3 | YPDnc4 | EtOHnc1 | EtOHnc2 | Galnc1 | Galnc2 |
| 13 PHO86 | YJL117W   | YPDcl2 | YPDcl3 | EtOHcl1 | EtOHcl2 | Galcl1 | YPDnc1 | YPDnc2 | YPDnc3 | YPDnc4 | EtOHnc1 | EtOHnc2 | Galnc1 | Galnc2 |
| 13       | YJR087W   | YPDcl2 | YPDcl3 | EtOHcl1 | EtOHcl2 | Galcl1 | YPDnc1 | YPDnc2 | YPDnc3 | YPDnc4 | EtOHnc1 | EtOHnc2 | Galnc1 | Galnc2 |
| 13 ARO80 | YDR421W   | YPDcl2 | YPDcl3 | EtOHcl1 | EtOHcl2 | Galcl1 | YPDnc1 | YPDnc2 | YPDnc3 | YPDnc4 | EtOHnc1 | EtOHnc2 | Galnc1 | Galnc2 |
| 13 GCV1  | YDR019C   | YPDcl2 | YPDcl3 | EtOHcl1 | EtOHcl2 | Galcl1 | YPDnc1 | YPDnc2 | YPDnc3 | YPDnc4 | EtOHnc1 | EtOHnc2 | Galnc1 | Galnc2 |
| 13 TFC7  | YOR110W   | YPDcl2 | YPDcl3 | EtOHcl1 | EtOHcl2 | Galcl1 | YPDnc1 | YPDnc2 | YPDnc3 | YPDnc4 | EtOHnc1 | EtOHnc2 | Galnc1 | Galnc2 |
| 13 WHI2  | YOR043W   | YPDcl2 | YPDcl3 | EtOHcl1 | EtOHcl2 | Galcl1 | YPDnc1 | YPDnc2 | YPDnc3 | YPDnc4 | EtOHnc1 | EtOHnc2 | Galnc1 | Galnc2 |
| 13 END3  | YNL084C   | YPDcl2 | YPDcl3 | EtOHcl1 | EtOHcl2 | Galcl1 | YPDnc1 | YPDnc2 | YPDnc3 | YPDnc4 | EtOHnc1 | EtOHnc2 | Galnc1 | Galnc2 |
| 13 TPI1  | YDR050C   | YPDcl2 | YPDcl3 | EtOHcl1 | EtOHcl2 | Galcl1 | YPDnc1 | YPDnc2 | YPDnc3 | YPDnc4 | EtOHnc1 | EtOHnc2 | Galnc1 | Galnc2 |
| 13 RPT5  | YOR117W   | YPDcl2 | YPDcl3 | EtOHcl1 | EtOHcl2 | Galcl1 | YPDnc1 | YPDnc2 | YPDnc3 | YPDnc4 | EtOHnc1 | EtOHnc2 | Galnc1 | Galnc2 |
| 13       | YOR072W   | YPDcl2 | YPDcl3 | EtOHcl1 | EtOHcl2 | Galcl1 | YPDnc1 | YPDnc2 | YPDnc3 | YPDnc4 | EtOHnc1 | EtOHnc2 | Galnc1 | Galnc2 |
| 13 PHD1  | YKL043W   | YPDcl2 | YPDcl3 | EtOHcl1 | EtOHcl2 | Galcl1 | YPDnc1 | YPDnc2 | YPDnc3 | YPDnc4 | EtOHnc1 | EtOHnc2 | Galnc1 | Galnc2 |

|           |         |        |        |         |         |        |        |        |        |        |         |         |        |        |
|-----------|---------|--------|--------|---------|---------|--------|--------|--------|--------|--------|---------|---------|--------|--------|
| 13 NMT1   | YLR195C | YPDcl2 | YPDcl3 | EtOHcl1 | EtOHcl2 | Galcl1 | YPDnc1 | YPDnc2 | YPDnc3 | YPDnc4 | EtOHnc1 | EtOHnc2 | Galnc1 | Galnc2 |
| 13 ITT1   | YML068W | YPDcl2 | YPDcl3 | EtOHcl1 | EtOHcl2 | Galcl1 | YPDnc1 | YPDnc2 | YPDnc3 | YPDnc4 | EtOHnc1 | EtOHnc2 | Galnc1 | Galnc2 |
| 13 CMK1   | YFR014C | YPDcl2 | YPDcl3 | EtOHcl1 | EtOHcl2 | Galcl1 | YPDnc1 | YPDnc2 | YPDnc3 | YPDnc4 | EtOHnc1 | EtOHnc2 | Galnc1 | Galnc2 |
| 13 IPK1   | YDR315C | YPDcl2 | YPDcl3 | EtOHcl1 | EtOHcl2 | Galcl1 | YPDnc1 | YPDnc2 | YPDnc3 | YPDnc4 | EtOHnc1 | EtOHnc2 | Galnc1 | Galnc2 |
| 13 MCH1   | YDL054C | YPDcl2 | YPDcl3 | EtOHcl1 | EtOHcl2 | Galcl1 | YPDnc1 | YPDnc2 | YPDnc3 | YPDnc4 | EtOHnc1 | EtOHnc2 | Galnc1 | Galnc2 |
| 13 RDS2   | YPL133C | YPDcl2 | YPDcl3 | EtOHcl1 | EtOHcl2 | Galcl1 | YPDnc1 | YPDnc2 | YPDnc3 | YPDnc4 | EtOHnc1 | EtOHnc2 | Galnc1 | Galnc2 |
| 13 GRS2   | YPR081C | YPDcl2 | YPDcl3 | EtOHcl1 | EtOHcl2 | Galcl1 | YPDnc1 | YPDnc2 | YPDnc3 | YPDnc4 | EtOHnc1 | EtOHnc2 | Galnc1 | Galnc2 |
| 13 IRC23  | YOR044W | YPDcl2 | YPDcl3 | EtOHcl1 | EtOHcl2 | Galcl1 | YPDnc1 | YPDnc2 | YPDnc3 | YPDnc4 | EtOHnc1 | EtOHnc2 | Galnc1 | Galnc2 |
| 13 DSE2   | YHR143W | YPDcl2 | YPDcl3 | EtOHcl1 | EtOHcl2 | Galcl1 | YPDnc1 | YPDnc2 | YPDnc3 | YPDnc4 | EtOHnc1 | EtOHnc2 | Galnc1 | Galnc2 |
| 13 AAD6   | YFL056C | YPDcl2 | YPDcl3 | EtOHcl1 | EtOHcl2 | Galcl1 | YPDnc1 | YPDnc2 | YPDnc3 | YPDnc4 | EtOHnc1 | EtOHnc2 | Galnc1 | Galnc2 |
| 13 VPS54  | YDR027C | YPDcl2 | YPDcl3 | EtOHcl1 | EtOHcl2 | Galcl1 | YPDnc1 | YPDnc2 | YPDnc3 | YPDnc4 | EtOHnc1 | EtOHnc2 | Galnc1 | Galnc2 |
| 13        | YHR035W | YPDcl2 | YPDcl3 | EtOHcl1 | EtOHcl2 | Galcl1 | YPDnc1 | YPDnc2 | YPDnc3 | YPDnc4 | EtOHnc1 | EtOHnc2 | Galnc1 | Galnc2 |
| 13        | YLR140W | YPDcl2 | YPDcl3 | EtOHcl1 | EtOHcl2 | Galcl1 | YPDnc1 | YPDnc2 | YPDnc3 | YPDnc4 | EtOHnc1 | EtOHnc2 | Galnc1 | Galnc2 |
| 13 GCD2   | YGR083C | YPDcl2 | YPDcl3 | EtOHcl1 | EtOHcl2 | Galcl1 | YPDnc1 | YPDnc2 | YPDnc3 | YPDnc4 | EtOHnc1 | EtOHnc2 | Galnc1 | Galnc2 |
| 13 TSR4   | YOL022C | YPDcl2 | YPDcl3 | EtOHcl1 | EtOHcl2 | Galcl1 | YPDnc1 | YPDnc2 | YPDnc3 | YPDnc4 | EtOHnc1 | EtOHnc2 | Galnc1 | Galnc2 |
| 13 LIF1   | YGL090W | YPDcl2 | YPDcl3 | EtOHcl1 | EtOHcl2 | Galcl1 | YPDnc1 | YPDnc2 | YPDnc3 | YPDnc4 | EtOHnc1 | EtOHnc2 | Galnc1 | Galnc2 |
| 13 UTR1   | YJR049C | YPDcl2 | YPDcl3 | EtOHcl1 | EtOHcl2 | Galcl1 | YPDnc1 | YPDnc2 | YPDnc3 | YPDnc4 | EtOHnc1 | EtOHnc2 | Galnc1 | Galnc2 |
| 13        | YJR071W | YPDcl2 | YPDcl3 | EtOHcl1 | EtOHcl2 | Galcl1 | YPDnc1 | YPDnc2 | YPDnc3 | YPDnc4 | EtOHnc1 | EtOHnc2 | Galnc1 | Galnc2 |
| 13 GYP7   | YDL234C | YPDcl2 | YPDcl3 | EtOHcl1 | EtOHcl2 | Galcl1 | YPDnc1 | YPDnc2 | YPDnc3 | YPDnc4 | EtOHnc1 | EtOHnc2 | Galnc1 | Galnc2 |
| 13 GIS3   | YLR094C | YPDcl2 | YPDcl3 | EtOHcl1 | EtOHcl2 | Galcl1 | YPDnc1 | YPDnc2 | YPDnc3 | YPDnc4 | EtOHnc1 | EtOHnc2 | Galnc1 | Galnc2 |
| 13 NGL3   | YML118W | YPDcl2 | YPDcl3 | EtOHcl1 | EtOHcl2 | Galcl1 | YPDnc1 | YPDnc2 | YPDnc3 | YPDnc4 | EtOHnc1 | EtOHnc2 | Galnc1 | Galnc2 |
| 13 RPL14B | YHL001W | YPDcl2 | YPDcl3 | EtOHcl1 | EtOHcl2 | Galcl1 | YPDnc1 | YPDnc2 | YPDnc3 | YPDnc4 | EtOHnc1 | EtOHnc2 | Galnc1 | Galnc2 |
| 13 YPR1   | YDR368W | YPDcl2 | YPDcl3 | EtOHcl1 | EtOHcl2 | Galcl1 | YPDnc1 | YPDnc2 | YPDnc3 | YPDnc4 | EtOHnc1 | EtOHnc2 | Galnc1 | Galnc2 |
| 13        | YPR014C | YPDcl2 | YPDcl3 | EtOHcl1 | EtOHcl2 | Galcl1 | YPDnc1 | YPDnc2 | YPDnc3 | YPDnc4 | EtOHnc1 | EtOHnc2 | Galnc1 | Galnc2 |
| 13 RPC17  | YJL011C | YPDcl2 | YPDcl3 | EtOHcl1 | EtOHcl2 | Galcl1 | YPDnc1 | YPDnc2 | YPDnc3 | YPDnc4 | EtOHnc1 | EtOHnc2 | Galnc1 | Galnc2 |
| 13 MCT1   | YOR221C | YPDcl2 | YPDcl3 | EtOHcl1 | EtOHcl2 | Galcl1 | YPDnc1 | YPDnc2 | YPDnc3 | YPDnc4 | EtOHnc1 | EtOHnc2 | Galnc1 | Galnc2 |
| 13        | YKL177W | YPDcl2 | YPDcl3 | EtOHcl1 | EtOHcl2 | Galcl1 | YPDnc1 | YPDnc2 | YPDnc3 | YPDnc4 | EtOHnc1 | EtOHnc2 | Galnc1 | Galnc2 |
| 13 RFA1   | YAR007C | YPDcl2 | YPDcl3 | EtOHcl1 | EtOHcl2 | Galcl1 | YPDnc1 | YPDnc2 | YPDnc3 | YPDnc4 | EtOHnc1 | EtOHnc2 | Galnc1 | Galnc2 |
| 13 AML1   | YGR001C | YPDcl2 | YPDcl3 | EtOHcl1 | EtOHcl2 | Galcl1 | YPDnc1 | YPDnc2 | YPDnc3 | YPDnc4 | EtOHnc1 | EtOHnc2 | Galnc1 | Galnc2 |
| 13 SEC13  | YLR208W | YPDcl2 | YPDcl3 | EtOHcl1 | EtOHcl2 | Galcl1 | YPDnc1 | YPDnc2 | YPDnc3 | YPDnc4 | EtOHnc1 | EtOHnc2 | Galnc1 | Galnc2 |
| 13 POA1   | YBR022W | YPDcl2 | YPDcl3 | EtOHcl1 | EtOHcl2 | Galcl1 | YPDnc1 | YPDnc2 | YPDnc3 | YPDnc4 | EtOHnc1 | EtOHnc2 | Galnc1 | Galnc2 |
| 13 GNT1   | YOR320C | YPDcl2 | YPDcl3 | EtOHcl1 | EtOHcl2 | Galcl1 | YPDnc1 | YPDnc2 | YPDnc3 | YPDnc4 | EtOHnc1 | EtOHnc2 | Galnc1 | Galnc2 |
| 13 MAL13  | YGR288W | YPDcl2 | YPDcl3 | EtOHcl1 | EtOHcl2 | Galcl1 | YPDnc1 | YPDnc2 | YPDnc3 | YPDnc4 | EtOHnc1 | EtOHnc2 | Galnc1 | Galnc2 |
| 13        | YOR385W | YPDcl2 | YPDcl3 | EtOHcl1 | EtOHcl2 | Galcl1 | YPDnc1 | YPDnc2 | YPDnc3 | YPDnc4 | EtOHnc1 | EtOHnc2 | Galnc1 | Galnc2 |

|    |       |           |        |        |         |         |        |        |        |        |        |         |         |        |        |
|----|-------|-----------|--------|--------|---------|---------|--------|--------|--------|--------|--------|---------|---------|--------|--------|
| 13 | ADY3  | YDL239C   | YPDcl2 | YPDcl3 | EtOHcl1 | EtOHcl2 | Galcl1 | YPDnc1 | YPDnc2 | YPDnc3 | YPDnc4 | EtOHnc1 | EtOHnc2 | Galnc1 | Galnc2 |
| 13 | MTC5  | YDR128W   | YPDcl2 | YPDcl3 | EtOHcl1 | EtOHcl2 | Galcl1 | YPDnc1 | YPDnc2 | YPDnc3 | YPDnc4 | EtOHnc1 | EtOHnc2 | Galnc1 | Galnc2 |
| 13 | TUB1  | YML085C   | YPDcl2 | YPDcl3 | EtOHcl1 | EtOHcl2 | Galcl1 | YPDnc1 | YPDnc2 | YPDnc3 | YPDnc4 | EtOHnc1 | EtOHnc2 | Galnc1 | Galnc2 |
| 13 | OYE2  | YHR179W   | YPDcl2 | YPDcl3 | EtOHcl1 | EtOHcl2 | Galcl1 | YPDnc1 | YPDnc2 | YPDnc3 | YPDnc4 | EtOHnc1 | EtOHnc2 | Galnc1 | Galnc2 |
| 13 | SPC24 | YMR117C   | YPDcl2 | YPDcl3 | EtOHcl1 | EtOHcl2 | Galcl1 | YPDnc1 | YPDnc2 | YPDnc3 | YPDnc4 | EtOHnc1 | EtOHnc2 | Galnc1 | Galnc2 |
| 13 | DPB2  | YPR175W   | YPDcl2 | YPDcl3 | EtOHcl1 | EtOHcl2 | Galcl1 | YPDnc1 | YPDnc2 | YPDnc3 | YPDnc4 | EtOHnc1 | EtOHnc2 | Galnc1 | Galnc2 |
| 13 | SEC2  | YNL272C   | YPDcl2 | YPDcl3 | EtOHcl1 | EtOHcl2 | Galcl1 | YPDnc1 | YPDnc2 | YPDnc3 | YPDnc4 | EtOHnc1 | EtOHnc2 | Galnc1 | Galnc2 |
| 13 |       | YJR038C   | YPDcl2 | YPDcl3 | EtOHcl1 | EtOHcl2 | Galcl1 | YPDnc1 | YPDnc2 | YPDnc3 | YPDnc4 | EtOHnc1 | EtOHnc2 | Galnc1 | Galnc2 |
| 13 | RPO31 | YOR116C   | YPDcl2 | YPDcl3 | EtOHcl1 | EtOHcl2 | Galcl1 | YPDnc1 | YPDnc2 | YPDnc3 | YPDnc4 | EtOHnc1 | EtOHnc2 | Galnc1 | Galnc2 |
| 13 | MBR1  | YKL093W   | YPDcl2 | YPDcl3 | EtOHcl1 | EtOHcl2 | Galcl1 | YPDnc1 | YPDnc2 | YPDnc3 | YPDnc4 | EtOHnc1 | EtOHnc2 | Galnc1 | Galnc2 |
| 13 | UFO1  | YML088W   | YPDcl2 | YPDcl3 | EtOHcl1 | EtOHcl2 | Galcl1 | YPDnc1 | YPDnc2 | YPDnc3 | YPDnc4 | EtOHnc1 | EtOHnc2 | Galnc1 | Galnc2 |
| 13 | SEC3  | YER008C   | YPDcl2 | YPDcl3 | EtOHcl1 | EtOHcl2 | Galcl1 | YPDnc1 | YPDnc2 | YPDnc3 | YPDnc4 | EtOHnc1 | EtOHnc2 | Galnc1 | Galnc2 |
| 13 | UBC5  | YDR059C   | YPDcl2 | YPDcl3 | EtOHcl1 | EtOHcl2 | Galcl1 | YPDnc1 | YPDnc2 | YPDnc3 | YPDnc4 | EtOHnc1 | EtOHnc2 | Galnc1 | Galnc2 |
| 13 | ADY4  | YLR227C   | YPDcl2 | YPDcl3 | EtOHcl1 | EtOHcl2 | Galcl1 | YPDnc1 | YPDnc2 | YPDnc3 | YPDnc4 | EtOHnc1 | EtOHnc2 | Galnc1 | Galnc2 |
| 13 | TRM11 | YOL124C   | YPDcl2 | YPDcl3 | EtOHcl1 | EtOHcl2 | Galcl1 | YPDnc1 | YPDnc2 | YPDnc3 | YPDnc4 | EtOHnc1 | EtOHnc2 | Galnc1 | Galnc2 |
| 13 | COQ2  | YNR041C   | YPDcl2 | YPDcl3 | EtOHcl1 | EtOHcl2 | Galcl1 | YPDnc1 | YPDnc2 | YPDnc3 | YPDnc4 | EtOHnc1 | EtOHnc2 | Galnc1 | Galnc2 |
| 13 |       | YJL052C-A | YPDcl2 | YPDcl3 | EtOHcl1 | EtOHcl2 | Galcl1 | YPDnc1 | YPDnc2 | YPDnc3 | YPDnc4 | EtOHnc1 | EtOHnc2 | Galnc1 | Galnc2 |
| 13 | MNI1  | YIL110W   | YPDcl2 | YPDcl3 | EtOHcl1 | EtOHcl2 | Galcl1 | YPDnc1 | YPDnc2 | YPDnc3 | YPDnc4 | EtOHnc1 | EtOHnc2 | Galnc1 | Galnc2 |
| 13 | BDS1  | YOL164W   | YPDcl2 | YPDcl3 | EtOHcl1 | EtOHcl2 | Galcl1 | YPDnc1 | YPDnc2 | YPDnc3 | YPDnc4 | EtOHnc1 | EtOHnc2 | Galnc1 | Galnc2 |
| 13 | YCS4  | YLR272C   | YPDcl2 | YPDcl3 | EtOHcl1 | EtOHcl2 | Galcl1 | YPDnc1 | YPDnc2 | YPDnc3 | YPDnc4 | EtOHnc1 | EtOHnc2 | Galnc1 | Galnc2 |
| 13 | DSF1  | YEL070W   | YPDcl2 | YPDcl3 | EtOHcl1 | EtOHcl2 | Galcl1 | YPDnc1 | YPDnc2 | YPDnc3 | YPDnc4 | EtOHnc1 | EtOHnc2 | Galnc1 | Galnc2 |
| 13 | RTA1  | YGR213C   | YPDcl2 | YPDcl3 | EtOHcl1 | EtOHcl2 | Galcl1 | YPDnc1 | YPDnc2 | YPDnc3 | YPDnc4 | EtOHnc1 | EtOHnc2 | Galnc1 | Galnc2 |
| 13 | HOS1  | YPR068C   | YPDcl2 | YPDcl3 | EtOHcl1 | EtOHcl2 | Galcl1 | YPDnc1 | YPDnc2 | YPDnc3 | YPDnc4 | EtOHnc1 | EtOHnc2 | Galnc1 | Galnc2 |
| 13 | PET20 | YPL159C   | YPDcl2 | YPDcl3 | EtOHcl1 | EtOHcl2 | Galcl1 | YPDnc1 | YPDnc2 | YPDnc3 | YPDnc4 | EtOHnc1 | EtOHnc2 | Galnc1 | Galnc2 |
| 13 | BCK2  | YER167W   | YPDcl2 | YPDcl3 | EtOHcl1 | EtOHcl2 | Galcl1 | YPDnc1 | YPDnc2 | YPDnc3 | YPDnc4 | EtOHnc1 | EtOHnc2 | Galnc1 | Galnc2 |
| 13 | IWR1  | YDL115C   | YPDcl2 | YPDcl3 | EtOHcl1 | EtOHcl2 | Galcl1 | YPDnc1 | YPDnc2 | YPDnc3 | YPDnc4 | EtOHnc1 | EtOHnc2 | Galnc1 | Galnc2 |
| 13 | ADH4  | YGL256W   | YPDcl2 | YPDcl3 | EtOHcl1 | EtOHcl2 | Galcl1 | YPDnc1 | YPDnc2 | YPDnc3 | YPDnc4 | EtOHnc1 | EtOHnc2 | Galnc1 | Galnc2 |
| 13 |       | YMR147W   | YPDcl2 | YPDcl3 | EtOHcl1 | EtOHcl2 | Galcl1 | YPDnc1 | YPDnc2 | YPDnc3 | YPDnc4 | EtOHnc1 | EtOHnc2 | Galnc1 | Galnc2 |
| 13 | RBS1  | YDL189W   | YPDcl2 | YPDcl3 | EtOHcl1 | EtOHcl2 | Galcl1 | YPDnc1 | YPDnc2 | YPDnc3 | YPDnc4 | EtOHnc1 | EtOHnc2 | Galnc1 | Galnc2 |
| 13 | FAS2  | YPL231W   | YPDcl2 | YPDcl3 | EtOHcl1 | EtOHcl2 | Galcl1 | YPDnc1 | YPDnc2 | YPDnc3 | YPDnc4 | EtOHnc1 | EtOHnc2 | Galnc1 | Galnc2 |
| 13 |       | YPR045C   | YPDcl2 | YPDcl3 | EtOHcl1 | EtOHcl2 | Galcl1 | YPDnc1 | YPDnc2 | YPDnc3 | YPDnc4 | EtOHnc1 | EtOHnc2 | Galnc1 | Galnc2 |
| 13 | PPX1  | YHR201C   | YPDcl2 | YPDcl3 | EtOHcl1 | EtOHcl2 | Galcl1 | YPDnc1 | YPDnc2 | YPDnc3 | YPDnc4 | EtOHnc1 | EtOHnc2 | Galnc1 | Galnc2 |
| 13 | ALG11 | YNL048W   | YPDcl2 | YPDcl3 | EtOHcl1 | EtOHcl2 | Galcl1 | YPDnc1 | YPDnc2 | YPDnc3 | YPDnc4 | EtOHnc1 | EtOHnc2 | Galnc1 | Galnc2 |
| 13 | APS2  | YJR058C   | YPDcl2 | YPDcl3 | EtOHcl1 | EtOHcl2 | Galcl1 | YPDnc1 | YPDnc2 | YPDnc3 | YPDnc4 | EtOHnc1 | EtOHnc2 | Galnc1 | Galnc2 |

|           |           |        |        |         |         |        |        |        |        |        |         |         |        |        |
|-----------|-----------|--------|--------|---------|---------|--------|--------|--------|--------|--------|---------|---------|--------|--------|
| 13 RPL8B  | YLL045C   | YPDcl2 | YPDcl3 | EtOHcl1 | EtOHcl2 | Galcl1 | YPDnc1 | YPDnc2 | YPDnc3 | YPDnc4 | EtOHnc1 | EtOHnc2 | Galnc1 | Galnc2 |
| 13 FAD1   | YDL045C   | YPDcl2 | YPDcl3 | EtOHcl1 | EtOHcl2 | Galcl1 | YPDnc1 | YPDnc2 | YPDnc3 | YPDnc4 | EtOHnc1 | EtOHnc2 | Galnc1 | Galnc2 |
| 13 UTP11  | YKL099C   | YPDcl2 | YPDcl3 | EtOHcl1 | EtOHcl2 | Galcl1 | YPDnc1 | YPDnc2 | YPDnc3 | YPDnc4 | EtOHnc1 | EtOHnc2 | Galnc1 | Galnc2 |
| 13 RRP1   | YDR087C   | YPDcl2 | YPDcl3 | EtOHcl1 | EtOHcl2 | Galcl1 | YPDnc1 | YPDnc2 | YPDnc3 | YPDnc4 | EtOHnc1 | EtOHnc2 | Galnc1 | Galnc2 |
| 13 ICL2   | YPR006C   | YPDcl2 | YPDcl3 | EtOHcl1 | EtOHcl2 | Galcl1 | YPDnc1 | YPDnc2 | YPDnc3 | YPDnc4 | EtOHnc1 | EtOHnc2 | Galnc1 | Galnc2 |
| 13 PMT4   | YJR143C   | YPDcl2 | YPDcl3 | EtOHcl1 | EtOHcl2 | Galcl1 | YPDnc1 | YPDnc2 | YPDnc3 | YPDnc4 | EtOHnc1 | EtOHnc2 | Galnc1 | Galnc2 |
| 13        | YMR001C-  | YPDcl2 | YPDcl3 | EtOHcl1 | EtOHcl2 | Galcl1 | YPDnc1 | YPDnc2 | YPDnc3 | YPDnc4 | EtOHnc1 | EtOHnc2 | Galnc1 | Galnc2 |
| 13 SRP72  | YPL210C   | YPDcl2 | YPDcl3 | EtOHcl1 | EtOHcl2 | Galcl1 | YPDnc1 | YPDnc2 | YPDnc3 | YPDnc4 | EtOHnc1 | EtOHnc2 | Galnc1 | Galnc2 |
| 13 NDT80  | YHR124W   | YPDcl2 | YPDcl3 | EtOHcl1 | EtOHcl2 | Galcl1 | YPDnc1 | YPDnc2 | YPDnc3 | YPDnc4 | EtOHnc1 | EtOHnc2 | Galnc1 | Galnc2 |
| 13        | YGR130C   | YPDcl2 | YPDcl3 | EtOHcl1 | EtOHcl2 | Galcl1 | YPDnc1 | YPDnc2 | YPDnc3 | YPDnc4 | EtOHnc1 | EtOHnc2 | Galnc1 | Galnc2 |
| 13 SNF6   | YHL025W   | YPDcl2 | YPDcl3 | EtOHcl1 | EtOHcl2 | Galcl1 | YPDnc1 | YPDnc2 | YPDnc3 | YPDnc4 | EtOHnc1 | EtOHnc2 | Galnc1 | Galnc2 |
| 13 SSA4   | YER103W   | YPDcl2 | YPDcl3 | EtOHcl1 | EtOHcl2 | Galcl1 | YPDnc1 | YPDnc2 | YPDnc3 | YPDnc4 | EtOHnc1 | EtOHnc2 | Galnc1 | Galnc2 |
| 13 SED4   | YCR067C   | YPDcl2 | YPDcl3 | EtOHcl1 | EtOHcl2 | Galcl1 | YPDnc1 | YPDnc2 | YPDnc3 | YPDnc4 | EtOHnc1 | EtOHnc2 | Galnc1 | Galnc2 |
| 13 TSC11  | YER093C   | YPDcl2 | YPDcl3 | EtOHcl1 | EtOHcl2 | Galcl1 | YPDnc1 | YPDnc2 | YPDnc3 | YPDnc4 | EtOHnc1 | EtOHnc2 | Galnc1 | Galnc2 |
| 13 MED7   | YOL135C   | YPDcl2 | YPDcl3 | EtOHcl1 | EtOHcl2 | Galcl1 | YPDnc1 | YPDnc2 | YPDnc3 | YPDnc4 | EtOHnc1 | EtOHnc2 | Galnc1 | Galnc2 |
| 13 RSC1   | YGR056W   | YPDcl2 | YPDcl3 | EtOHcl1 | EtOHcl2 | Galcl1 | YPDnc1 | YPDnc2 | YPDnc3 | YPDnc4 | EtOHnc1 | EtOHnc2 | Galnc1 | Galnc2 |
| 13        | YGR131W   | YPDcl2 | YPDcl3 | EtOHcl1 | EtOHcl2 | Galcl1 | YPDnc1 | YPDnc2 | YPDnc3 | YPDnc4 | EtOHnc1 | EtOHnc2 | Galnc1 | Galnc2 |
| 13 ADE2   | YOR128C   | YPDcl2 | YPDcl3 | EtOHcl1 | EtOHcl2 | Galcl1 | YPDnc1 | YPDnc2 | YPDnc3 | YPDnc4 | EtOHnc1 | EtOHnc2 | Galnc1 | Galnc2 |
| 13 ARP3   | YJR065C   | YPDcl2 | YPDcl3 | EtOHcl1 | EtOHcl2 | Galcl1 | YPDnc1 | YPDnc2 | YPDnc3 | YPDnc4 | EtOHnc1 | EtOHnc2 | Galnc1 | Galnc2 |
| 13 GET1   | YGL020C   | YPDcl2 | YPDcl3 | EtOHcl1 | EtOHcl2 | Galcl1 | YPDnc1 | YPDnc2 | YPDnc3 | YPDnc4 | EtOHnc1 | EtOHnc2 | Galnc1 | Galnc2 |
| 13        | YLR222C-A | YPDcl2 | YPDcl3 | EtOHcl1 | EtOHcl2 | Galcl1 | YPDnc1 | YPDnc2 | YPDnc3 | YPDnc4 | EtOHnc1 | EtOHnc2 | Galnc1 | Galnc2 |
| 13 PRP42  | YDR235W   | YPDcl2 | YPDcl3 | EtOHcl1 | EtOHcl2 | Galcl1 | YPDnc1 | YPDnc2 | YPDnc3 | YPDnc4 | EtOHnc1 | EtOHnc2 | Galnc1 | Galnc2 |
| 13 SOG2   | YOR353C   | YPDcl2 | YPDcl3 | EtOHcl1 | EtOHcl2 | Galcl1 | YPDnc1 | YPDnc2 | YPDnc3 | YPDnc4 | EtOHnc1 | EtOHnc2 | Galnc1 | Galnc2 |
| 13 CRN1   | YLR429W   | YPDcl2 | YPDcl3 | EtOHcl1 | EtOHcl2 | Galcl1 | YPDnc1 | YPDnc2 | YPDnc3 | YPDnc4 | EtOHnc1 | EtOHnc2 | Galnc1 | Galnc2 |
| 13        | YGL242C   | YPDcl2 | YPDcl3 | EtOHcl1 | EtOHcl2 | Galcl1 | YPDnc1 | YPDnc2 | YPDnc3 | YPDnc4 | EtOHnc1 | EtOHnc2 | Galnc1 | Galnc2 |
| 13        | YDR539W   | YPDcl2 | YPDcl3 | EtOHcl1 | EtOHcl2 | Galcl1 | YPDnc1 | YPDnc2 | YPDnc3 | YPDnc4 | EtOHnc1 | EtOHnc2 | Galnc1 | Galnc2 |
| 13 ELF1   | YKL160W   | YPDcl2 | YPDcl3 | EtOHcl1 | EtOHcl2 | Galcl1 | YPDnc1 | YPDnc2 | YPDnc3 | YPDnc4 | EtOHnc1 | EtOHnc2 | Galnc1 | Galnc2 |
| 13 UBP11  | YKR098C   | YPDcl2 | YPDcl3 | EtOHcl1 | EtOHcl2 | Galcl1 | YPDnc1 | YPDnc2 | YPDnc3 | YPDnc4 | EtOHnc1 | EtOHnc2 | Galnc1 | Galnc2 |
| 13 OSH7   | YHR001W   | YPDcl2 | YPDcl3 | EtOHcl1 | EtOHcl2 | Galcl1 | YPDnc1 | YPDnc2 | YPDnc3 | YPDnc4 | EtOHnc1 | EtOHnc2 | Galnc1 | Galnc2 |
| 13 CLB5   | YPR120C   | YPDcl2 | YPDcl3 | EtOHcl1 | EtOHcl2 | Galcl1 | YPDnc1 | YPDnc2 | YPDnc3 | YPDnc4 | EtOHnc1 | EtOHnc2 | Galnc1 | Galnc2 |
| 13 CIN5   | YOR028C   | YPDcl2 | YPDcl3 | EtOHcl1 | EtOHcl2 | Galcl1 | YPDnc1 | YPDnc2 | YPDnc3 | YPDnc4 | EtOHnc1 | EtOHnc2 | Galnc1 | Galnc2 |
| 13 SRY1   | YKL218C   | YPDcl2 | YPDcl3 | EtOHcl1 | EtOHcl2 | Galcl1 | YPDnc1 | YPDnc2 | YPDnc3 | YPDnc4 | EtOHnc1 | EtOHnc2 | Galnc1 | Galnc2 |
| 13        | YBL065W   | YPDcl2 | YPDcl3 | EtOHcl1 | EtOHcl2 | Galcl1 | YPDnc1 | YPDnc2 | YPDnc3 | YPDnc4 | EtOHnc1 | EtOHnc2 | Galnc1 | Galnc2 |
| 13 RPS11B | YBR048W   | YPDcl2 | YPDcl3 | EtOHcl1 | EtOHcl2 | Galcl1 | YPDnc1 | YPDnc2 | YPDnc3 | YPDnc4 | EtOHnc1 | EtOHnc2 | Galnc1 | Galnc2 |

|    |        |           |        |        |         |         |        |        |        |        |        |         |         |        |        |
|----|--------|-----------|--------|--------|---------|---------|--------|--------|--------|--------|--------|---------|---------|--------|--------|
| 13 | SUL1   | YBR294W   | YPDcl2 | YPDcl3 | EtOHcl1 | EtOHcl2 | Galcl1 | YPDnc1 | YPDnc2 | YPDnc3 | YPDnc4 | EtOHnc1 | EtOHnc2 | Galnc1 | Galnc2 |
| 13 |        | YLR407W   | YPDcl2 | YPDcl3 | EtOHcl1 | EtOHcl2 | Galcl1 | YPDnc1 | YPDnc2 | YPDnc3 | YPDnc4 | EtOHnc1 | EtOHnc2 | Galnc1 | Galnc2 |
| 13 |        | YIL068W-A | YPDcl2 | YPDcl3 | EtOHcl1 | EtOHcl2 | Galcl1 | YPDnc1 | YPDnc2 | YPDnc3 | YPDnc4 | EtOHnc1 | EtOHnc2 | Galnc1 | Galnc2 |
| 13 |        | YBR174C   | YPDcl2 | YPDcl3 | EtOHcl1 | EtOHcl2 | Galcl1 | YPDnc1 | YPDnc2 | YPDnc3 | YPDnc4 | EtOHnc1 | EtOHnc2 | Galnc1 | Galnc2 |
| 13 |        | YLR271W   | YPDcl2 | YPDcl3 | EtOHcl1 | EtOHcl2 | Galcl1 | YPDnc1 | YPDnc2 | YPDnc3 | YPDnc4 | EtOHnc1 | EtOHnc2 | Galnc1 | Galnc2 |
| 13 | PSD1   | YNL169C   | YPDcl2 | YPDcl3 | EtOHcl1 | EtOHcl2 | Galcl1 | YPDnc1 | YPDnc2 | YPDnc3 | YPDnc4 | EtOHnc1 | EtOHnc2 | Galnc1 | Galnc2 |
| 13 |        | YKL063C   | YPDcl2 | YPDcl3 | EtOHcl1 | EtOHcl2 | Galcl1 | YPDnc1 | YPDnc2 | YPDnc3 | YPDnc4 | EtOHnc1 | EtOHnc2 | Galnc1 | Galnc2 |
| 13 |        | YIL152W   | YPDcl2 | YPDcl3 | EtOHcl1 | EtOHcl2 | Galcl1 | YPDnc1 | YPDnc2 | YPDnc3 | YPDnc4 | EtOHnc1 | EtOHnc2 | Galnc1 | Galnc2 |
| 13 | UTP18  | YJL069C   | YPDcl2 | YPDcl3 | EtOHcl1 | EtOHcl2 | Galcl1 | YPDnc1 | YPDnc2 | YPDnc3 | YPDnc4 | EtOHnc1 | EtOHnc2 | Galnc1 | Galnc2 |
| 13 | GON7   | YJL184W   | YPDcl2 | YPDcl3 | EtOHcl1 | EtOHcl2 | Galcl1 | YPDnc1 | YPDnc2 | YPDnc3 | YPDnc4 | EtOHnc1 | EtOHnc2 | Galnc1 | Galnc2 |
| 13 | GCA1   | YPR115W   | YPDcl2 | YPDcl3 | EtOHcl1 | EtOHcl2 | Galcl1 | YPDnc1 | YPDnc2 | YPDnc3 | YPDnc4 | EtOHnc1 | EtOHnc2 | Galnc1 | Galnc2 |
| 13 | EAR1   | YMR171C   | YPDcl2 | YPDcl3 | EtOHcl1 | EtOHcl2 | Galcl1 | YPDnc1 | YPDnc2 | YPDnc3 | YPDnc4 | EtOHnc1 | EtOHnc2 | Galnc1 | Galnc2 |
| 13 | APA2   | YDR530C   | YPDcl2 | YPDcl3 | EtOHcl1 | EtOHcl2 | Galcl1 | YPDnc1 | YPDnc2 | YPDnc3 | YPDnc4 | EtOHnc1 | EtOHnc2 | Galnc1 | Galnc2 |
| 13 | SPC34  | YKR037C   | YPDcl2 | YPDcl3 | EtOHcl1 | EtOHcl2 | Galcl1 | YPDnc1 | YPDnc2 | YPDnc3 | YPDnc4 | EtOHnc1 | EtOHnc2 | Galnc1 | Galnc2 |
| 13 | ATP14  | YLR295C   | YPDcl2 | YPDcl3 | EtOHcl1 | EtOHcl2 | Galcl1 | YPDnc1 | YPDnc2 | YPDnc3 | YPDnc4 | EtOHnc1 | EtOHnc2 | Galnc1 | Galnc2 |
| 13 | KHA1   | YJL094C   | YPDcl2 | YPDcl3 | EtOHcl1 | EtOHcl2 | Galcl1 | YPDnc1 | YPDnc2 | YPDnc3 | YPDnc4 | EtOHnc1 | EtOHnc2 | Galnc1 | Galnc2 |
| 13 | SNU13  | YEL026W   | YPDcl2 | YPDcl3 | EtOHcl1 | EtOHcl2 | Galcl1 | YPDnc1 | YPDnc2 | YPDnc3 | YPDnc4 | EtOHnc1 | EtOHnc2 | Galnc1 | Galnc2 |
| 13 | MSS2   | YDL107W   | YPDcl2 | YPDcl3 | EtOHcl1 | EtOHcl2 | Galcl1 | YPDnc1 | YPDnc2 | YPDnc3 | YPDnc4 | EtOHnc1 | EtOHnc2 | Galnc1 | Galnc2 |
| 13 | MAK16  | YAL025C   | YPDcl2 | YPDcl3 | EtOHcl1 | EtOHcl2 | Galcl1 | YPDnc1 | YPDnc2 | YPDnc3 | YPDnc4 | EtOHnc1 | EtOHnc2 | Galnc1 | Galnc2 |
| 13 | PMT2   | YAL023C   | YPDcl2 | YPDcl3 | EtOHcl1 | EtOHcl2 | Galcl1 | YPDnc1 | YPDnc2 | YPDnc3 | YPDnc4 | EtOHnc1 | EtOHnc2 | Galnc1 | Galnc2 |
| 13 | PEX17  | YNL214W   | YPDcl2 | YPDcl3 | EtOHcl1 | EtOHcl2 | Galcl1 | YPDnc1 | YPDnc2 | YPDnc3 | YPDnc4 | EtOHnc1 | EtOHnc2 | Galnc1 | Galnc2 |
| 13 | ATG4   | YNL223W   | YPDcl2 | YPDcl3 | EtOHcl1 | EtOHcl2 | Galcl1 | YPDnc1 | YPDnc2 | YPDnc3 | YPDnc4 | EtOHnc1 | EtOHnc2 | Galnc1 | Galnc2 |
| 13 | RPL7A  | YGL076C   | YPDcl2 | YPDcl3 | EtOHcl1 | EtOHcl2 | Galcl1 | YPDnc1 | YPDnc2 | YPDnc3 | YPDnc4 | EtOHnc1 | EtOHnc2 | Galnc1 | Galnc2 |
| 13 |        | YIL100W   | YPDcl2 | YPDcl3 | EtOHcl1 | EtOHcl2 | Galcl1 | YPDnc1 | YPDnc2 | YPDnc3 | YPDnc4 | EtOHnc1 | EtOHnc2 | Galnc1 | Galnc2 |
| 13 | CNE1   | YAL058W   | YPDcl2 | YPDcl3 | EtOHcl1 | EtOHcl2 | Galcl1 | YPDnc1 | YPDnc2 | YPDnc3 | YPDnc4 | EtOHnc1 | EtOHnc2 | Galnc1 | Galnc2 |
| 13 | MRPL40 | YPL173W   | YPDcl2 | YPDcl3 | EtOHcl1 | EtOHcl2 | Galcl1 | YPDnc1 | YPDnc2 | YPDnc3 | YPDnc4 | EtOHnc1 | EtOHnc2 | Galnc1 | Galnc2 |
| 13 | PGU1   | YJR153W   | YPDcl2 | YPDcl3 | EtOHcl1 | EtOHcl2 | Galcl1 | YPDnc1 | YPDnc2 | YPDnc3 | YPDnc4 | EtOHnc1 | EtOHnc2 | Galnc1 | Galnc2 |
| 13 | ERV41  | YML067C   | YPDcl2 | YPDcl3 | EtOHcl1 | EtOHcl2 | Galcl1 | YPDnc1 | YPDnc2 | YPDnc3 | YPDnc4 | EtOHnc1 | EtOHnc2 | Galnc1 | Galnc2 |
| 13 | GPM1   | YKL152C   | YPDcl2 | YPDcl3 | EtOHcl1 | EtOHcl2 | Galcl1 | YPDnc1 | YPDnc2 | YPDnc3 | YPDnc4 | EtOHnc1 | EtOHnc2 | Galnc1 | Galnc2 |
| 13 |        | YDR464C-A | YPDcl2 | YPDcl3 | EtOHcl1 | EtOHcl2 | Galcl1 | YPDnc1 | YPDnc2 | YPDnc3 | YPDnc4 | EtOHnc1 | EtOHnc2 | Galnc1 | Galnc2 |
| 13 | ABC1   | YGL119W   | YPDcl2 | YPDcl3 | EtOHcl1 | EtOHcl2 | Galcl1 | YPDnc1 | YPDnc2 | YPDnc3 | YPDnc4 | EtOHnc1 | EtOHnc2 | Galnc1 | Galnc2 |
| 13 | SIN4   | YNL236W   | YPDcl2 | YPDcl3 | EtOHcl1 | EtOHcl2 | Galcl1 | YPDnc1 | YPDnc2 | YPDnc3 | YPDnc4 | EtOHnc1 | EtOHnc2 | Galnc1 | Galnc2 |
| 13 | GIM4   | YEL003W   | YPDcl2 | YPDcl3 | EtOHcl1 | EtOHcl2 | Galcl1 | YPDnc1 | YPDnc2 | YPDnc3 | YPDnc4 | EtOHnc1 | EtOHnc2 | Galnc1 | Galnc2 |
| 13 | PHB1   | YGR132C   | YPDcl2 | YPDcl3 | EtOHcl1 | EtOHcl2 | Galcl1 | YPDnc1 | YPDnc2 | YPDnc3 | YPDnc4 | EtOHnc1 | EtOHnc2 | Galnc1 | Galnc2 |

|           |           |        |        |         |         |        |        |        |        |        |         |         |        |        |
|-----------|-----------|--------|--------|---------|---------|--------|--------|--------|--------|--------|---------|---------|--------|--------|
| 13        | YHR193C-A | YPDcl2 | YPDcl3 | EtOHcl1 | EtOHcl2 | Galcl1 | YPDnc1 | YPDnc2 | YPDnc3 | YPDnc4 | EtOHnc1 | EtOHnc2 | Galnc1 | Galnc2 |
| 13 MRT4   | YKL009W   | YPDcl2 | YPDcl3 | EtOHcl1 | EtOHcl2 | Galcl1 | YPDnc1 | YPDnc2 | YPDnc3 | YPDnc4 | EtOHnc1 | EtOHnc2 | Galnc1 | Galnc2 |
| 13 ATP2   | YJR121W   | YPDcl2 | YPDcl3 | EtOHcl1 | EtOHcl2 | Galcl1 | YPDnc1 | YPDnc2 | YPDnc3 | YPDnc4 | EtOHnc1 | EtOHnc2 | Galnc1 | Galnc2 |
| 13 ADE1   | YAR015W   | YPDcl2 | YPDcl3 | EtOHcl1 | EtOHcl2 | Galcl1 | YPDnc1 | YPDnc2 | YPDnc3 | YPDnc4 | EtOHnc1 | EtOHnc2 | Galnc1 | Galnc2 |
| 13 RRT7   | YLL030C   | YPDcl2 | YPDcl3 | EtOHcl1 | EtOHcl2 | Galcl1 | YPDnc1 | YPDnc2 | YPDnc3 | YPDnc4 | EtOHnc1 | EtOHnc2 | Galnc1 | Galnc2 |
| 13 NOP10  | YHR072W-  | YPDcl2 | YPDcl3 | EtOHcl1 | EtOHcl2 | Galcl1 | YPDnc1 | YPDnc2 | YPDnc3 | YPDnc4 | EtOHnc1 | EtOHnc2 | Galnc1 | Galnc2 |
| 13 MRPS28 | YDR337W   | YPDcl2 | YPDcl3 | EtOHcl1 | EtOHcl2 | Galcl1 | YPDnc1 | YPDnc2 | YPDnc3 | YPDnc4 | EtOHnc1 | EtOHnc2 | Galnc1 | Galnc2 |
| 13 CBF2   | YGR140W   | YPDcl2 | YPDcl3 | EtOHcl1 | EtOHcl2 | Galcl1 | YPDnc1 | YPDnc2 | YPDnc3 | YPDnc4 | EtOHnc1 | EtOHnc2 | Galnc1 | Galnc2 |
| 13 PGA2   | YNL149C   | YPDcl2 | YPDcl3 | EtOHcl1 | EtOHcl2 | Galcl1 | YPDnc1 | YPDnc2 | YPDnc3 | YPDnc4 | EtOHnc1 | EtOHnc2 | Galnc1 | Galnc2 |
| 13 HOM2   | YDR158W   | YPDcl2 | YPDcl3 | EtOHcl1 | EtOHcl2 | Galcl1 | YPDnc1 | YPDnc2 | YPDnc3 | YPDnc4 | EtOHnc1 | EtOHnc2 | Galnc1 | Galnc2 |
| 13 APT1   | YML022W   | YPDcl2 | YPDcl3 | EtOHcl1 | EtOHcl2 | Galcl1 | YPDnc1 | YPDnc2 | YPDnc3 | YPDnc4 | EtOHnc1 | EtOHnc2 | Galnc1 | Galnc2 |
| 13 SMC4   | YLR086W   | YPDcl2 | YPDcl3 | EtOHcl1 | EtOHcl2 | Galcl1 | YPDnc1 | YPDnc2 | YPDnc3 | YPDnc4 | EtOHnc1 | EtOHnc2 | Galnc1 | Galnc2 |
| 13 TFP3   | YPL234C   | YPDcl2 | YPDcl3 | EtOHcl1 | EtOHcl2 | Galcl1 | YPDnc1 | YPDnc2 | YPDnc3 | YPDnc4 | EtOHnc1 | EtOHnc2 | Galnc1 | Galnc2 |
| 13 DEG1   | YFL001W   | YPDcl2 | YPDcl3 | EtOHcl1 | EtOHcl2 | Galcl1 | YPDnc1 | YPDnc2 | YPDnc3 | YPDnc4 | EtOHnc1 | EtOHnc2 | Galnc1 | Galnc2 |
| 13 MAC1   | YMR021C   | YPDcl2 | YPDcl3 | EtOHcl1 | EtOHcl2 | Galcl1 | YPDnc1 | YPDnc2 | YPDnc3 | YPDnc4 | EtOHnc1 | EtOHnc2 | Galnc1 | Galnc2 |
| 13 STU1   | YBL034C   | YPDcl2 | YPDcl3 | EtOHcl1 | EtOHcl2 | Galcl1 | YPDnc1 | YPDnc2 | YPDnc3 | YPDnc4 | EtOHnc1 | EtOHnc2 | Galnc1 | Galnc2 |
| 13        | YOR032W-  | YPDcl2 | YPDcl3 | EtOHcl1 | EtOHcl2 | Galcl1 | YPDnc1 | YPDnc2 | YPDnc3 | YPDnc4 | EtOHnc1 | EtOHnc2 | Galnc1 | Galnc2 |
| 13        | YIR007W   | YPDcl2 | YPDcl3 | EtOHcl1 | EtOHcl2 | Galcl1 | YPDnc1 | YPDnc2 | YPDnc3 | YPDnc4 | EtOHnc1 | EtOHnc2 | Galnc1 | Galnc2 |
| 13        | YDR003W-  | YPDcl2 | YPDcl3 | EtOHcl1 | EtOHcl2 | Galcl1 | YPDnc1 | YPDnc2 | YPDnc3 | YPDnc4 | EtOHnc1 | EtOHnc2 | Galnc1 | Galnc2 |
| 13 SMY1   | YKL079W   | YPDcl2 | YPDcl3 | EtOHcl1 | EtOHcl2 | Galcl1 | YPDnc1 | YPDnc2 | YPDnc3 | YPDnc4 | EtOHnc1 | EtOHnc2 | Galnc1 | Galnc2 |
| 13 BPT1   | YLL015W   | YPDcl2 | YPDcl3 | EtOHcl1 | EtOHcl2 | Galcl1 | YPDnc1 | YPDnc2 | YPDnc3 | YPDnc4 | EtOHnc1 | EtOHnc2 | Galnc1 | Galnc2 |
| 13 MCR1   | YKL150W   | YPDcl2 | YPDcl3 | EtOHcl1 | EtOHcl2 | Galcl1 | YPDnc1 | YPDnc2 | YPDnc3 | YPDnc4 | EtOHnc1 | EtOHnc2 | Galnc1 | Galnc2 |
| 13 SIR4   | YDR227W   | YPDcl2 | YPDcl3 | EtOHcl1 | EtOHcl2 | Galcl1 | YPDnc1 | YPDnc2 | YPDnc3 | YPDnc4 | EtOHnc1 | EtOHnc2 | Galnc1 | Galnc2 |
| 13 SSS1   | YDR086C   | YPDcl2 | YPDcl3 | EtOHcl1 | EtOHcl2 | Galcl1 | YPDnc1 | YPDnc2 | YPDnc3 | YPDnc4 | EtOHnc1 | EtOHnc2 | Galnc1 | Galnc2 |
| 13 CRD1   | YDL142C   | YPDcl2 | YPDcl3 | EtOHcl1 | EtOHcl2 | Galcl1 | YPDnc1 | YPDnc2 | YPDnc3 | YPDnc4 | EtOHnc1 | EtOHnc2 | Galnc1 | Galnc2 |
| 13 ASI2   | YNL159C   | YPDcl2 | YPDcl3 | EtOHcl1 | EtOHcl2 | Galcl1 | YPDnc1 | YPDnc2 | YPDnc3 | YPDnc4 | EtOHnc1 | EtOHnc2 | Galnc1 | Galnc2 |
| 13 MTC4   | YBR255W   | YPDcl2 | YPDcl3 | EtOHcl1 | EtOHcl2 | Galcl1 | YPDnc1 | YPDnc2 | YPDnc3 | YPDnc4 | EtOHnc1 | EtOHnc2 | Galnc1 | Galnc2 |
| 13 SPI1   | YER150W   | YPDcl2 | YPDcl3 | EtOHcl1 | EtOHcl2 | Galcl1 | YPDnc1 | YPDnc2 | YPDnc3 | YPDnc4 | EtOHnc1 | EtOHnc2 | Galnc1 | Galnc2 |
| 13 EBP2   | YKL172W   | YPDcl2 | YPDcl3 | EtOHcl1 | EtOHcl2 | Galcl1 | YPDnc1 | YPDnc2 | YPDnc3 | YPDnc4 | EtOHnc1 | EtOHnc2 | Galnc1 | Galnc2 |
| 13 RGD2   | YFL047W   | YPDcl2 | YPDcl3 | EtOHcl1 | EtOHcl2 | Galcl1 | YPDnc1 | YPDnc2 | YPDnc3 | YPDnc4 | EtOHnc1 | EtOHnc2 | Galnc1 | Galnc2 |
| 13        | YDR327W   | YPDcl2 | YPDcl3 | EtOHcl1 | EtOHcl2 | Galcl1 | YPDnc1 | YPDnc2 | YPDnc3 | YPDnc4 | EtOHnc1 | EtOHnc2 | Galnc1 | Galnc2 |
| 13        | YPL071C   | YPDcl2 | YPDcl3 | EtOHcl1 | EtOHcl2 | Galcl1 | YPDnc1 | YPDnc2 | YPDnc3 | YPDnc4 | EtOHnc1 | EtOHnc2 | Galnc1 | Galnc2 |
| 13 TAF13  | YML098W   | YPDcl2 | YPDcl3 | EtOHcl1 | EtOHcl2 | Galcl1 | YPDnc1 | YPDnc2 | YPDnc3 | YPDnc4 | EtOHnc1 | EtOHnc2 | Galnc1 | Galnc2 |
| 13 HYR1   | YIR037W   | YPDcl2 | YPDcl3 | EtOHcl1 | EtOHcl2 | Galcl1 | YPDnc1 | YPDnc2 | YPDnc3 | YPDnc4 | EtOHnc1 | EtOHnc2 | Galnc1 | Galnc2 |

|           |         |        |        |         |         |        |        |        |        |        |         |         |        |        |
|-----------|---------|--------|--------|---------|---------|--------|--------|--------|--------|--------|---------|---------|--------|--------|
| 13 TMS1   | YDR105C | YPDcl2 | YPDcl3 | EtOHcl1 | EtOHcl2 | Galcl1 | YPDnc1 | YPDnc2 | YPDnc3 | YPDnc4 | EtOHnc1 | EtOHnc2 | Galnc1 | Galnc2 |
| 13        | YLR050C | YPDcl2 | YPDcl3 | EtOHcl1 | EtOHcl2 | Galcl1 | YPDnc1 | YPDnc2 | YPDnc3 | YPDnc4 | EtOHnc1 | EtOHnc2 | Galnc1 | Galnc2 |
| 13 HPA2   | YPR193C | YPDcl2 | YPDcl3 | EtOHcl1 | EtOHcl2 | Galcl1 | YPDnc1 | YPDnc2 | YPDnc3 | YPDnc4 | EtOHnc1 | EtOHnc2 | Galnc1 | Galnc2 |
| 13 MSS1   | YMR023C | YPDcl2 | YPDcl3 | EtOHcl1 | EtOHcl2 | Galcl1 | YPDnc1 | YPDnc2 | YPDnc3 | YPDnc4 | EtOHnc1 | EtOHnc2 | Galnc1 | Galnc2 |
| 13 RRN11  | YML043C | YPDcl2 | YPDcl3 | EtOHcl1 | EtOHcl2 | Galcl1 | YPDnc1 | YPDnc2 | YPDnc3 | YPDnc4 | EtOHnc1 | EtOHnc2 | Galnc1 | Galnc2 |
| 13 ASH1   | YKL185W | YPDcl2 | YPDcl3 | EtOHcl1 | EtOHcl2 | Galcl1 | YPDnc1 | YPDnc2 | YPDnc3 | YPDnc4 | EtOHnc1 | EtOHnc2 | Galnc1 | Galnc2 |
| 13 RPS29B | YDL061C | YPDcl2 | YPDcl3 | EtOHcl1 | EtOHcl2 | Galcl1 | YPDnc1 | YPDnc2 | YPDnc3 | YPDnc4 | EtOHnc1 | EtOHnc2 | Galnc1 | Galnc2 |
| 13 MET12  | YPL023C | YPDcl2 | YPDcl3 | EtOHcl1 | EtOHcl2 | Galcl1 | YPDnc1 | YPDnc2 | YPDnc3 | YPDnc4 | EtOHnc1 | EtOHnc2 | Galnc1 | Galnc2 |
| 13 SGO1   | YOR073W | YPDcl2 | YPDcl3 | EtOHcl1 | EtOHcl2 | Galcl1 | YPDnc1 | YPDnc2 | YPDnc3 | YPDnc4 | EtOHnc1 | EtOHnc2 | Galnc1 | Galnc2 |
| 13        | YDR026C | YPDcl2 | YPDcl3 | EtOHcl1 | EtOHcl2 | Galcl1 | YPDnc1 | YPDnc2 | YPDnc3 | YPDnc4 | EtOHnc1 | EtOHnc2 | Galnc1 | Galnc2 |
| 13 SWP1   | YMR149W | YPDcl2 | YPDcl3 | EtOHcl1 | EtOHcl2 | Galcl1 | YPDnc1 | YPDnc2 | YPDnc3 | YPDnc4 | EtOHnc1 | EtOHnc2 | Galnc1 | Galnc2 |
| 13 MRC1   | YCL061C | YPDcl2 | YPDcl3 | EtOHcl1 | EtOHcl2 | Galcl1 | YPDnc1 | YPDnc2 | YPDnc3 | YPDnc4 | EtOHnc1 | EtOHnc2 | Galnc1 | Galnc2 |
| 13        | YIL001W | YPDcl2 | YPDcl3 | EtOHcl1 | EtOHcl2 | Galcl1 | YPDnc1 | YPDnc2 | YPDnc3 | YPDnc4 | EtOHnc1 | EtOHnc2 | Galnc1 | Galnc2 |
| 13        | YDL027C | YPDcl2 | YPDcl3 | EtOHcl1 | EtOHcl2 | Galcl1 | YPDnc1 | YPDnc2 | YPDnc3 | YPDnc4 | EtOHnc1 | EtOHnc2 | Galnc1 | Galnc2 |
| 13 CRC1   | YOR100C | YPDcl2 | YPDcl3 | EtOHcl1 | EtOHcl2 | Galcl1 | YPDnc1 | YPDnc2 | YPDnc3 | YPDnc4 | EtOHnc1 | EtOHnc2 | Galnc1 | Galnc2 |
| 13 IRC24  | YIR036C | YPDcl2 | YPDcl3 | EtOHcl1 | EtOHcl2 | Galcl1 | YPDnc1 | YPDnc2 | YPDnc3 | YPDnc4 | EtOHnc1 | EtOHnc2 | Galnc1 | Galnc2 |
| 13        | YBL107C | YPDcl2 | YPDcl3 | EtOHcl1 | EtOHcl2 | Galcl1 | YPDnc1 | YPDnc2 | YPDnc3 | YPDnc4 | EtOHnc1 | EtOHnc2 | Galnc1 | Galnc2 |
| 13 RRT1   | YBL048W | YPDcl2 | YPDcl3 | EtOHcl1 | EtOHcl2 | Galcl1 | YPDnc1 | YPDnc2 | YPDnc3 | YPDnc4 | EtOHnc1 | EtOHnc2 | Galnc1 | Galnc2 |
| 13 MNL1   | YHR204W | YPDcl2 | YPDcl3 | EtOHcl1 | EtOHcl2 | Galcl1 | YPDnc1 | YPDnc2 | YPDnc3 | YPDnc4 | EtOHnc1 | EtOHnc2 | Galnc1 | Galnc2 |
| 13 ROG1   | YGL144C | YPDcl2 | YPDcl3 | EtOHcl1 | EtOHcl2 | Galcl1 | YPDnc1 | YPDnc2 | YPDnc3 | YPDnc4 | EtOHnc1 | EtOHnc2 | Galnc1 | Galnc2 |
| 13        | YFL042C | YPDcl2 | YPDcl3 | EtOHcl1 | EtOHcl2 | Galcl1 | YPDnc1 | YPDnc2 | YPDnc3 | YPDnc4 | EtOHnc1 | EtOHnc2 | Galnc1 | Galnc2 |
| 13 TOS6   | YNL300W | YPDcl2 | YPDcl3 | EtOHcl1 | EtOHcl2 | Galcl1 | YPDnc1 | YPDnc2 | YPDnc3 | YPDnc4 | EtOHnc1 | EtOHnc2 | Galnc1 | Galnc2 |
| 13 AIM44  | YPL158C | YPDcl2 | YPDcl3 | EtOHcl1 | EtOHcl2 | Galcl1 | YPDnc1 | YPDnc2 | YPDnc3 | YPDnc4 | EtOHnc1 | EtOHnc2 | Galnc1 | Galnc2 |
| 13        | YFR009W | YPDcl2 | YPDcl3 | EtOHcl1 | EtOHcl2 | Galcl1 | YPDnc1 | YPDnc2 | YPDnc3 | YPDnc4 | EtOHnc1 | EtOHnc2 | Galnc1 | Galnc2 |
| 13        | YKL105C | YPDcl2 | YPDcl3 | EtOHcl1 | EtOHcl2 | Galcl1 | YPDnc1 | YPDnc2 | YPDnc3 | YPDnc4 | EtOHnc1 | EtOHnc2 | Galnc1 | Galnc2 |
| 13 OAZ1   | YPL052W | YPDcl2 | YPDcl3 | EtOHcl1 | EtOHcl2 | Galcl1 | YPDnc1 | YPDnc2 | YPDnc3 | YPDnc4 | EtOHnc1 | EtOHnc2 | Galnc1 | Galnc2 |
| 13        | YBR241C | YPDcl2 | YPDcl3 | EtOHcl1 | EtOHcl2 | Galcl1 | YPDnc1 | YPDnc2 | YPDnc3 | YPDnc4 | EtOHnc1 | EtOHnc2 | Galnc1 | Galnc2 |
| 13 NUP116 | YMR047C | YPDcl2 | YPDcl3 | EtOHcl1 | EtOHcl2 | Galcl1 | YPDnc1 | YPDnc2 | YPDnc3 | YPDnc4 | EtOHnc1 | EtOHnc2 | Galnc1 | Galnc2 |
| 13        | YGR102C | YPDcl2 | YPDcl3 | EtOHcl1 | EtOHcl2 | Galcl1 | YPDnc1 | YPDnc2 | YPDnc3 | YPDnc4 | EtOHnc1 | EtOHnc2 | Galnc1 | Galnc2 |
| 13 RPS26B | YER131W | YPDcl2 | YPDcl3 | EtOHcl1 | EtOHcl2 | Galcl1 | YPDnc1 | YPDnc2 | YPDnc3 | YPDnc4 | EtOHnc1 | EtOHnc2 | Galnc1 | Galnc2 |
| 13 MSB3   | YNL293W | YPDcl2 | YPDcl3 | EtOHcl1 | EtOHcl2 | Galcl1 | YPDnc1 | YPDnc2 | YPDnc3 | YPDnc4 | EtOHnc1 | EtOHnc2 | Galnc1 | Galnc2 |
| 13 TRM112 | YNR046W | YPDcl2 | YPDcl3 | EtOHcl1 | EtOHcl2 | Galcl1 | YPDnc1 | YPDnc2 | YPDnc3 | YPDnc4 | EtOHnc1 | EtOHnc2 | Galnc1 | Galnc2 |
| 13 CDC3   | YLR314C | YPDcl2 | YPDcl3 | EtOHcl1 | EtOHcl2 | Galcl1 | YPDnc1 | YPDnc2 | YPDnc3 | YPDnc4 | EtOHnc1 | EtOHnc2 | Galnc1 | Galnc2 |
| 13 ARC19  | YKL013C | YPDcl2 | YPDcl3 | EtOHcl1 | EtOHcl2 | Galcl1 | YPDnc1 | YPDnc2 | YPDnc3 | YPDnc4 | EtOHnc1 | EtOHnc2 | Galnc1 | Galnc2 |



|    |        |           |        |        |         |         |        |        |        |        |        |         |         |        |        |
|----|--------|-----------|--------|--------|---------|---------|--------|--------|--------|--------|--------|---------|---------|--------|--------|
| 13 | PET122 | YER153C   | YPDcl2 | YPDcl3 | EtOHcl1 | EtOHcl2 | Galcl1 | YPDnc1 | YPDnc2 | YPDnc3 | YPDnc4 | EtOHnc1 | EtOHnc2 | Galnc1 | Galnc2 |
| 13 |        | YLL044W   | YPDcl2 | YPDcl3 | EtOHcl1 | EtOHcl2 | Galcl1 | YPDnc1 | YPDnc2 | YPDnc3 | YPDnc4 | EtOHnc1 | EtOHnc2 | Galnc1 | Galnc2 |
| 13 |        | YAR035C-A | YPDcl2 | YPDcl3 | EtOHcl1 | EtOHcl2 | Galcl1 | YPDnc1 | YPDnc2 | YPDnc3 | YPDnc4 | EtOHnc1 | EtOHnc2 | Galnc1 | Galnc2 |
| 13 | DBP9   | YLR276C   | YPDcl2 | YPDcl3 | EtOHcl1 | EtOHcl2 | Galcl1 | YPDnc1 | YPDnc2 | YPDnc3 | YPDnc4 | EtOHnc1 | EtOHnc2 | Galnc1 | Galnc2 |
| 13 | HOL1   | YNR055C   | YPDcl2 | YPDcl3 | EtOHcl1 | EtOHcl2 | Galcl1 | YPDnc1 | YPDnc2 | YPDnc3 | YPDnc4 | EtOHnc1 | EtOHnc2 | Galnc1 | Galnc2 |
| 13 | CLB3   | YDL155W   | YPDcl2 | YPDcl3 | EtOHcl1 | EtOHcl2 | Galcl1 | YPDnc1 | YPDnc2 | YPDnc3 | YPDnc4 | EtOHnc1 | EtOHnc2 | Galnc1 | Galnc2 |
| 13 | VPS28  | YPL065W   | YPDcl2 | YPDcl3 | EtOHcl1 | EtOHcl2 | Galcl1 | YPDnc1 | YPDnc2 | YPDnc3 | YPDnc4 | EtOHnc1 | EtOHnc2 | Galnc1 | Galnc2 |
| 13 | VMA21  | YGR105W   | YPDcl2 | YPDcl3 | EtOHcl1 | EtOHcl2 | Galcl1 | YPDnc1 | YPDnc2 | YPDnc3 | YPDnc4 | EtOHnc1 | EtOHnc2 | Galnc1 | Galnc2 |
| 13 | NUP82  | YJL061W   | YPDcl2 | YPDcl3 | EtOHcl1 | EtOHcl2 | Galcl1 | YPDnc1 | YPDnc2 | YPDnc3 | YPDnc4 | EtOHnc1 | EtOHnc2 | Galnc1 | Galnc2 |
| 13 | PCP1   | YGR101W   | YPDcl2 | YPDcl3 | EtOHcl1 | EtOHcl2 | Galcl1 | YPDnc1 | YPDnc2 | YPDnc3 | YPDnc4 | EtOHnc1 | EtOHnc2 | Galnc1 | Galnc2 |
| 13 | SPO1   | YNL012W   | YPDcl2 | YPDcl3 | EtOHcl1 | EtOHcl2 | Galcl1 | YPDnc1 | YPDnc2 | YPDnc3 | YPDnc4 | EtOHnc1 | EtOHnc2 | Galnc1 | Galnc2 |
| 13 | FAU1   | YER183C   | YPDcl2 | YPDcl3 | EtOHcl1 | EtOHcl2 | Galcl1 | YPDnc1 | YPDnc2 | YPDnc3 | YPDnc4 | EtOHnc1 | EtOHnc2 | Galnc1 | Galnc2 |
| 13 | SEN2   | YLR105C   | YPDcl2 | YPDcl3 | EtOHcl1 | EtOHcl2 | Galcl1 | YPDnc1 | YPDnc2 | YPDnc3 | YPDnc4 | EtOHnc1 | EtOHnc2 | Galnc1 | Galnc2 |
| 13 | CTK2   | YJL006C   | YPDcl2 | YPDcl3 | EtOHcl1 | EtOHcl2 | Galcl1 | YPDnc1 | YPDnc2 | YPDnc3 | YPDnc4 | EtOHnc1 | EtOHnc2 | Galnc1 | Galnc2 |
| 13 |        | YGR250C   | YPDcl2 | YPDcl3 | EtOHcl1 | EtOHcl2 | Galcl1 | YPDnc1 | YPDnc2 | YPDnc3 | YPDnc4 | EtOHnc1 | EtOHnc2 | Galnc1 | Galnc2 |
| 13 | ACN9   | YDR511W   | YPDcl2 | YPDcl3 | EtOHcl1 | EtOHcl2 | Galcl1 | YPDnc1 | YPDnc2 | YPDnc3 | YPDnc4 | EtOHnc1 | EtOHnc2 | Galnc1 | Galnc2 |
| 13 |        | YDL032W   | YPDcl2 | YPDcl3 | EtOHcl1 | EtOHcl2 | Galcl1 | YPDnc1 | YPDnc2 | YPDnc3 | YPDnc4 | EtOHnc1 | EtOHnc2 | Galnc1 | Galnc2 |
| 13 | NOG2   | YNR053C   | YPDcl2 | YPDcl3 | EtOHcl1 | EtOHcl2 | Galcl1 | YPDnc1 | YPDnc2 | YPDnc3 | YPDnc4 | EtOHnc1 | EtOHnc2 | Galnc1 | Galnc2 |
| 13 | BNA6   | YFR047C   | YPDcl2 | YPDcl3 | EtOHcl1 | EtOHcl2 | Galcl1 | YPDnc1 | YPDnc2 | YPDnc3 | YPDnc4 | EtOHnc1 | EtOHnc2 | Galnc1 | Galnc2 |
| 13 | PAT1   | YCR077C   | YPDcl2 | YPDcl3 | EtOHcl1 | EtOHcl2 | Galcl1 | YPDnc1 | YPDnc2 | YPDnc3 | YPDnc4 | EtOHnc1 | EtOHnc2 | Galnc1 | Galnc2 |
| 13 | RRI2   | YOL117W   | YPDcl2 | YPDcl3 | EtOHcl1 | EtOHcl2 | Galcl1 | YPDnc1 | YPDnc2 | YPDnc3 | YPDnc4 | EtOHnc1 | EtOHnc2 | Galnc1 | Galnc2 |
| 13 | CUE2   | YKL090W   | YPDcl2 | YPDcl3 | EtOHcl1 | EtOHcl2 | Galcl1 | YPDnc1 | YPDnc2 | YPDnc3 | YPDnc4 | EtOHnc1 | EtOHnc2 | Galnc1 | Galnc2 |
| 13 |        | YGL081W   | YPDcl2 | YPDcl3 | EtOHcl1 | EtOHcl2 | Galcl1 | YPDnc1 | YPDnc2 | YPDnc3 | YPDnc4 | EtOHnc1 | EtOHnc2 | Galnc1 | Galnc2 |
| 13 | MMP1   | YLL061W   | YPDcl2 | YPDcl3 | EtOHcl1 | EtOHcl2 | Galcl1 | YPDnc1 | YPDnc2 | YPDnc3 | YPDnc4 | EtOHnc1 | EtOHnc2 | Galnc1 | Galnc2 |
| 13 | ERG12  | YMR208W   | YPDcl2 | YPDcl3 | EtOHcl1 | EtOHcl2 | Galcl1 | YPDnc1 | YPDnc2 | YPDnc3 | YPDnc4 | EtOHnc1 | EtOHnc2 | Galnc1 | Galnc2 |
| 13 | HRD3   | YLR207W   | YPDcl2 | YPDcl3 | EtOHcl1 | EtOHcl2 | Galcl1 | YPDnc1 | YPDnc2 | YPDnc3 | YPDnc4 | EtOHnc1 | EtOHnc2 | Galnc1 | Galnc2 |
| 13 | ARE2   | YNR019W   | YPDcl2 | YPDcl3 | EtOHcl1 | EtOHcl2 | Galcl1 | YPDnc1 | YPDnc2 | YPDnc3 | YPDnc4 | EtOHnc1 | EtOHnc2 | Galnc1 | Galnc2 |
| 13 | RVB2   | YPL235W   | YPDcl2 | YPDcl3 | EtOHcl1 | EtOHcl2 | Galcl1 | YPDnc1 | YPDnc2 | YPDnc3 | YPDnc4 | EtOHnc1 | EtOHnc2 | Galnc1 | Galnc2 |
| 13 | MUD1   | YBR119W   | YPDcl2 | YPDcl3 | EtOHcl1 | EtOHcl2 | Galcl1 | YPDnc1 | YPDnc2 | YPDnc3 | YPDnc4 | EtOHnc1 | EtOHnc2 | Galnc1 | Galnc2 |
| 13 | WWM1   | YFL010C   | YPDcl2 | YPDcl3 | EtOHcl1 | EtOHcl2 | Galcl1 | YPDnc1 | YPDnc2 | YPDnc3 | YPDnc4 | EtOHnc1 | EtOHnc2 | Galnc1 | Galnc2 |
| 13 | ATG19  | YOL082W   | YPDcl2 | YPDcl3 | EtOHcl1 | EtOHcl2 | Galcl1 | YPDnc1 | YPDnc2 | YPDnc3 | YPDnc4 | EtOHnc1 | EtOHnc2 | Galnc1 | Galnc2 |
| 13 | SDC1   | YDR469W   | YPDcl2 | YPDcl3 | EtOHcl1 | EtOHcl2 | Galcl1 | YPDnc1 | YPDnc2 | YPDnc3 | YPDnc4 | EtOHnc1 | EtOHnc2 | Galnc1 | Galnc2 |
| 13 | SPO7   | YAL009W   | YPDcl2 | YPDcl3 | EtOHcl1 | EtOHcl2 | Galcl1 | YPDnc1 | YPDnc2 | YPDnc3 | YPDnc4 | EtOHnc1 | EtOHnc2 | Galnc1 | Galnc2 |
| 13 | YAE1   | YJR067C   | YPDcl2 | YPDcl3 | EtOHcl1 | EtOHcl2 | Galcl1 | YPDnc1 | YPDnc2 | YPDnc3 | YPDnc4 | EtOHnc1 | EtOHnc2 | Galnc1 | Galnc2 |

|    |       |           |        |        |         |         |        |        |        |        |        |         |         |        |        |
|----|-------|-----------|--------|--------|---------|---------|--------|--------|--------|--------|--------|---------|---------|--------|--------|
| 13 | NEW1  | YPL226W   | YPDcl2 | YPDcl3 | EtOHcl1 | EtOHcl2 | Galcl1 | YPDnc1 | YPDnc2 | YPDnc3 | YPDnc4 | EtOHnc1 | EtOHnc2 | Galnc1 | Galnc2 |
| 13 | DYN2  | YDR424C   | YPDcl2 | YPDcl3 | EtOHcl1 | EtOHcl2 | Galcl1 | YPDnc1 | YPDnc2 | YPDnc3 | YPDnc4 | EtOHnc1 | EtOHnc2 | Galnc1 | Galnc2 |
| 13 | NIC96 | YFR002W   | YPDcl2 | YPDcl3 | EtOHcl1 | EtOHcl2 | Galcl1 | YPDnc1 | YPDnc2 | YPDnc3 | YPDnc4 | EtOHnc1 | EtOHnc2 | Galnc1 | Galnc2 |
| 13 |       | YFR017C   | YPDcl2 | YPDcl3 | EtOHcl1 | EtOHcl2 | Galcl1 | YPDnc1 | YPDnc2 | YPDnc3 | YPDnc4 | EtOHnc1 | EtOHnc2 | Galnc1 | Galnc2 |
| 13 |       | YAR023C   | YPDcl2 | YPDcl3 | EtOHcl1 | EtOHcl2 | Galcl1 | YPDnc1 | YPDnc2 | YPDnc3 | YPDnc4 | EtOHnc1 | EtOHnc2 | Galnc1 | Galnc2 |
| 13 | CRP1  | YHR146W   | YPDcl2 | YPDcl3 | EtOHcl1 | EtOHcl2 | Galcl1 | YPDnc1 | YPDnc2 | YPDnc3 | YPDnc4 | EtOHnc1 | EtOHnc2 | Galnc1 | Galnc2 |
| 13 | TFB2  | YPL122C   | YPDcl2 | YPDcl3 | EtOHcl1 | EtOHcl2 | Galcl1 | YPDnc1 | YPDnc2 | YPDnc3 | YPDnc4 | EtOHnc1 | EtOHnc2 | Galnc1 | Galnc2 |
| 13 |       | YHL030W-  | YPDcl2 | YPDcl3 | EtOHcl1 | EtOHcl2 | Galcl1 | YPDnc1 | YPDnc2 | YPDnc3 | YPDnc4 | EtOHnc1 | EtOHnc2 | Galnc1 | Galnc2 |
| 13 |       | YPL222C-A | YPDcl2 | YPDcl3 | EtOHcl1 | EtOHcl2 | Galcl1 | YPDnc1 | YPDnc2 | YPDnc3 | YPDnc4 | EtOHnc1 | EtOHnc2 | Galnc1 | Galnc2 |
| 13 |       | YER186C   | YPDcl2 | YPDcl3 | EtOHcl1 | EtOHcl2 | Galcl1 | YPDnc1 | YPDnc2 | YPDnc3 | YPDnc4 | EtOHnc1 | EtOHnc2 | Galnc1 | Galnc2 |
| 13 | GPG1  | YGL121C   | YPDcl2 | YPDcl3 | EtOHcl1 | EtOHcl2 | Galcl1 | YPDnc1 | YPDnc2 | YPDnc3 | YPDnc4 | EtOHnc1 | EtOHnc2 | Galnc1 | Galnc2 |
| 13 | HIR2  | YOR038C   | YPDcl2 | YPDcl3 | EtOHcl1 | EtOHcl2 | Galcl1 | YPDnc1 | YPDnc2 | YPDnc3 | YPDnc4 | EtOHnc1 | EtOHnc2 | Galnc1 | Galnc2 |
| 13 | BUD23 | YCR047C   | YPDcl2 | YPDcl3 | EtOHcl1 | EtOHcl2 | Galcl1 | YPDnc1 | YPDnc2 | YPDnc3 | YPDnc4 | EtOHnc1 | EtOHnc2 | Galnc1 | Galnc2 |
| 13 | ESS1  | YJR017C   | YPDcl2 | YPDcl3 | EtOHcl1 | EtOHcl2 | Galcl1 | YPDnc1 | YPDnc2 | YPDnc3 | YPDnc4 | EtOHnc1 | EtOHnc2 | Galnc1 | Galnc2 |
| 13 | NAP1  | YKR048C   | YPDcl2 | YPDcl3 | EtOHcl1 | EtOHcl2 | Galcl1 | YPDnc1 | YPDnc2 | YPDnc3 | YPDnc4 | EtOHnc1 | EtOHnc2 | Galnc1 | Galnc2 |
| 13 | PIS1  | YPR113W   | YPDcl2 | YPDcl3 | EtOHcl1 | EtOHcl2 | Galcl1 | YPDnc1 | YPDnc2 | YPDnc3 | YPDnc4 | EtOHnc1 | EtOHnc2 | Galnc1 | Galnc2 |
| 13 |       | YOL085W-  | YPDcl2 | YPDcl3 | EtOHcl1 | EtOHcl2 | Galcl1 | YPDnc1 | YPDnc2 | YPDnc3 | YPDnc4 | EtOHnc1 | EtOHnc2 | Galnc1 | Galnc2 |
| 13 |       | YMR099C   | YPDcl2 | YPDcl3 | EtOHcl1 | EtOHcl2 | Galcl1 | YPDnc1 | YPDnc2 | YPDnc3 | YPDnc4 | EtOHnc1 | EtOHnc2 | Galnc1 | Galnc2 |
| 13 | COG2  | YGR120C   | YPDcl2 | YPDcl3 | EtOHcl1 | EtOHcl2 | Galcl1 | YPDnc1 | YPDnc2 | YPDnc3 | YPDnc4 | EtOHnc1 | EtOHnc2 | Galnc1 | Galnc2 |
| 13 | CAD1  | YDR423C   | YPDcl2 | YPDcl3 | EtOHcl1 | EtOHcl2 | Galcl1 | YPDnc1 | YPDnc2 | YPDnc3 | YPDnc4 | EtOHnc1 | EtOHnc2 | Galnc1 | Galnc2 |
| 13 | MMR1  | YLR190W   | YPDcl2 | YPDcl3 | EtOHcl1 | EtOHcl2 | Galcl1 | YPDnc1 | YPDnc2 | YPDnc3 | YPDnc4 | EtOHnc1 | EtOHnc2 | Galnc1 | Galnc2 |
| 13 | TAF3  | YPL011C   | YPDcl2 | YPDcl3 | EtOHcl1 | EtOHcl2 | Galcl1 | YPDnc1 | YPDnc2 | YPDnc3 | YPDnc4 | EtOHnc1 | EtOHnc2 | Galnc1 | Galnc2 |
| 13 | AMS1  | YGL156W   | YPDcl2 | YPDcl3 | EtOHcl1 | EtOHcl2 | Galcl1 | YPDnc1 | YPDnc2 | YPDnc3 | YPDnc4 | EtOHnc1 | EtOHnc2 | Galnc1 | Galnc2 |
| 13 | SAC1  | YKL212W   | YPDcl2 | YPDcl3 | EtOHcl1 | EtOHcl2 | Galcl1 | YPDnc1 | YPDnc2 | YPDnc3 | YPDnc4 | EtOHnc1 | EtOHnc2 | Galnc1 | Galnc2 |
| 13 | MOT1  | YPL082C   | YPDcl2 | YPDcl3 | EtOHcl1 | EtOHcl2 | Galcl1 | YPDnc1 | YPDnc2 | YPDnc3 | YPDnc4 | EtOHnc1 | EtOHnc2 | Galnc1 | Galnc2 |
| 13 | ECM29 | YHL030W   | YPDcl2 | YPDcl3 | EtOHcl1 | EtOHcl2 | Galcl1 | YPDnc1 | YPDnc2 | YPDnc3 | YPDnc4 | EtOHnc1 | EtOHnc2 | Galnc1 | Galnc2 |
| 13 | MIH1  | YMR036C   | YPDcl2 | YPDcl3 | EtOHcl1 | EtOHcl2 | Galcl1 | YPDnc1 | YPDnc2 | YPDnc3 | YPDnc4 | EtOHnc1 | EtOHnc2 | Galnc1 | Galnc2 |
| 13 |       | YDR352W   | YPDcl2 | YPDcl3 | EtOHcl1 | EtOHcl2 | Galcl1 | YPDnc1 | YPDnc2 | YPDnc3 | YPDnc4 | EtOHnc1 | EtOHnc2 | Galnc1 | Galnc2 |
| 13 |       | YCR025C   | YPDcl2 | YPDcl3 | EtOHcl1 | EtOHcl2 | Galcl1 | YPDnc1 | YPDnc2 | YPDnc3 | YPDnc4 | EtOHnc1 | EtOHnc2 | Galnc1 | Galnc2 |
| 13 | PTC5  | YOR090C   | YPDcl2 | YPDcl3 | EtOHcl1 | EtOHcl2 | Galcl1 | YPDnc1 | YPDnc2 | YPDnc3 | YPDnc4 | EtOHnc1 | EtOHnc2 | Galnc1 | Galnc2 |
| 13 | NPR1  | YNL183C   | YPDcl2 | YPDcl3 | EtOHcl1 | EtOHcl2 | Galcl1 | YPDnc1 | YPDnc2 | YPDnc3 | YPDnc4 | EtOHnc1 | EtOHnc2 | Galnc1 | Galnc2 |
| 13 | SIP1  | YDR422C   | YPDcl2 | YPDcl3 | EtOHcl1 | EtOHcl2 | Galcl1 | YPDnc1 | YPDnc2 | YPDnc3 | YPDnc4 | EtOHnc1 | EtOHnc2 | Galnc1 | Galnc2 |
| 13 | RIM1  | YCR028C-A | YPDcl2 | YPDcl3 | EtOHcl1 | EtOHcl2 | Galcl1 | YPDnc1 | YPDnc2 | YPDnc3 | YPDnc4 | EtOHnc1 | EtOHnc2 | Galnc1 | Galnc2 |
| 13 | MNT3  | YIL014W   | YPDcl2 | YPDcl3 | EtOHcl1 | EtOHcl2 | Galcl1 | YPDnc1 | YPDnc2 | YPDnc3 | YPDnc4 | EtOHnc1 | EtOHnc2 | Galnc1 | Galnc2 |

|    |        |          |        |        |         |         |        |        |        |        |        |         |         |        |        |
|----|--------|----------|--------|--------|---------|---------|--------|--------|--------|--------|--------|---------|---------|--------|--------|
| 13 | PEX30  | YLR324W  | YPDcl2 | YPDcl3 | EtOHcl1 | EtOHcl2 | Galcl1 | YPDnc1 | YPDnc2 | YPDnc3 | YPDnc4 | EtOHnc1 | EtOHnc2 | Galnc1 | Galnc2 |
| 13 | STE23  | YLR389C  | YPDcl2 | YPDcl3 | EtOHcl1 | EtOHcl2 | Galcl1 | YPDnc1 | YPDnc2 | YPDnc3 | YPDnc4 | EtOHnc1 | EtOHnc2 | Galnc1 | Galnc2 |
| 13 | YIF1   | YNL263C  | YPDcl2 | YPDcl3 | EtOHcl1 | EtOHcl2 | Galcl1 | YPDnc1 | YPDnc2 | YPDnc3 | YPDnc4 | EtOHnc1 | EtOHnc2 | Galnc1 | Galnc2 |
| 13 | CSR2   | YPR030W  | YPDcl2 | YPDcl3 | EtOHcl1 | EtOHcl2 | Galcl1 | YPDnc1 | YPDnc2 | YPDnc3 | YPDnc4 | EtOHnc1 | EtOHnc2 | Galnc1 | Galnc2 |
| 13 | SPO22  | YIL073C  | YPDcl2 | YPDcl3 | EtOHcl1 | EtOHcl2 | Galcl1 | YPDnc1 | YPDnc2 | YPDnc3 | YPDnc4 | EtOHnc1 | EtOHnc2 | Galnc1 | Galnc2 |
| 13 | SDH1   | YKL148C  | YPDcl2 | YPDcl3 | EtOHcl1 | EtOHcl2 | Galcl1 | YPDnc1 | YPDnc2 | YPDnc3 | YPDnc4 | EtOHnc1 | EtOHnc2 | Galnc1 | Galnc2 |
| 13 | TPN1   | YGL186C  | YPDcl2 | YPDcl3 | EtOHcl1 | EtOHcl2 | Galcl1 | YPDnc1 | YPDnc2 | YPDnc3 | YPDnc4 | EtOHnc1 | EtOHnc2 | Galnc1 | Galnc2 |
| 13 | RAD4   | YER162C  | YPDcl2 | YPDcl3 | EtOHcl1 | EtOHcl2 | Galcl1 | YPDnc1 | YPDnc2 | YPDnc3 | YPDnc4 | EtOHnc1 | EtOHnc2 | Galnc1 | Galnc2 |
| 13 | FIN1   | YDR130C  | YPDcl2 | YPDcl3 | EtOHcl1 | EtOHcl2 | Galcl1 | YPDnc1 | YPDnc2 | YPDnc3 | YPDnc4 | EtOHnc1 | EtOHnc2 | Galnc1 | Galnc2 |
| 13 | RCR1   | YBR005W  | YPDcl2 | YPDcl3 | EtOHcl1 | EtOHcl2 | Galcl1 | YPDnc1 | YPDnc2 | YPDnc3 | YPDnc4 | EtOHnc1 | EtOHnc2 | Galnc1 | Galnc2 |
| 13 | TOA2   | YKL058W  | YPDcl2 | YPDcl3 | EtOHcl1 | EtOHcl2 | Galcl1 | YPDnc1 | YPDnc2 | YPDnc3 | YPDnc4 | EtOHnc1 | EtOHnc2 | Galnc1 | Galnc2 |
| 13 |        | YAL019W- | YPDcl2 | YPDcl3 | EtOHcl1 | EtOHcl2 | Galcl1 | YPDnc1 | YPDnc2 | YPDnc3 | YPDnc4 | EtOHnc1 | EtOHnc2 | Galnc1 | Galnc2 |
| 13 | APL1   | YJR005W  | YPDcl2 | YPDcl3 | EtOHcl1 | EtOHcl2 | Galcl1 | YPDnc1 | YPDnc2 | YPDnc3 | YPDnc4 | EtOHnc1 | EtOHnc2 | Galnc1 | Galnc2 |
| 13 | EAF3   | YPR023C  | YPDcl2 | YPDcl3 | EtOHcl1 | EtOHcl2 | Galcl1 | YPDnc1 | YPDnc2 | YPDnc3 | YPDnc4 | EtOHnc1 | EtOHnc2 | Galnc1 | Galnc2 |
| 13 | POP8   | YBL018C  | YPDcl2 | YPDcl3 | EtOHcl1 | EtOHcl2 | Galcl1 | YPDnc1 | YPDnc2 | YPDnc3 | YPDnc4 | EtOHnc1 | EtOHnc2 | Galnc1 | Galnc2 |
| 13 | GUT2   | YIL155C  | YPDcl2 | YPDcl3 | EtOHcl1 | EtOHcl2 | Galcl1 | YPDnc1 | YPDnc2 | YPDnc3 | YPDnc4 | EtOHnc1 | EtOHnc2 | Galnc1 | Galnc2 |
| 13 | PMT3   | YOR321W  | YPDcl2 | YPDcl3 | EtOHcl1 | EtOHcl2 | Galcl1 | YPDnc1 | YPDnc2 | YPDnc3 | YPDnc4 | EtOHnc1 | EtOHnc2 | Galnc1 | Galnc2 |
| 13 | RPS4B  | YHR203C  | YPDcl2 | YPDcl3 | EtOHcl1 | EtOHcl2 | Galcl1 | YPDnc1 | YPDnc2 | YPDnc3 | YPDnc4 | EtOHnc1 | EtOHnc2 | Galnc1 | Galnc2 |
| 13 | TDA7   | YNL176C  | YPDcl2 | YPDcl3 | EtOHcl1 | EtOHcl2 | Galcl1 | YPDnc1 | YPDnc2 | YPDnc3 | YPDnc4 | EtOHnc1 | EtOHnc2 | Galnc1 | Galnc2 |
| 13 |        | YIL096C  | YPDcl2 | YPDcl3 | EtOHcl1 | EtOHcl2 | Galcl1 | YPDnc1 | YPDnc2 | YPDnc3 | YPDnc4 | EtOHnc1 | EtOHnc2 | Galnc1 | Galnc2 |
| 13 | TFC6   | YDR362C  | YPDcl2 | YPDcl3 | EtOHcl1 | EtOHcl2 | Galcl1 | YPDnc1 | YPDnc2 | YPDnc3 | YPDnc4 | EtOHnc1 | EtOHnc2 | Galnc1 | Galnc2 |
| 13 | SWE1   | YJL187C  | YPDcl2 | YPDcl3 | EtOHcl1 | EtOHcl2 | Galcl1 | YPDnc1 | YPDnc2 | YPDnc3 | YPDnc4 | EtOHnc1 | EtOHnc2 | Galnc1 | Galnc2 |
| 13 | PCT1   | YGR202C  | YPDcl2 | YPDcl3 | EtOHcl1 | EtOHcl2 | Galcl1 | YPDnc1 | YPDnc2 | YPDnc3 | YPDnc4 | EtOHnc1 | EtOHnc2 | Galnc1 | Galnc2 |
| 13 |        | YDR056C  | YPDcl2 | YPDcl3 | EtOHcl1 | EtOHcl2 | Galcl1 | YPDnc1 | YPDnc2 | YPDnc3 | YPDnc4 | EtOHnc1 | EtOHnc2 | Galnc1 | Galnc2 |
| 13 | OSH2   | YDL019C  | YPDcl2 | YPDcl3 | EtOHcl1 | EtOHcl2 | Galcl1 | YPDnc1 | YPDnc2 | YPDnc3 | YPDnc4 | EtOHnc1 | EtOHnc2 | Galnc1 | Galnc2 |
| 13 |        | YNL144W- | YPDcl2 | YPDcl3 | EtOHcl1 | EtOHcl2 | Galcl1 | YPDnc1 | YPDnc2 | YPDnc3 | YPDnc4 | EtOHnc1 | EtOHnc2 | Galnc1 | Galnc2 |
| 13 | MIM1   | YOL026C  | YPDcl2 | YPDcl3 | EtOHcl1 | EtOHcl2 | Galcl1 | YPDnc1 | YPDnc2 | YPDnc3 | YPDnc4 | EtOHnc1 | EtOHnc2 | Galnc1 | Galnc2 |
| 13 | RPS19A | YOL121C  | YPDcl2 | YPDcl3 | EtOHcl1 | EtOHcl2 | Galcl1 | YPDnc1 | YPDnc2 | YPDnc3 | YPDnc4 | EtOHnc1 | EtOHnc2 | Galnc1 | Galnc2 |
| 13 | GEP4   | YHR100C  | YPDcl2 | YPDcl3 | EtOHcl1 | EtOHcl2 | Galcl1 | YPDnc1 | YPDnc2 | YPDnc3 | YPDnc4 | EtOHnc1 | EtOHnc2 | Galnc1 | Galnc2 |
| 13 |        | YOR055W  | YPDcl2 | YPDcl3 | EtOHcl1 | EtOHcl2 | Galcl1 | YPDnc1 | YPDnc2 | YPDnc3 | YPDnc4 | EtOHnc1 | EtOHnc2 | Galnc1 | Galnc2 |
| 13 | MCM16  | YPR046W  | YPDcl2 | YPDcl3 | EtOHcl1 | EtOHcl2 | Galcl1 | YPDnc1 | YPDnc2 | YPDnc3 | YPDnc4 | EtOHnc1 | EtOHnc2 | Galnc1 | Galnc2 |
| 13 |        | YOR102W  | YPDcl2 | YPDcl3 | EtOHcl1 | EtOHcl2 | Galcl1 | YPDnc1 | YPDnc2 | YPDnc3 | YPDnc4 | EtOHnc1 | EtOHnc2 | Galnc1 | Galnc2 |
| 13 | VPS15  | YBR097W  | YPDcl2 | YPDcl3 | EtOHcl1 | EtOHcl2 | Galcl1 | YPDnc1 | YPDnc2 | YPDnc3 | YPDnc4 | EtOHnc1 | EtOHnc2 | Galnc1 | Galnc2 |
| 13 | CPR8   | YNR028W  | YPDcl2 | YPDcl3 | EtOHcl1 | EtOHcl2 | Galcl1 | YPDnc1 | YPDnc2 | YPDnc3 | YPDnc4 | EtOHnc1 | EtOHnc2 | Galnc1 | Galnc2 |

|          |           |        |        |         |         |        |        |        |        |        |         |         |        |        |
|----------|-----------|--------|--------|---------|---------|--------|--------|--------|--------|--------|---------|---------|--------|--------|
| 13 YHC1  | YLR298C   | YPDcl2 | YPDcl3 | EtOHcl1 | EtOHcl2 | Galcl1 | YPDnc1 | YPDnc2 | YPDnc3 | YPDnc4 | EtOHnc1 | EtOHnc2 | Galnc1 | Galnc2 |
| 13 AQY2  | YLL052C   | YPDcl2 | YPDcl3 | EtOHcl1 | EtOHcl2 | Galcl1 | YPDnc1 | YPDnc2 | YPDnc3 | YPDnc4 | EtOHnc1 | EtOHnc2 | Galnc1 | Galnc2 |
| 13       | YOL098C   | YPDcl2 | YPDcl3 | EtOHcl1 | EtOHcl2 | Galcl1 | YPDnc1 | YPDnc2 | YPDnc3 | YPDnc4 | EtOHnc1 | EtOHnc2 | Galnc1 | Galnc2 |
| 13 FSF1  | YOR271C   | YPDcl2 | YPDcl3 | EtOHcl1 | EtOHcl2 | Galcl1 | YPDnc1 | YPDnc2 | YPDnc3 | YPDnc4 | EtOHnc1 | EtOHnc2 | Galnc1 | Galnc2 |
| 13 SMP3  | YOR149C   | YPDcl2 | YPDcl3 | EtOHcl1 | EtOHcl2 | Galcl1 | YPDnc1 | YPDnc2 | YPDnc3 | YPDnc4 | EtOHnc1 | EtOHnc2 | Galnc1 | Galnc2 |
| 13 MMM1  | YLL006W   | YPDcl2 | YPDcl3 | EtOHcl1 | EtOHcl2 | Galcl1 | YPDnc1 | YPDnc2 | YPDnc3 | YPDnc4 | EtOHnc1 | EtOHnc2 | Galnc1 | Galnc2 |
| 13 SEC5  | YDR166C   | YPDcl2 | YPDcl3 | EtOHcl1 | EtOHcl2 | Galcl1 | YPDnc1 | YPDnc2 | YPDnc3 | YPDnc4 | EtOHnc1 | EtOHnc2 | Galnc1 | Galnc2 |
| 13       | YIL028W   | YPDcl2 | YPDcl3 | EtOHcl1 | EtOHcl2 | Galcl1 | YPDnc1 | YPDnc2 | YPDnc3 | YPDnc4 | EtOHnc1 | EtOHnc2 | Galnc1 | Galnc2 |
| 13 YFT2  | YDR319C   | YPDcl2 | YPDcl3 | EtOHcl1 | EtOHcl2 | Galcl1 | YPDnc1 | YPDnc2 | YPDnc3 | YPDnc4 | EtOHnc1 | EtOHnc2 | Galnc1 | Galnc2 |
| 13       | YKL133C   | YPDcl2 | YPDcl3 | EtOHcl1 | EtOHcl2 | Galcl1 | YPDnc1 | YPDnc2 | YPDnc3 | YPDnc4 | EtOHnc1 | EtOHnc2 | Galnc1 | Galnc2 |
| 13 NAM9  | YNL137C   | YPDcl2 | YPDcl3 | EtOHcl1 | EtOHcl2 | Galcl1 | YPDnc1 | YPDnc2 | YPDnc3 | YPDnc4 | EtOHnc1 | EtOHnc2 | Galnc1 | Galnc2 |
| 13 SNF3  | YDL194W   | YPDcl2 | YPDcl3 | EtOHcl1 | EtOHcl2 | Galcl1 | YPDnc1 | YPDnc2 | YPDnc3 | YPDnc4 | EtOHnc1 | EtOHnc2 | Galnc1 | Galnc2 |
| 13 YPT52 | YKR014C   | YPDcl2 | YPDcl3 | EtOHcl1 | EtOHcl2 | Galcl1 | YPDnc1 | YPDnc2 | YPDnc3 | YPDnc4 | EtOHnc1 | EtOHnc2 | Galnc1 | Galnc2 |
| 13       | YDL176W   | YPDcl2 | YPDcl3 | EtOHcl1 | EtOHcl2 | Galcl1 | YPDnc1 | YPDnc2 | YPDnc3 | YPDnc4 | EtOHnc1 | EtOHnc2 | Galnc1 | Galnc2 |
| 13 RIB3  | YDR487C   | YPDcl2 | YPDcl3 | EtOHcl1 | EtOHcl2 | Galcl1 | YPDnc1 | YPDnc2 | YPDnc3 | YPDnc4 | EtOHnc1 | EtOHnc2 | Galnc1 | Galnc2 |
| 13 LPX1  | YOR084W   | YPDcl2 | YPDcl3 | EtOHcl1 | EtOHcl2 | Galcl1 | YPDnc1 | YPDnc2 | YPDnc3 | YPDnc4 | EtOHnc1 | EtOHnc2 | Galnc1 | Galnc2 |
| 13 VHS2  | YIL135C   | YPDcl2 | YPDcl3 | EtOHcl1 | EtOHcl2 | Galcl1 | YPDnc1 | YPDnc2 | YPDnc3 | YPDnc4 | EtOHnc1 | EtOHnc2 | Galnc1 | Galnc2 |
| 13 PNP1  | YLR209C   | YPDcl2 | YPDcl3 | EtOHcl1 | EtOHcl2 | Galcl1 | YPDnc1 | YPDnc2 | YPDnc3 | YPDnc4 | EtOHnc1 | EtOHnc2 | Galnc1 | Galnc2 |
| 13 YOP1  | YPR028W   | YPDcl2 | YPDcl3 | EtOHcl1 | EtOHcl2 | Galcl1 | YPDnc1 | YPDnc2 | YPDnc3 | YPDnc4 | EtOHnc1 | EtOHnc2 | Galnc1 | Galnc2 |
| 13       | YIL115W-A | YPDcl2 | YPDcl3 | EtOHcl1 | EtOHcl2 | Galcl1 | YPDnc1 | YPDnc2 | YPDnc3 | YPDnc4 | EtOHnc1 | EtOHnc2 | Galnc1 | Galnc2 |
| 13 FKS1  | YLR342W   | YPDcl2 | YPDcl3 | EtOHcl1 | EtOHcl2 | Galcl1 | YPDnc1 | YPDnc2 | YPDnc3 | YPDnc4 | EtOHnc1 | EtOHnc2 | Galnc1 | Galnc2 |
| 13 NDL1  | YLR254C   | YPDcl2 | YPDcl3 | EtOHcl1 | EtOHcl2 | Galcl1 | YPDnc1 | YPDnc2 | YPDnc3 | YPDnc4 | EtOHnc1 | EtOHnc2 | Galnc1 | Galnc2 |
| 13 CSE4  | YKL049C   | YPDcl2 | YPDcl3 | EtOHcl1 | EtOHcl2 | Galcl1 | YPDnc1 | YPDnc2 | YPDnc3 | YPDnc4 | EtOHnc1 | EtOHnc2 | Galnc1 | Galnc2 |
| 13 CDC23 | YHR166C   | YPDcl2 | YPDcl3 | EtOHcl1 | EtOHcl2 | Galcl1 | YPDnc1 | YPDnc2 | YPDnc3 | YPDnc4 | EtOHnc1 | EtOHnc2 | Galnc1 | Galnc2 |
| 13 YSH1  | YLR277C   | YPDcl2 | YPDcl3 | EtOHcl1 | EtOHcl2 | Galcl1 | YPDnc1 | YPDnc2 | YPDnc3 | YPDnc4 | EtOHnc1 | EtOHnc2 | Galnc1 | Galnc2 |
| 13 RLM1  | YPL089C   | YPDcl2 | YPDcl3 | EtOHcl1 | EtOHcl2 | Galcl1 | YPDnc1 | YPDnc2 | YPDnc3 | YPDnc4 | EtOHnc1 | EtOHnc2 | Galnc1 | Galnc2 |
| 13 LST8  | YNL006W   | YPDcl2 | YPDcl3 | EtOHcl1 | EtOHcl2 | Galcl1 | YPDnc1 | YPDnc2 | YPDnc3 | YPDnc4 | EtOHnc1 | EtOHnc2 | Galnc1 | Galnc2 |
| 13 SKO1  | YNL167C   | YPDcl2 | YPDcl3 | EtOHcl1 | EtOHcl2 | Galcl1 | YPDnc1 | YPDnc2 | YPDnc3 | YPDnc4 | EtOHnc1 | EtOHnc2 | Galnc1 | Galnc2 |
| 13       | YGR203W   | YPDcl2 | YPDcl3 | EtOHcl1 | EtOHcl2 | Galcl1 | YPDnc1 | YPDnc2 | YPDnc3 | YPDnc4 | EtOHnc1 | EtOHnc2 | Galnc1 | Galnc2 |
| 13       | YJR005C-A | YPDcl2 | YPDcl3 | EtOHcl1 | EtOHcl2 | Galcl1 | YPDnc1 | YPDnc2 | YPDnc3 | YPDnc4 | EtOHnc1 | EtOHnc2 | Galnc1 | Galnc2 |
| 13 PDE1  | YGL248W   | YPDcl2 | YPDcl3 | EtOHcl1 | EtOHcl2 | Galcl1 | YPDnc1 | YPDnc2 | YPDnc3 | YPDnc4 | EtOHnc1 | EtOHnc2 | Galnc1 | Galnc2 |
| 13 SPO75 | YLL005C   | YPDcl2 | YPDcl3 | EtOHcl1 | EtOHcl2 | Galcl1 | YPDnc1 | YPDnc2 | YPDnc3 | YPDnc4 | EtOHnc1 | EtOHnc2 | Galnc1 | Galnc2 |
| 13 SHE10 | YGL228W   | YPDcl2 | YPDcl3 | EtOHcl1 | EtOHcl2 | Galcl1 | YPDnc1 | YPDnc2 | YPDnc3 | YPDnc4 | EtOHnc1 | EtOHnc2 | Galnc1 | Galnc2 |
| 13 ISU2  | YOR226C   | YPDcl2 | YPDcl3 | EtOHcl1 | EtOHcl2 | Galcl1 | YPDnc1 | YPDnc2 | YPDnc3 | YPDnc4 | EtOHnc1 | EtOHnc2 | Galnc1 | Galnc2 |

|    |        |           |        |        |         |         |        |        |        |        |        |         |         |        |        |
|----|--------|-----------|--------|--------|---------|---------|--------|--------|--------|--------|--------|---------|---------|--------|--------|
| 13 | ERG5   | YMR015C   | YPDcl2 | YPDcl3 | EtOHcl1 | EtOHcl2 | Galcl1 | YPDnc1 | YPDnc2 | YPDnc3 | YPDnc4 | EtOHnc1 | EtOHnc2 | Galnc1 | Galnc2 |
| 13 |        | YJL169W   | YPDcl2 | YPDcl3 | EtOHcl1 | EtOHcl2 | Galcl1 | YPDnc1 | YPDnc2 | YPDnc3 | YPDnc4 | EtOHnc1 | EtOHnc2 | Galnc1 | Galnc2 |
| 13 | CAK1   | YFL029C   | YPDcl2 | YPDcl3 | EtOHcl1 | EtOHcl2 | Galcl1 | YPDnc1 | YPDnc2 | YPDnc3 | YPDnc4 | EtOHnc1 | EtOHnc2 | Galnc1 | Galnc2 |
| 13 | PEX27  | YOR193W   | YPDcl2 | YPDcl3 | EtOHcl1 | EtOHcl2 | Galcl1 | YPDnc1 | YPDnc2 | YPDnc3 | YPDnc4 | EtOHnc1 | EtOHnc2 | Galnc1 | Galnc2 |
| 13 |        | YGL194C-A | YPDcl2 | YPDcl3 | EtOHcl1 | EtOHcl2 | Galcl1 | YPDnc1 | YPDnc2 | YPDnc3 | YPDnc4 | EtOHnc1 | EtOHnc2 | Galnc1 | Galnc2 |
| 13 |        | YKR075W-  | YPDcl2 | YPDcl3 | EtOHcl1 | EtOHcl2 | Galcl1 | YPDnc1 | YPDnc2 | YPDnc3 | YPDnc4 | EtOHnc1 | EtOHnc2 | Galnc1 | Galnc2 |
| 13 | IRC8   | YJL051W   | YPDcl2 | YPDcl3 | EtOHcl1 | EtOHcl2 | Galcl1 | YPDnc1 | YPDnc2 | YPDnc3 | YPDnc4 | EtOHnc1 | EtOHnc2 | Galnc1 | Galnc2 |
| 13 | ASF2   | YDL197C   | YPDcl2 | YPDcl3 | EtOHcl1 | EtOHcl2 | Galcl1 | YPDnc1 | YPDnc2 | YPDnc3 | YPDnc4 | EtOHnc1 | EtOHnc2 | Galnc1 | Galnc2 |
| 13 |        | YNL089C   | YPDcl2 | YPDcl3 | EtOHcl1 | EtOHcl2 | Galcl1 | YPDnc1 | YPDnc2 | YPDnc3 | YPDnc4 | EtOHnc1 | EtOHnc2 | Galnc1 | Galnc2 |
| 13 | ILV1   | YER086W   | YPDcl2 | YPDcl3 | EtOHcl1 | EtOHcl2 | Galcl1 | YPDnc1 | YPDnc2 | YPDnc3 | YPDnc4 | EtOHnc1 | EtOHnc2 | Galnc1 | Galnc2 |
| 13 | QCR7   | YDR529C   | YPDcl2 | YPDcl3 | EtOHcl1 | EtOHcl2 | Galcl1 | YPDnc1 | YPDnc2 | YPDnc3 | YPDnc4 | EtOHnc1 | EtOHnc2 | Galnc1 | Galnc2 |
| 13 | MSD1   | YPL104W   | YPDcl2 | YPDcl3 | EtOHcl1 | EtOHcl2 | Galcl1 | YPDnc1 | YPDnc2 | YPDnc3 | YPDnc4 | EtOHnc1 | EtOHnc2 | Galnc1 | Galnc2 |
| 13 |        | YDR018C   | YPDcl2 | YPDcl3 | EtOHcl1 | EtOHcl2 | Galcl1 | YPDnc1 | YPDnc2 | YPDnc3 | YPDnc4 | EtOHnc1 | EtOHnc2 | Galnc1 | Galnc2 |
| 13 | TAF7   | YMR227C   | YPDcl2 | YPDcl3 | EtOHcl1 | EtOHcl2 | Galcl1 | YPDnc1 | YPDnc2 | YPDnc3 | YPDnc4 | EtOHnc1 | EtOHnc2 | Galnc1 | Galnc2 |
| 13 | GPX1   | YKL026C   | YPDcl2 | YPDcl3 | EtOHcl1 | EtOHcl2 | Galcl1 | YPDnc1 | YPDnc2 | YPDnc3 | YPDnc4 | EtOHnc1 | EtOHnc2 | Galnc1 | Galnc2 |
| 13 | COG8   | YML071C   | YPDcl2 | YPDcl3 | EtOHcl1 | EtOHcl2 | Galcl1 | YPDnc1 | YPDnc2 | YPDnc3 | YPDnc4 | EtOHnc1 | EtOHnc2 | Galnc1 | Galnc2 |
| 13 |        | YOL097W-  | YPDcl2 | YPDcl3 | EtOHcl1 | EtOHcl2 | Galcl1 | YPDnc1 | YPDnc2 | YPDnc3 | YPDnc4 | EtOHnc1 | EtOHnc2 | Galnc1 | Galnc2 |
| 13 | TRS130 | YMR218C   | YPDcl2 | YPDcl3 | EtOHcl1 | EtOHcl2 | Galcl1 | YPDnc1 | YPDnc2 | YPDnc3 | YPDnc4 | EtOHnc1 | EtOHnc2 | Galnc1 | Galnc2 |
| 13 | GRE1   | YPL223C   | YPDcl2 | YPDcl3 | EtOHcl1 | EtOHcl2 | Galcl1 | YPDnc1 | YPDnc2 | YPDnc3 | YPDnc4 | EtOHnc1 | EtOHnc2 | Galnc1 | Galnc2 |
| 13 |        | YKL223W   | YPDcl2 | YPDcl3 | EtOHcl1 | EtOHcl2 | Galcl1 | YPDnc1 | YPDnc2 | YPDnc3 | YPDnc4 | EtOHnc1 | EtOHnc2 | Galnc1 | Galnc2 |
| 13 | TAN1   | YGL232W   | YPDcl2 | YPDcl3 | EtOHcl1 | EtOHcl2 | Galcl1 | YPDnc1 | YPDnc2 | YPDnc3 | YPDnc4 | EtOHnc1 | EtOHnc2 | Galnc1 | Galnc2 |
| 13 | SKI8   | YGL213C   | YPDcl2 | YPDcl3 | EtOHcl1 | EtOHcl2 | Galcl1 | YPDnc1 | YPDnc2 | YPDnc3 | YPDnc4 | EtOHnc1 | EtOHnc2 | Galnc1 | Galnc2 |
| 13 |        | YGL101W   | YPDcl2 | YPDcl3 | EtOHcl1 | EtOHcl2 | Galcl1 | YPDnc1 | YPDnc2 | YPDnc3 | YPDnc4 | EtOHnc1 | EtOHnc2 | Galnc1 | Galnc2 |
| 13 | HCS1   | YKL017C   | YPDcl2 | YPDcl3 | EtOHcl1 | EtOHcl2 | Galcl1 | YPDnc1 | YPDnc2 | YPDnc3 | YPDnc4 | EtOHnc1 | EtOHnc2 | Galnc1 | Galnc2 |
| 13 | SAL1   | YNL083W   | YPDcl2 | YPDcl3 | EtOHcl1 | EtOHcl2 | Galcl1 | YPDnc1 | YPDnc2 | YPDnc3 | YPDnc4 | EtOHnc1 | EtOHnc2 | Galnc1 | Galnc2 |
| 13 | ICS2   | YBR157C   | YPDcl2 | YPDcl3 | EtOHcl1 | EtOHcl2 | Galcl1 | YPDnc1 | YPDnc2 | YPDnc3 | YPDnc4 | EtOHnc1 | EtOHnc2 | Galnc1 | Galnc2 |
| 13 | RNA14  | YMR061W   | YPDcl2 | YPDcl3 | EtOHcl1 | EtOHcl2 | Galcl1 | YPDnc1 | YPDnc2 | YPDnc3 | YPDnc4 | EtOHnc1 | EtOHnc2 | Galnc1 | Galnc2 |
| 13 |        | YDR157W   | YPDcl2 | YPDcl3 | EtOHcl1 | EtOHcl2 | Galcl1 | YPDnc1 | YPDnc2 | YPDnc3 | YPDnc4 | EtOHnc1 | EtOHnc2 | Galnc1 | Galnc2 |
| 13 | RRP7   | YCL031C   | YPDcl2 | YPDcl3 | EtOHcl1 | EtOHcl2 | Galcl1 | YPDnc1 | YPDnc2 | YPDnc3 | YPDnc4 | EtOHnc1 | EtOHnc2 | Galnc1 | Galnc2 |
| 13 | YVH1   | YIR026C   | YPDcl2 | YPDcl3 | EtOHcl1 | EtOHcl2 | Galcl1 | YPDnc1 | YPDnc2 | YPDnc3 | YPDnc4 | EtOHnc1 | EtOHnc2 | Galnc1 | Galnc2 |
| 13 | NUT1   | YGL151W   | YPDcl2 | YPDcl3 | EtOHcl1 | EtOHcl2 | Galcl1 | YPDnc1 | YPDnc2 | YPDnc3 | YPDnc4 | EtOHnc1 | EtOHnc2 | Galnc1 | Galnc2 |
| 13 | VPS45  | YGL095C   | YPDcl2 | YPDcl3 | EtOHcl1 | EtOHcl2 | Galcl1 | YPDnc1 | YPDnc2 | YPDnc3 | YPDnc4 | EtOHnc1 | EtOHnc2 | Galnc1 | Galnc2 |
| 13 | PAC11  | YDR488C   | YPDcl2 | YPDcl3 | EtOHcl1 | EtOHcl2 | Galcl1 | YPDnc1 | YPDnc2 | YPDnc3 | YPDnc4 | EtOHnc1 | EtOHnc2 | Galnc1 | Galnc2 |
| 13 | JIP5   | YPR169W   | YPDcl2 | YPDcl3 | EtOHcl1 | EtOHcl2 | Galcl1 | YPDnc1 | YPDnc2 | YPDnc3 | YPDnc4 | EtOHnc1 | EtOHnc2 | Galnc1 | Galnc2 |

|           |           |        |        |         |         |        |        |        |        |        |         |         |        |        |
|-----------|-----------|--------|--------|---------|---------|--------|--------|--------|--------|--------|---------|---------|--------|--------|
| 13 APL5   | YPL195W   | YPDcl2 | YPDcl3 | EtOHcl1 | EtOHcl2 | Galcl1 | YPDnc1 | YPDnc2 | YPDnc3 | YPDnc4 | EtOHnc1 | EtOHnc2 | Galnc1 | Galnc2 |
| 13 SCS22  | YBL091C-A | YPDcl2 | YPDcl3 | EtOHcl1 | EtOHcl2 | Galcl1 | YPDnc1 | YPDnc2 | YPDnc3 | YPDnc4 | EtOHnc1 | EtOHnc2 | Galnc1 | Galnc2 |
| 13        | YPR010C-A | YPDcl2 | YPDcl3 | EtOHcl1 | EtOHcl2 | Galcl1 | YPDnc1 | YPDnc2 | YPDnc3 | YPDnc4 | EtOHnc1 | EtOHnc2 | Galnc1 | Galnc2 |
| 13 PAH1   | YMR165C   | YPDcl2 | YPDcl3 | EtOHcl1 | EtOHcl2 | Galcl1 | YPDnc1 | YPDnc2 | YPDnc3 | YPDnc4 | EtOHnc1 | EtOHnc2 | Galnc1 | Galnc2 |
| 13        | YGR015C   | YPDcl2 | YPDcl3 | EtOHcl1 | EtOHcl2 | Galcl1 | YPDnc1 | YPDnc2 | YPDnc3 | YPDnc4 | EtOHnc1 | EtOHnc2 | Galnc1 | Galnc2 |
| 13 MCM7   | YBR202W   | YPDcl2 | YPDcl3 | EtOHcl1 | EtOHcl2 | Galcl1 | YPDnc1 | YPDnc2 | YPDnc3 | YPDnc4 | EtOHnc1 | EtOHnc2 | Galnc1 | Galnc2 |
| 13 ASK1   | YKL052C   | YPDcl2 | YPDcl3 | EtOHcl1 | EtOHcl2 | Galcl1 | YPDnc1 | YPDnc2 | YPDnc3 | YPDnc4 | EtOHnc1 | EtOHnc2 | Galnc1 | Galnc2 |
| 13 APM1   | YPL259C   | YPDcl2 | YPDcl3 | EtOHcl1 | EtOHcl2 | Galcl1 | YPDnc1 | YPDnc2 | YPDnc3 | YPDnc4 | EtOHnc1 | EtOHnc2 | Galnc1 | Galnc2 |
| 13        | YIR020C   | YPDcl2 | YPDcl3 | EtOHcl1 | EtOHcl2 | Galcl1 | YPDnc1 | YPDnc2 | YPDnc3 | YPDnc4 | EtOHnc1 | EtOHnc2 | Galnc1 | Galnc2 |
| 13 EFR3   | YMR212C   | YPDcl2 | YPDcl3 | EtOHcl1 | EtOHcl2 | Galcl1 | YPDnc1 | YPDnc2 | YPDnc3 | YPDnc4 | EtOHnc1 | EtOHnc2 | Galnc1 | Galnc2 |
| 13 ALR2   | YFL050C   | YPDcl2 | YPDcl3 | EtOHcl1 | EtOHcl2 | Galcl1 | YPDnc1 | YPDnc2 | YPDnc3 | YPDnc4 | EtOHnc1 | EtOHnc2 | Galnc1 | Galnc2 |
| 13        | YER087C-A | YPDcl2 | YPDcl3 | EtOHcl1 | EtOHcl2 | Galcl1 | YPDnc1 | YPDnc2 | YPDnc3 | YPDnc4 | EtOHnc1 | EtOHnc2 | Galnc1 | Galnc2 |
| 13 TOF2   | YKR010C   | YPDcl2 | YPDcl3 | EtOHcl1 | EtOHcl2 | Galcl1 | YPDnc1 | YPDnc2 | YPDnc3 | YPDnc4 | EtOHnc1 | EtOHnc2 | Galnc1 | Galnc2 |
| 13 RPL6B  | YLR448W   | YPDcl2 | YPDcl3 | EtOHcl1 | EtOHcl2 | Galcl1 | YPDnc1 | YPDnc2 | YPDnc3 | YPDnc4 | EtOHnc1 | EtOHnc2 | Galnc1 | Galnc2 |
| 13 RET2   | YFR051C   | YPDcl2 | YPDcl3 | EtOHcl1 | EtOHcl2 | Galcl1 | YPDnc1 | YPDnc2 | YPDnc3 | YPDnc4 | EtOHnc1 | EtOHnc2 | Galnc1 | Galnc2 |
| 13 AYT1   | YLL063C   | YPDcl2 | YPDcl3 | EtOHcl1 | EtOHcl2 | Galcl1 | YPDnc1 | YPDnc2 | YPDnc3 | YPDnc4 | EtOHnc1 | EtOHnc2 | Galnc1 | Galnc2 |
| 13 SSL1   | YLR005W   | YPDcl2 | YPDcl3 | EtOHcl1 | EtOHcl2 | Galcl1 | YPDnc1 | YPDnc2 | YPDnc3 | YPDnc4 | EtOHnc1 | EtOHnc2 | Galnc1 | Galnc2 |
| 13 ATG3   | YNR007C   | YPDcl2 | YPDcl3 | EtOHcl1 | EtOHcl2 | Galcl1 | YPDnc1 | YPDnc2 | YPDnc3 | YPDnc4 | EtOHnc1 | EtOHnc2 | Galnc1 | Galnc2 |
| 13 IZH4   | YOL101C   | YPDcl2 | YPDcl3 | EtOHcl1 | EtOHcl2 | Galcl1 | YPDnc1 | YPDnc2 | YPDnc3 | YPDnc4 | EtOHnc1 | EtOHnc2 | Galnc1 | Galnc2 |
| 13 YAT2   | YER024W   | YPDcl2 | YPDcl3 | EtOHcl1 | EtOHcl2 | Galcl1 | YPDnc1 | YPDnc2 | YPDnc3 | YPDnc4 | EtOHnc1 | EtOHnc2 | Galnc1 | Galnc2 |
| 13 GPD1   | YDL022W   | YPDcl2 | YPDcl3 | EtOHcl1 | EtOHcl2 | Galcl1 | YPDnc1 | YPDnc2 | YPDnc3 | YPDnc4 | EtOHnc1 | EtOHnc2 | Galnc1 | Galnc2 |
| 13 MSE1   | YOL033W   | YPDcl2 | YPDcl3 | EtOHcl1 | EtOHcl2 | Galcl1 | YPDnc1 | YPDnc2 | YPDnc3 | YPDnc4 | EtOHnc1 | EtOHnc2 | Galnc1 | Galnc2 |
| 13 ENT3   | YJR125C   | YPDcl2 | YPDcl3 | EtOHcl1 | EtOHcl2 | Galcl1 | YPDnc1 | YPDnc2 | YPDnc3 | YPDnc4 | EtOHnc1 | EtOHnc2 | Galnc1 | Galnc2 |
| 13 GSY2   | YLR258W   | YPDcl2 | YPDcl3 | EtOHcl1 | EtOHcl2 | Galcl1 | YPDnc1 | YPDnc2 | YPDnc3 | YPDnc4 | EtOHnc1 | EtOHnc2 | Galnc1 | Galnc2 |
| 13 BOI1   | YBL085W   | YPDcl2 | YPDcl3 | EtOHcl1 | EtOHcl2 | Galcl1 | YPDnc1 | YPDnc2 | YPDnc3 | YPDnc4 | EtOHnc1 | EtOHnc2 | Galnc1 | Galnc2 |
| 13 HSH155 | YMR288W   | YPDcl2 | YPDcl3 | EtOHcl1 | EtOHcl2 | Galcl1 | YPDnc1 | YPDnc2 | YPDnc3 | YPDnc4 | EtOHnc1 | EtOHnc2 | Galnc1 | Galnc2 |
| 13 FMO1   | YHR176W   | YPDcl2 | YPDcl3 | EtOHcl1 | EtOHcl2 | Galcl1 | YPDnc1 | YPDnc2 | YPDnc3 | YPDnc4 | EtOHnc1 | EtOHnc2 | Galnc1 | Galnc2 |
| 13 SNC2   | YOR327C   | YPDcl2 | YPDcl3 | EtOHcl1 | EtOHcl2 | Galcl1 | YPDnc1 | YPDnc2 | YPDnc3 | YPDnc4 | EtOHnc1 | EtOHnc2 | Galnc1 | Galnc2 |
| 13 BUD17  | YNR027W   | YPDcl2 | YPDcl3 | EtOHcl1 | EtOHcl2 | Galcl1 | YPDnc1 | YPDnc2 | YPDnc3 | YPDnc4 | EtOHnc1 | EtOHnc2 | Galnc1 | Galnc2 |
| 13 TAH1   | YCR060W   | YPDcl2 | YPDcl3 | EtOHcl1 | EtOHcl2 | Galcl1 | YPDnc1 | YPDnc2 | YPDnc3 | YPDnc4 | EtOHnc1 | EtOHnc2 | Galnc1 | Galnc2 |
| 13 ZRT2   | YLR130C   | YPDcl2 | YPDcl3 | EtOHcl1 | EtOHcl2 | Galcl1 | YPDnc1 | YPDnc2 | YPDnc3 | YPDnc4 | EtOHnc1 | EtOHnc2 | Galnc1 | Galnc2 |
| 13 LYS4   | YDR234W   | YPDcl2 | YPDcl3 | EtOHcl1 | EtOHcl2 | Galcl1 | YPDnc1 | YPDnc2 | YPDnc3 | YPDnc4 | EtOHnc1 | EtOHnc2 | Galnc1 | Galnc2 |
| 13 GET4   | YOR164C   | YPDcl2 | YPDcl3 | EtOHcl1 | EtOHcl2 | Galcl1 | YPDnc1 | YPDnc2 | YPDnc3 | YPDnc4 | EtOHnc1 | EtOHnc2 | Galnc1 | Galnc2 |
| 13 GDH3   | YAL062W   | YPDcl2 | YPDcl3 | EtOHcl1 | EtOHcl2 | Galcl1 | YPDnc1 | YPDnc2 | YPDnc3 | YPDnc4 | EtOHnc1 | EtOHnc2 | Galnc1 | Galnc2 |

|          |          |        |        |         |         |        |        |        |        |        |         |         |        |        |
|----------|----------|--------|--------|---------|---------|--------|--------|--------|--------|--------|---------|---------|--------|--------|
| 13       | YOR376W- | YPDcl2 | YPDcl3 | EtOHcl1 | EtOHcl2 | Galcl1 | YPDnc1 | YPDnc2 | YPDnc3 | YPDnc4 | EtOHnc1 | EtOHnc2 | Galnc1 | Galnc2 |
| 13 RRN6  | YBL014C  | YPDcl2 | YPDcl3 | EtOHcl1 | EtOHcl2 | Galcl1 | YPDnc1 | YPDnc2 | YPDnc3 | YPDnc4 | EtOHnc1 | EtOHnc2 | Galnc1 | Galnc2 |
| 13 MAF1  | YDR005C  | YPDcl2 | YPDcl3 | EtOHcl1 | EtOHcl2 | Galcl1 | YPDnc1 | YPDnc2 | YPDnc3 | YPDnc4 | EtOHnc1 | EtOHnc2 | Galnc1 | Galnc2 |
| 13 AIM28 | YKR016W  | YPDcl2 | YPDcl3 | EtOHcl1 | EtOHcl2 | Galcl1 | YPDnc1 | YPDnc2 | YPDnc3 | YPDnc4 | EtOHnc1 | EtOHnc2 | Galnc1 | Galnc2 |
| 13       | YDL163W  | YPDcl2 | YPDcl3 | EtOHcl1 | EtOHcl2 | Galcl1 | YPDnc1 | YPDnc2 | YPDnc3 | YPDnc4 | EtOHnc1 | EtOHnc2 | Galnc1 | Galnc2 |
| 13 CWC25 | YNL245C  | YPDcl2 | YPDcl3 | EtOHcl1 | EtOHcl2 | Galcl1 | YPDnc1 | YPDnc2 | YPDnc3 | YPDnc4 | EtOHnc1 | EtOHnc2 | Galnc1 | Galnc2 |
| 13 CBP3  | YPL215W  | YPDcl2 | YPDcl3 | EtOHcl1 | EtOHcl2 | Galcl1 | YPDnc1 | YPDnc2 | YPDnc3 | YPDnc4 | EtOHnc1 | EtOHnc2 | Galnc1 | Galnc2 |
| 13 QNS1  | YHR074W  | YPDcl2 | YPDcl3 | EtOHcl1 | EtOHcl2 | Galcl1 | YPDnc1 | YPDnc2 | YPDnc3 | YPDnc4 | EtOHnc1 | EtOHnc2 | Galnc1 | Galnc2 |
| 13 DAL4  | YIR028W  | YPDcl2 | YPDcl3 | EtOHcl1 | EtOHcl2 | Galcl1 | YPDnc1 | YPDnc2 | YPDnc3 | YPDnc4 | EtOHnc1 | EtOHnc2 | Galnc1 | Galnc2 |
| 13       | YPR170C  | YPDcl2 | YPDcl3 | EtOHcl1 | EtOHcl2 | Galcl1 | YPDnc1 | YPDnc2 | YPDnc3 | YPDnc4 | EtOHnc1 | EtOHnc2 | Galnc1 | Galnc2 |
| 13 KRR1  | YCL059C  | YPDcl2 | YPDcl3 | EtOHcl1 | EtOHcl2 | Galcl1 | YPDnc1 | YPDnc2 | YPDnc3 | YPDnc4 | EtOHnc1 | EtOHnc2 | Galnc1 | Galnc2 |
| 13       | YAL037W  | YPDcl2 | YPDcl3 | EtOHcl1 | EtOHcl2 | Galcl1 | YPDnc1 | YPDnc2 | YPDnc3 | YPDnc4 | EtOHnc1 | EtOHnc2 | Galnc1 | Galnc2 |
| 13 PMI40 | YER003C  | YPDcl2 | YPDcl3 | EtOHcl1 | EtOHcl2 | Galcl1 | YPDnc1 | YPDnc2 | YPDnc3 | YPDnc4 | EtOHnc1 | EtOHnc2 | Galnc1 | Galnc2 |
| 13       | YJL119C  | YPDcl2 | YPDcl3 | EtOHcl1 | EtOHcl2 | Galcl1 | YPDnc1 | YPDnc2 | YPDnc3 | YPDnc4 | EtOHnc1 | EtOHnc2 | Galnc1 | Galnc2 |
| 13       | YOL050C  | YPDcl2 | YPDcl3 | EtOHcl1 | EtOHcl2 | Galcl1 | YPDnc1 | YPDnc2 | YPDnc3 | YPDnc4 | EtOHnc1 | EtOHnc2 | Galnc1 | Galnc2 |
| 13       | YMR085W  | YPDcl2 | YPDcl3 | EtOHcl1 | EtOHcl2 | Galcl1 | YPDnc1 | YPDnc2 | YPDnc3 | YPDnc4 | EtOHnc1 | EtOHnc2 | Galnc1 | Galnc2 |
| 13 LSB5  | YCL034W  | YPDcl2 | YPDcl3 | EtOHcl1 | EtOHcl2 | Galcl1 | YPDnc1 | YPDnc2 | YPDnc3 | YPDnc4 | EtOHnc1 | EtOHnc2 | Galnc1 | Galnc2 |
| 13 GPI16 | YHR188C  | YPDcl2 | YPDcl3 | EtOHcl1 | EtOHcl2 | Galcl1 | YPDnc1 | YPDnc2 | YPDnc3 | YPDnc4 | EtOHnc1 | EtOHnc2 | Galnc1 | Galnc2 |
| 13 REX4  | YOL080C  | YPDcl2 | YPDcl3 | EtOHcl1 | EtOHcl2 | Galcl1 | YPDnc1 | YPDnc2 | YPDnc3 | YPDnc4 | EtOHnc1 | EtOHnc2 | Galnc1 | Galnc2 |
| 13 LCP5  | YER127W  | YPDcl2 | YPDcl3 | EtOHcl1 | EtOHcl2 | Galcl1 | YPDnc1 | YPDnc2 | YPDnc3 | YPDnc4 | EtOHnc1 | EtOHnc2 | Galnc1 | Galnc2 |
| 13 GRR1  | YJR090C  | YPDcl2 | YPDcl3 | EtOHcl1 | EtOHcl2 | Galcl1 | YPDnc1 | YPDnc2 | YPDnc3 | YPDnc4 | EtOHnc1 | EtOHnc2 | Galnc1 | Galnc2 |
| 13 PHS1  | YJL097W  | YPDcl2 | YPDcl3 | EtOHcl1 | EtOHcl2 | Galcl1 | YPDnc1 | YPDnc2 | YPDnc3 | YPDnc4 | EtOHnc1 | EtOHnc2 | Galnc1 | Galnc2 |
| 13 GRX5  | YPL059W  | YPDcl2 | YPDcl3 | EtOHcl1 | EtOHcl2 | Galcl1 | YPDnc1 | YPDnc2 | YPDnc3 | YPDnc4 | EtOHnc1 | EtOHnc2 | Galnc1 | Galnc2 |
| 13 TYW3  | YGL050W  | YPDcl2 | YPDcl3 | EtOHcl1 | EtOHcl2 | Galcl1 | YPDnc1 | YPDnc2 | YPDnc3 | YPDnc4 | EtOHnc1 | EtOHnc2 | Galnc1 | Galnc2 |
| 13 PMT5  | YDL093W  | YPDcl2 | YPDcl3 | EtOHcl1 | EtOHcl2 | Galcl1 | YPDnc1 | YPDnc2 | YPDnc3 | YPDnc4 | EtOHnc1 | EtOHnc2 | Galnc1 | Galnc2 |
| 13 PEX22 | YAL055W  | YPDcl2 | YPDcl3 | EtOHcl1 | EtOHcl2 | Galcl1 | YPDnc1 | YPDnc2 | YPDnc3 | YPDnc4 | EtOHnc1 | EtOHnc2 | Galnc1 | Galnc2 |
| 13 DLD1  | YDL174C  | YPDcl2 | YPDcl3 | EtOHcl1 | EtOHcl2 | Galcl1 | YPDnc1 | YPDnc2 | YPDnc3 | YPDnc4 | EtOHnc1 | EtOHnc2 | Galnc1 | Galnc2 |
| 13 UBC7  | YMR022W  | YPDcl2 | YPDcl3 | EtOHcl1 | EtOHcl2 | Galcl1 | YPDnc1 | YPDnc2 | YPDnc3 | YPDnc4 | EtOHnc1 | EtOHnc2 | Galnc1 | Galnc2 |
| 13 TAE1  | YBR261C  | YPDcl2 | YPDcl3 | EtOHcl1 | EtOHcl2 | Galcl1 | YPDnc1 | YPDnc2 | YPDnc3 | YPDnc4 | EtOHnc1 | EtOHnc2 | Galnc1 | Galnc2 |
| 13 YCK1  | YHR135C  | YPDcl2 | YPDcl3 | EtOHcl1 | EtOHcl2 | Galcl1 | YPDnc1 | YPDnc2 | YPDnc3 | YPDnc4 | EtOHnc1 | EtOHnc2 | Galnc1 | Galnc2 |
| 13 CTK3  | YML112W  | YPDcl2 | YPDcl3 | EtOHcl1 | EtOHcl2 | Galcl1 | YPDnc1 | YPDnc2 | YPDnc3 | YPDnc4 | EtOHnc1 | EtOHnc2 | Galnc1 | Galnc2 |
| 13 BUG1  | YDL099W  | YPDcl2 | YPDcl3 | EtOHcl1 | EtOHcl2 | Galcl1 | YPDnc1 | YPDnc2 | YPDnc3 | YPDnc4 | EtOHnc1 | EtOHnc2 | Galnc1 | Galnc2 |
| 13 ZUO1  | YGR285C  | YPDcl2 | YPDcl3 | EtOHcl1 | EtOHcl2 | Galcl1 | YPDnc1 | YPDnc2 | YPDnc3 | YPDnc4 | EtOHnc1 | EtOHnc2 | Galnc1 | Galnc2 |
| 13 ENV7  | YPL236C  | YPDcl2 | YPDcl3 | EtOHcl1 | EtOHcl2 | Galcl1 | YPDnc1 | YPDnc2 | YPDnc3 | YPDnc4 | EtOHnc1 | EtOHnc2 | Galnc1 | Galnc2 |

|    |        |           |        |        |         |         |        |        |        |        |        |         |         |        |        |
|----|--------|-----------|--------|--------|---------|---------|--------|--------|--------|--------|--------|---------|---------|--------|--------|
| 13 | REG1   | YDR028C   | YPDcl2 | YPDcl3 | EtOHcl1 | EtOHcl2 | Galcl1 | YPDnc1 | YPDnc2 | YPDnc3 | YPDnc4 | EtOHnc1 | EtOHnc2 | Galnc1 | Galnc2 |
| 13 | BST1   | YFL025C   | YPDcl2 | YPDcl3 | EtOHcl1 | EtOHcl2 | Galcl1 | YPDnc1 | YPDnc2 | YPDnc3 | YPDnc4 | EtOHnc1 | EtOHnc2 | Galnc1 | Galnc2 |
| 13 | CWC15  | YDR163W   | YPDcl2 | YPDcl3 | EtOHcl1 | EtOHcl2 | Galcl1 | YPDnc1 | YPDnc2 | YPDnc3 | YPDnc4 | EtOHnc1 | EtOHnc2 | Galnc1 | Galnc2 |
| 13 | XPT1   | YJR133W   | YPDcl2 | YPDcl3 | EtOHcl1 | EtOHcl2 | Galcl1 | YPDnc1 | YPDnc2 | YPDnc3 | YPDnc4 | EtOHnc1 | EtOHnc2 | Galnc1 | Galnc2 |
| 13 |        | YKL171W   | YPDcl2 | YPDcl3 | EtOHcl1 | EtOHcl2 | Galcl1 | YPDnc1 | YPDnc2 | YPDnc3 | YPDnc4 | EtOHnc1 | EtOHnc2 | Galnc1 | Galnc2 |
| 13 | OPI3   | YJR073C   | YPDcl2 | YPDcl3 | EtOHcl1 | EtOHcl2 | Galcl1 | YPDnc1 | YPDnc2 | YPDnc3 | YPDnc4 | EtOHnc1 | EtOHnc2 | Galnc1 | Galnc2 |
| 13 | ELP4   | YPL101W   | YPDcl2 | YPDcl3 | EtOHcl1 | EtOHcl2 | Galcl1 | YPDnc1 | YPDnc2 | YPDnc3 | YPDnc4 | EtOHnc1 | EtOHnc2 | Galnc1 | Galnc2 |
| 13 | CAF130 | YGR134W   | YPDcl2 | YPDcl3 | EtOHcl1 | EtOHcl2 | Galcl1 | YPDnc1 | YPDnc2 | YPDnc3 | YPDnc4 | EtOHnc1 | EtOHnc2 | Galnc1 | Galnc2 |
| 13 |        | YKL075C   | YPDcl2 | YPDcl3 | EtOHcl1 | EtOHcl2 | Galcl1 | YPDnc1 | YPDnc2 | YPDnc3 | YPDnc4 | EtOHnc1 | EtOHnc2 | Galnc1 | Galnc2 |
| 13 | PKC1   | YBL105C   | YPDcl2 | YPDcl3 | EtOHcl1 | EtOHcl2 | Galcl1 | YPDnc1 | YPDnc2 | YPDnc3 | YPDnc4 | EtOHnc1 | EtOHnc2 | Galnc1 | Galnc2 |
| 13 |        | YLR198C   | YPDcl2 | YPDcl3 | EtOHcl1 | EtOHcl2 | Galcl1 | YPDnc1 | YPDnc2 | YPDnc3 | YPDnc4 | EtOHnc1 | EtOHnc2 | Galnc1 | Galnc2 |
| 13 |        | YJR107W   | YPDcl2 | YPDcl3 | EtOHcl1 | EtOHcl2 | Galcl1 | YPDnc1 | YPDnc2 | YPDnc3 | YPDnc4 | EtOHnc1 | EtOHnc2 | Galnc1 | Galnc2 |
| 13 | GPI17  | YDR434W   | YPDcl2 | YPDcl3 | EtOHcl1 | EtOHcl2 | Galcl1 | YPDnc1 | YPDnc2 | YPDnc3 | YPDnc4 | EtOHnc1 | EtOHnc2 | Galnc1 | Galnc2 |
| 13 | PFA3   | YNL326C   | YPDcl2 | YPDcl3 | EtOHcl1 | EtOHcl2 | Galcl1 | YPDnc1 | YPDnc2 | YPDnc3 | YPDnc4 | EtOHnc1 | EtOHnc2 | Galnc1 | Galnc2 |
| 13 | BYE1   | YKL005C   | YPDcl2 | YPDcl3 | EtOHcl1 | EtOHcl2 | Galcl1 | YPDnc1 | YPDnc2 | YPDnc3 | YPDnc4 | EtOHnc1 | EtOHnc2 | Galnc1 | Galnc2 |
| 13 |        | YOR021C   | YPDcl2 | YPDcl3 | EtOHcl1 | EtOHcl2 | Galcl1 | YPDnc1 | YPDnc2 | YPDnc3 | YPDnc4 | EtOHnc1 | EtOHnc2 | Galnc1 | Galnc2 |
| 13 | AIR1   | YIL079C   | YPDcl2 | YPDcl3 | EtOHcl1 | EtOHcl2 | Galcl1 | YPDnc1 | YPDnc2 | YPDnc3 | YPDnc4 | EtOHnc1 | EtOHnc2 | Galnc1 | Galnc2 |
| 13 |        | YDL041W   | YPDcl2 | YPDcl3 | EtOHcl1 | EtOHcl2 | Galcl1 | YPDnc1 | YPDnc2 | YPDnc3 | YPDnc4 | EtOHnc1 | EtOHnc2 | Galnc1 | Galnc2 |
| 13 | TLG2   | YOL018C   | YPDcl2 | YPDcl3 | EtOHcl1 | EtOHcl2 | Galcl1 | YPDnc1 | YPDnc2 | YPDnc3 | YPDnc4 | EtOHnc1 | EtOHnc2 | Galnc1 | Galnc2 |
| 13 |        | YNR029C   | YPDcl2 | YPDcl3 | EtOHcl1 | EtOHcl2 | Galcl1 | YPDnc1 | YPDnc2 | YPDnc3 | YPDnc4 | EtOHnc1 | EtOHnc2 | Galnc1 | Galnc2 |
| 13 | YPC1   | YBR183W   | YPDcl2 | YPDcl3 | EtOHcl1 | EtOHcl2 | Galcl1 | YPDnc1 | YPDnc2 | YPDnc3 | YPDnc4 | EtOHnc1 | EtOHnc2 | Galnc1 | Galnc2 |
| 13 | NUP60  | YAR002W   | YPDcl2 | YPDcl3 | EtOHcl1 | EtOHcl2 | Galcl1 | YPDnc1 | YPDnc2 | YPDnc3 | YPDnc4 | EtOHnc1 | EtOHnc2 | Galnc1 | Galnc2 |
| 13 |        | YNL296W   | YPDcl2 | YPDcl3 | EtOHcl1 | EtOHcl2 | Galcl1 | YPDnc1 | YPDnc2 | YPDnc3 | YPDnc4 | EtOHnc1 | EtOHnc2 | Galnc1 | Galnc2 |
| 13 | YRB2   | YIL063C   | YPDcl2 | YPDcl3 | EtOHcl1 | EtOHcl2 | Galcl1 | YPDnc1 | YPDnc2 | YPDnc3 | YPDnc4 | EtOHnc1 | EtOHnc2 | Galnc1 | Galnc2 |
| 13 | RET3   | YPL010W   | YPDcl2 | YPDcl3 | EtOHcl1 | EtOHcl2 | Galcl1 | YPDnc1 | YPDnc2 | YPDnc3 | YPDnc4 | EtOHnc1 | EtOHnc2 | Galnc1 | Galnc2 |
| 13 | PZF1   | YPR186C   | YPDcl2 | YPDcl3 | EtOHcl1 | EtOHcl2 | Galcl1 | YPDnc1 | YPDnc2 | YPDnc3 | YPDnc4 | EtOHnc1 | EtOHnc2 | Galnc1 | Galnc2 |
| 13 |        | YBR131C-A | YPDcl2 | YPDcl3 | EtOHcl1 | EtOHcl2 | Galcl1 | YPDnc1 | YPDnc2 | YPDnc3 | YPDnc4 | EtOHnc1 | EtOHnc2 | Galnc1 | Galnc2 |
| 13 | THP2   | YHR167W   | YPDcl2 | YPDcl3 | EtOHcl1 | EtOHcl2 | Galcl1 | YPDnc1 | YPDnc2 | YPDnc3 | YPDnc4 | EtOHnc1 | EtOHnc2 | Galnc1 | Galnc2 |
| 13 | HPA3   | YEL066W   | YPDcl2 | YPDcl3 | EtOHcl1 | EtOHcl2 | Galcl1 | YPDnc1 | YPDnc2 | YPDnc3 | YPDnc4 | EtOHnc1 | EtOHnc2 | Galnc1 | Galnc2 |
| 13 | NOB1   | YOR056C   | YPDcl2 | YPDcl3 | EtOHcl1 | EtOHcl2 | Galcl1 | YPDnc1 | YPDnc2 | YPDnc3 | YPDnc4 | EtOHnc1 | EtOHnc2 | Galnc1 | Galnc2 |
| 13 | MAP2   | YBL091C   | YPDcl2 | YPDcl3 | EtOHcl1 | EtOHcl2 | Galcl1 | YPDnc1 | YPDnc2 | YPDnc3 | YPDnc4 | EtOHnc1 | EtOHnc2 | Galnc1 | Galnc2 |
| 13 | QCR6   | YFR033C   | YPDcl2 | YPDcl3 | EtOHcl1 | EtOHcl2 | Galcl1 | YPDnc1 | YPDnc2 | YPDnc3 | YPDnc4 | EtOHnc1 | EtOHnc2 | Galnc1 | Galnc2 |
| 13 | MSS116 | YDR194C   | YPDcl2 | YPDcl3 | EtOHcl1 | EtOHcl2 | Galcl1 | YPDnc1 | YPDnc2 | YPDnc3 | YPDnc4 | EtOHnc1 | EtOHnc2 | Galnc1 | Galnc2 |
| 13 |        | YHR022C-A | YPDcl2 | YPDcl3 | EtOHcl1 | EtOHcl2 | Galcl1 | YPDnc1 | YPDnc2 | YPDnc3 | YPDnc4 | EtOHnc1 | EtOHnc2 | Galnc1 | Galnc2 |



|    |          |         |        |         |         |         |        |        |        |        |         |         |         |        |        |
|----|----------|---------|--------|---------|---------|---------|--------|--------|--------|--------|---------|---------|---------|--------|--------|
| 13 | YHR165W- | YPDcl2  | YPDcl3 | EtOHcl1 | EtOHcl2 | Galcl1  | YPDnc1 | YPDnc2 | YPDnc3 | YPDnc4 | EtOHnc1 | EtOHnc2 | Galnc1  | Galnc2 |        |
| 13 | ATP22    | YDR350C | YPDcl2 | YPDcl3  | EtOHcl1 | EtOHcl2 | Galcl1 | YPDnc1 | YPDnc2 | YPDnc3 | YPDnc4  | EtOHnc1 | EtOHnc2 | Galnc1 | Galnc2 |
| 13 | SPO20    | YMR017W | YPDcl2 | YPDcl3  | EtOHcl1 | EtOHcl2 | Galcl1 | YPDnc1 | YPDnc2 | YPDnc3 | YPDnc4  | EtOHnc1 | EtOHnc2 | Galnc1 | Galnc2 |
| 13 | ARP8     | YOR141C | YPDcl2 | YPDcl3  | EtOHcl1 | EtOHcl2 | Galcl1 | YPDnc1 | YPDnc2 | YPDnc3 | YPDnc4  | EtOHnc1 | EtOHnc2 | Galnc1 | Galnc2 |
| 13 | PRP3     | YDR473C | YPDcl2 | YPDcl3  | EtOHcl1 | EtOHcl2 | Galcl1 | YPDnc1 | YPDnc2 | YPDnc3 | YPDnc4  | EtOHnc1 | EtOHnc2 | Galnc1 | Galnc2 |
| 13 |          | YDL057W | YPDcl2 | YPDcl3  | EtOHcl1 | EtOHcl2 | Galcl1 | YPDnc1 | YPDnc2 | YPDnc3 | YPDnc4  | EtOHnc1 | EtOHnc2 | Galnc1 | Galnc2 |
| 13 | DAL7     | YIR031C | YPDcl2 | YPDcl3  | EtOHcl1 | EtOHcl2 | Galcl1 | YPDnc1 | YPDnc2 | YPDnc3 | YPDnc4  | EtOHnc1 | EtOHnc2 | Galnc1 | Galnc2 |
| 13 | STE3     | YKL178C | YPDcl2 | YPDcl3  | EtOHcl1 | EtOHcl2 | Galcl1 | YPDnc1 | YPDnc2 | YPDnc3 | YPDnc4  | EtOHnc1 | EtOHnc2 | Galnc1 | Galnc2 |
| 13 | VAM6     | YDL077C | YPDcl2 | YPDcl3  | EtOHcl1 | EtOHcl2 | Galcl1 | YPDnc1 | YPDnc2 | YPDnc3 | YPDnc4  | EtOHnc1 | EtOHnc2 | Galnc1 | Galnc2 |
| 13 | TOS8     | YGL096W | YPDcl2 | YPDcl3  | EtOHcl1 | EtOHcl2 | Galcl1 | YPDnc1 | YPDnc2 | YPDnc3 | YPDnc4  | EtOHnc1 | EtOHnc2 | Galnc1 | Galnc2 |
| 13 | PRP24    | YMR268C | YPDcl2 | YPDcl3  | EtOHcl1 | EtOHcl2 | Galcl1 | YPDnc1 | YPDnc2 | YPDnc3 | YPDnc4  | EtOHnc1 | EtOHnc2 | Galnc1 | Galnc2 |
| 13 | RET1     | YOR207C | YPDcl2 | YPDcl3  | EtOHcl1 | EtOHcl2 | Galcl1 | YPDnc1 | YPDnc2 | YPDnc3 | YPDnc4  | EtOHnc1 | EtOHnc2 | Galnc1 | Galnc2 |
| 13 | RVS161   | YCR009C | YPDcl2 | YPDcl3  | EtOHcl1 | EtOHcl2 | Galcl1 | YPDnc1 | YPDnc2 | YPDnc3 | YPDnc4  | EtOHnc1 | EtOHnc2 | Galnc1 | Galnc2 |
| 13 |          | YLR053C | YPDcl2 | YPDcl3  | EtOHcl1 | EtOHcl2 | Galcl1 | YPDnc1 | YPDnc2 | YPDnc3 | YPDnc4  | EtOHnc1 | EtOHnc2 | Galnc1 | Galnc2 |
| 13 | IGO1     | YNL157W | YPDcl2 | YPDcl3  | EtOHcl1 | EtOHcl2 | Galcl1 | YPDnc1 | YPDnc2 | YPDnc3 | YPDnc4  | EtOHnc1 | EtOHnc2 | Galnc1 | Galnc2 |
| 13 | NFU1     | YKL040C | YPDcl2 | YPDcl3  | EtOHcl1 | EtOHcl2 | Galcl1 | YPDnc1 | YPDnc2 | YPDnc3 | YPDnc4  | EtOHnc1 | EtOHnc2 | Galnc1 | Galnc2 |
| 13 | NUP120   | YKL057C | YPDcl2 | YPDcl3  | EtOHcl1 | EtOHcl2 | Galcl1 | YPDnc1 | YPDnc2 | YPDnc3 | YPDnc4  | EtOHnc1 | EtOHnc2 | Galnc1 | Galnc2 |
| 13 |          | YLR211C | YPDcl2 | YPDcl3  | EtOHcl1 | EtOHcl2 | Galcl1 | YPDnc1 | YPDnc2 | YPDnc3 | YPDnc4  | EtOHnc1 | EtOHnc2 | Galnc1 | Galnc2 |
| 13 | GEP5     | YLR091W | YPDcl2 | YPDcl3  | EtOHcl1 | EtOHcl2 | Galcl1 | YPDnc1 | YPDnc2 | YPDnc3 | YPDnc4  | EtOHnc1 | EtOHnc2 | Galnc1 | Galnc2 |
| 13 | WAR1     | YML076C | YPDcl2 | YPDcl3  | EtOHcl1 | EtOHcl2 | Galcl1 | YPDnc1 | YPDnc2 | YPDnc3 | YPDnc4  | EtOHnc1 | EtOHnc2 | Galnc1 | Galnc2 |
| 13 | BRE5     | YNR051C | YPDcl2 | YPDcl3  | EtOHcl1 | EtOHcl2 | Galcl1 | YPDnc1 | YPDnc2 | YPDnc3 | YPDnc4  | EtOHnc1 | EtOHnc2 | Galnc1 | Galnc2 |
| 13 | PAD1     | YDR538W | YPDcl2 | YPDcl3  | EtOHcl1 | EtOHcl2 | Galcl1 | YPDnc1 | YPDnc2 | YPDnc3 | YPDnc4  | EtOHnc1 | EtOHnc2 | Galnc1 | Galnc2 |
| 13 | ERV29    | YGR284C | YPDcl2 | YPDcl3  | EtOHcl1 | EtOHcl2 | Galcl1 | YPDnc1 | YPDnc2 | YPDnc3 | YPDnc4  | EtOHnc1 | EtOHnc2 | Galnc1 | Galnc2 |
| 13 | GLC8     | YMR311C | YPDcl2 | YPDcl3  | EtOHcl1 | EtOHcl2 | Galcl1 | YPDnc1 | YPDnc2 | YPDnc3 | YPDnc4  | EtOHnc1 | EtOHnc2 | Galnc1 | Galnc2 |
| 13 | SLF1     | YDR515W | YPDcl2 | YPDcl3  | EtOHcl1 | EtOHcl2 | Galcl1 | YPDnc1 | YPDnc2 | YPDnc3 | YPDnc4  | EtOHnc1 | EtOHnc2 | Galnc1 | Galnc2 |
| 13 | PRM1     | YNL279W | YPDcl2 | YPDcl3  | EtOHcl1 | EtOHcl2 | Galcl1 | YPDnc1 | YPDnc2 | YPDnc3 | YPDnc4  | EtOHnc1 | EtOHnc2 | Galnc1 | Galnc2 |
| 13 | MRPL10   | YNL284C | YPDcl2 | YPDcl3  | EtOHcl1 | EtOHcl2 | Galcl1 | YPDnc1 | YPDnc2 | YPDnc3 | YPDnc4  | EtOHnc1 | EtOHnc2 | Galnc1 | Galnc2 |
| 13 | ABD1     | YBR236C | YPDcl2 | YPDcl3  | EtOHcl1 | EtOHcl2 | Galcl1 | YPDnc1 | YPDnc2 | YPDnc3 | YPDnc4  | EtOHnc1 | EtOHnc2 | Galnc1 | Galnc2 |
| 13 | GPT2     | YKR067W | YPDcl2 | YPDcl3  | EtOHcl1 | EtOHcl2 | Galcl1 | YPDnc1 | YPDnc2 | YPDnc3 | YPDnc4  | EtOHnc1 | EtOHnc2 | Galnc1 | Galnc2 |
| 13 | LAG2     | YOL025W | YPDcl2 | YPDcl3  | EtOHcl1 | EtOHcl2 | Galcl1 | YPDnc1 | YPDnc2 | YPDnc3 | YPDnc4  | EtOHnc1 | EtOHnc2 | Galnc1 | Galnc2 |
| 13 |          | YJR011C | YPDcl2 | YPDcl3  | EtOHcl1 | EtOHcl2 | Galcl1 | YPDnc1 | YPDnc2 | YPDnc3 | YPDnc4  | EtOHnc1 | EtOHnc2 | Galnc1 | Galnc2 |
| 13 | SNM1     | YDR478W | YPDcl2 | YPDcl3  | EtOHcl1 | EtOHcl2 | Galcl1 | YPDnc1 | YPDnc2 | YPDnc3 | YPDnc4  | EtOHnc1 | EtOHnc2 | Galnc1 | Galnc2 |
| 13 | BUD32    | YGR262C | YPDcl2 | YPDcl3  | EtOHcl1 | EtOHcl2 | Galcl1 | YPDnc1 | YPDnc2 | YPDnc3 | YPDnc4  | EtOHnc1 | EtOHnc2 | Galnc1 | Galnc2 |
| 13 | DAL3     | YIR032C | YPDcl2 | YPDcl3  | EtOHcl1 | EtOHcl2 | Galcl1 | YPDnc1 | YPDnc2 | YPDnc3 | YPDnc4  | EtOHnc1 | EtOHnc2 | Galnc1 | Galnc2 |

|    |        |           |        |        |         |         |        |        |        |        |        |         |         |        |        |
|----|--------|-----------|--------|--------|---------|---------|--------|--------|--------|--------|--------|---------|---------|--------|--------|
| 13 | ATP12  | YJL180C   | YPDcl2 | YPDcl3 | EtOHcl1 | EtOHcl2 | Galcl1 | YPDnc1 | YPDnc2 | YPDnc3 | YPDnc4 | EtOHnc1 | EtOHnc2 | Galnc1 | Galnc2 |
| 13 | RRP40  | YOL142W   | YPDcl2 | YPDcl3 | EtOHcl1 | EtOHcl2 | Galcl1 | YPDnc1 | YPDnc2 | YPDnc3 | YPDnc4 | EtOHnc1 | EtOHnc2 | Galnc1 | Galnc2 |
| 13 | MRK1   | YDL079C   | YPDcl2 | YPDcl3 | EtOHcl1 | EtOHcl2 | Galcl1 | YPDnc1 | YPDnc2 | YPDnc3 | YPDnc4 | EtOHnc1 | EtOHnc2 | Galnc1 | Galnc2 |
| 13 | SOM1   | YEL059C-A | YPDcl2 | YPDcl3 | EtOHcl1 | EtOHcl2 | Galcl1 | YPDnc1 | YPDnc2 | YPDnc3 | YPDnc4 | EtOHnc1 | EtOHnc2 | Galnc1 | Galnc2 |
| 13 | DBP7   | YKR024C   | YPDcl2 | YPDcl3 | EtOHcl1 | EtOHcl2 | Galcl1 | YPDnc1 | YPDnc2 | YPDnc3 | YPDnc4 | EtOHnc1 | EtOHnc2 | Galnc1 | Galnc2 |
| 13 |        | YGR259C   | YPDcl2 | YPDcl3 | EtOHcl1 | EtOHcl2 | Galcl1 | YPDnc1 | YPDnc2 | YPDnc3 | YPDnc4 | EtOHnc1 | EtOHnc2 | Galnc1 | Galnc2 |
| 13 | MAK5   | YBR142W   | YPDcl2 | YPDcl3 | EtOHcl1 | EtOHcl2 | Galcl1 | YPDnc1 | YPDnc2 | YPDnc3 | YPDnc4 | EtOHnc1 | EtOHnc2 | Galnc1 | Galnc2 |
| 13 | ICS3   | YJL077C   | YPDcl2 | YPDcl3 | EtOHcl1 | EtOHcl2 | Galcl1 | YPDnc1 | YPDnc2 | YPDnc3 | YPDnc4 | EtOHnc1 | EtOHnc2 | Galnc1 | Galnc2 |
| 13 | CMS1   | YLR003C   | YPDcl2 | YPDcl3 | EtOHcl1 | EtOHcl2 | Galcl1 | YPDnc1 | YPDnc2 | YPDnc3 | YPDnc4 | EtOHnc1 | EtOHnc2 | Galnc1 | Galnc2 |
| 13 | EOS1   | YNL080C   | YPDcl2 | YPDcl3 | EtOHcl1 | EtOHcl2 | Galcl1 | YPDnc1 | YPDnc2 | YPDnc3 | YPDnc4 | EtOHnc1 | EtOHnc2 | Galnc1 | Galnc2 |
| 13 |        | YOL150C   | YPDcl2 | YPDcl3 | EtOHcl1 | EtOHcl2 | Galcl1 | YPDnc1 | YPDnc2 | YPDnc3 | YPDnc4 | EtOHnc1 | EtOHnc2 | Galnc1 | Galnc2 |
| 13 | FAR11  | YNL127W   | YPDcl2 | YPDcl3 | EtOHcl1 | EtOHcl2 | Galcl1 | YPDnc1 | YPDnc2 | YPDnc3 | YPDnc4 | EtOHnc1 | EtOHnc2 | Galnc1 | Galnc2 |
| 13 | LRE1   | YCL051W   | YPDcl2 | YPDcl3 | EtOHcl1 | EtOHcl2 | Galcl1 | YPDnc1 | YPDnc2 | YPDnc3 | YPDnc4 | EtOHnc1 | EtOHnc2 | Galnc1 | Galnc2 |
| 13 | MMT1   | YMR177W   | YPDcl2 | YPDcl3 | EtOHcl1 | EtOHcl2 | Galcl1 | YPDnc1 | YPDnc2 | YPDnc3 | YPDnc4 | EtOHnc1 | EtOHnc2 | Galnc1 | Galnc2 |
| 13 | YPK9   | YOR291W   | YPDcl2 | YPDcl3 | EtOHcl1 | EtOHcl2 | Galcl1 | YPDnc1 | YPDnc2 | YPDnc3 | YPDnc4 | EtOHnc1 | EtOHnc2 | Galnc1 | Galnc2 |
| 13 | FLC2   | YAL053W   | YPDcl2 | YPDcl3 | EtOHcl1 | EtOHcl2 | Galcl1 | YPDnc1 | YPDnc2 | YPDnc3 | YPDnc4 | EtOHnc1 | EtOHnc2 | Galnc1 | Galnc2 |
| 13 | RPL41B | YDL133C-A | YPDcl2 | YPDcl3 | EtOHcl1 | EtOHcl2 | Galcl1 | YPDnc1 | YPDnc2 | YPDnc3 | YPDnc4 | EtOHnc1 | EtOHnc2 | Galnc1 | Galnc2 |
| 13 | FBA1   | YKL060C   | YPDcl2 | YPDcl3 | EtOHcl1 | EtOHcl2 | Galcl1 | YPDnc1 | YPDnc2 | YPDnc3 | YPDnc4 | EtOHnc1 | EtOHnc2 | Galnc1 | Galnc2 |
| 13 | TAF6   | YGL112C   | YPDcl2 | YPDcl3 | EtOHcl1 | EtOHcl2 | Galcl1 | YPDnc1 | YPDnc2 | YPDnc3 | YPDnc4 | EtOHnc1 | EtOHnc2 | Galnc1 | Galnc2 |
| 13 | MBA1   | YBR185C   | YPDcl2 | YPDcl3 | EtOHcl1 | EtOHcl2 | Galcl1 | YPDnc1 | YPDnc2 | YPDnc3 | YPDnc4 | EtOHnc1 | EtOHnc2 | Galnc1 | Galnc2 |
| 13 | CKB1   | YGL019W   | YPDcl2 | YPDcl3 | EtOHcl1 | EtOHcl2 | Galcl1 | YPDnc1 | YPDnc2 | YPDnc3 | YPDnc4 | EtOHnc1 | EtOHnc2 | Galnc1 | Galnc2 |
| 13 | SLI15  | YBR156C   | YPDcl2 | YPDcl3 | EtOHcl1 | EtOHcl2 | Galcl1 | YPDnc1 | YPDnc2 | YPDnc3 | YPDnc4 | EtOHnc1 | EtOHnc2 | Galnc1 | Galnc2 |
| 13 |        | YMR272W   | YPDcl2 | YPDcl3 | EtOHcl1 | EtOHcl2 | Galcl1 | YPDnc1 | YPDnc2 | YPDnc3 | YPDnc4 | EtOHnc1 | EtOHnc2 | Galnc1 | Galnc2 |
| 13 | RAD2   | YGR258C   | YPDcl2 | YPDcl3 | EtOHcl1 | EtOHcl2 | Galcl1 | YPDnc1 | YPDnc2 | YPDnc3 | YPDnc4 | EtOHnc1 | EtOHnc2 | Galnc1 | Galnc2 |
| 13 | STF2   | YGR008C   | YPDcl2 | YPDcl3 | EtOHcl1 | EtOHcl2 | Galcl1 | YPDnc1 | YPDnc2 | YPDnc3 | YPDnc4 | EtOHnc1 | EtOHnc2 | Galnc1 | Galnc2 |
| 13 | NCR1   | YPL006W   | YPDcl2 | YPDcl3 | EtOHcl1 | EtOHcl2 | Galcl1 | YPDnc1 | YPDnc2 | YPDnc3 | YPDnc4 | EtOHnc1 | EtOHnc2 | Galnc1 | Galnc2 |
| 13 |        | YFR054C   | YPDcl2 | YPDcl3 | EtOHcl1 | EtOHcl2 | Galcl1 | YPDnc1 | YPDnc2 | YPDnc3 | YPDnc4 | EtOHnc1 | EtOHnc2 | Galnc1 | Galnc2 |
| 13 | MRP17  | YKL003C   | YPDcl2 | YPDcl3 | EtOHcl1 | EtOHcl2 | Galcl1 | YPDnc1 | YPDnc2 | YPDnc3 | YPDnc4 | EtOHnc1 | EtOHnc2 | Galnc1 | Galnc2 |
| 13 | DUG3   | YNL191W   | YPDcl2 | YPDcl3 | EtOHcl1 | EtOHcl2 | Galcl1 | YPDnc1 | YPDnc2 | YPDnc3 | YPDnc4 | EtOHnc1 | EtOHnc2 | Galnc1 | Galnc2 |
| 13 | RTG1   | YOL067C   | YPDcl2 | YPDcl3 | EtOHcl1 | EtOHcl2 | Galcl1 | YPDnc1 | YPDnc2 | YPDnc3 | YPDnc4 | EtOHnc1 | EtOHnc2 | Galnc1 | Galnc2 |
| 13 |        | YLL058W   | YPDcl2 | YPDcl3 | EtOHcl1 | EtOHcl2 | Galcl1 | YPDnc1 | YPDnc2 | YPDnc3 | YPDnc4 | EtOHnc1 | EtOHnc2 | Galnc1 | Galnc2 |
| 13 | ARC18  | YLR370C   | YPDcl2 | YPDcl3 | EtOHcl1 | EtOHcl2 | Galcl1 | YPDnc1 | YPDnc2 | YPDnc3 | YPDnc4 | EtOHnc1 | EtOHnc2 | Galnc1 | Galnc2 |
| 13 |        | YDR526C   | YPDcl2 | YPDcl3 | EtOHcl1 | EtOHcl2 | Galcl1 | YPDnc1 | YPDnc2 | YPDnc3 | YPDnc4 | EtOHnc1 | EtOHnc2 | Galnc1 | Galnc2 |
| 13 |        | YDL121C   | YPDcl2 | YPDcl3 | EtOHcl1 | EtOHcl2 | Galcl1 | YPDnc1 | YPDnc2 | YPDnc3 | YPDnc4 | EtOHnc1 | EtOHnc2 | Galnc1 | Galnc2 |

|           |           |        |        |         |         |        |        |        |        |        |         |         |        |        |
|-----------|-----------|--------|--------|---------|---------|--------|--------|--------|--------|--------|---------|---------|--------|--------|
| 13 COX5B  | YIL111W   | YPDcl2 | YPDcl3 | EtOHcl1 | EtOHcl2 | Galcl1 | YPDnc1 | YPDnc2 | YPDnc3 | YPDnc4 | EtOHnc1 | EtOHnc2 | Galnc1 | Galnc2 |
| 13 ATP25  | YMR098C   | YPDcl2 | YPDcl3 | EtOHcl1 | EtOHcl2 | Galcl1 | YPDnc1 | YPDnc2 | YPDnc3 | YPDnc4 | EtOHnc1 | EtOHnc2 | Galnc1 | Galnc2 |
| 13 CPR4   | YCR069W   | YPDcl2 | YPDcl3 | EtOHcl1 | EtOHcl2 | Galcl1 | YPDnc1 | YPDnc2 | YPDnc3 | YPDnc4 | EtOHnc1 | EtOHnc2 | Galnc1 | Galnc2 |
| 13        | YKL169C   | YPDcl2 | YPDcl3 | EtOHcl1 | EtOHcl2 | Galcl1 | YPDnc1 | YPDnc2 | YPDnc3 | YPDnc4 | EtOHnc1 | EtOHnc2 | Galnc1 | Galnc2 |
| 13 SIT4   | YDL047W   | YPDcl2 | YPDcl3 | EtOHcl1 | EtOHcl2 | Galcl1 | YPDnc1 | YPDnc2 | YPDnc3 | YPDnc4 | EtOHnc1 | EtOHnc2 | Galnc1 | Galnc2 |
| 13 AUR1   | YKL004W   | YPDcl2 | YPDcl3 | EtOHcl1 | EtOHcl2 | Galcl1 | YPDnc1 | YPDnc2 | YPDnc3 | YPDnc4 | EtOHnc1 | EtOHnc2 | Galnc1 | Galnc2 |
| 13        | YLR241W   | YPDcl2 | YPDcl3 | EtOHcl1 | EtOHcl2 | Galcl1 | YPDnc1 | YPDnc2 | YPDnc3 | YPDnc4 | EtOHnc1 | EtOHnc2 | Galnc1 | Galnc2 |
| 13 SIL1   | YOL031C   | YPDcl2 | YPDcl3 | EtOHcl1 | EtOHcl2 | Galcl1 | YPDnc1 | YPDnc2 | YPDnc3 | YPDnc4 | EtOHnc1 | EtOHnc2 | Galnc1 | Galnc2 |
| 13 PAN1   | YIR006C   | YPDcl2 | YPDcl3 | EtOHcl1 | EtOHcl2 | Galcl1 | YPDnc1 | YPDnc2 | YPDnc3 | YPDnc4 | EtOHnc1 | EtOHnc2 | Galnc1 | Galnc2 |
| 13 RPL25  | YOL127W   | YPDcl2 | YPDcl3 | EtOHcl1 | EtOHcl2 | Galcl1 | YPDnc1 | YPDnc2 | YPDnc3 | YPDnc4 | EtOHnc1 | EtOHnc2 | Galnc1 | Galnc2 |
| 13 MKS1   | YNL076W   | YPDcl2 | YPDcl3 | EtOHcl1 | EtOHcl2 | Galcl1 | YPDnc1 | YPDnc2 | YPDnc3 | YPDnc4 | EtOHnc1 | EtOHnc2 | Galnc1 | Galnc2 |
| 13 SRP101 | YDR292C   | YPDcl2 | YPDcl3 | EtOHcl1 | EtOHcl2 | Galcl1 | YPDnc1 | YPDnc2 | YPDnc3 | YPDnc4 | EtOHnc1 | EtOHnc2 | Galnc1 | Galnc2 |
| 13        | YLR101C   | YPDcl2 | YPDcl3 | EtOHcl1 | EtOHcl2 | Galcl1 | YPDnc1 | YPDnc2 | YPDnc3 | YPDnc4 | EtOHnc1 | EtOHnc2 | Galnc1 | Galnc2 |
| 13        | YJR114W   | YPDcl2 | YPDcl3 | EtOHcl1 | EtOHcl2 | Galcl1 | YPDnc1 | YPDnc2 | YPDnc3 | YPDnc4 | EtOHnc1 | EtOHnc2 | Galnc1 | Galnc2 |
| 13 AIM27  | YKL207W   | YPDcl2 | YPDcl3 | EtOHcl1 | EtOHcl2 | Galcl1 | YPDnc1 | YPDnc2 | YPDnc3 | YPDnc4 | EtOHnc1 | EtOHnc2 | Galnc1 | Galnc2 |
| 13 SSC1   | YJR045C   | YPDcl2 | YPDcl3 | EtOHcl1 | EtOHcl2 | Galcl1 | YPDnc1 | YPDnc2 | YPDnc3 | YPDnc4 | EtOHnc1 | EtOHnc2 | Galnc1 | Galnc2 |
| 13 MCM2   | YBL023C   | YPDcl2 | YPDcl3 | EtOHcl1 | EtOHcl2 | Galcl1 | YPDnc1 | YPDnc2 | YPDnc3 | YPDnc4 | EtOHnc1 | EtOHnc2 | Galnc1 | Galnc2 |
| 13 MTC6   | YHR151C   | YPDcl2 | YPDcl3 | EtOHcl1 | EtOHcl2 | Galcl1 | YPDnc1 | YPDnc2 | YPDnc3 | YPDnc4 | EtOHnc1 | EtOHnc2 | Galnc1 | Galnc2 |
| 13        | YEL009C-A | YPDcl2 | YPDcl3 | EtOHcl1 | EtOHcl2 | Galcl1 | YPDnc1 | YPDnc2 | YPDnc3 | YPDnc4 | EtOHnc1 | EtOHnc2 | Galnc1 | Galnc2 |
| 13 PHO13  | YDL236W   | YPDcl2 | YPDcl3 | EtOHcl1 | EtOHcl2 | Galcl1 | YPDnc1 | YPDnc2 | YPDnc3 | YPDnc4 | EtOHnc1 | EtOHnc2 | Galnc1 | Galnc2 |
| 13        | YCL065W   | YPDcl2 | YPDcl3 | EtOHcl1 | EtOHcl2 | Galcl1 | YPDnc1 | YPDnc2 | YPDnc3 | YPDnc4 | EtOHnc1 | EtOHnc2 | Galnc1 | Galnc2 |
| 13 JHD1   | YER051W   | YPDcl2 | YPDcl3 | EtOHcl1 | EtOHcl2 | Galcl1 | YPDnc1 | YPDnc2 | YPDnc3 | YPDnc4 | EtOHnc1 | EtOHnc2 | Galnc1 | Galnc2 |
| 13 MHP1   | YJL042W   | YPDcl2 | YPDcl3 | EtOHcl1 | EtOHcl2 | Galcl1 | YPDnc1 | YPDnc2 | YPDnc3 | YPDnc4 | EtOHnc1 | EtOHnc2 | Galnc1 | Galnc2 |
| 13 TDA9   | YML081W   | YPDcl2 | YPDcl3 | EtOHcl1 | EtOHcl2 | Galcl1 | YPDnc1 | YPDnc2 | YPDnc3 | YPDnc4 | EtOHnc1 | EtOHnc2 | Galnc1 | Galnc2 |
| 13        | YEL057C   | YPDcl2 | YPDcl3 | EtOHcl1 | EtOHcl2 | Galcl1 | YPDnc1 | YPDnc2 | YPDnc3 | YPDnc4 | EtOHnc1 | EtOHnc2 | Galnc1 | Galnc2 |
| 13 GVP36  | YIL041W   | YPDcl2 | YPDcl3 | EtOHcl1 | EtOHcl2 | Galcl1 | YPDnc1 | YPDnc2 | YPDnc3 | YPDnc4 | EtOHnc1 | EtOHnc2 | Galnc1 | Galnc2 |
| 13 AIM41  | YOR215C   | YPDcl2 | YPDcl3 | EtOHcl1 | EtOHcl2 | Galcl1 | YPDnc1 | YPDnc2 | YPDnc3 | YPDnc4 | EtOHnc1 | EtOHnc2 | Galnc1 | Galnc2 |
| 13 KTR4   | YBR199W   | YPDcl2 | YPDcl3 | EtOHcl1 | EtOHcl2 | Galcl1 | YPDnc1 | YPDnc2 | YPDnc3 | YPDnc4 | EtOHnc1 | EtOHnc2 | Galnc1 | Galnc2 |
| 13        | YGL041W-  | YPDcl2 | YPDcl3 | EtOHcl1 | EtOHcl2 | Galcl1 | YPDnc1 | YPDnc2 | YPDnc3 | YPDnc4 | EtOHnc1 | EtOHnc2 | Galnc1 | Galnc2 |
| 13 ARG5,6 | YER069W   | YPDcl2 | YPDcl3 | EtOHcl1 | EtOHcl2 | Galcl1 | YPDnc1 | YPDnc2 | YPDnc3 | YPDnc4 | EtOHnc1 | EtOHnc2 | Galnc1 | Galnc2 |
| 13 SPE2   | YOL052C   | YPDcl2 | YPDcl3 | EtOHcl1 | EtOHcl2 | Galcl1 | YPDnc1 | YPDnc2 | YPDnc3 | YPDnc4 | EtOHnc1 | EtOHnc2 | Galnc1 | Galnc2 |
| 13        | YNL086W   | YPDcl2 | YPDcl3 | EtOHcl1 | EtOHcl2 | Galcl1 | YPDnc1 | YPDnc2 | YPDnc3 | YPDnc4 | EtOHnc1 | EtOHnc2 | Galnc1 | Galnc2 |
| 13        | YBL010C   | YPDcl2 | YPDcl3 | EtOHcl1 | EtOHcl2 | Galcl1 | YPDnc1 | YPDnc2 | YPDnc3 | YPDnc4 | EtOHnc1 | EtOHnc2 | Galnc1 | Galnc2 |
| 13        | YER148W-  | YPDcl2 | YPDcl3 | EtOHcl1 | EtOHcl2 | Galcl1 | YPDnc1 | YPDnc2 | YPDnc3 | YPDnc4 | EtOHnc1 | EtOHnc2 | Galnc1 | Galnc2 |

|    |       |           |        |        |         |         |        |        |        |        |        |         |         |        |        |
|----|-------|-----------|--------|--------|---------|---------|--------|--------|--------|--------|--------|---------|---------|--------|--------|
| 13 | RMD1  | YDL001W   | YPDcl2 | YPDcl3 | EtOHcl1 | EtOHcl2 | Galcl1 | YPDnc1 | YPDnc2 | YPDnc3 | YPDnc4 | EtOHnc1 | EtOHnc2 | Galnc1 | Galnc2 |
| 13 |       | YBR056W   | YPDcl2 | YPDcl3 | EtOHcl1 | EtOHcl2 | Galcl1 | YPDnc1 | YPDnc2 | YPDnc3 | YPDnc4 | EtOHnc1 | EtOHnc2 | Galnc1 | Galnc2 |
| 13 | SCW10 | YMR305C   | YPDcl2 | YPDcl3 | EtOHcl1 | EtOHcl2 | Galcl1 | YPDnc1 | YPDnc2 | YPDnc3 | YPDnc4 | EtOHnc1 | EtOHnc2 | Galnc1 | Galnc2 |
| 13 | NOP58 | YOR310C   | YPDcl2 | YPDcl3 | EtOHcl1 | EtOHcl2 | Galcl1 | YPDnc1 | YPDnc2 | YPDnc3 | YPDnc4 | EtOHnc1 | EtOHnc2 | Galnc1 | Galnc2 |
| 13 | CCS1  | YMR038C   | YPDcl2 | YPDcl3 | EtOHcl1 | EtOHcl2 | Galcl1 | YPDnc1 | YPDnc2 | YPDnc3 | YPDnc4 | EtOHnc1 | EtOHnc2 | Galnc1 | Galnc2 |
| 13 | ERG4  | YGL012W   | YPDcl2 | YPDcl3 | EtOHcl1 | EtOHcl2 | Galcl1 | YPDnc1 | YPDnc2 | YPDnc3 | YPDnc4 | EtOHnc1 | EtOHnc2 | Galnc1 | Galnc2 |
| 13 |       | YJL020W-A | YPDcl2 | YPDcl3 | EtOHcl1 | EtOHcl2 | Galcl1 | YPDnc1 | YPDnc2 | YPDnc3 | YPDnc4 | EtOHnc1 | EtOHnc2 | Galnc1 | Galnc2 |
| 13 | YSR3  | YKR053C   | YPDcl2 | YPDcl3 | EtOHcl1 | EtOHcl2 | Galcl1 | YPDnc1 | YPDnc2 | YPDnc3 | YPDnc4 | EtOHnc1 | EtOHnc2 | Galnc1 | Galnc2 |
| 13 |       | YJL007C   | YPDcl2 | YPDcl3 | EtOHcl1 | EtOHcl2 | Galcl1 | YPDnc1 | YPDnc2 | YPDnc3 | YPDnc4 | EtOHnc1 | EtOHnc2 | Galnc1 | Galnc2 |
| 13 |       | YPR002C-A | YPDcl2 | YPDcl3 | EtOHcl1 | EtOHcl2 | Galcl1 | YPDnc1 | YPDnc2 | YPDnc3 | YPDnc4 | EtOHnc1 | EtOHnc2 | Galnc1 | Galnc2 |
| 13 | SWP82 | YFL049W   | YPDcl2 | YPDcl3 | EtOHcl1 | EtOHcl2 | Galcl1 | YPDnc1 | YPDnc2 | YPDnc3 | YPDnc4 | EtOHnc1 | EtOHnc2 | Galnc1 | Galnc2 |
| 13 | CIT2  | YCR005C   | YPDcl2 | YPDcl3 | EtOHcl1 | EtOHcl2 | Galcl1 | YPDnc1 | YPDnc2 | YPDnc3 | YPDnc4 | EtOHnc1 | EtOHnc2 | Galnc1 | Galnc2 |
| 13 | TSA1  | YML028W   | YPDcl2 | YPDcl3 | EtOHcl1 | EtOHcl2 | Galcl1 | YPDnc1 | YPDnc2 | YPDnc3 | YPDnc4 | EtOHnc1 | EtOHnc2 | Galnc1 | Galnc2 |
| 13 | ILS1  | YBL076C   | YPDcl2 | YPDcl3 | EtOHcl1 | EtOHcl2 | Galcl1 | YPDnc1 | YPDnc2 | YPDnc3 | YPDnc4 | EtOHnc1 | EtOHnc2 | Galnc1 | Galnc2 |
| 13 |       | YGR064W   | YPDcl2 | YPDcl3 | EtOHcl1 | EtOHcl2 | Galcl1 | YPDnc1 | YPDnc2 | YPDnc3 | YPDnc4 | EtOHnc1 | EtOHnc2 | Galnc1 | Galnc2 |
| 13 |       | YEL074W   | YPDcl2 | YPDcl3 | EtOHcl1 | EtOHcl2 | Galcl1 | YPDnc1 | YPDnc2 | YPDnc3 | YPDnc4 | EtOHnc1 | EtOHnc2 | Galnc1 | Galnc2 |
| 13 |       | YHR175W-  | YPDcl2 | YPDcl3 | EtOHcl1 | EtOHcl2 | Galcl1 | YPDnc1 | YPDnc2 | YPDnc3 | YPDnc4 | EtOHnc1 | EtOHnc2 | Galnc1 | Galnc2 |
| 13 | DMA2  | YNL116W   | YPDcl2 | YPDcl3 | EtOHcl1 | EtOHcl2 | Galcl1 | YPDnc1 | YPDnc2 | YPDnc3 | YPDnc4 | EtOHnc1 | EtOHnc2 | Galnc1 | Galnc2 |
| 13 | MAM3  | YOL060C   | YPDcl2 | YPDcl3 | EtOHcl1 | EtOHcl2 | Galcl1 | YPDnc1 | YPDnc2 | YPDnc3 | YPDnc4 | EtOHnc1 | EtOHnc2 | Galnc1 | Galnc2 |
| 13 | DOT5  | YIL010W   | YPDcl2 | YPDcl3 | EtOHcl1 | EtOHcl2 | Galcl1 | YPDnc1 | YPDnc2 | YPDnc3 | YPDnc4 | EtOHnc1 | EtOHnc2 | Galnc1 | Galnc2 |
| 13 | PSH1  | YOL054W   | YPDcl2 | YPDcl3 | EtOHcl1 | EtOHcl2 | Galcl1 | YPDnc1 | YPDnc2 | YPDnc3 | YPDnc4 | EtOHnc1 | EtOHnc2 | Galnc1 | Galnc2 |
| 13 |       | YML094C-A | YPDcl2 | YPDcl3 | EtOHcl1 | EtOHcl2 | Galcl1 | YPDnc1 | YPDnc2 | YPDnc3 | YPDnc4 | EtOHnc1 | EtOHnc2 | Galnc1 | Galnc2 |
| 13 | LYS5  | YGL154C   | YPDcl2 | YPDcl3 | EtOHcl1 | EtOHcl2 | Galcl1 | YPDnc1 | YPDnc2 | YPDnc3 | YPDnc4 | EtOHnc1 | EtOHnc2 | Galnc1 | Galnc2 |
| 13 | MDM38 | YOL027C   | YPDcl2 | YPDcl3 | EtOHcl1 | EtOHcl2 | Galcl1 | YPDnc1 | YPDnc2 | YPDnc3 | YPDnc4 | EtOHnc1 | EtOHnc2 | Galnc1 | Galnc2 |
| 13 | UTP15 | YMR093W   | YPDcl2 | YPDcl3 | EtOHcl1 | EtOHcl2 | Galcl1 | YPDnc1 | YPDnc2 | YPDnc3 | YPDnc4 | EtOHnc1 | EtOHnc2 | Galnc1 | Galnc2 |
| 13 | HXT8  | YJL214W   | YPDcl2 | YPDcl3 | EtOHcl1 | EtOHcl2 | Galcl1 | YPDnc1 | YPDnc2 | YPDnc3 | YPDnc4 | EtOHnc1 | EtOHnc2 | Galnc1 | Galnc2 |
| 13 | NUC1  | YJL208C   | YPDcl2 | YPDcl3 | EtOHcl1 | EtOHcl2 | Galcl1 | YPDnc1 | YPDnc2 | YPDnc3 | YPDnc4 | EtOHnc1 | EtOHnc2 | Galnc1 | Galnc2 |
| 13 |       | YIL161W   | YPDcl2 | YPDcl3 | EtOHcl1 | EtOHcl2 | Galcl1 | YPDnc1 | YPDnc2 | YPDnc3 | YPDnc4 | EtOHnc1 | EtOHnc2 | Galnc1 | Galnc2 |
| 13 | BMH1  | YER177W   | YPDcl2 | YPDcl3 | EtOHcl1 | EtOHcl2 | Galcl1 | YPDnc1 | YPDnc2 | YPDnc3 | YPDnc4 | EtOHnc1 | EtOHnc2 | Galnc1 | Galnc2 |
| 13 | MYO4  | YAL029C   | YPDcl2 | YPDcl3 | EtOHcl1 | EtOHcl2 | Galcl1 | YPDnc1 | YPDnc2 | YPDnc3 | YPDnc4 | EtOHnc1 | EtOHnc2 | Galnc1 | Galnc2 |
| 13 |       | YHR028W-  | YPDcl2 | YPDcl3 | EtOHcl1 | EtOHcl2 | Galcl1 | YPDnc1 | YPDnc2 | YPDnc3 | YPDnc4 | EtOHnc1 | EtOHnc2 | Galnc1 | Galnc2 |
| 13 | SAM50 | YNL026W   | YPDcl2 | YPDcl3 | EtOHcl1 | EtOHcl2 | Galcl1 | YPDnc1 | YPDnc2 | YPDnc3 | YPDnc4 | EtOHnc1 | EtOHnc2 | Galnc1 | Galnc2 |
| 13 | HDA3  | YPR179C   | YPDcl2 | YPDcl3 | EtOHcl1 | EtOHcl2 | Galcl1 | YPDnc1 | YPDnc2 | YPDnc3 | YPDnc4 | EtOHnc1 | EtOHnc2 | Galnc1 | Galnc2 |
| 13 | ISC1  | YER019W   | YPDcl2 | YPDcl3 | EtOHcl1 | EtOHcl2 | Galcl1 | YPDnc1 | YPDnc2 | YPDnc3 | YPDnc4 | EtOHnc1 | EtOHnc2 | Galnc1 | Galnc2 |

|           |           |        |        |         |         |        |        |        |        |        |         |         |        |        |
|-----------|-----------|--------|--------|---------|---------|--------|--------|--------|--------|--------|---------|---------|--------|--------|
| 13 BRE2   | YLR015W   | YPDcl2 | YPDcl3 | EtOHcl1 | EtOHcl2 | Galcl1 | YPDnc1 | YPDnc2 | YPDnc3 | YPDnc4 | EtOHnc1 | EtOHnc2 | Galnc1 | Galnc2 |
| 13        | YDL009C   | YPDcl2 | YPDcl3 | EtOHcl1 | EtOHcl2 | Galcl1 | YPDnc1 | YPDnc2 | YPDnc3 | YPDnc4 | EtOHnc1 | EtOHnc2 | Galnc1 | Galnc2 |
| 13        | YIL091C   | YPDcl2 | YPDcl3 | EtOHcl1 | EtOHcl2 | Galcl1 | YPDnc1 | YPDnc2 | YPDnc3 | YPDnc4 | EtOHnc1 | EtOHnc2 | Galnc1 | Galnc2 |
| 13        | YGL230C   | YPDcl2 | YPDcl3 | EtOHcl1 | EtOHcl2 | Galcl1 | YPDnc1 | YPDnc2 | YPDnc3 | YPDnc4 | EtOHnc1 | EtOHnc2 | Galnc1 | Galnc2 |
| 13        | YLR311C   | YPDcl2 | YPDcl3 | EtOHcl1 | EtOHcl2 | Galcl1 | YPDnc1 | YPDnc2 | YPDnc3 | YPDnc4 | EtOHnc1 | EtOHnc2 | Galnc1 | Galnc2 |
| 13 PRS3   | YHL011C   | YPDcl2 | YPDcl3 | EtOHcl1 | EtOHcl2 | Galcl1 | YPDnc1 | YPDnc2 | YPDnc3 | YPDnc4 | EtOHnc1 | EtOHnc2 | Galnc1 | Galnc2 |
| 13 DET1   | YDR051C   | YPDcl2 | YPDcl3 | EtOHcl1 | EtOHcl2 | Galcl1 | YPDnc1 | YPDnc2 | YPDnc3 | YPDnc4 | EtOHnc1 | EtOHnc2 | Galnc1 | Galnc2 |
| 13 MRS6   | YOR370C   | YPDcl2 | YPDcl3 | EtOHcl1 | EtOHcl2 | Galcl1 | YPDnc1 | YPDnc2 | YPDnc3 | YPDnc4 | EtOHnc1 | EtOHnc2 | Galnc1 | Galnc2 |
| 13 NCB2   | YDR397C   | YPDcl2 | YPDcl3 | EtOHcl1 | EtOHcl2 | Galcl1 | YPDnc1 | YPDnc2 | YPDnc3 | YPDnc4 | EtOHnc1 | EtOHnc2 | Galnc1 | Galnc2 |
| 13 CBP6   | YBR120C   | YPDcl2 | YPDcl3 | EtOHcl1 | EtOHcl2 | Galcl1 | YPDnc1 | YPDnc2 | YPDnc3 | YPDnc4 | EtOHnc1 | EtOHnc2 | Galnc1 | Galnc2 |
| 13        | YMR084W   | YPDcl2 | YPDcl3 | EtOHcl1 | EtOHcl2 | Galcl1 | YPDnc1 | YPDnc2 | YPDnc3 | YPDnc4 | EtOHnc1 | EtOHnc2 | Galnc1 | Galnc2 |
| 13        | YHR210C   | YPDcl2 | YPDcl3 | EtOHcl1 | EtOHcl2 | Galcl1 | YPDnc1 | YPDnc2 | YPDnc3 | YPDnc4 | EtOHnc1 | EtOHnc2 | Galnc1 | Galnc2 |
| 13 TAF1   | YGR274C   | YPDcl2 | YPDcl3 | EtOHcl1 | EtOHcl2 | Galcl1 | YPDnc1 | YPDnc2 | YPDnc3 | YPDnc4 | EtOHnc1 | EtOHnc2 | Galnc1 | Galnc2 |
| 13 BLM10  | YFL007W   | YPDcl2 | YPDcl3 | EtOHcl1 | EtOHcl2 | Galcl1 | YPDnc1 | YPDnc2 | YPDnc3 | YPDnc4 | EtOHnc1 | EtOHnc2 | Galnc1 | Galnc2 |
| 13 ATG13  | YPR185W   | YPDcl2 | YPDcl3 | EtOHcl1 | EtOHcl2 | Galcl1 | YPDnc1 | YPDnc2 | YPDnc3 | YPDnc4 | EtOHnc1 | EtOHnc2 | Galnc1 | Galnc2 |
| 13 PXR1   | YGR280C   | YPDcl2 | YPDcl3 | EtOHcl1 | EtOHcl2 | Galcl1 | YPDnc1 | YPDnc2 | YPDnc3 | YPDnc4 | EtOHnc1 | EtOHnc2 | Galnc1 | Galnc2 |
| 13 TAF8   | YML114C   | YPDcl2 | YPDcl3 | EtOHcl1 | EtOHcl2 | Galcl1 | YPDnc1 | YPDnc2 | YPDnc3 | YPDnc4 | EtOHnc1 | EtOHnc2 | Galnc1 | Galnc2 |
| 13 MAP1   | YLR244C   | YPDcl2 | YPDcl3 | EtOHcl1 | EtOHcl2 | Galcl1 | YPDnc1 | YPDnc2 | YPDnc3 | YPDnc4 | EtOHnc1 | EtOHnc2 | Galnc1 | Galnc2 |
| 13 REC102 | YLR329W   | YPDcl2 | YPDcl3 | EtOHcl1 | EtOHcl2 | Galcl1 | YPDnc1 | YPDnc2 | YPDnc3 | YPDnc4 | EtOHnc1 | EtOHnc2 | Galnc1 | Galnc2 |
| 13        | YFR056C   | YPDcl2 | YPDcl3 | EtOHcl1 | EtOHcl2 | Galcl1 | YPDnc1 | YPDnc2 | YPDnc3 | YPDnc4 | EtOHnc1 | EtOHnc2 | Galnc1 | Galnc2 |
| 13 SGN1   | YIR001C   | YPDcl2 | YPDcl3 | EtOHcl1 | EtOHcl2 | Galcl1 | YPDnc1 | YPDnc2 | YPDnc3 | YPDnc4 | EtOHnc1 | EtOHnc2 | Galnc1 | Galnc2 |
| 13 ASP1   | YDR321W   | YPDcl2 | YPDcl3 | EtOHcl1 | EtOHcl2 | Galcl1 | YPDnc1 | YPDnc2 | YPDnc3 | YPDnc4 | EtOHnc1 | EtOHnc2 | Galnc1 | Galnc2 |
| 13 SPO21  | YOL091W   | YPDcl2 | YPDcl3 | EtOHcl1 | EtOHcl2 | Galcl1 | YPDnc1 | YPDnc2 | YPDnc3 | YPDnc4 | EtOHnc1 | EtOHnc2 | Galnc1 | Galnc2 |
| 13        | YNL170W   | YPDcl2 | YPDcl3 | EtOHcl1 | EtOHcl2 | Galcl1 | YPDnc1 | YPDnc2 | YPDnc3 | YPDnc4 | EtOHnc1 | EtOHnc2 | Galnc1 | Galnc2 |
| 13 TUB2   | YFL037W   | YPDcl2 | YPDcl3 | EtOHcl1 | EtOHcl2 | Galcl1 | YPDnc1 | YPDnc2 | YPDnc3 | YPDnc4 | EtOHnc1 | EtOHnc2 | Galnc1 | Galnc2 |
| 13 UTH1   | YKR042W   | YPDcl2 | YPDcl3 | EtOHcl1 | EtOHcl2 | Galcl1 | YPDnc1 | YPDnc2 | YPDnc3 | YPDnc4 | EtOHnc1 | EtOHnc2 | Galnc1 | Galnc2 |
| 13        | YGL123C-A | YPDcl2 | YPDcl3 | EtOHcl1 | EtOHcl2 | Galcl1 | YPDnc1 | YPDnc2 | YPDnc3 | YPDnc4 | EtOHnc1 | EtOHnc2 | Galnc1 | Galnc2 |
| 13 ERF2   | YLR246W   | YPDcl2 | YPDcl3 | EtOHcl1 | EtOHcl2 | Galcl1 | YPDnc1 | YPDnc2 | YPDnc3 | YPDnc4 | EtOHnc1 | EtOHnc2 | Galnc1 | Galnc2 |
| 13        | YDR169C-A | YPDcl2 | YPDcl3 | EtOHcl1 | EtOHcl2 | Galcl1 | YPDnc1 | YPDnc2 | YPDnc3 | YPDnc4 | EtOHnc1 | EtOHnc2 | Galnc1 | Galnc2 |
| 13 PUP1   | YOR157C   | YPDcl2 | YPDcl3 | EtOHcl1 | EtOHcl2 | Galcl1 | YPDnc1 | YPDnc2 | YPDnc3 | YPDnc4 | EtOHnc1 | EtOHnc2 | Galnc1 | Galnc2 |
| 13 OST6   | YML019W   | YPDcl2 | YPDcl3 | EtOHcl1 | EtOHcl2 | Galcl1 | YPDnc1 | YPDnc2 | YPDnc3 | YPDnc4 | EtOHnc1 | EtOHnc2 | Galnc1 | Galnc2 |
| 13 TCA17  | YEL048C   | YPDcl2 | YPDcl3 | EtOHcl1 | EtOHcl2 | Galcl1 | YPDnc1 | YPDnc2 | YPDnc3 | YPDnc4 | EtOHnc1 | EtOHnc2 | Galnc1 | Galnc2 |
| 13 PET112 | YBL080C   | YPDcl2 | YPDcl3 | EtOHcl1 | EtOHcl2 | Galcl1 | YPDnc1 | YPDnc2 | YPDnc3 | YPDnc4 | EtOHnc1 | EtOHnc2 | Galnc1 | Galnc2 |
| 13        | YMR182W   | YPDcl2 | YPDcl3 | EtOHcl1 | EtOHcl2 | Galcl1 | YPDnc1 | YPDnc2 | YPDnc3 | YPDnc4 | EtOHnc1 | EtOHnc2 | Galnc1 | Galnc2 |

|           |          |        |        |         |         |        |        |        |        |        |         |         |        |        |
|-----------|----------|--------|--------|---------|---------|--------|--------|--------|--------|--------|---------|---------|--------|--------|
| 13 GAL4   | YPL248C  | YPDcl2 | YPDcl3 | EtOHcl1 | EtOHcl2 | Galcl1 | YPDnc1 | YPDnc2 | YPDnc3 | YPDnc4 | EtOHnc1 | EtOHnc2 | Galnc1 | Galnc2 |
| 13 CHZ1   | YER030W  | YPDcl2 | YPDcl3 | EtOHcl1 | EtOHcl2 | Galcl1 | YPDnc1 | YPDnc2 | YPDnc3 | YPDnc4 | EtOHnc1 | EtOHnc2 | Galnc1 | Galnc2 |
| 13 GAL83  | YER027C  | YPDcl2 | YPDcl3 | EtOHcl1 | EtOHcl2 | Galcl1 | YPDnc1 | YPDnc2 | YPDnc3 | YPDnc4 | EtOHnc1 | EtOHnc2 | Galnc1 | Galnc2 |
| 13        | YER175W- | YPDcl2 | YPDcl3 | EtOHcl1 | EtOHcl2 | Galcl1 | YPDnc1 | YPDnc2 | YPDnc3 | YPDnc4 | EtOHnc1 | EtOHnc2 | Galnc1 | Galnc2 |
| 13 LOC1   | YFR001W  | YPDcl2 | YPDcl3 | EtOHcl1 | EtOHcl2 | Galcl1 | YPDnc1 | YPDnc2 | YPDnc3 | YPDnc4 | EtOHnc1 | EtOHnc2 | Galnc1 | Galnc2 |
| 13        | YDL242W  | YPDcl2 | YPDcl3 | EtOHcl1 | EtOHcl2 | Galcl1 | YPDnc1 | YPDnc2 | YPDnc3 | YPDnc4 | EtOHnc1 | EtOHnc2 | Galnc1 | Galnc2 |
| 13 RPN2   | YIL075C  | YPDcl2 | YPDcl3 | EtOHcl1 | EtOHcl2 | Galcl1 | YPDnc1 | YPDnc2 | YPDnc3 | YPDnc4 | EtOHnc1 | EtOHnc2 | Galnc1 | Galnc2 |
| 13 PAM16  | YJL104W  | YPDcl2 | YPDcl3 | EtOHcl1 | EtOHcl2 | Galcl1 | YPDnc1 | YPDnc2 | YPDnc3 | YPDnc4 | EtOHnc1 | EtOHnc2 | Galnc1 | Galnc2 |
| 13 MCM6   | YGL201C  | YPDcl2 | YPDcl3 | EtOHcl1 | EtOHcl2 | Galcl1 | YPDnc1 | YPDnc2 | YPDnc3 | YPDnc4 | EtOHnc1 | EtOHnc2 | Galnc1 | Galnc2 |
| 13 MRPS35 | YGR165W  | YPDcl2 | YPDcl3 | EtOHcl1 | EtOHcl2 | Galcl1 | YPDnc1 | YPDnc2 | YPDnc3 | YPDnc4 | EtOHnc1 | EtOHnc2 | Galnc1 | Galnc2 |
| 13 RPL31A | YDL075W  | YPDcl2 | YPDcl3 | EtOHcl1 | EtOHcl2 | Galcl1 | YPDnc1 | YPDnc2 | YPDnc3 | YPDnc4 | EtOHnc1 | EtOHnc2 | Galnc1 | Galnc2 |
| 13 TLG1   | YDR468C  | YPDcl2 | YPDcl3 | EtOHcl1 | EtOHcl2 | Galcl1 | YPDnc1 | YPDnc2 | YPDnc3 | YPDnc4 | EtOHnc1 | EtOHnc2 | Galnc1 | Galnc2 |
| 13 IMG1   | YCR046C  | YPDcl2 | YPDcl3 | EtOHcl1 | EtOHcl2 | Galcl1 | YPDnc1 | YPDnc2 | YPDnc3 | YPDnc4 | EtOHnc1 | EtOHnc2 | Galnc1 | Galnc2 |
| 13 CYC7   | YEL039C  | YPDcl2 | YPDcl3 | EtOHcl1 | EtOHcl2 | Galcl1 | YPDnc1 | YPDnc2 | YPDnc3 | YPDnc4 | EtOHnc1 | EtOHnc2 | Galnc1 | Galnc2 |
| 13        | YDL144C  | YPDcl2 | YPDcl3 | EtOHcl1 | EtOHcl2 | Galcl1 | YPDnc1 | YPDnc2 | YPDnc3 | YPDnc4 | EtOHnc1 | EtOHnc2 | Galnc1 | Galnc2 |
| 13 BRR6   | YGL247W  | YPDcl2 | YPDcl3 | EtOHcl1 | EtOHcl2 | Galcl1 | YPDnc1 | YPDnc2 | YPDnc3 | YPDnc4 | EtOHnc1 | EtOHnc2 | Galnc1 | Galnc2 |
| 13 VPS27  | YNR006W  | YPDcl2 | YPDcl3 | EtOHcl1 | EtOHcl2 | Galcl1 | YPDnc1 | YPDnc2 | YPDnc3 | YPDnc4 | EtOHnc1 | EtOHnc2 | Galnc1 | Galnc2 |
| 13 RPL16A | YIL133C  | YPDcl2 | YPDcl3 | EtOHcl1 | EtOHcl2 | Galcl1 | YPDnc1 | YPDnc2 | YPDnc3 | YPDnc4 | EtOHnc1 | EtOHnc2 | Galnc1 | Galnc2 |
| 13 NAF1   | YNL124W  | YPDcl2 | YPDcl3 | EtOHcl1 | EtOHcl2 | Galcl1 | YPDnc1 | YPDnc2 | YPDnc3 | YPDnc4 | EtOHnc1 | EtOHnc2 | Galnc1 | Galnc2 |
| 13 TTI2   | YJR136C  | YPDcl2 | YPDcl3 | EtOHcl1 | EtOHcl2 | Galcl1 | YPDnc1 | YPDnc2 | YPDnc3 | YPDnc4 | EtOHnc1 | EtOHnc2 | Galnc1 | Galnc2 |
| 13        | YJR079W  | YPDcl2 | YPDcl3 | EtOHcl1 | EtOHcl2 | Galcl1 | YPDnc1 | YPDnc2 | YPDnc3 | YPDnc4 | EtOHnc1 | EtOHnc2 | Galnc1 | Galnc2 |
| 13        | YDL158C  | YPDcl2 | YPDcl3 | EtOHcl1 | EtOHcl2 | Galcl1 | YPDnc1 | YPDnc2 | YPDnc3 | YPDnc4 | EtOHnc1 | EtOHnc2 | Galnc1 | Galnc2 |
| 13 FPK1   | YNR047W  | YPDcl2 | YPDcl3 | EtOHcl1 | EtOHcl2 | Galcl1 | YPDnc1 | YPDnc2 | YPDnc3 | YPDnc4 | EtOHnc1 | EtOHnc2 | Galnc1 | Galnc2 |
| 13 EPT1   | YHR123W  | YPDcl2 | YPDcl3 | EtOHcl1 | EtOHcl2 | Galcl1 | YPDnc1 | YPDnc2 | YPDnc3 | YPDnc4 | EtOHnc1 | EtOHnc2 | Galnc1 | Galnc2 |
| 13        | YIL092W  | YPDcl2 | YPDcl3 | EtOHcl1 | EtOHcl2 | Galcl1 | YPDnc1 | YPDnc2 | YPDnc3 | YPDnc4 | EtOHnc1 | EtOHnc2 | Galnc1 | Galnc2 |
| 13 BNA1   | YJR025C  | YPDcl2 | YPDcl3 | EtOHcl1 | EtOHcl2 | Galcl1 | YPDnc1 | YPDnc2 | YPDnc3 | YPDnc4 | EtOHnc1 | EtOHnc2 | Galnc1 | Galnc2 |
| 13 HTB2   | YBL002W  | YPDcl2 | YPDcl3 | EtOHcl1 | EtOHcl2 | Galcl1 | YPDnc1 | YPDnc2 | YPDnc3 | YPDnc4 | EtOHnc1 | EtOHnc2 | Galnc1 | Galnc2 |
| 13 SWI1   | YPL016W  | YPDcl2 | YPDcl3 | EtOHcl1 | EtOHcl2 | Galcl1 | YPDnc1 | YPDnc2 | YPDnc3 | YPDnc4 | EtOHnc1 | EtOHnc2 | Galnc1 | Galnc2 |
| 13 ETP1   | YHL010C  | YPDcl2 | YPDcl3 | EtOHcl1 | EtOHcl2 | Galcl1 | YPDnc1 | YPDnc2 | YPDnc3 | YPDnc4 | EtOHnc1 | EtOHnc2 | Galnc1 | Galnc2 |
| 13 MED4   | YOR174W  | YPDcl2 | YPDcl3 | EtOHcl1 | EtOHcl2 | Galcl1 | YPDnc1 | YPDnc2 | YPDnc3 | YPDnc4 | EtOHnc1 | EtOHnc2 | Galnc1 | Galnc2 |
| 13 THI80  | YOR143C  | YPDcl2 | YPDcl3 | EtOHcl1 | EtOHcl2 | Galcl1 | YPDnc1 | YPDnc2 | YPDnc3 | YPDnc4 | EtOHnc1 | EtOHnc2 | Galnc1 | Galnc2 |
| 13 GLO3   | YER122C  | YPDcl2 | YPDcl3 | EtOHcl1 | EtOHcl2 | Galcl1 | YPDnc1 | YPDnc2 | YPDnc3 | YPDnc4 | EtOHnc1 | EtOHnc2 | Galnc1 | Galnc2 |
| 13        | YLL032C  | YPDcl2 | YPDcl3 | EtOHcl1 | EtOHcl2 | Galcl1 | YPDnc1 | YPDnc2 | YPDnc3 | YPDnc4 | EtOHnc1 | EtOHnc2 | Galnc1 | Galnc2 |
| 13 ATC1   | YDR184C  | YPDcl2 | YPDcl3 | EtOHcl1 | EtOHcl2 | Galcl1 | YPDnc1 | YPDnc2 | YPDnc3 | YPDnc4 | EtOHnc1 | EtOHnc2 | Galnc1 | Galnc2 |

|    |        |         |        |        |         |         |        |        |        |        |        |         |         |        |        |
|----|--------|---------|--------|--------|---------|---------|--------|--------|--------|--------|--------|---------|---------|--------|--------|
| 13 | ERS1   | YCR075C | YPDcl2 | YPDcl3 | EtOHcl1 | EtOHcl2 | Galcl1 | YPDnc1 | YPDnc2 | YPDnc3 | YPDnc4 | EtOHnc1 | EtOHnc2 | Galnc1 | Galnc2 |
| 13 | MRPL6  | YHR147C | YPDcl2 | YPDcl3 | EtOHcl1 | EtOHcl2 | Galcl1 | YPDnc1 | YPDnc2 | YPDnc3 | YPDnc4 | EtOHnc1 | EtOHnc2 | Galnc1 | Galnc2 |
| 13 |        | YPR012W | YPDcl2 | YPDcl3 | EtOHcl1 | EtOHcl2 | Galcl1 | YPDnc1 | YPDnc2 | YPDnc3 | YPDnc4 | EtOHnc1 | EtOHnc2 | Galnc1 | Galnc2 |
| 13 | MOG1   | YJR074W | YPDcl2 | YPDcl3 | EtOHcl1 | EtOHcl2 | Galcl1 | YPDnc1 | YPDnc2 | YPDnc3 | YPDnc4 | EtOHnc1 | EtOHnc2 | Galnc1 | Galnc2 |
| 13 |        | YPL162C | YPDcl2 | YPDcl3 | EtOHcl1 | EtOHcl2 | Galcl1 | YPDnc1 | YPDnc2 | YPDnc3 | YPDnc4 | EtOHnc1 | EtOHnc2 | Galnc1 | Galnc2 |
| 13 | RAT1   | YOR048C | YPDcl2 | YPDcl3 | EtOHcl1 | EtOHcl2 | Galcl1 | YPDnc1 | YPDnc2 | YPDnc3 | YPDnc4 | EtOHnc1 | EtOHnc2 | Galnc1 | Galnc2 |
| 13 |        | YNL295W | YPDcl2 | YPDcl3 | EtOHcl1 | EtOHcl2 | Galcl1 | YPDnc1 | YPDnc2 | YPDnc3 | YPDnc4 | EtOHnc1 | EtOHnc2 | Galnc1 | Galnc2 |
| 13 |        | YHL041W | YPDcl2 | YPDcl3 | EtOHcl1 | EtOHcl2 | Galcl1 | YPDnc1 | YPDnc2 | YPDnc3 | YPDnc4 | EtOHnc1 | EtOHnc2 | Galnc1 | Galnc2 |
| 13 | QRI5   | YLR204W | YPDcl2 | YPDcl3 | EtOHcl1 | EtOHcl2 | Galcl1 | YPDnc1 | YPDnc2 | YPDnc3 | YPDnc4 | EtOHnc1 | EtOHnc2 | Galnc1 | Galnc2 |
| 13 | THR1   | YHR025W | YPDcl2 | YPDcl3 | EtOHcl1 | EtOHcl2 | Galcl1 | YPDnc1 | YPDnc2 | YPDnc3 | YPDnc4 | EtOHnc1 | EtOHnc2 | Galnc1 | Galnc2 |
| 13 | RTC4   | YNL254C | YPDcl2 | YPDcl3 | EtOHcl1 | EtOHcl2 | Galcl1 | YPDnc1 | YPDnc2 | YPDnc3 | YPDnc4 | EtOHnc1 | EtOHnc2 | Galnc1 | Galnc2 |
| 13 | AGP2   | YBR132C | YPDcl2 | YPDcl3 | EtOHcl1 | EtOHcl2 | Galcl1 | YPDnc1 | YPDnc2 | YPDnc3 | YPDnc4 | EtOHnc1 | EtOHnc2 | Galnc1 | Galnc2 |
| 13 | CEF1   | YMR213W | YPDcl2 | YPDcl3 | EtOHcl1 | EtOHcl2 | Galcl1 | YPDnc1 | YPDnc2 | YPDnc3 | YPDnc4 | EtOHnc1 | EtOHnc2 | Galnc1 | Galnc2 |
| 13 | GCD6   | YDR211W | YPDcl2 | YPDcl3 | EtOHcl1 | EtOHcl2 | Galcl1 | YPDnc1 | YPDnc2 | YPDnc3 | YPDnc4 | EtOHnc1 | EtOHnc2 | Galnc1 | Galnc2 |
| 13 | HSF1   | YGL073W | YPDcl2 | YPDcl3 | EtOHcl1 | EtOHcl2 | Galcl1 | YPDnc1 | YPDnc2 | YPDnc3 | YPDnc4 | EtOHnc1 | EtOHnc2 | Galnc1 | Galnc2 |
| 13 | MRPL13 | YKR006C | YPDcl2 | YPDcl3 | EtOHcl1 | EtOHcl2 | Galcl1 | YPDnc1 | YPDnc2 | YPDnc3 | YPDnc4 | EtOHnc1 | EtOHnc2 | Galnc1 | Galnc2 |
| 13 | ATP15  | YPL271W | YPDcl2 | YPDcl3 | EtOHcl1 | EtOHcl2 | Galcl1 | YPDnc1 | YPDnc2 | YPDnc3 | YPDnc4 | EtOHnc1 | EtOHnc2 | Galnc1 | Galnc2 |
| 13 |        | YDR370C | YPDcl2 | YPDcl3 | EtOHcl1 | EtOHcl2 | Galcl1 | YPDnc1 | YPDnc2 | YPDnc3 | YPDnc4 | EtOHnc1 | EtOHnc2 | Galnc1 | Galnc2 |
| 13 | FAA2   | YER015W | YPDcl2 | YPDcl3 | EtOHcl1 | EtOHcl2 | Galcl1 | YPDnc1 | YPDnc2 | YPDnc3 | YPDnc4 | EtOHnc1 | EtOHnc2 | Galnc1 | Galnc2 |
| 13 | LGE1   | YPL055C | YPDcl2 | YPDcl3 | EtOHcl1 | EtOHcl2 | Galcl1 | YPDnc1 | YPDnc2 | YPDnc3 | YPDnc4 | EtOHnc1 | EtOHnc2 | Galnc1 | Galnc2 |
| 13 | GPI8   | YDR331W | YPDcl2 | YPDcl3 | EtOHcl1 | EtOHcl2 | Galcl1 | YPDnc1 | YPDnc2 | YPDnc3 | YPDnc4 | EtOHnc1 | EtOHnc2 | Galnc1 | Galnc2 |
| 13 | SNU56  | YDR240C | YPDcl2 | YPDcl3 | EtOHcl1 | EtOHcl2 | Galcl1 | YPDnc1 | YPDnc2 | YPDnc3 | YPDnc4 | EtOHnc1 | EtOHnc2 | Galnc1 | Galnc2 |
| 13 |        | YCL042W | YPDcl2 | YPDcl3 | EtOHcl1 | EtOHcl2 | Galcl1 | YPDnc1 | YPDnc2 | YPDnc3 | YPDnc4 | EtOHnc1 | EtOHnc2 | Galnc1 | Galnc2 |
| 13 | AIM6   | YDL237W | YPDcl2 | YPDcl3 | EtOHcl1 | EtOHcl2 | Galcl1 | YPDnc1 | YPDnc2 | YPDnc3 | YPDnc4 | EtOHnc1 | EtOHnc2 | Galnc1 | Galnc2 |
| 13 | FRA1   | YLL029W | YPDcl2 | YPDcl3 | EtOHcl1 | EtOHcl2 | Galcl1 | YPDnc1 | YPDnc2 | YPDnc3 | YPDnc4 | EtOHnc1 | EtOHnc2 | Galnc1 | Galnc2 |
| 13 |        | YJL163C | YPDcl2 | YPDcl3 | EtOHcl1 | EtOHcl2 | Galcl1 | YPDnc1 | YPDnc2 | YPDnc3 | YPDnc4 | EtOHnc1 | EtOHnc2 | Galnc1 | Galnc2 |
| 13 | TRS20  | YBR254C | YPDcl2 | YPDcl3 | EtOHcl1 | EtOHcl2 | Galcl1 | YPDnc1 | YPDnc2 | YPDnc3 | YPDnc4 | EtOHnc1 | EtOHnc2 | Galnc1 | Galnc2 |
| 13 | RPS11A | YDR025W | YPDcl2 | YPDcl3 | EtOHcl1 | EtOHcl2 | Galcl1 | YPDnc1 | YPDnc2 | YPDnc3 | YPDnc4 | EtOHnc1 | EtOHnc2 | Galnc1 | Galnc2 |
| 13 | POR1   | YNL055C | YPDcl2 | YPDcl3 | EtOHcl1 | EtOHcl2 | Galcl1 | YPDnc1 | YPDnc2 | YPDnc3 | YPDnc4 | EtOHnc1 | EtOHnc2 | Galnc1 | Galnc2 |
| 13 | ARP9   | YMR033W | YPDcl2 | YPDcl3 | EtOHcl1 | EtOHcl2 | Galcl1 | YPDnc1 | YPDnc2 | YPDnc3 | YPDnc4 | EtOHnc1 | EtOHnc2 | Galnc1 | Galnc2 |
| 13 | FIG1   | YBR040W | YPDcl2 | YPDcl3 | EtOHcl1 | EtOHcl2 | Galcl1 | YPDnc1 | YPDnc2 | YPDnc3 | YPDnc4 | EtOHnc1 | EtOHnc2 | Galnc1 | Galnc2 |
| 13 |        | YLR063W | YPDcl2 | YPDcl3 | EtOHcl1 | EtOHcl2 | Galcl1 | YPDnc1 | YPDnc2 | YPDnc3 | YPDnc4 | EtOHnc1 | EtOHnc2 | Galnc1 | Galnc2 |
| 13 |        | YJL132W | YPDcl2 | YPDcl3 | EtOHcl1 | EtOHcl2 | Galcl1 | YPDnc1 | YPDnc2 | YPDnc3 | YPDnc4 | EtOHnc1 | EtOHnc2 | Galnc1 | Galnc2 |
| 13 |        | YPR022C | YPDcl2 | YPDcl3 | EtOHcl1 | EtOHcl2 | Galcl1 | YPDnc1 | YPDnc2 | YPDnc3 | YPDnc4 | EtOHnc1 | EtOHnc2 | Galnc1 | Galnc2 |

|          |           |        |        |         |         |        |        |        |        |        |         |         |        |        |
|----------|-----------|--------|--------|---------|---------|--------|--------|--------|--------|--------|---------|---------|--------|--------|
| 13 SEC26 | YDR238C   | YPDcl2 | YPDcl3 | EtOHcl1 | EtOHcl2 | Galcl1 | YPDnc1 | YPDnc2 | YPDnc3 | YPDnc4 | EtOHnc1 | EtOHnc2 | Galnc1 | Galnc2 |
| 13 RPH1  | YER169W   | YPDcl2 | YPDcl3 | EtOHcl1 | EtOHcl2 | Galcl1 | YPDnc1 | YPDnc2 | YPDnc3 | YPDnc4 | EtOHnc1 | EtOHnc2 | Galnc1 | Galnc2 |
| 13 SEC11 | YIR022W   | YPDcl2 | YPDcl3 | EtOHcl1 | EtOHcl2 | Galcl1 | YPDnc1 | YPDnc2 | YPDnc3 | YPDnc4 | EtOHnc1 | EtOHnc2 | Galnc1 | Galnc2 |
| 13 KEL1  | YHR158C   | YPDcl2 | YPDcl3 | EtOHcl1 | EtOHcl2 | Galcl1 | YPDnc1 | YPDnc2 | YPDnc3 | YPDnc4 | EtOHnc1 | EtOHnc2 | Galnc1 | Galnc2 |
| 13       | YNL042W-1 | YPDcl2 | YPDcl3 | EtOHcl1 | EtOHcl2 | Galcl1 | YPDnc1 | YPDnc2 | YPDnc3 | YPDnc4 | EtOHnc1 | EtOHnc2 | Galnc1 | Galnc2 |
| 13       | YOR029W   | YPDcl2 | YPDcl3 | EtOHcl1 | EtOHcl2 | Galcl1 | YPDnc1 | YPDnc2 | YPDnc3 | YPDnc4 | EtOHnc1 | EtOHnc2 | Galnc1 | Galnc2 |
| 13 YKT6  | YKL196C   | YPDcl2 | YPDcl3 | EtOHcl1 | EtOHcl2 | Galcl1 | YPDnc1 | YPDnc2 | YPDnc3 | YPDnc4 | EtOHnc1 | EtOHnc2 | Galnc1 | Galnc2 |
| 13 BET3  | YKR068C   | YPDcl2 | YPDcl3 | EtOHcl1 | EtOHcl2 | Galcl1 | YPDnc1 | YPDnc2 | YPDnc3 | YPDnc4 | EtOHnc1 | EtOHnc2 | Galnc1 | Galnc2 |
| 13 ECM1  | YAL059W   | YPDcl2 | YPDcl3 | EtOHcl1 | EtOHcl2 | Galcl1 | YPDnc1 | YPDnc2 | YPDnc3 | YPDnc4 | EtOHnc1 | EtOHnc2 | Galnc1 | Galnc2 |
| 13 PEX32 | YBR168W   | YPDcl2 | YPDcl3 | EtOHcl1 | EtOHcl2 | Galcl1 | YPDnc1 | YPDnc2 | YPDnc3 | YPDnc4 | EtOHnc1 | EtOHnc2 | Galnc1 | Galnc2 |
| 13 NUM1  | YDR150W   | YPDcl2 | YPDcl3 | EtOHcl1 | EtOHcl2 | Galcl1 | YPDnc1 | YPDnc2 | YPDnc3 | YPDnc4 | EtOHnc1 | EtOHnc2 | Galnc1 | Galnc2 |
| 13       | YIL105W-A | YPDcl2 | YPDcl3 | EtOHcl1 | EtOHcl2 | Galcl1 | YPDnc1 | YPDnc2 | YPDnc3 | YPDnc4 | EtOHnc1 | EtOHnc2 | Galnc1 | Galnc2 |
| 13       | YIL134C-A | YPDcl2 | YPDcl3 | EtOHcl1 | EtOHcl2 | Galcl1 | YPDnc1 | YPDnc2 | YPDnc3 | YPDnc4 | EtOHnc1 | EtOHnc2 | Galnc1 | Galnc2 |
| 13       | YJL135W   | YPDcl2 | YPDcl3 | EtOHcl1 | EtOHcl2 | Galcl1 | YPDnc1 | YPDnc2 | YPDnc3 | YPDnc4 | EtOHnc1 | EtOHnc2 | Galnc1 | Galnc2 |
| 13 CLB2  | YPR119W   | YPDcl2 | YPDcl3 | EtOHcl1 | EtOHcl2 | Galcl1 | YPDnc1 | YPDnc2 | YPDnc3 | YPDnc4 | EtOHnc1 | EtOHnc2 | Galnc1 | Galnc2 |
| 13 UGA2  | YBR006W   | YPDcl2 | YPDcl3 | EtOHcl1 | EtOHcl2 | Galcl1 | YPDnc1 | YPDnc2 | YPDnc3 | YPDnc4 | EtOHnc1 | EtOHnc2 | Galnc1 | Galnc2 |
| 13 MRI1  | YPR118W   | YPDcl2 | YPDcl3 | EtOHcl1 | EtOHcl2 | Galcl1 | YPDnc1 | YPDnc2 | YPDnc3 | YPDnc4 | EtOHnc1 | EtOHnc2 | Galnc1 | Galnc2 |
| 13 SCT1  | YBL011W   | YPDcl2 | YPDcl3 | EtOHcl1 | EtOHcl2 | Galcl1 | YPDnc1 | YPDnc2 | YPDnc3 | YPDnc4 | EtOHnc1 | EtOHnc2 | Galnc1 | Galnc2 |
| 13 IES4  | YOR189W   | YPDcl2 | YPDcl3 | EtOHcl1 | EtOHcl2 | Galcl1 | YPDnc1 | YPDnc2 | YPDnc3 | YPDnc4 | EtOHnc1 | EtOHnc2 | Galnc1 | Galnc2 |
| 13 ESL2  | YKR096W   | YPDcl2 | YPDcl3 | EtOHcl1 | EtOHcl2 | Galcl1 | YPDnc1 | YPDnc2 | YPDnc3 | YPDnc4 | EtOHnc1 | EtOHnc2 | Galnc1 | Galnc2 |
| 13       | YDL062W   | YPDcl2 | YPDcl3 | EtOHcl1 | EtOHcl2 | Galcl1 | YPDnc1 | YPDnc2 | YPDnc3 | YPDnc4 | EtOHnc1 | EtOHnc2 | Galnc1 | Galnc2 |
| 13       | YOR015W   | YPDcl2 | YPDcl3 | EtOHcl1 | EtOHcl2 | Galcl1 | YPDnc1 | YPDnc2 | YPDnc3 | YPDnc4 | EtOHnc1 | EtOHnc2 | Galnc1 | Galnc2 |
| 13 DSS1  | YMR287C   | YPDcl2 | YPDcl3 | EtOHcl1 | EtOHcl2 | Galcl1 | YPDnc1 | YPDnc2 | YPDnc3 | YPDnc4 | EtOHnc1 | EtOHnc2 | Galnc1 | Galnc2 |
| 13 GLN3  | YER040W   | YPDcl2 | YPDcl3 | EtOHcl1 | EtOHcl2 | Galcl1 | YPDnc1 | YPDnc2 | YPDnc3 | YPDnc4 | EtOHnc1 | EtOHnc2 | Galnc1 | Galnc2 |
| 13       | YMR153C-  | YPDcl2 | YPDcl3 | EtOHcl1 | EtOHcl2 | Galcl1 | YPDnc1 | YPDnc2 | YPDnc3 | YPDnc4 | EtOHnc1 | EtOHnc2 | Galnc1 | Galnc2 |
| 13 IFH1  | YLR223C   | YPDcl2 | YPDcl3 | EtOHcl1 | EtOHcl2 | Galcl1 | YPDnc1 | YPDnc2 | YPDnc3 | YPDnc4 | EtOHnc1 | EtOHnc2 | Galnc1 | Galnc2 |
| 13 SRC1  | YML034W   | YPDcl2 | YPDcl3 | EtOHcl1 | EtOHcl2 | Galcl1 | YPDnc1 | YPDnc2 | YPDnc3 | YPDnc4 | EtOHnc1 | EtOHnc2 | Galnc1 | Galnc2 |
| 13 CLN3  | YAL040C   | YPDcl2 | YPDcl3 | EtOHcl1 | EtOHcl2 | Galcl1 | YPDnc1 | YPDnc2 | YPDnc3 | YPDnc4 | EtOHnc1 | EtOHnc2 | Galnc1 | Galnc2 |
| 13       | YHL002C-A | YPDcl2 | YPDcl3 | EtOHcl1 | EtOHcl2 | Galcl1 | YPDnc1 | YPDnc2 | YPDnc3 | YPDnc4 | EtOHnc1 | EtOHnc2 | Galnc1 | Galnc2 |
| 13 FCP1  | YMR277W   | YPDcl2 | YPDcl3 | EtOHcl1 | EtOHcl2 | Galcl1 | YPDnc1 | YPDnc2 | YPDnc3 | YPDnc4 | EtOHnc1 | EtOHnc2 | Galnc1 | Galnc2 |
| 13 ZIM17 | YNL310C   | YPDcl2 | YPDcl3 | EtOHcl1 | EtOHcl2 | Galcl1 | YPDnc1 | YPDnc2 | YPDnc3 | YPDnc4 | EtOHnc1 | EtOHnc2 | Galnc1 | Galnc2 |
| 13 PSY3  | YLR376C   | YPDcl2 | YPDcl3 | EtOHcl1 | EtOHcl2 | Galcl1 | YPDnc1 | YPDnc2 | YPDnc3 | YPDnc4 | EtOHnc1 | EtOHnc2 | Galnc1 | Galnc2 |
| 13 YNG1  | YOR064C   | YPDcl2 | YPDcl3 | EtOHcl1 | EtOHcl2 | Galcl1 | YPDnc1 | YPDnc2 | YPDnc3 | YPDnc4 | EtOHnc1 | EtOHnc2 | Galnc1 | Galnc2 |
| 13 SOD1  | YJR104C   | YPDcl2 | YPDcl3 | EtOHcl1 | EtOHcl2 | Galcl1 | YPDnc1 | YPDnc2 | YPDnc3 | YPDnc4 | EtOHnc1 | EtOHnc2 | Galnc1 | Galnc2 |



|           |           |        |        |         |         |        |        |        |        |        |         |         |        |        |
|-----------|-----------|--------|--------|---------|---------|--------|--------|--------|--------|--------|---------|---------|--------|--------|
| 13 SAM1   | YLR180W   | YPDcl2 | YPDcl3 | EtOHcl1 | EtOHcl2 | Galcl1 | YPDnc1 | YPDnc2 | YPDnc3 | YPDnc4 | EtOHnc1 | EtOHnc2 | Galnc1 | Galnc2 |
| 13 RNA15  | YGL044C   | YPDcl2 | YPDcl3 | EtOHcl1 | EtOHcl2 | Galcl1 | YPDnc1 | YPDnc2 | YPDnc3 | YPDnc4 | EtOHnc1 | EtOHnc2 | Galnc1 | Galnc2 |
| 13        | YNL276C   | YPDcl2 | YPDcl3 | EtOHcl1 | EtOHcl2 | Galcl1 | YPDnc1 | YPDnc2 | YPDnc3 | YPDnc4 | EtOHnc1 | EtOHnc2 | Galnc1 | Galnc2 |
| 13 PPH22  | YDL188C   | YPDcl2 | YPDcl3 | EtOHcl1 | EtOHcl2 | Galcl1 | YPDnc1 | YPDnc2 | YPDnc3 | YPDnc4 | EtOHnc1 | EtOHnc2 | Galnc1 | Galnc2 |
| 13        | YHR113W   | YPDcl2 | YPDcl3 | EtOHcl1 | EtOHcl2 | Galcl1 | YPDnc1 | YPDnc2 | YPDnc3 | YPDnc4 | EtOHnc1 | EtOHnc2 | Galnc1 | Galnc2 |
| 13 CDC33  | YOL139C   | YPDcl2 | YPDcl3 | EtOHcl1 | EtOHcl2 | Galcl1 | YPDnc1 | YPDnc2 | YPDnc3 | YPDnc4 | EtOHnc1 | EtOHnc2 | Galnc1 | Galnc2 |
| 13        | YHL018W   | YPDcl2 | YPDcl3 | EtOHcl1 | EtOHcl2 | Galcl1 | YPDnc1 | YPDnc2 | YPDnc3 | YPDnc4 | EtOHnc1 | EtOHnc2 | Galnc1 | Galnc2 |
| 13 IRC3   | YDR332W   | YPDcl2 | YPDcl3 | EtOHcl1 | EtOHcl2 | Galcl1 | YPDnc1 | YPDnc2 | YPDnc3 | YPDnc4 | EtOHnc1 | EtOHnc2 | Galnc1 | Galnc2 |
| 13 DPL1   | YDR294C   | YPDcl2 | YPDcl3 | EtOHcl1 | EtOHcl2 | Galcl1 | YPDnc1 | YPDnc2 | YPDnc3 | YPDnc4 | EtOHnc1 | EtOHnc2 | Galnc1 | Galnc2 |
| 13 UME6   | YDR207C   | YPDcl2 | YPDcl3 | EtOHcl1 | EtOHcl2 | Galcl1 | YPDnc1 | YPDnc2 | YPDnc3 | YPDnc4 | EtOHnc1 | EtOHnc2 | Galnc1 | Galnc2 |
| 13 YPI1   | YFR003C   | YPDcl2 | YPDcl3 | EtOHcl1 | EtOHcl2 | Galcl1 | YPDnc1 | YPDnc2 | YPDnc3 | YPDnc4 | EtOHnc1 | EtOHnc2 | Galnc1 | Galnc2 |
| 13 PRE4   | YFR050C   | YPDcl2 | YPDcl3 | EtOHcl1 | EtOHcl2 | Galcl1 | YPDnc1 | YPDnc2 | YPDnc3 | YPDnc4 | EtOHnc1 | EtOHnc2 | Galnc1 | Galnc2 |
| 13 ERG7   | YHR072W   | YPDcl2 | YPDcl3 | EtOHcl1 | EtOHcl2 | Galcl1 | YPDnc1 | YPDnc2 | YPDnc3 | YPDnc4 | EtOHnc1 | EtOHnc2 | Galnc1 | Galnc2 |
| 13 BIR1   | YJR089W   | YPDcl2 | YPDcl3 | EtOHcl1 | EtOHcl2 | Galcl1 | YPDnc1 | YPDnc2 | YPDnc3 | YPDnc4 | EtOHnc1 | EtOHnc2 | Galnc1 | Galnc2 |
| 13 ISY1   | YJR050W   | YPDcl2 | YPDcl3 | EtOHcl1 | EtOHcl2 | Galcl1 | YPDnc1 | YPDnc2 | YPDnc3 | YPDnc4 | EtOHnc1 | EtOHnc2 | Galnc1 | Galnc2 |
| 13 RIB2   | YOL066C   | YPDcl2 | YPDcl3 | EtOHcl1 | EtOHcl2 | Galcl1 | YPDnc1 | YPDnc2 | YPDnc3 | YPDnc4 | EtOHnc1 | EtOHnc2 | Galnc1 | Galnc2 |
| 13        | YLL006W-A | YPDcl2 | YPDcl3 | EtOHcl1 | EtOHcl2 | Galcl1 | YPDnc1 | YPDnc2 | YPDnc3 | YPDnc4 | EtOHnc1 | EtOHnc2 | Galnc1 | Galnc2 |
| 13 HHF2   | YNL030W   | YPDcl2 | YPDcl3 | EtOHcl1 | EtOHcl2 | Galcl1 | YPDnc1 | YPDnc2 | YPDnc3 | YPDnc4 | EtOHnc1 | EtOHnc2 | Galnc1 | Galnc2 |
| 13 RPS19B | YNL302C   | YPDcl2 | YPDcl3 | EtOHcl1 | EtOHcl2 | Galcl1 | YPDnc1 | YPDnc2 | YPDnc3 | YPDnc4 | EtOHnc1 | EtOHnc2 | Galnc1 | Galnc2 |
| 13 COX20  | YDR231C   | YPDcl2 | YPDcl3 | EtOHcl1 | EtOHcl2 | Galcl1 | YPDnc1 | YPDnc2 | YPDnc3 | YPDnc4 | EtOHnc1 | EtOHnc2 | Galnc1 | Galnc2 |
| 13        | YDR374C   | YPDcl2 | YPDcl3 | EtOHcl1 | EtOHcl2 | Galcl1 | YPDnc1 | YPDnc2 | YPDnc3 | YPDnc4 | EtOHnc1 | EtOHnc2 | Galnc1 | Galnc2 |
| 13 PEP12  | YOR036W   | YPDcl2 | YPDcl3 | EtOHcl1 | EtOHcl2 | Galcl1 | YPDnc1 | YPDnc2 | YPDnc3 | YPDnc4 | EtOHnc1 | EtOHnc2 | Galnc1 | Galnc2 |
| 13 SWF1   | YDR126W   | YPDcl2 | YPDcl3 | EtOHcl1 | EtOHcl2 | Galcl1 | YPDnc1 | YPDnc2 | YPDnc3 | YPDnc4 | EtOHnc1 | EtOHnc2 | Galnc1 | Galnc2 |
| 13 WRS1   | YOL097C   | YPDcl2 | YPDcl3 | EtOHcl1 | EtOHcl2 | Galcl1 | YPDnc1 | YPDnc2 | YPDnc3 | YPDnc4 | EtOHnc1 | EtOHnc2 | Galnc1 | Galnc2 |
| 13 NEM1   | YHR004C   | YPDcl2 | YPDcl3 | EtOHcl1 | EtOHcl2 | Galcl1 | YPDnc1 | YPDnc2 | YPDnc3 | YPDnc4 | EtOHnc1 | EtOHnc2 | Galnc1 | Galnc2 |
| 13 WHI3   | YNL197C   | YPDcl2 | YPDcl3 | EtOHcl1 | EtOHcl2 | Galcl1 | YPDnc1 | YPDnc2 | YPDnc3 | YPDnc4 | EtOHnc1 | EtOHnc2 | Galnc1 | Galnc2 |
| 13 BTT1   | YDR252W   | YPDcl2 | YPDcl3 | EtOHcl1 | EtOHcl2 | Galcl1 | YPDnc1 | YPDnc2 | YPDnc3 | YPDnc4 | EtOHnc1 | EtOHnc2 | Galnc1 | Galnc2 |
| 13        | YDR306C   | YPDcl2 | YPDcl3 | EtOHcl1 | EtOHcl2 | Galcl1 | YPDnc1 | YPDnc2 | YPDnc3 | YPDnc4 | EtOHnc1 | EtOHnc2 | Galnc1 | Galnc2 |
| 13 KRE9   | YJL174W   | YPDcl2 | YPDcl3 | EtOHcl1 | EtOHcl2 | Galcl1 | YPDnc1 | YPDnc2 | YPDnc3 | YPDnc4 | EtOHnc1 | EtOHnc2 | Galnc1 | Galnc2 |
| 13 ORM2   | YLR350W   | YPDcl2 | YPDcl3 | EtOHcl1 | EtOHcl2 | Galcl1 | YPDnc1 | YPDnc2 | YPDnc3 | YPDnc4 | EtOHnc1 | EtOHnc2 | Galnc1 | Galnc2 |
| 13 HST3   | YOR025W   | YPDcl2 | YPDcl3 | EtOHcl1 | EtOHcl2 | Galcl1 | YPDnc1 | YPDnc2 | YPDnc3 | YPDnc4 | EtOHnc1 | EtOHnc2 | Galnc1 | Galnc2 |
| 13 RUB1   | YDR139C   | YPDcl2 | YPDcl3 | EtOHcl1 | EtOHcl2 | Galcl1 | YPDnc1 | YPDnc2 | YPDnc3 | YPDnc4 | EtOHnc1 | EtOHnc2 | Galnc1 | Galnc2 |
| 13 ATF2   | YGR177C   | YPDcl2 | YPDcl3 | EtOHcl1 | EtOHcl2 | Galcl1 | YPDnc1 | YPDnc2 | YPDnc3 | YPDnc4 | EtOHnc1 | EtOHnc2 | Galnc1 | Galnc2 |
| 13        | YER134C   | YPDcl2 | YPDcl3 | EtOHcl1 | EtOHcl2 | Galcl1 | YPDnc1 | YPDnc2 | YPDnc3 | YPDnc4 | EtOHnc1 | EtOHnc2 | Galnc1 | Galnc2 |

|    |       |           |        |        |         |         |        |        |        |        |        |         |         |        |        |
|----|-------|-----------|--------|--------|---------|---------|--------|--------|--------|--------|--------|---------|---------|--------|--------|
| 13 | SSK22 | YCR073C   | YPDcl2 | YPDcl3 | EtOHcl1 | EtOHcl2 | Galcl1 | YPDnc1 | YPDnc2 | YPDnc3 | YPDnc4 | EtOHnc1 | EtOHnc2 | Galnc1 | Galnc2 |
| 13 | PBN1  | YCL052C   | YPDcl2 | YPDcl3 | EtOHcl1 | EtOHcl2 | Galcl1 | YPDnc1 | YPDnc2 | YPDnc3 | YPDnc4 | EtOHnc1 | EtOHnc2 | Galnc1 | Galnc2 |
| 13 | RMD5  | YDR255C   | YPDcl2 | YPDcl3 | EtOHcl1 | EtOHcl2 | Galcl1 | YPDnc1 | YPDnc2 | YPDnc3 | YPDnc4 | EtOHnc1 | EtOHnc2 | Galnc1 | Galnc2 |
| 13 |       | YOR379C   | YPDcl2 | YPDcl3 | EtOHcl1 | EtOHcl2 | Galcl1 | YPDnc1 | YPDnc2 | YPDnc3 | YPDnc4 | EtOHnc1 | EtOHnc2 | Galnc1 | Galnc2 |
| 13 | VNX1  | YNL321W   | YPDcl2 | YPDcl3 | EtOHcl1 | EtOHcl2 | Galcl1 | YPDnc1 | YPDnc2 | YPDnc3 | YPDnc4 | EtOHnc1 | EtOHnc2 | Galnc1 | Galnc2 |
| 13 | VPS24 | YKL041W   | YPDcl2 | YPDcl3 | EtOHcl1 | EtOHcl2 | Galcl1 | YPDnc1 | YPDnc2 | YPDnc3 | YPDnc4 | EtOHnc1 | EtOHnc2 | Galnc1 | Galnc2 |
| 13 |       | YNR042W   | YPDcl2 | YPDcl3 | EtOHcl1 | EtOHcl2 | Galcl1 | YPDnc1 | YPDnc2 | YPDnc3 | YPDnc4 | EtOHnc1 | EtOHnc2 | Galnc1 | Galnc2 |
| 13 |       | YER163C   | YPDcl2 | YPDcl3 | EtOHcl1 | EtOHcl2 | Galcl1 | YPDnc1 | YPDnc2 | YPDnc3 | YPDnc4 | EtOHnc1 | EtOHnc2 | Galnc1 | Galnc2 |
| 13 |       | YIL025C   | YPDcl2 | YPDcl3 | EtOHcl1 | EtOHcl2 | Galcl1 | YPDnc1 | YPDnc2 | YPDnc3 | YPDnc4 | EtOHnc1 | EtOHnc2 | Galnc1 | Galnc2 |
| 13 |       | YML009W   | YPDcl2 | YPDcl3 | EtOHcl1 | EtOHcl2 | Galcl1 | YPDnc1 | YPDnc2 | YPDnc3 | YPDnc4 | EtOHnc1 | EtOHnc2 | Galnc1 | Galnc2 |
| 13 | OM14  | YBR230C   | YPDcl2 | YPDcl3 | EtOHcl1 | EtOHcl2 | Galcl1 | YPDnc1 | YPDnc2 | YPDnc3 | YPDnc4 | EtOHnc1 | EtOHnc2 | Galnc1 | Galnc2 |
| 13 | DCN1  | YLR128W   | YPDcl2 | YPDcl3 | EtOHcl1 | EtOHcl2 | Galcl1 | YPDnc1 | YPDnc2 | YPDnc3 | YPDnc4 | EtOHnc1 | EtOHnc2 | Galnc1 | Galnc2 |
| 13 | RAD34 | YDR314C   | YPDcl2 | YPDcl3 | EtOHcl1 | EtOHcl2 | Galcl1 | YPDnc1 | YPDnc2 | YPDnc3 | YPDnc4 | EtOHnc1 | EtOHnc2 | Galnc1 | Galnc2 |
| 12 | SYF2  | YGR129W   | YPDcl2 | YPDcl3 | EtOHcl1 | EtOHcl2 | Galcl1 | YPDnc1 | YPDnc2 | YPDnc3 | YPDnc4 | EtOHnc1 | -       | Galnc1 | Galnc2 |
| 12 | HAA1  | YPR008W   | YPDcl2 | YPDcl3 | EtOHcl1 | -       | Galcl1 | YPDnc1 | YPDnc2 | YPDnc3 | YPDnc4 | EtOHnc1 | EtOHnc2 | Galnc1 | Galnc2 |
| 12 | ARF3  | YOR094W   | YPDcl2 | YPDcl3 | EtOHcl1 | -       | Galcl1 | YPDnc1 | YPDnc2 | YPDnc3 | YPDnc4 | EtOHnc1 | EtOHnc2 | Galnc1 | Galnc2 |
| 12 | MRP51 | YPL118W   | YPDcl2 | YPDcl3 | EtOHcl1 | EtOHcl2 | Galcl1 | -      | YPDnc2 | YPDnc3 | YPDnc4 | EtOHnc1 | EtOHnc2 | Galnc1 | Galnc2 |
| 12 |       | YBR271W   | YPDcl2 | YPDcl3 | EtOHcl1 | -       | Galcl1 | YPDnc1 | YPDnc2 | YPDnc3 | YPDnc4 | EtOHnc1 | EtOHnc2 | Galnc1 | Galnc2 |
| 12 | OCA4  | YCR095C   | YPDcl2 | YPDcl3 | EtOHcl1 | EtOHcl2 | Galcl1 | -      | YPDnc2 | YPDnc3 | YPDnc4 | EtOHnc1 | EtOHnc2 | Galnc1 | Galnc2 |
| 12 | FMP45 | YDL222C   | YPDcl2 | YPDcl3 | EtOHcl1 | EtOHcl2 | Galcl1 | YPDnc1 | YPDnc2 | YPDnc3 | YPDnc4 | -       | EtOHnc2 | Galnc1 | Galnc2 |
| 12 | HEM1  | YDR232W   | YPDcl2 | YPDcl3 | EtOHcl1 | -       | Galcl1 | YPDnc1 | YPDnc2 | YPDnc3 | YPDnc4 | EtOHnc1 | EtOHnc2 | Galnc1 | Galnc2 |
| 12 | PIB1  | YDR313C   | YPDcl2 | YPDcl3 | -       | EtOHcl2 | Galcl1 | YPDnc1 | YPDnc2 | YPDnc3 | YPDnc4 | EtOHnc1 | EtOHnc2 | Galnc1 | Galnc2 |
| 12 |       | YKL183C-A | YPDcl2 | YPDcl3 | EtOHcl1 | EtOHcl2 | Galcl1 | YPDnc1 | YPDnc2 | -      | YPDnc4 | EtOHnc1 | EtOHnc2 | Galnc1 | Galnc2 |
| 12 | FRT1  | YOR324C   | YPDcl2 | YPDcl3 | EtOHcl1 | EtOHcl2 | Galcl1 | YPDnc1 | -      | YPDnc3 | YPDnc4 | EtOHnc1 | EtOHnc2 | Galnc1 | Galnc2 |
| 12 |       | YNL134C   | YPDcl2 | YPDcl3 | EtOHcl1 | -       | Galcl1 | YPDnc1 | YPDnc2 | YPDnc3 | YPDnc4 | EtOHnc1 | EtOHnc2 | Galnc1 | Galnc2 |
| 12 | PCS60 | YBR222C   | YPDcl2 | YPDcl3 | EtOHcl1 | EtOHcl2 | Galcl1 | YPDnc1 | YPDnc2 | YPDnc3 | YPDnc4 | EtOHnc1 | -       | Galnc1 | Galnc2 |
| 12 | DYN1  | YKR054C   | YPDcl2 | YPDcl3 | EtOHcl1 | EtOHcl2 | Galcl1 | YPDnc1 | YPDnc2 | YPDnc3 | YPDnc4 | EtOHnc1 | -       | Galnc1 | Galnc2 |
| 12 |       | YKL187C   | YPDcl2 | YPDcl3 | EtOHcl1 | -       | Galcl1 | YPDnc1 | YPDnc2 | YPDnc3 | YPDnc4 | EtOHnc1 | EtOHnc2 | Galnc1 | Galnc2 |
| 12 | NKP1  | YDR383C   | -      | YPDcl3 | EtOHcl1 | EtOHcl2 | Galcl1 | YPDnc1 | YPDnc2 | YPDnc3 | YPDnc4 | EtOHnc1 | EtOHnc2 | Galnc1 | Galnc2 |
| 12 | SIP3  | YNL257C   | YPDcl2 | YPDcl3 | EtOHcl1 | -       | Galcl1 | YPDnc1 | YPDnc2 | YPDnc3 | YPDnc4 | EtOHnc1 | EtOHnc2 | Galnc1 | Galnc2 |
| 12 |       | YDR262W   | YPDcl2 | YPDcl3 | EtOHcl1 | -       | Galcl1 | YPDnc1 | YPDnc2 | YPDnc3 | YPDnc4 | EtOHnc1 | EtOHnc2 | Galnc1 | Galnc2 |
| 12 | CSN9  | YDR179C   | YPDcl2 | YPDcl3 | EtOHcl1 | EtOHcl2 | Galcl1 | YPDnc1 | YPDnc2 | YPDnc3 | YPDnc4 | EtOHnc1 | EtOHnc2 | Galnc1 | -      |
| 12 | HSP78 | YDR258C   | YPDcl2 | YPDcl3 | EtOHcl1 | EtOHcl2 | Galcl1 | YPDnc1 | YPDnc2 | YPDnc3 | YPDnc4 | EtOHnc1 | -       | Galnc1 | Galnc2 |
| 12 | MDM34 | YGL219C   | YPDcl2 | YPDcl3 | EtOHcl1 | EtOHcl2 | Galcl1 | YPDnc1 | YPDnc2 | YPDnc3 | -      | EtOHnc1 | EtOHnc2 | Galnc1 | Galnc2 |

|          |           |        |        |         |         |        |        |        |        |        |         |         |        |        |
|----------|-----------|--------|--------|---------|---------|--------|--------|--------|--------|--------|---------|---------|--------|--------|
| 12 TFS1  | YLR178C   | -      | YPDcl3 | EtOHcl1 | EtOHcl2 | Galcl1 | YPDnc1 | YPDnc2 | YPDnc3 | YPDnc4 | EtOHnc1 | EtOHnc2 | Galnc1 | Galnc2 |
| 12 SER1  | YOR184W   | YPDcl2 | YPDcl3 | EtOHcl1 | -       | Galcl1 | YPDnc1 | YPDnc2 | YPDnc3 | YPDnc4 | EtOHnc1 | EtOHnc2 | Galnc1 | Galnc2 |
| 12 COQ10 | YOL008W   | YPDcl2 | -      | EtOHcl1 | EtOHcl2 | Galcl1 | YPDnc1 | YPDnc2 | YPDnc3 | YPDnc4 | EtOHnc1 | EtOHnc2 | Galnc1 | Galnc2 |
| 12       | YGL015C   | YPDcl2 | YPDcl3 | EtOHcl1 | EtOHcl2 | Galcl1 | -      | YPDnc2 | YPDnc3 | YPDnc4 | EtOHnc1 | EtOHnc2 | Galnc1 | Galnc2 |
| 12 PEP3  | YLR148W   | YPDcl2 | YPDcl3 | EtOHcl1 | -       | Galcl1 | YPDnc1 | YPDnc2 | YPDnc3 | YPDnc4 | EtOHnc1 | EtOHnc2 | Galnc1 | Galnc2 |
| 12       | YPR097W   | YPDcl2 | YPDcl3 | -       | EtOHcl2 | Galcl1 | YPDnc1 | YPDnc2 | YPDnc3 | YPDnc4 | EtOHnc1 | EtOHnc2 | Galnc1 | Galnc2 |
| 12       | YDR379C-A | YPDcl2 | YPDcl3 | EtOHcl1 | -       | Galcl1 | YPDnc1 | YPDnc2 | YPDnc3 | YPDnc4 | EtOHnc1 | EtOHnc2 | Galnc1 | Galnc2 |
| 12       | YOL159C   | YPDcl2 | YPDcl3 | EtOHcl1 | -       | Galcl1 | YPDnc1 | YPDnc2 | YPDnc3 | YPDnc4 | EtOHnc1 | EtOHnc2 | Galnc1 | Galnc2 |
| 12 DTD1  | YDL219W   | YPDcl2 | YPDcl3 | -       | EtOHcl2 | Galcl1 | YPDnc1 | YPDnc2 | YPDnc3 | YPDnc4 | EtOHnc1 | EtOHnc2 | Galnc1 | Galnc2 |
| 12 ALD6  | YPL061W   | YPDcl2 | YPDcl3 | EtOHcl1 | EtOHcl2 | Galcl1 | YPDnc1 | YPDnc2 | YPDnc3 | YPDnc4 | -       | EtOHnc2 | Galnc1 | Galnc2 |
| 12 BNA3  | YJL060W   | YPDcl2 | YPDcl3 | EtOHcl1 | -       | Galcl1 | YPDnc1 | YPDnc2 | YPDnc3 | YPDnc4 | EtOHnc1 | EtOHnc2 | Galnc1 | Galnc2 |
| 12 GRX4  | YER174C   | -      | YPDcl3 | EtOHcl1 | EtOHcl2 | Galcl1 | YPDnc1 | YPDnc2 | YPDnc3 | YPDnc4 | EtOHnc1 | EtOHnc2 | Galnc1 | Galnc2 |
| 12 CRF1  | YDR223W   | YPDcl2 | YPDcl3 | EtOHcl1 | -       | Galcl1 | YPDnc1 | YPDnc2 | YPDnc3 | YPDnc4 | EtOHnc1 | EtOHnc2 | Galnc1 | Galnc2 |
| 12 TIF34 | YMR146C   | YPDcl2 | YPDcl3 | EtOHcl1 | EtOHcl2 | Galcl1 | YPDnc1 | YPDnc2 | YPDnc3 | YPDnc4 | EtOHnc1 | EtOHnc2 | Galnc1 | -      |
| 12 PYC1  | YGL062W   | YPDcl2 | YPDcl3 | -       | EtOHcl2 | Galcl1 | YPDnc1 | YPDnc2 | YPDnc3 | YPDnc4 | EtOHnc1 | EtOHnc2 | Galnc1 | Galnc2 |
| 12       | YIL012W   | YPDcl2 | -      | EtOHcl1 | EtOHcl2 | Galcl1 | YPDnc1 | YPDnc2 | YPDnc3 | YPDnc4 | EtOHnc1 | EtOHnc2 | Galnc1 | Galnc2 |
| 12 RSM7  | YJR113C   | YPDcl2 | YPDcl3 | EtOHcl1 | EtOHcl2 | -      | YPDnc1 | YPDnc2 | YPDnc3 | YPDnc4 | EtOHnc1 | EtOHnc2 | Galnc1 | Galnc2 |
| 12       | YOL106W   | -      | YPDcl3 | EtOHcl1 | EtOHcl2 | Galcl1 | YPDnc1 | YPDnc2 | YPDnc3 | YPDnc4 | EtOHnc1 | EtOHnc2 | Galnc1 | Galnc2 |
| 12       | YPR077C   | YPDcl2 | YPDcl3 | EtOHcl1 | -       | Galcl1 | YPDnc1 | YPDnc2 | YPDnc3 | YPDnc4 | EtOHnc1 | EtOHnc2 | Galnc1 | Galnc2 |
| 12       | YOR365C   | YPDcl2 | YPDcl3 | EtOHcl1 | EtOHcl2 | Galcl1 | -      | YPDnc2 | YPDnc3 | YPDnc4 | EtOHnc1 | EtOHnc2 | Galnc1 | Galnc2 |
| 12 DCS2  | YOR173W   | YPDcl2 | YPDcl3 | EtOHcl1 | EtOHcl2 | Galcl1 | YPDnc1 | YPDnc2 | YPDnc3 | YPDnc4 | EtOHnc1 | -       | Galnc1 | Galnc2 |
| 12 TEA1  | YOR337W   | -      | YPDcl3 | EtOHcl1 | EtOHcl2 | Galcl1 | YPDnc1 | YPDnc2 | YPDnc3 | YPDnc4 | EtOHnc1 | EtOHnc2 | Galnc1 | Galnc2 |
| 12 RLP7  | YNL002C   | YPDcl2 | YPDcl3 | EtOHcl1 | -       | Galcl1 | YPDnc1 | YPDnc2 | YPDnc3 | YPDnc4 | EtOHnc1 | EtOHnc2 | Galnc1 | Galnc2 |
| 12 OSW2  | YLR054C   | YPDcl2 | -      | EtOHcl1 | EtOHcl2 | Galcl1 | YPDnc1 | YPDnc2 | YPDnc3 | YPDnc4 | EtOHnc1 | EtOHnc2 | Galnc1 | Galnc2 |
| 12 DNL4  | YOR005C   | YPDcl2 | YPDcl3 | EtOHcl1 | EtOHcl2 | Galcl1 | YPDnc1 | YPDnc2 | YPDnc3 | YPDnc4 | EtOHnc1 | EtOHnc2 | Galnc1 | -      |
| 12       | YLR458W   | YPDcl2 | YPDcl3 | EtOHcl1 | -       | Galcl1 | YPDnc1 | YPDnc2 | YPDnc3 | YPDnc4 | EtOHnc1 | EtOHnc2 | Galnc1 | Galnc2 |
| 12 ERD2  | YBL040C   | -      | YPDcl3 | EtOHcl1 | EtOHcl2 | Galcl1 | YPDnc1 | YPDnc2 | YPDnc3 | YPDnc4 | EtOHnc1 | EtOHnc2 | Galnc1 | Galnc2 |
| 12 RSF2  | YJR127C   | YPDcl2 | YPDcl3 | EtOHcl1 | EtOHcl2 | Galcl1 | YPDnc1 | -      | YPDnc3 | YPDnc4 | EtOHnc1 | EtOHnc2 | Galnc1 | Galnc2 |
| 12 RIF2  | YLR453C   | YPDcl2 | YPDcl3 | EtOHcl1 | EtOHcl2 | Galcl1 | YPDnc1 | YPDnc2 | YPDnc3 | YPDnc4 | EtOHnc1 | -       | Galnc1 | Galnc2 |
| 12       | YCR007C   | -      | YPDcl3 | EtOHcl1 | EtOHcl2 | Galcl1 | YPDnc1 | YPDnc2 | YPDnc3 | YPDnc4 | EtOHnc1 | EtOHnc2 | Galnc1 | Galnc2 |
| 12 TIM18 | YOR297C   | YPDcl2 | YPDcl3 | -       | EtOHcl2 | Galcl1 | YPDnc1 | YPDnc2 | YPDnc3 | YPDnc4 | EtOHnc1 | EtOHnc2 | Galnc1 | Galnc2 |
| 12 ATP20 | YPR020W   | YPDcl2 | YPDcl3 | EtOHcl1 | -       | Galcl1 | YPDnc1 | YPDnc2 | YPDnc3 | YPDnc4 | EtOHnc1 | EtOHnc2 | Galnc1 | Galnc2 |
| 12 UBI4  | YLL039C   | YPDcl2 | YPDcl3 | EtOHcl1 | EtOHcl2 | Galcl1 | YPDnc1 | -      | YPDnc3 | YPDnc4 | EtOHnc1 | EtOHnc2 | Galnc1 | Galnc2 |
| 12 HSC82 | YMR186W   | YPDcl2 | YPDcl3 | EtOHcl1 | -       | Galcl1 | YPDnc1 | YPDnc2 | YPDnc3 | YPDnc4 | EtOHnc1 | EtOHnc2 | Galnc1 | Galnc2 |

|    |         |         |        |         |         |         |        |        |        |        |         |         |         |        |        |
|----|---------|---------|--------|---------|---------|---------|--------|--------|--------|--------|---------|---------|---------|--------|--------|
| 12 | YHL042W | YPDcl2  | YPDcl3 | EtOHcl1 | -       | Galcl1  | YPDnc1 | YPDnc2 | YPDnc3 | YPDnc4 | EtOHnc1 | EtOHnc2 | Galnc1  | Galnc2 |        |
| 12 | YOR011W | YPDcl2  | YPDcl3 | EtOHcl1 | EtOHcl2 | Galcl1  | YPDnc1 | YPDnc2 | YPDnc3 | YPDnc4 | -       | EtOHnc2 | Galnc1  | Galnc2 |        |
| 12 | TIF1    | YKR059W | YPDcl2 | YPDcl3  | EtOHcl1 | EtOHcl2 | Galcl1 | -      | YPDnc2 | YPDnc3 | YPDnc4  | EtOHnc1 | EtOHnc2 | Galnc1 | Galnc2 |
| 12 | BAP3    | YDR046C | YPDcl2 | -       | EtOHcl1 | EtOHcl2 | Galcl1 | YPDnc1 | YPDnc2 | YPDnc3 | YPDnc4  | EtOHnc1 | EtOHnc2 | Galnc1 | Galnc2 |
| 12 | YML018C | YPDcl2  | YPDcl3 | -       | EtOHcl2 | Galcl1  | YPDnc1 | YPDnc2 | YPDnc3 | YPDnc4 | EtOHnc1 | EtOHnc2 | Galnc1  | Galnc2 |        |
| 12 | RPS4A   | YJR145C | -      | YPDcl3  | EtOHcl1 | EtOHcl2 | Galcl1 | YPDnc1 | YPDnc2 | YPDnc3 | YPDnc4  | EtOHnc1 | EtOHnc2 | Galnc1 | Galnc2 |
| 12 | NHA1    | YLR138W | -      | YPDcl3  | EtOHcl1 | EtOHcl2 | Galcl1 | YPDnc1 | YPDnc2 | YPDnc3 | YPDnc4  | EtOHnc1 | EtOHnc2 | Galnc1 | Galnc2 |
| 12 | RPL14A  | YKL006W | YPDcl2 | -       | EtOHcl1 | EtOHcl2 | Galcl1 | YPDnc1 | YPDnc2 | YPDnc3 | YPDnc4  | EtOHnc1 | EtOHnc2 | Galnc1 | Galnc2 |
| 12 | ADA2    | YDR448W | YPDcl2 | YPDcl3  | EtOHcl1 | EtOHcl2 | Galcl1 | YPDnc1 | YPDnc2 | YPDnc3 | YPDnc4  | EtOHnc1 | -       | Galnc1 | Galnc2 |
| 12 | MDM30   | YLR368W | YPDcl2 | YPDcl3  | EtOHcl1 | -       | Galcl1 | YPDnc1 | YPDnc2 | YPDnc3 | YPDnc4  | EtOHnc1 | EtOHnc2 | Galnc1 | Galnc2 |
| 12 | ERG25   | YGR060W | YPDcl2 | YPDcl3  | EtOHcl1 | EtOHcl2 | -      | YPDnc1 | YPDnc2 | YPDnc3 | YPDnc4  | EtOHnc1 | EtOHnc2 | Galnc1 | Galnc2 |
| 12 | YML079W | -       | YPDcl3 | EtOHcl1 | EtOHcl2 | Galcl1  | YPDnc1 | YPDnc2 | YPDnc3 | YPDnc4 | EtOHnc1 | EtOHnc2 | Galnc1  | Galnc2 |        |
| 12 | YPL152W | YPDcl2  | YPDcl3 | EtOHcl1 | EtOHcl2 | -       | YPDnc1 | YPDnc2 | YPDnc3 | YPDnc4 | EtOHnc1 | EtOHnc2 | Galnc1  | Galnc2 |        |
| 12 | RHB1    | YCR027C | YPDcl2 | YPDcl3  | EtOHcl1 | -       | Galcl1 | YPDnc1 | YPDnc2 | YPDnc3 | YPDnc4  | EtOHnc1 | EtOHnc2 | Galnc1 | Galnc2 |
| 12 | RSP5    | YER125W | YPDcl2 | YPDcl3  | EtOHcl1 | -       | Galcl1 | YPDnc1 | YPDnc2 | YPDnc3 | YPDnc4  | EtOHnc1 | EtOHnc2 | Galnc1 | Galnc2 |
| 12 | NUP42   | YDR192C | YPDcl2 | -       | EtOHcl1 | EtOHcl2 | Galcl1 | YPDnc1 | YPDnc2 | YPDnc3 | YPDnc4  | EtOHnc1 | EtOHnc2 | Galnc1 | Galnc2 |
| 12 | HOP2    | YGL033W | YPDcl2 | YPDcl3  | EtOHcl1 | EtOHcl2 | -      | YPDnc1 | YPDnc2 | YPDnc3 | YPDnc4  | EtOHnc1 | EtOHnc2 | Galnc1 | Galnc2 |
| 12 | DML1    | YMR211W | YPDcl2 | YPDcl3  | EtOHcl1 | -       | Galcl1 | YPDnc1 | YPDnc2 | YPDnc3 | YPDnc4  | EtOHnc1 | EtOHnc2 | Galnc1 | Galnc2 |
| 12 | VHT1    | YGR065C | YPDcl2 | -       | EtOHcl1 | EtOHcl2 | Galcl1 | YPDnc1 | YPDnc2 | YPDnc3 | YPDnc4  | EtOHnc1 | EtOHnc2 | Galnc1 | Galnc2 |
| 12 | GCD1    | YOR260W | YPDcl2 | YPDcl3  | EtOHcl1 | EtOHcl2 | Galcl1 | -      | YPDnc2 | YPDnc3 | YPDnc4  | EtOHnc1 | EtOHnc2 | Galnc1 | Galnc2 |
| 12 | SPO13   | YHR014W | YPDcl2 | YPDcl3  | EtOHcl1 | -       | Galcl1 | YPDnc1 | YPDnc2 | YPDnc3 | YPDnc4  | EtOHnc1 | EtOHnc2 | Galnc1 | Galnc2 |
| 12 | MEF2    | YJL102W | -      | YPDcl3  | EtOHcl1 | EtOHcl2 | Galcl1 | YPDnc1 | YPDnc2 | YPDnc3 | YPDnc4  | EtOHnc1 | EtOHnc2 | Galnc1 | Galnc2 |
| 12 | TSC13   | YDL015C | YPDcl2 | -       | EtOHcl1 | EtOHcl2 | Galcl1 | YPDnc1 | YPDnc2 | YPDnc3 | YPDnc4  | EtOHnc1 | EtOHnc2 | Galnc1 | Galnc2 |
| 12 | HSP31   | YDR533C | YPDcl2 | YPDcl3  | EtOHcl1 | EtOHcl2 | Galcl1 | YPDnc1 | YPDnc2 | YPDnc3 | YPDnc4  | EtOHnc1 | -       | Galnc1 | Galnc2 |
| 12 | SWC7    | YLR385C | YPDcl2 | YPDcl3  | EtOHcl1 | -       | Galcl1 | YPDnc1 | YPDnc2 | YPDnc3 | YPDnc4  | EtOHnc1 | EtOHnc2 | Galnc1 | Galnc2 |
| 12 | GTO1    | YGR154C | YPDcl2 | -       | EtOHcl1 | EtOHcl2 | Galcl1 | YPDnc1 | YPDnc2 | YPDnc3 | YPDnc4  | EtOHnc1 | EtOHnc2 | Galnc1 | Galnc2 |
| 12 | MET2    | YNL277W | YPDcl2 | -       | EtOHcl1 | EtOHcl2 | Galcl1 | YPDnc1 | YPDnc2 | YPDnc3 | YPDnc4  | EtOHnc1 | EtOHnc2 | Galnc1 | Galnc2 |
| 12 | PRS5    | YOL061W | YPDcl2 | YPDcl3  | -       | EtOHcl2 | Galcl1 | YPDnc1 | YPDnc2 | YPDnc3 | YPDnc4  | EtOHnc1 | EtOHnc2 | Galnc1 | Galnc2 |
| 12 | HCR1    | YLR192C | YPDcl2 | YPDcl3  | EtOHcl1 | EtOHcl2 | Galcl1 | YPDnc1 | YPDnc2 | YPDnc3 | YPDnc4  | -       | EtOHnc2 | Galnc1 | Galnc2 |
| 12 | RBL2    | YOR265W | YPDcl2 | YPDcl3  | EtOHcl1 | -       | Galcl1 | YPDnc1 | YPDnc2 | YPDnc3 | YPDnc4  | EtOHnc1 | EtOHnc2 | Galnc1 | Galnc2 |
| 12 | YOR333C | YPDcl2  | YPDcl3 | EtOHcl1 | -       | Galcl1  | YPDnc1 | YPDnc2 | YPDnc3 | YPDnc4 | EtOHnc1 | EtOHnc2 | Galnc1  | Galnc2 |        |
| 12 | PKH1    | YDR490C | YPDcl2 | YPDcl3  | EtOHcl1 | EtOHcl2 | Galcl1 | YPDnc1 | YPDnc2 | YPDnc3 | YPDnc4  | EtOHnc1 | EtOHnc2 | Galnc1 | -      |
| 12 | VPS38   | YLR360W | YPDcl2 | YPDcl3  | EtOHcl1 | EtOHcl2 | Galcl1 | YPDnc1 | YPDnc2 | -      | YPDnc4  | EtOHnc1 | EtOHnc2 | Galnc1 | Galnc2 |
| 12 | LSC1    | YOR142W | YPDcl2 | YPDcl3  | EtOHcl1 | -       | Galcl1 | YPDnc1 | YPDnc2 | YPDnc3 | YPDnc4  | EtOHnc1 | EtOHnc2 | Galnc1 | Galnc2 |

|          |           |        |        |         |         |        |        |        |        |        |         |         |        |        |
|----------|-----------|--------|--------|---------|---------|--------|--------|--------|--------|--------|---------|---------|--------|--------|
| 12 CPR5  | YDR304C   | YPDcl2 | YPDcl3 | EtOHcl1 | EtOHcl2 | Galcl1 | YPDnc1 | YPDnc2 | -      | YPDnc4 | EtOHnc1 | EtOHnc2 | Galnc1 | Galnc2 |
| 12 PUS5  | YLR165C   | YPDcl2 | YPDcl3 | EtOHcl1 | -       | Galcl1 | YPDnc1 | YPDnc2 | YPDnc3 | YPDnc4 | EtOHnc1 | EtOHnc2 | Galnc1 | Galnc2 |
| 12 ERM6  | YJR054W   | YPDcl2 | YPDcl3 | EtOHcl1 | EtOHcl2 | Galcl1 | YPDnc1 | YPDnc2 | YPDnc3 | YPDnc4 | -       | EtOHnc2 | Galnc1 | Galnc2 |
| 12 PEP4  | YPL154C   | -      | YPDcl3 | EtOHcl1 | EtOHcl2 | Galcl1 | YPDnc1 | YPDnc2 | YPDnc3 | YPDnc4 | EtOHnc1 | EtOHnc2 | Galnc1 | Galnc2 |
| 12 SIC1  | YLR079W   | YPDcl2 | YPDcl3 | EtOHcl1 | EtOHcl2 | Galcl1 | YPDnc1 | YPDnc2 | YPDnc3 | -      | EtOHnc1 | EtOHnc2 | Galnc1 | Galnc2 |
| 12 RPO21 | YDL140C   | -      | YPDcl3 | EtOHcl1 | EtOHcl2 | Galcl1 | YPDnc1 | YPDnc2 | YPDnc3 | YPDnc4 | EtOHnc1 | EtOHnc2 | Galnc1 | Galnc2 |
| 12 PPA1  | YHR026W   | YPDcl2 | YPDcl3 | EtOHcl1 | EtOHcl2 | Galcl1 | YPDnc1 | -      | YPDnc3 | YPDnc4 | EtOHnc1 | EtOHnc2 | Galnc1 | Galnc2 |
| 12 PRR1  | YKL116C   | YPDcl2 | -      | EtOHcl1 | EtOHcl2 | Galcl1 | YPDnc1 | YPDnc2 | YPDnc3 | YPDnc4 | EtOHnc1 | EtOHnc2 | Galnc1 | Galnc2 |
| 12 ECM30 | YLR436C   | YPDcl2 | YPDcl3 | EtOHcl1 | EtOHcl2 | Galcl1 | YPDnc1 | YPDnc2 | YPDnc3 | YPDnc4 | EtOHnc1 | EtOHnc2 | -      | Galnc2 |
| 12       | YPR160C-A | YPDcl2 | YPDcl3 | EtOHcl1 | -       | Galcl1 | YPDnc1 | YPDnc2 | YPDnc3 | YPDnc4 | EtOHnc1 | EtOHnc2 | Galnc1 | Galnc2 |
| 12 UBC8  | YEL012W   | YPDcl2 | YPDcl3 | EtOHcl1 | EtOHcl2 | Galcl1 | YPDnc1 | YPDnc2 | YPDnc3 | YPDnc4 | EtOHnc1 | -       | Galnc1 | Galnc2 |
| 12 THI72 | YOR192C   | -      | YPDcl3 | EtOHcl1 | EtOHcl2 | Galcl1 | YPDnc1 | YPDnc2 | YPDnc3 | YPDnc4 | EtOHnc1 | EtOHnc2 | Galnc1 | Galnc2 |
| 12 OPT2  | YPR194C   | YPDcl2 | YPDcl3 | EtOHcl1 | -       | Galcl1 | YPDnc1 | YPDnc2 | YPDnc3 | YPDnc4 | EtOHnc1 | EtOHnc2 | Galnc1 | Galnc2 |
| 12 PAU13 | YHL046C   | YPDcl2 | YPDcl3 | EtOHcl1 | -       | Galcl1 | YPDnc1 | YPDnc2 | YPDnc3 | YPDnc4 | EtOHnc1 | EtOHnc2 | Galnc1 | Galnc2 |
| 12 LAS21 | YJL062W   | YPDcl2 | YPDcl3 | EtOHcl1 | EtOHcl2 | Galcl1 | -      | YPDnc2 | YPDnc3 | YPDnc4 | EtOHnc1 | EtOHnc2 | Galnc1 | Galnc2 |
| 12 RPS0B | YLR048W   | -      | YPDcl3 | EtOHcl1 | EtOHcl2 | Galcl1 | YPDnc1 | YPDnc2 | YPDnc3 | YPDnc4 | EtOHnc1 | EtOHnc2 | Galnc1 | Galnc2 |
| 12 NTC20 | YBR188C   | YPDcl2 | YPDcl3 | EtOHcl1 | EtOHcl2 | Galcl1 | -      | YPDnc2 | YPDnc3 | YPDnc4 | EtOHnc1 | EtOHnc2 | Galnc1 | Galnc2 |
| 12 EUG1  | YDR518W   | YPDcl2 | YPDcl3 | EtOHcl1 | EtOHcl2 | Galcl1 | YPDnc1 | YPDnc2 | YPDnc3 | YPDnc4 | -       | EtOHnc2 | Galnc1 | Galnc2 |
| 12       | YJL120W   | YPDcl2 | YPDcl3 | EtOHcl1 | -       | Galcl1 | YPDnc1 | YPDnc2 | YPDnc3 | YPDnc4 | EtOHnc1 | EtOHnc2 | Galnc1 | Galnc2 |
| 12 RAD6  | YGL058W   | YPDcl2 | YPDcl3 | EtOHcl1 | EtOHcl2 | -      | YPDnc1 | YPDnc2 | YPDnc3 | YPDnc4 | EtOHnc1 | EtOHnc2 | Galnc1 | Galnc2 |
| 12 SEC4  | YFL005W   | YPDcl2 | -      | EtOHcl1 | EtOHcl2 | Galcl1 | YPDnc1 | YPDnc2 | YPDnc3 | YPDnc4 | EtOHnc1 | EtOHnc2 | Galnc1 | Galnc2 |
| 12 YUR1  | YJL139C   | YPDcl2 | -      | EtOHcl1 | EtOHcl2 | Galcl1 | YPDnc1 | YPDnc2 | YPDnc3 | YPDnc4 | EtOHnc1 | EtOHnc2 | Galnc1 | Galnc2 |
| 12       | YDL129W   | -      | YPDcl3 | EtOHcl1 | EtOHcl2 | Galcl1 | YPDnc1 | YPDnc2 | YPDnc3 | YPDnc4 | EtOHnc1 | EtOHnc2 | Galnc1 | Galnc2 |
| 12 POG1  | YIL122W   | YPDcl2 | YPDcl3 | EtOHcl1 | -       | Galcl1 | YPDnc1 | YPDnc2 | YPDnc3 | YPDnc4 | EtOHnc1 | EtOHnc2 | Galnc1 | Galnc2 |
| 12 ERV2  | YPR037C   | YPDcl2 | -      | EtOHcl1 | EtOHcl2 | Galcl1 | YPDnc1 | YPDnc2 | YPDnc3 | YPDnc4 | EtOHnc1 | EtOHnc2 | Galnc1 | Galnc2 |
| 12 EMP46 | YLR080W   | YPDcl2 | YPDcl3 | EtOHcl1 | EtOHcl2 | -      | YPDnc1 | YPDnc2 | YPDnc3 | YPDnc4 | EtOHnc1 | EtOHnc2 | Galnc1 | Galnc2 |
| 12 SGE1  | YPR198W   | YPDcl2 | YPDcl3 | EtOHcl1 | EtOHcl2 | Galcl1 | YPDnc1 | -      | YPDnc3 | YPDnc4 | EtOHnc1 | EtOHnc2 | Galnc1 | Galnc2 |
| 12 PRE5  | YMR314W   | YPDcl2 | YPDcl3 | EtOHcl1 | EtOHcl2 | Galcl1 | YPDnc1 | -      | YPDnc3 | YPDnc4 | EtOHnc1 | EtOHnc2 | Galnc1 | Galnc2 |
| 12       | YNL247W   | YPDcl2 | YPDcl3 | EtOHcl1 | -       | Galcl1 | YPDnc1 | YPDnc2 | YPDnc3 | YPDnc4 | EtOHnc1 | EtOHnc2 | Galnc1 | Galnc2 |
| 12 PRP40 | YKL012W   | YPDcl2 | YPDcl3 | EtOHcl1 | EtOHcl2 | Galcl1 | YPDnc1 | YPDnc2 | YPDnc3 | YPDnc4 | EtOHnc1 | EtOHnc2 | Galnc1 | -      |
| 12       | YOR020W   | YPDcl2 | -      | EtOHcl1 | EtOHcl2 | Galcl1 | YPDnc1 | YPDnc2 | YPDnc3 | YPDnc4 | EtOHnc1 | EtOHnc2 | Galnc1 | Galnc2 |
| 12 SWA2  | YDR320C   | YPDcl2 | YPDcl3 | -       | EtOHcl2 | Galcl1 | YPDnc1 | YPDnc2 | YPDnc3 | YPDnc4 | EtOHnc1 | EtOHnc2 | Galnc1 | Galnc2 |
| 12 TPD3  | YAL016W   | -      | YPDcl3 | EtOHcl1 | EtOHcl2 | Galcl1 | YPDnc1 | YPDnc2 | YPDnc3 | YPDnc4 | EtOHnc1 | EtOHnc2 | Galnc1 | Galnc2 |
| 12 ICT1  | YLR099C   | YPDcl2 | YPDcl3 | EtOHcl1 | EtOHcl2 | -      | YPDnc1 | YPDnc2 | YPDnc3 | YPDnc4 | EtOHnc1 | EtOHnc2 | Galnc1 | Galnc2 |

|    |           |         |        |         |         |         |        |        |        |        |         |         |         |        |        |
|----|-----------|---------|--------|---------|---------|---------|--------|--------|--------|--------|---------|---------|---------|--------|--------|
| 12 | YNL277W-  | YPDcl2  | YPDcl3 | EtOHcl1 | EtOHcl2 | Galcl1  | YPDnc1 | YPDnc2 | -      | YPDnc4 | EtOHnc1 | EtOHnc2 | Galnc1  | Galnc2 |        |
| 12 | SPC2      | YML055W | YPDcl2 | YPDcl3  | EtOHcl1 | -       | Galcl1 | YPDnc1 | YPDnc2 | YPDnc3 | YPDnc4  | EtOHnc1 | EtOHnc2 | Galnc1 | Galnc2 |
| 12 | YFL052W   | YPDcl2  | YPDcl3 | EtOHcl1 | -       | Galcl1  | YPDnc1 | YPDnc2 | YPDnc3 | YPDnc4 | EtOHnc1 | EtOHnc2 | Galnc1  | Galnc2 |        |
| 12 | THI21     | YPL258C | YPDcl2 | YPDcl3  | EtOHcl1 | -       | Galcl1 | YPDnc1 | YPDnc2 | YPDnc3 | YPDnc4  | EtOHnc1 | EtOHnc2 | Galnc1 | Galnc2 |
| 12 | CDA1      | YLR307W | YPDcl2 | YPDcl3  | EtOHcl1 | -       | Galcl1 | YPDnc1 | YPDnc2 | YPDnc3 | YPDnc4  | EtOHnc1 | EtOHnc2 | Galnc1 | Galnc2 |
| 12 | YHR003C   | YPDcl2  | YPDcl3 | EtOHcl1 | EtOHcl2 | Galcl1  | YPDnc1 | YPDnc2 | YPDnc3 | YPDnc4 | EtOHnc1 | EtOHnc2 | Galnc1  | -      |        |
| 12 | YPL025C   | YPDcl2  | YPDcl3 | EtOHcl1 | -       | Galcl1  | YPDnc1 | YPDnc2 | YPDnc3 | YPDnc4 | EtOHnc1 | EtOHnc2 | Galnc1  | Galnc2 |        |
| 12 | SLX8      | YER116C | YPDcl2 | YPDcl3  | EtOHcl1 | EtOHcl2 | Galcl1 | YPDnc1 | YPDnc2 | YPDnc3 | YPDnc4  | -       | EtOHnc2 | Galnc1 | Galnc2 |
| 12 | HIS3      | YOR202W | YPDcl2 | YPDcl3  | EtOHcl1 | EtOHcl2 | Galcl1 | YPDnc1 | YPDnc2 | YPDnc3 | YPDnc4  | EtOHnc1 | -       | Galnc1 | Galnc2 |
| 12 | YGR137W   | -       | YPDcl3 | EtOHcl1 | EtOHcl2 | Galcl1  | YPDnc1 | YPDnc2 | YPDnc3 | YPDnc4 | EtOHnc1 | EtOHnc2 | Galnc1  | Galnc2 |        |
| 12 | PUF2      | YPR042C | YPDcl2 | YPDcl3  | EtOHcl1 | EtOHcl2 | Galcl1 | YPDnc1 | YPDnc2 | YPDnc3 | YPDnc4  | EtOHnc1 | EtOHnc2 | Galnc1 | -      |
| 12 | AAC3      | YBR085W | YPDcl2 | YPDcl3  | EtOHcl1 | -       | Galcl1 | YPDnc1 | YPDnc2 | YPDnc3 | YPDnc4  | EtOHnc1 | EtOHnc2 | Galnc1 | Galnc2 |
| 12 | YDR053W   | YPDcl2  | YPDcl3 | -       | EtOHcl2 | Galcl1  | YPDnc1 | YPDnc2 | YPDnc3 | YPDnc4 | EtOHnc1 | EtOHnc2 | Galnc1  | Galnc2 |        |
| 12 | YPL264C   | -       | YPDcl3 | EtOHcl1 | EtOHcl2 | Galcl1  | YPDnc1 | YPDnc2 | YPDnc3 | YPDnc4 | EtOHnc1 | EtOHnc2 | Galnc1  | Galnc2 |        |
| 12 | FIT2      | YOR382W | YPDcl2 | YPDcl3  | EtOHcl1 | -       | Galcl1 | YPDnc1 | YPDnc2 | YPDnc3 | YPDnc4  | EtOHnc1 | EtOHnc2 | Galnc1 | Galnc2 |
| 12 | PKP2      | YGL059W | YPDcl2 | YPDcl3  | EtOHcl1 | EtOHcl2 | Galcl1 | YPDnc1 | YPDnc2 | YPDnc3 | YPDnc4  | EtOHnc1 | EtOHnc2 | -      | Galnc2 |
| 12 | PRI2      | YKL045W | YPDcl2 | YPDcl3  | EtOHcl1 | EtOHcl2 | Galcl1 | YPDnc1 | YPDnc2 | YPDnc3 | YPDnc4  | EtOHnc1 | -       | Galnc1 | Galnc2 |
| 12 | MEU1      | YLR017W | YPDcl2 | YPDcl3  | EtOHcl1 | -       | Galcl1 | YPDnc1 | YPDnc2 | YPDnc3 | YPDnc4  | EtOHnc1 | EtOHnc2 | Galnc1 | Galnc2 |
| 12 | YNL165W   | YPDcl2  | -      | EtOHcl1 | EtOHcl2 | Galcl1  | YPDnc1 | YPDnc2 | YPDnc3 | YPDnc4 | EtOHnc1 | EtOHnc2 | Galnc1  | Galnc2 |        |
| 12 | FET4      | YMR319C | YPDcl2 | YPDcl3  | EtOHcl1 | -       | Galcl1 | YPDnc1 | YPDnc2 | YPDnc3 | YPDnc4  | EtOHnc1 | EtOHnc2 | Galnc1 | Galnc2 |
| 12 | YOR152C   | YPDcl2  | YPDcl3 | EtOHcl1 | EtOHcl2 | Galcl1  | YPDnc1 | YPDnc2 | YPDnc3 | YPDnc4 | EtOHnc1 | -       | Galnc1  | Galnc2 |        |
| 12 | BAP2      | YBR068C | -      | YPDcl3  | EtOHcl1 | EtOHcl2 | Galcl1 | YPDnc1 | YPDnc2 | YPDnc3 | YPDnc4  | EtOHnc1 | EtOHnc2 | Galnc1 | Galnc2 |
| 12 | YER138W-  | YPDcl2  | YPDcl3 | EtOHcl1 | -       | Galcl1  | YPDnc1 | YPDnc2 | YPDnc3 | YPDnc4 | EtOHnc1 | EtOHnc2 | Galnc1  | Galnc2 |        |
| 12 | FRE3      | YOR381W | YPDcl2 | YPDcl3  | EtOHcl1 | -       | Galcl1 | YPDnc1 | YPDnc2 | YPDnc3 | YPDnc4  | EtOHnc1 | EtOHnc2 | Galnc1 | Galnc2 |
| 12 | MNE1      | YOR350C | YPDcl2 | -       | EtOHcl1 | EtOHcl2 | Galcl1 | YPDnc1 | YPDnc2 | YPDnc3 | YPDnc4  | EtOHnc1 | EtOHnc2 | Galnc1 | Galnc2 |
| 12 | SFP1      | YLR403W | YPDcl2 | YPDcl3  | EtOHcl1 | -       | Galcl1 | YPDnc1 | YPDnc2 | YPDnc3 | YPDnc4  | EtOHnc1 | EtOHnc2 | Galnc1 | Galnc2 |
| 12 | KGD2      | YDR148C | YPDcl2 | YPDcl3  | EtOHcl1 | -       | Galcl1 | YPDnc1 | YPDnc2 | YPDnc3 | YPDnc4  | EtOHnc1 | EtOHnc2 | Galnc1 | Galnc2 |
| 12 | YER067C-A | YPDcl2  | -      | EtOHcl1 | EtOHcl2 | Galcl1  | YPDnc1 | YPDnc2 | YPDnc3 | YPDnc4 | EtOHnc1 | EtOHnc2 | Galnc1  | Galnc2 |        |
| 12 | ERG2      | YMR202W | -      | YPDcl3  | EtOHcl1 | EtOHcl2 | Galcl1 | YPDnc1 | YPDnc2 | YPDnc3 | YPDnc4  | EtOHnc1 | EtOHnc2 | Galnc1 | Galnc2 |
| 12 | SFL1      | YOR140W | YPDcl2 | YPDcl3  | -       | EtOHcl2 | Galcl1 | YPDnc1 | YPDnc2 | YPDnc3 | YPDnc4  | EtOHnc1 | EtOHnc2 | Galnc1 | Galnc2 |
| 12 | SSP120    | YLR250W | YPDcl2 | YPDcl3  | EtOHcl1 | EtOHcl2 | Galcl1 | YPDnc1 | YPDnc2 | -      | YPDnc4  | EtOHnc1 | EtOHnc2 | Galnc1 | Galnc2 |
| 12 | SUV3      | YPL029W | -      | YPDcl3  | EtOHcl1 | EtOHcl2 | Galcl1 | YPDnc1 | YPDnc2 | YPDnc3 | YPDnc4  | EtOHnc1 | EtOHnc2 | Galnc1 | Galnc2 |
| 12 | YOL013W-  | YPDcl2  | YPDcl3 | EtOHcl1 | -       | Galcl1  | YPDnc1 | YPDnc2 | YPDnc3 | YPDnc4 | EtOHnc1 | EtOHnc2 | Galnc1  | Galnc2 |        |
| 12 | RSM24     | YDR175C | YPDcl2 | YPDcl3  | EtOHcl1 | -       | Galcl1 | YPDnc1 | YPDnc2 | YPDnc3 | YPDnc4  | EtOHnc1 | EtOHnc2 | Galnc1 | Galnc2 |

|    |       |           |        |        |         |         |        |        |        |        |        |         |         |        |        |
|----|-------|-----------|--------|--------|---------|---------|--------|--------|--------|--------|--------|---------|---------|--------|--------|
| 12 | GPI11 | YDR302W   | YPDcl2 | YPDcl3 | EtOHcl1 | -       | Galcl1 | YPDnc1 | YPDnc2 | YPDnc3 | YPDnc4 | EtOHnc1 | EtOHnc2 | Galnc1 | Galnc2 |
| 12 | VPS75 | YNL246W   | -      | YPDcl3 | EtOHcl1 | EtOHcl2 | Galcl1 | YPDnc1 | YPDnc2 | YPDnc3 | YPDnc4 | EtOHnc1 | EtOHnc2 | Galnc1 | Galnc2 |
| 12 |       | YOR231C-A | YPDcl2 | YPDcl3 | -       | EtOHcl2 | Galcl1 | YPDnc1 | YPDnc2 | YPDnc3 | YPDnc4 | EtOHnc1 | EtOHnc2 | Galnc1 | Galnc2 |
| 12 | AFT2  | YPL202C   | -      | YPDcl3 | EtOHcl1 | EtOHcl2 | Galcl1 | YPDnc1 | YPDnc2 | YPDnc3 | YPDnc4 | EtOHnc1 | EtOHnc2 | Galnc1 | Galnc2 |
| 12 | GWT1  | YJL091C   | YPDcl2 | YPDcl3 | EtOHcl1 | -       | Galcl1 | YPDnc1 | YPDnc2 | YPDnc3 | YPDnc4 | EtOHnc1 | EtOHnc2 | Galnc1 | Galnc2 |
| 12 |       | YLR283W   | YPDcl2 | YPDcl3 | EtOHcl1 | -       | Galcl1 | YPDnc1 | YPDnc2 | YPDnc3 | YPDnc4 | EtOHnc1 | EtOHnc2 | Galnc1 | Galnc2 |
| 12 | PMT6  | YGR199W   | YPDcl2 | -      | EtOHcl1 | EtOHcl2 | Galcl1 | YPDnc1 | YPDnc2 | YPDnc3 | YPDnc4 | EtOHnc1 | EtOHnc2 | Galnc1 | Galnc2 |
| 12 |       | YML122C   | YPDcl2 | -      | EtOHcl1 | EtOHcl2 | Galcl1 | YPDnc1 | YPDnc2 | YPDnc3 | YPDnc4 | EtOHnc1 | EtOHnc2 | Galnc1 | Galnc2 |
| 12 | PCL7  | YIL050W   | YPDcl2 | YPDcl3 | EtOHcl1 | -       | Galcl1 | YPDnc1 | YPDnc2 | YPDnc3 | YPDnc4 | EtOHnc1 | EtOHnc2 | Galnc1 | Galnc2 |
| 12 | NRM1  | YNR009W   | YPDcl2 | YPDcl3 | EtOHcl1 | -       | Galcl1 | YPDnc1 | YPDnc2 | YPDnc3 | YPDnc4 | EtOHnc1 | EtOHnc2 | Galnc1 | Galnc2 |
| 12 | HOS2  | YGL194C   | YPDcl2 | YPDcl3 | EtOHcl1 | EtOHcl2 | Galcl1 | YPDnc1 | YPDnc2 | YPDnc3 | YPDnc4 | EtOHnc1 | EtOHnc2 | Galnc1 | -      |
| 12 | VAM3  | YOR106W   | YPDcl2 | YPDcl3 | EtOHcl1 | -       | Galcl1 | YPDnc1 | YPDnc2 | YPDnc3 | YPDnc4 | EtOHnc1 | EtOHnc2 | Galnc1 | Galnc2 |
| 12 | HEM13 | YDR044W   | YPDcl2 | -      | EtOHcl1 | EtOHcl2 | Galcl1 | YPDnc1 | YPDnc2 | YPDnc3 | YPDnc4 | EtOHnc1 | EtOHnc2 | Galnc1 | Galnc2 |
| 12 |       | YDR514C   | YPDcl2 | YPDcl3 | EtOHcl1 | EtOHcl2 | Galcl1 | -      | YPDnc2 | YPDnc3 | YPDnc4 | EtOHnc1 | EtOHnc2 | Galnc1 | Galnc2 |
| 12 |       | YEL045C   | YPDcl2 | YPDcl3 | EtOHcl1 | -       | Galcl1 | YPDnc1 | YPDnc2 | YPDnc3 | YPDnc4 | EtOHnc1 | EtOHnc2 | Galnc1 | Galnc2 |
| 12 |       | YML116W-  | YPDcl2 | YPDcl3 | EtOHcl1 | EtOHcl2 | Galcl1 | YPDnc1 | YPDnc2 | -      | YPDnc4 | EtOHnc1 | EtOHnc2 | Galnc1 | Galnc2 |
| 12 |       | YFL031C-A | YPDcl2 | YPDcl3 | EtOHcl1 | EtOHcl2 | Galcl1 | YPDnc1 | YPDnc2 | YPDnc3 | YPDnc4 | EtOHnc1 | -       | Galnc1 | Galnc2 |
| 12 | SOP4  | YJL192C   | YPDcl2 | YPDcl3 | EtOHcl1 | -       | Galcl1 | YPDnc1 | YPDnc2 | YPDnc3 | YPDnc4 | EtOHnc1 | EtOHnc2 | Galnc1 | Galnc2 |
| 12 |       | YAL067W-  | YPDcl2 | YPDcl3 | EtOHcl1 | -       | Galcl1 | YPDnc1 | YPDnc2 | YPDnc3 | YPDnc4 | EtOHnc1 | EtOHnc2 | Galnc1 | Galnc2 |
| 12 |       | YHR180W   | YPDcl2 | YPDcl3 | EtOHcl1 | EtOHcl2 | Galcl1 | YPDnc1 | YPDnc2 | YPDnc3 | YPDnc4 | EtOHnc1 | EtOHnc2 | Galnc1 | -      |
| 12 | SEC27 | YGL137W   | YPDcl2 | -      | EtOHcl1 | EtOHcl2 | Galcl1 | YPDnc1 | YPDnc2 | YPDnc3 | YPDnc4 | EtOHnc1 | EtOHnc2 | Galnc1 | Galnc2 |
| 12 | TIM10 | YHR005C-A | YPDcl2 | YPDcl3 | EtOHcl1 | EtOHcl2 | Galcl1 | YPDnc1 | -      | YPDnc3 | YPDnc4 | EtOHnc1 | EtOHnc2 | Galnc1 | Galnc2 |
| 12 | VAM7  | YGL212W   | -      | YPDcl3 | EtOHcl1 | EtOHcl2 | Galcl1 | YPDnc1 | YPDnc2 | YPDnc3 | YPDnc4 | EtOHnc1 | EtOHnc2 | Galnc1 | Galnc2 |
| 12 |       | YJL156W-A | -      | YPDcl3 | EtOHcl1 | EtOHcl2 | Galcl1 | YPDnc1 | YPDnc2 | YPDnc3 | YPDnc4 | EtOHnc1 | EtOHnc2 | Galnc1 | Galnc2 |
| 12 | MNR2  | YKL064W   | YPDcl2 | YPDcl3 | EtOHcl1 | EtOHcl2 | Galcl1 | YPDnc1 | YPDnc2 | YPDnc3 | -      | EtOHnc1 | EtOHnc2 | Galnc1 | Galnc2 |
| 12 | VIK1  | YPL253C   | YPDcl2 | YPDcl3 | EtOHcl1 | EtOHcl2 | -      | YPDnc1 | YPDnc2 | YPDnc3 | YPDnc4 | EtOHnc1 | EtOHnc2 | Galnc1 | Galnc2 |
| 12 | CCW14 | YLR390W-  | YPDcl2 | YPDcl3 | EtOHcl1 | -       | Galcl1 | YPDnc1 | YPDnc2 | YPDnc3 | YPDnc4 | EtOHnc1 | EtOHnc2 | Galnc1 | Galnc2 |
| 12 |       | YPR146C   | -      | YPDcl3 | EtOHcl1 | EtOHcl2 | Galcl1 | YPDnc1 | YPDnc2 | YPDnc3 | YPDnc4 | EtOHnc1 | EtOHnc2 | Galnc1 | Galnc2 |
| 12 | NOP4  | YPL043W   | YPDcl2 | YPDcl3 | EtOHcl1 | -       | Galcl1 | YPDnc1 | YPDnc2 | YPDnc3 | YPDnc4 | EtOHnc1 | EtOHnc2 | Galnc1 | Galnc2 |
| 12 | TFG1  | YGR186W   | YPDcl2 | YPDcl3 | EtOHcl1 | EtOHcl2 | Galcl1 | -      | YPDnc2 | YPDnc3 | YPDnc4 | EtOHnc1 | EtOHnc2 | Galnc1 | Galnc2 |
| 12 | MRP4  | YHL004W   | YPDcl2 | YPDcl3 | EtOHcl1 | EtOHcl2 | Galcl1 | YPDnc1 | -      | YPDnc3 | YPDnc4 | EtOHnc1 | EtOHnc2 | Galnc1 | Galnc2 |
| 12 | HPC2  | YBR215W   | YPDcl2 | YPDcl3 | EtOHcl1 | EtOHcl2 | Galcl1 | YPDnc1 | YPDnc2 | YPDnc3 | YPDnc4 | EtOHnc1 | EtOHnc2 | Galnc1 | -      |
| 12 | SLC1  | YDL052C   | -      | YPDcl3 | EtOHcl1 | EtOHcl2 | Galcl1 | YPDnc1 | YPDnc2 | YPDnc3 | YPDnc4 | EtOHnc1 | EtOHnc2 | Galnc1 | Galnc2 |
| 12 | HOR2  | YER062C   | YPDcl2 | -      | EtOHcl1 | EtOHcl2 | Galcl1 | YPDnc1 | YPDnc2 | YPDnc3 | YPDnc4 | EtOHnc1 | EtOHnc2 | Galnc1 | Galnc2 |

|          |         |        |        |         |         |        |        |        |        |        |         |         |        |        |
|----------|---------|--------|--------|---------|---------|--------|--------|--------|--------|--------|---------|---------|--------|--------|
| 12 CDC50 | YCR094W | YPDcl2 | YPDcl3 | EtOHcl1 | EtOHcl2 | Galcl1 | -      | YPDnc2 | YPDnc3 | YPDnc4 | EtOHnc1 | EtOHnc2 | Galnc1 | Galnc2 |
| 12 VTC4  | YJL012C | YPDcl2 | YPDcl3 | EtOHcl1 | EtOHcl2 | Galcl1 | YPDnc1 | YPDnc2 | YPDnc3 | YPDnc4 | EtOHnc1 | -       | Galnc1 | Galnc2 |
| 12 FAA4  | YMR246W | YPDcl2 | YPDcl3 | EtOHcl1 | EtOHcl2 | Galcl1 | YPDnc1 | YPDnc2 | YPDnc3 | YPDnc4 | EtOHnc1 | -       | Galnc1 | Galnc2 |
| 12       | YAR047C | YPDcl2 | YPDcl3 | EtOHcl1 | -       | Galcl1 | YPDnc1 | YPDnc2 | YPDnc3 | YPDnc4 | EtOHnc1 | EtOHnc2 | Galnc1 | Galnc2 |
| 12 SWC5  | YBR231C | YPDcl2 | -      | EtOHcl1 | EtOHcl2 | Galcl1 | YPDnc1 | YPDnc2 | YPDnc3 | YPDnc4 | EtOHnc1 | EtOHnc2 | Galnc1 | Galnc2 |
| 12 PCD1  | YLR151C | YPDcl2 | YPDcl3 | EtOHcl1 | -       | Galcl1 | YPDnc1 | YPDnc2 | YPDnc3 | YPDnc4 | EtOHnc1 | EtOHnc2 | Galnc1 | Galnc2 |
| 12 PDC6  | YGR087C | YPDcl2 | YPDcl3 | EtOHcl1 | EtOHcl2 | Galcl1 | YPDnc1 | YPDnc2 | YPDnc3 | YPDnc4 | EtOHnc1 | -       | Galnc1 | Galnc2 |
| 12       | YMR262W | YPDcl2 | -      | EtOHcl1 | EtOHcl2 | Galcl1 | YPDnc1 | YPDnc2 | YPDnc3 | YPDnc4 | EtOHnc1 | EtOHnc2 | Galnc1 | Galnc2 |
| 12 REC8  | YPR007C | YPDcl2 | YPDcl3 | EtOHcl1 | -       | Galcl1 | YPDnc1 | YPDnc2 | YPDnc3 | YPDnc4 | EtOHnc1 | EtOHnc2 | Galnc1 | Galnc2 |
| 12 SIP2  | YGL208W | YPDcl2 | YPDcl3 | EtOHcl1 | EtOHcl2 | Galcl1 | YPDnc1 | YPDnc2 | YPDnc3 | YPDnc4 | EtOHnc1 | -       | Galnc1 | Galnc2 |
| 12       | YGR226C | -      | YPDcl3 | EtOHcl1 | EtOHcl2 | Galcl1 | YPDnc1 | YPDnc2 | YPDnc3 | YPDnc4 | EtOHnc1 | EtOHnc2 | Galnc1 | Galnc2 |
| 12 UFD1  | YGR048W | YPDcl2 | YPDcl3 | EtOHcl1 | -       | Galcl1 | YPDnc1 | YPDnc2 | YPDnc3 | YPDnc4 | EtOHnc1 | EtOHnc2 | Galnc1 | Galnc2 |
| 12 MCX1  | YBR227C | YPDcl2 | YPDcl3 | EtOHcl1 | EtOHcl2 | Galcl1 | -      | YPDnc2 | YPDnc3 | YPDnc4 | EtOHnc1 | EtOHnc2 | Galnc1 | Galnc2 |
| 12 BIM1  | YER016W | YPDcl2 | YPDcl3 | EtOHcl1 | EtOHcl2 | Galcl1 | YPDnc1 | YPDnc2 | YPDnc3 | -      | EtOHnc1 | EtOHnc2 | Galnc1 | Galnc2 |
| 12       | YLR099W | YPDcl2 | YPDcl3 | EtOHcl1 | EtOHcl2 | -      | YPDnc1 | YPDnc2 | YPDnc3 | YPDnc4 | EtOHnc1 | EtOHnc2 | Galnc1 | Galnc2 |
| 12       | YAL018C | YPDcl2 | YPDcl3 | EtOHcl1 | -       | Galcl1 | YPDnc1 | YPDnc2 | YPDnc3 | YPDnc4 | EtOHnc1 | EtOHnc2 | Galnc1 | Galnc2 |
| 12 LCL2  | YLR104W | YPDcl2 | YPDcl3 | EtOHcl1 | -       | Galcl1 | YPDnc1 | YPDnc2 | YPDnc3 | YPDnc4 | EtOHnc1 | EtOHnc2 | Galnc1 | Galnc2 |
| 12 BER1  | YLR412W | -      | YPDcl3 | EtOHcl1 | EtOHcl2 | Galcl1 | YPDnc1 | YPDnc2 | YPDnc3 | YPDnc4 | EtOHnc1 | EtOHnc2 | Galnc1 | Galnc2 |
| 12 YIP3  | YNL044W | YPDcl2 | YPDcl3 | EtOHcl1 | EtOHcl2 | Galcl1 | -      | YPDnc2 | YPDnc3 | YPDnc4 | EtOHnc1 | EtOHnc2 | Galnc1 | Galnc2 |
| 12 RAD24 | YER173W | YPDcl2 | YPDcl3 | EtOHcl1 | -       | Galcl1 | YPDnc1 | YPDnc2 | YPDnc3 | YPDnc4 | EtOHnc1 | EtOHnc2 | Galnc1 | Galnc2 |
| 12 STI1  | YOR027W | YPDcl2 | YPDcl3 | EtOHcl1 | EtOHcl2 | Galcl1 | YPDnc1 | YPDnc2 | YPDnc3 | YPDnc4 | EtOHnc1 | -       | Galnc1 | Galnc2 |
| 12 CWC22 | YGR278W | -      | YPDcl3 | EtOHcl1 | EtOHcl2 | Galcl1 | YPDnc1 | YPDnc2 | YPDnc3 | YPDnc4 | EtOHnc1 | EtOHnc2 | Galnc1 | Galnc2 |
| 12       | YEL007W | YPDcl2 | YPDcl3 | EtOHcl1 | -       | Galcl1 | YPDnc1 | YPDnc2 | YPDnc3 | YPDnc4 | EtOHnc1 | EtOHnc2 | Galnc1 | Galnc2 |
| 12 YMC2  | YBR104W | YPDcl2 | YPDcl3 | EtOHcl1 | -       | Galcl1 | YPDnc1 | YPDnc2 | YPDnc3 | YPDnc4 | EtOHnc1 | EtOHnc2 | Galnc1 | Galnc2 |
| 12 CAB3  | YKL088W | -      | YPDcl3 | EtOHcl1 | EtOHcl2 | Galcl1 | YPDnc1 | YPDnc2 | YPDnc3 | YPDnc4 | EtOHnc1 | EtOHnc2 | Galnc1 | Galnc2 |
| 12       | YNR004W | YPDcl2 | -      | EtOHcl1 | EtOHcl2 | Galcl1 | YPDnc1 | YPDnc2 | YPDnc3 | YPDnc4 | EtOHnc1 | EtOHnc2 | Galnc1 | Galnc2 |
| 12       | YNL194C | YPDcl2 | YPDcl3 | EtOHcl1 | -       | Galcl1 | YPDnc1 | YPDnc2 | YPDnc3 | YPDnc4 | EtOHnc1 | EtOHnc2 | Galnc1 | Galnc2 |
| 12 SWM1  | YDR260C | -      | YPDcl3 | EtOHcl1 | EtOHcl2 | Galcl1 | YPDnc1 | YPDnc2 | YPDnc3 | YPDnc4 | EtOHnc1 | EtOHnc2 | Galnc1 | Galnc2 |
| 12 DAM1  | YGR113W | YPDcl2 | YPDcl3 | EtOHcl1 | -       | Galcl1 | YPDnc1 | YPDnc2 | YPDnc3 | YPDnc4 | EtOHnc1 | EtOHnc2 | Galnc1 | Galnc2 |
| 12       | YDR340W | YPDcl2 | YPDcl3 | EtOHcl1 | -       | Galcl1 | YPDnc1 | YPDnc2 | YPDnc3 | YPDnc4 | EtOHnc1 | EtOHnc2 | Galnc1 | Galnc2 |
| 12 ESC1  | YMR219W | YPDcl2 | YPDcl3 | EtOHcl1 | -       | Galcl1 | YPDnc1 | YPDnc2 | YPDnc3 | YPDnc4 | EtOHnc1 | EtOHnc2 | Galnc1 | Galnc2 |
| 12 REV7  | YIL139C | YPDcl2 | YPDcl3 | EtOHcl1 | -       | Galcl1 | YPDnc1 | YPDnc2 | YPDnc3 | YPDnc4 | EtOHnc1 | EtOHnc2 | Galnc1 | Galnc2 |
| 12 PXA2  | YKL188C | YPDcl2 | YPDcl3 | EtOHcl1 | -       | Galcl1 | YPDnc1 | YPDnc2 | YPDnc3 | YPDnc4 | EtOHnc1 | EtOHnc2 | Galnc1 | Galnc2 |
| 12       | YDL183C | YPDcl2 | YPDcl3 | EtOHcl1 | EtOHcl2 | Galcl1 | YPDnc1 | YPDnc2 | YPDnc3 | YPDnc4 | EtOHnc1 | -       | Galnc1 | Galnc2 |



|    |            |         |        |         |         |         |        |        |        |        |         |         |         |        |        |
|----|------------|---------|--------|---------|---------|---------|--------|--------|--------|--------|---------|---------|---------|--------|--------|
| 12 | YER140W    | YPDcl2  | YPDcl3 | EtOHcl1 | EtOHcl2 | Galcl1  | YPDnc1 | -      | YPDnc3 | YPDnc4 | EtOHnc1 | EtOHnc2 | Galnc1  | Galnc2 |        |
| 12 | PYK2       | YOR347C | YPDcl2 | YPDcl3  | EtOHcl1 | EtOHcl2 | Galcl1 | YPDnc1 | YPDnc2 | YPDnc3 | -       | EtOHnc1 | EtOHnc2 | Galnc1 | Galnc2 |
| 12 | AAT2       | YLR027C | YPDcl2 | YPDcl3  | EtOHcl1 | -       | Galcl1 | YPDnc1 | YPDnc2 | YPDnc3 | YPDnc4  | EtOHnc1 | EtOHnc2 | Galnc1 | Galnc2 |
| 12 | CSI2       | YOL007C | YPDcl2 | -       | EtOHcl1 | EtOHcl2 | Galcl1 | YPDnc1 | YPDnc2 | YPDnc3 | YPDnc4  | EtOHnc1 | EtOHnc2 | Galnc1 | Galnc2 |
| 12 | YML047W-   | YPDcl2  | YPDcl3 | EtOHcl1 | EtOHcl2 | Galcl1  | YPDnc1 | YPDnc2 | YPDnc3 | YPDnc4 | -       | EtOHnc2 | Galnc1  | Galnc2 |        |
| 12 | NOP12      | YOL041C | YPDcl2 | -       | EtOHcl1 | EtOHcl2 | Galcl1 | YPDnc1 | YPDnc2 | YPDnc3 | YPDnc4  | EtOHnc1 | EtOHnc2 | Galnc1 | Galnc2 |
| 12 | YMR122C    | YPDcl2  | YPDcl3 | EtOHcl1 | -       | Galcl1  | YPDnc1 | YPDnc2 | YPDnc3 | YPDnc4 | EtOHnc1 | EtOHnc2 | Galnc1  | Galnc2 |        |
| 12 | GLY1       | YEL046C | YPDcl2 | -       | EtOHcl1 | EtOHcl2 | Galcl1 | YPDnc1 | YPDnc2 | YPDnc3 | YPDnc4  | EtOHnc1 | EtOHnc2 | Galnc1 | Galnc2 |
| 12 | YMR307C-/- | -       | YPDcl3 | EtOHcl1 | EtOHcl2 | Galcl1  | YPDnc1 | YPDnc2 | YPDnc3 | YPDnc4 | EtOHnc1 | EtOHnc2 | Galnc1  | Galnc2 |        |
| 12 | YLR392C    | YPDcl2  | YPDcl3 | EtOHcl1 | -       | Galcl1  | YPDnc1 | YPDnc2 | YPDnc3 | YPDnc4 | EtOHnc1 | EtOHnc2 | Galnc1  | Galnc2 |        |
| 12 | PRP38      | YGR075C | YPDcl2 | YPDcl3  | EtOHcl1 | EtOHcl2 | Galcl1 | -      | YPDnc2 | YPDnc3 | YPDnc4  | EtOHnc1 | EtOHnc2 | Galnc1 | Galnc2 |
| 12 | PAC2       | YER007W | YPDcl2 | YPDcl3  | EtOHcl1 | EtOHcl2 | Galcl1 | YPDnc1 | YPDnc2 | YPDnc3 | YPDnc4  | -       | EtOHnc2 | Galnc1 | Galnc2 |
| 12 | NUR1       | YDL089W | YPDcl2 | YPDcl3  | EtOHcl1 | EtOHcl2 | Galcl1 | YPDnc1 | YPDnc2 | YPDnc3 | -       | EtOHnc1 | EtOHnc2 | Galnc1 | Galnc2 |
| 12 | MAD1       | YGL086W | YPDcl2 | YPDcl3  | EtOHcl1 | -       | Galcl1 | YPDnc1 | YPDnc2 | YPDnc3 | YPDnc4  | EtOHnc1 | EtOHnc2 | Galnc1 | Galnc2 |
| 12 | YMR074C    | YPDcl2  | -      | EtOHcl1 | EtOHcl2 | Galcl1  | YPDnc1 | YPDnc2 | YPDnc3 | YPDnc4 | EtOHnc1 | EtOHnc2 | Galnc1  | Galnc2 |        |
| 12 | YDR341C    | YPDcl2  | YPDcl3 | EtOHcl1 | -       | Galcl1  | YPDnc1 | YPDnc2 | YPDnc3 | YPDnc4 | EtOHnc1 | EtOHnc2 | Galnc1  | Galnc2 |        |
| 12 | TMA23      | YMR269W | YPDcl2 | -       | EtOHcl1 | EtOHcl2 | Galcl1 | YPDnc1 | YPDnc2 | YPDnc3 | YPDnc4  | EtOHnc1 | EtOHnc2 | Galnc1 | Galnc2 |
| 12 | OPI1       | YHL020C | YPDcl2 | YPDcl3  | EtOHcl1 | -       | Galcl1 | YPDnc1 | YPDnc2 | YPDnc3 | YPDnc4  | EtOHnc1 | EtOHnc2 | Galnc1 | Galnc2 |
| 12 | SST2       | YLR452C | YPDcl2 | YPDcl3  | EtOHcl1 | EtOHcl2 | Galcl1 | YPDnc1 | YPDnc2 | YPDnc3 | -       | EtOHnc1 | EtOHnc2 | Galnc1 | Galnc2 |
| 12 | TAF4       | YMR005W | YPDcl2 | YPDcl3  | EtOHcl1 | -       | Galcl1 | YPDnc1 | YPDnc2 | YPDnc3 | YPDnc4  | EtOHnc1 | EtOHnc2 | Galnc1 | Galnc2 |
| 12 | YCR015C    | YPDcl2  | YPDcl3 | EtOHcl1 | EtOHcl2 | Galcl1  | -      | YPDnc2 | YPDnc3 | YPDnc4 | EtOHnc1 | EtOHnc2 | Galnc1  | Galnc2 |        |
| 12 | YMR135W-   | -       | YPDcl3 | EtOHcl1 | EtOHcl2 | Galcl1  | YPDnc1 | YPDnc2 | YPDnc3 | YPDnc4 | EtOHnc1 | EtOHnc2 | Galnc1  | Galnc2 |        |
| 12 | OPI6       | YDL096C | -      | YPDcl3  | EtOHcl1 | EtOHcl2 | Galcl1 | YPDnc1 | YPDnc2 | YPDnc3 | YPDnc4  | EtOHnc1 | EtOHnc2 | Galnc1 | Galnc2 |
| 12 | YGR149W    | YPDcl2  | YPDcl3 | EtOHcl1 | EtOHcl2 | Galcl1  | YPDnc1 | YPDnc2 | YPDnc3 | YPDnc4 | EtOHnc1 | EtOHnc2 | -       | Galnc2 |        |
| 12 | YGL258W-   | YPDcl2  | YPDcl3 | EtOHcl1 | -       | Galcl1  | YPDnc1 | YPDnc2 | YPDnc3 | YPDnc4 | EtOHnc1 | EtOHnc2 | Galnc1  | Galnc2 |        |
| 12 | EAF5       | YEL018W | YPDcl2 | YPDcl3  | EtOHcl1 | EtOHcl2 | -      | YPDnc1 | YPDnc2 | YPDnc3 | YPDnc4  | EtOHnc1 | EtOHnc2 | Galnc1 | Galnc2 |
| 12 | GPM2       | YDL021W | YPDcl2 | YPDcl3  | EtOHcl1 | EtOHcl2 | Galcl1 | YPDnc1 | YPDnc2 | YPDnc3 | YPDnc4  | EtOHnc1 | -       | Galnc1 | Galnc2 |
| 12 | YBR074W    | YPDcl2  | YPDcl3 | -       | EtOHcl2 | Galcl1  | YPDnc1 | YPDnc2 | YPDnc3 | YPDnc4 | EtOHnc1 | EtOHnc2 | Galnc1  | Galnc2 |        |
| 12 | YKR015C    | YPDcl2  | YPDcl3 | EtOHcl1 | -       | Galcl1  | YPDnc1 | YPDnc2 | YPDnc3 | YPDnc4 | EtOHnc1 | EtOHnc2 | Galnc1  | Galnc2 |        |
| 12 | MEC1       | YBR136W | YPDcl2 | -       | EtOHcl1 | EtOHcl2 | Galcl1 | YPDnc1 | YPDnc2 | YPDnc3 | YPDnc4  | EtOHnc1 | EtOHnc2 | Galnc1 | Galnc2 |
| 12 | YGR018C    | -       | YPDcl3 | EtOHcl1 | EtOHcl2 | Galcl1  | YPDnc1 | YPDnc2 | YPDnc3 | YPDnc4 | EtOHnc1 | EtOHnc2 | Galnc1  | Galnc2 |        |
| 12 | RCY1       | YJL204C | YPDcl2 | -       | EtOHcl1 | EtOHcl2 | Galcl1 | YPDnc1 | YPDnc2 | YPDnc3 | YPDnc4  | EtOHnc1 | EtOHnc2 | Galnc1 | Galnc2 |
| 12 | YMR294W-   | YPDcl2  | YPDcl3 | EtOHcl1 | EtOHcl2 | Galcl1  | YPDnc1 | YPDnc2 | YPDnc3 | -      | EtOHnc1 | EtOHnc2 | Galnc1  | Galnc2 |        |
| 12 | RIM2       | YBR192W | YPDcl2 | -       | EtOHcl1 | EtOHcl2 | Galcl1 | YPDnc1 | YPDnc2 | YPDnc3 | YPDnc4  | EtOHnc1 | EtOHnc2 | Galnc1 | Galnc2 |

|    |         |           |        |         |         |         |        |        |        |        |         |         |         |        |        |
|----|---------|-----------|--------|---------|---------|---------|--------|--------|--------|--------|---------|---------|---------|--------|--------|
| 12 | YGR160W | YPDcl2    | YPDcl3 | EtOHcl1 | -       | Galcl1  | YPDnc1 | YPDnc2 | YPDnc3 | YPDnc4 | EtOHnc1 | EtOHnc2 | Galnc1  | Galnc2 |        |
| 12 | YGR017W | -         | YPDcl3 | EtOHcl1 | EtOHcl2 | Galcl1  | YPDnc1 | YPDnc2 | YPDnc3 | YPDnc4 | EtOHnc1 | EtOHnc2 | Galnc1  | Galnc2 |        |
| 12 | AYR1    | YIL124W   | -      | YPDcl3  | EtOHcl1 | EtOHcl2 | Galcl1 | YPDnc1 | YPDnc2 | YPDnc3 | YPDnc4  | EtOHnc1 | EtOHnc2 | Galnc1 | Galnc2 |
| 12 | RRP9    | YPR137W   | YPDcl2 | -       | EtOHcl1 | EtOHcl2 | Galcl1 | YPDnc1 | YPDnc2 | YPDnc3 | YPDnc4  | EtOHnc1 | EtOHnc2 | Galnc1 | Galnc2 |
| 12 | RPL9B   | YNL067W   | -      | YPDcl3  | EtOHcl1 | EtOHcl2 | Galcl1 | YPDnc1 | YPDnc2 | YPDnc3 | YPDnc4  | EtOHnc1 | EtOHnc2 | Galnc1 | Galnc2 |
| 12 | LPE10   | YPL060W   | YPDcl2 | YPDcl3  | -       | EtOHcl2 | Galcl1 | YPDnc1 | YPDnc2 | YPDnc3 | YPDnc4  | EtOHnc1 | EtOHnc2 | Galnc1 | Galnc2 |
| 12 | TTI1    | YKL033W   | YPDcl2 | -       | EtOHcl1 | EtOHcl2 | Galcl1 | YPDnc1 | YPDnc2 | YPDnc3 | YPDnc4  | EtOHnc1 | EtOHnc2 | Galnc1 | Galnc2 |
| 12 | YLR049C | -         | YPDcl3 | EtOHcl1 | EtOHcl2 | Galcl1  | YPDnc1 | YPDnc2 | YPDnc3 | YPDnc4 | EtOHnc1 | EtOHnc2 | Galnc1  | Galnc2 |        |
| 12 | SPT16   | YGL207W   | YPDcl2 | YPDcl3  | -       | EtOHcl2 | Galcl1 | YPDnc1 | YPDnc2 | YPDnc3 | YPDnc4  | EtOHnc1 | EtOHnc2 | Galnc1 | Galnc2 |
| 12 | NKP2    | YLR315W   | -      | YPDcl3  | EtOHcl1 | EtOHcl2 | Galcl1 | YPDnc1 | YPDnc2 | YPDnc3 | YPDnc4  | EtOHnc1 | EtOHnc2 | Galnc1 | Galnc2 |
| 12 | KEG1    | YFR042W   | YPDcl2 | YPDcl3  | EtOHcl1 | EtOHcl2 | Galcl1 | YPDnc1 | YPDnc2 | YPDnc3 | YPDnc4  | EtOHnc1 | -       | Galnc1 | Galnc2 |
| 12 | SRP68   | YPL243W   | YPDcl2 | YPDcl3  | -       | EtOHcl2 | Galcl1 | YPDnc1 | YPDnc2 | YPDnc3 | YPDnc4  | EtOHnc1 | EtOHnc2 | Galnc1 | Galnc2 |
| 12 | GAL7    | YBR018C   | YPDcl2 | YPDcl3  | EtOHcl1 | EtOHcl2 | -      | YPDnc1 | YPDnc2 | YPDnc3 | YPDnc4  | EtOHnc1 | EtOHnc2 | Galnc1 | Galnc2 |
| 12 | MSN2    | YMR037C   | YPDcl2 | -       | EtOHcl1 | EtOHcl2 | Galcl1 | YPDnc1 | YPDnc2 | YPDnc3 | YPDnc4  | EtOHnc1 | EtOHnc2 | Galnc1 | Galnc2 |
| 12 | MSA1    | YOR066W   | -      | YPDcl3  | EtOHcl1 | EtOHcl2 | Galcl1 | YPDnc1 | YPDnc2 | YPDnc3 | YPDnc4  | EtOHnc1 | EtOHnc2 | Galnc1 | Galnc2 |
| 12 | HMS2    | YJR147W   | -      | YPDcl3  | EtOHcl1 | EtOHcl2 | Galcl1 | YPDnc1 | YPDnc2 | YPDnc3 | YPDnc4  | EtOHnc1 | EtOHnc2 | Galnc1 | Galnc2 |
| 12 | NUP192  | YJL039C   | YPDcl2 | YPDcl3  | EtOHcl1 | EtOHcl2 | Galcl1 | YPDnc1 | YPDnc2 | YPDnc3 | YPDnc4  | -       | EtOHnc2 | Galnc1 | Galnc2 |
| 12 | YNL200C | -         | YPDcl3 | EtOHcl1 | EtOHcl2 | Galcl1  | YPDnc1 | YPDnc2 | YPDnc3 | YPDnc4 | EtOHnc1 | EtOHnc2 | Galnc1  | Galnc2 |        |
| 12 | THI4    | YGR144W   | YPDcl2 | YPDcl3  | -       | EtOHcl2 | Galcl1 | YPDnc1 | YPDnc2 | YPDnc3 | YPDnc4  | EtOHnc1 | EtOHnc2 | Galnc1 | Galnc2 |
| 12 | PAC1    | YOR269W   | YPDcl2 | YPDcl3  | EtOHcl1 | EtOHcl2 | Galcl1 | YPDnc1 | YPDnc2 | YPDnc3 | YPDnc4  | EtOHnc1 | -       | Galnc1 | Galnc2 |
| 12 | SVS1    | YPL163C   | YPDcl2 | YPDcl3  | -       | EtOHcl2 | Galcl1 | YPDnc1 | YPDnc2 | YPDnc3 | YPDnc4  | EtOHnc1 | EtOHnc2 | Galnc1 | Galnc2 |
| 12 | RPL37B  | YDR500C   | YPDcl2 | YPDcl3  | EtOHcl1 | EtOHcl2 | Galcl1 | YPDnc1 | YPDnc2 | YPDnc3 | YPDnc4  | EtOHnc1 | -       | Galnc1 | Galnc2 |
| 12 | YMR258C | YPDcl2    | YPDcl3 | EtOHcl1 | EtOHcl2 | Galcl1  | YPDnc1 | YPDnc2 | YPDnc3 | YPDnc4 | EtOHnc1 | EtOHnc2 | Galnc1  | -      |        |
| 12 | POB3    | YML069W   | YPDcl2 | YPDcl3  | EtOHcl1 | EtOHcl2 | Galcl1 | YPDnc1 | YPDnc2 | YPDnc3 | YPDnc4  | -       | EtOHnc2 | Galnc1 | Galnc2 |
| 12 | YNL266W | YPDcl2    | -      | EtOHcl1 | EtOHcl2 | Galcl1  | YPDnc1 | YPDnc2 | YPDnc3 | YPDnc4 | EtOHnc1 | EtOHnc2 | Galnc1  | Galnc2 |        |
| 12 | ADE6    | YGR061C   | YPDcl2 | YPDcl3  | EtOHcl1 | -       | Galcl1 | YPDnc1 | YPDnc2 | YPDnc3 | YPDnc4  | EtOHnc1 | EtOHnc2 | Galnc1 | Galnc2 |
| 12 | TUB3    | YML124C   | YPDcl2 | YPDcl3  | EtOHcl1 | EtOHcl2 | Galcl1 | YPDnc1 | YPDnc2 | YPDnc3 | YPDnc4  | EtOHnc1 | -       | Galnc1 | Galnc2 |
| 12 | DAD4    | YDR320C-A | YPDcl2 | YPDcl3  | -       | EtOHcl2 | Galcl1 | YPDnc1 | YPDnc2 | YPDnc3 | YPDnc4  | EtOHnc1 | EtOHnc2 | Galnc1 | Galnc2 |
| 12 | PEX25   | YPL112C   | -      | YPDcl3  | EtOHcl1 | EtOHcl2 | Galcl1 | YPDnc1 | YPDnc2 | YPDnc3 | YPDnc4  | EtOHnc1 | EtOHnc2 | Galnc1 | Galnc2 |
| 12 | YAP3    | YHL009C   | YPDcl2 | YPDcl3  | EtOHcl1 | EtOHcl2 | -      | YPDnc1 | YPDnc2 | YPDnc3 | YPDnc4  | EtOHnc1 | EtOHnc2 | Galnc1 | Galnc2 |
| 12 | YOL036W | -         | YPDcl3 | EtOHcl1 | EtOHcl2 | Galcl1  | YPDnc1 | YPDnc2 | YPDnc3 | YPDnc4 | EtOHnc1 | EtOHnc2 | Galnc1  | Galnc2 |        |
| 12 | ABZ1    | YNR033W   | YPDcl2 | YPDcl3  | EtOHcl1 | -       | Galcl1 | YPDnc1 | YPDnc2 | YPDnc3 | YPDnc4  | EtOHnc1 | EtOHnc2 | Galnc1 | Galnc2 |
| 12 | ROX3    | YBL093C   | YPDcl2 | YPDcl3  | EtOHcl1 | EtOHcl2 | Galcl1 | YPDnc1 | YPDnc2 | YPDnc3 | -       | EtOHnc1 | EtOHnc2 | Galnc1 | Galnc2 |
| 12 | MDM12   | YOL009C   | YPDcl2 | YPDcl3  | EtOHcl1 | -       | Galcl1 | YPDnc1 | YPDnc2 | YPDnc3 | YPDnc4  | EtOHnc1 | EtOHnc2 | Galnc1 | Galnc2 |

|    |        |            |        |        |         |         |        |        |        |        |        |         |         |        |        |
|----|--------|------------|--------|--------|---------|---------|--------|--------|--------|--------|--------|---------|---------|--------|--------|
| 12 | SWT21  | YNL187W    | YPDcl2 | YPDcl3 | EtOHcl1 | -       | Galcl1 | YPDnc1 | YPDnc2 | YPDnc3 | YPDnc4 | EtOHnc1 | EtOHnc2 | Galnc1 | Galnc2 |
| 12 |        | YEL067C    | YPDcl2 | YPDcl3 | EtOHcl1 | -       | Galcl1 | YPDnc1 | YPDnc2 | YPDnc3 | YPDnc4 | EtOHnc1 | EtOHnc2 | Galnc1 | Galnc2 |
| 12 |        | YAL056C-A  | YPDcl2 | YPDcl3 | -       | EtOHcl2 | Galcl1 | YPDnc1 | YPDnc2 | YPDnc3 | YPDnc4 | EtOHnc1 | EtOHnc2 | Galnc1 | Galnc2 |
| 12 | SEC61  | YLR378C    | YPDcl2 | YPDcl3 | EtOHcl1 | -       | Galcl1 | YPDnc1 | YPDnc2 | YPDnc3 | YPDnc4 | EtOHnc1 | EtOHnc2 | Galnc1 | Galnc2 |
| 12 | POL4   | YCR014C    | YPDcl2 | YPDcl3 | EtOHcl1 | EtOHcl2 | Galcl1 | -      | YPDnc2 | YPDnc3 | YPDnc4 | EtOHnc1 | EtOHnc2 | Galnc1 | Galnc2 |
| 12 | MRPL19 | YNL185C    | YPDcl2 | YPDcl3 | EtOHcl1 | EtOHcl2 | Galcl1 | YPDnc1 | YPDnc2 | YPDnc3 | YPDnc4 | EtOHnc1 | EtOHnc2 | Galnc1 | -      |
| 12 | CRH1   | YGR189C    | YPDcl2 | YPDcl3 | EtOHcl1 | EtOHcl2 | Galcl1 | -      | YPDnc2 | YPDnc3 | YPDnc4 | EtOHnc1 | EtOHnc2 | Galnc1 | Galnc2 |
| 12 | HXT7   | YDR342C    | YPDcl2 | YPDcl3 | EtOHcl1 | -       | Galcl1 | YPDnc1 | YPDnc2 | YPDnc3 | YPDnc4 | EtOHnc1 | EtOHnc2 | Galnc1 | Galnc2 |
| 12 | FOL2   | YGR267C    | YPDcl2 | YPDcl3 | EtOHcl1 | EtOHcl2 | Galcl1 | YPDnc1 | YPDnc2 | YPDnc3 | YPDnc4 | EtOHnc1 | EtOHnc2 | -      | Galnc2 |
| 12 | JLP2   | YMR132C    | YPDcl2 | YPDcl3 | EtOHcl1 | -       | Galcl1 | YPDnc1 | YPDnc2 | YPDnc3 | YPDnc4 | EtOHnc1 | EtOHnc2 | Galnc1 | Galnc2 |
| 12 | MTL1   | YGR023W    | -      | YPDcl3 | EtOHcl1 | EtOHcl2 | Galcl1 | YPDnc1 | YPDnc2 | YPDnc3 | YPDnc4 | EtOHnc1 | EtOHnc2 | Galnc1 | Galnc2 |
| 12 | DAP1   | YPL170W    | -      | YPDcl3 | EtOHcl1 | EtOHcl2 | Galcl1 | YPDnc1 | YPDnc2 | YPDnc3 | YPDnc4 | EtOHnc1 | EtOHnc2 | Galnc1 | Galnc2 |
| 12 | HIS7   | YBR248C    | -      | YPDcl3 | EtOHcl1 | EtOHcl2 | Galcl1 | YPDnc1 | YPDnc2 | YPDnc3 | YPDnc4 | EtOHnc1 | EtOHnc2 | Galnc1 | Galnc2 |
| 12 | MSC2   | YDR205W    | -      | YPDcl3 | EtOHcl1 | EtOHcl2 | Galcl1 | YPDnc1 | YPDnc2 | YPDnc3 | YPDnc4 | EtOHnc1 | EtOHnc2 | Galnc1 | Galnc2 |
| 12 | PDX1   | YGR193C    | YPDcl2 | YPDcl3 | EtOHcl1 | EtOHcl2 | Galcl1 | YPDnc1 | YPDnc2 | YPDnc3 | YPDnc4 | EtOHnc1 | EtOHnc2 | Galnc1 | -      |
| 12 |        | YOL029C    | -      | YPDcl3 | EtOHcl1 | EtOHcl2 | Galcl1 | YPDnc1 | YPDnc2 | YPDnc3 | YPDnc4 | EtOHnc1 | EtOHnc2 | Galnc1 | Galnc2 |
| 12 | VPS71  | YML041C    | YPDcl2 | YPDcl3 | EtOHcl1 | EtOHcl2 | Galcl1 | YPDnc1 | YPDnc2 | YPDnc3 | YPDnc4 | EtOHnc1 | EtOHnc2 | -      | Galnc2 |
| 12 | NVJ1   | YHR195W    | YPDcl2 | YPDcl3 | -       | EtOHcl2 | Galcl1 | YPDnc1 | YPDnc2 | YPDnc3 | YPDnc4 | EtOHnc1 | EtOHnc2 | Galnc1 | Galnc2 |
| 12 |        | YKL044W    | YPDcl2 | YPDcl3 | EtOHcl1 | EtOHcl2 | Galcl1 | YPDnc1 | YPDnc2 | YPDnc3 | YPDnc4 | EtOHnc1 | -       | Galnc1 | Galnc2 |
| 12 |        | YOR296W    | YPDcl2 | YPDcl3 | EtOHcl1 | EtOHcl2 | Galcl1 | -      | YPDnc2 | YPDnc3 | YPDnc4 | EtOHnc1 | EtOHnc2 | Galnc1 | Galnc2 |
| 12 | RTC5   | YOR118W    | YPDcl2 | YPDcl3 | EtOHcl1 | EtOHcl2 | -      | YPDnc1 | YPDnc2 | YPDnc3 | YPDnc4 | EtOHnc1 | EtOHnc2 | Galnc1 | Galnc2 |
| 12 | GAL10  | YBR019C    | YPDcl2 | YPDcl3 | EtOHcl1 | EtOHcl2 | -      | YPDnc1 | YPDnc2 | YPDnc3 | YPDnc4 | EtOHnc1 | EtOHnc2 | Galnc1 | Galnc2 |
| 12 | ABP140 | YOR239W    | -      | YPDcl3 | EtOHcl1 | EtOHcl2 | Galcl1 | YPDnc1 | YPDnc2 | YPDnc3 | YPDnc4 | EtOHnc1 | EtOHnc2 | Galnc1 | Galnc2 |
| 12 |        | YNL103W-/- | -      | YPDcl3 | EtOHcl1 | EtOHcl2 | Galcl1 | YPDnc1 | YPDnc2 | YPDnc3 | YPDnc4 | EtOHnc1 | EtOHnc2 | Galnc1 | Galnc2 |
| 12 | PLB2   | YMR006C    | YPDcl2 | YPDcl3 | EtOHcl1 | -       | Galcl1 | YPDnc1 | YPDnc2 | YPDnc3 | YPDnc4 | EtOHnc1 | EtOHnc2 | Galnc1 | Galnc2 |
| 12 | PAI3   | YMR174C    | YPDcl2 | YPDcl3 | EtOHcl1 | EtOHcl2 | Galcl1 | YPDnc1 | YPDnc2 | YPDnc3 | YPDnc4 | EtOHnc1 | -       | Galnc1 | Galnc2 |
| 12 | PAP1   | YKR002W    | YPDcl2 | YPDcl3 | -       | EtOHcl2 | Galcl1 | YPDnc1 | YPDnc2 | YPDnc3 | YPDnc4 | EtOHnc1 | EtOHnc2 | Galnc1 | Galnc2 |
| 12 | TVP38  | YKR088C    | YPDcl2 | YPDcl3 | EtOHcl1 | EtOHcl2 | Galcl1 | YPDnc1 | YPDnc2 | YPDnc3 | YPDnc4 | EtOHnc1 | -       | Galnc1 | Galnc2 |
| 12 | UIP5   | YKR044W    | -      | YPDcl3 | EtOHcl1 | EtOHcl2 | Galcl1 | YPDnc1 | YPDnc2 | YPDnc3 | YPDnc4 | EtOHnc1 | EtOHnc2 | Galnc1 | Galnc2 |
| 12 | ADE12  | YNL220W    | YPDcl2 | YPDcl3 | -       | EtOHcl2 | Galcl1 | YPDnc1 | YPDnc2 | YPDnc3 | YPDnc4 | EtOHnc1 | EtOHnc2 | Galnc1 | Galnc2 |
| 12 | GGA2   | YHR108W    | YPDcl2 | YPDcl3 | EtOHcl1 | -       | Galcl1 | YPDnc1 | YPDnc2 | YPDnc3 | YPDnc4 | EtOHnc1 | EtOHnc2 | Galnc1 | Galnc2 |
| 12 | DYN3   | YMR299C    | YPDcl2 | YPDcl3 | EtOHcl1 | EtOHcl2 | Galcl1 | YPDnc1 | YPDnc2 | -      | YPDnc4 | EtOHnc1 | EtOHnc2 | Galnc1 | Galnc2 |
| 12 | BCK1   | YJL095W    | YPDcl2 | YPDcl3 | -       | EtOHcl2 | Galcl1 | YPDnc1 | YPDnc2 | YPDnc3 | YPDnc4 | EtOHnc1 | EtOHnc2 | Galnc1 | Galnc2 |
| 12 |        | YML053C    | YPDcl2 | YPDcl3 | EtOHcl1 | EtOHcl2 | -      | YPDnc1 | YPDnc2 | YPDnc3 | YPDnc4 | EtOHnc1 | EtOHnc2 | Galnc1 | Galnc2 |

|    |        |           |        |        |         |         |        |        |        |        |        |         |         |        |        |
|----|--------|-----------|--------|--------|---------|---------|--------|--------|--------|--------|--------|---------|---------|--------|--------|
| 12 | MRPL32 | YCR003W   | YPDcl2 | YPDcl3 | EtOHcl1 | EtOHcl2 | Galcl1 | YPDnc1 | YPDnc2 | YPDnc3 | YPDnc4 | EtOHnc1 | -       | Galnc1 | Galnc2 |
| 12 | RAD50  | YNL250W   | YPDcl2 | -      | EtOHcl1 | EtOHcl2 | Galcl1 | YPDnc1 | YPDnc2 | YPDnc3 | YPDnc4 | EtOHnc1 | EtOHnc2 | Galnc1 | Galnc2 |
| 12 |        | YDR269C   | YPDcl2 | YPDcl3 | EtOHcl1 | EtOHcl2 | -      | YPDnc1 | YPDnc2 | YPDnc3 | YPDnc4 | EtOHnc1 | EtOHnc2 | Galnc1 | Galnc2 |
| 12 | MRPL15 | YLR312W-  | YPDcl2 | YPDcl3 | EtOHcl1 | -       | Galcl1 | YPDnc1 | YPDnc2 | YPDnc3 | YPDnc4 | EtOHnc1 | EtOHnc2 | Galnc1 | Galnc2 |
| 12 | GAA1   | YLR088W   | YPDcl2 | YPDcl3 | EtOHcl1 | EtOHcl2 | Galcl1 | YPDnc1 | YPDnc2 | YPDnc3 | -      | EtOHnc1 | EtOHnc2 | Galnc1 | Galnc2 |
| 12 | SIM1   | YIL123W   | YPDcl2 | YPDcl3 | EtOHcl1 | -       | Galcl1 | YPDnc1 | YPDnc2 | YPDnc3 | YPDnc4 | EtOHnc1 | EtOHnc2 | Galnc1 | Galnc2 |
| 12 |        | YER090C-A | -      | YPDcl3 | EtOHcl1 | EtOHcl2 | Galcl1 | YPDnc1 | YPDnc2 | YPDnc3 | YPDnc4 | EtOHnc1 | EtOHnc2 | Galnc1 | Galnc2 |
| 12 |        | YGR121W-  | YPDcl2 | YPDcl3 | EtOHcl1 | EtOHcl2 | Galcl1 | YPDnc1 | YPDnc2 | YPDnc3 | YPDnc4 | EtOHnc1 | -       | Galnc1 | Galnc2 |
| 12 | POM152 | YMR129W   | YPDcl2 | YPDcl3 | EtOHcl1 | EtOHcl2 | -      | YPDnc1 | YPDnc2 | YPDnc3 | YPDnc4 | EtOHnc1 | EtOHnc2 | Galnc1 | Galnc2 |
| 12 | ACS2   | YLR153C   | YPDcl2 | YPDcl3 | EtOHcl1 | -       | Galcl1 | YPDnc1 | YPDnc2 | YPDnc3 | YPDnc4 | EtOHnc1 | EtOHnc2 | Galnc1 | Galnc2 |
| 12 | YGK3   | YOL128C   | YPDcl2 | -      | EtOHcl1 | EtOHcl2 | Galcl1 | YPDnc1 | YPDnc2 | YPDnc3 | YPDnc4 | EtOHnc1 | EtOHnc2 | Galnc1 | Galnc2 |
| 12 | BUD20  | YLR074C   | YPDcl2 | YPDcl3 | EtOHcl1 | EtOHcl2 | Galcl1 | -      | YPDnc2 | YPDnc3 | YPDnc4 | EtOHnc1 | EtOHnc2 | Galnc1 | Galnc2 |
| 12 |        | YJL016W   | YPDcl2 | -      | EtOHcl1 | EtOHcl2 | Galcl1 | YPDnc1 | YPDnc2 | YPDnc3 | YPDnc4 | EtOHnc1 | EtOHnc2 | Galnc1 | Galnc2 |
| 12 | HRR25  | YPL204W   | YPDcl2 | YPDcl3 | EtOHcl1 | EtOHcl2 | Galcl1 | YPDnc1 | YPDnc2 | YPDnc3 | YPDnc4 | EtOHnc1 | -       | Galnc1 | Galnc2 |
| 12 |        | YLR122C   | YPDcl2 | YPDcl3 | EtOHcl1 | -       | Galcl1 | YPDnc1 | YPDnc2 | YPDnc3 | YPDnc4 | EtOHnc1 | EtOHnc2 | Galnc1 | Galnc2 |
| 12 | RPL23A | YBL087C   | YPDcl2 | YPDcl3 | EtOHcl1 | -       | Galcl1 | YPDnc1 | YPDnc2 | YPDnc3 | YPDnc4 | EtOHnc1 | EtOHnc2 | Galnc1 | Galnc2 |
| 12 | IMP2   | YMR035W   | YPDcl2 | -      | EtOHcl1 | EtOHcl2 | Galcl1 | YPDnc1 | YPDnc2 | YPDnc3 | YPDnc4 | EtOHnc1 | EtOHnc2 | Galnc1 | Galnc2 |
| 12 |        | YIL142C-A | -      | YPDcl3 | EtOHcl1 | EtOHcl2 | Galcl1 | YPDnc1 | YPDnc2 | YPDnc3 | YPDnc4 | EtOHnc1 | EtOHnc2 | Galnc1 | Galnc2 |
| 12 | MGM1   | YOR211C   | YPDcl2 | -      | EtOHcl1 | EtOHcl2 | Galcl1 | YPDnc1 | YPDnc2 | YPDnc3 | YPDnc4 | EtOHnc1 | EtOHnc2 | Galnc1 | Galnc2 |
| 12 | LOT5   | YKL183W   | YPDcl2 | YPDcl3 | EtOHcl1 | EtOHcl2 | Galcl1 | YPDnc1 | YPDnc2 | YPDnc3 | -      | EtOHnc1 | EtOHnc2 | Galnc1 | Galnc2 |
| 12 | RPS23A | YGR118W   | -      | YPDcl3 | EtOHcl1 | EtOHcl2 | Galcl1 | YPDnc1 | YPDnc2 | YPDnc3 | YPDnc4 | EtOHnc1 | EtOHnc2 | Galnc1 | Galnc2 |
| 12 | ARO1   | YDR127W   | YPDcl2 | YPDcl3 | EtOHcl1 | EtOHcl2 | Galcl1 | YPDnc1 | YPDnc2 | YPDnc3 | -      | EtOHnc1 | EtOHnc2 | Galnc1 | Galnc2 |
| 12 | MTG1   | YMR097C   | YPDcl2 | YPDcl3 | EtOHcl1 | EtOHcl2 | Galcl1 | YPDnc1 | YPDnc2 | YPDnc3 | YPDnc4 | EtOHnc1 | -       | Galnc1 | Galnc2 |
| 12 |        | YBR051W   | YPDcl2 | YPDcl3 | EtOHcl1 | -       | Galcl1 | YPDnc1 | YPDnc2 | YPDnc3 | YPDnc4 | EtOHnc1 | EtOHnc2 | Galnc1 | Galnc2 |
| 12 | RSC58  | YLR033W   | YPDcl2 | YPDcl3 | EtOHcl1 | -       | Galcl1 | YPDnc1 | YPDnc2 | YPDnc3 | YPDnc4 | EtOHnc1 | EtOHnc2 | Galnc1 | Galnc2 |
| 12 | ARN1   | YHL040C   | YPDcl2 | YPDcl3 | EtOHcl1 | EtOHcl2 | Galcl1 | YPDnc1 | YPDnc2 | YPDnc3 | -      | EtOHnc1 | EtOHnc2 | Galnc1 | Galnc2 |
| 12 | RPL24B | YGR148C   | YPDcl2 | YPDcl3 | EtOHcl1 | EtOHcl2 | Galcl1 | YPDnc1 | YPDnc2 | YPDnc3 | YPDnc4 | EtOHnc1 | EtOHnc2 | Galnc1 | -      |
| 12 |        | YGR242W   | YPDcl2 | YPDcl3 | EtOHcl1 | EtOHcl2 | Galcl1 | YPDnc1 | YPDnc2 | YPDnc3 | -      | EtOHnc1 | EtOHnc2 | Galnc1 | Galnc2 |
| 12 |        | YBR182C-A | YPDcl2 | YPDcl3 | EtOHcl1 | -       | Galcl1 | YPDnc1 | YPDnc2 | YPDnc3 | YPDnc4 | EtOHnc1 | EtOHnc2 | Galnc1 | Galnc2 |
| 12 | MET8   | YBR213W   | YPDcl2 | YPDcl3 | EtOHcl1 | EtOHcl2 | Galcl1 | YPDnc1 | -      | YPDnc3 | YPDnc4 | EtOHnc1 | EtOHnc2 | Galnc1 | Galnc2 |
| 12 |        | YPL205C   | YPDcl2 | YPDcl3 | EtOHcl1 | EtOHcl2 | Galcl1 | YPDnc1 | YPDnc2 | YPDnc3 | YPDnc4 | EtOHnc1 | -       | Galnc1 | Galnc2 |
| 12 | CAT8   | YMR280C   | YPDcl2 | -      | EtOHcl1 | EtOHcl2 | Galcl1 | YPDnc1 | YPDnc2 | YPDnc3 | YPDnc4 | EtOHnc1 | EtOHnc2 | Galnc1 | Galnc2 |
| 12 | MDH1   | YKL085W   | YPDcl2 | YPDcl3 | EtOHcl1 | EtOHcl2 | Galcl1 | YPDnc1 | YPDnc2 | YPDnc3 | YPDnc4 | EtOHnc1 | -       | Galnc1 | Galnc2 |
| 12 |        | YLR036C   | YPDcl2 | YPDcl3 | EtOHcl1 | EtOHcl2 | Galcl1 | YPDnc1 | YPDnc2 | YPDnc3 | YPDnc4 | -       | EtOHnc2 | Galnc1 | Galnc2 |

|          |           |        |        |         |         |        |        |        |        |        |         |         |        |        |
|----------|-----------|--------|--------|---------|---------|--------|--------|--------|--------|--------|---------|---------|--------|--------|
| 12 SRP1  | YNL189W   | YPDcl2 | YPDcl3 | EtOHcl1 | EtOHcl2 | Galcl1 | -      | YPDnc2 | YPDnc3 | YPDnc4 | EtOHnc1 | EtOHnc2 | Galnc1 | Galnc2 |
| 12 KIN2  | YLR096W   | YPDcl2 | -      | EtOHcl1 | EtOHcl2 | Galcl1 | YPDnc1 | YPDnc2 | YPDnc3 | YPDnc4 | EtOHnc1 | EtOHnc2 | Galnc1 | Galnc2 |
| 12 RPT3  | YDR394W   | YPDcl2 | YPDcl3 | -       | EtOHcl2 | Galcl1 | YPDnc1 | YPDnc2 | YPDnc3 | YPDnc4 | EtOHnc1 | EtOHnc2 | Galnc1 | Galnc2 |
| 12 PCL5  | YHR071W   | YPDcl2 | YPDcl3 | EtOHcl1 | EtOHcl2 | Galcl1 | YPDnc1 | YPDnc2 | YPDnc3 | YPDnc4 | EtOHnc1 | EtOHnc2 | Galnc1 | -      |
| 12 ROT1  | YMR200W   | YPDcl2 | YPDcl3 | EtOHcl1 | -       | Galcl1 | YPDnc1 | YPDnc2 | YPDnc3 | YPDnc4 | EtOHnc1 | EtOHnc2 | Galnc1 | Galnc2 |
| 12 RRT13 | YER066W   | YPDcl2 | YPDcl3 | EtOHcl1 | EtOHcl2 | Galcl1 | YPDnc1 | YPDnc2 | YPDnc3 | YPDnc4 | EtOHnc1 | -       | Galnc1 | Galnc2 |
| 12 EK11  | YDR147W   | YPDcl2 | YPDcl3 | EtOHcl1 | -       | Galcl1 | YPDnc1 | YPDnc2 | YPDnc3 | YPDnc4 | EtOHnc1 | EtOHnc2 | Galnc1 | Galnc2 |
| 12 RIF1  | YBR275C   | YPDcl2 | YPDcl3 | EtOHcl1 | EtOHcl2 | Galcl1 | YPDnc1 | YPDnc2 | YPDnc3 | YPDnc4 | EtOHnc1 | -       | Galnc1 | Galnc2 |
| 12 DCP2  | YNL118C   | YPDcl2 | YPDcl3 | EtOHcl1 | -       | Galcl1 | YPDnc1 | YPDnc2 | YPDnc3 | YPDnc4 | EtOHnc1 | EtOHnc2 | Galnc1 | Galnc2 |
| 12 LYS9  | YNR050C   | YPDcl2 | -      | EtOHcl1 | EtOHcl2 | Galcl1 | YPDnc1 | YPDnc2 | YPDnc3 | YPDnc4 | EtOHnc1 | EtOHnc2 | Galnc1 | Galnc2 |
| 12       | YKL023C-A | YPDcl2 | YPDcl3 | EtOHcl1 | EtOHcl2 | -      | YPDnc1 | YPDnc2 | YPDnc3 | YPDnc4 | EtOHnc1 | EtOHnc2 | Galnc1 | Galnc2 |
| 12 RAD26 | YJR035W   | YPDcl2 | YPDcl3 | EtOHcl1 | EtOHcl2 | -      | YPDnc1 | YPDnc2 | YPDnc3 | YPDnc4 | EtOHnc1 | EtOHnc2 | Galnc1 | Galnc2 |
| 12 RPS6B | YBR181C   | -      | YPDcl3 | EtOHcl1 | EtOHcl2 | Galcl1 | YPDnc1 | YPDnc2 | YPDnc3 | YPDnc4 | EtOHnc1 | EtOHnc2 | Galnc1 | Galnc2 |
| 12 PDR16 | YNL231C   | YPDcl2 | YPDcl3 | EtOHcl1 | EtOHcl2 | Galcl1 | YPDnc1 | YPDnc2 | YPDnc3 | -      | EtOHnc1 | EtOHnc2 | Galnc1 | Galnc2 |
| 12 GCD14 | YJL125C   | YPDcl2 | -      | EtOHcl1 | EtOHcl2 | Galcl1 | YPDnc1 | YPDnc2 | YPDnc3 | YPDnc4 | EtOHnc1 | EtOHnc2 | Galnc1 | Galnc2 |
| 12 SNU71 | YGR013W   | YPDcl2 | YPDcl3 | EtOHcl1 | EtOHcl2 | -      | YPDnc1 | YPDnc2 | YPDnc3 | YPDnc4 | EtOHnc1 | EtOHnc2 | Galnc1 | Galnc2 |
| 12 ARG80 | YMR042W   | YPDcl2 | YPDcl3 | EtOHcl1 | EtOHcl2 | Galcl1 | YPDnc1 | YPDnc2 | YPDnc3 | -      | EtOHnc1 | EtOHnc2 | Galnc1 | Galnc2 |
| 12 TES1  | YJR019C   | YPDcl2 | -      | EtOHcl1 | EtOHcl2 | Galcl1 | YPDnc1 | YPDnc2 | YPDnc3 | YPDnc4 | EtOHnc1 | EtOHnc2 | Galnc1 | Galnc2 |
| 12       | YOR293C-A | YPDcl2 | -      | EtOHcl1 | EtOHcl2 | Galcl1 | YPDnc1 | YPDnc2 | YPDnc3 | YPDnc4 | EtOHnc1 | EtOHnc2 | Galnc1 | Galnc2 |
| 12 CAB1  | YDR531W   | YPDcl2 | YPDcl3 | EtOHcl1 | EtOHcl2 | Galcl1 | YPDnc1 | YPDnc2 | YPDnc3 | YPDnc4 | EtOHnc1 | EtOHnc2 | Galnc1 | -      |
| 12       | YOL019W-  | YPDcl2 | YPDcl3 | EtOHcl1 | EtOHcl2 | Galcl1 | YPDnc1 | YPDnc2 | YPDnc3 | -      | EtOHnc1 | EtOHnc2 | Galnc1 | Galnc2 |
| 12       | YDL068W   | -      | YPDcl3 | EtOHcl1 | EtOHcl2 | Galcl1 | YPDnc1 | YPDnc2 | YPDnc3 | YPDnc4 | EtOHnc1 | EtOHnc2 | Galnc1 | Galnc2 |
| 12 MFB1  | YDR219C   | YPDcl2 | YPDcl3 | EtOHcl1 | EtOHcl2 | -      | YPDnc1 | YPDnc2 | YPDnc3 | YPDnc4 | EtOHnc1 | EtOHnc2 | Galnc1 | Galnc2 |
| 12       | YIL141W   | -      | YPDcl3 | EtOHcl1 | EtOHcl2 | Galcl1 | YPDnc1 | YPDnc2 | YPDnc3 | YPDnc4 | EtOHnc1 | EtOHnc2 | Galnc1 | Galnc2 |
| 12 BAT2  | YJR148W   | YPDcl2 | -      | EtOHcl1 | EtOHcl2 | Galcl1 | YPDnc1 | YPDnc2 | YPDnc3 | YPDnc4 | EtOHnc1 | EtOHnc2 | Galnc1 | Galnc2 |
| 12       | YIL102C-A | YPDcl2 | YPDcl3 | EtOHcl1 | -       | Galcl1 | YPDnc1 | YPDnc2 | YPDnc3 | YPDnc4 | EtOHnc1 | EtOHnc2 | Galnc1 | Galnc2 |
| 12 ATG5  | YPL149W   | YPDcl2 | -      | EtOHcl1 | EtOHcl2 | Galcl1 | YPDnc1 | YPDnc2 | YPDnc3 | YPDnc4 | EtOHnc1 | EtOHnc2 | Galnc1 | Galnc2 |
| 12       | YFL021C-A | YPDcl2 | YPDcl3 | -       | EtOHcl2 | Galcl1 | YPDnc1 | YPDnc2 | YPDnc3 | YPDnc4 | EtOHnc1 | EtOHnc2 | Galnc1 | Galnc2 |
| 12 GRS1  | YBR121C   | YPDcl2 | -      | EtOHcl1 | EtOHcl2 | Galcl1 | YPDnc1 | YPDnc2 | YPDnc3 | YPDnc4 | EtOHnc1 | EtOHnc2 | Galnc1 | Galnc2 |
| 12 GPB2  | YAL056W   | YPDcl2 | YPDcl3 | EtOHcl1 | EtOHcl2 | Galcl1 | YPDnc1 | YPDnc2 | -      | YPDnc4 | EtOHnc1 | EtOHnc2 | Galnc1 | Galnc2 |
| 12 TIR3  | YIL011W   | YPDcl2 | YPDcl3 | EtOHcl1 | -       | Galcl1 | YPDnc1 | YPDnc2 | YPDnc3 | YPDnc4 | EtOHnc1 | EtOHnc2 | Galnc1 | Galnc2 |
| 12 SOV1  | YMR066W   | -      | YPDcl3 | EtOHcl1 | EtOHcl2 | Galcl1 | YPDnc1 | YPDnc2 | YPDnc3 | YPDnc4 | EtOHnc1 | EtOHnc2 | Galnc1 | Galnc2 |
| 12 XDJ1  | YLR090W   | YPDcl2 | YPDcl3 | EtOHcl1 | EtOHcl2 | -      | YPDnc1 | YPDnc2 | YPDnc3 | YPDnc4 | EtOHnc1 | EtOHnc2 | Galnc1 | Galnc2 |
| 12 IES3  | YLR052W   | YPDcl2 | YPDcl3 | EtOHcl1 | -       | Galcl1 | YPDnc1 | YPDnc2 | YPDnc3 | YPDnc4 | EtOHnc1 | EtOHnc2 | Galnc1 | Galnc2 |

|    |        |         |        |        |         |         |        |        |        |        |        |         |         |        |        |
|----|--------|---------|--------|--------|---------|---------|--------|--------|--------|--------|--------|---------|---------|--------|--------|
| 12 | RAD57  | YDR004W | YPDcl2 | YPDcl3 | EtOHcl1 | EtOHcl2 | Galcl1 | YPDnc1 | YPDnc2 | -      | YPDnc4 | EtOHnc1 | EtOHnc2 | Galnc1 | Galnc2 |
| 12 | ERV15  | YBR210W | YPDcl2 | YPDcl3 | EtOHcl1 | EtOHcl2 | Galcl1 | YPDnc1 | YPDnc2 | YPDnc3 | YPDnc4 | EtOHnc1 | EtOHnc2 | Galnc1 | -      |
| 12 | FMP52  | YER004W | -      | YPDcl3 | EtOHcl1 | EtOHcl2 | Galcl1 | YPDnc1 | YPDnc2 | YPDnc3 | YPDnc4 | EtOHnc1 | EtOHnc2 | Galnc1 | Galnc2 |
| 12 | HOR7   | YMR251W | YPDcl2 | YPDcl3 | EtOHcl1 | -       | Galcl1 | YPDnc1 | YPDnc2 | YPDnc3 | YPDnc4 | EtOHnc1 | EtOHnc2 | Galnc1 | Galnc2 |
| 12 | RPS3   | YNL178W | YPDcl2 | YPDcl3 | EtOHcl1 | -       | Galcl1 | YPDnc1 | YPDnc2 | YPDnc3 | YPDnc4 | EtOHnc1 | EtOHnc2 | Galnc1 | Galnc2 |
| 12 | KRE2   | YDR483W | YPDcl2 | YPDcl3 | EtOHcl1 | EtOHcl2 | Galcl1 | -      | YPDnc2 | YPDnc3 | YPDnc4 | EtOHnc1 | EtOHnc2 | Galnc1 | Galnc2 |
| 12 | NPP1   | YCR026C | YPDcl2 | YPDcl3 | EtOHcl1 | -       | Galcl1 | YPDnc1 | YPDnc2 | YPDnc3 | YPDnc4 | EtOHnc1 | EtOHnc2 | Galnc1 | Galnc2 |
| 12 |        | YGL218W | YPDcl2 | YPDcl3 | EtOHcl1 | EtOHcl2 | Galcl1 | YPDnc1 | YPDnc2 | YPDnc3 | -      | EtOHnc1 | EtOHnc2 | Galnc1 | Galnc2 |
| 12 |        | YKR012C | YPDcl2 | YPDcl3 | EtOHcl1 | EtOHcl2 | -      | YPDnc1 | YPDnc2 | YPDnc3 | YPDnc4 | EtOHnc1 | EtOHnc2 | Galnc1 | Galnc2 |
| 12 | NHP6A  | YPR052C | -      | YPDcl3 | EtOHcl1 | EtOHcl2 | Galcl1 | YPDnc1 | YPDnc2 | YPDnc3 | YPDnc4 | EtOHnc1 | EtOHnc2 | Galnc1 | Galnc2 |
| 12 |        | YGR219W | YPDcl2 | -      | EtOHcl1 | EtOHcl2 | Galcl1 | YPDnc1 | YPDnc2 | YPDnc3 | YPDnc4 | EtOHnc1 | EtOHnc2 | Galnc1 | Galnc2 |
| 12 | SPC98  | YNL126W | YPDcl2 | YPDcl3 | EtOHcl1 | -       | Galcl1 | YPDnc1 | YPDnc2 | YPDnc3 | YPDnc4 | EtOHnc1 | EtOHnc2 | Galnc1 | Galnc2 |
| 12 | YAR1   | YPL239W | -      | YPDcl3 | EtOHcl1 | EtOHcl2 | Galcl1 | YPDnc1 | YPDnc2 | YPDnc3 | YPDnc4 | EtOHnc1 | EtOHnc2 | Galnc1 | Galnc2 |
| 12 | URA6   | YKL024C | YPDcl2 | YPDcl3 | EtOHcl1 | EtOHcl2 | -      | YPDnc1 | YPDnc2 | YPDnc3 | YPDnc4 | EtOHnc1 | EtOHnc2 | Galnc1 | Galnc2 |
| 12 | SPS22  | YCL048W | YPDcl2 | YPDcl3 | EtOHcl1 | -       | Galcl1 | YPDnc1 | YPDnc2 | YPDnc3 | YPDnc4 | EtOHnc1 | EtOHnc2 | Galnc1 | Galnc2 |
| 12 | COS9   | YKL219W | YPDcl2 | YPDcl3 | EtOHcl1 | -       | Galcl1 | YPDnc1 | YPDnc2 | YPDnc3 | YPDnc4 | EtOHnc1 | EtOHnc2 | Galnc1 | Galnc2 |
| 12 | CDC5   | YMR001C | YPDcl2 | YPDcl3 | -       | EtOHcl2 | Galcl1 | YPDnc1 | YPDnc2 | YPDnc3 | YPDnc4 | EtOHnc1 | EtOHnc2 | Galnc1 | Galnc2 |
| 12 | GDT1   | YBR187W | YPDcl2 | YPDcl3 | EtOHcl1 | EtOHcl2 | Galcl1 | -      | YPDnc2 | YPDnc3 | YPDnc4 | EtOHnc1 | EtOHnc2 | Galnc1 | Galnc2 |
| 12 |        | YCR097W | YPDcl2 | -      | EtOHcl1 | EtOHcl2 | Galcl1 | YPDnc1 | YPDnc2 | YPDnc3 | YPDnc4 | EtOHnc1 | EtOHnc2 | Galnc1 | Galnc2 |
| 12 | HMO1   | YDR174W | YPDcl2 | YPDcl3 | EtOHcl1 | -       | Galcl1 | YPDnc1 | YPDnc2 | YPDnc3 | YPDnc4 | EtOHnc1 | EtOHnc2 | Galnc1 | Galnc2 |
| 12 | CGI121 | YML036W | -      | YPDcl3 | EtOHcl1 | EtOHcl2 | Galcl1 | YPDnc1 | YPDnc2 | YPDnc3 | YPDnc4 | EtOHnc1 | EtOHnc2 | Galnc1 | Galnc2 |
| 12 |        | YLR177W | YPDcl2 | YPDcl3 | -       | EtOHcl2 | Galcl1 | YPDnc1 | YPDnc2 | YPDnc3 | YPDnc4 | EtOHnc1 | EtOHnc2 | Galnc1 | Galnc2 |
| 12 | PAP2   | YOL115W | YPDcl2 | YPDcl3 | EtOHcl1 | EtOHcl2 | Galcl1 | YPDnc1 | YPDnc2 | -      | YPDnc4 | EtOHnc1 | EtOHnc2 | Galnc1 | Galnc2 |
| 12 | TRE1   | YPL176C | YPDcl2 | YPDcl3 | EtOHcl1 | -       | Galcl1 | YPDnc1 | YPDnc2 | YPDnc3 | YPDnc4 | EtOHnc1 | EtOHnc2 | Galnc1 | Galnc2 |
| 12 | TRM82  | YDR165W | YPDcl2 | YPDcl3 | EtOHcl1 | EtOHcl2 | Galcl1 | YPDnc1 | YPDnc2 | YPDnc3 | YPDnc4 | -       | EtOHnc2 | Galnc1 | Galnc2 |
| 12 |        | YDR344C | YPDcl2 | YPDcl3 | EtOHcl1 | EtOHcl2 | Galcl1 | -      | YPDnc2 | YPDnc3 | YPDnc4 | EtOHnc1 | EtOHnc2 | Galnc1 | Galnc2 |
| 12 | RMD9   | YGL107C | -      | YPDcl3 | EtOHcl1 | EtOHcl2 | Galcl1 | YPDnc1 | YPDnc2 | YPDnc3 | YPDnc4 | EtOHnc1 | EtOHnc2 | Galnc1 | Galnc2 |
| 12 | ATP23  | YNR020C | -      | YPDcl3 | EtOHcl1 | EtOHcl2 | Galcl1 | YPDnc1 | YPDnc2 | YPDnc3 | YPDnc4 | EtOHnc1 | EtOHnc2 | Galnc1 | Galnc2 |
| 12 |        | YFR016C | YPDcl2 | YPDcl3 | EtOHcl1 | -       | Galcl1 | YPDnc1 | YPDnc2 | YPDnc3 | YPDnc4 | EtOHnc1 | EtOHnc2 | Galnc1 | Galnc2 |
| 12 | ADY2   | YCR010C | -      | YPDcl3 | EtOHcl1 | EtOHcl2 | Galcl1 | YPDnc1 | YPDnc2 | YPDnc3 | YPDnc4 | EtOHnc1 | EtOHnc2 | Galnc1 | Galnc2 |
| 12 | MSC6   | YOR354C | YPDcl2 | YPDcl3 | EtOHcl1 | EtOHcl2 | -      | YPDnc1 | YPDnc2 | YPDnc3 | YPDnc4 | EtOHnc1 | EtOHnc2 | Galnc1 | Galnc2 |
| 12 | ERG1   | YGR175C | YPDcl2 | YPDcl3 | EtOHcl1 | -       | Galcl1 | YPDnc1 | YPDnc2 | YPDnc3 | YPDnc4 | EtOHnc1 | EtOHnc2 | Galnc1 | Galnc2 |
| 12 | MCM5   | YLR274W | YPDcl2 | -      | EtOHcl1 | EtOHcl2 | Galcl1 | YPDnc1 | YPDnc2 | YPDnc3 | YPDnc4 | EtOHnc1 | EtOHnc2 | Galnc1 | Galnc2 |
| 12 | LAG1   | YHL003C | YPDcl2 | YPDcl3 | EtOHcl1 | EtOHcl2 | Galcl1 | YPDnc1 | -      | YPDnc3 | YPDnc4 | EtOHnc1 | EtOHnc2 | Galnc1 | Galnc2 |

|    |        |           |        |        |         |         |        |        |        |        |        |         |         |        |        |
|----|--------|-----------|--------|--------|---------|---------|--------|--------|--------|--------|--------|---------|---------|--------|--------|
| 12 | SDO1   | YLR022C   | YPDcl2 | YPDcl3 | EtOHcl1 | -       | Galcl1 | YPDnc1 | YPDnc2 | YPDnc3 | YPDnc4 | EtOHnc1 | EtOHnc2 | Galnc1 | Galnc2 |
| 12 | NGL1   | YOL042W   | YPDcl2 | -      | EtOHcl1 | EtOHcl2 | Galcl1 | YPDnc1 | YPDnc2 | YPDnc3 | YPDnc4 | EtOHnc1 | EtOHnc2 | Galnc1 | Galnc2 |
| 12 |        | YKL151C   | YPDcl2 | YPDcl3 | EtOHcl1 | EtOHcl2 | Galcl1 | YPDnc1 | YPDnc2 | YPDnc3 | YPDnc4 | EtOHnc1 | -       | Galnc1 | Galnc2 |
| 12 |        | YLR255C   | YPDcl2 | -      | EtOHcl1 | EtOHcl2 | Galcl1 | YPDnc1 | YPDnc2 | YPDnc3 | YPDnc4 | EtOHnc1 | EtOHnc2 | Galnc1 | Galnc2 |
| 12 | APS1   | YLR170C   | YPDcl2 | -      | EtOHcl1 | EtOHcl2 | Galcl1 | YPDnc1 | YPDnc2 | YPDnc3 | YPDnc4 | EtOHnc1 | EtOHnc2 | Galnc1 | Galnc2 |
| 12 |        | YBR287W   | YPDcl2 | YPDcl3 | EtOHcl1 | EtOHcl2 | Galcl1 | -      | YPDnc2 | YPDnc3 | YPDnc4 | EtOHnc1 | EtOHnc2 | Galnc1 | Galnc2 |
| 12 | SLM3   | YDL033C   | YPDcl2 | -      | EtOHcl1 | EtOHcl2 | Galcl1 | YPDnc1 | YPDnc2 | YPDnc3 | YPDnc4 | EtOHnc1 | EtOHnc2 | Galnc1 | Galnc2 |
| 12 |        | YML057C-A | -      | YPDcl3 | EtOHcl1 | EtOHcl2 | Galcl1 | YPDnc1 | YPDnc2 | YPDnc3 | YPDnc4 | EtOHnc1 | EtOHnc2 | Galnc1 | Galnc2 |
| 12 |        | YGR153W   | YPDcl2 | -      | EtOHcl1 | EtOHcl2 | Galcl1 | YPDnc1 | YPDnc2 | YPDnc3 | YPDnc4 | EtOHnc1 | EtOHnc2 | Galnc1 | Galnc2 |
| 12 |        | YPL062W   | YPDcl2 | YPDcl3 | EtOHcl1 | EtOHcl2 | Galcl1 | YPDnc1 | YPDnc2 | YPDnc3 | YPDnc4 | EtOHnc1 | -       | Galnc1 | Galnc2 |
| 12 | MNN4   | YKL201C   | YPDcl2 | YPDcl3 | EtOHcl1 | -       | Galcl1 | YPDnc1 | YPDnc2 | YPDnc3 | YPDnc4 | EtOHnc1 | EtOHnc2 | Galnc1 | Galnc2 |
| 12 |        | YNL198C   | YPDcl2 | YPDcl3 | EtOHcl1 | -       | Galcl1 | YPDnc1 | YPDnc2 | YPDnc3 | YPDnc4 | EtOHnc1 | EtOHnc2 | Galnc1 | Galnc2 |
| 12 | HFI1   | YPL254W   | YPDcl2 | YPDcl3 | EtOHcl1 | EtOHcl2 | -      | YPDnc1 | YPDnc2 | YPDnc3 | YPDnc4 | EtOHnc1 | EtOHnc2 | Galnc1 | Galnc2 |
| 12 | AIM37  | YNL100W   | YPDcl2 | YPDcl3 | EtOHcl1 | EtOHcl2 | Galcl1 | YPDnc1 | YPDnc2 | YPDnc3 | YPDnc4 | EtOHnc1 | -       | Galnc1 | Galnc2 |
| 12 |        | YOL114C   | -      | YPDcl3 | EtOHcl1 | EtOHcl2 | Galcl1 | YPDnc1 | YPDnc2 | YPDnc3 | YPDnc4 | EtOHnc1 | EtOHnc2 | Galnc1 | Galnc2 |
| 12 | SKN1   | YGR143W   | YPDcl2 | -      | EtOHcl1 | EtOHcl2 | Galcl1 | YPDnc1 | YPDnc2 | YPDnc3 | YPDnc4 | EtOHnc1 | EtOHnc2 | Galnc1 | Galnc2 |
| 12 | WTM2   | YOR229W   | -      | YPDcl3 | EtOHcl1 | EtOHcl2 | Galcl1 | YPDnc1 | YPDnc2 | YPDnc3 | YPDnc4 | EtOHnc1 | EtOHnc2 | Galnc1 | Galnc2 |
| 12 | PUF6   | YDR496C   | YPDcl2 | YPDcl3 | EtOHcl1 | -       | Galcl1 | YPDnc1 | YPDnc2 | YPDnc3 | YPDnc4 | EtOHnc1 | EtOHnc2 | Galnc1 | Galnc2 |
| 12 |        | YBL070C   | YPDcl2 | YPDcl3 | EtOHcl1 | EtOHcl2 | -      | YPDnc1 | YPDnc2 | YPDnc3 | YPDnc4 | EtOHnc1 | EtOHnc2 | Galnc1 | Galnc2 |
| 12 |        | YOR161W   | YPDcl2 | -      | EtOHcl1 | EtOHcl2 | Galcl1 | YPDnc1 | YPDnc2 | YPDnc3 | YPDnc4 | EtOHnc1 | EtOHnc2 | Galnc1 | Galnc2 |
| 12 | ALT2   | YDR111C   | YPDcl2 | -      | EtOHcl1 | EtOHcl2 | Galcl1 | YPDnc1 | YPDnc2 | YPDnc3 | YPDnc4 | EtOHnc1 | EtOHnc2 | Galnc1 | Galnc2 |
| 12 | MRPL16 | YBL038W   | YPDcl2 | YPDcl3 | -       | EtOHcl2 | Galcl1 | YPDnc1 | YPDnc2 | YPDnc3 | YPDnc4 | EtOHnc1 | EtOHnc2 | Galnc1 | Galnc2 |
| 12 |        | YLR422W   | YPDcl2 | -      | EtOHcl1 | EtOHcl2 | Galcl1 | YPDnc1 | YPDnc2 | YPDnc3 | YPDnc4 | EtOHnc1 | EtOHnc2 | Galnc1 | Galnc2 |
| 12 | PAU2   | YEL049W   | YPDcl2 | YPDcl3 | EtOHcl1 | EtOHcl2 | Galcl1 | YPDnc1 | YPDnc2 | YPDnc3 | YPDnc4 | EtOHnc1 | EtOHnc2 | Galnc1 | -      |
| 12 | REV3   | YPL167C   | YPDcl2 | YPDcl3 | EtOHcl1 | -       | Galcl1 | YPDnc1 | YPDnc2 | YPDnc3 | YPDnc4 | EtOHnc1 | EtOHnc2 | Galnc1 | Galnc2 |
| 12 | EDS1   | YBR033W   | YPDcl2 | YPDcl3 | EtOHcl1 | EtOHcl2 | Galcl1 | YPDnc1 | YPDnc2 | YPDnc3 | -      | EtOHnc1 | EtOHnc2 | Galnc1 | Galnc2 |
| 12 | UIP4   | YPL186C   | YPDcl2 | YPDcl3 | EtOHcl1 | -       | Galcl1 | YPDnc1 | YPDnc2 | YPDnc3 | YPDnc4 | EtOHnc1 | EtOHnc2 | Galnc1 | Galnc2 |
| 12 | PHO84  | YML123C   | -      | YPDcl3 | EtOHcl1 | EtOHcl2 | Galcl1 | YPDnc1 | YPDnc2 | YPDnc3 | YPDnc4 | EtOHnc1 | EtOHnc2 | Galnc1 | Galnc2 |
| 12 |        | YDL206W   | YPDcl2 | YPDcl3 | -       | EtOHcl2 | Galcl1 | YPDnc1 | YPDnc2 | YPDnc3 | YPDnc4 | EtOHnc1 | EtOHnc2 | Galnc1 | Galnc2 |
| 12 | UBP1   | YDL122W   | YPDcl2 | YPDcl3 | EtOHcl1 | EtOHcl2 | Galcl1 | YPDnc1 | YPDnc2 | YPDnc3 | YPDnc4 | EtOHnc1 | EtOHnc2 | Galnc1 | -      |
| 12 | RTC3   | YHR087W   | -      | YPDcl3 | EtOHcl1 | EtOHcl2 | Galcl1 | YPDnc1 | YPDnc2 | YPDnc3 | YPDnc4 | EtOHnc1 | EtOHnc2 | Galnc1 | Galnc2 |
| 12 | CTH1   | YDR151C   | YPDcl2 | YPDcl3 | EtOHcl1 | EtOHcl2 | Galcl1 | YPDnc1 | -      | YPDnc3 | YPDnc4 | EtOHnc1 | EtOHnc2 | Galnc1 | Galnc2 |
| 12 | TDA5   | YLR426W   | YPDcl2 | YPDcl3 | EtOHcl1 | -       | Galcl1 | YPDnc1 | YPDnc2 | YPDnc3 | YPDnc4 | EtOHnc1 | EtOHnc2 | Galnc1 | Galnc2 |
| 12 | NUP2   | YLR335W   | YPDcl2 | YPDcl3 | -       | EtOHcl2 | Galcl1 | YPDnc1 | YPDnc2 | YPDnc3 | YPDnc4 | EtOHnc1 | EtOHnc2 | Galnc1 | Galnc2 |

|           |           |        |        |         |         |        |        |        |        |        |         |         |        |        |
|-----------|-----------|--------|--------|---------|---------|--------|--------|--------|--------|--------|---------|---------|--------|--------|
| 12 HSP104 | YLL026W   | YPDcl2 | YPDcl3 | EtOHcl1 | EtOHcl2 | Galcl1 | YPDnc1 | -      | YPDnc3 | YPDnc4 | EtOHnc1 | EtOHnc2 | Galnc1 | Galnc2 |
| 12 RIT1   | YMR283C   | YPDcl2 | YPDcl3 | EtOHcl1 | EtOHcl2 | Galcl1 | -      | YPDnc2 | YPDnc3 | YPDnc4 | EtOHnc1 | EtOHnc2 | Galnc1 | Galnc2 |
| 12        | YBR137W   | YPDcl2 | YPDcl3 | EtOHcl1 | EtOHcl2 | Galcl1 | YPDnc1 | YPDnc2 | YPDnc3 | YPDnc4 | EtOHnc1 | -       | Galnc1 | Galnc2 |
| 12        | YML100W   | YPDcl2 | YPDcl3 | EtOHcl1 | EtOHcl2 | Galcl1 | YPDnc1 | YPDnc2 | YPDnc3 | YPDnc4 | EtOHnc1 | -       | Galnc1 | Galnc2 |
| 12 COX17  | YLL009C   | YPDcl2 | -      | EtOHcl1 | EtOHcl2 | Galcl1 | YPDnc1 | YPDnc2 | YPDnc3 | YPDnc4 | EtOHnc1 | EtOHnc2 | Galnc1 | Galnc2 |
| 12 TMN2   | YDR107C   | YPDcl2 | YPDcl3 | EtOHcl1 | -       | Galcl1 | YPDnc1 | YPDnc2 | YPDnc3 | YPDnc4 | EtOHnc1 | EtOHnc2 | Galnc1 | Galnc2 |
| 12 MRH4   | YGL064C   | YPDcl2 | -      | EtOHcl1 | EtOHcl2 | Galcl1 | YPDnc1 | YPDnc2 | YPDnc3 | YPDnc4 | EtOHnc1 | EtOHnc2 | Galnc1 | Galnc2 |
| 12 RKI1   | YOR095C   | YPDcl2 | YPDcl3 | EtOHcl1 | -       | Galcl1 | YPDnc1 | YPDnc2 | YPDnc3 | YPDnc4 | EtOHnc1 | EtOHnc2 | Galnc1 | Galnc2 |
| 12 HXT9   | YJL219W   | YPDcl2 | -      | EtOHcl1 | EtOHcl2 | Galcl1 | YPDnc1 | YPDnc2 | YPDnc3 | YPDnc4 | EtOHnc1 | EtOHnc2 | Galnc1 | Galnc2 |
| 12        | YJL193W   | YPDcl2 | YPDcl3 | EtOHcl1 | -       | Galcl1 | YPDnc1 | YPDnc2 | YPDnc3 | YPDnc4 | EtOHnc1 | EtOHnc2 | Galnc1 | Galnc2 |
| 12        | YAL063C-A | YPDcl2 | YPDcl3 | EtOHcl1 | EtOHcl2 | Galcl1 | YPDnc1 | YPDnc2 | YPDnc3 | YPDnc4 | -       | EtOHnc2 | Galnc1 | Galnc2 |
| 12 SAC7   | YDR389W   | YPDcl2 | YPDcl3 | EtOHcl1 | -       | Galcl1 | YPDnc1 | YPDnc2 | YPDnc3 | YPDnc4 | EtOHnc1 | EtOHnc2 | Galnc1 | Galnc2 |
| 12 SNF1   | YDR477W   | YPDcl2 | -      | EtOHcl1 | EtOHcl2 | Galcl1 | YPDnc1 | YPDnc2 | YPDnc3 | YPDnc4 | EtOHnc1 | EtOHnc2 | Galnc1 | Galnc2 |
| 12        | YER076W-  | YPDcl2 | YPDcl3 | EtOHcl1 | EtOHcl2 | Galcl1 | YPDnc1 | YPDnc2 | YPDnc3 | YPDnc4 | -       | EtOHnc2 | Galnc1 | Galnc2 |
| 12 DDC1   | YPL194W   | YPDcl2 | YPDcl3 | EtOHcl1 | EtOHcl2 | Galcl1 | YPDnc1 | YPDnc2 | YPDnc3 | YPDnc4 | -       | EtOHnc2 | Galnc1 | Galnc2 |
| 12        | YDL026W   | YPDcl2 | YPDcl3 | EtOHcl1 | EtOHcl2 | Galcl1 | YPDnc1 | YPDnc2 | YPDnc3 | YPDnc4 | EtOHnc1 | -       | Galnc1 | Galnc2 |
| 12        | YMR245W   | YPDcl2 | YPDcl3 | EtOHcl1 | EtOHcl2 | -      | YPDnc1 | YPDnc2 | YPDnc3 | YPDnc4 | EtOHnc1 | EtOHnc2 | Galnc1 | Galnc2 |
| 12        | YPL068C   | YPDcl2 | YPDcl3 | EtOHcl1 | -       | Galcl1 | YPDnc1 | YPDnc2 | YPDnc3 | YPDnc4 | EtOHnc1 | EtOHnc2 | Galnc1 | Galnc2 |
| 12 HUL4   | YJR036C   | YPDcl2 | -      | EtOHcl1 | EtOHcl2 | Galcl1 | YPDnc1 | YPDnc2 | YPDnc3 | YPDnc4 | EtOHnc1 | EtOHnc2 | Galnc1 | Galnc2 |
| 12 HPR1   | YDR138W   | YPDcl2 | YPDcl3 | EtOHcl1 | EtOHcl2 | Galcl1 | -      | YPDnc2 | YPDnc3 | YPDnc4 | EtOHnc1 | EtOHnc2 | Galnc1 | Galnc2 |
| 12        | YNL179C   | YPDcl2 | YPDcl3 | EtOHcl1 | EtOHcl2 | -      | YPDnc1 | YPDnc2 | YPDnc3 | YPDnc4 | EtOHnc1 | EtOHnc2 | Galnc1 | Galnc2 |
| 12 TEX1   | YNL253W   | -      | YPDcl3 | EtOHcl1 | EtOHcl2 | Galcl1 | YPDnc1 | YPDnc2 | YPDnc3 | YPDnc4 | EtOHnc1 | EtOHnc2 | Galnc1 | Galnc2 |
| 12 HIR3   | YJR140C   | YPDcl2 | YPDcl3 | EtOHcl1 | EtOHcl2 | Galcl1 | -      | YPDnc2 | YPDnc3 | YPDnc4 | EtOHnc1 | EtOHnc2 | Galnc1 | Galnc2 |
| 12 ROD1   | YOR018W   | YPDcl2 | YPDcl3 | EtOHcl1 | EtOHcl2 | Galcl1 | YPDnc1 | YPDnc2 | YPDnc3 | YPDnc4 | EtOHnc1 | -       | Galnc1 | Galnc2 |
| 12 CIN1   | YOR349W   | YPDcl2 | YPDcl3 | EtOHcl1 | -       | Galcl1 | YPDnc1 | YPDnc2 | YPDnc3 | YPDnc4 | EtOHnc1 | EtOHnc2 | Galnc1 | Galnc2 |
| 12 PEX7   | YDR142C   | -      | YPDcl3 | EtOHcl1 | EtOHcl2 | Galcl1 | YPDnc1 | YPDnc2 | YPDnc3 | YPDnc4 | EtOHnc1 | EtOHnc2 | Galnc1 | Galnc2 |
| 12 EHD3   | YDR036C   | -      | YPDcl3 | EtOHcl1 | EtOHcl2 | Galcl1 | YPDnc1 | YPDnc2 | YPDnc3 | YPDnc4 | EtOHnc1 | EtOHnc2 | Galnc1 | Galnc2 |
| 12 ECM27  | YJR106W   | -      | YPDcl3 | EtOHcl1 | EtOHcl2 | Galcl1 | YPDnc1 | YPDnc2 | YPDnc3 | YPDnc4 | EtOHnc1 | EtOHnc2 | Galnc1 | Galnc2 |
| 12 OAC1   | YKL120W   | YPDcl2 | YPDcl3 | EtOHcl1 | EtOHcl2 | -      | YPDnc1 | YPDnc2 | YPDnc3 | YPDnc4 | EtOHnc1 | EtOHnc2 | Galnc1 | Galnc2 |
| 12 SEC16  | YPL085W   | YPDcl2 | YPDcl3 | EtOHcl1 | EtOHcl2 | Galcl1 | -      | YPDnc2 | YPDnc3 | YPDnc4 | EtOHnc1 | EtOHnc2 | Galnc1 | Galnc2 |
| 12 MET3   | YJR010W   | YPDcl2 | YPDcl3 | -       | EtOHcl2 | Galcl1 | YPDnc1 | YPDnc2 | YPDnc3 | YPDnc4 | EtOHnc1 | EtOHnc2 | Galnc1 | Galnc2 |
| 12        | YPR053C   | YPDcl2 | YPDcl3 | EtOHcl1 | -       | Galcl1 | YPDnc1 | YPDnc2 | YPDnc3 | YPDnc4 | EtOHnc1 | EtOHnc2 | Galnc1 | Galnc2 |
| 12 DOM34  | YNL001W   | YPDcl2 | YPDcl3 | EtOHcl1 | -       | Galcl1 | YPDnc1 | YPDnc2 | YPDnc3 | YPDnc4 | EtOHnc1 | EtOHnc2 | Galnc1 | Galnc2 |
| 12 STE20  | YHL007C   | YPDcl2 | YPDcl3 | EtOHcl1 | -       | Galcl1 | YPDnc1 | YPDnc2 | YPDnc3 | YPDnc4 | EtOHnc1 | EtOHnc2 | Galnc1 | Galnc2 |



|    |       |           |        |        |         |         |        |        |        |        |        |         |         |        |        |
|----|-------|-----------|--------|--------|---------|---------|--------|--------|--------|--------|--------|---------|---------|--------|--------|
| 12 | TPS3  | YMR261C   | YPDcl2 | -      | EtOHcl1 | EtOHcl2 | Galcl1 | YPDnc1 | YPDnc2 | YPDnc3 | YPDnc4 | EtOHnc1 | EtOHnc2 | Galnc1 | Galnc2 |
| 12 | CHD1  | YER164W   | -      | YPDcl3 | EtOHcl1 | EtOHcl2 | Galcl1 | YPDnc1 | YPDnc2 | YPDnc3 | YPDnc4 | EtOHnc1 | EtOHnc2 | Galnc1 | Galnc2 |
| 12 | MCH5  | YOR306C   | YPDcl2 | YPDcl3 | EtOHcl1 | EtOHcl2 | Galcl1 | YPDnc1 | YPDnc2 | YPDnc3 | -      | EtOHnc1 | EtOHnc2 | Galnc1 | Galnc2 |
| 12 | CRR1  | YLR213C   | YPDcl2 | YPDcl3 | EtOHcl1 | -       | Galcl1 | YPDnc1 | YPDnc2 | YPDnc3 | YPDnc4 | EtOHnc1 | EtOHnc2 | Galnc1 | Galnc2 |
| 12 | SPC1  | YJR010C-A | YPDcl2 | YPDcl3 | EtOHcl1 | EtOHcl2 | Galcl1 | -      | YPDnc2 | YPDnc3 | YPDnc4 | EtOHnc1 | EtOHnc2 | Galnc1 | Galnc2 |
| 12 | ISA2  | YPR067W   | YPDcl2 | YPDcl3 | EtOHcl1 | EtOHcl2 | Galcl1 | -      | YPDnc2 | YPDnc3 | YPDnc4 | EtOHnc1 | EtOHnc2 | Galnc1 | Galnc2 |
| 12 | YRM1  | YOR172W   | YPDcl2 | YPDcl3 | EtOHcl1 | EtOHcl2 | Galcl1 | YPDnc1 | YPDnc2 | YPDnc3 | YPDnc4 | EtOHnc1 | -       | Galnc1 | Galnc2 |
| 12 |       | YOL160W   | YPDcl2 | -      | EtOHcl1 | EtOHcl2 | Galcl1 | YPDnc1 | YPDnc2 | YPDnc3 | YPDnc4 | EtOHnc1 | EtOHnc2 | Galnc1 | Galnc2 |
| 12 |       | YKR075C   | -      | YPDcl3 | EtOHcl1 | EtOHcl2 | Galcl1 | YPDnc1 | YPDnc2 | YPDnc3 | YPDnc4 | EtOHnc1 | EtOHnc2 | Galnc1 | Galnc2 |
| 12 | MFT1  | YML062C   | YPDcl2 | YPDcl3 | -       | EtOHcl2 | Galcl1 | YPDnc1 | YPDnc2 | YPDnc3 | YPDnc4 | EtOHnc1 | EtOHnc2 | Galnc1 | Galnc2 |
| 12 | GSH1  | YJL101C   | -      | YPDcl3 | EtOHcl1 | EtOHcl2 | Galcl1 | YPDnc1 | YPDnc2 | YPDnc3 | YPDnc4 | EtOHnc1 | EtOHnc2 | Galnc1 | Galnc2 |
| 12 | SWI5  | YDR146C   | YPDcl2 | YPDcl3 | EtOHcl1 | EtOHcl2 | Galcl1 | YPDnc1 | YPDnc2 | YPDnc3 | YPDnc4 | EtOHnc1 | -       | Galnc1 | Galnc2 |
| 12 |       | YJR037W   | YPDcl2 | -      | EtOHcl1 | EtOHcl2 | Galcl1 | YPDnc1 | YPDnc2 | YPDnc3 | YPDnc4 | EtOHnc1 | EtOHnc2 | Galnc1 | Galnc2 |
| 12 | CPD1  | YGR247W   | YPDcl2 | YPDcl3 | EtOHcl1 | EtOHcl2 | Galcl1 | YPDnc1 | YPDnc2 | YPDnc3 | -      | EtOHnc1 | EtOHnc2 | Galnc1 | Galnc2 |
| 12 | SBE2  | YDR351W   | YPDcl2 | YPDcl3 | EtOHcl1 | EtOHcl2 | Galcl1 | YPDnc1 | YPDnc2 | YPDnc3 | YPDnc4 | EtOHnc1 | -       | Galnc1 | Galnc2 |
| 12 |       | YHL008C   | YPDcl2 | YPDcl3 | EtOHcl1 | EtOHcl2 | -      | YPDnc1 | YPDnc2 | YPDnc3 | YPDnc4 | EtOHnc1 | EtOHnc2 | Galnc1 | Galnc2 |
| 12 | AVT3  | YKL146W   | YPDcl2 | -      | EtOHcl1 | EtOHcl2 | Galcl1 | YPDnc1 | YPDnc2 | YPDnc3 | YPDnc4 | EtOHnc1 | EtOHnc2 | Galnc1 | Galnc2 |
| 12 | NFI1  | YOR156C   | YPDcl2 | YPDcl3 | EtOHcl1 | -       | Galcl1 | YPDnc1 | YPDnc2 | YPDnc3 | YPDnc4 | EtOHnc1 | EtOHnc2 | Galnc1 | Galnc2 |
| 12 | CTF3  | YLR381W   | YPDcl2 | YPDcl3 | EtOHcl1 | -       | Galcl1 | YPDnc1 | YPDnc2 | YPDnc3 | YPDnc4 | EtOHnc1 | EtOHnc2 | Galnc1 | Galnc2 |
| 12 |       | YBL028C   | YPDcl2 | YPDcl3 | EtOHcl1 | EtOHcl2 | Galcl1 | -      | YPDnc2 | YPDnc3 | YPDnc4 | EtOHnc1 | EtOHnc2 | Galnc1 | Galnc2 |
| 12 | CDC73 | YLR418C   | YPDcl2 | YPDcl3 | -       | EtOHcl2 | Galcl1 | YPDnc1 | YPDnc2 | YPDnc3 | YPDnc4 | EtOHnc1 | EtOHnc2 | Galnc1 | Galnc2 |
| 12 | PFK2  | YMR205C   | YPDcl2 | YPDcl3 | EtOHcl1 | EtOHcl2 | -      | YPDnc1 | YPDnc2 | YPDnc3 | YPDnc4 | EtOHnc1 | EtOHnc2 | Galnc1 | Galnc2 |
| 12 |       | YJL118W   | -      | YPDcl3 | EtOHcl1 | EtOHcl2 | Galcl1 | YPDnc1 | YPDnc2 | YPDnc3 | YPDnc4 | EtOHnc1 | EtOHnc2 | Galnc1 | Galnc2 |
| 12 | GSP2  | YOR185C   | YPDcl2 | YPDcl3 | EtOHcl1 | -       | Galcl1 | YPDnc1 | YPDnc2 | YPDnc3 | YPDnc4 | EtOHnc1 | EtOHnc2 | Galnc1 | Galnc2 |
| 12 | RPE1  | YJL121C   | YPDcl2 | YPDcl3 | EtOHcl1 | -       | Galcl1 | YPDnc1 | YPDnc2 | YPDnc3 | YPDnc4 | EtOHnc1 | EtOHnc2 | Galnc1 | Galnc2 |
| 12 |       | YGL114W   | YPDcl2 | YPDcl3 | -       | EtOHcl2 | Galcl1 | YPDnc1 | YPDnc2 | YPDnc3 | YPDnc4 | EtOHnc1 | EtOHnc2 | Galnc1 | Galnc2 |
| 12 | EMC4  | YGL231C   | YPDcl2 | YPDcl3 | EtOHcl1 | EtOHcl2 | Galcl1 | YPDnc1 | YPDnc2 | YPDnc3 | YPDnc4 | -       | EtOHnc2 | Galnc1 | Galnc2 |
| 12 |       | YDL133W   | YPDcl2 | -      | EtOHcl1 | EtOHcl2 | Galcl1 | YPDnc1 | YPDnc2 | YPDnc3 | YPDnc4 | EtOHnc1 | EtOHnc2 | Galnc1 | Galnc2 |
| 12 | GPA1  | YHR005C   | YPDcl2 | YPDcl3 | EtOHcl1 | EtOHcl2 | Galcl1 | YPDnc1 | -      | YPDnc3 | YPDnc4 | EtOHnc1 | EtOHnc2 | Galnc1 | Galnc2 |
| 12 |       | YLR281C   | YPDcl2 | YPDcl3 | EtOHcl1 | -       | Galcl1 | YPDnc1 | YPDnc2 | YPDnc3 | YPDnc4 | EtOHnc1 | EtOHnc2 | Galnc1 | Galnc2 |
| 12 | PRO3  | YER023W   | YPDcl2 | YPDcl3 | EtOHcl1 | EtOHcl2 | Galcl1 | YPDnc1 | YPDnc2 | YPDnc3 | YPDnc4 | EtOHnc1 | EtOHnc2 | Galnc1 | -      |
| 12 |       | YGR039W   | YPDcl2 | YPDcl3 | EtOHcl1 | -       | Galcl1 | YPDnc1 | YPDnc2 | YPDnc3 | YPDnc4 | EtOHnc1 | EtOHnc2 | Galnc1 | Galnc2 |
| 12 |       | YOR161W   | YPDcl2 | -      | EtOHcl1 | EtOHcl2 | Galcl1 | YPDnc1 | YPDnc2 | YPDnc3 | YPDnc4 | EtOHnc1 | EtOHnc2 | Galnc1 | Galnc2 |
| 12 | SNL1  | YIL016W   | -      | YPDcl3 | EtOHcl1 | EtOHcl2 | Galcl1 | YPDnc1 | YPDnc2 | YPDnc3 | YPDnc4 | EtOHnc1 | EtOHnc2 | Galnc1 | Galnc2 |

|          |                       |        |        |         |         |        |        |        |        |        |         |         |        |        |
|----------|-----------------------|--------|--------|---------|---------|--------|--------|--------|--------|--------|---------|---------|--------|--------|
| 12 RSC9  | YML127W               | -      | YPDcl3 | EtOHcl1 | EtOHcl2 | Galcl1 | YPDnc1 | YPDnc2 | YPDnc3 | YPDnc4 | EtOHnc1 | EtOHnc2 | Galnc1 | Galnc2 |
| 12 POP1  | YNL221C               | -      | YPDcl3 | EtOHcl1 | EtOHcl2 | Galcl1 | YPDnc1 | YPDnc2 | YPDnc3 | YPDnc4 | EtOHnc1 | EtOHnc2 | Galnc1 | Galnc2 |
| 12       | YJR098C               | YPDcl2 | YPDcl3 | -       | EtOHcl2 | Galcl1 | YPDnc1 | YPDnc2 | YPDnc3 | YPDnc4 | EtOHnc1 | EtOHnc2 | Galnc1 | Galnc2 |
| 12 JSN1  | YJR091C               | -      | YPDcl3 | EtOHcl1 | EtOHcl2 | Galcl1 | YPDnc1 | YPDnc2 | YPDnc3 | YPDnc4 | EtOHnc1 | EtOHnc2 | Galnc1 | Galnc2 |
| 12       | YML007C- <del>A</del> | YPDcl2 | YPDcl3 | -       | EtOHcl2 | Galcl1 | YPDnc1 | YPDnc2 | YPDnc3 | YPDnc4 | EtOHnc1 | EtOHnc2 | Galnc1 | Galnc2 |
| 12       | YNL140C               | YPDcl2 | -      | EtOHcl1 | EtOHcl2 | Galcl1 | YPDnc1 | YPDnc2 | YPDnc3 | YPDnc4 | EtOHnc1 | EtOHnc2 | Galnc1 | Galnc2 |
| 12       | YMR160W               | -      | YPDcl3 | EtOHcl1 | EtOHcl2 | Galcl1 | YPDnc1 | YPDnc2 | YPDnc3 | YPDnc4 | EtOHnc1 | EtOHnc2 | Galnc1 | Galnc2 |
| 12 MDR1  | YGR100W               | YPDcl2 | YPDcl3 | EtOHcl1 | -       | Galcl1 | YPDnc1 | YPDnc2 | YPDnc3 | YPDnc4 | EtOHnc1 | EtOHnc2 | Galnc1 | Galnc2 |
| 12 MXR1  | YER042W               | YPDcl2 | YPDcl3 | EtOHcl1 | EtOHcl2 | Galcl1 | YPDnc1 | -      | YPDnc3 | YPDnc4 | EtOHnc1 | EtOHnc2 | Galnc1 | Galnc2 |
| 12 GDE1  | YPL110C               | YPDcl2 | YPDcl3 | EtOHcl1 | EtOHcl2 | Galcl1 | YPDnc1 | YPDnc2 | -      | YPDnc4 | EtOHnc1 | EtOHnc2 | Galnc1 | Galnc2 |
| 12 FPS1  | YLL043W               | YPDcl2 | YPDcl3 | EtOHcl1 | -       | Galcl1 | YPDnc1 | YPDnc2 | YPDnc3 | YPDnc4 | EtOHnc1 | EtOHnc2 | Galnc1 | Galnc2 |
| 12       | YPR195C               | YPDcl2 | YPDcl3 | EtOHcl1 | -       | Galcl1 | YPDnc1 | YPDnc2 | YPDnc3 | YPDnc4 | EtOHnc1 | EtOHnc2 | Galnc1 | Galnc2 |
| 12 BIT61 | YJL058C               | YPDcl2 | YPDcl3 | EtOHcl1 | -       | Galcl1 | YPDnc1 | YPDnc2 | YPDnc3 | YPDnc4 | EtOHnc1 | EtOHnc2 | Galnc1 | Galnc2 |
| 12 SWR1  | YDR334W               | YPDcl2 | YPDcl3 | EtOHcl1 | -       | Galcl1 | YPDnc1 | YPDnc2 | YPDnc3 | YPDnc4 | EtOHnc1 | EtOHnc2 | Galnc1 | Galnc2 |
| 12 DIS3  | YOL021C               | YPDcl2 | YPDcl3 | EtOHcl1 | EtOHcl2 | Galcl1 | YPDnc1 | YPDnc2 | YPDnc3 | -      | EtOHnc1 | EtOHnc2 | Galnc1 | Galnc2 |
| 12 SPO77 | YLR341W               | -      | YPDcl3 | EtOHcl1 | EtOHcl2 | Galcl1 | YPDnc1 | YPDnc2 | YPDnc3 | YPDnc4 | EtOHnc1 | EtOHnc2 | Galnc1 | Galnc2 |
| 12 DEM1  | YBR163W               | YPDcl2 | YPDcl3 | EtOHcl1 | EtOHcl2 | Galcl1 | YPDnc1 | YPDnc2 | YPDnc3 | -      | EtOHnc1 | EtOHnc2 | Galnc1 | Galnc2 |
| 12 FIG2  | YCR089W               | YPDcl2 | YPDcl3 | EtOHcl1 | EtOHcl2 | Galcl1 | YPDnc1 | YPDnc2 | YPDnc3 | YPDnc4 | EtOHnc1 | -       | Galnc1 | Galnc2 |
| 12       | YKL065W- <del>A</del> | YPDcl2 | YPDcl3 | EtOHcl1 | EtOHcl2 | Galcl1 | -      | YPDnc2 | YPDnc3 | YPDnc4 | EtOHnc1 | EtOHnc2 | Galnc1 | Galnc2 |
| 12 PPS1  | YBR276C               | YPDcl2 | YPDcl3 | EtOHcl1 | EtOHcl2 | -      | YPDnc1 | YPDnc2 | YPDnc3 | YPDnc4 | EtOHnc1 | EtOHnc2 | Galnc1 | Galnc2 |
| 12 PEX15 | YOL044W               | YPDcl2 | YPDcl3 | EtOHcl1 | EtOHcl2 | Galcl1 | YPDnc1 | -      | YPDnc3 | YPDnc4 | EtOHnc1 | EtOHnc2 | Galnc1 | Galnc2 |
| 12 CCR4  | YAL021C               | -      | YPDcl3 | EtOHcl1 | EtOHcl2 | Galcl1 | YPDnc1 | YPDnc2 | YPDnc3 | YPDnc4 | EtOHnc1 | EtOHnc2 | Galnc1 | Galnc2 |
| 12 SLY1  | YDR189W               | -      | YPDcl3 | EtOHcl1 | EtOHcl2 | Galcl1 | YPDnc1 | YPDnc2 | YPDnc3 | YPDnc4 | EtOHnc1 | EtOHnc2 | Galnc1 | Galnc2 |
| 12 DRN1  | YGR093W               | -      | YPDcl3 | EtOHcl1 | EtOHcl2 | Galcl1 | YPDnc1 | YPDnc2 | YPDnc3 | YPDnc4 | EtOHnc1 | EtOHnc2 | Galnc1 | Galnc2 |
| 12 TOM5  | YPR133W- <del>A</del> | YPDcl2 | YPDcl3 | EtOHcl1 | EtOHcl2 | Galcl1 | YPDnc1 | YPDnc2 | YPDnc3 | YPDnc4 | -       | EtOHnc2 | Galnc1 | Galnc2 |
| 12       | YDR008C               | YPDcl2 | YPDcl3 | EtOHcl1 | -       | Galcl1 | YPDnc1 | YPDnc2 | YPDnc3 | YPDnc4 | EtOHnc1 | EtOHnc2 | Galnc1 | Galnc2 |
| 12 IDS2  | YJL146W               | YPDcl2 | YPDcl3 | EtOHcl1 | EtOHcl2 | Galcl1 | YPDnc1 | -      | YPDnc3 | YPDnc4 | EtOHnc1 | EtOHnc2 | Galnc1 | Galnc2 |
| 12       | YOR012W               | YPDcl2 | YPDcl3 | -       | EtOHcl2 | Galcl1 | YPDnc1 | YPDnc2 | YPDnc3 | YPDnc4 | EtOHnc1 | EtOHnc2 | Galnc1 | Galnc2 |
| 12       | YMR244C- <del>A</del> | YPDcl2 | YPDcl3 | EtOHcl1 | EtOHcl2 | -      | YPDnc1 | YPDnc2 | YPDnc3 | YPDnc4 | EtOHnc1 | EtOHnc2 | Galnc1 | Galnc2 |
| 12 SIP18 | YMR175W               | YPDcl2 | YPDcl3 | EtOHcl1 | -       | Galcl1 | YPDnc1 | YPDnc2 | YPDnc3 | YPDnc4 | EtOHnc1 | EtOHnc2 | Galnc1 | Galnc2 |
| 12 NMD3  | YHR170W               | YPDcl2 | YPDcl3 | EtOHcl1 | -       | Galcl1 | YPDnc1 | YPDnc2 | YPDnc3 | YPDnc4 | EtOHnc1 | EtOHnc2 | Galnc1 | Galnc2 |
| 12 HBT1  | YDL223C               | YPDcl2 | YPDcl3 | EtOHcl1 | EtOHcl2 | Galcl1 | YPDnc1 | YPDnc2 | YPDnc3 | YPDnc4 | EtOHnc1 | -       | Galnc1 | Galnc2 |
| 12       | YDR338C               | YPDcl2 | -      | EtOHcl1 | EtOHcl2 | Galcl1 | YPDnc1 | YPDnc2 | YPDnc3 | YPDnc4 | EtOHnc1 | EtOHnc2 | Galnc1 | Galnc2 |
| 12 MLP1  | YKR095W               | YPDcl2 | YPDcl3 | -       | EtOHcl2 | Galcl1 | YPDnc1 | YPDnc2 | YPDnc3 | YPDnc4 | EtOHnc1 | EtOHnc2 | Galnc1 | Galnc2 |

|          |         |        |        |         |         |        |        |        |        |        |         |         |        |        |
|----------|---------|--------|--------|---------|---------|--------|--------|--------|--------|--------|---------|---------|--------|--------|
| 12 STM1  | YLR150W | YPDcl2 | YPDcl3 | EtOHcl1 | -       | Galcl1 | YPDnc1 | YPDnc2 | YPDnc3 | YPDnc4 | EtOHnc1 | EtOHnc2 | Galnc1 | Galnc2 |
| 12 REI1  | YBR267W | YPDcl2 | YPDcl3 | EtOHcl1 | -       | Galcl1 | YPDnc1 | YPDnc2 | YPDnc3 | YPDnc4 | EtOHnc1 | EtOHnc2 | Galnc1 | Galnc2 |
| 12 LCL1  | YPL056C | YPDcl2 | YPDcl3 | EtOHcl1 | EtOHcl2 | Galcl1 | YPDnc1 | -      | YPDnc3 | YPDnc4 | EtOHnc1 | EtOHnc2 | Galnc1 | Galnc2 |
| 12 TCO89 | YPL180W | YPDcl2 | YPDcl3 | EtOHcl1 | -       | Galcl1 | YPDnc1 | YPDnc2 | YPDnc3 | YPDnc4 | EtOHnc1 | EtOHnc2 | Galnc1 | Galnc2 |
| 12 MPD1  | YOR288C | YPDcl2 | YPDcl3 | -       | EtOHcl2 | Galcl1 | YPDnc1 | YPDnc2 | YPDnc3 | YPDnc4 | EtOHnc1 | EtOHnc2 | Galnc1 | Galnc2 |
| 12       | YPR148C | YPDcl2 | -      | EtOHcl1 | EtOHcl2 | Galcl1 | YPDnc1 | YPDnc2 | YPDnc3 | YPDnc4 | EtOHnc1 | EtOHnc2 | Galnc1 | Galnc2 |
| 12 MYO5  | YMR109W | YPDcl2 | YPDcl3 | EtOHcl1 | EtOHcl2 | Galcl1 | YPDnc1 | YPDnc2 | YPDnc3 | YPDnc4 | EtOHnc1 | -       | Galnc1 | Galnc2 |
| 12 GRE2  | YOL151W | YPDcl2 | YPDcl3 | EtOHcl1 | EtOHcl2 | Galcl1 | YPDnc1 | YPDnc2 | YPDnc3 | YPDnc4 | EtOHnc1 | -       | Galnc1 | Galnc2 |
| 12 FPR2  | YDR519W | -      | YPDcl3 | EtOHcl1 | EtOHcl2 | Galcl1 | YPDnc1 | YPDnc2 | YPDnc3 | YPDnc4 | EtOHnc1 | EtOHnc2 | Galnc1 | Galnc2 |
| 12 POL32 | YJR043C | YPDcl2 | YPDcl3 | EtOHcl1 | EtOHcl2 | Galcl1 | YPDnc1 | YPDnc2 | YPDnc3 | YPDnc4 | EtOHnc1 | -       | Galnc1 | Galnc2 |
| 12 TRS31 | YDR472W | YPDcl2 | YPDcl3 | EtOHcl1 | -       | Galcl1 | YPDnc1 | YPDnc2 | YPDnc3 | YPDnc4 | EtOHnc1 | EtOHnc2 | Galnc1 | Galnc2 |
| 12 GCR2  | YNL199C | YPDcl2 | YPDcl3 | EtOHcl1 | EtOHcl2 | Galcl1 | YPDnc1 | YPDnc2 | YPDnc3 | -      | EtOHnc1 | EtOHnc2 | Galnc1 | Galnc2 |
| 12       | YPL260W | YPDcl2 | YPDcl3 | EtOHcl1 | -       | Galcl1 | YPDnc1 | YPDnc2 | YPDnc3 | YPDnc4 | EtOHnc1 | EtOHnc2 | Galnc1 | Galnc2 |
| 12 STB4  | YMR019W | YPDcl2 | YPDcl3 | EtOHcl1 | -       | Galcl1 | YPDnc1 | YPDnc2 | YPDnc3 | YPDnc4 | EtOHnc1 | EtOHnc2 | Galnc1 | Galnc2 |
| 12 DTR1  | YBR180W | -      | YPDcl3 | EtOHcl1 | EtOHcl2 | Galcl1 | YPDnc1 | YPDnc2 | YPDnc3 | YPDnc4 | EtOHnc1 | EtOHnc2 | Galnc1 | Galnc2 |
| 12       | YER187W | YPDcl2 | YPDcl3 | EtOHcl1 | EtOHcl2 | -      | YPDnc1 | YPDnc2 | YPDnc3 | YPDnc4 | EtOHnc1 | EtOHnc2 | Galnc1 | Galnc2 |
| 12 OXA1  | YER154W | -      | YPDcl3 | EtOHcl1 | EtOHcl2 | Galcl1 | YPDnc1 | YPDnc2 | YPDnc3 | YPDnc4 | EtOHnc1 | EtOHnc2 | Galnc1 | Galnc2 |
| 12 DFR1  | YOR236W | -      | YPDcl3 | EtOHcl1 | EtOHcl2 | Galcl1 | YPDnc1 | YPDnc2 | YPDnc3 | YPDnc4 | EtOHnc1 | EtOHnc2 | Galnc1 | Galnc2 |
| 12 TOF1  | YNL273W | -      | YPDcl3 | EtOHcl1 | EtOHcl2 | Galcl1 | YPDnc1 | YPDnc2 | YPDnc3 | YPDnc4 | EtOHnc1 | EtOHnc2 | Galnc1 | Galnc2 |
| 12 PTC7  | YHR076W | YPDcl2 | YPDcl3 | EtOHcl1 | EtOHcl2 | Galcl1 | YPDnc1 | YPDnc2 | YPDnc3 | -      | EtOHnc1 | EtOHnc2 | Galnc1 | Galnc2 |
| 12 NRT1  | YOR071C | -      | YPDcl3 | EtOHcl1 | EtOHcl2 | Galcl1 | YPDnc1 | YPDnc2 | YPDnc3 | YPDnc4 | EtOHnc1 | EtOHnc2 | Galnc1 | Galnc2 |
| 12 GCN5  | YGR252W | YPDcl2 | YPDcl3 | EtOHcl1 | EtOHcl2 | Galcl1 | YPDnc1 | YPDnc2 | YPDnc3 | YPDnc4 | -       | EtOHnc2 | Galnc1 | Galnc2 |
| 12 LTP1  | YPR073C | -      | YPDcl3 | EtOHcl1 | EtOHcl2 | Galcl1 | YPDnc1 | YPDnc2 | YPDnc3 | YPDnc4 | EtOHnc1 | EtOHnc2 | Galnc1 | Galnc2 |
| 12 TAF5  | YBR198C | YPDcl2 | YPDcl3 | EtOHcl1 | -       | Galcl1 | YPDnc1 | YPDnc2 | YPDnc3 | YPDnc4 | EtOHnc1 | EtOHnc2 | Galnc1 | Galnc2 |
| 12       | YPL034W | YPDcl2 | YPDcl3 | EtOHcl1 | -       | Galcl1 | YPDnc1 | YPDnc2 | YPDnc3 | YPDnc4 | EtOHnc1 | EtOHnc2 | Galnc1 | Galnc2 |
| 12 UBA1  | YKL210W | -      | YPDcl3 | EtOHcl1 | EtOHcl2 | Galcl1 | YPDnc1 | YPDnc2 | YPDnc3 | YPDnc4 | EtOHnc1 | EtOHnc2 | Galnc1 | Galnc2 |
| 12 ZRG8  | YER033C | YPDcl2 | YPDcl3 | EtOHcl1 | EtOHcl2 | Galcl1 | YPDnc1 | YPDnc2 | YPDnc3 | YPDnc4 | EtOHnc1 | EtOHnc2 | -      | Galnc2 |
| 12 ELP2  | YGR200C | YPDcl2 | YPDcl3 | EtOHcl1 | -       | Galcl1 | YPDnc1 | YPDnc2 | YPDnc3 | YPDnc4 | EtOHnc1 | EtOHnc2 | Galnc1 | Galnc2 |
| 12 GUF1  | YLR289W | YPDcl2 | -      | EtOHcl1 | EtOHcl2 | Galcl1 | YPDnc1 | YPDnc2 | YPDnc3 | YPDnc4 | EtOHnc1 | EtOHnc2 | Galnc1 | Galnc2 |
| 12 SSY1  | YDR160W | -      | YPDcl3 | EtOHcl1 | EtOHcl2 | Galcl1 | YPDnc1 | YPDnc2 | YPDnc3 | YPDnc4 | EtOHnc1 | EtOHnc2 | Galnc1 | Galnc2 |
| 12 LOT6  | YLR011W | YPDcl2 | YPDcl3 | EtOHcl1 | EtOHcl2 | Galcl1 | -      | YPDnc2 | YPDnc3 | YPDnc4 | EtOHnc1 | EtOHnc2 | Galnc1 | Galnc2 |
| 12       | YMR279C | YPDcl2 | YPDcl3 | EtOHcl1 | EtOHcl2 | Galcl1 | YPDnc1 | YPDnc2 | YPDnc3 | YPDnc4 | EtOHnc1 | -       | Galnc1 | Galnc2 |
| 12 RPN11 | YFR004W | -      | YPDcl3 | EtOHcl1 | EtOHcl2 | Galcl1 | YPDnc1 | YPDnc2 | YPDnc3 | YPDnc4 | EtOHnc1 | EtOHnc2 | Galnc1 | Galnc2 |
| 12       | YBR064W | YPDcl2 | YPDcl3 | EtOHcl1 | EtOHcl2 | Galcl1 | YPDnc1 | YPDnc2 | YPDnc3 | YPDnc4 | EtOHnc1 | EtOHnc2 | Galnc1 | -      |

|    |            |            |        |         |         |         |        |        |        |        |         |         |         |        |        |
|----|------------|------------|--------|---------|---------|---------|--------|--------|--------|--------|---------|---------|---------|--------|--------|
| 12 | YKL147C    | YPDcl2     | YPDcl3 | -       | EtOHcl2 | Galcl1  | YPDnc1 | YPDnc2 | YPDnc3 | YPDnc4 | EtOHnc1 | EtOHnc2 | Galnc1  | Galnc2 |        |
| 12 | YKL069W    | YPDcl2     | YPDcl3 | EtOHcl1 | EtOHcl2 | Galcl1  | YPDnc1 | YPDnc2 | YPDnc3 | YPDnc4 | -       | EtOHnc2 | Galnc1  | Galnc2 |        |
| 12 | YSP2       | YDR326C    | YPDcl2 | YPDcl3  | EtOHcl1 | EtOHcl2 | Galcl1 | YPDnc1 | YPDnc2 | -      | YPDnc4  | EtOHnc1 | EtOHnc2 | Galnc1 | Galnc2 |
| 12 | YOR381W-   | YPDcl2     | YPDcl3 | EtOHcl1 | -       | Galcl1  | YPDnc1 | YPDnc2 | YPDnc3 | YPDnc4 | EtOHnc1 | EtOHnc2 | Galnc1  | Galnc2 |        |
| 12 | YPR197C    | YPDcl2     | YPDcl3 | EtOHcl1 | -       | Galcl1  | YPDnc1 | YPDnc2 | YPDnc3 | YPDnc4 | EtOHnc1 | EtOHnc2 | Galnc1  | Galnc2 |        |
| 12 | RPL1A      | YPL220W    | YPDcl2 | -       | EtOHcl1 | EtOHcl2 | Galcl1 | YPDnc1 | YPDnc2 | YPDnc3 | YPDnc4  | EtOHnc1 | EtOHnc2 | Galnc1 | Galnc2 |
| 12 | TFB3       | YDR460W    | YPDcl2 | YPDcl3  | EtOHcl1 | EtOHcl2 | Galcl1 | -      | YPDnc2 | YPDnc3 | YPDnc4  | EtOHnc1 | EtOHnc2 | Galnc1 | Galnc2 |
| 12 | YGL007C-A- | -          | YPDcl3 | EtOHcl1 | EtOHcl2 | Galcl1  | YPDnc1 | YPDnc2 | YPDnc3 | YPDnc4 | EtOHnc1 | EtOHnc2 | Galnc1  | Galnc2 |        |
| 12 | YMR173W-   | YPDcl2     | YPDcl3 | EtOHcl1 | EtOHcl2 | Galcl1  | YPDnc1 | YPDnc2 | YPDnc3 | YPDnc4 | EtOHnc1 | -       | Galnc1  | Galnc2 |        |
| 12 | YTP1       | YNL237W    | YPDcl2 | YPDcl3  | EtOHcl1 | EtOHcl2 | Galcl1 | -      | YPDnc2 | YPDnc3 | YPDnc4  | EtOHnc1 | EtOHnc2 | Galnc1 | Galnc2 |
| 12 | DOA1       | YKL213C    | YPDcl2 | YPDcl3  | EtOHcl1 | -       | Galcl1 | YPDnc1 | YPDnc2 | YPDnc3 | YPDnc4  | EtOHnc1 | EtOHnc2 | Galnc1 | Galnc2 |
| 12 | NNF1       | YJR112W    | YPDcl2 | YPDcl3  | EtOHcl1 | EtOHcl2 | Galcl1 | YPDnc1 | YPDnc2 | YPDnc3 | -       | EtOHnc1 | EtOHnc2 | Galnc1 | Galnc2 |
| 12 | SNA4       | YDL123W    | YPDcl2 | YPDcl3  | EtOHcl1 | EtOHcl2 | Galcl1 | YPDnc1 | YPDnc2 | YPDnc3 | -       | EtOHnc1 | EtOHnc2 | Galnc1 | Galnc2 |
| 12 | PBP4       | YDL053C    | -      | YPDcl3  | EtOHcl1 | EtOHcl2 | Galcl1 | YPDnc1 | YPDnc2 | YPDnc3 | YPDnc4  | EtOHnc1 | EtOHnc2 | Galnc1 | Galnc2 |
| 12 | MPA43      | YNL249C    | YPDcl2 | -       | EtOHcl1 | EtOHcl2 | Galcl1 | YPDnc1 | YPDnc2 | YPDnc3 | YPDnc4  | EtOHnc1 | EtOHnc2 | Galnc1 | Galnc2 |
| 12 | KEI1       | YDR367W    | YPDcl2 | YPDcl3  | EtOHcl1 | -       | Galcl1 | YPDnc1 | YPDnc2 | YPDnc3 | YPDnc4  | EtOHnc1 | EtOHnc2 | Galnc1 | Galnc2 |
| 12 | SDH3       | YKL141W    | YPDcl2 | YPDcl3  | EtOHcl1 | EtOHcl2 | Galcl1 | YPDnc1 | YPDnc2 | YPDnc3 | YPDnc4  | EtOHnc1 | -       | Galnc1 | Galnc2 |
| 12 | RNH201     | YNL072W    | YPDcl2 | YPDcl3  | EtOHcl1 | -       | Galcl1 | YPDnc1 | YPDnc2 | YPDnc3 | YPDnc4  | EtOHnc1 | EtOHnc2 | Galnc1 | Galnc2 |
| 12 | IRS4       | YKR019C    | YPDcl2 | YPDcl3  | EtOHcl1 | -       | Galcl1 | YPDnc1 | YPDnc2 | YPDnc3 | YPDnc4  | EtOHnc1 | EtOHnc2 | Galnc1 | Galnc2 |
| 12 |            | YOR062C    | YPDcl2 | YPDcl3  | EtOHcl1 | -       | Galcl1 | YPDnc1 | YPDnc2 | YPDnc3 | YPDnc4  | EtOHnc1 | EtOHnc2 | Galnc1 | Galnc2 |
| 12 | PBA1       | YLR199C    | YPDcl2 | -       | EtOHcl1 | EtOHcl2 | Galcl1 | YPDnc1 | YPDnc2 | YPDnc3 | YPDnc4  | EtOHnc1 | EtOHnc2 | Galnc1 | Galnc2 |
| 12 | TMA22      | YJR014W    | -      | YPDcl3  | EtOHcl1 | EtOHcl2 | Galcl1 | YPDnc1 | YPDnc2 | YPDnc3 | YPDnc4  | EtOHnc1 | EtOHnc2 | Galnc1 | Galnc2 |
| 12 |            | YDL050C    | YPDcl2 | YPDcl3  | EtOHcl1 | EtOHcl2 | -      | YPDnc1 | YPDnc2 | YPDnc3 | YPDnc4  | EtOHnc1 | EtOHnc2 | Galnc1 | Galnc2 |
| 12 |            | YDL086C-A- | -      | YPDcl3  | EtOHcl1 | EtOHcl2 | Galcl1 | YPDnc1 | YPDnc2 | YPDnc3 | YPDnc4  | EtOHnc1 | EtOHnc2 | Galnc1 | Galnc2 |
| 12 |            | YDR187C    | -      | YPDcl3  | EtOHcl1 | EtOHcl2 | Galcl1 | YPDnc1 | YPDnc2 | YPDnc3 | YPDnc4  | EtOHnc1 | EtOHnc2 | Galnc1 | Galnc2 |
| 12 |            | YDR336W    | YPDcl2 | -       | EtOHcl1 | EtOHcl2 | Galcl1 | YPDnc1 | YPDnc2 | YPDnc3 | YPDnc4  | EtOHnc1 | EtOHnc2 | Galnc1 | Galnc2 |
| 12 | SDS23      | YGL056C    | YPDcl2 | YPDcl3  | EtOHcl1 | EtOHcl2 | Galcl1 | YPDnc1 | YPDnc2 | YPDnc3 | YPDnc4  | EtOHnc1 | EtOHnc2 | -      | Galnc2 |
| 12 |            | YBR071W    | YPDcl2 | YPDcl3  | EtOHcl1 | EtOHcl2 | Galcl1 | YPDnc1 | YPDnc2 | YPDnc3 | YPDnc4  | EtOHnc1 | -       | Galnc1 | Galnc2 |
| 12 | ECM33      | YBR078W    | -      | YPDcl3  | EtOHcl1 | EtOHcl2 | Galcl1 | YPDnc1 | YPDnc2 | YPDnc3 | YPDnc4  | EtOHnc1 | EtOHnc2 | Galnc1 | Galnc2 |
| 12 | BCY1       | YIL033C    | YPDcl2 | YPDcl3  | EtOHcl1 | -       | Galcl1 | YPDnc1 | YPDnc2 | YPDnc3 | YPDnc4  | EtOHnc1 | EtOHnc2 | Galnc1 | Galnc2 |
| 12 | IST3       | YIR005W    | -      | YPDcl3  | EtOHcl1 | EtOHcl2 | Galcl1 | YPDnc1 | YPDnc2 | YPDnc3 | YPDnc4  | EtOHnc1 | EtOHnc2 | Galnc1 | Galnc2 |
| 12 | HEM3       | YDL205C    | YPDcl2 | YPDcl3  | -       | EtOHcl2 | Galcl1 | YPDnc1 | YPDnc2 | YPDnc3 | YPDnc4  | EtOHnc1 | EtOHnc2 | Galnc1 | Galnc2 |
| 12 | TKL2       | YBR117C    | YPDcl2 | YPDcl3  | EtOHcl1 | -       | Galcl1 | YPDnc1 | YPDnc2 | YPDnc3 | YPDnc4  | EtOHnc1 | EtOHnc2 | Galnc1 | Galnc2 |
| 12 |            | YFR006W    | YPDcl2 | YPDcl3  | EtOHcl1 | -       | Galcl1 | YPDnc1 | YPDnc2 | YPDnc3 | YPDnc4  | EtOHnc1 | EtOHnc2 | Galnc1 | Galnc2 |

|    |        |           |        |        |         |         |        |        |        |        |        |         |         |        |        |
|----|--------|-----------|--------|--------|---------|---------|--------|--------|--------|--------|--------|---------|---------|--------|--------|
| 12 | LOS1   | YKL205W   | -      | YPDcl3 | EtOHcl1 | EtOHcl2 | Galcl1 | YPDnc1 | YPDnc2 | YPDnc3 | YPDnc4 | EtOHnc1 | EtOHnc2 | Galnc1 | Galnc2 |
| 12 | CMK2   | YOL016C   | -      | YPDcl3 | EtOHcl1 | EtOHcl2 | Galcl1 | YPDnc1 | YPDnc2 | YPDnc3 | YPDnc4 | EtOHnc1 | EtOHnc2 | Galnc1 | Galnc2 |
| 12 | CUP9   | YPL177C   | -      | YPDcl3 | EtOHcl1 | EtOHcl2 | Galcl1 | YPDnc1 | YPDnc2 | YPDnc3 | YPDnc4 | EtOHnc1 | EtOHnc2 | Galnc1 | Galnc2 |
| 12 |        | YJL136W-A | YPDcl2 | YPDcl3 | EtOHcl1 | EtOHcl2 | Galcl1 | YPDnc1 | YPDnc2 | YPDnc3 | YPDnc4 | -       | EtOHnc2 | Galnc1 | Galnc2 |
| 12 |        | YNR066C   | -      | YPDcl3 | EtOHcl1 | EtOHcl2 | Galcl1 | YPDnc1 | YPDnc2 | YPDnc3 | YPDnc4 | EtOHnc1 | EtOHnc2 | Galnc1 | Galnc2 |
| 12 |        | YDR455C   | YPDcl2 | -      | EtOHcl1 | EtOHcl2 | Galcl1 | YPDnc1 | YPDnc2 | YPDnc3 | YPDnc4 | EtOHnc1 | EtOHnc2 | Galnc1 | Galnc2 |
| 12 | UAF30  | YOR295W   | YPDcl2 | YPDcl3 | EtOHcl1 | EtOHcl2 | Galcl1 | YPDnc1 | -      | YPDnc3 | YPDnc4 | EtOHnc1 | EtOHnc2 | Galnc1 | Galnc2 |
| 12 |        | YGR066C   | YPDcl2 | YPDcl3 | EtOHcl1 | -       | Galcl1 | YPDnc1 | YPDnc2 | YPDnc3 | YPDnc4 | EtOHnc1 | EtOHnc2 | Galnc1 | Galnc2 |
| 12 | OPT1   | YJL212C   | YPDcl2 | YPDcl3 | EtOHcl1 | EtOHcl2 | Galcl1 | YPDnc1 | YPDnc2 | -      | YPDnc4 | EtOHnc1 | EtOHnc2 | Galnc1 | Galnc2 |
| 12 |        | YER172C-A | -      | YPDcl3 | EtOHcl1 | EtOHcl2 | Galcl1 | YPDnc1 | YPDnc2 | YPDnc3 | YPDnc4 | EtOHnc1 | EtOHnc2 | Galnc1 | Galnc2 |
| 12 | ARA2   | YMR041C   | YPDcl2 | -      | EtOHcl1 | EtOHcl2 | Galcl1 | YPDnc1 | YPDnc2 | YPDnc3 | YPDnc4 | EtOHnc1 | EtOHnc2 | Galnc1 | Galnc2 |
| 12 | THS1   | YIL078W   | YPDcl2 | YPDcl3 | EtOHcl1 | EtOHcl2 | Galcl1 | YPDnc1 | YPDnc2 | YPDnc3 | YPDnc4 | EtOHnc1 | EtOHnc2 | Galnc1 | -      |
| 12 | PRP11  | YDL043C   | YPDcl2 | YPDcl3 | EtOHcl1 | EtOHcl2 | Galcl1 | YPDnc1 | YPDnc2 | YPDnc3 | YPDnc4 | -       | EtOHnc2 | Galnc1 | Galnc2 |
| 12 | PDR10  | YOR328W   | YPDcl2 | YPDcl3 | EtOHcl1 | EtOHcl2 | Galcl1 | YPDnc1 | YPDnc2 | YPDnc3 | YPDnc4 | EtOHnc1 | -       | Galnc1 | Galnc2 |
| 12 |        | YLR041W   | YPDcl2 | YPDcl3 | EtOHcl1 | EtOHcl2 | Galcl1 | YPDnc1 | YPDnc2 | YPDnc3 | YPDnc4 | EtOHnc1 | -       | Galnc1 | Galnc2 |
| 12 | DIF1   | YLR437C   | YPDcl2 | YPDcl3 | EtOHcl1 | EtOHcl2 | Galcl1 | YPDnc1 | YPDnc2 | YPDnc3 | YPDnc4 | EtOHnc1 | EtOHnc2 | -      | Galnc2 |
| 12 | AUS1   | YOR011W   | YPDcl2 | YPDcl3 | EtOHcl1 | EtOHcl2 | Galcl1 | YPDnc1 | YPDnc2 | YPDnc3 | YPDnc4 | -       | EtOHnc2 | Galnc1 | Galnc2 |
| 12 | DPH1   | YIL103W   | YPDcl2 | YPDcl3 | EtOHcl1 | -       | Galcl1 | YPDnc1 | YPDnc2 | YPDnc3 | YPDnc4 | EtOHnc1 | EtOHnc2 | Galnc1 | Galnc2 |
| 12 | LDB7   | YBL006C   | -      | YPDcl3 | EtOHcl1 | EtOHcl2 | Galcl1 | YPDnc1 | YPDnc2 | YPDnc3 | YPDnc4 | EtOHnc1 | EtOHnc2 | Galnc1 | Galnc2 |
| 12 | ACF2   | YLR144C   | YPDcl2 | YPDcl3 | -       | EtOHcl2 | Galcl1 | YPDnc1 | YPDnc2 | YPDnc3 | YPDnc4 | EtOHnc1 | EtOHnc2 | Galnc1 | Galnc2 |
| 12 | PIN3   | YPR154W   | YPDcl2 | YPDcl3 | EtOHcl1 | -       | Galcl1 | YPDnc1 | YPDnc2 | YPDnc3 | YPDnc4 | EtOHnc1 | EtOHnc2 | Galnc1 | Galnc2 |
| 12 | RSC3   | YDR303C   | YPDcl2 | YPDcl3 | EtOHcl1 | -       | Galcl1 | YPDnc1 | YPDnc2 | YPDnc3 | YPDnc4 | EtOHnc1 | EtOHnc2 | Galnc1 | Galnc2 |
| 12 |        | YDR154C   | YPDcl2 | YPDcl3 | EtOHcl1 | EtOHcl2 | Galcl1 | YPDnc1 | YPDnc2 | YPDnc3 | -      | EtOHnc1 | EtOHnc2 | Galnc1 | Galnc2 |
| 12 | SCC4   | YER147C   | YPDcl2 | YPDcl3 | EtOHcl1 | -       | Galcl1 | YPDnc1 | YPDnc2 | YPDnc3 | YPDnc4 | EtOHnc1 | EtOHnc2 | Galnc1 | Galnc2 |
| 12 | ICE2   | YIL090W   | YPDcl2 | YPDcl3 | EtOHcl1 | EtOHcl2 | Galcl1 | -      | YPDnc2 | YPDnc3 | YPDnc4 | EtOHnc1 | EtOHnc2 | Galnc1 | Galnc2 |
| 12 | CPA2   | YJR109C   | YPDcl2 | YPDcl3 | EtOHcl1 | EtOHcl2 | Galcl1 | YPDnc1 | YPDnc2 | YPDnc3 | -      | EtOHnc1 | EtOHnc2 | Galnc1 | Galnc2 |
| 12 | NUP100 | YKL068W   | YPDcl2 | YPDcl3 | EtOHcl1 | -       | Galcl1 | YPDnc1 | YPDnc2 | YPDnc3 | YPDnc4 | EtOHnc1 | EtOHnc2 | Galnc1 | Galnc2 |
| 12 | ADE8   | YDR408C   | -      | YPDcl3 | EtOHcl1 | EtOHcl2 | Galcl1 | YPDnc1 | YPDnc2 | YPDnc3 | YPDnc4 | EtOHnc1 | EtOHnc2 | Galnc1 | Galnc2 |
| 12 | PCC1   | YKR095W-  | YPDcl2 | YPDcl3 | EtOHcl1 | EtOHcl2 | Galcl1 | YPDnc1 | YPDnc2 | YPDnc3 | YPDnc4 | EtOHnc1 | -       | Galnc1 | Galnc2 |
| 12 | DOT1   | YDR440W   | YPDcl2 | YPDcl3 | EtOHcl1 | -       | Galcl1 | YPDnc1 | YPDnc2 | YPDnc3 | YPDnc4 | EtOHnc1 | EtOHnc2 | Galnc1 | Galnc2 |
| 12 | RPC31  | YNL151C   | YPDcl2 | YPDcl3 | EtOHcl1 | -       | Galcl1 | YPDnc1 | YPDnc2 | YPDnc3 | YPDnc4 | EtOHnc1 | EtOHnc2 | Galnc1 | Galnc2 |
| 12 | NCS6   | YGL211W   | YPDcl2 | YPDcl3 | -       | EtOHcl2 | Galcl1 | YPDnc1 | YPDnc2 | YPDnc3 | YPDnc4 | EtOHnc1 | EtOHnc2 | Galnc1 | Galnc2 |
| 12 |        | YMR304C-  | -      | YPDcl3 | EtOHcl1 | EtOHcl2 | Galcl1 | YPDnc1 | YPDnc2 | YPDnc3 | YPDnc4 | EtOHnc1 | EtOHnc2 | Galnc1 | Galnc2 |
| 12 | GLN1   | YPR035W   | YPDcl2 | YPDcl3 | EtOHcl1 | EtOHcl2 | Galcl1 | YPDnc1 | -      | YPDnc3 | YPDnc4 | EtOHnc1 | EtOHnc2 | Galnc1 | Galnc2 |

|           |         |        |        |         |         |        |        |        |        |        |         |         |        |        |
|-----------|---------|--------|--------|---------|---------|--------|--------|--------|--------|--------|---------|---------|--------|--------|
| 12 DHR2   | YKL078W | -      | YPDcl3 | EtOHcl1 | EtOHcl2 | Galcl1 | YPDnc1 | YPDnc2 | YPDnc3 | YPDnc4 | EtOHnc1 | EtOHnc2 | Galnc1 | Galnc2 |
| 12 CPR1   | YDR155C | YPDcl2 | YPDcl3 | EtOHcl1 | EtOHcl2 | Galcl1 | YPDnc1 | YPDnc2 | YPDnc3 | -      | EtOHnc1 | EtOHnc2 | Galnc1 | Galnc2 |
| 12 YOS1   | YER074W | YPDcl2 | YPDcl3 | EtOHcl1 | EtOHcl2 | Galcl1 | YPDnc1 | YPDnc2 | YPDnc3 | YPDnc4 | EtOHnc1 | -       | Galnc1 | Galnc2 |
| 12        | YGR201C | -      | YPDcl3 | EtOHcl1 | EtOHcl2 | Galcl1 | YPDnc1 | YPDnc2 | YPDnc3 | YPDnc4 | EtOHnc1 | EtOHnc2 | Galnc1 | Galnc2 |
| 12        | YIL163C | YPDcl2 | YPDcl3 | EtOHcl1 | -       | Galcl1 | YPDnc1 | YPDnc2 | YPDnc3 | YPDnc4 | EtOHnc1 | EtOHnc2 | Galnc1 | Galnc2 |
| 12 HKR1   | YDR420W | YPDcl2 | YPDcl3 | -       | EtOHcl2 | Galcl1 | YPDnc1 | YPDnc2 | YPDnc3 | YPDnc4 | EtOHnc1 | EtOHnc2 | Galnc1 | Galnc2 |
| 12        | YDR186C | YPDcl2 | YPDcl3 | EtOHcl1 | EtOHcl2 | Galcl1 | YPDnc1 | YPDnc2 | YPDnc3 | -      | EtOHnc1 | EtOHnc2 | Galnc1 | Galnc2 |
| 12 GPI15  | YNL038W | YPDcl2 | YPDcl3 | EtOHcl1 | -       | Galcl1 | YPDnc1 | YPDnc2 | YPDnc3 | YPDnc4 | EtOHnc1 | EtOHnc2 | Galnc1 | Galnc2 |
| 12 YIM1   | YMR152W | YPDcl2 | YPDcl3 | EtOHcl1 | EtOHcl2 | Galcl1 | YPDnc1 | YPDnc2 | YPDnc3 | -      | EtOHnc1 | EtOHnc2 | Galnc1 | Galnc2 |
| 12 IDI1   | YPL117C | YPDcl2 | YPDcl3 | -       | EtOHcl2 | Galcl1 | YPDnc1 | YPDnc2 | YPDnc3 | YPDnc4 | EtOHnc1 | EtOHnc2 | Galnc1 | Galnc2 |
| 12 DGK1   | YOR311C | YPDcl2 | -      | EtOHcl1 | EtOHcl2 | Galcl1 | YPDnc1 | YPDnc2 | YPDnc3 | YPDnc4 | EtOHnc1 | EtOHnc2 | Galnc1 | Galnc2 |
| 12 YAP6   | YDR259C | -      | YPDcl3 | EtOHcl1 | EtOHcl2 | Galcl1 | YPDnc1 | YPDnc2 | YPDnc3 | YPDnc4 | EtOHnc1 | EtOHnc2 | Galnc1 | Galnc2 |
| 12 HXT5   | YHR096C | YPDcl2 | YPDcl3 | EtOHcl1 | EtOHcl2 | Galcl1 | YPDnc1 | YPDnc2 | YPDnc3 | YPDnc4 | EtOHnc1 | -       | Galnc1 | Galnc2 |
| 12 FIP1   | YJR093C | YPDcl2 | -      | EtOHcl1 | EtOHcl2 | Galcl1 | YPDnc1 | YPDnc2 | YPDnc3 | YPDnc4 | EtOHnc1 | EtOHnc2 | Galnc1 | Galnc2 |
| 12 YKU80  | YMR106C | YPDcl2 | YPDcl3 | EtOHcl1 | EtOHcl2 | Galcl1 | YPDnc1 | YPDnc2 | YPDnc3 | YPDnc4 | EtOHnc1 | -       | Galnc1 | Galnc2 |
| 12 NQM1   | YGR043C | YPDcl2 | YPDcl3 | EtOHcl1 | -       | Galcl1 | YPDnc1 | YPDnc2 | YPDnc3 | YPDnc4 | EtOHnc1 | EtOHnc2 | Galnc1 | Galnc2 |
| 12 MNN11  | YJL183W | YPDcl2 | YPDcl3 | EtOHcl1 | EtOHcl2 | Galcl1 | YPDnc1 | YPDnc2 | YPDnc3 | YPDnc4 | -       | EtOHnc2 | Galnc1 | Galnc2 |
| 12 ERG13  | YML126C | -      | YPDcl3 | EtOHcl1 | EtOHcl2 | Galcl1 | YPDnc1 | YPDnc2 | YPDnc3 | YPDnc4 | EtOHnc1 | EtOHnc2 | Galnc1 | Galnc2 |
| 12 ECM21  | YBL101C | YPDcl2 | YPDcl3 | EtOHcl1 | EtOHcl2 | Galcl1 | YPDnc1 | YPDnc2 | YPDnc3 | YPDnc4 | -       | EtOHnc2 | Galnc1 | Galnc2 |
| 12 AIM17  | YHL021C | YPDcl2 | YPDcl3 | EtOHcl1 | -       | Galcl1 | YPDnc1 | YPDnc2 | YPDnc3 | YPDnc4 | EtOHnc1 | EtOHnc2 | Galnc1 | Galnc2 |
| 12 SSO1   | YPL232W | -      | YPDcl3 | EtOHcl1 | EtOHcl2 | Galcl1 | YPDnc1 | YPDnc2 | YPDnc3 | YPDnc4 | EtOHnc1 | EtOHnc2 | Galnc1 | Galnc2 |
| 12 ACT1   | YFL039C | YPDcl2 | YPDcl3 | EtOHcl1 | EtOHcl2 | Galcl1 | YPDnc1 | YPDnc2 | YPDnc3 | -      | EtOHnc1 | EtOHnc2 | Galnc1 | Galnc2 |
| 12        | YLR164W | YPDcl2 | YPDcl3 | EtOHcl1 | -       | Galcl1 | YPDnc1 | YPDnc2 | YPDnc3 | YPDnc4 | EtOHnc1 | EtOHnc2 | Galnc1 | Galnc2 |
| 12        | YKR047W | -      | YPDcl3 | EtOHcl1 | EtOHcl2 | Galcl1 | YPDnc1 | YPDnc2 | YPDnc3 | YPDnc4 | EtOHnc1 | EtOHnc2 | Galnc1 | Galnc2 |
| 12        | YOR263C | YPDcl2 | YPDcl3 | EtOHcl1 | EtOHcl2 | -      | YPDnc1 | YPDnc2 | YPDnc3 | YPDnc4 | EtOHnc1 | EtOHnc2 | Galnc1 | Galnc2 |
| 12 RPL21B | YPL079W | YPDcl2 | YPDcl3 | EtOHcl1 | -       | Galcl1 | YPDnc1 | YPDnc2 | YPDnc3 | YPDnc4 | EtOHnc1 | EtOHnc2 | Galnc1 | Galnc2 |
| 12        | YHR182W | YPDcl2 | YPDcl3 | EtOHcl1 | EtOHcl2 | -      | YPDnc1 | YPDnc2 | YPDnc3 | YPDnc4 | EtOHnc1 | EtOHnc2 | Galnc1 | Galnc2 |
| 12        | YER137C | YPDcl2 | YPDcl3 | EtOHcl1 | EtOHcl2 | Galcl1 | YPDnc1 | YPDnc2 | YPDnc3 | YPDnc4 | EtOHnc1 | -       | Galnc1 | Galnc2 |
| 12 CHA4   | YLR098C | -      | YPDcl3 | EtOHcl1 | EtOHcl2 | Galcl1 | YPDnc1 | YPDnc2 | YPDnc3 | YPDnc4 | EtOHnc1 | EtOHnc2 | Galnc1 | Galnc2 |
| 12 HAT2   | YEL056W | YPDcl2 | -      | EtOHcl1 | EtOHcl2 | Galcl1 | YPDnc1 | YPDnc2 | YPDnc3 | YPDnc4 | EtOHnc1 | EtOHnc2 | Galnc1 | Galnc2 |
| 12 AVT7   | YIL088C | YPDcl2 | YPDcl3 | EtOHcl1 | -       | Galcl1 | YPDnc1 | YPDnc2 | YPDnc3 | YPDnc4 | EtOHnc1 | EtOHnc2 | Galnc1 | Galnc2 |
| 12 AGP1   | YCL025C | YPDcl2 | YPDcl3 | EtOHcl1 | -       | Galcl1 | YPDnc1 | YPDnc2 | YPDnc3 | YPDnc4 | EtOHnc1 | EtOHnc2 | Galnc1 | Galnc2 |
| 12 BNI1   | YNL271C | YPDcl2 | YPDcl3 | EtOHcl1 | -       | Galcl1 | YPDnc1 | YPDnc2 | YPDnc3 | YPDnc4 | EtOHnc1 | EtOHnc2 | Galnc1 | Galnc2 |
| 12 RIP1   | YEL024W | YPDcl2 | YPDcl3 | EtOHcl1 | EtOHcl2 | Galcl1 | YPDnc1 | YPDnc2 | YPDnc3 | YPDnc4 | EtOHnc1 | EtOHnc2 | -      | Galnc2 |

|          |           |        |        |         |         |        |        |        |        |        |         |         |        |        |
|----------|-----------|--------|--------|---------|---------|--------|--------|--------|--------|--------|---------|---------|--------|--------|
| 12 HXT2  | YMR011W   | YPDcl2 | YPDcl3 | -       | EtOHcl2 | Galcl1 | YPDnc1 | YPDnc2 | YPDnc3 | YPDnc4 | EtOHnc1 | EtOHnc2 | Galnc1 | Galnc2 |
| 12       | YJL218W   | YPDcl2 | -      | EtOHcl1 | EtOHcl2 | Galcl1 | YPDnc1 | YPDnc2 | YPDnc3 | YPDnc4 | EtOHnc1 | EtOHnc2 | Galnc1 | Galnc2 |
| 12 RPS8A | YBL072C   | YPDcl2 | YPDcl3 | EtOHcl1 | EtOHcl2 | Galcl1 | YPDnc1 | YPDnc2 | YPDnc3 | YPDnc4 | EtOHnc1 | EtOHnc2 | -      | Galnc2 |
| 12 RSC6  | YCR052W   | YPDcl2 | YPDcl3 | EtOHcl1 | EtOHcl2 | -      | YPDnc1 | YPDnc2 | YPDnc3 | YPDnc4 | EtOHnc1 | EtOHnc2 | Galnc1 | Galnc2 |
| 12 PDR11 | YIL013C   | YPDcl2 | -      | EtOHcl1 | EtOHcl2 | Galcl1 | YPDnc1 | YPDnc2 | YPDnc3 | YPDnc4 | EtOHnc1 | EtOHnc2 | Galnc1 | Galnc2 |
| 12 NCA3  | YJL116C   | YPDcl2 | YPDcl3 | EtOHcl1 | -       | Galcl1 | YPDnc1 | YPDnc2 | YPDnc3 | YPDnc4 | EtOHnc1 | EtOHnc2 | Galnc1 | Galnc2 |
| 12       | YMR187C   | -      | YPDcl3 | EtOHcl1 | EtOHcl2 | Galcl1 | YPDnc1 | YPDnc2 | YPDnc3 | YPDnc4 | EtOHnc1 | EtOHnc2 | Galnc1 | Galnc2 |
| 12 PIC2  | YER053C   | YPDcl2 | YPDcl3 | EtOHcl1 | EtOHcl2 | Galcl1 | YPDnc1 | YPDnc2 | YPDnc3 | YPDnc4 | EtOHnc1 | -       | Galnc1 | Galnc2 |
| 12 RRS1  | YOR294W   | YPDcl2 | YPDcl3 | EtOHcl1 | EtOHcl2 | Galcl1 | YPDnc1 | YPDnc2 | YPDnc3 | YPDnc4 | EtOHnc1 | -       | Galnc1 | Galnc2 |
| 12 TPO4  | YOR273C   | YPDcl2 | YPDcl3 | EtOHcl1 | EtOHcl2 | Galcl1 | YPDnc1 | YPDnc2 | YPDnc3 | YPDnc4 | EtOHnc1 | -       | Galnc1 | Galnc2 |
| 12 EFT1  | YOR133W   | YPDcl2 | YPDcl3 | EtOHcl1 | -       | Galcl1 | YPDnc1 | YPDnc2 | YPDnc3 | YPDnc4 | EtOHnc1 | EtOHnc2 | Galnc1 | Galnc2 |
| 12 HSK3  | YKL138C-A | YPDcl2 | YPDcl3 | EtOHcl1 | EtOHcl2 | Galcl1 | -      | YPDnc2 | YPDnc3 | YPDnc4 | EtOHnc1 | EtOHnc2 | Galnc1 | Galnc2 |
| 12 ALG14 | YBR070C   | YPDcl2 | YPDcl3 | EtOHcl1 | -       | Galcl1 | YPDnc1 | YPDnc2 | YPDnc3 | YPDnc4 | EtOHnc1 | EtOHnc2 | Galnc1 | Galnc2 |
| 12 RPB8  | YOR224C   | YPDcl2 | YPDcl3 | EtOHcl1 | EtOHcl2 | Galcl1 | YPDnc1 | YPDnc2 | YPDnc3 | YPDnc4 | EtOHnc1 | EtOHnc2 | Galnc1 | -      |
| 12       | YNR005C   | -      | YPDcl3 | EtOHcl1 | EtOHcl2 | Galcl1 | YPDnc1 | YPDnc2 | YPDnc3 | YPDnc4 | EtOHnc1 | EtOHnc2 | Galnc1 | Galnc2 |
| 12 HSE1  | YHL002W   | YPDcl2 | -      | EtOHcl1 | EtOHcl2 | Galcl1 | YPDnc1 | YPDnc2 | YPDnc3 | YPDnc4 | EtOHnc1 | EtOHnc2 | Galnc1 | Galnc2 |
| 12 DBP10 | YDL031W   | YPDcl2 | YPDcl3 | EtOHcl1 | -       | Galcl1 | YPDnc1 | YPDnc2 | YPDnc3 | YPDnc4 | EtOHnc1 | EtOHnc2 | Galnc1 | Galnc2 |
| 12 YSW1  | YBR148W   | YPDcl2 | YPDcl3 | EtOHcl1 | EtOHcl2 | Galcl1 | YPDnc1 | YPDnc2 | YPDnc3 | YPDnc4 | EtOHnc1 | -       | Galnc1 | Galnc2 |
| 12       | YIL071W-A | YPDcl2 | YPDcl3 | EtOHcl1 | EtOHcl2 | Galcl1 | -      | YPDnc2 | YPDnc3 | YPDnc4 | EtOHnc1 | EtOHnc2 | Galnc1 | Galnc2 |
| 12       | YLR347W-A | -      | YPDcl3 | EtOHcl1 | EtOHcl2 | Galcl1 | YPDnc1 | YPDnc2 | YPDnc3 | YPDnc4 | EtOHnc1 | EtOHnc2 | Galnc1 | Galnc2 |
| 12 AVT1  | YJR001W   | -      | YPDcl3 | EtOHcl1 | EtOHcl2 | Galcl1 | YPDnc1 | YPDnc2 | YPDnc3 | YPDnc4 | EtOHnc1 | EtOHnc2 | Galnc1 | Galnc2 |
| 12 URK1  | YNR012W   | -      | YPDcl3 | EtOHcl1 | EtOHcl2 | Galcl1 | YPDnc1 | YPDnc2 | YPDnc3 | YPDnc4 | EtOHnc1 | EtOHnc2 | Galnc1 | Galnc2 |
| 12       | YHL012W   | -      | YPDcl3 | EtOHcl1 | EtOHcl2 | Galcl1 | YPDnc1 | YPDnc2 | YPDnc3 | YPDnc4 | EtOHnc1 | EtOHnc2 | Galnc1 | Galnc2 |
| 12       | YOR268C   | YPDcl2 | YPDcl3 | EtOHcl1 | -       | Galcl1 | YPDnc1 | YPDnc2 | YPDnc3 | YPDnc4 | EtOHnc1 | EtOHnc2 | Galnc1 | Galnc2 |
| 12 BIO2  | YGR286C   | YPDcl2 | -      | EtOHcl1 | EtOHcl2 | Galcl1 | YPDnc1 | YPDnc2 | YPDnc3 | YPDnc4 | EtOHnc1 | EtOHnc2 | Galnc1 | Galnc2 |
| 12 TOM6  | YOR045W   | YPDcl2 | YPDcl3 | EtOHcl1 | EtOHcl2 | Galcl1 | YPDnc1 | YPDnc2 | -      | YPDnc4 | EtOHnc1 | EtOHnc2 | Galnc1 | Galnc2 |
| 12 ECM18 | YDR125C   | YPDcl2 | YPDcl3 | EtOHcl1 | EtOHcl2 | Galcl1 | -      | YPDnc2 | YPDnc3 | YPDnc4 | EtOHnc1 | EtOHnc2 | Galnc1 | Galnc2 |
| 12 MEX67 | YPL169C   | YPDcl2 | YPDcl3 | EtOHcl1 | EtOHcl2 | Galcl1 | YPDnc1 | YPDnc2 | YPDnc3 | YPDnc4 | EtOHnc1 | -       | Galnc1 | Galnc2 |
| 12 TRP4  | YDR354W   | YPDcl2 | -      | EtOHcl1 | EtOHcl2 | Galcl1 | YPDnc1 | YPDnc2 | YPDnc3 | YPDnc4 | EtOHnc1 | EtOHnc2 | Galnc1 | Galnc2 |
| 12 PTR3  | YFR029W   | -      | YPDcl3 | EtOHcl1 | EtOHcl2 | Galcl1 | YPDnc1 | YPDnc2 | YPDnc3 | YPDnc4 | EtOHnc1 | EtOHnc2 | Galnc1 | Galnc2 |
| 12 DBF2  | YGR092W   | -      | YPDcl3 | EtOHcl1 | EtOHcl2 | Galcl1 | YPDnc1 | YPDnc2 | YPDnc3 | YPDnc4 | EtOHnc1 | EtOHnc2 | Galnc1 | Galnc2 |
| 12 MMS21 | YEL019C   | YPDcl2 | YPDcl3 | EtOHcl1 | EtOHcl2 | Galcl1 | -      | YPDnc2 | YPDnc3 | YPDnc4 | EtOHnc1 | EtOHnc2 | Galnc1 | Galnc2 |
| 12 RPN6  | YDL097C   | YPDcl2 | -      | EtOHcl1 | EtOHcl2 | Galcl1 | YPDnc1 | YPDnc2 | YPDnc3 | YPDnc4 | EtOHnc1 | EtOHnc2 | Galnc1 | Galnc2 |
| 12 CAB4  | YGR277C   | YPDcl2 | -      | EtOHcl1 | EtOHcl2 | Galcl1 | YPDnc1 | YPDnc2 | YPDnc3 | YPDnc4 | EtOHnc1 | EtOHnc2 | Galnc1 | Galnc2 |

|    |        |           |        |        |         |         |        |        |        |        |        |         |         |        |        |
|----|--------|-----------|--------|--------|---------|---------|--------|--------|--------|--------|--------|---------|---------|--------|--------|
| 12 | IME1   | YJR094C   | YPDcl2 | YPDcl3 | EtOHcl1 | -       | Galcl1 | YPDnc1 | YPDnc2 | YPDnc3 | YPDnc4 | EtOHnc1 | EtOHnc2 | Galnc1 | Galnc2 |
| 12 |        | YDR355C   | YPDcl2 | YPDcl3 | EtOHcl1 | EtOHcl2 | Galcl1 | YPDnc1 | YPDnc2 | YPDnc3 | YPDnc4 | EtOHnc1 | EtOHnc2 | Galnc1 | -      |
| 12 | LSP1   | YPL004C   | YPDcl2 | YPDcl3 | EtOHcl1 | EtOHcl2 | Galcl1 | YPDnc1 | YPDnc2 | YPDnc3 | YPDnc4 | EtOHnc1 | -       | Galnc1 | Galnc2 |
| 12 |        | YOR082C   | YPDcl2 | YPDcl3 | EtOHcl1 | EtOHcl2 | -      | YPDnc1 | YPDnc2 | YPDnc3 | YPDnc4 | EtOHnc1 | EtOHnc2 | Galnc1 | Galnc2 |
| 12 | NSE5   | YML023C   | YPDcl2 | -      | EtOHcl1 | EtOHcl2 | Galcl1 | YPDnc1 | YPDnc2 | YPDnc3 | YPDnc4 | EtOHnc1 | EtOHnc2 | Galnc1 | Galnc2 |
| 12 |        | YLR400W   | YPDcl2 | YPDcl3 | EtOHcl1 | EtOHcl2 | Galcl1 | YPDnc1 | -      | YPDnc3 | YPDnc4 | EtOHnc1 | EtOHnc2 | Galnc1 | Galnc2 |
| 12 | PCL9   | YDL179W   | YPDcl2 | YPDcl3 | -       | EtOHcl2 | Galcl1 | YPDnc1 | YPDnc2 | YPDnc3 | YPDnc4 | EtOHnc1 | EtOHnc2 | Galnc1 | Galnc2 |
| 12 |        | YOR364W   | YPDcl2 | YPDcl3 | EtOHcl1 | -       | Galcl1 | YPDnc1 | YPDnc2 | YPDnc3 | YPDnc4 | EtOHnc1 | EtOHnc2 | Galnc1 | Galnc2 |
| 12 | BUD22  | YMR014W   | YPDcl2 | YPDcl3 | -       | EtOHcl2 | Galcl1 | YPDnc1 | YPDnc2 | YPDnc3 | YPDnc4 | EtOHnc1 | EtOHnc2 | Galnc1 | Galnc2 |
| 12 | GMH1   | YKR030W   | YPDcl2 | YPDcl3 | -       | EtOHcl2 | Galcl1 | YPDnc1 | YPDnc2 | YPDnc3 | YPDnc4 | EtOHnc1 | EtOHnc2 | Galnc1 | Galnc2 |
| 12 | SDS24  | YBR214W   | YPDcl2 | YPDcl3 | EtOHcl1 | EtOHcl2 | Galcl1 | YPDnc1 | YPDnc2 | YPDnc3 | -      | EtOHnc1 | EtOHnc2 | Galnc1 | Galnc2 |
| 11 |        | YEL008C-A | YPDcl2 | YPDcl3 | EtOHcl1 | -       | Galcl1 | YPDnc1 | YPDnc2 | YPDnc3 | -      | EtOHnc1 | EtOHnc2 | Galnc1 | Galnc2 |
| 11 | YBP2   | YGL060W   | YPDcl2 | YPDcl3 | EtOHcl1 | EtOHcl2 | Galcl1 | YPDnc1 | YPDnc2 | YPDnc3 | YPDnc4 | -       | EtOHnc2 | Galnc1 | -      |
| 11 | MRPL11 | YDL202W   | YPDcl2 | YPDcl3 | EtOHcl1 | -       | -      | YPDnc1 | YPDnc2 | YPDnc3 | YPDnc4 | EtOHnc1 | EtOHnc2 | Galnc1 | Galnc2 |
| 11 | CTR1   | YPR124W   | YPDcl2 | -      | EtOHcl1 | EtOHcl2 | Galcl1 | YPDnc1 | -      | YPDnc3 | YPDnc4 | EtOHnc1 | EtOHnc2 | Galnc1 | Galnc2 |
| 11 | PMR1   | YGL167C   | YPDcl2 | YPDcl3 | EtOHcl1 | EtOHcl2 | Galcl1 | YPDnc1 | -      | YPDnc3 | -      | EtOHnc1 | EtOHnc2 | Galnc1 | Galnc2 |
| 11 | DCS1   | YLR270W   | YPDcl2 | YPDcl3 | EtOHcl1 | -       | Galcl1 | YPDnc1 | -      | YPDnc3 | YPDnc4 | EtOHnc1 | EtOHnc2 | Galnc1 | Galnc2 |
| 11 | LCB1   | YMR296C   | YPDcl2 | YPDcl3 | -       | -       | Galcl1 | YPDnc1 | YPDnc2 | YPDnc3 | YPDnc4 | EtOHnc1 | EtOHnc2 | Galnc1 | Galnc2 |
| 11 | COX23  | YHR116W   | -      | -      | EtOHcl1 | EtOHcl2 | Galcl1 | YPDnc1 | YPDnc2 | YPDnc3 | YPDnc4 | EtOHnc1 | EtOHnc2 | Galnc1 | Galnc2 |
| 11 | ECM23  | YPL021W   | YPDcl2 | YPDcl3 | EtOHcl1 | EtOHcl2 | Galcl1 | -      | YPDnc2 | YPDnc3 | YPDnc4 | EtOHnc1 | EtOHnc2 | Galnc1 | -      |
| 11 | TAX4   | YJL083W   | -      | YPDcl3 | EtOHcl1 | -       | Galcl1 | YPDnc1 | YPDnc2 | YPDnc3 | YPDnc4 | EtOHnc1 | EtOHnc2 | Galnc1 | Galnc2 |
| 11 |        | YMR315W   | YPDcl2 | YPDcl3 | EtOHcl1 | EtOHcl2 | Galcl1 | -      | -      | YPDnc3 | YPDnc4 | EtOHnc1 | EtOHnc2 | Galnc1 | Galnc2 |
| 11 |        | YDR467C   | YPDcl2 | YPDcl3 | EtOHcl1 | -       | Galcl1 | -      | YPDnc2 | YPDnc3 | YPDnc4 | EtOHnc1 | EtOHnc2 | Galnc1 | Galnc2 |
| 11 | CTR3   | YLR411W   | -      | YPDcl3 | EtOHcl1 | EtOHcl2 | -      | YPDnc1 | YPDnc2 | YPDnc3 | YPDnc4 | EtOHnc1 | EtOHnc2 | Galnc1 | Galnc2 |
| 11 | SUB1   | YMR039C   | YPDcl2 | YPDcl3 | EtOHcl1 | -       | Galcl1 | YPDnc1 | -      | YPDnc3 | YPDnc4 | EtOHnc1 | EtOHnc2 | Galnc1 | Galnc2 |
| 11 | ATH1   | YPR026W   | YPDcl2 | YPDcl3 | EtOHcl1 | EtOHcl2 | Galcl1 | YPDnc1 | -      | -      | YPDnc4 | EtOHnc1 | EtOHnc2 | Galnc1 | Galnc2 |
| 11 | CWP2   | YKL096W-  | YPDcl2 | -      | EtOHcl1 | EtOHcl2 | Galcl1 | YPDnc1 | YPDnc2 | YPDnc3 | -      | EtOHnc1 | EtOHnc2 | Galnc1 | Galnc2 |
| 11 | VPS74  | YDR372C   | YPDcl2 | YPDcl3 | EtOHcl1 | EtOHcl2 | Galcl1 | YPDnc1 | -      | -      | YPDnc4 | EtOHnc1 | EtOHnc2 | Galnc1 | Galnc2 |
| 11 | FLR1   | YBR008C   | YPDcl2 | YPDcl3 | EtOHcl1 | EtOHcl2 | Galcl1 | -      | YPDnc2 | YPDnc3 | YPDnc4 | EtOHnc1 | EtOHnc2 | Galnc1 | -      |
| 11 | CLB4   | YLR210W   | YPDcl2 | YPDcl3 | EtOHcl1 | EtOHcl2 | Galcl1 | -      | YPDnc2 | YPDnc3 | YPDnc4 | -       | EtOHnc2 | Galnc1 | Galnc2 |
| 11 |        | YDL025C   | YPDcl2 | -      | EtOHcl1 | EtOHcl2 | Galcl1 | -      | YPDnc2 | YPDnc3 | YPDnc4 | EtOHnc1 | EtOHnc2 | Galnc1 | Galnc2 |
| 11 | AAD4   | YDL243C   | -      | -      | EtOHcl1 | EtOHcl2 | Galcl1 | YPDnc1 | YPDnc2 | YPDnc3 | YPDnc4 | EtOHnc1 | EtOHnc2 | Galnc1 | Galnc2 |
| 11 | ATG26  | YLR189C   | -      | -      | EtOHcl1 | EtOHcl2 | Galcl1 | YPDnc1 | YPDnc2 | YPDnc3 | YPDnc4 | EtOHnc1 | EtOHnc2 | Galnc1 | Galnc2 |
| 11 |        | YLR416C   | -      | YPDcl3 | EtOHcl1 | EtOHcl2 | Galcl1 | YPDnc1 | -      | YPDnc3 | YPDnc4 | EtOHnc1 | EtOHnc2 | Galnc1 | Galnc2 |



|    |       |           |        |        |         |         |        |        |        |        |        |         |         |        |        |
|----|-------|-----------|--------|--------|---------|---------|--------|--------|--------|--------|--------|---------|---------|--------|--------|
| 11 | RHO5  | YNL180C   | YPDcl2 | YPDcl3 | EtOHcl1 | -       | -      | YPDnc1 | YPDnc2 | YPDnc3 | YPDnc4 | EtOHnc1 | EtOHnc2 | Galnc1 | Galnc2 |
| 11 | SLS1  | YLR139C   | -      | YPDcl3 | EtOHcl1 | -       | Galcl1 | YPDnc1 | YPDnc2 | YPDnc3 | YPDnc4 | EtOHnc1 | EtOHnc2 | Galnc1 | Galnc2 |
| 11 | LEU4  | YNL104C   | -      | YPDcl3 | EtOHcl1 | -       | Galcl1 | YPDnc1 | YPDnc2 | YPDnc3 | YPDnc4 | EtOHnc1 | EtOHnc2 | Galnc1 | Galnc2 |
| 11 | MST1  | YKL194C   | YPDcl2 | YPDcl3 | -       | EtOHcl2 | Galcl1 | YPDnc1 | YPDnc2 | YPDnc3 | YPDnc4 | EtOHnc1 | EtOHnc2 | -      | Galnc2 |
| 11 | YEF3  | YLR249W   | YPDcl2 | YPDcl3 | -       | EtOHcl2 | Galcl1 | YPDnc1 | YPDnc2 | YPDnc3 | YPDnc4 | EtOHnc1 | -       | Galnc1 | Galnc2 |
| 11 | TMA46 | YOR091W   | YPDcl2 | -      | EtOHcl1 | EtOHcl2 | Galcl1 | YPDnc1 | YPDnc2 | YPDnc3 | YPDnc4 | EtOHnc1 | -       | Galnc1 | Galnc2 |
| 11 | GFA1  | YKL104C   | -      | YPDcl3 | EtOHcl1 | -       | Galcl1 | YPDnc1 | YPDnc2 | YPDnc3 | YPDnc4 | EtOHnc1 | EtOHnc2 | Galnc1 | Galnc2 |
| 11 | MPM1  | YJL066C   | YPDcl2 | -      | EtOHcl1 | -       | Galcl1 | YPDnc1 | YPDnc2 | YPDnc3 | YPDnc4 | EtOHnc1 | EtOHnc2 | Galnc1 | Galnc2 |
| 11 | CLA4  | YNL298W   | YPDcl2 | -      | EtOHcl1 | -       | Galcl1 | YPDnc1 | YPDnc2 | YPDnc3 | YPDnc4 | EtOHnc1 | EtOHnc2 | Galnc1 | Galnc2 |
| 11 | PEX13 | YLR191W   | -      | YPDcl3 | EtOHcl1 | EtOHcl2 | Galcl1 | YPDnc1 | YPDnc2 | YPDnc3 | -      | EtOHnc1 | EtOHnc2 | Galnc1 | Galnc2 |
| 11 | PRP4  | YPR178W   | YPDcl2 | YPDcl3 | EtOHcl1 | EtOHcl2 | Galcl1 | -      | YPDnc2 | -      | YPDnc4 | EtOHnc1 | EtOHnc2 | Galnc1 | Galnc2 |
| 11 | RHO3  | YIL118W   | -      | YPDcl3 | EtOHcl1 | -       | Galcl1 | YPDnc1 | YPDnc2 | YPDnc3 | YPDnc4 | EtOHnc1 | EtOHnc2 | Galnc1 | Galnc2 |
| 11 | SEC21 | YNL287W   | YPDcl2 | YPDcl3 | -       | EtOHcl2 | Galcl1 | YPDnc1 | YPDnc2 | YPDnc3 | YPDnc4 | EtOHnc1 | -       | Galnc1 | Galnc2 |
| 11 |       | YLR269C   | -      | YPDcl3 | EtOHcl1 | EtOHcl2 | Galcl1 | YPDnc1 | YPDnc2 | YPDnc3 | YPDnc4 | EtOHnc1 | -       | Galnc1 | Galnc2 |
| 11 | BRP1  | YGL007W   | -      | -      | EtOHcl1 | EtOHcl2 | Galcl1 | YPDnc1 | YPDnc2 | YPDnc3 | YPDnc4 | EtOHnc1 | EtOHnc2 | Galnc1 | Galnc2 |
| 11 | STT3  | YGL022W   | YPDcl2 | -      | EtOHcl1 | -       | Galcl1 | YPDnc1 | YPDnc2 | YPDnc3 | YPDnc4 | EtOHnc1 | EtOHnc2 | Galnc1 | Galnc2 |
| 11 | HST4  | YDR191W   | -      | -      | EtOHcl1 | EtOHcl2 | Galcl1 | YPDnc1 | YPDnc2 | YPDnc3 | YPDnc4 | EtOHnc1 | EtOHnc2 | Galnc1 | Galnc2 |
| 11 | SBE22 | YHR103W   | YPDcl2 | YPDcl3 | -       | EtOHcl2 | Galcl1 | YPDnc1 | YPDnc2 | -      | YPDnc4 | EtOHnc1 | EtOHnc2 | Galnc1 | Galnc2 |
| 11 | TPO2  | YGR138C   | -      | YPDcl3 | EtOHcl1 | EtOHcl2 | Galcl1 | YPDnc1 | YPDnc2 | -      | YPDnc4 | EtOHnc1 | EtOHnc2 | Galnc1 | Galnc2 |
| 11 | TEM1  | YML064C   | YPDcl2 | YPDcl3 | EtOHcl1 | EtOHcl2 | -      | YPDnc1 | YPDnc2 | YPDnc3 | YPDnc4 | EtOHnc1 | EtOHnc2 | -      | Galnc2 |
| 11 | BET2  | YPR176C   | YPDcl2 | YPDcl3 | EtOHcl1 | EtOHcl2 | Galcl1 | YPDnc1 | YPDnc2 | YPDnc3 | YPDnc4 | -       | EtOHnc2 | Galnc1 | -      |
| 11 |       | YAL037C-B | YPDcl2 | YPDcl3 | EtOHcl1 | EtOHcl2 | Galcl1 | YPDnc1 | YPDnc2 | YPDnc3 | YPDnc4 | -       | EtOHnc2 | Galnc1 | -      |
| 11 | IRC25 | YLR021W   | YPDcl2 | YPDcl3 | EtOHcl1 | EtOHcl2 | Galcl1 | -      | YPDnc2 | YPDnc3 | YPDnc4 | -       | EtOHnc2 | Galnc1 | Galnc2 |
| 11 |       | YKL036C   | YPDcl2 | YPDcl3 | -       | EtOHcl2 | Galcl1 | YPDnc1 | YPDnc2 | YPDnc3 | YPDnc4 | EtOHnc1 | -       | Galnc1 | Galnc2 |
| 11 | FMP40 | YPL222W   | YPDcl2 | YPDcl3 | EtOHcl1 | EtOHcl2 | Galcl1 | YPDnc1 | -      | -      | YPDnc4 | EtOHnc1 | EtOHnc2 | Galnc1 | Galnc2 |
| 11 |       | YLR455W   | YPDcl2 | -      | EtOHcl1 | EtOHcl2 | Galcl1 | YPDnc1 | YPDnc2 | YPDnc3 | YPDnc4 | EtOHnc1 | EtOHnc2 | Galnc1 | -      |
| 11 |       | YER097W   | YPDcl2 | -      | EtOHcl1 | EtOHcl2 | -      | YPDnc1 | YPDnc2 | YPDnc3 | YPDnc4 | EtOHnc1 | EtOHnc2 | Galnc1 | Galnc2 |
| 11 | TAT1  | YBR069C   | -      | YPDcl3 | EtOHcl1 | -       | Galcl1 | YPDnc1 | YPDnc2 | YPDnc3 | YPDnc4 | EtOHnc1 | EtOHnc2 | Galnc1 | Galnc2 |
| 11 | AMD1  | YML035C   | -      | YPDcl3 | EtOHcl1 | -       | Galcl1 | YPDnc1 | YPDnc2 | YPDnc3 | YPDnc4 | EtOHnc1 | EtOHnc2 | Galnc1 | Galnc2 |
| 11 |       | YDR357C   | YPDcl2 | YPDcl3 | EtOHcl1 | -       | -      | YPDnc1 | YPDnc2 | YPDnc3 | YPDnc4 | EtOHnc1 | EtOHnc2 | Galnc1 | Galnc2 |
| 11 | RIX1  | YHR197W   | -      | YPDcl3 | EtOHcl1 | EtOHcl2 | -      | YPDnc1 | YPDnc2 | YPDnc3 | YPDnc4 | EtOHnc1 | EtOHnc2 | Galnc1 | Galnc2 |
| 11 | CST6  | YIL036W   | -      | YPDcl3 | EtOHcl1 | -       | Galcl1 | YPDnc1 | YPDnc2 | YPDnc3 | YPDnc4 | EtOHnc1 | EtOHnc2 | Galnc1 | Galnc2 |
| 11 |       | YOL086W-  | YPDcl2 | YPDcl3 | EtOHcl1 | EtOHcl2 | Galcl1 | YPDnc1 | YPDnc2 | YPDnc3 | YPDnc4 | -       | -       | Galnc1 | Galnc2 |
| 11 | BTN2  | YGR142W   | YPDcl2 | YPDcl3 | EtOHcl1 | -       | Galcl1 | YPDnc1 | -      | YPDnc3 | YPDnc4 | EtOHnc1 | EtOHnc2 | Galnc1 | Galnc2 |

|    |        |           |        |        |         |         |        |        |        |        |        |         |         |        |        |
|----|--------|-----------|--------|--------|---------|---------|--------|--------|--------|--------|--------|---------|---------|--------|--------|
| 11 | APT2   | YDR441C   | YPDcl2 | YPDcl3 | EtOHcl1 | -       | Galcl1 | YPDnc1 | YPDnc2 | YPDnc3 | YPDnc4 | -       | EtOHnc2 | Galnc1 | Galnc2 |
| 11 | RPL17B | YJL177W   | -      | -      | EtOHcl1 | EtOHcl2 | Galcl1 | YPDnc1 | YPDnc2 | YPDnc3 | YPDnc4 | EtOHnc1 | EtOHnc2 | Galnc1 | Galnc2 |
| 11 | CDC8   | YJR057W   | YPDcl2 | YPDcl3 | EtOHcl1 | EtOHcl2 | Galcl1 | YPDnc1 | YPDnc2 | -      | YPDnc4 | -       | EtOHnc2 | Galnc1 | Galnc2 |
| 11 | MSB2   | YGR014W   | YPDcl2 | -      | EtOHcl1 | EtOHcl2 | Galcl1 | YPDnc1 | YPDnc2 | YPDnc3 | YPDnc4 | -       | EtOHnc2 | Galnc1 | Galnc2 |
| 11 | SOD2   | YHR008C   | -      | -      | EtOHcl1 | EtOHcl2 | Galcl1 | YPDnc1 | YPDnc2 | YPDnc3 | YPDnc4 | EtOHnc1 | EtOHnc2 | Galnc1 | Galnc2 |
| 11 | SMI1   | YGR229C   | -      | YPDcl3 | -       | EtOHcl2 | Galcl1 | YPDnc1 | YPDnc2 | YPDnc3 | YPDnc4 | EtOHnc1 | EtOHnc2 | Galnc1 | Galnc2 |
| 11 | KNH1   | YDL049C   | YPDcl2 | YPDcl3 | EtOHcl1 | EtOHcl2 | Galcl1 | YPDnc1 | -      | YPDnc3 | YPDnc4 | EtOHnc1 | -       | Galnc1 | Galnc2 |
| 11 |        | YJL022W   | -      | YPDcl3 | -       | EtOHcl2 | Galcl1 | YPDnc1 | YPDnc2 | YPDnc3 | YPDnc4 | EtOHnc1 | EtOHnc2 | Galnc1 | Galnc2 |
| 11 | ZPR1   | YGR211W   | -      | YPDcl3 | EtOHcl1 | -       | Galcl1 | YPDnc1 | YPDnc2 | YPDnc3 | YPDnc4 | EtOHnc1 | EtOHnc2 | Galnc1 | Galnc2 |
| 11 |        | YCL076W   | YPDcl2 | YPDcl3 | -       | EtOHcl2 | Galcl1 | YPDnc1 | YPDnc2 | YPDnc3 | YPDnc4 | EtOHnc1 | -       | Galnc1 | Galnc2 |
| 11 | SLA1   | YBL007C   | YPDcl2 | YPDcl3 | EtOHcl1 | EtOHcl2 | Galcl1 | -      | -      | YPDnc3 | YPDnc4 | EtOHnc1 | EtOHnc2 | Galnc1 | Galnc2 |
| 11 | TGL2   | YDR058C   | YPDcl2 | YPDcl3 | -       | EtOHcl2 | Galcl1 | YPDnc1 | YPDnc2 | YPDnc3 | -      | EtOHnc1 | EtOHnc2 | Galnc1 | Galnc2 |
| 11 | CFD1   | YIL003W   | YPDcl2 | YPDcl3 | -       | -       | Galcl1 | YPDnc1 | YPDnc2 | YPDnc3 | YPDnc4 | EtOHnc1 | EtOHnc2 | Galnc1 | Galnc2 |
| 11 | ROM1   | YGR070W   | YPDcl2 | -      | EtOHcl1 | EtOHcl2 | Galcl1 | YPDnc1 | YPDnc2 | YPDnc3 | YPDnc4 | EtOHnc1 | EtOHnc2 | -      | Galnc2 |
| 11 |        | YGL102C   | YPDcl2 | YPDcl3 | EtOHcl1 | EtOHcl2 | Galcl1 | -      | YPDnc2 | YPDnc3 | YPDnc4 | EtOHnc1 | -       | Galnc1 | Galnc2 |
| 11 | CBS2   | YDR197W   | -      | YPDcl3 | -       | EtOHcl2 | Galcl1 | YPDnc1 | YPDnc2 | YPDnc3 | YPDnc4 | EtOHnc1 | EtOHnc2 | Galnc1 | Galnc2 |
| 11 | FAS1   | YKL182W   | YPDcl2 | YPDcl3 | EtOHcl1 | EtOHcl2 | Galcl1 | YPDnc1 | -      | YPDnc3 | -      | EtOHnc1 | EtOHnc2 | Galnc1 | Galnc2 |
| 11 | STN1   | YDR082W   | -      | YPDcl3 | EtOHcl1 | -       | Galcl1 | YPDnc1 | YPDnc2 | YPDnc3 | YPDnc4 | EtOHnc1 | EtOHnc2 | Galnc1 | Galnc2 |
| 11 | BUD27  | YFL023W   | -      | YPDcl3 | EtOHcl1 | EtOHcl2 | Galcl1 | YPDnc1 | YPDnc2 | YPDnc3 | -      | EtOHnc1 | EtOHnc2 | Galnc1 | Galnc2 |
| 11 | ENO2   | YHR174W   | YPDcl2 | YPDcl3 | EtOHcl1 | -       | Galcl1 | YPDnc1 | YPDnc2 | -      | YPDnc4 | EtOHnc1 | EtOHnc2 | Galnc1 | Galnc2 |
| 11 |        | YDR061W   | -      | -      | EtOHcl1 | EtOHcl2 | Galcl1 | YPDnc1 | YPDnc2 | YPDnc3 | YPDnc4 | EtOHnc1 | EtOHnc2 | Galnc1 | Galnc2 |
| 11 | MIS1   | YBR084W   | YPDcl2 | -      | EtOHcl1 | EtOHcl2 | Galcl1 | YPDnc1 | -      | YPDnc3 | YPDnc4 | EtOHnc1 | EtOHnc2 | Galnc1 | Galnc2 |
| 11 |        | YKL111C   | -      | YPDcl3 | EtOHcl1 | -       | Galcl1 | YPDnc1 | YPDnc2 | YPDnc3 | YPDnc4 | EtOHnc1 | EtOHnc2 | Galnc1 | Galnc2 |
| 11 | PDA1   | YER178W   | YPDcl2 | YPDcl3 | EtOHcl1 | -       | Galcl1 | YPDnc1 | YPDnc2 | YPDnc3 | YPDnc4 | EtOHnc1 | EtOHnc2 | Galnc1 | -      |
| 11 | KTR2   | YKR061W   | YPDcl2 | YPDcl3 | EtOHcl1 | EtOHcl2 | Galcl1 | YPDnc1 | -      | YPDnc3 | -      | EtOHnc1 | EtOHnc2 | Galnc1 | Galnc2 |
| 11 | ACM1   | YPL267W   | YPDcl2 | -      | EtOHcl1 | -       | Galcl1 | YPDnc1 | YPDnc2 | YPDnc3 | YPDnc4 | EtOHnc1 | EtOHnc2 | Galnc1 | Galnc2 |
| 11 | LAP2   | YNL045W   | YPDcl2 | YPDcl3 | EtOHcl1 | EtOHcl2 | Galcl1 | YPDnc1 | YPDnc2 | YPDnc3 | YPDnc4 | -       | EtOHnc2 | -      | Galnc2 |
| 11 | SHQ1   | YIL104C   | YPDcl2 | -      | EtOHcl1 | -       | Galcl1 | YPDnc1 | YPDnc2 | YPDnc3 | YPDnc4 | EtOHnc1 | EtOHnc2 | Galnc1 | Galnc2 |
| 11 | FMP27  | YLR454W   | YPDcl2 | -      | EtOHcl1 | EtOHcl2 | Galcl1 | YPDnc1 | YPDnc2 | YPDnc3 | YPDnc4 | EtOHnc1 | EtOHnc2 | Galnc1 | -      |
| 11 | DOG2   | YHR043C   | YPDcl2 | YPDcl3 | EtOHcl1 | EtOHcl2 | Galcl1 | YPDnc1 | YPDnc2 | -      | YPDnc4 | -       | EtOHnc2 | Galnc1 | Galnc2 |
| 11 |        | YHR070C-A | YPDcl2 | YPDcl3 | EtOHcl1 | EtOHcl2 | Galcl1 | -      | YPDnc2 | YPDnc3 | YPDnc4 | EtOHnc1 | EtOHnc2 | Galnc1 | -      |
| 11 |        | YMR144W   | YPDcl2 | -      | EtOHcl1 | EtOHcl2 | -      | YPDnc1 | YPDnc2 | YPDnc3 | YPDnc4 | EtOHnc1 | EtOHnc2 | Galnc1 | Galnc2 |
| 11 | ATG15  | YCR068W   | YPDcl2 | YPDcl3 | -       | EtOHcl2 | Galcl1 | YPDnc1 | YPDnc2 | -      | YPDnc4 | EtOHnc1 | EtOHnc2 | Galnc1 | Galnc2 |
| 11 |        | YGR151C   | YPDcl2 | YPDcl3 | EtOHcl1 | EtOHcl2 | Galcl1 | YPDnc1 | YPDnc2 | -      | YPDnc4 | EtOHnc1 | -       | Galnc1 | Galnc2 |

|    |           |          |        |         |         |         |        |        |        |        |         |         |         |        |        |
|----|-----------|----------|--------|---------|---------|---------|--------|--------|--------|--------|---------|---------|---------|--------|--------|
| 11 | YNL033W   | YPDcl2   | YPDcl3 | EtOHcl1 | EtOHcl2 | Galcl1  | YPDnc1 | YPDnc2 | -      | -      | EtOHnc1 | EtOHnc2 | Galnc1  | Galnc2 |        |
| 11 | YLL019W-A | -        | YPDcl3 | EtOHcl1 | -       | Galcl1  | YPDnc1 | YPDnc2 | YPDnc3 | YPDnc4 | EtOHnc1 | EtOHnc2 | Galnc1  | Galnc2 |        |
| 11 | ECM12     | YHR021W- | YPDcl2 | YPDcl3  | -       | EtOHcl2 | Galcl1 | YPDnc1 | YPDnc2 | YPDnc3 | -       | EtOHnc1 | EtOHnc2 | Galnc1 | Galnc2 |
| 11 | APN2      | YBL019W  | YPDcl2 | YPDcl3  | -       | EtOHcl2 | Galcl1 | YPDnc1 | YPDnc2 | YPDnc3 | YPDnc4  | EtOHnc1 | -       | Galnc1 | Galnc2 |
| 11 | YIL067C   | -        | -      | EtOHcl1 | EtOHcl2 | Galcl1  | YPDnc1 | YPDnc2 | YPDnc3 | YPDnc4 | EtOHnc1 | EtOHnc2 | Galnc1  | Galnc2 |        |
| 11 | YEF1      | YEL041W  | -      | YPDcl3  | EtOHcl1 | EtOHcl2 | Galcl1 | YPDnc1 | YPDnc2 | YPDnc3 | -       | EtOHnc1 | EtOHnc2 | Galnc1 | Galnc2 |
| 11 | SEC66     | YBR171W  | -      | YPDcl3  | EtOHcl1 | -       | Galcl1 | YPDnc1 | YPDnc2 | YPDnc3 | YPDnc4  | EtOHnc1 | EtOHnc2 | Galnc1 | Galnc2 |
| 11 | YLR317W   | YPDcl2   | YPDcl3 | EtOHcl1 | -       | Galcl1  | YPDnc1 | YPDnc2 | YPDnc3 | YPDnc4 | EtOHnc1 | -       | Galnc1  | Galnc2 |        |
| 11 | PRM7      | YDL039C  | YPDcl2 | -       | EtOHcl1 | -       | Galcl1 | YPDnc1 | YPDnc2 | YPDnc3 | YPDnc4  | EtOHnc1 | EtOHnc2 | Galnc1 | Galnc2 |
| 11 | AVO1      | YOL078W  | YPDcl2 | -       | EtOHcl1 | -       | Galcl1 | YPDnc1 | YPDnc2 | YPDnc3 | YPDnc4  | EtOHnc1 | EtOHnc2 | Galnc1 | Galnc2 |
| 11 | FUR4      | YBR021W  | YPDcl2 | YPDcl3  | EtOHcl1 | EtOHcl2 | Galcl1 | YPDnc1 | YPDnc2 | YPDnc3 | YPDnc4  | EtOHnc1 | -       | -      | Galnc2 |
| 11 | YHR007C-A | -        | YPDcl3 | EtOHcl1 | EtOHcl2 | Galcl1  | YPDnc1 | YPDnc2 | YPDnc3 | YPDnc4 | EtOHnc1 | EtOHnc2 | Galnc1  | -      |        |
| 11 | NOT5      | YPR072W  | -      | -       | EtOHcl1 | EtOHcl2 | Galcl1 | YPDnc1 | YPDnc2 | YPDnc3 | YPDnc4  | EtOHnc1 | EtOHnc2 | Galnc1 | Galnc2 |
| 11 | YFR012W-A | -        | YPDcl3 | EtOHcl1 | -       | Galcl1  | YPDnc1 | YPDnc2 | YPDnc3 | YPDnc4 | EtOHnc1 | EtOHnc2 | Galnc1  | Galnc2 |        |
| 11 | SHU1      | YHL006C  | YPDcl2 | YPDcl3  | EtOHcl1 | EtOHcl2 | Galcl1 | YPDnc1 | YPDnc2 | YPDnc3 | -       | EtOHnc1 | -       | Galnc1 | Galnc2 |
| 11 | HUA1      | YGR268C  | YPDcl2 | YPDcl3  | -       | -       | Galcl1 | YPDnc1 | YPDnc2 | YPDnc3 | YPDnc4  | EtOHnc1 | EtOHnc2 | Galnc1 | Galnc2 |
| 11 | STR2      | YJR130C  | YPDcl2 | YPDcl3  | -       | EtOHcl2 | Galcl1 | YPDnc1 | YPDnc2 | YPDnc3 | YPDnc4  | EtOHnc1 | -       | Galnc1 | Galnc2 |
| 11 | ELM1      | YKL048C  | YPDcl2 | YPDcl3  | EtOHcl1 | EtOHcl2 | Galcl1 | YPDnc1 | YPDnc2 | YPDnc3 | YPDnc4  | EtOHnc1 | EtOHnc2 | -      | -      |
| 11 | SYM1      | YLR251W  | YPDcl2 | YPDcl3  | EtOHcl1 | EtOHcl2 | Galcl1 | -      | YPDnc2 | -      | YPDnc4  | EtOHnc1 | EtOHnc2 | Galnc1 | Galnc2 |
| 11 | VMA22     | YHR060W  | YPDcl2 | -       | EtOHcl1 | -       | Galcl1 | YPDnc1 | YPDnc2 | YPDnc3 | YPDnc4  | EtOHnc1 | EtOHnc2 | Galnc1 | Galnc2 |
| 11 | MUK1      | YPL070W  | YPDcl2 | YPDcl3  | EtOHcl1 | EtOHcl2 | Galcl1 | YPDnc1 | YPDnc2 | YPDnc3 | YPDnc4  | -       | EtOHnc2 | -      | Galnc2 |
| 11 | CIS3      | YJL158C  | -      | YPDcl3  | EtOHcl1 | -       | Galcl1 | YPDnc1 | YPDnc2 | YPDnc3 | YPDnc4  | EtOHnc1 | EtOHnc2 | Galnc1 | Galnc2 |
| 11 | MRP1      | YDR347W  | YPDcl2 | YPDcl3  | -       | -       | Galcl1 | YPDnc1 | YPDnc2 | YPDnc3 | YPDnc4  | EtOHnc1 | EtOHnc2 | Galnc1 | Galnc2 |
| 11 | SER2      | YGR208W  | YPDcl2 | -       | EtOHcl1 | EtOHcl2 | -      | YPDnc1 | YPDnc2 | YPDnc3 | YPDnc4  | EtOHnc1 | EtOHnc2 | Galnc1 | Galnc2 |
| 11 | GUS1      | YGL245W  | YPDcl2 | -       | EtOHcl1 | EtOHcl2 | Galcl1 | YPDnc1 | YPDnc2 | YPDnc3 | YPDnc4  | EtOHnc1 | -       | Galnc1 | Galnc2 |
| 11 | YTA7      | YGR270W  | YPDcl2 | YPDcl3  | EtOHcl1 | EtOHcl2 | Galcl1 | YPDnc1 | YPDnc2 | YPDnc3 | YPDnc4  | -       | EtOHnc2 | Galnc1 | -      |
| 11 | MRPL37    | YBR268W  | YPDcl2 | YPDcl3  | EtOHcl1 | EtOHcl2 | Galcl1 | YPDnc1 | -      | -      | YPDnc4  | EtOHnc1 | EtOHnc2 | Galnc1 | Galnc2 |
| 11 | YJR112W-A | -        | YPDcl3 | EtOHcl1 | EtOHcl2 | Galcl1  | YPDnc1 | YPDnc2 | YPDnc3 | -      | EtOHnc1 | EtOHnc2 | Galnc1  | Galnc2 |        |
| 11 | GAT1      | YFL021W  | YPDcl2 | YPDcl3  | -       | EtOHcl2 | Galcl1 | YPDnc1 | YPDnc2 | YPDnc3 | YPDnc4  | EtOHnc1 | EtOHnc2 | Galnc1 | -      |
| 11 | YBL039C-A | YPDcl2   | -      | EtOHcl1 | EtOHcl2 | Galcl1  | YPDnc1 | -      | YPDnc3 | YPDnc4 | EtOHnc1 | EtOHnc2 | Galnc1  | Galnc2 |        |
| 11 | MRPL31    | YKL138C  | YPDcl2 | YPDcl3  | EtOHcl1 | EtOHcl2 | Galcl1 | -      | YPDnc2 | YPDnc3 | YPDnc4  | EtOHnc1 | EtOHnc2 | -      | Galnc2 |
| 11 | ELA1      | YNL230C  | YPDcl2 | YPDcl3  | EtOHcl1 | EtOHcl2 | Galcl1 | YPDnc1 | YPDnc2 | -      | YPDnc4  | EtOHnc1 | EtOHnc2 | Galnc1 | -      |
| 11 | YPL088W   | YPDcl2   | YPDcl3 | EtOHcl1 | -       | Galcl1  | YPDnc1 | YPDnc2 | YPDnc3 | YPDnc4 | EtOHnc1 | -       | Galnc1  | Galnc2 |        |
| 11 | LIA1      | YJR070C  | YPDcl2 | -       | EtOHcl1 | -       | Galcl1 | YPDnc1 | YPDnc2 | YPDnc3 | YPDnc4  | EtOHnc1 | EtOHnc2 | Galnc1 | Galnc2 |

|    |       |         |        |        |         |         |        |        |        |        |        |         |         |        |        |
|----|-------|---------|--------|--------|---------|---------|--------|--------|--------|--------|--------|---------|---------|--------|--------|
| 11 | CYS4  | YGR155W | -      | YPDcl3 | EtOHcl1 | EtOHcl2 | Galcl1 | YPDnc1 | -      | YPDnc3 | YPDnc4 | EtOHnc1 | EtOHnc2 | Galnc1 | Galnc2 |
| 11 | BDP1  | YNL039W | YPDcl2 | YPDcl3 | EtOHcl1 | EtOHcl2 | Galcl1 | -      | YPDnc2 | YPDnc3 | YPDnc4 | EtOHnc1 | -       | Galnc1 | Galnc2 |
| 11 |       | YHL034W | -      | -      | EtOHcl1 | EtOHcl2 | Galcl1 | YPDnc1 | YPDnc2 | YPDnc3 | YPDnc4 | EtOHnc1 | EtOHnc2 | Galnc1 | Galnc2 |
| 11 |       | YLR243W | -      | -      | EtOHcl1 | EtOHcl2 | Galcl1 | YPDnc1 | YPDnc2 | YPDnc3 | YPDnc4 | EtOHnc1 | EtOHnc2 | Galnc1 | Galnc2 |
| 11 | HAM1  | YJR069C | -      | -      | EtOHcl1 | EtOHcl2 | Galcl1 | YPDnc1 | YPDnc2 | YPDnc3 | YPDnc4 | EtOHnc1 | EtOHnc2 | Galnc1 | Galnc2 |
| 11 | RNR3  | YIL066C | -      | -      | EtOHcl1 | EtOHcl2 | Galcl1 | YPDnc1 | YPDnc2 | YPDnc3 | YPDnc4 | EtOHnc1 | EtOHnc2 | Galnc1 | Galnc2 |
| 11 | CTR86 | YCR054C | YPDcl2 | -      | EtOHcl1 | -       | Galcl1 | YPDnc1 | YPDnc2 | YPDnc3 | YPDnc4 | EtOHnc1 | EtOHnc2 | Galnc1 | Galnc2 |
| 11 | TAD1  | YGL243W | YPDcl2 | YPDcl3 | EtOHcl1 | -       | Galcl1 | YPDnc1 | YPDnc2 | YPDnc3 | YPDnc4 | EtOHnc1 | -       | Galnc1 | Galnc2 |
| 11 | SEC39 | YLR440C | YPDcl2 | YPDcl3 | -       | EtOHcl2 | Galcl1 | YPDnc1 | YPDnc2 | YPDnc3 | YPDnc4 | -       | EtOHnc2 | Galnc1 | Galnc2 |
| 11 | SIZ1  | YDR409W | -      | YPDcl3 | EtOHcl1 | -       | Galcl1 | YPDnc1 | YPDnc2 | YPDnc3 | YPDnc4 | EtOHnc1 | EtOHnc2 | Galnc1 | Galnc2 |
| 11 |       | YKL118W | YPDcl2 | YPDcl3 | EtOHcl1 | EtOHcl2 | Galcl1 | YPDnc1 | -      | -      | YPDnc4 | EtOHnc1 | EtOHnc2 | Galnc1 | Galnc2 |
| 11 | CDC48 | YDL126C | -      | YPDcl3 | EtOHcl1 | EtOHcl2 | Galcl1 | YPDnc1 | YPDnc2 | YPDnc3 | YPDnc4 | EtOHnc1 | -       | Galnc1 | Galnc2 |
| 11 | UBX6  | YJL048C | -      | YPDcl3 | EtOHcl1 | -       | Galcl1 | YPDnc1 | YPDnc2 | YPDnc3 | YPDnc4 | EtOHnc1 | EtOHnc2 | Galnc1 | Galnc2 |
| 11 | MED8  | YBR193C | YPDcl2 | -      | EtOHcl1 | -       | Galcl1 | YPDnc1 | YPDnc2 | YPDnc3 | YPDnc4 | EtOHnc1 | EtOHnc2 | Galnc1 | Galnc2 |
| 11 | NSL1  | YPL233W | -      | YPDcl3 | EtOHcl1 | -       | Galcl1 | YPDnc1 | YPDnc2 | YPDnc3 | YPDnc4 | EtOHnc1 | EtOHnc2 | Galnc1 | Galnc2 |
| 11 |       | YPR015C | YPDcl2 | YPDcl3 | EtOHcl1 | EtOHcl2 | Galcl1 | YPDnc1 | -      | YPDnc3 | -      | EtOHnc1 | EtOHnc2 | Galnc1 | Galnc2 |
| 11 | MBF1  | YOR298C | YPDcl2 | YPDcl3 | EtOHcl1 | EtOHcl2 | Galcl1 | YPDnc1 | -      | YPDnc3 | -      | EtOHnc1 | EtOHnc2 | Galnc1 | Galnc2 |
| 11 | COX18 | YGR062C | -      | -      | EtOHcl1 | EtOHcl2 | Galcl1 | YPDnc1 | YPDnc2 | YPDnc3 | YPDnc4 | EtOHnc1 | EtOHnc2 | Galnc1 | Galnc2 |
| 11 | IRC9  | YJL142C | YPDcl2 | YPDcl3 | -       | EtOHcl2 | Galcl1 | YPDnc1 | YPDnc2 | -      | YPDnc4 | EtOHnc1 | EtOHnc2 | Galnc1 | Galnc2 |
| 11 | GDS1  | YOR355W | -      | YPDcl3 | EtOHcl1 | EtOHcl2 | -      | YPDnc1 | YPDnc2 | YPDnc3 | YPDnc4 | EtOHnc1 | EtOHnc2 | Galnc1 | Galnc2 |
| 11 |       | YNL013C | YPDcl2 | YPDcl3 | EtOHcl1 | EtOHcl2 | Galcl1 | YPDnc1 | YPDnc2 | YPDnc3 | YPDnc4 | -       | -       | Galnc1 | Galnc2 |
| 11 | VCX1  | YDL128W | -      | YPDcl3 | EtOHcl1 | EtOHcl2 | -      | YPDnc1 | YPDnc2 | YPDnc3 | YPDnc4 | EtOHnc1 | EtOHnc2 | Galnc1 | Galnc2 |
| 11 |       | YBR056C | YPDcl2 | -      | EtOHcl1 | EtOHcl2 | Galcl1 | YPDnc1 | YPDnc2 | YPDnc3 | YPDnc4 | EtOHnc1 | EtOHnc2 | -      | Galnc2 |
| 11 |       | YOR262W | -      | -      | EtOHcl1 | EtOHcl2 | Galcl1 | YPDnc1 | YPDnc2 | YPDnc3 | YPDnc4 | EtOHnc1 | EtOHnc2 | Galnc1 | Galnc2 |
| 11 | MRP10 | YDL045W | YPDcl2 | YPDcl3 | EtOHcl1 | -       | Galcl1 | YPDnc1 | YPDnc2 | YPDnc3 | YPDnc4 | -       | EtOHnc2 | Galnc1 | Galnc2 |
| 11 |       | YLL059C | YPDcl2 | YPDcl3 | EtOHcl1 | EtOHcl2 | Galcl1 | YPDnc1 | YPDnc2 | YPDnc3 | -      | EtOHnc1 | -       | Galnc1 | Galnc2 |
| 11 | RPI1  | YIL119C | YPDcl2 | YPDcl3 | EtOHcl1 | -       | Galcl1 | YPDnc1 | YPDnc2 | YPDnc3 | -      | EtOHnc1 | EtOHnc2 | Galnc1 | Galnc2 |
| 11 |       | YMR290W | -      | YPDcl3 | EtOHcl1 | -       | Galcl1 | YPDnc1 | YPDnc2 | YPDnc3 | YPDnc4 | EtOHnc1 | EtOHnc2 | Galnc1 | Galnc2 |
| 11 | GAS2  | YLR343W | YPDcl2 | YPDcl3 | -       | EtOHcl2 | Galcl1 | YPDnc1 | YPDnc2 | YPDnc3 | YPDnc4 | EtOHnc1 | EtOHnc2 | Galnc1 | -      |
| 11 | SRX1  | YKL086W | YPDcl2 | YPDcl3 | EtOHcl1 | -       | -      | YPDnc1 | YPDnc2 | YPDnc3 | YPDnc4 | EtOHnc1 | EtOHnc2 | Galnc1 | Galnc2 |
| 11 |       | YGL010W | YPDcl2 | YPDcl3 | EtOHcl1 | EtOHcl2 | Galcl1 | YPDnc1 | -      | YPDnc3 | -      | EtOHnc1 | EtOHnc2 | Galnc1 | Galnc2 |
| 11 | RPB2  | YOR151C | YPDcl2 | YPDcl3 | EtOHcl1 | EtOHcl2 | Galcl1 | YPDnc1 | YPDnc2 | YPDnc3 | -      | EtOHnc1 | -       | Galnc1 | Galnc2 |
| 11 | YPS3  | YLR121C | YPDcl2 | YPDcl3 | EtOHcl1 | -       | Galcl1 | YPDnc1 | YPDnc2 | YPDnc3 | -      | EtOHnc1 | EtOHnc2 | Galnc1 | Galnc2 |
| 11 | DOS2  | YDR068W | YPDcl2 | YPDcl3 | EtOHcl1 | -       | Galcl1 | YPDnc1 | YPDnc2 | YPDnc3 | YPDnc4 | EtOHnc1 | -       | Galnc1 | Galnc2 |

|    |        |           |        |        |         |         |        |        |        |        |        |         |         |        |        |
|----|--------|-----------|--------|--------|---------|---------|--------|--------|--------|--------|--------|---------|---------|--------|--------|
| 11 | ARP10  | YDR106W   | -      | -      | EtOHcl1 | EtOHcl2 | Galcl1 | YPDnc1 | YPDnc2 | YPDnc3 | YPDnc4 | EtOHnc1 | EtOHnc2 | Galnc1 | Galnc2 |
| 11 | REH1   | YLR387C   | YPDcl2 | YPDcl3 | EtOHcl1 | EtOHcl2 | Galcl1 | YPDnc1 | -      | YPDnc3 | YPDnc4 | EtOHnc1 | EtOHnc2 | Galnc1 | -      |
| 11 | SPC29  | YPL124W   | YPDcl2 | YPDcl3 | -       | -       | Galcl1 | YPDnc1 | YPDnc2 | YPDnc3 | YPDnc4 | EtOHnc1 | EtOHnc2 | Galnc1 | Galnc2 |
| 11 |        | YER152C   | YPDcl2 | -      | EtOHcl1 | -       | Galcl1 | YPDnc1 | YPDnc2 | YPDnc3 | YPDnc4 | EtOHnc1 | EtOHnc2 | Galnc1 | Galnc2 |
| 11 | WSC3   | YOL105C   | YPDcl2 | -      | -       | EtOHcl2 | Galcl1 | YPDnc1 | YPDnc2 | YPDnc3 | YPDnc4 | EtOHnc1 | EtOHnc2 | Galnc1 | Galnc2 |
| 11 |        | YLR334C   | -      | YPDcl3 | EtOHcl1 | EtOHcl2 | Galcl1 | YPDnc1 | YPDnc2 | YPDnc3 | -      | EtOHnc1 | EtOHnc2 | Galnc1 | Galnc2 |
| 11 | RLP24  | YLR009W   | YPDcl2 | -      | EtOHcl1 | EtOHcl2 | Galcl1 | YPDnc1 | YPDnc2 | YPDnc3 | YPDnc4 | -       | EtOHnc2 | Galnc1 | Galnc2 |
| 11 | OST3   | YOR085W   | YPDcl2 | -      | -       | EtOHcl2 | Galcl1 | YPDnc1 | YPDnc2 | YPDnc3 | YPDnc4 | EtOHnc1 | EtOHnc2 | Galnc1 | Galnc2 |
| 11 | NST1   | YNL091W   | -      | YPDcl3 | EtOHcl1 | EtOHcl2 | Galcl1 | YPDnc1 | YPDnc2 | YPDnc3 | YPDnc4 | EtOHnc1 | EtOHnc2 | -      | Galnc2 |
| 11 | TAT2   | YOL020W   | -      | YPDcl3 | EtOHcl1 | EtOHcl2 | Galcl1 | YPDnc1 | YPDnc2 | YPDnc3 | -      | EtOHnc1 | EtOHnc2 | Galnc1 | Galnc2 |
| 11 | ECM8   | YBR076W   | YPDcl2 | YPDcl3 | EtOHcl1 | -       | -      | YPDnc1 | YPDnc2 | YPDnc3 | YPDnc4 | EtOHnc1 | EtOHnc2 | Galnc1 | Galnc2 |
| 11 | THG1   | YGR024C   | -      | YPDcl3 | EtOHcl1 | -       | Galcl1 | YPDnc1 | YPDnc2 | YPDnc3 | YPDnc4 | EtOHnc1 | EtOHnc2 | Galnc1 | Galnc2 |
| 11 | RAV1   | YJR033C   | YPDcl2 | YPDcl3 | EtOHcl1 | EtOHcl2 | Galcl1 | YPDnc1 | YPDnc2 | YPDnc3 | YPDnc4 | EtOHnc1 | EtOHnc2 | -      | -      |
| 11 |        | YMR253C   | YPDcl2 | YPDcl3 | EtOHcl1 | -       | Galcl1 | YPDnc1 | YPDnc2 | YPDnc3 | YPDnc4 | EtOHnc1 | -       | Galnc1 | Galnc2 |
| 11 | REV1   | YOR346W   | YPDcl2 | YPDcl3 | -       | EtOHcl2 | Galcl1 | YPDnc1 | YPDnc2 | YPDnc3 | YPDnc4 | EtOHnc1 | -       | Galnc1 | Galnc2 |
| 11 | SRL3   | YKR091W   | YPDcl2 | YPDcl3 | EtOHcl1 | EtOHcl2 | Galcl1 | YPDnc1 | YPDnc2 | YPDnc3 | YPDnc4 | -       | -       | Galnc1 | Galnc2 |
| 11 | RIC1   | YLR039C   | YPDcl2 | -      | EtOHcl1 | -       | Galcl1 | YPDnc1 | YPDnc2 | YPDnc3 | YPDnc4 | EtOHnc1 | EtOHnc2 | Galnc1 | Galnc2 |
| 11 | GUT1   | YHL032C   | YPDcl2 | YPDcl3 | EtOHcl1 | -       | -      | YPDnc1 | YPDnc2 | YPDnc3 | YPDnc4 | EtOHnc1 | EtOHnc2 | Galnc1 | Galnc2 |
| 11 | HEM14  | YER014W   | YPDcl2 | YPDcl3 | EtOHcl1 | EtOHcl2 | Galcl1 | -      | -      | YPDnc3 | YPDnc4 | EtOHnc1 | EtOHnc2 | Galnc1 | Galnc2 |
| 11 | PRY1   | YJL079C   | -      | YPDcl3 | EtOHcl1 | EtOHcl2 | -      | YPDnc1 | YPDnc2 | YPDnc3 | YPDnc4 | EtOHnc1 | EtOHnc2 | Galnc1 | Galnc2 |
| 11 | PRB1   | YEL060C   | -      | YPDcl3 | EtOHcl1 | -       | Galcl1 | YPDnc1 | YPDnc2 | YPDnc3 | YPDnc4 | EtOHnc1 | EtOHnc2 | Galnc1 | Galnc2 |
| 11 | RPL26A | YLR344W   | YPDcl2 | YPDcl3 | -       | EtOHcl2 | Galcl1 | YPDnc1 | YPDnc2 | YPDnc3 | YPDnc4 | EtOHnc1 | -       | Galnc1 | Galnc2 |
| 11 | ARL3   | YPL051W   | YPDcl2 | -      | EtOHcl1 | EtOHcl2 | Galcl1 | YPDnc1 | YPDnc2 | -      | YPDnc4 | EtOHnc1 | EtOHnc2 | Galnc1 | Galnc2 |
| 11 | YBT1   | YLL048C   | YPDcl2 | YPDcl3 | -       | EtOHcl2 | Galcl1 | YPDnc1 | YPDnc2 | YPDnc3 | -      | EtOHnc1 | EtOHnc2 | Galnc1 | Galnc2 |
| 11 | PPG1   | YNR032W   | YPDcl2 | YPDcl3 | -       | EtOHcl2 | Galcl1 | YPDnc1 | YPDnc2 | -      | YPDnc4 | EtOHnc1 | EtOHnc2 | Galnc1 | Galnc2 |
| 11 | SPS4   | YOR313C   | YPDcl2 | -      | EtOHcl1 | -       | Galcl1 | YPDnc1 | YPDnc2 | YPDnc3 | YPDnc4 | EtOHnc1 | EtOHnc2 | Galnc1 | Galnc2 |
| 11 | NUF2   | YOL069W   | -      | YPDcl3 | EtOHcl1 | EtOHcl2 | -      | YPDnc1 | YPDnc2 | YPDnc3 | YPDnc4 | EtOHnc1 | EtOHnc2 | Galnc1 | Galnc2 |
| 11 | CYB5   | YNL111C   | YPDcl2 | YPDcl3 | EtOHcl1 | EtOHcl2 | Galcl1 | YPDnc1 | YPDnc2 | YPDnc3 | YPDnc4 | EtOHnc1 | EtOHnc2 | -      | -      |
| 11 |        | YOR008W   | -      | YPDcl3 | EtOHcl1 | -       | Galcl1 | YPDnc1 | YPDnc2 | YPDnc3 | YPDnc4 | EtOHnc1 | EtOHnc2 | Galnc1 | Galnc2 |
| 11 |        | YDR415C   | YPDcl2 | -      | EtOHcl1 | -       | Galcl1 | YPDnc1 | YPDnc2 | YPDnc3 | YPDnc4 | EtOHnc1 | EtOHnc2 | Galnc1 | Galnc2 |
| 11 | SED1   | YDR077W   | YPDcl2 | YPDcl3 | EtOHcl1 | EtOHcl2 | Galcl1 | -      | YPDnc2 | YPDnc3 | YPDnc4 | EtOHnc1 | EtOHnc2 | Galnc1 | -      |
| 11 | TDA10  | YGR205W   | YPDcl2 | YPDcl3 | EtOHcl1 | EtOHcl2 | Galcl1 | -      | YPDnc2 | YPDnc3 | YPDnc4 | -       | EtOHnc2 | Galnc1 | Galnc2 |
| 11 |        | YOR186C-A | YPDcl2 | YPDcl3 | -       | -       | Galcl1 | YPDnc1 | YPDnc2 | YPDnc3 | YPDnc4 | EtOHnc1 | EtOHnc2 | Galnc1 | Galnc2 |
| 11 | COX7   | YMR256C   | YPDcl2 | YPDcl3 | EtOHcl1 | -       | Galcl1 | YPDnc1 | YPDnc2 | YPDnc3 | YPDnc4 | -       | EtOHnc2 | Galnc1 | Galnc2 |

|    |        |          |        |        |         |         |        |        |        |        |        |         |         |        |        |
|----|--------|----------|--------|--------|---------|---------|--------|--------|--------|--------|--------|---------|---------|--------|--------|
| 11 | NPY1   | YGL067W  | YPDcl2 | YPDcl3 | EtOHcl1 | EtOHcl2 | Galcl1 | -      | YPDnc2 | YPDnc3 | YPDnc4 | EtOHnc1 | EtOHnc2 | -      | Galnc2 |
| 11 | NCS2   | YNL119W  | YPDcl2 | YPDcl3 | EtOHcl1 | EtOHcl2 | Galcl1 | YPDnc1 | YPDnc2 | YPDnc3 | YPDnc4 | EtOHnc1 | EtOHnc2 | -      | -      |
| 11 | YML6   | YML025C  | YPDcl2 | YPDcl3 | EtOHcl1 | -       | Galcl1 | -      | YPDnc2 | YPDnc3 | YPDnc4 | EtOHnc1 | EtOHnc2 | Galnc1 | Galnc2 |
| 11 | MTC1   | YJL123C  | -      | -      | EtOHcl1 | EtOHcl2 | Galcl1 | YPDnc1 | YPDnc2 | YPDnc3 | YPDnc4 | EtOHnc1 | EtOHnc2 | Galnc1 | Galnc2 |
| 11 |        | YPR027C  | YPDcl2 | YPDcl3 | EtOHcl1 | EtOHcl2 | Galcl1 | YPDnc1 | YPDnc2 | -      | -      | EtOHnc1 | EtOHnc2 | Galnc1 | Galnc2 |
| 11 | NAM7   | YMR080C  | YPDcl2 | YPDcl3 | EtOHcl1 | EtOHcl2 | Galcl1 | YPDnc1 | YPDnc2 | -      | YPDnc4 | EtOHnc1 | -       | Galnc1 | Galnc2 |
| 11 | HRT3   | YLR097C  | -      | -      | EtOHcl1 | EtOHcl2 | Galcl1 | YPDnc1 | YPDnc2 | YPDnc3 | YPDnc4 | EtOHnc1 | EtOHnc2 | Galnc1 | Galnc2 |
| 11 | SPT3   | YDR392W  | YPDcl2 | -      | EtOHcl1 | -       | Galcl1 | YPDnc1 | YPDnc2 | YPDnc3 | YPDnc4 | EtOHnc1 | EtOHnc2 | Galnc1 | Galnc2 |
| 11 |        | YGR176W  | -      | -      | EtOHcl1 | EtOHcl2 | Galcl1 | YPDnc1 | YPDnc2 | YPDnc3 | YPDnc4 | EtOHnc1 | EtOHnc2 | Galnc1 | Galnc2 |
| 11 |        | YJR146W  | -      | YPDcl3 | EtOHcl1 | EtOHcl2 | -      | YPDnc1 | YPDnc2 | YPDnc3 | YPDnc4 | EtOHnc1 | EtOHnc2 | Galnc1 | Galnc2 |
| 11 | SER33  | YIL074C  | YPDcl2 | -      | EtOHcl1 | -       | Galcl1 | YPDnc1 | YPDnc2 | YPDnc3 | YPDnc4 | EtOHnc1 | EtOHnc2 | Galnc1 | Galnc2 |
| 11 | GPI14  | YJR013W  | -      | -      | EtOHcl1 | EtOHcl2 | Galcl1 | YPDnc1 | YPDnc2 | YPDnc3 | YPDnc4 | EtOHnc1 | EtOHnc2 | Galnc1 | Galnc2 |
| 11 | FBP1   | YLR377C  | -      | YPDcl3 | EtOHcl1 | EtOHcl2 | Galcl1 | YPDnc1 | YPDnc2 | YPDnc3 | YPDnc4 | EtOHnc1 | -       | Galnc1 | Galnc2 |
| 11 | ANB1   | YJR047C  | YPDcl2 | YPDcl3 | EtOHcl1 | -       | -      | YPDnc1 | YPDnc2 | YPDnc3 | YPDnc4 | EtOHnc1 | EtOHnc2 | Galnc1 | Galnc2 |
| 11 |        | YPR126C  | YPDcl2 | YPDcl3 | EtOHcl1 | -       | Galcl1 | YPDnc1 | -      | YPDnc3 | YPDnc4 | EtOHnc1 | EtOHnc2 | Galnc1 | Galnc2 |
| 11 | NCE101 | YJL205C  | YPDcl2 | YPDcl3 | EtOHcl1 | EtOHcl2 | Galcl1 | YPDnc1 | YPDnc2 | -      | YPDnc4 | EtOHnc1 | -       | Galnc1 | Galnc2 |
| 11 | TPS1   | YBR126C  | YPDcl2 | YPDcl3 | EtOHcl1 | EtOHcl2 | Galcl1 | YPDnc1 | YPDnc2 | YPDnc3 | YPDnc4 | -       | EtOHnc2 | -      | Galnc2 |
| 11 | ARP4   | YJL081C  | -      | YPDcl3 | EtOHcl1 | EtOHcl2 | Galcl1 | YPDnc1 | -      | YPDnc3 | YPDnc4 | EtOHnc1 | EtOHnc2 | Galnc1 | Galnc2 |
| 11 | CDC53  | YDL132W  | YPDcl2 | YPDcl3 | EtOHcl1 | EtOHcl2 | Galcl1 | -      | YPDnc2 | YPDnc3 | YPDnc4 | -       | EtOHnc2 | Galnc1 | Galnc2 |
| 11 | GAS4   | YOL132W  | YPDcl2 | YPDcl3 | -       | EtOHcl2 | Galcl1 | YPDnc1 | YPDnc2 | YPDnc3 | YPDnc4 | EtOHnc1 | -       | Galnc1 | Galnc2 |
| 11 | DAS2   | YDR020C  | YPDcl2 | YPDcl3 | EtOHcl1 | -       | Galcl1 | YPDnc1 | YPDnc2 | YPDnc3 | -      | EtOHnc1 | EtOHnc2 | Galnc1 | Galnc2 |
| 11 | RSM28  | YDR494W  | YPDcl2 | YPDcl3 | EtOHcl1 | -       | Galcl1 | -      | YPDnc2 | YPDnc3 | YPDnc4 | EtOHnc1 | EtOHnc2 | Galnc1 | Galnc2 |
| 11 | DBP5   | YOR046C  | YPDcl2 | -      | EtOHcl1 | EtOHcl2 | Galcl1 | YPDnc1 | YPDnc2 | -      | YPDnc4 | EtOHnc1 | EtOHnc2 | Galnc1 | Galnc2 |
| 11 |        | YGR067C  | -      | YPDcl3 | EtOHcl1 | EtOHcl2 | Galcl1 | YPDnc1 | YPDnc2 | YPDnc3 | -      | EtOHnc1 | EtOHnc2 | Galnc1 | Galnc2 |
| 11 |        | YBL012C  | -      | YPDcl3 | EtOHcl1 | EtOHcl2 | Galcl1 | YPDnc1 | YPDnc2 | YPDnc3 | -      | EtOHnc1 | EtOHnc2 | Galnc1 | Galnc2 |
| 11 |        | YJL160C  | YPDcl2 | YPDcl3 | EtOHcl1 | EtOHcl2 | -      | YPDnc1 | YPDnc2 | -      | YPDnc4 | EtOHnc1 | EtOHnc2 | Galnc1 | Galnc2 |
| 11 | TSR3   | YOR006C  | YPDcl2 | YPDcl3 | EtOHcl1 | -       | Galcl1 | YPDnc1 | YPDnc2 | YPDnc3 | YPDnc4 | EtOHnc1 | -       | Galnc1 | Galnc2 |
| 11 | RCL1   | YOL010W  | YPDcl2 | YPDcl3 | EtOHcl1 | EtOHcl2 | Galcl1 | -      | YPDnc2 | YPDnc3 | YPDnc4 | -       | EtOHnc2 | Galnc1 | Galnc2 |
| 11 | AIM29  | YKR074W  | -      | -      | EtOHcl1 | EtOHcl2 | Galcl1 | YPDnc1 | YPDnc2 | YPDnc3 | YPDnc4 | EtOHnc1 | EtOHnc2 | Galnc1 | Galnc2 |
| 11 | KIC1   | YHR102W  | -      | YPDcl3 | EtOHcl1 | EtOHcl2 | Galcl1 | YPDnc1 | -      | YPDnc3 | YPDnc4 | EtOHnc1 | EtOHnc2 | Galnc1 | Galnc2 |
| 11 | TAZ1   | YPR140W  | -      | YPDcl3 | -       | EtOHcl2 | Galcl1 | YPDnc1 | YPDnc2 | YPDnc3 | YPDnc4 | EtOHnc1 | EtOHnc2 | Galnc1 | Galnc2 |
| 11 | EMC6   | YLL014W  | YPDcl2 | -      | EtOHcl1 | -       | Galcl1 | YPDnc1 | YPDnc2 | YPDnc3 | YPDnc4 | EtOHnc1 | EtOHnc2 | Galnc1 | Galnc2 |
| 11 | YTM1   | YOR272W  | -      | YPDcl3 | EtOHcl1 | EtOHcl2 | Galcl1 | YPDnc1 | YPDnc2 | YPDnc3 | YPDnc4 | EtOHnc1 | -       | Galnc1 | Galnc2 |
| 11 |        | YGL006W- | YPDcl2 | YPDcl3 | -       | EtOHcl2 | Galcl1 | YPDnc1 | YPDnc2 | YPDnc3 | -      | EtOHnc1 | EtOHnc2 | Galnc1 | Galnc2 |

|    |           |         |        |         |         |         |        |        |        |        |         |         |         |        |        |
|----|-----------|---------|--------|---------|---------|---------|--------|--------|--------|--------|---------|---------|---------|--------|--------|
| 11 | YJR129C   | YPDcl2  | -      | EtOHcl1 | -       | Galcl1  | YPDnc1 | YPDnc2 | YPDnc3 | YPDnc4 | EtOHnc1 | EtOHnc2 | Galnc1  | Galnc2 |        |
| 11 | TVP15     | YDR100W | -      | -       | EtOHcl1 | EtOHcl2 | Galcl1 | YPDnc1 | YPDnc2 | YPDnc3 | YPDnc4  | EtOHnc1 | EtOHnc2 | Galnc1 | Galnc2 |
| 11 | SUP35     | YDR172W | YPDcl2 | YPDcl3  | EtOHcl1 | -       | Galcl1 | YPDnc1 | YPDnc2 | YPDnc3 | -       | EtOHnc1 | EtOHnc2 | Galnc1 | Galnc2 |
| 11 | AHT1      | YHR093W | -      | YPDcl3  | EtOHcl1 | EtOHcl2 | Galcl1 | YPDnc1 | YPDnc2 | YPDnc3 | YPDnc4  | EtOHnc1 | EtOHnc2 | Galnc1 | -      |
| 11 | MST27     | YGL051W | YPDcl2 | -       | EtOHcl1 | EtOHcl2 | Galcl1 | YPDnc1 | YPDnc2 | YPDnc3 | YPDnc4  | EtOHnc1 | -       | Galnc1 | Galnc2 |
| 11 | ATG29     | YPL166W | YPDcl2 | YPDcl3  | -       | -       | Galcl1 | YPDnc1 | YPDnc2 | YPDnc3 | YPDnc4  | EtOHnc1 | EtOHnc2 | Galnc1 | Galnc2 |
| 11 | CHS6      | YJL099W | -      | YPDcl3  | EtOHcl1 | EtOHcl2 | -      | YPDnc1 | YPDnc2 | YPDnc3 | YPDnc4  | EtOHnc1 | EtOHnc2 | Galnc1 | Galnc2 |
| 11 | PRE2      | YPR103W | YPDcl2 | YPDcl3  | -       | EtOHcl2 | Galcl1 | YPDnc1 | YPDnc2 | YPDnc3 | -       | EtOHnc1 | EtOHnc2 | Galnc1 | Galnc2 |
| 11 | IBA57     | YJR122W | YPDcl2 | YPDcl3  | EtOHcl1 | -       | Galcl1 | YPDnc1 | YPDnc2 | YPDnc3 | YPDnc4  | EtOHnc1 | EtOHnc2 | -      | Galnc2 |
| 11 | ROK1      | YGL171W | YPDcl2 | YPDcl3  | -       | -       | Galcl1 | YPDnc1 | YPDnc2 | YPDnc3 | YPDnc4  | EtOHnc1 | EtOHnc2 | Galnc1 | Galnc2 |
| 11 | NUD1      | YOR373W | YPDcl2 | YPDcl3  | EtOHcl1 | -       | -      | YPDnc1 | YPDnc2 | YPDnc3 | YPDnc4  | EtOHnc1 | EtOHnc2 | Galnc1 | Galnc2 |
| 11 | YLR406C-A | -       | YPDcl3 | EtOHcl1 | EtOHcl2 | Galcl1  | YPDnc1 | YPDnc2 | YPDnc3 | -      | EtOHnc1 | EtOHnc2 | Galnc1  | Galnc2 |        |
| 11 | CTR2      | YHR175W | YPDcl2 | YPDcl3  | EtOHcl1 | -       | Galcl1 | YPDnc1 | YPDnc2 | YPDnc3 | YPDnc4  | EtOHnc1 | -       | Galnc1 | Galnc2 |
| 11 | RRT2      | YBR246W | YPDcl2 | YPDcl3  | EtOHcl1 | EtOHcl2 | Galcl1 | YPDnc1 | YPDnc2 | -      | -       | EtOHnc1 | EtOHnc2 | Galnc1 | Galnc2 |
| 11 | RPL17A    | YKL180W | YPDcl2 | YPDcl3  | EtOHcl1 | EtOHcl2 | Galcl1 | -      | YPDnc2 | YPDnc3 | YPDnc4  | -       | EtOHnc2 | Galnc1 | Galnc2 |
| 11 | UBP7      | YIL156W | -      | YPDcl3  | EtOHcl1 | EtOHcl2 | -      | YPDnc1 | YPDnc2 | YPDnc3 | YPDnc4  | EtOHnc1 | EtOHnc2 | Galnc1 | Galnc2 |
| 11 | TYR1      | YBR166C | YPDcl2 | YPDcl3  | EtOHcl1 | EtOHcl2 | Galcl1 | -      | YPDnc2 | YPDnc3 | YPDnc4  | -       | EtOHnc2 | Galnc1 | Galnc2 |
| 11 | YDR271C   | YPDcl2  | YPDcl3 | EtOHcl1 | -       | Galcl1  | YPDnc1 | YPDnc2 | YPDnc3 | YPDnc4 | EtOHnc1 | -       | Galnc1  | Galnc2 |        |
| 11 | YDR433W   | YPDcl2  | -      | EtOHcl1 | EtOHcl2 | Galcl1  | -      | YPDnc2 | YPDnc3 | YPDnc4 | EtOHnc1 | EtOHnc2 | Galnc1  | Galnc2 |        |
| 11 | LIN1      | YHR156C | YPDcl2 | YPDcl3  | EtOHcl1 | EtOHcl2 | Galcl1 | -      | YPDnc2 | YPDnc3 | YPDnc4  | -       | EtOHnc2 | Galnc1 | Galnc2 |
| 11 | YMR230W   | YPDcl2  | -      | EtOHcl1 | -       | Galcl1  | YPDnc1 | YPDnc2 | YPDnc3 | YPDnc4 | EtOHnc1 | EtOHnc2 | Galnc1  | Galnc2 |        |
| 11 | PTK2      | YJR059W | -      | YPDcl3  | EtOHcl1 | EtOHcl2 | -      | YPDnc1 | YPDnc2 | YPDnc3 | YPDnc4  | EtOHnc1 | EtOHnc2 | Galnc1 | Galnc2 |
| 11 | DBP2      | YNL112W | -      | YPDcl3  | EtOHcl1 | EtOHcl2 | Galcl1 | YPDnc1 | YPDnc2 | YPDnc3 | YPDnc4  | -       | EtOHnc2 | Galnc1 | Galnc2 |
| 11 | SMY2      | YBR172C | -      | YPDcl3  | EtOHcl1 | -       | Galcl1 | YPDnc1 | YPDnc2 | YPDnc3 | YPDnc4  | EtOHnc1 | EtOHnc2 | Galnc1 | Galnc2 |
| 11 | SCP160    | YJL080C | -      | YPDcl3  | EtOHcl1 | -       | Galcl1 | YPDnc1 | YPDnc2 | YPDnc3 | YPDnc4  | EtOHnc1 | EtOHnc2 | Galnc1 | Galnc2 |
| 11 | STE13     | YOR219C | YPDcl2 | YPDcl3  | EtOHcl1 | EtOHcl2 | Galcl1 | YPDnc1 | YPDnc2 | -      | YPDnc4  | EtOHnc1 | -       | Galnc1 | Galnc2 |
| 11 | RAD61     | YDR014W | YPDcl2 | -       | EtOHcl1 | -       | Galcl1 | YPDnc1 | YPDnc2 | YPDnc3 | YPDnc4  | EtOHnc1 | EtOHnc2 | Galnc1 | Galnc2 |
| 11 | NBP1      | YLR457C | YPDcl2 | -       | EtOHcl1 | -       | Galcl1 | YPDnc1 | YPDnc2 | YPDnc3 | YPDnc4  | EtOHnc1 | EtOHnc2 | Galnc1 | Galnc2 |
| 11 | GIT1      | YCR098C | YPDcl2 | -       | EtOHcl1 | -       | Galcl1 | YPDnc1 | YPDnc2 | YPDnc3 | YPDnc4  | EtOHnc1 | EtOHnc2 | Galnc1 | Galnc2 |
| 11 | PHO8      | YDR481C | YPDcl2 | YPDcl3  | -       | EtOHcl2 | Galcl1 | YPDnc1 | YPDnc2 | YPDnc3 | -       | EtOHnc1 | EtOHnc2 | Galnc1 | Galnc2 |
| 11 | YNL150W   | -       | YPDcl3 | EtOHcl1 | EtOHcl2 | Galcl1  | YPDnc1 | YPDnc2 | -      | YPDnc4 | EtOHnc1 | EtOHnc2 | Galnc1  | Galnc2 |        |
| 11 | BUD8      | YLR353W | -      | -       | EtOHcl1 | EtOHcl2 | Galcl1 | YPDnc1 | YPDnc2 | YPDnc3 | YPDnc4  | EtOHnc1 | EtOHnc2 | Galnc1 | Galnc2 |
| 11 | BAT1      | YHR208W | YPDcl2 | YPDcl3  | EtOHcl1 | -       | Galcl1 | YPDnc1 | YPDnc2 | YPDnc3 | -       | EtOHnc1 | EtOHnc2 | Galnc1 | Galnc2 |
| 11 | PRE7      | YBL041W | -      | YPDcl3  | EtOHcl1 | EtOHcl2 | Galcl1 | -      | YPDnc2 | YPDnc3 | YPDnc4  | EtOHnc1 | EtOHnc2 | Galnc1 | Galnc2 |

|    |        |           |        |        |         |         |        |        |        |        |        |         |         |        |        |
|----|--------|-----------|--------|--------|---------|---------|--------|--------|--------|--------|--------|---------|---------|--------|--------|
| 11 | TOM7   | YNL070W   | YPDcl2 | -      | EtOHcl1 | EtOHcl2 | Galcl1 | YPDnc1 | YPDnc2 | -      | YPDnc4 | EtOHnc1 | EtOHnc2 | Galnc1 | Galnc2 |
| 11 | RPS7A  | YOR096W   | YPDcl2 | -      | EtOHcl1 | -       | Galcl1 | YPDnc1 | YPDnc2 | YPDnc3 | YPDnc4 | EtOHnc1 | EtOHnc2 | Galnc1 | Galnc2 |
| 11 | ZTA1   | YBR046C   | YPDcl2 | YPDcl3 | EtOHcl1 | EtOHcl2 | Galcl1 | -      | YPDnc2 | YPDnc3 | YPDnc4 | EtOHnc1 | -       | Galnc1 | Galnc2 |
| 11 | KGD1   | YIL125W   | YPDcl2 | YPDcl3 | -       | EtOHcl2 | Galcl1 | YPDnc1 | YPDnc2 | -      | YPDnc4 | EtOHnc1 | EtOHnc2 | Galnc1 | Galnc2 |
| 11 | TOM22  | YNL131W   | YPDcl2 | -      | EtOHcl1 | EtOHcl2 | Galcl1 | YPDnc1 | YPDnc2 | -      | YPDnc4 | EtOHnc1 | EtOHnc2 | Galnc1 | Galnc2 |
| 11 | GOS1   | YHL031C   | -      | YPDcl3 | -       | EtOHcl2 | Galcl1 | YPDnc1 | YPDnc2 | YPDnc3 | YPDnc4 | EtOHnc1 | EtOHnc2 | Galnc1 | Galnc2 |
| 11 | HLR1   | YDR528W   | YPDcl2 | YPDcl3 | EtOHcl1 | -       | Galcl1 | YPDnc1 | YPDnc2 | YPDnc3 | YPDnc4 | EtOHnc1 | -       | Galnc1 | Galnc2 |
| 11 | POL2   | YNL262W   | -      | -      | EtOHcl1 | EtOHcl2 | Galcl1 | YPDnc1 | YPDnc2 | YPDnc3 | YPDnc4 | EtOHnc1 | EtOHnc2 | Galnc1 | Galnc2 |
| 11 | BRL1   | YHR036W   | YPDcl2 | -      | -       | EtOHcl2 | Galcl1 | YPDnc1 | YPDnc2 | YPDnc3 | YPDnc4 | EtOHnc1 | EtOHnc2 | Galnc1 | Galnc2 |
| 11 | MRPL4  | YLR439W   | -      | YPDcl3 | EtOHcl1 | -       | Galcl1 | YPDnc1 | YPDnc2 | YPDnc3 | YPDnc4 | EtOHnc1 | EtOHnc2 | Galnc1 | Galnc2 |
| 11 |        | YJL220W   | YPDcl2 | -      | EtOHcl1 | -       | Galcl1 | YPDnc1 | YPDnc2 | YPDnc3 | YPDnc4 | EtOHnc1 | EtOHnc2 | Galnc1 | Galnc2 |
| 11 |        | YEL020C-B | YPDcl2 | YPDcl3 | EtOHcl1 | EtOHcl2 | Galcl1 | -      | YPDnc2 | YPDnc3 | YPDnc4 | EtOHnc1 | EtOHnc2 | -      | Galnc2 |
| 11 | RPS21A | YKR057W   | -      | YPDcl3 | EtOHcl1 | -       | Galcl1 | YPDnc1 | YPDnc2 | YPDnc3 | YPDnc4 | EtOHnc1 | EtOHnc2 | Galnc1 | Galnc2 |
| 11 |        | YDL023C   | YPDcl2 | -      | -       | EtOHcl2 | Galcl1 | YPDnc1 | YPDnc2 | YPDnc3 | YPDnc4 | EtOHnc1 | EtOHnc2 | Galnc1 | Galnc2 |
| 11 | APS3   | YJL024C   | YPDcl2 | YPDcl3 | EtOHcl1 | -       | Galcl1 | YPDnc1 | YPDnc2 | YPDnc3 | YPDnc4 | EtOHnc1 | -       | Galnc1 | Galnc2 |
| 11 |        | YPR160W-/ | YPDcl2 | YPDcl3 | -       | -       | Galcl1 | YPDnc1 | YPDnc2 | YPDnc3 | YPDnc4 | EtOHnc1 | EtOHnc2 | Galnc1 | Galnc2 |
| 11 |        | YOL155W-/ | -      | YPDcl3 | -       | EtOHcl2 | Galcl1 | YPDnc1 | YPDnc2 | YPDnc3 | YPDnc4 | EtOHnc1 | EtOHnc2 | Galnc1 | Galnc2 |
| 11 | MUB1   | YMR100W   | YPDcl2 | YPDcl3 | -       | EtOHcl2 | -      | YPDnc1 | YPDnc2 | YPDnc3 | YPDnc4 | EtOHnc1 | EtOHnc2 | Galnc1 | Galnc2 |
| 11 | TRP1   | YDR007W   | YPDcl2 | YPDcl3 | EtOHcl1 | -       | Galcl1 | YPDnc1 | YPDnc2 | YPDnc3 | YPDnc4 | -       | EtOHnc2 | Galnc1 | Galnc2 |
| 11 | INP54  | YOL065C   | YPDcl2 | YPDcl3 | EtOHcl1 | EtOHcl2 | Galcl1 | -      | -      | YPDnc3 | YPDnc4 | EtOHnc1 | EtOHnc2 | Galnc1 | Galnc2 |
| 11 | DNF2   | YDR093W   | YPDcl2 | YPDcl3 | EtOHcl1 | EtOHcl2 | Galcl1 | YPDnc1 | YPDnc2 | YPDnc3 | YPDnc4 | EtOHnc1 | -       | Galnc1 | -      |
| 11 | ADH1   | YOL086C   | YPDcl2 | YPDcl3 | EtOHcl1 | EtOHcl2 | Galcl1 | YPDnc1 | YPDnc2 | YPDnc3 | YPDnc4 | -       | -       | Galnc1 | Galnc2 |
| 11 |        | YBR032W   | -      | YPDcl3 | EtOHcl1 | -       | Galcl1 | YPDnc1 | YPDnc2 | YPDnc3 | YPDnc4 | EtOHnc1 | EtOHnc2 | Galnc1 | Galnc2 |
| 11 |        | YPL135C-A | YPDcl2 | YPDcl3 | EtOHcl1 | -       | -      | YPDnc1 | YPDnc2 | YPDnc3 | YPDnc4 | EtOHnc1 | EtOHnc2 | Galnc1 | Galnc2 |
| 11 | MSN5   | YDR335W   | YPDcl2 | -      | EtOHcl1 | EtOHcl2 | Galcl1 | YPDnc1 | YPDnc2 | YPDnc3 | YPDnc4 | -       | EtOHnc2 | Galnc1 | Galnc2 |
| 11 | BAG7   | YOR134W   | YPDcl2 | YPDcl3 | EtOHcl1 | -       | -      | YPDnc1 | YPDnc2 | YPDnc3 | YPDnc4 | EtOHnc1 | EtOHnc2 | Galnc1 | Galnc2 |
| 11 |        | YGR022C   | -      | YPDcl3 | EtOHcl1 | EtOHcl2 | Galcl1 | YPDnc1 | YPDnc2 | YPDnc3 | YPDnc4 | EtOHnc1 | EtOHnc2 | -      | Galnc2 |
| 11 | BSC1   | YDL037C   | YPDcl2 | -      | EtOHcl1 | -       | Galcl1 | YPDnc1 | YPDnc2 | YPDnc3 | YPDnc4 | EtOHnc1 | EtOHnc2 | Galnc1 | Galnc2 |
| 11 | FAP7   | YDL166C   | YPDcl2 | -      | EtOHcl1 | EtOHcl2 | Galcl1 | YPDnc1 | YPDnc2 | YPDnc3 | YPDnc4 | EtOHnc1 | -       | Galnc1 | Galnc2 |
| 11 | STE11  | YLR362W   | -      | YPDcl3 | EtOHcl1 | EtOHcl2 | Galcl1 | YPDnc1 | YPDnc2 | YPDnc3 | YPDnc4 | EtOHnc1 | -       | Galnc1 | Galnc2 |
| 11 | GUA1   | YMR217W   | -      | -      | EtOHcl1 | EtOHcl2 | Galcl1 | YPDnc1 | YPDnc2 | YPDnc3 | YPDnc4 | EtOHnc1 | EtOHnc2 | Galnc1 | Galnc2 |
| 11 | ACA1   | YER045C   | -      | YPDcl3 | EtOHcl1 | EtOHcl2 | Galcl1 | YPDnc1 | YPDnc2 | YPDnc3 | YPDnc4 | EtOHnc1 | -       | Galnc1 | Galnc2 |
| 11 | RPP0   | YLR340W   | -      | -      | EtOHcl1 | EtOHcl2 | Galcl1 | YPDnc1 | YPDnc2 | YPDnc3 | YPDnc4 | EtOHnc1 | EtOHnc2 | Galnc1 | Galnc2 |
| 11 | PPQ1   | YPL179W   | YPDcl2 | YPDcl3 | EtOHcl1 | EtOHcl2 | -      | YPDnc1 | YPDnc2 | -      | YPDnc4 | EtOHnc1 | EtOHnc2 | Galnc1 | Galnc2 |



|    |           |         |        |         |         |         |        |        |        |        |         |         |         |        |        |
|----|-----------|---------|--------|---------|---------|---------|--------|--------|--------|--------|---------|---------|---------|--------|--------|
| 11 | YER034W   | YPDcl2  | YPDcl3 | EtOHcl1 | EtOHcl2 | Galcl1  | YPDnc1 | -      | -      | YPDnc4 | EtOHnc1 | EtOHnc2 | Galnc1  | Galnc2 |        |
| 11 | RVS167    | YDR388W | -      | YPDcl3  | EtOHcl1 | -       | Galcl1 | YPDnc1 | YPDnc2 | YPDnc3 | YPDnc4  | EtOHnc1 | EtOHnc2 | Galnc1 | Galnc2 |
| 11 | YPR059C   | YPDcl2  | -      | EtOHcl1 | EtOHcl2 | Galcl1  | YPDnc1 | YPDnc2 | -      | YPDnc4 | EtOHnc1 | EtOHnc2 | Galnc1  | Galnc2 |        |
| 11 | YPL142C   | -       | -      | EtOHcl1 | EtOHcl2 | Galcl1  | YPDnc1 | YPDnc2 | YPDnc3 | YPDnc4 | EtOHnc1 | EtOHnc2 | Galnc1  | Galnc2 |        |
| 11 | RNR2      | YJL026W | YPDcl2 | YPDcl3  | EtOHcl1 | EtOHcl2 | Galcl1 | YPDnc1 | YPDnc2 | -      | -       | EtOHnc1 | EtOHnc2 | Galnc1 | Galnc2 |
| 11 | YGL074C   | -       | YPDcl3 | EtOHcl1 | -       | Galcl1  | YPDnc1 | YPDnc2 | YPDnc3 | YPDnc4 | EtOHnc1 | EtOHnc2 | Galnc1  | Galnc2 |        |
| 11 | SPO74     | YGL170C | YPDcl2 | -       | EtOHcl1 | -       | Galcl1 | YPDnc1 | YPDnc2 | YPDnc3 | YPDnc4  | EtOHnc1 | EtOHnc2 | Galnc1 | Galnc2 |
| 11 | SDT1      | YGL224C | YPDcl2 | YPDcl3  | EtOHcl1 | EtOHcl2 | Galcl1 | -      | YPDnc2 | YPDnc3 | -       | EtOHnc1 | EtOHnc2 | Galnc1 | Galnc2 |
| 11 | YPL182C   | YPDcl2  | -      | EtOHcl1 | EtOHcl2 | Galcl1  | YPDnc1 | YPDnc2 | YPDnc3 | YPDnc4 | EtOHnc1 | EtOHnc2 | -       | Galnc2 |        |
| 11 | YPL250W-7 | YPDcl2  | -      | -       | EtOHcl2 | Galcl1  | YPDnc1 | YPDnc2 | YPDnc3 | YPDnc4 | EtOHnc1 | EtOHnc2 | Galnc1  | Galnc2 |        |
| 11 | GEM1      | YAL048C | YPDcl2 | YPDcl3  | EtOHcl1 | EtOHcl2 | -      | YPDnc1 | YPDnc2 | YPDnc3 | YPDnc4  | EtOHnc1 | EtOHnc2 | Galnc1 | -      |
| 11 | YKR033C   | YPDcl2  | YPDcl3 | -       | -       | Galcl1  | YPDnc1 | YPDnc2 | YPDnc3 | YPDnc4 | EtOHnc1 | EtOHnc2 | Galnc1  | Galnc2 |        |
| 11 | DNF3      | YMR162C | YPDcl2 | YPDcl3  | -       | -       | Galcl1 | YPDnc1 | YPDnc2 | YPDnc3 | YPDnc4  | EtOHnc1 | EtOHnc2 | Galnc1 | Galnc2 |
| 11 | SSF2      | YDR312W | -      | YPDcl3  | -       | EtOHcl2 | Galcl1 | YPDnc1 | YPDnc2 | YPDnc3 | YPDnc4  | EtOHnc1 | EtOHnc2 | Galnc1 | Galnc2 |
| 11 | YGR054W   | YPDcl2  | -      | EtOHcl1 | -       | Galcl1  | YPDnc1 | YPDnc2 | YPDnc3 | YPDnc4 | EtOHnc1 | EtOHnc2 | Galnc1  | Galnc2 |        |
| 11 | YNR001W-1 | YPDcl2  | YPDcl3 | EtOHcl1 | -       | Galcl1  | YPDnc1 | YPDnc2 | YPDnc3 | YPDnc4 | EtOHnc1 | -       | Galnc1  | Galnc2 |        |
| 11 | ERG26     | YGL001C | YPDcl2 | YPDcl3  | EtOHcl1 | EtOHcl2 | Galcl1 | -      | YPDnc2 | -      | YPDnc4  | EtOHnc1 | EtOHnc2 | Galnc1 | Galnc2 |
| 11 | YOR378W   | YPDcl2  | YPDcl3 | EtOHcl1 | EtOHcl2 | Galcl1  | YPDnc1 | YPDnc2 | YPDnc3 | -      | EtOHnc1 | -       | Galnc1  | Galnc2 |        |
| 11 | VPS61     | YDR136C | -      | YPDcl3  | EtOHcl1 | EtOHcl2 | Galcl1 | YPDnc1 | YPDnc2 | YPDnc3 | YPDnc4  | EtOHnc1 | -       | Galnc1 | Galnc2 |
| 11 | KTI12     | YKL110C | -      | YPDcl3  | EtOHcl1 | -       | Galcl1 | YPDnc1 | YPDnc2 | YPDnc3 | YPDnc4  | EtOHnc1 | EtOHnc2 | Galnc1 | Galnc2 |
| 11 | HRT1      | YOL133W | YPDcl2 | -       | EtOHcl1 | -       | Galcl1 | YPDnc1 | YPDnc2 | YPDnc3 | YPDnc4  | EtOHnc1 | EtOHnc2 | Galnc1 | Galnc2 |
| 11 | CBP1      | YJL209W | YPDcl2 | -       | EtOHcl1 | -       | Galcl1 | YPDnc1 | YPDnc2 | YPDnc3 | YPDnc4  | EtOHnc1 | EtOHnc2 | Galnc1 | Galnc2 |
| 11 | YMR118C   | -       | YPDcl3 | EtOHcl1 | -       | Galcl1  | YPDnc1 | YPDnc2 | YPDnc3 | YPDnc4 | EtOHnc1 | EtOHnc2 | Galnc1  | Galnc2 |        |
| 11 | MTO1      | YGL236C | -      | -       | EtOHcl1 | EtOHcl2 | Galcl1 | YPDnc1 | YPDnc2 | YPDnc3 | YPDnc4  | EtOHnc1 | EtOHnc2 | Galnc1 | Galnc2 |
| 11 | RNH203    | YLR154C | YPDcl2 | YPDcl3  | -       | -       | Galcl1 | YPDnc1 | YPDnc2 | YPDnc3 | YPDnc4  | EtOHnc1 | EtOHnc2 | Galnc1 | Galnc2 |
| 11 | YGR269W   | YPDcl2  | YPDcl3 | -       | -       | Galcl1  | YPDnc1 | YPDnc2 | YPDnc3 | YPDnc4 | EtOHnc1 | EtOHnc2 | Galnc1  | Galnc2 |        |
| 11 | MTH1      | YDR277C | YPDcl2 | YPDcl3  | EtOHcl1 | -       | Galcl1 | YPDnc1 | YPDnc2 | -      | YPDnc4  | EtOHnc1 | EtOHnc2 | Galnc1 | Galnc2 |
| 11 | CCC1      | YLR220W | YPDcl2 | -       | EtOHcl1 | EtOHcl2 | Galcl1 | YPDnc1 | YPDnc2 | YPDnc3 | -       | EtOHnc1 | EtOHnc2 | Galnc1 | Galnc2 |
| 11 | FRS2      | YFL022C | YPDcl2 | YPDcl3  | EtOHcl1 | EtOHcl2 | Galcl1 | YPDnc1 | -      | YPDnc3 | YPDnc4  | EtOHnc1 | -       | Galnc1 | Galnc2 |
| 11 | RPS28A    | YOR167C | YPDcl2 | YPDcl3  | EtOHcl1 | EtOHcl2 | Galcl1 | -      | YPDnc2 | -      | YPDnc4  | EtOHnc1 | EtOHnc2 | Galnc1 | Galnc2 |
| 11 | PET9      | YBL030C | YPDcl2 | YPDcl3  | EtOHcl1 | -       | Galcl1 | YPDnc1 | YPDnc2 | YPDnc3 | YPDnc4  | -       | EtOHnc2 | Galnc1 | Galnc2 |
| 11 | ALG8      | YOR067C | -      | YPDcl3  | -       | EtOHcl2 | Galcl1 | YPDnc1 | YPDnc2 | YPDnc3 | YPDnc4  | EtOHnc1 | EtOHnc2 | Galnc1 | Galnc2 |
| 11 | YGL072C   | YPDcl2  | YPDcl3 | EtOHcl1 | -       | -       | Galcl1 | YPDnc1 | YPDnc2 | YPDnc3 | YPDnc4  | EtOHnc1 | EtOHnc2 | Galnc1 | Galnc2 |
| 11 | PIG2      | YIL045W | YPDcl2 | YPDcl3  | EtOHcl1 | EtOHcl2 | Galcl1 | YPDnc1 | -      | YPDnc3 | -       | EtOHnc1 | EtOHnc2 | Galnc1 | Galnc2 |

|    |        |           |        |        |         |         |        |        |        |        |        |         |         |        |        |
|----|--------|-----------|--------|--------|---------|---------|--------|--------|--------|--------|--------|---------|---------|--------|--------|
| 11 | SAS5   | YOR213C   | YPDcl2 | YPDcl3 | EtOHcl1 | -       | Galcl1 | YPDnc1 | YPDnc2 | YPDnc3 | YPDnc4 | -       | EtOHnc2 | Galnc1 | Galnc2 |
| 11 |        | YGR146C-A | -      | YPDcl3 | EtOHcl1 | EtOHcl2 | Galcl1 | YPDnc1 | YPDnc2 | -      | YPDnc4 | EtOHnc1 | EtOHnc2 | Galnc1 | Galnc2 |
| 11 |        | YDR535C   | -      | YPDcl3 | EtOHcl1 | EtOHcl2 | Galcl1 | YPDnc1 | YPDnc2 | YPDnc3 | YPDnc4 | EtOHnc1 | -       | Galnc1 | Galnc2 |
| 11 | SCP1   | YOR367W   | YPDcl2 | -      | EtOHcl1 | -       | Galcl1 | YPDnc1 | YPDnc2 | YPDnc3 | YPDnc4 | EtOHnc1 | EtOHnc2 | Galnc1 | Galnc2 |
| 11 | YUH1   | YJR099W   | YPDcl2 | YPDcl3 | EtOHcl1 | -       | Galcl1 | YPDnc1 | YPDnc2 | YPDnc3 | -      | EtOHnc1 | EtOHnc2 | Galnc1 | Galnc2 |
| 11 | KAP122 | YGL016W   | YPDcl2 | YPDcl3 | EtOHcl1 | EtOHcl2 | Galcl1 | -      | YPDnc2 | YPDnc3 | YPDnc4 | -       | EtOHnc2 | Galnc1 | Galnc2 |
| 11 |        | YGR045C   | YPDcl2 | YPDcl3 | EtOHcl1 | EtOHcl2 | Galcl1 | YPDnc1 | -      | YPDnc3 | YPDnc4 | EtOHnc1 | -       | Galnc1 | Galnc2 |
| 11 | GUK1   | YDR454C   | -      | -      | EtOHcl1 | EtOHcl2 | Galcl1 | YPDnc1 | YPDnc2 | YPDnc3 | YPDnc4 | EtOHnc1 | EtOHnc2 | Galnc1 | Galnc2 |
| 11 |        | YLR346C   | YPDcl2 | -      | EtOHcl1 | -       | Galcl1 | YPDnc1 | YPDnc2 | YPDnc3 | YPDnc4 | EtOHnc1 | EtOHnc2 | Galnc1 | Galnc2 |
| 11 | SWT1   | YOR166C   | YPDcl2 | -      | EtOHcl1 | EtOHcl2 | Galcl1 | YPDnc1 | YPDnc2 | YPDnc3 | YPDnc4 | EtOHnc1 | -       | Galnc1 | Galnc2 |
| 11 | RXT3   | YDL076C   | YPDcl2 | YPDcl3 | EtOHcl1 | -       | Galcl1 | -      | YPDnc2 | YPDnc3 | YPDnc4 | EtOHnc1 | EtOHnc2 | Galnc1 | Galnc2 |
| 11 | ATX2   | YOR079C   | -      | -      | EtOHcl1 | EtOHcl2 | Galcl1 | YPDnc1 | YPDnc2 | YPDnc3 | YPDnc4 | EtOHnc1 | EtOHnc2 | Galnc1 | Galnc2 |
| 11 |        | YNL155W   | YPDcl2 | -      | EtOHcl1 | -       | Galcl1 | YPDnc1 | YPDnc2 | YPDnc3 | YPDnc4 | EtOHnc1 | EtOHnc2 | Galnc1 | Galnc2 |
| 11 |        | YBR285W   | YPDcl2 | YPDcl3 | EtOHcl1 | -       | Galcl1 | YPDnc1 | YPDnc2 | YPDnc3 | YPDnc4 | EtOHnc1 | -       | Galnc1 | Galnc2 |
| 11 | SMD2   | YLR275W   | YPDcl2 | -      | EtOHcl1 | -       | Galcl1 | YPDnc1 | YPDnc2 | YPDnc3 | YPDnc4 | EtOHnc1 | EtOHnc2 | Galnc1 | Galnc2 |
| 11 | AIM25  | YJR100C   | YPDcl2 | YPDcl3 | EtOHcl1 | EtOHcl2 | -      | YPDnc1 | YPDnc2 | YPDnc3 | -      | EtOHnc1 | EtOHnc2 | Galnc1 | Galnc2 |
| 11 | RRT5   | YFR032C   | YPDcl2 | YPDcl3 | EtOHcl1 | EtOHcl2 | Galcl1 | YPDnc1 | -      | YPDnc3 | -      | EtOHnc1 | EtOHnc2 | Galnc1 | Galnc2 |
| 11 | SPN1   | YPR133C   | YPDcl2 | YPDcl3 | EtOHcl1 | EtOHcl2 | Galcl1 | YPDnc1 | -      | YPDnc3 | -      | EtOHnc1 | EtOHnc2 | Galnc1 | Galnc2 |
| 11 | PRP39  | YML046W   | YPDcl2 | YPDcl3 | EtOHcl1 | EtOHcl2 | Galcl1 | YPDnc1 | YPDnc2 | YPDnc3 | YPDnc4 | EtOHnc1 | -       | -      | Galnc2 |
| 11 | RRN3   | YKL125W   | -      | YPDcl3 | EtOHcl1 | EtOHcl2 | Galcl1 | YPDnc1 | YPDnc2 | -      | YPDnc4 | EtOHnc1 | EtOHnc2 | Galnc1 | Galnc2 |
| 11 | PEX8   | YGR077C   | -      | YPDcl3 | EtOHcl1 | EtOHcl2 | Galcl1 | -      | YPDnc2 | YPDnc3 | YPDnc4 | EtOHnc1 | EtOHnc2 | Galnc1 | Galnc2 |
| 11 | UBC1   | YDR177W   | YPDcl2 | YPDcl3 | EtOHcl1 | -       | Galcl1 | YPDnc1 | YPDnc2 | YPDnc3 | YPDnc4 | -       | EtOHnc2 | Galnc1 | Galnc2 |
| 11 | MON1   | YGL124C   | YPDcl2 | -      | EtOHcl1 | EtOHcl2 | Galcl1 | YPDnc1 | -      | YPDnc3 | YPDnc4 | EtOHnc1 | EtOHnc2 | Galnc1 | Galnc2 |
| 11 |        | YDR417C   | YPDcl2 | -      | EtOHcl1 | EtOHcl2 | Galcl1 | YPDnc1 | YPDnc2 | YPDnc3 | YPDnc4 | EtOHnc1 | EtOHnc2 | Galnc1 | -      |
| 11 | ISF1   | YMR081C   | YPDcl2 | -      | EtOHcl1 | -       | Galcl1 | YPDnc1 | YPDnc2 | YPDnc3 | YPDnc4 | EtOHnc1 | EtOHnc2 | Galnc1 | Galnc2 |
| 11 | INO80  | YGL150C   | YPDcl2 | -      | EtOHcl1 | -       | Galcl1 | YPDnc1 | YPDnc2 | YPDnc3 | YPDnc4 | EtOHnc1 | EtOHnc2 | Galnc1 | Galnc2 |
| 11 | MEH1   | YKR007W   | -      | YPDcl3 | EtOHcl1 | -       | Galcl1 | YPDnc1 | YPDnc2 | YPDnc3 | YPDnc4 | EtOHnc1 | EtOHnc2 | Galnc1 | Galnc2 |
| 11 |        | YKL131W   | -      | -      | EtOHcl1 | EtOHcl2 | Galcl1 | YPDnc1 | YPDnc2 | YPDnc3 | YPDnc4 | EtOHnc1 | EtOHnc2 | Galnc1 | Galnc2 |
| 11 | SPO19  | YPL130W   | YPDcl2 | -      | EtOHcl1 | -       | Galcl1 | YPDnc1 | YPDnc2 | YPDnc3 | YPDnc4 | EtOHnc1 | EtOHnc2 | Galnc1 | Galnc2 |
| 11 | FIT1   | YDR534C   | YPDcl2 | YPDcl3 | EtOHcl1 | EtOHcl2 | Galcl1 | YPDnc1 | YPDnc2 | YPDnc3 | YPDnc4 | EtOHnc1 | -       | Galnc1 | -      |
| 11 | RCN2   | YOR220W   | -      | YPDcl3 | EtOHcl1 | EtOHcl2 | Galcl1 | YPDnc1 | YPDnc2 | YPDnc3 | YPDnc4 | EtOHnc1 | -       | Galnc1 | Galnc2 |
| 11 | RIO1   | YOR119C   | -      | YPDcl3 | EtOHcl1 | EtOHcl2 | -      | YPDnc1 | YPDnc2 | YPDnc3 | YPDnc4 | EtOHnc1 | EtOHnc2 | Galnc1 | Galnc2 |
| 11 |        | YPR177C   | -      | YPDcl3 | EtOHcl1 | -       | Galcl1 | YPDnc1 | YPDnc2 | YPDnc3 | YPDnc4 | EtOHnc1 | EtOHnc2 | Galnc1 | Galnc2 |
| 11 |        | YJR120W   | YPDcl2 | -      | EtOHcl1 | -       | Galcl1 | YPDnc1 | YPDnc2 | YPDnc3 | YPDnc4 | EtOHnc1 | EtOHnc2 | Galnc1 | Galnc2 |

|    |        |           |        |        |         |         |        |        |        |        |        |         |         |        |        |
|----|--------|-----------|--------|--------|---------|---------|--------|--------|--------|--------|--------|---------|---------|--------|--------|
| 11 | AGA2   | YGL032C   | -      | -      | EtOHcl1 | EtOHcl2 | Galcl1 | YPDnc1 | YPDnc2 | YPDnc3 | YPDnc4 | EtOHnc1 | EtOHnc2 | Galnc1 | Galnc2 |
| 11 | SAM3   | YPL274W   | YPDcl2 | YPDcl3 | EtOHcl1 | EtOHcl2 | Galcl1 | YPDnc1 | YPDnc2 | YPDnc3 | -      | EtOHnc1 | EtOHnc2 | -      | Galnc2 |
| 11 | COS8   | YHL048W   | -      | -      | EtOHcl1 | EtOHcl2 | Galcl1 | YPDnc1 | YPDnc2 | YPDnc3 | YPDnc4 | EtOHnc1 | EtOHnc2 | Galnc1 | Galnc2 |
| 11 |        | YDL007C-A | YPDcl2 | YPDcl3 | EtOHcl1 | -       | Galcl1 | YPDnc1 | YPDnc2 | YPDnc3 | -      | EtOHnc1 | EtOHnc2 | Galnc1 | Galnc2 |
| 11 |        | YGR228W   | -      | YPDcl3 | -       | EtOHcl2 | Galcl1 | YPDnc1 | YPDnc2 | YPDnc3 | YPDnc4 | EtOHnc1 | EtOHnc2 | Galnc1 | Galnc2 |
| 11 |        | YDR250C   | -      | YPDcl3 | EtOHcl1 | EtOHcl2 | Galcl1 | YPDnc1 | -      | YPDnc3 | YPDnc4 | EtOHnc1 | EtOHnc2 | Galnc1 | Galnc2 |
| 11 | MIG3   | YER028C   | YPDcl2 | -      | EtOHcl1 | EtOHcl2 | Galcl1 | -      | YPDnc2 | YPDnc3 | YPDnc4 | EtOHnc1 | EtOHnc2 | Galnc1 | Galnc2 |
| 11 | CSM4   | YPL200W   | YPDcl2 | YPDcl3 | EtOHcl1 | EtOHcl2 | Galcl1 | YPDnc1 | -      | -      | YPDnc4 | EtOHnc1 | EtOHnc2 | Galnc1 | Galnc2 |
| 11 | TEF4   | YKL081W   | YPDcl2 | -      | EtOHcl1 | EtOHcl2 | Galcl1 | YPDnc1 | -      | YPDnc3 | YPDnc4 | EtOHnc1 | EtOHnc2 | Galnc1 | Galnc2 |
| 11 | SRL2   | YLR082C   | -      | YPDcl3 | EtOHcl1 | EtOHcl2 | Galcl1 | YPDnc1 | YPDnc2 | YPDnc3 | -      | EtOHnc1 | EtOHnc2 | Galnc1 | Galnc2 |
| 11 | RPL24A | YGL031C   | -      | -      | EtOHcl1 | EtOHcl2 | Galcl1 | YPDnc1 | YPDnc2 | YPDnc3 | YPDnc4 | EtOHnc1 | EtOHnc2 | Galnc1 | Galnc2 |
| 11 |        | YMR272W   | YPDcl2 | YPDcl3 | EtOHcl1 | -       | Galcl1 | YPDnc1 | YPDnc2 | YPDnc3 | YPDnc4 | EtOHnc1 | -       | Galnc1 | Galnc2 |
| 11 | GPA2   | YER020W   | YPDcl2 | YPDcl3 | EtOHcl1 | EtOHcl2 | Galcl1 | YPDnc1 | YPDnc2 | -      | YPDnc4 | EtOHnc1 | -       | Galnc1 | Galnc2 |
| 11 | NRG2   | YBR066C   | YPDcl2 | -      | EtOHcl1 | -       | Galcl1 | YPDnc1 | YPDnc2 | YPDnc3 | YPDnc4 | EtOHnc1 | EtOHnc2 | Galnc1 | Galnc2 |
| 11 |        | YNR003W-  | YPDcl2 | YPDcl3 | EtOHcl1 | -       | Galcl1 | YPDnc1 | YPDnc2 | YPDnc3 | YPDnc4 | EtOHnc1 | -       | Galnc1 | Galnc2 |
| 11 | YTH1   | YPR107C   | -      | YPDcl3 | EtOHcl1 | EtOHcl2 | Galcl1 | YPDnc1 | YPDnc2 | -      | YPDnc4 | EtOHnc1 | EtOHnc2 | Galnc1 | Galnc2 |
| 11 | POP4   | YBR257W   | YPDcl2 | YPDcl3 | EtOHcl1 | EtOHcl2 | Galcl1 | -      | YPDnc2 | YPDnc3 | YPDnc4 | EtOHnc1 | EtOHnc2 | Galnc1 | -      |
| 11 |        | YDL199C   | -      | YPDcl3 | EtOHcl1 | EtOHcl2 | Galcl1 | YPDnc1 | YPDnc2 | -      | YPDnc4 | EtOHnc1 | EtOHnc2 | Galnc1 | Galnc2 |
| 10 | DLS1   | YJL065C   | YPDcl2 | -      | EtOHcl1 | -       | Galcl1 | YPDnc1 | YPDnc2 | YPDnc3 | YPDnc4 | EtOHnc1 | EtOHnc2 | -      | Galnc2 |
| 10 | PXA1   | YPL147W   | YPDcl2 | YPDcl3 | EtOHcl1 | EtOHcl2 | Galcl1 | YPDnc1 | YPDnc2 | YPDnc3 | YPDnc4 | -       | EtOHnc2 | -      | -      |
| 10 |        | YLR299C-A | -      | YPDcl3 | EtOHcl1 | -       | Galcl1 | YPDnc1 | YPDnc2 | YPDnc3 | YPDnc4 | EtOHnc1 | -       | Galnc1 | Galnc2 |
| 10 | PRO2   | YOR323C   | -      | YPDcl3 | EtOHcl1 | EtOHcl2 | Galcl1 | -      | YPDnc2 | YPDnc3 | YPDnc4 | EtOHnc1 | -       | Galnc1 | Galnc2 |
| 10 | TIM50  | YPL063W   | YPDcl2 | YPDcl3 | EtOHcl1 | EtOHcl2 | Galcl1 | YPDnc1 | YPDnc2 | -      | -      | EtOHnc1 | -       | Galnc1 | Galnc2 |
| 10 |        | YGR115C   | YPDcl2 | YPDcl3 | -       | EtOHcl2 | Galcl1 | YPDnc1 | YPDnc2 | -      | YPDnc4 | EtOHnc1 | -       | Galnc1 | Galnc2 |
| 10 | CET1   | YPL228W   | YPDcl2 | YPDcl3 | EtOHcl1 | EtOHcl2 | Galcl1 | -      | YPDnc2 | YPDnc3 | YPDnc4 | -       | -       | Galnc1 | Galnc2 |
| 10 | IPT1   | YDR072C   | YPDcl2 | YPDcl3 | EtOHcl1 | -       | Galcl1 | YPDnc1 | YPDnc2 | -      | YPDnc4 | EtOHnc1 | -       | Galnc1 | Galnc2 |
| 10 | RPL9A  | YGL147C   | YPDcl2 | YPDcl3 | -       | -       | -      | YPDnc1 | YPDnc2 | YPDnc3 | YPDnc4 | EtOHnc1 | EtOHnc2 | Galnc1 | Galnc2 |
| 10 |        | YDR049W   | -      | -      | EtOHcl1 | EtOHcl2 | Galcl1 | YPDnc1 | YPDnc2 | YPDnc3 | YPDnc4 | EtOHnc1 | -       | Galnc1 | Galnc2 |
| 10 | BSP1   | YPR171W   | -      | YPDcl3 | EtOHcl1 | -       | -      | YPDnc1 | YPDnc2 | YPDnc3 | YPDnc4 | EtOHnc1 | EtOHnc2 | Galnc1 | Galnc2 |
| 10 | DAP2   | YHR028C   | YPDcl2 | YPDcl3 | EtOHcl1 | EtOHcl2 | Galcl1 | -      | YPDnc2 | YPDnc3 | YPDnc4 | -       | EtOHnc2 | Galnc1 | -      |
| 10 |        | YPL107W   | YPDcl2 | YPDcl3 | EtOHcl1 | EtOHcl2 | Galcl1 | YPDnc1 | -      | -      | YPDnc4 | EtOHnc1 | EtOHnc2 | -      | Galnc2 |
| 10 | STP4   | YDL048C   | YPDcl2 | YPDcl3 | EtOHcl1 | EtOHcl2 | -      | YPDnc1 | -      | YPDnc3 | -      | EtOHnc1 | EtOHnc2 | Galnc1 | Galnc2 |
| 10 | HXT4   | YHR092C   | -      | -      | EtOHcl1 | -       | Galcl1 | YPDnc1 | YPDnc2 | YPDnc3 | YPDnc4 | EtOHnc1 | EtOHnc2 | Galnc1 | Galnc2 |
| 10 | NAT3   | YPR131C   | YPDcl2 | YPDcl3 | EtOHcl1 | EtOHcl2 | Galcl1 | YPDnc1 | YPDnc2 | -      | YPDnc4 | EtOHnc1 | EtOHnc2 | -      | -      |

|    |       |           |        |        |         |         |        |        |        |        |        |         |         |        |        |
|----|-------|-----------|--------|--------|---------|---------|--------|--------|--------|--------|--------|---------|---------|--------|--------|
| 10 | GLO2  | YDR272W   | -      | YPDcl3 | EtOHcl1 | -       | Galcl1 | YPDnc1 | YPDnc2 | YPDnc3 | -      | EtOHnc1 | EtOHnc2 | Galnc1 | Galnc2 |
| 10 |       | YOR238W   | -      | -      | -       | EtOHcl2 | Galcl1 | YPDnc1 | YPDnc2 | YPDnc3 | YPDnc4 | EtOHnc1 | EtOHnc2 | Galnc1 | Galnc2 |
| 10 |       | YGR210C   | YPDcl2 | YPDcl3 | EtOHcl1 | EtOHcl2 | Galcl1 | YPDnc1 | -      | -      | -      | EtOHnc1 | EtOHnc2 | Galnc1 | Galnc2 |
| 10 |       | YKL107W   | YPDcl2 | -      | EtOHcl1 | -       | Galcl1 | YPDnc1 | YPDnc2 | YPDnc3 | YPDnc4 | EtOHnc1 | EtOHnc2 | -      | Galnc2 |
| 10 | FDH1  | YOR388C   | YPDcl2 | YPDcl3 | -       | -       | -      | YPDnc1 | YPDnc2 | YPDnc3 | YPDnc4 | EtOHnc1 | EtOHnc2 | Galnc1 | Galnc2 |
| 10 | NOC3  | YLR002C   | YPDcl2 | YPDcl3 | EtOHcl1 | EtOHcl2 | Galcl1 | YPDnc1 | YPDnc2 | YPDnc3 | -      | -       | EtOHnc2 | -      | Galnc2 |
| 10 | ARK1  | YNL020C   | YPDcl2 | YPDcl3 | EtOHcl1 | EtOHcl2 | Galcl1 | -      | -      | -      | YPDnc4 | EtOHnc1 | EtOHnc2 | Galnc1 | Galnc2 |
| 10 | FKH2  | YNL068C   | YPDcl2 | YPDcl3 | -       | EtOHcl2 | Galcl1 | YPDnc1 | YPDnc2 | -      | -      | EtOHnc1 | EtOHnc2 | Galnc1 | Galnc2 |
| 10 |       | YJL049W   | -      | YPDcl3 | EtOHcl1 | -       | Galcl1 | YPDnc1 | YPDnc2 | YPDnc3 | YPDnc4 | EtOHnc1 | -       | Galnc1 | Galnc2 |
| 10 | BRN1  | YBL097W   | YPDcl2 | -      | EtOHcl1 | -       | Galcl1 | YPDnc1 | YPDnc2 | YPDnc3 | YPDnc4 | EtOHnc1 | EtOHnc2 | -      | Galnc2 |
| 10 |       | YAR070C   | YPDcl2 | -      | EtOHcl1 | EtOHcl2 | Galcl1 | YPDnc1 | YPDnc2 | YPDnc3 | YPDnc4 | -       | EtOHnc2 | Galnc1 | -      |
| 10 | SRS2  | YJL092W   | YPDcl2 | YPDcl3 | EtOHcl1 | EtOHcl2 | Galcl1 | -      | YPDnc2 | YPDnc3 | YPDnc4 | -       | EtOHnc2 | Galnc1 | -      |
| 10 | INP52 | YNL106C   | -      | YPDcl3 | EtOHcl1 | EtOHcl2 | Galcl1 | YPDnc1 | YPDnc2 | YPDnc3 | YPDnc4 | -       | EtOHnc2 | Galnc1 | -      |
| 10 | SNX41 | YDR425W   | -      | -      | EtOHcl1 | EtOHcl2 | Galcl1 | YPDnc1 | YPDnc2 | YPDnc3 | YPDnc4 | EtOHnc1 | -       | Galnc1 | Galnc2 |
| 10 | DIP2  | YLR129W   | YPDcl2 | -      | EtOHcl1 | -       | Galcl1 | YPDnc1 | YPDnc2 | YPDnc3 | -      | EtOHnc1 | EtOHnc2 | Galnc1 | Galnc2 |
| 10 | SGF73 | YGL066W   | YPDcl2 | YPDcl3 | EtOHcl1 | EtOHcl2 | Galcl1 | YPDnc1 | YPDnc2 | -      | YPDnc4 | EtOHnc1 | -       | Galnc1 | -      |
| 10 | PRY3  | YJL078C   | -      | -      | EtOHcl1 | EtOHcl2 | -      | YPDnc1 | YPDnc2 | YPDnc3 | YPDnc4 | EtOHnc1 | EtOHnc2 | Galnc1 | Galnc2 |
| 10 | GPR1  | YDL035C   | -      | -      | EtOHcl1 | EtOHcl2 | Galcl1 | YPDnc1 | YPDnc2 | YPDnc3 | YPDnc4 | EtOHnc1 | EtOHnc2 | Galnc1 | -      |
| 10 |       | YML012C-A | YPDcl2 | -      | EtOHcl1 | EtOHcl2 | Galcl1 | YPDnc1 | YPDnc2 | YPDnc3 | YPDnc4 | -       | EtOHnc2 | Galnc1 | -      |
| 10 |       | YCR018C-A | YPDcl2 | YPDcl3 | -       | -       | Galcl1 | YPDnc1 | YPDnc2 | YPDnc3 | YPDnc4 | EtOHnc1 | -       | Galnc1 | Galnc2 |
| 10 | IOC3  | YFR013W   | -      | YPDcl3 | -       | -       | Galcl1 | YPDnc1 | YPDnc2 | YPDnc3 | YPDnc4 | EtOHnc1 | EtOHnc2 | Galnc1 | Galnc2 |
| 10 | YPK2  | YMR104C   | YPDcl2 | YPDcl3 | EtOHcl1 | -       | Galcl1 | YPDnc1 | -      | -      | YPDnc4 | EtOHnc1 | EtOHnc2 | Galnc1 | Galnc2 |
| 10 | CTK1  | YKL139W   | YPDcl2 | YPDcl3 | EtOHcl1 | EtOHcl2 | Galcl1 | -      | YPDnc2 | YPDnc3 | YPDnc4 | -       | EtOHnc2 | Galnc1 | -      |
| 10 | VPS17 | YOR132W   | -      | YPDcl3 | EtOHcl1 | -       | Galcl1 | YPDnc1 | YPDnc2 | YPDnc3 | YPDnc4 | EtOHnc1 | EtOHnc2 | Galnc1 | -      |
| 10 | RMA1  | YKL132C   | YPDcl2 | YPDcl3 | EtOHcl1 | EtOHcl2 | Galcl1 | -      | -      | -      | YPDnc4 | EtOHnc1 | EtOHnc2 | Galnc1 | Galnc2 |
| 10 |       | YMR158C-A | YPDcl2 | -      | EtOHcl1 | -       | Galcl1 | YPDnc1 | YPDnc2 | YPDnc3 | YPDnc4 | EtOHnc1 | -       | Galnc1 | Galnc2 |
| 10 | SRB7  | YDR308C   | -      | YPDcl3 | EtOHcl1 | EtOHcl2 | Galcl1 | YPDnc1 | -      | -      | YPDnc4 | EtOHnc1 | EtOHnc2 | Galnc1 | Galnc2 |
| 10 |       | YDR215C   | -      | YPDcl3 | -       | -       | Galcl1 | YPDnc1 | YPDnc2 | YPDnc3 | YPDnc4 | EtOHnc1 | EtOHnc2 | Galnc1 | Galnc2 |
| 10 | TMA7  | YLR262C-A | -      | -      | EtOHcl1 | EtOHcl2 | Galcl1 | YPDnc1 | YPDnc2 | YPDnc3 | -      | EtOHnc1 | EtOHnc2 | Galnc1 | Galnc2 |
| 10 | UBX2  | YML013W   | YPDcl2 | -      | EtOHcl1 | EtOHcl2 | Galcl1 | YPDnc1 | YPDnc2 | YPDnc3 | YPDnc4 | -       | EtOHnc2 | Galnc1 | -      |
| 10 | CCH1  | YGR217W   | YPDcl2 | YPDcl3 | EtOHcl1 | -       | Galcl1 | YPDnc1 | YPDnc2 | -      | -      | EtOHnc1 | EtOHnc2 | Galnc1 | Galnc2 |
| 10 |       | YEL014C   | -      | -      | EtOHcl1 | EtOHcl2 | Galcl1 | YPDnc1 | YPDnc2 | YPDnc3 | YPDnc4 | EtOHnc1 | -       | Galnc1 | Galnc2 |
| 10 | PCL2  | YDL127W   | YPDcl2 | YPDcl3 | EtOHcl1 | EtOHcl2 | Galcl1 | YPDnc1 | -      | YPDnc3 | -      | EtOHnc1 | -       | Galnc1 | Galnc2 |
| 10 |       | YHR139C-A | YPDcl2 | YPDcl3 | EtOHcl1 | -       | Galcl1 | YPDnc1 | -      | -      | YPDnc4 | EtOHnc1 | EtOHnc2 | Galnc1 | Galnc2 |

|          |         |        |        |         |         |        |        |        |        |        |         |         |        |        |
|----------|---------|--------|--------|---------|---------|--------|--------|--------|--------|--------|---------|---------|--------|--------|
| 10 GAS5  | YOL030W | -      | YPDcl3 | EtOHcl1 | EtOHcl2 | -      | YPDnc1 | -      | YPDnc3 | YPDnc4 | EtOHnc1 | EtOHnc2 | Galnc1 | Galnc2 |
| 10 VPS66 | YPR139C | YPDcl2 | -      | -       | EtOHcl2 | Galcl1 | YPDnc1 | YPDnc2 | YPDnc3 | YPDnc4 | EtOHnc1 | -       | Galnc1 | Galnc2 |
| 10       | YDL221W | -      | YPDcl3 | EtOHcl1 | EtOHcl2 | Galcl1 | YPDnc1 | YPDnc2 | YPDnc3 | -      | EtOHnc1 | -       | Galnc1 | Galnc2 |
| 10 TBS1  | YBR150C | -      | YPDcl3 | EtOHcl1 | EtOHcl2 | Galcl1 | YPDnc1 | YPDnc2 | -      | -      | EtOHnc1 | EtOHnc2 | Galnc1 | Galnc2 |
| 10 HAL9  | YOL089C | YPDcl2 | YPDcl3 | EtOHcl1 | -       | Galcl1 | -      | YPDnc2 | YPDnc3 | YPDnc4 | EtOHnc1 | EtOHnc2 | -      | Galnc2 |
| 10 CRS5  | YOR031W | YPDcl2 | YPDcl3 | EtOHcl1 | -       | -      | YPDnc1 | YPDnc2 | YPDnc3 | YPDnc4 | -       | EtOHnc2 | Galnc1 | Galnc2 |
| 10       | YLR118C | YPDcl2 | -      | EtOHcl1 | -       | Galcl1 | YPDnc1 | YPDnc2 | YPDnc3 | YPDnc4 | EtOHnc1 | -       | Galnc1 | Galnc2 |
| 10 ALR1  | YOL130W | YPDcl2 | -      | EtOHcl1 | -       | -      | YPDnc1 | YPDnc2 | YPDnc3 | YPDnc4 | EtOHnc1 | EtOHnc2 | Galnc1 | Galnc2 |
| 10 SPG4  | YMR107W | -      | -      | EtOHcl1 | -       | Galcl1 | YPDnc1 | YPDnc2 | YPDnc3 | YPDnc4 | EtOHnc1 | EtOHnc2 | Galnc1 | Galnc2 |
| 10 GAL11 | YOL051W | YPDcl2 | YPDcl3 | EtOHcl1 | EtOHcl2 | Galcl1 | -      | YPDnc2 | YPDnc3 | YPDnc4 | -       | EtOHnc2 | -      | Galnc2 |
| 10       | YBL096C | -      | YPDcl3 | EtOHcl1 | -       | Galcl1 | YPDnc1 | YPDnc2 | YPDnc3 | YPDnc4 | EtOHnc1 | EtOHnc2 | Galnc1 | -      |
| 10 DMR1  | YGR150C | YPDcl2 | YPDcl3 | EtOHcl1 | EtOHcl2 | Galcl1 | -      | YPDnc2 | YPDnc3 | YPDnc4 | -       | EtOHnc2 | -      | Galnc2 |
| 10 SCD5  | YOR329C | YPDcl2 | YPDcl3 | EtOHcl1 | EtOHcl2 | Galcl1 | -      | YPDnc2 | YPDnc3 | YPDnc4 | -       | EtOHnc2 | -      | Galnc2 |
| 10 SMC2  | YFR031C | -      | -      | EtOHcl1 | EtOHcl2 | -      | YPDnc1 | YPDnc2 | YPDnc3 | YPDnc4 | EtOHnc1 | EtOHnc2 | Galnc1 | Galnc2 |
| 10 MSR1  | YHR091C | -      | YPDcl3 | EtOHcl1 | EtOHcl2 | Galcl1 | YPDnc1 | YPDnc2 | YPDnc3 | -      | EtOHnc1 | EtOHnc2 | -      | Galnc2 |
| 10 CUE4  | YML101C | -      | YPDcl3 | EtOHcl1 | EtOHcl2 | Galcl1 | YPDnc1 | YPDnc2 | YPDnc3 | YPDnc4 | -       | -       | Galnc1 | Galnc2 |
| 10 PGD1  | YGL025C | -      | YPDcl3 | -       | EtOHcl2 | Galcl1 | -      | YPDnc2 | YPDnc3 | YPDnc4 | EtOHnc1 | EtOHnc2 | Galnc1 | Galnc2 |
| 10 FET3  | YMR058W | -      | YPDcl3 | EtOHcl1 | EtOHcl2 | -      | YPDnc1 | YPDnc2 | YPDnc3 | -      | EtOHnc1 | EtOHnc2 | Galnc1 | Galnc2 |
| 10 RBG2  | YGR173W | YPDcl2 | YPDcl3 | EtOHcl1 | -       | Galcl1 | -      | YPDnc2 | YPDnc3 | YPDnc4 | EtOHnc1 | EtOHnc2 | -      | Galnc2 |
| 10 ATO2  | YNR002C | YPDcl2 | YPDcl3 | EtOHcl1 | -       | Galcl1 | YPDnc1 | YPDnc2 | YPDnc3 | YPDnc4 | EtOHnc1 | -       | -      | Galnc2 |
| 10       | YPR150W | YPDcl2 | YPDcl3 | -       | -       | Galcl1 | YPDnc1 | YPDnc2 | YPDnc3 | YPDnc4 | EtOHnc1 | -       | Galnc1 | Galnc2 |
| 10 TFB1  | YDR311W | -      | YPDcl3 | EtOHcl1 | -       | Galcl1 | YPDnc1 | YPDnc2 | YPDnc3 | YPDnc4 | -       | EtOHnc2 | Galnc1 | Galnc2 |
| 10 ECM22 | YLR228C | YPDcl2 | -      | -       | -       | Galcl1 | YPDnc1 | YPDnc2 | YPDnc3 | YPDnc4 | EtOHnc1 | EtOHnc2 | Galnc1 | Galnc2 |
| 10 TMA19 | YKL056C | YPDcl2 | -      | EtOHcl1 | EtOHcl2 | -      | YPDnc1 | -      | YPDnc3 | YPDnc4 | EtOHnc1 | EtOHnc2 | Galnc1 | Galnc2 |
| 10 EMP24 | YGL200C | YPDcl2 | -      | EtOHcl1 | EtOHcl2 | Galcl1 | YPDnc1 | -      | -      | YPDnc4 | EtOHnc1 | EtOHnc2 | Galnc1 | Galnc2 |
| 10 AEP3  | YPL005W | YPDcl2 | YPDcl3 | EtOHcl1 | -       | Galcl1 | YPDnc1 | YPDnc2 | YPDnc3 | YPDnc4 | -       | -       | Galnc1 | Galnc2 |
| 10       | YCR064C | -      | YPDcl3 | EtOHcl1 | -       | -      | YPDnc1 | YPDnc2 | YPDnc3 | YPDnc4 | EtOHnc1 | EtOHnc2 | Galnc1 | Galnc2 |
| 10 HPT1  | YDR399W | -      | -      | EtOHcl1 | -       | Galcl1 | YPDnc1 | YPDnc2 | YPDnc3 | YPDnc4 | EtOHnc1 | EtOHnc2 | Galnc1 | Galnc2 |
| 10 YLH47 | YPR125W | YPDcl2 | YPDcl3 | EtOHcl1 | -       | Galcl1 | YPDnc1 | -      | YPDnc3 | YPDnc4 | EtOHnc1 | -       | Galnc1 | Galnc2 |
| 10 IML2  | YJL082W | -      | -      | -       | EtOHcl2 | Galcl1 | YPDnc1 | YPDnc2 | YPDnc3 | YPDnc4 | EtOHnc1 | EtOHnc2 | Galnc1 | Galnc2 |
| 10 RRP46 | YGR095C | YPDcl2 | -      | -       | EtOHcl2 | Galcl1 | YPDnc1 | -      | YPDnc3 | YPDnc4 | EtOHnc1 | EtOHnc2 | Galnc1 | Galnc2 |
| 10 SPS2  | YDR522C | YPDcl2 | -      | -       | -       | Galcl1 | YPDnc1 | YPDnc2 | YPDnc3 | YPDnc4 | EtOHnc1 | EtOHnc2 | Galnc1 | Galnc2 |
| 10 MAM1  | YER106W | YPDcl2 | -      | EtOHcl1 | -       | -      | YPDnc1 | YPDnc2 | YPDnc3 | YPDnc4 | EtOHnc1 | EtOHnc2 | Galnc1 | Galnc2 |
| 10 ERP6  | YGL002W | -      | -      | EtOHcl1 | EtOHcl2 | Galcl1 | YPDnc1 | YPDnc2 | YPDnc3 | YPDnc4 | -       | EtOHnc2 | Galnc1 | Galnc2 |

|           |           |        |        |         |         |        |        |        |        |        |         |         |        |        |
|-----------|-----------|--------|--------|---------|---------|--------|--------|--------|--------|--------|---------|---------|--------|--------|
| 10 MRPL3  | YMR024W   | YPDcl2 | -      | EtOHcl1 | EtOHcl2 | Galcl1 | YPDnc1 | YPDnc2 | YPDnc3 | -      | EtOHnc1 | -       | Galnc1 | Galnc2 |
| 10        | YOR316C-A | -      | -      | EtOHcl1 | -       | Galcl1 | YPDnc1 | YPDnc2 | YPDnc3 | YPDnc4 | EtOHnc1 | EtOHnc2 | Galnc1 | Galnc2 |
| 10 REC114 | YMR133W   | YPDcl2 | YPDcl3 | EtOHcl1 | -       | Galcl1 | YPDnc1 | YPDnc2 | YPDnc3 | -      | EtOHnc1 | EtOHnc2 | Galnc1 | -      |
| 10 LEU1   | YGL009C   | YPDcl2 | YPDcl3 | EtOHcl1 | EtOHcl2 | Galcl1 | -      | -      | YPDnc3 | YPDnc4 | -       | EtOHnc2 | Galnc1 | Galnc2 |
| 10 DIA3   | YDL024C   | -      | YPDcl3 | EtOHcl1 | EtOHcl2 | Galcl1 | -      | YPDnc2 | YPDnc3 | -      | EtOHnc1 | EtOHnc2 | Galnc1 | Galnc2 |
| 10 VIP1   | YLR410W   | -      | YPDcl3 | EtOHcl1 | -       | -      | YPDnc1 | YPDnc2 | YPDnc3 | YPDnc4 | EtOHnc1 | EtOHnc2 | Galnc1 | Galnc2 |
| 10        | YPL261C   | -      | YPDcl3 | -       | EtOHcl2 | Galcl1 | YPDnc1 | YPDnc2 | -      | YPDnc4 | EtOHnc1 | EtOHnc2 | Galnc1 | Galnc2 |
| 10 HIS1   | YER055C   | YPDcl2 | -      | EtOHcl1 | EtOHcl2 | Galcl1 | YPDnc1 | -      | -      | YPDnc4 | EtOHnc1 | EtOHnc2 | Galnc1 | Galnc2 |
| 10 RRP3   | YHR065C   | YPDcl2 | -      | EtOHcl1 | -       | Galcl1 | YPDnc1 | YPDnc2 | YPDnc3 | YPDnc4 | EtOHnc1 | EtOHnc2 | Galnc1 | -      |
| 10        | YDR426C   | -      | -      | EtOHcl1 | EtOHcl2 | Galcl1 | YPDnc1 | YPDnc2 | YPDnc3 | YPDnc4 | EtOHnc1 | -       | Galnc1 | Galnc2 |
| 10 MPP10  | YJR002W   | YPDcl2 | YPDcl3 | -       | -       | Galcl1 | YPDnc1 | YPDnc2 | YPDnc3 | YPDnc4 | EtOHnc1 | -       | Galnc1 | Galnc2 |
| 10 YJU3   | YKL094W   | -      | YPDcl3 | EtOHcl1 | -       | Galcl1 | YPDnc1 | YPDnc2 | YPDnc3 | -      | EtOHnc1 | EtOHnc2 | Galnc1 | Galnc2 |
| 10 PAU20  | YOL161C   | -      | -      | EtOHcl1 | -       | Galcl1 | YPDnc1 | YPDnc2 | YPDnc3 | YPDnc4 | EtOHnc1 | EtOHnc2 | Galnc1 | Galnc2 |
| 10        | YLR152C   | -      | -      | EtOHcl1 | EtOHcl2 | -      | YPDnc1 | YPDnc2 | YPDnc3 | YPDnc4 | EtOHnc1 | EtOHnc2 | Galnc1 | Galnc2 |
| 10 RPN5   | YDL147W   | -      | YPDcl3 | EtOHcl1 | -       | Galcl1 | YPDnc1 | YPDnc2 | YPDnc3 | YPDnc4 | -       | EtOHnc2 | Galnc1 | Galnc2 |
| 10 HOF1   | YMR032W   | YPDcl2 | YPDcl3 | EtOHcl1 | EtOHcl2 | Galcl1 | YPDnc1 | YPDnc2 | YPDnc3 | YPDnc4 | -       | EtOHnc2 | -      | -      |
| 10 BSC4   | YNL269W   | YPDcl2 | -      | EtOHcl1 | -       | Galcl1 | YPDnc1 | -      | YPDnc3 | YPDnc4 | EtOHnc1 | EtOHnc2 | Galnc1 | Galnc2 |
| 10 SFG1   | YOR315W   | -      | -      | EtOHcl1 | EtOHcl2 | -      | YPDnc1 | YPDnc2 | YPDnc3 | YPDnc4 | EtOHnc1 | EtOHnc2 | Galnc1 | Galnc2 |
| 10 AXL1   | YPR122W   | YPDcl2 | YPDcl3 | EtOHcl1 | -       | Galcl1 | YPDnc1 | YPDnc2 | YPDnc3 | YPDnc4 | -       | -       | Galnc1 | Galnc2 |
| 10 SAT4   | YCR008W   | YPDcl2 | YPDcl3 | EtOHcl1 | EtOHcl2 | Galcl1 | YPDnc1 | -      | -      | YPDnc4 | EtOHnc1 | -       | Galnc1 | Galnc2 |
| 10        | YHR020W   | YPDcl2 | YPDcl3 | EtOHcl1 | EtOHcl2 | -      | -      | YPDnc2 | YPDnc3 | YPDnc4 | EtOHnc1 | -       | Galnc1 | Galnc2 |
| 10 RPL27B | YDR471W   | YPDcl2 | -      | EtOHcl1 | EtOHcl2 | Galcl1 | YPDnc1 | -      | -      | YPDnc4 | EtOHnc1 | EtOHnc2 | Galnc1 | Galnc2 |
| 10 MRPS8  | YMR158W   | YPDcl2 | -      | EtOHcl1 | -       | Galcl1 | YPDnc1 | YPDnc2 | YPDnc3 | YPDnc4 | EtOHnc1 | -       | Galnc1 | Galnc2 |
| 10 GGA1   | YDR358W   | -      | -      | EtOHcl1 | EtOHcl2 | -      | YPDnc1 | YPDnc2 | YPDnc3 | YPDnc4 | EtOHnc1 | EtOHnc2 | Galnc1 | Galnc2 |
| 10 YIM2   | YMR151W   | YPDcl2 | YPDcl3 | EtOHcl1 | -       | Galcl1 | -      | YPDnc2 | YPDnc3 | YPDnc4 | -       | EtOHnc2 | Galnc1 | Galnc2 |
| 10        | YHR032C-A | YPDcl2 | -      | EtOHcl1 | EtOHcl2 | -      | YPDnc1 | YPDnc2 | YPDnc3 | YPDnc4 | EtOHnc1 | -       | Galnc1 | Galnc2 |
| 10 NAS6   | YGR232W   | -      | -      | EtOHcl1 | EtOHcl2 | -      | YPDnc1 | YPDnc2 | YPDnc3 | YPDnc4 | EtOHnc1 | EtOHnc2 | Galnc1 | Galnc2 |
| 10 AIM39  | YOL053W   | YPDcl2 | YPDcl3 | EtOHcl1 | -       | Galcl1 | YPDnc1 | YPDnc2 | YPDnc3 | YPDnc4 | -       | -       | Galnc1 | Galnc2 |
| 10 UTP14  | YML093W   | YPDcl2 | YPDcl3 | EtOHcl1 | EtOHcl2 | Galcl1 | YPDnc1 | -      | YPDnc3 | -      | EtOHnc1 | EtOHnc2 | Galnc1 | -      |
| 10 SEC22  | YLR268W   | YPDcl2 | YPDcl3 | EtOHcl1 | -       | -      | YPDnc1 | YPDnc2 | YPDnc3 | YPDnc4 | EtOHnc1 | EtOHnc2 | Galnc1 | -      |
| 10 POL5   | YEL055C   | -      | -      | EtOHcl1 | -       | Galcl1 | YPDnc1 | YPDnc2 | YPDnc3 | YPDnc4 | EtOHnc1 | EtOHnc2 | Galnc1 | Galnc2 |
| 10 ALD3   | YMR169C   | YPDcl2 | YPDcl3 | -       | EtOHcl2 | Galcl1 | YPDnc1 | YPDnc2 | YPDnc3 | YPDnc4 | -       | -       | Galnc1 | Galnc2 |
| 10        | YPL251W   | -      | YPDcl3 | EtOHcl1 | -       | Galcl1 | YPDnc1 | YPDnc2 | -      | YPDnc4 | EtOHnc1 | EtOHnc2 | Galnc1 | Galnc2 |
| 10        | YDL124W   | YPDcl2 | YPDcl3 | -       | EtOHcl2 | Galcl1 | YPDnc1 | YPDnc2 | YPDnc3 | -      | EtOHnc1 | -       | Galnc1 | Galnc2 |

|    |           |         |        |         |         |         |        |        |        |        |         |         |         |        |        |
|----|-----------|---------|--------|---------|---------|---------|--------|--------|--------|--------|---------|---------|---------|--------|--------|
| 10 | YDR194W-  | -       | YPDcl3 | -       | EtOHcl2 | Galcl1  | YPDnc1 | YPDnc2 | YPDnc3 | YPDnc4 | EtOHnc1 | -       | Galnc1  | Galnc2 |        |
| 10 | VTC1      | YER072W | -      | YPDcl3  | -       | EtOHcl2 | Galcl1 | YPDnc1 | -      | YPDnc3 | YPDnc4  | EtOHnc1 | EtOHnc2 | Galnc1 | Galnc2 |
| 10 | YLR437C-A | -       | YPDcl3 | -       | EtOHcl2 | -       | YPDnc1 | YPDnc2 | YPDnc3 | YPDnc4 | EtOHnc1 | EtOHnc2 | Galnc1  | Galnc2 |        |
| 10 | YHR045W   | YPDcl2  | -      | EtOHcl1 | EtOHcl2 | Galcl1  | YPDnc1 | -      | -      | YPDnc4 | EtOHnc1 | EtOHnc2 | Galnc1  | Galnc2 |        |
| 10 | AIM24     | YJR080C | YPDcl2 | YPDcl3  | EtOHcl1 | -       | Galcl1 | YPDnc1 | YPDnc2 | YPDnc3 | YPDnc4  | EtOHnc1 | EtOHnc2 | -      | -      |
| 10 | YER158C   | -       | YPDcl3 | EtOHcl1 | EtOHcl2 | Galcl1  | YPDnc1 | YPDnc2 | -      | YPDnc4 | EtOHnc1 | -       | Galnc1  | Galnc2 |        |
| 10 | YDR210W   | -       | -      | EtOHcl1 | -       | Galcl1  | YPDnc1 | YPDnc2 | YPDnc3 | YPDnc4 | EtOHnc1 | EtOHnc2 | Galnc1  | Galnc2 |        |
| 10 | RSC2      | YLR357W | YPDcl2 | YPDcl3  | EtOHcl1 | -       | Galcl1 | YPDnc1 | YPDnc2 | -      | YPDnc4  | EtOHnc1 | EtOHnc2 | Galnc1 | -      |
| 10 | CUR1      | YPR158W | YPDcl2 | YPDcl3  | -       | -       | -      | YPDnc1 | YPDnc2 | YPDnc3 | YPDnc4  | EtOHnc1 | EtOHnc2 | Galnc1 | Galnc2 |
| 10 | HSP150    | YJL159W | -      | -       | EtOHcl1 | -       | Galcl1 | YPDnc1 | YPDnc2 | YPDnc3 | YPDnc4  | EtOHnc1 | EtOHnc2 | Galnc1 | Galnc2 |
| 10 | UBP14     | YBR058C | YPDcl2 | YPDcl3  | EtOHcl1 | EtOHcl2 | Galcl1 | -      | YPDnc2 | YPDnc3 | YPDnc4  | -       | EtOHnc2 | -      | Galnc2 |
| 10 | PHO11     | YAR071W | YPDcl2 | -       | EtOHcl1 | EtOHcl2 | Galcl1 | YPDnc1 | YPDnc2 | YPDnc3 | YPDnc4  | -       | EtOHnc2 | Galnc1 | -      |
| 10 | ATP5      | YDR298C | YPDcl2 | YPDcl3  | -       | -       | Galcl1 | YPDnc1 | YPDnc2 | YPDnc3 | YPDnc4  | EtOHnc1 | -       | Galnc1 | Galnc2 |
| 10 | SPG5      | YMR191W | YPDcl2 | YPDcl3  | EtOHcl1 | -       | Galcl1 | YPDnc1 | YPDnc2 | -      | -       | EtOHnc1 | EtOHnc2 | Galnc1 | Galnc2 |
| 10 | COX11     | YPL132W | YPDcl2 | -       | -       | -       | Galcl1 | YPDnc1 | YPDnc2 | YPDnc3 | YPDnc4  | EtOHnc1 | EtOHnc2 | Galnc1 | Galnc2 |
| 10 | MPC54     | YOR177C | YPDcl2 | YPDcl3  | EtOHcl1 | -       | -      | YPDnc1 | YPDnc2 | YPDnc3 | YPDnc4  | EtOHnc1 | -       | Galnc1 | Galnc2 |
| 10 | YMR102C   | YPDcl2  | YPDcl3 | EtOHcl1 | EtOHcl2 | Galcl1  | -      | YPDnc2 | -      | YPDnc4 | EtOHnc1 | -       | Galnc1  | Galnc2 |        |
| 10 | YOR387C   | YPDcl2  | YPDcl3 | -       | -       | -       | YPDnc1 | YPDnc2 | YPDnc3 | YPDnc4 | EtOHnc1 | EtOHnc2 | Galnc1  | Galnc2 |        |
| 10 | YER076C   | YPDcl2  | YPDcl3 | EtOHcl1 | EtOHcl2 | Galcl1  | YPDnc1 | YPDnc2 | YPDnc3 | YPDnc4 | -       | -       | Galnc1  | -      |        |
| 10 | SSB2      | YNL209W | -      | -       | EtOHcl1 | EtOHcl2 | Galcl1 | YPDnc1 | YPDnc2 | YPDnc3 | YPDnc4  | EtOHnc1 | -       | Galnc1 | Galnc2 |
| 10 | COT1      | YOR316C | -      | -       | EtOHcl1 | -       | Galcl1 | YPDnc1 | YPDnc2 | YPDnc3 | YPDnc4  | EtOHnc1 | EtOHnc2 | Galnc1 | Galnc2 |
| 10 | YLR326W   | YPDcl2  | YPDcl3 | EtOHcl1 | -       | Galcl1  | YPDnc1 | YPDnc2 | YPDnc3 | YPDnc4 | -       | -       | Galnc1  | Galnc2 |        |
| 10 | MET17     | YLR303W | YPDcl2 | -       | EtOHcl1 | -       | Galcl1 | YPDnc1 | YPDnc2 | YPDnc3 | YPDnc4  | EtOHnc1 | -       | Galnc1 | Galnc2 |
| 10 | MSN1      | YOL116W | YPDcl2 | -       | EtOHcl1 | EtOHcl2 | Galcl1 | YPDnc1 | YPDnc2 | -      | -       | EtOHnc1 | EtOHnc2 | Galnc1 | Galnc2 |
| 10 | KIP2      | YPL155C | -      | YPDcl3  | -       | EtOHcl2 | Galcl1 | -      | YPDnc2 | YPDnc3 | YPDnc4  | EtOHnc1 | EtOHnc2 | Galnc1 | Galnc2 |
| 10 | CDC13     | YDL220C | YPDcl2 | YPDcl3  | -       | EtOHcl2 | Galcl1 | YPDnc1 | YPDnc2 | -      | YPDnc4  | -       | EtOHnc2 | Galnc1 | Galnc2 |
| 10 | YNL260C   | -       | -      | EtOHcl1 | EtOHcl2 | Galcl1  | YPDnc1 | YPDnc2 | YPDnc3 | YPDnc4 | EtOHnc1 | EtOHnc2 | Galnc1  | -      |        |
| 10 | MRPL35    | YDR322W | YPDcl2 | -       | EtOHcl1 | -       | -      | YPDnc1 | YPDnc2 | YPDnc3 | YPDnc4  | EtOHnc1 | EtOHnc2 | Galnc1 | Galnc2 |
| 10 | RPS27B    | YHR021C | -      | YPDcl3  | EtOHcl1 | -       | Galcl1 | -      | YPDnc2 | YPDnc3 | YPDnc4  | EtOHnc1 | EtOHnc2 | Galnc1 | Galnc2 |
| 10 | YGL193C   | YPDcl2  | YPDcl3 | EtOHcl1 | -       | Galcl1  | YPDnc1 | YPDnc2 | YPDnc3 | -      | EtOHnc1 | -       | Galnc1  | Galnc2 |        |
| 10 | SLZ1      | YNL196C | -      | YPDcl3  | -       | EtOHcl2 | Galcl1 | YPDnc1 | YPDnc2 | YPDnc3 | YPDnc4  | EtOHnc1 | -       | Galnc1 | Galnc2 |
| 10 | PIR1      | YKL164C | -      | -       | EtOHcl1 | EtOHcl2 | -      | YPDnc1 | YPDnc2 | YPDnc3 | YPDnc4  | EtOHnc1 | EtOHnc2 | Galnc1 | Galnc2 |
| 10 | USV1      | YPL230W | YPDcl2 | YPDcl3  | EtOHcl1 | EtOHcl2 | Galcl1 | -      | -      | YPDnc3 | -       | EtOHnc1 | EtOHnc2 | Galnc1 | Galnc2 |
| 10 | ELG1      | YOR144C | YPDcl2 | -       | EtOHcl1 | EtOHcl2 | Galcl1 | YPDnc1 | YPDnc2 | YPDnc3 | YPDnc4  | -       | EtOHnc2 | Galnc1 | -      |

|    |        |         |        |        |         |         |        |        |        |        |        |         |         |        |        |
|----|--------|---------|--------|--------|---------|---------|--------|--------|--------|--------|--------|---------|---------|--------|--------|
| 10 | SPC110 | YDR356W | YPDcl2 | -      | EtOHcl1 | -       | Galcl1 | YPDnc1 | YPDnc2 | YPDnc3 | YPDnc4 | EtOHnc1 | -       | Galnc1 | Galnc2 |
| 10 |        | YER077C | -      | YPDcl3 | EtOHcl1 | -       | Galcl1 | -      | YPDnc2 | YPDnc3 | YPDnc4 | EtOHnc1 | EtOHnc2 | Galnc1 | Galnc2 |
| 10 | DBP3   | YGL078C | YPDcl2 | -      | -       | EtOHcl2 | Galcl1 | YPDnc1 | YPDnc2 | YPDnc3 | YPDnc4 | EtOHnc1 | EtOHnc2 | Galnc1 | -      |
| 10 | OCA1   | YNL099C | YPDcl2 | YPDcl3 | -       | EtOHcl2 | Galcl1 | YPDnc1 | YPDnc2 | YPDnc3 | -      | EtOHnc1 | -       | Galnc1 | Galnc2 |
| 10 | HXT1   | YHR094C | -      | YPDcl3 | EtOHcl1 | EtOHcl2 | Galcl1 | YPDnc1 | -      | -      | YPDnc4 | EtOHnc1 | EtOHnc2 | Galnc1 | Galnc2 |
| 10 |        | YIL102C | -      | YPDcl3 | EtOHcl1 | EtOHcl2 | -      | YPDnc1 | YPDnc2 | YPDnc3 | -      | EtOHnc1 | EtOHnc2 | Galnc1 | Galnc2 |
| 10 | POL31  | YJR006W | YPDcl2 | -      | EtOHcl1 | EtOHcl2 | Galcl1 | -      | YPDnc2 | YPDnc3 | YPDnc4 | EtOHnc1 | EtOHnc2 | Galnc1 | -      |
| 10 |        | YNL195C | YPDcl2 | YPDcl3 | EtOHcl1 | -       | Galcl1 | YPDnc1 | YPDnc2 | YPDnc3 | YPDnc4 | -       | -       | Galnc1 | Galnc2 |
| 10 | YTA6   | YPL074W | YPDcl2 | YPDcl3 | EtOHcl1 | EtOHcl2 | Galcl1 | -      | YPDnc2 | YPDnc3 | YPDnc4 | -       | EtOHnc2 | -      | Galnc2 |
| 10 | IMP1   | YMR150C | -      | -      | EtOHcl1 | EtOHcl2 | Galcl1 | YPDnc1 | YPDnc2 | YPDnc3 | -      | EtOHnc1 | EtOHnc2 | Galnc1 | Galnc2 |
| 10 | PIN2   | YOR104W | YPDcl2 | YPDcl3 | EtOHcl1 | -       | Galcl1 | -      | YPDnc2 | YPDnc3 | YPDnc4 | -       | EtOHnc2 | Galnc1 | Galnc2 |
| 10 | MRPL23 | YOR150W | YPDcl2 | YPDcl3 | EtOHcl1 | EtOHcl2 | Galcl1 | YPDnc1 | -      | -      | -      | EtOHnc1 | EtOHnc2 | Galnc1 | Galnc2 |
| 10 |        | YPR153W | YPDcl2 | YPDcl3 | EtOHcl1 | EtOHcl2 | Galcl1 | -      | -      | -      | YPDnc4 | EtOHnc1 | EtOHnc2 | Galnc1 | Galnc2 |
| 10 | STH1   | YIL126W | -      | YPDcl3 | -       | EtOHcl2 | Galcl1 | YPDnc1 | YPDnc2 | YPDnc3 | YPDnc4 | EtOHnc1 | -       | Galnc1 | Galnc2 |
| 10 |        | YKL061W | YPDcl2 | YPDcl3 | EtOHcl1 | EtOHcl2 | -      | YPDnc1 | -      | -      | YPDnc4 | EtOHnc1 | EtOHnc2 | Galnc1 | Galnc2 |
| 10 |        | YDR278C | YPDcl2 | YPDcl3 | EtOHcl1 | -       | Galcl1 | -      | YPDnc2 | -      | YPDnc4 | EtOHnc1 | EtOHnc2 | Galnc1 | Galnc2 |
| 10 | NDE2   | YDL085W | YPDcl2 | YPDcl3 | EtOHcl1 | EtOHcl2 | Galcl1 | YPDnc1 | -      | -      | -      | EtOHnc1 | EtOHnc2 | Galnc1 | Galnc2 |
| 10 |        | YAR028W | -      | -      | EtOHcl1 | -       | Galcl1 | YPDnc1 | YPDnc2 | YPDnc3 | YPDnc4 | EtOHnc1 | EtOHnc2 | Galnc1 | Galnc2 |
| 10 | PAN5   | YHR063C | YPDcl2 | -      | EtOHcl1 | -       | Galcl1 | YPDnc1 | YPDnc2 | YPDnc3 | YPDnc4 | EtOHnc1 | -       | Galnc1 | Galnc2 |
| 10 |        | YDL218W | YPDcl2 | -      | EtOHcl1 | EtOHcl2 | Galcl1 | YPDnc1 | YPDnc2 | -      | YPDnc4 | EtOHnc1 | EtOHnc2 | Galnc1 | -      |
| 10 | MSL1   | YIR009W | -      | -      | EtOHcl1 | -       | Galcl1 | YPDnc1 | YPDnc2 | YPDnc3 | YPDnc4 | EtOHnc1 | EtOHnc2 | Galnc1 | Galnc2 |
| 10 | MRPS16 | YPL013C | -      | YPDcl3 | EtOHcl1 | EtOHcl2 | Galcl1 | YPDnc1 | -      | -      | YPDnc4 | EtOHnc1 | EtOHnc2 | Galnc1 | Galnc2 |
| 10 | MNN1   | YER001W | YPDcl2 | YPDcl3 | EtOHcl1 | EtOHcl2 | Galcl1 | YPDnc1 | YPDnc2 | -      | YPDnc4 | EtOHnc1 | -       | Galnc1 | -      |
| 10 | TPO1   | YLL028W | -      | YPDcl3 | EtOHcl1 | EtOHcl2 | Galcl1 | YPDnc1 | -      | -      | YPDnc4 | EtOHnc1 | EtOHnc2 | Galnc1 | Galnc2 |
| 10 | NSR1   | YGR159C | YPDcl2 | YPDcl3 | EtOHcl1 | -       | Galcl1 | -      | YPDnc2 | YPDnc3 | YPDnc4 | EtOHnc1 | EtOHnc2 | -      | Galnc2 |
| 10 | HUG1   | YML058W | -      | -      | EtOHcl1 | EtOHcl2 | Galcl1 | YPDnc1 | YPDnc2 | YPDnc3 | YPDnc4 | EtOHnc1 | EtOHnc2 | -      | Galnc2 |
| 10 | PFA4   | YOL003C | YPDcl2 | YPDcl3 | EtOHcl1 | EtOHcl2 | Galcl1 | -      | YPDnc2 | -      | YPDnc4 | -       | EtOHnc2 | Galnc1 | Galnc2 |
| 10 | PEX10  | YDR265W | -      | -      | EtOHcl1 | EtOHcl2 | -      | YPDnc1 | YPDnc2 | YPDnc3 | YPDnc4 | EtOHnc1 | EtOHnc2 | Galnc1 | Galnc2 |
| 10 |        | YFL015C | YPDcl2 | YPDcl3 | -       | EtOHcl2 | Galcl1 | YPDnc1 | YPDnc2 | YPDnc3 | -      | EtOHnc1 | -       | Galnc1 | Galnc2 |
| 10 | PSY4   | YBL046W | YPDcl2 | -      | EtOHcl1 | EtOHcl2 | -      | YPDnc1 | YPDnc2 | YPDnc3 | YPDnc4 | EtOHnc1 | -       | Galnc1 | Galnc2 |
| 10 | PHO23  | YNL097C | -      | YPDcl3 | EtOHcl1 | EtOHcl2 | Galcl1 | -      | YPDnc2 | YPDnc3 | YPDnc4 | EtOHnc1 | EtOHnc2 | Galnc1 | -      |
| 10 |        | YMR259C | YPDcl2 | YPDcl3 | EtOHcl1 | EtOHcl2 | Galcl1 | -      | YPDnc2 | YPDnc3 | -      | EtOHnc1 | EtOHnc2 | Galnc1 | -      |
| 10 | VPS62  | YGR141W | YPDcl2 | YPDcl3 | EtOHcl1 | EtOHcl2 | Galcl1 | YPDnc1 | -      | -      | -      | EtOHnc1 | EtOHnc2 | Galnc1 | Galnc2 |
| 10 |        | YNL205C | -      | -      | EtOHcl1 | -       | Galcl1 | YPDnc1 | YPDnc2 | YPDnc3 | YPDnc4 | EtOHnc1 | EtOHnc2 | Galnc1 | Galnc2 |



|    |       |           |        |        |         |         |        |        |        |        |        |         |         |        |        |
|----|-------|-----------|--------|--------|---------|---------|--------|--------|--------|--------|--------|---------|---------|--------|--------|
| 10 | RAD10 | YML095C   | YPDcl2 | YPDcl3 | EtOHcl1 | EtOHcl2 | Galcl1 | -      | YPDnc2 | YPDnc3 | YPDnc4 | -       | EtOHnc2 | Galnc1 | -      |
| 10 | ARG82 | YDR173C   | YPDcl2 | YPDcl3 | EtOHcl1 | -       | Galcl1 | YPDnc1 | YPDnc2 | YPDnc3 | -      | -       | EtOHnc2 | Galnc1 | Galnc2 |
| 10 | IMD3  | YLR432W   | -      | -      | EtOHcl1 | EtOHcl2 | Galcl1 | YPDnc1 | YPDnc2 | YPDnc3 | YPDnc4 | EtOHnc1 | -       | Galnc1 | Galnc2 |
| 10 | FMP37 | YGL080W   | YPDcl2 | YPDcl3 | EtOHcl1 | EtOHcl2 | Galcl1 | -      | YPDnc2 | YPDnc3 | -      | EtOHnc1 | EtOHnc2 | Galnc1 | -      |
| 10 | RGA2  | YDR379W   | YPDcl2 | YPDcl3 | EtOHcl1 | -       | Galcl1 | YPDnc1 | YPDnc2 | YPDnc3 | YPDnc4 | -       | EtOHnc2 | -      | Galnc2 |
| 10 | FLC1  | YPL221W   | YPDcl2 | -      | EtOHcl1 | -       | Galcl1 | YPDnc1 | YPDnc2 | YPDnc3 | YPDnc4 | EtOHnc1 | EtOHnc2 | Galnc1 | -      |
| 10 | ZDS2  | YML109W   | YPDcl2 | YPDcl3 | EtOHcl1 | EtOHcl2 | Galcl1 | -      | -      | YPDnc3 | YPDnc4 | EtOHnc1 | -       | Galnc1 | Galnc2 |
| 10 | MSS4  | YDR208W   | YPDcl2 | YPDcl3 | EtOHcl1 | EtOHcl2 | -      | YPDnc1 | YPDnc2 | YPDnc3 | -      | -       | EtOHnc2 | Galnc1 | Galnc2 |
| 10 | ENT1  | YDL161W   | YPDcl2 | -      | EtOHcl1 | -       | Galcl1 | YPDnc1 | -      | YPDnc3 | YPDnc4 | EtOHnc1 | EtOHnc2 | Galnc1 | Galnc2 |
| 10 | OTU2  | YHL013C   | YPDcl2 | YPDcl3 | EtOHcl1 | EtOHcl2 | Galcl1 | -      | YPDnc2 | YPDnc3 | YPDnc4 | -       | EtOHnc2 | Galnc1 | -      |
| 10 |       | YIL030W-A | YPDcl2 | -      | EtOHcl1 | EtOHcl2 | -      | YPDnc1 | YPDnc2 | -      | YPDnc4 | EtOHnc1 | EtOHnc2 | Galnc1 | Galnc2 |
| 10 |       | YJL077W-B | -      | -      | EtOHcl1 | EtOHcl2 | -      | YPDnc1 | YPDnc2 | YPDnc3 | YPDnc4 | EtOHnc1 | EtOHnc2 | Galnc1 | Galnc2 |
| 10 |       | YLR057W   | -      | YPDcl3 | -       | -       | Galcl1 | YPDnc1 | YPDnc2 | YPDnc3 | YPDnc4 | EtOHnc1 | EtOHnc2 | Galnc1 | Galnc2 |
| 10 | RUD3  | YOR216C   | -      | -      | EtOHcl1 | EtOHcl2 | Galcl1 | YPDnc1 | YPDnc2 | YPDnc3 | -      | EtOHnc1 | EtOHnc2 | Galnc1 | Galnc2 |
| 10 | RRB1  | YMR131C   | YPDcl2 | -      | -       | EtOHcl2 | Galcl1 | YPDnc1 | YPDnc2 | YPDnc3 | YPDnc4 | EtOHnc1 | -       | Galnc1 | Galnc2 |
| 10 | HAP5  | YOR358W   | -      | -      | EtOHcl1 | EtOHcl2 | -      | YPDnc1 | YPDnc2 | YPDnc3 | YPDnc4 | EtOHnc1 | EtOHnc2 | Galnc1 | Galnc2 |
| 10 |       | YBR296C-A | YPDcl2 | YPDcl3 | EtOHcl1 | -       | -      | YPDnc1 | YPDnc2 | YPDnc3 | YPDnc4 | EtOHnc1 | -       | Galnc1 | Galnc2 |
| 10 | MAL33 | YBR297W   | YPDcl2 | YPDcl3 | -       | -       | -      | YPDnc1 | YPDnc2 | YPDnc3 | YPDnc4 | EtOHnc1 | EtOHnc2 | Galnc1 | Galnc2 |
| 10 | MCM1  | YMR043W   | YPDcl2 | YPDcl3 | -       | EtOHcl2 | Galcl1 | YPDnc1 | -      | YPDnc3 | YPDnc4 | EtOHnc1 | -       | Galnc1 | Galnc2 |
| 10 |       | YER091C-A | -      | -      | EtOHcl1 | -       | Galcl1 | YPDnc1 | YPDnc2 | YPDnc3 | YPDnc4 | EtOHnc1 | EtOHnc2 | Galnc1 | Galnc2 |
| 10 | COX5A | YNL052W   | YPDcl2 | YPDcl3 | EtOHcl1 | EtOHcl2 | Galcl1 | -      | YPDnc2 | YPDnc3 | YPDnc4 | -       | EtOHnc2 | Galnc1 | -      |
| 10 |       | YIR035C   | -      | -      | EtOHcl1 | EtOHcl2 | -      | YPDnc1 | YPDnc2 | YPDnc3 | YPDnc4 | EtOHnc1 | EtOHnc2 | Galnc1 | Galnc2 |
| 10 | TSR2  | YLR435W   | -      | -      | EtOHcl1 | EtOHcl2 | -      | YPDnc1 | YPDnc2 | YPDnc3 | YPDnc4 | EtOHnc1 | EtOHnc2 | Galnc1 | Galnc2 |
| 10 |       | YLR108C   | YPDcl2 | YPDcl3 | EtOHcl1 | -       | Galcl1 | YPDnc1 | -      | -      | YPDnc4 | EtOHnc1 | EtOHnc2 | Galnc1 | Galnc2 |
| 10 | RPS13 | YDR064W   | YPDcl2 | -      | EtOHcl1 | -       | Galcl1 | YPDnc1 | YPDnc2 | YPDnc3 | YPDnc4 | EtOHnc1 | -       | Galnc1 | Galnc2 |
| 10 |       | YKL071W   | -      | YPDcl3 | EtOHcl1 | EtOHcl2 | Galcl1 | YPDnc1 | YPDnc2 | YPDnc3 | -      | EtOHnc1 | -       | Galnc1 | Galnc2 |
| 10 | DAL80 | YKR034W   | YPDcl2 | YPDcl3 | -       | -       | Galcl1 | YPDnc1 | YPDnc2 | YPDnc3 | YPDnc4 | EtOHnc1 | -       | Galnc1 | Galnc2 |
| 10 |       | YCR013C   | YPDcl2 | YPDcl3 | EtOHcl1 | EtOHcl2 | Galcl1 | YPDnc1 | YPDnc2 | YPDnc3 | -      | -       | EtOHnc2 | -      | Galnc2 |
| 10 | ECM32 | YER176W   | -      | YPDcl3 | EtOHcl1 | EtOHcl2 | Galcl1 | YPDnc1 | -      | -      | YPDnc4 | EtOHnc1 | EtOHnc2 | Galnc1 | Galnc2 |
| 10 | LCB5  | YLR260W   | -      | -      | EtOHcl1 | -       | Galcl1 | YPDnc1 | YPDnc2 | YPDnc3 | YPDnc4 | EtOHnc1 | EtOHnc2 | Galnc1 | Galnc2 |
| 10 | TCB1  | YOR086C   | YPDcl2 | -      | -       | -       | Galcl1 | YPDnc1 | YPDnc2 | YPDnc3 | YPDnc4 | EtOHnc1 | EtOHnc2 | Galnc1 | Galnc2 |
| 10 | RRP15 | YPR143W   | -      | -      | EtOHcl1 | -       | Galcl1 | YPDnc1 | YPDnc2 | YPDnc3 | YPDnc4 | EtOHnc1 | EtOHnc2 | Galnc1 | Galnc2 |
| 10 | COG3  | YER157W   | -      | YPDcl3 | EtOHcl1 | EtOHcl2 | Galcl1 | YPDnc1 | YPDnc2 | -      | YPDnc4 | EtOHnc1 | -       | Galnc1 | Galnc2 |
| 10 | MSB4  | YOL112W   | YPDcl2 | -      | EtOHcl1 | EtOHcl2 | Galcl1 | YPDnc1 | YPDnc2 | YPDnc3 | -      | EtOHnc1 | -       | Galnc1 | Galnc2 |

|    |        |            |        |        |         |         |        |        |        |        |        |         |         |        |        |
|----|--------|------------|--------|--------|---------|---------|--------|--------|--------|--------|--------|---------|---------|--------|--------|
| 10 | ERG29  | YMR134W    | YPDcl2 | -      | -       | -       | Galcl1 | YPDnc1 | YPDnc2 | YPDnc3 | YPDnc4 | EtOHnc1 | EtOHnc2 | Galnc1 | Galnc2 |
| 10 | PHO87  | YCR037C    | -      | YPDcl3 | EtOHcl1 | EtOHcl2 | Galcl1 | YPDnc1 | -      | -      | YPDnc4 | EtOHnc1 | EtOHnc2 | Galnc1 | Galnc2 |
| 10 | ECM31  | YBR176W    | YPDcl2 | -      | EtOHcl1 | -       | -      | YPDnc1 | YPDnc2 | YPDnc3 | YPDnc4 | EtOHnc1 | EtOHnc2 | Galnc1 | Galnc2 |
| 10 |        | YPR076W    | -      | -      | EtOHcl1 | EtOHcl2 | Galcl1 | YPDnc1 | YPDnc2 | -      | YPDnc4 | EtOHnc1 | EtOHnc2 | Galnc1 | Galnc2 |
| 10 |        | YMR057C    | -      | YPDcl3 | EtOHcl1 | -       | -      | YPDnc1 | YPDnc2 | YPDnc3 | YPDnc4 | EtOHnc1 | EtOHnc2 | Galnc1 | Galnc2 |
| 10 | YNK1   | YKL067W    | YPDcl2 | YPDcl3 | -       | -       | Galcl1 | YPDnc1 | YPDnc2 | YPDnc3 | YPDnc4 | EtOHnc1 | -       | Galnc1 | Galnc2 |
| 10 | RPS9A  | YPL081W    | -      | -      | EtOHcl1 | EtOHcl2 | -      | YPDnc1 | YPDnc2 | YPDnc3 | YPDnc4 | EtOHnc1 | EtOHnc2 | Galnc1 | Galnc2 |
| 10 | EXG2   | YDR261C    | -      | -      | -       | EtOHcl2 | Galcl1 | YPDnc1 | YPDnc2 | YPDnc3 | YPDnc4 | EtOHnc1 | EtOHnc2 | Galnc1 | Galnc2 |
| 10 | NSE3   | YDR288W    | -      | -      | EtOHcl1 | -       | Galcl1 | YPDnc1 | YPDnc2 | YPDnc3 | YPDnc4 | EtOHnc1 | EtOHnc2 | Galnc1 | Galnc2 |
| 10 | NFT1   | YKR103W    | -      | -      | EtOHcl1 | -       | Galcl1 | YPDnc1 | YPDnc2 | YPDnc3 | YPDnc4 | EtOHnc1 | EtOHnc2 | Galnc1 | Galnc2 |
| 10 |        | YJL032W    | YPDcl2 | YPDcl3 | EtOHcl1 | EtOHcl2 | Galcl1 | -      | YPDnc2 | -      | YPDnc4 | EtOHnc1 | EtOHnc2 | Galnc1 | -      |
| 10 | SMA1   | YPL027W    | -      | -      | EtOHcl1 | -       | Galcl1 | YPDnc1 | YPDnc2 | YPDnc3 | YPDnc4 | EtOHnc1 | EtOHnc2 | Galnc1 | Galnc2 |
| 10 | NCA2   | YPR155C    | -      | YPDcl3 | EtOHcl1 | -       | Galcl1 | YPDnc1 | YPDnc2 | -      | YPDnc4 | EtOHnc1 | EtOHnc2 | Galnc1 | Galnc2 |
| 10 | PET8   | YNL003C    | YPDcl2 | YPDcl3 | EtOHcl1 | EtOHcl2 | Galcl1 | -      | YPDnc2 | YPDnc3 | -      | EtOHnc1 | EtOHnc2 | -      | Galnc2 |
| 10 | GET3   | YDL100C    | YPDcl2 | YPDcl3 | EtOHcl1 | EtOHcl2 | Galcl1 | YPDnc1 | YPDnc2 | -      | -      | EtOHnc1 | -       | Galnc1 | Galnc2 |
| 10 | PAA1   | YDR071C    | YPDcl2 | -      | EtOHcl1 | EtOHcl2 | Galcl1 | YPDnc1 | YPDnc2 | YPDnc3 | -      | EtOHnc1 | -       | Galnc1 | Galnc2 |
| 10 |        | YFR034W-/- | -      | YPDcl3 | -       | EtOHcl2 | Galcl1 | YPDnc1 | YPDnc2 | -      | YPDnc4 | EtOHnc1 | EtOHnc2 | Galnc1 | Galnc2 |
| 10 |        | YDL022C-A  | -      | YPDcl3 | EtOHcl1 | EtOHcl2 | Galcl1 | -      | YPDnc2 | YPDnc3 | -      | EtOHnc1 | EtOHnc2 | Galnc1 | Galnc2 |
| 10 | SUR2   | YDR297W    | YPDcl2 | YPDcl3 | -       | -       | Galcl1 | YPDnc1 | YPDnc2 | YPDnc3 | YPDnc4 | EtOHnc1 | -       | Galnc1 | Galnc2 |
| 10 |        | YCR001W    | YPDcl2 | -      | EtOHcl1 | -       | Galcl1 | -      | YPDnc2 | YPDnc3 | YPDnc4 | EtOHnc1 | EtOHnc2 | Galnc1 | Galnc2 |
| 10 | YEN1   | YER041W    | YPDcl2 | YPDcl3 | EtOHcl1 | EtOHcl2 | Galcl1 | -      | YPDnc2 | YPDnc3 | YPDnc4 | -       | EtOHnc2 | -      | Galnc2 |
| 10 | STE24  | YJR117W    | YPDcl2 | -      | EtOHcl1 | EtOHcl2 | Galcl1 | -      | YPDnc2 | YPDnc3 | -      | EtOHnc1 | EtOHnc2 | Galnc1 | Galnc2 |
| 10 | RTT103 | YDR289C    | YPDcl2 | YPDcl3 | EtOHcl1 | -       | Galcl1 | -      | YPDnc2 | YPDnc3 | YPDnc4 | -       | EtOHnc2 | Galnc1 | Galnc2 |
| 10 | MPS1   | YDL028C    | YPDcl2 | YPDcl3 | -       | EtOHcl2 | Galcl1 | -      | YPDnc2 | YPDnc3 | YPDnc4 | EtOHnc1 | EtOHnc2 | Galnc1 | -      |
| 10 | CIN8   | YEL061C    | -      | YPDcl3 | EtOHcl1 | -       | -      | YPDnc1 | YPDnc2 | YPDnc3 | YPDnc4 | EtOHnc1 | EtOHnc2 | Galnc1 | Galnc2 |
| 10 | RRT15  | YLR162W-/- | YPDcl2 | YPDcl3 | EtOHcl1 | EtOHcl2 | Galcl1 | YPDnc1 | -      | YPDnc3 | -      | EtOHnc1 | EtOHnc2 | Galnc1 | -      |
| 10 | HSP26  | YBR072W    | YPDcl2 | YPDcl3 | -       | EtOHcl2 | Galcl1 | YPDnc1 | YPDnc2 | YPDnc3 | YPDnc4 | -       | -       | Galnc1 | Galnc2 |
| 10 |        | YHR180C-B  | YPDcl2 | YPDcl3 | EtOHcl1 | EtOHcl2 | Galcl1 | -      | YPDnc2 | -      | YPDnc4 | EtOHnc1 | EtOHnc2 | -      | Galnc2 |
| 10 | TGL1   | YKL140W    | YPDcl2 | YPDcl3 | EtOHcl1 | EtOHcl2 | Galcl1 | YPDnc1 | -      | -      | YPDnc4 | EtOHnc1 | -       | Galnc1 | Galnc2 |
| 10 |        | YLR402W    | YPDcl2 | -      | EtOHcl1 | EtOHcl2 | Galcl1 | YPDnc1 | YPDnc2 | -      | YPDnc4 | EtOHnc1 | -       | Galnc1 | Galnc2 |
| 10 | SMX3   | YPR182W    | -      | YPDcl3 | EtOHcl1 | EtOHcl2 | Galcl1 | YPDnc1 | -      | YPDnc3 | -      | EtOHnc1 | EtOHnc2 | Galnc1 | Galnc2 |
| 10 | RRN10  | YBL025W    | -      | -      | -       | EtOHcl2 | Galcl1 | YPDnc1 | YPDnc2 | YPDnc3 | YPDnc4 | EtOHnc1 | EtOHnc2 | Galnc1 | Galnc2 |
| 10 | SHE1   | YBL031W    | -      | YPDcl3 | EtOHcl1 | -       | -      | YPDnc1 | YPDnc2 | YPDnc3 | YPDnc4 | EtOHnc1 | EtOHnc2 | Galnc1 | Galnc2 |
| 10 | ALP1   | YNL270C    | -      | -      | EtOHcl1 | -       | Galcl1 | YPDnc1 | YPDnc2 | YPDnc3 | YPDnc4 | EtOHnc1 | EtOHnc2 | Galnc1 | Galnc2 |

|    |        |           |        |        |         |         |        |        |        |        |        |         |         |        |        |
|----|--------|-----------|--------|--------|---------|---------|--------|--------|--------|--------|--------|---------|---------|--------|--------|
| 10 | NUP133 | YKR082W   | YPDcl2 | YPDcl3 | EtOHcl1 | EtOHcl2 | Galcl1 | -      | YPDnc2 | YPDnc3 | YPDnc4 | -       | EtOHnc2 | Galnc1 | -      |
| 10 | MND1   | YGL183C   | YPDcl2 | YPDcl3 | -       | EtOHcl2 | Galcl1 | YPDnc1 | YPDnc2 | YPDnc3 | YPDnc4 | EtOHnc1 | -       | Galnc1 | -      |
| 10 |        | YMR103C   | YPDcl2 | YPDcl3 | -       | -       | Galcl1 | YPDnc1 | YPDnc2 | -      | YPDnc4 | EtOHnc1 | EtOHnc2 | Galnc1 | Galnc2 |
| 10 | NGR1   | YBR212W   | YPDcl2 | -      | -       | -       | Galcl1 | YPDnc1 | YPDnc2 | YPDnc3 | YPDnc4 | EtOHnc1 | EtOHnc2 | Galnc1 | Galnc2 |
| 10 | MLC1   | YGL106W   | YPDcl2 | YPDcl3 | EtOHcl1 | EtOHcl2 | -      | YPDnc1 | YPDnc2 | YPDnc3 | -      | EtOHnc1 | -       | Galnc1 | Galnc2 |
| 10 | CDC31  | YOR257W   | YPDcl2 | YPDcl3 | EtOHcl1 | EtOHcl2 | Galcl1 | -      | YPDnc2 | YPDnc3 | YPDnc4 | -       | EtOHnc2 | Galnc1 | -      |
| 10 | OPY2   | YPR075C   | -      | -      | EtOHcl1 | EtOHcl2 | Galcl1 | YPDnc1 | YPDnc2 | -      | YPDnc4 | EtOHnc1 | EtOHnc2 | Galnc1 | Galnc2 |
| 10 | TAF12  | YDR145W   | YPDcl2 | YPDcl3 | EtOHcl1 | EtOHcl2 | Galcl1 | YPDnc1 | -      | YPDnc3 | YPDnc4 | EtOHnc1 | -       | Galnc1 | -      |
| 10 |        | YLR412C-A | -      | -      | EtOHcl1 | EtOHcl2 | Galcl1 | YPDnc1 | -      | YPDnc3 | YPDnc4 | EtOHnc1 | EtOHnc2 | Galnc1 | Galnc2 |
| 10 | PHO81  | YGR233C   | -      | YPDcl3 | EtOHcl1 | -       | -      | YPDnc1 | YPDnc2 | YPDnc3 | YPDnc4 | EtOHnc1 | EtOHnc2 | Galnc1 | Galnc2 |
| 10 | HXT10  | YFL011W   | YPDcl2 | YPDcl3 | EtOHcl1 | EtOHcl2 | Galcl1 | -      | YPDnc2 | YPDnc3 | YPDnc4 | -       | EtOHnc2 | Galnc1 | -      |
| 10 | YKE2   | YLR200W   | -      | YPDcl3 | -       | -       | Galcl1 | YPDnc1 | YPDnc2 | YPDnc3 | YPDnc4 | EtOHnc1 | EtOHnc2 | Galnc1 | Galnc2 |
| 10 | YOX1   | YML027W   | YPDcl2 | -      | -       | EtOHcl2 | -      | YPDnc1 | YPDnc2 | YPDnc3 | YPDnc4 | EtOHnc1 | EtOHnc2 | Galnc1 | Galnc2 |
| 10 |        | YPL114W   | -      | YPDcl3 | EtOHcl1 | -       | Galcl1 | YPDnc1 | YPDnc2 | YPDnc3 | -      | EtOHnc1 | EtOHnc2 | Galnc1 | Galnc2 |
| 10 |        | YBR226C   | -      | YPDcl3 | EtOHcl1 | EtOHcl2 | Galcl1 | YPDnc1 | -      | -      | YPDnc4 | EtOHnc1 | EtOHnc2 | Galnc1 | Galnc2 |
| 10 |        | YOR292C   | -      | -      | EtOHcl1 | -       | Galcl1 | YPDnc1 | YPDnc2 | YPDnc3 | YPDnc4 | EtOHnc1 | EtOHnc2 | Galnc1 | Galnc2 |
| 10 | IQG1   | YPL242C   | YPDcl2 | YPDcl3 | -       | -       | Galcl1 | YPDnc1 | YPDnc2 | YPDnc3 | YPDnc4 | -       | EtOHnc2 | Galnc1 | Galnc2 |
| 10 | VPH2   | YKL119C   | YPDcl2 | YPDcl3 | EtOHcl1 | EtOHcl2 | Galcl1 | -      | -      | -      | YPDnc4 | EtOHnc1 | EtOHnc2 | Galnc1 | Galnc2 |
| 10 | FAL1   | YDR021W   | YPDcl2 | YPDcl3 | EtOHcl1 | EtOHcl2 | Galcl1 | -      | YPDnc2 | YPDnc3 | YPDnc4 | -       | EtOHnc2 | Galnc1 | -      |
| 10 | RAD5   | YLR032W   | -      | -      | -       | EtOHcl2 | Galcl1 | YPDnc1 | YPDnc2 | YPDnc3 | YPDnc4 | EtOHnc1 | EtOHnc2 | Galnc1 | Galnc2 |
| 10 | HSP10  | YOR020C   | YPDcl2 | -      | -       | EtOHcl2 | Galcl1 | YPDnc1 | YPDnc2 | YPDnc3 | -      | EtOHnc1 | EtOHnc2 | Galnc1 | Galnc2 |
| 9  |        | YCR061W   | -      | -      | EtOHcl1 | -       | -      | YPDnc1 | YPDnc2 | YPDnc3 | YPDnc4 | EtOHnc1 | EtOHnc2 | Galnc1 | Galnc2 |
| 9  | TIP1   | YBR067C   | -      | -      | EtOHcl1 | EtOHcl2 | -      | YPDnc1 | YPDnc2 | YPDnc3 | YPDnc4 | EtOHnc1 | -       | Galnc1 | Galnc2 |
| 9  | BUB3   | YOR026W   | -      | YPDcl3 | EtOHcl1 | EtOHcl2 | Galcl1 | YPDnc1 | -      | -      | -      | EtOHnc1 | EtOHnc2 | Galnc1 | Galnc2 |
| 9  | OAR1   | YKL055C   | -      | YPDcl3 | EtOHcl1 | -       | -      | YPDnc1 | YPDnc2 | YPDnc3 | -      | EtOHnc1 | EtOHnc2 | Galnc1 | Galnc2 |
| 9  | MCM4   | YPR019W   | YPDcl2 | -      | -       | -       | Galcl1 | YPDnc1 | YPDnc2 | YPDnc3 | YPDnc4 | EtOHnc1 | EtOHnc2 | Galnc1 | -      |
| 9  |        | YPL014W   | -      | YPDcl3 | -       | -       | Galcl1 | YPDnc1 | -      | YPDnc3 | YPDnc4 | EtOHnc1 | EtOHnc2 | Galnc1 | Galnc2 |
| 9  |        | YER119C-A | YPDcl2 | -      | EtOHcl1 | -       | -      | YPDnc1 | YPDnc2 | YPDnc3 | YPDnc4 | EtOHnc1 | -       | Galnc1 | Galnc2 |
| 9  | TOM40  | YMR203W   | YPDcl2 | YPDcl3 | EtOHcl1 | EtOHcl2 | Galcl1 | -      | -      | -      | YPDnc4 | EtOHnc1 | EtOHnc2 | -      | Galnc2 |
| 9  | TRL1   | YJL087C   | YPDcl2 | YPDcl3 | EtOHcl1 | EtOHcl2 | Galcl1 | -      | YPDnc2 | YPDnc3 | YPDnc4 | -       | EtOHnc2 | -      | -      |
| 9  | PRE8   | YML092C   | -      | YPDcl3 | EtOHcl1 | EtOHcl2 | Galcl1 | YPDnc1 | YPDnc2 | YPDnc3 | YPDnc4 | EtOHnc1 | -       | -      | -      |
| 9  | GNA1   | YFL017C   | YPDcl2 | YPDcl3 | EtOHcl1 | EtOHcl2 | Galcl1 | -      | -      | -      | -      | EtOHnc1 | EtOHnc2 | Galnc1 | Galnc2 |
| 9  |        | YMR086C-  | YPDcl2 | -      | EtOHcl1 | -       | Galcl1 | YPDnc1 | YPDnc2 | YPDnc3 | YPDnc4 | -       | -       | Galnc1 | Galnc2 |
| 9  | RGS2   | YOR107W   | -      | -      | -       | EtOHcl2 | Galcl1 | YPDnc1 | YPDnc2 | YPDnc3 | -      | EtOHnc1 | EtOHnc2 | Galnc1 | Galnc2 |

|   |         |         |        |        |         |         |        |        |        |        |         |         |         |        |
|---|---------|---------|--------|--------|---------|---------|--------|--------|--------|--------|---------|---------|---------|--------|
| 9 | YLR012C | YPDcl2  | YPDcl3 | -      | -       | Galcl1  | -      | YPDnc2 | YPDnc3 | YPDnc4 | EtOHnc1 | EtOHnc2 | Galnc1  | -      |
| 9 | IES1    | YFL013C | YPDcl2 | YPDcl3 | EtOHcl1 | EtOHcl2 | Galcl1 | -      | YPDnc2 | YPDnc3 | YPDnc4  | -       | EtOHnc2 | -      |
| 9 | ECM13   | YBL043W | -      | -      | -       | EtOHcl2 | Galcl1 | YPDnc1 | YPDnc2 | YPDnc3 | YPDnc4  | EtOHnc1 | EtOHnc2 | Galnc1 |
| 9 | HRK1    | YOR267C | -      | YPDcl3 | EtOHcl1 | -       | Galcl1 | YPDnc1 | YPDnc2 | -      | YPDnc4  | EtOHnc1 | -       | Galnc1 |
| 9 | DIA1    | YMR316W | -      | -      | EtOHcl1 | -       | Galcl1 | YPDnc1 | YPDnc2 | YPDnc3 | -       | EtOHnc1 | EtOHnc2 | Galnc1 |
| 9 | UPF3    | YGR072W | -      | -      | EtOHcl1 | EtOHcl2 | Galcl1 | YPDnc1 | YPDnc2 | YPDnc3 | YPDnc4  | -       | EtOHnc2 | Galnc2 |
| 9 | MDE1    | YJR024C | YPDcl2 | YPDcl3 | -       | -       | Galcl1 | YPDnc1 | -      | -      | YPDnc4  | EtOHnc1 | EtOHnc2 | Galnc1 |
| 9 | FEN2    | YCR028C | YPDcl2 | -      | EtOHcl1 | -       | Galcl1 | YPDnc1 | YPDnc2 | YPDnc3 | YPDnc4  | -       | EtOHnc2 | Galnc2 |
| 9 | KAR2    | YJL034W | -      | -      | -       | EtOHcl2 | Galcl1 | YPDnc1 | YPDnc2 | YPDnc3 | -       | EtOHnc1 | EtOHnc2 | Galnc1 |
| 9 | SRP40   | YKR092C | YPDcl2 | -      | EtOHcl1 | -       | Galcl1 | YPDnc1 | YPDnc2 | -      | YPDnc4  | EtOHnc1 | -       | Galnc1 |
| 9 | FUN14   | YAL008W | YPDcl2 | YPDcl3 | EtOHcl1 | EtOHcl2 | Galcl1 | YPDnc1 | -      | -      | -       | EtOHnc1 | EtOHnc2 | Galnc1 |
| 9 | ULP1    | YPL020C | YPDcl2 | YPDcl3 | EtOHcl1 | -       | -      | YPDnc1 | -      | -      | YPDnc4  | EtOHnc1 | EtOHnc2 | Galnc1 |
| 9 | MSP1    | YGR028W | YPDcl2 | YPDcl3 | -       | EtOHcl2 | Galcl1 | YPDnc1 | -      | -      | YPDnc4  | EtOHnc1 | EtOHnc2 | Galnc2 |
| 9 | ARP1    | YHR129C | YPDcl2 | YPDcl3 | EtOHcl1 | EtOHcl2 | Galcl1 | -      | YPDnc2 | YPDnc3 | YPDnc4  | -       | EtOHnc2 | -      |
| 9 | LYP1    | YNL268W | -      | -      | EtOHcl1 | EtOHcl2 | Galcl1 | YPDnc1 | -      | YPDnc3 | -       | EtOHnc1 | EtOHnc2 | Galnc1 |
| 9 |         | YOR345C | -      | -      | EtOHcl1 | -       | Galcl1 | YPDnc1 | YPDnc2 | YPDnc3 | -       | EtOHnc1 | EtOHnc2 | Galnc1 |
| 9 | FYV6    | YNL133C | -      | -      | EtOHcl1 | EtOHcl2 | Galcl1 | YPDnc1 | -      | YPDnc3 | -       | EtOHnc1 | EtOHnc2 | Galnc1 |
| 9 | SES1    | YDR023W | -      | -      | EtOHcl1 | -       | -      | YPDnc1 | YPDnc2 | YPDnc3 | YPDnc4  | EtOHnc1 | EtOHnc2 | Galnc1 |
| 9 | SPG3    | YDR504C | -      | -      | EtOHcl1 | -       | Galcl1 | YPDnc1 | YPDnc2 | -      | YPDnc4  | EtOHnc1 | EtOHnc2 | Galnc1 |
| 9 | PSY1    | YKL076C | -      | -      | EtOHcl1 | -       | -      | YPDnc1 | YPDnc2 | YPDnc3 | YPDnc4  | EtOHnc1 | EtOHnc2 | Galnc1 |
| 9 |         | YMR119W | -      | YPDcl3 | EtOHcl1 | EtOHcl2 | Galcl1 | YPDnc1 | -      | -      | -       | EtOHnc1 | EtOHnc2 | Galnc1 |
| 9 |         | YFR035C | YPDcl2 | YPDcl3 | -       | -       | -      | YPDnc1 | YPDnc2 | -      | YPDnc4  | EtOHnc1 | EtOHnc2 | Galnc1 |
| 9 | MRM2    | YGL136C | YPDcl2 | YPDcl3 | -       | EtOHcl2 | -      | YPDnc1 | YPDnc2 | -      | YPDnc4  | EtOHnc1 | EtOHnc2 | Galnc2 |
| 9 | MGM101  | YJR144W | -      | -      | EtOHcl1 | EtOHcl2 | -      | YPDnc1 | -      | YPDnc3 | YPDnc4  | EtOHnc1 | EtOHnc2 | Galnc1 |
| 9 | ENP2    | YGR145W | YPDcl2 | -      | -       | -       | Galcl1 | -      | YPDnc2 | YPDnc3 | YPDnc4  | EtOHnc1 | EtOHnc2 | Galnc1 |
| 9 |         | YCR095W | YPDcl2 | -      | EtOHcl1 | -       | -      | -      | YPDnc2 | YPDnc3 | YPDnc4  | EtOHnc1 | EtOHnc2 | Galnc1 |
| 9 |         | YMR210W | -      | -      | EtOHcl1 | -       | Galcl1 | YPDnc1 | YPDnc2 | YPDnc3 | -       | EtOHnc1 | EtOHnc2 | Galnc1 |
| 9 | DIC1    | YLR348C | -      | YPDcl3 | EtOHcl1 | EtOHcl2 | Galcl1 | YPDnc1 | -      | YPDnc3 | -       | EtOHnc1 | EtOHnc2 | Galnc2 |
| 9 | RCK1    | YGL158W | -      | -      | EtOHcl1 | EtOHcl2 | Galcl1 | YPDnc1 | YPDnc2 | -      | -       | EtOHnc1 | EtOHnc2 | Galnc1 |
| 9 | RPC19   | YNL113W | -      | -      | EtOHcl1 | -       | Galcl1 | YPDnc1 | YPDnc2 | YPDnc3 | -       | EtOHnc1 | EtOHnc2 | Galnc1 |
| 9 | PDR12   | YPL058C | -      | -      | EtOHcl1 | -       | Galcl1 | YPDnc1 | YPDnc2 | YPDnc3 | -       | EtOHnc1 | EtOHnc2 | Galnc1 |
| 9 | PAB1    | YER165W | -      | YPDcl3 | EtOHcl1 | EtOHcl2 | Galcl1 | -      | YPDnc2 | YPDnc3 | YPDnc4  | -       | EtOHnc2 | Galnc1 |
| 9 | TMA10   | YLR327C | -      | -      | EtOHcl1 | -       | Galcl1 | YPDnc1 | YPDnc2 | YPDnc3 | YPDnc4  | EtOHnc1 | -       | Galnc1 |
| 9 |         | YOR139C | -      | -      | EtOHcl1 | -       | -      | YPDnc1 | YPDnc2 | YPDnc3 | YPDnc4  | EtOHnc1 | EtOHnc2 | Galnc1 |

|   |        |           |        |        |         |         |        |        |        |        |        |         |         |        |        |
|---|--------|-----------|--------|--------|---------|---------|--------|--------|--------|--------|--------|---------|---------|--------|--------|
| 9 | DSE4   | YNR067C   | -      | -      | EtOHcl1 | EtOHcl2 | Galcl1 | -      | YPDnc2 | -      | YPDnc4 | EtOHnc1 | EtOHnc2 | Galnc1 | Galnc2 |
| 9 | SBP1   | YHL034C   | -      | -      | EtOHcl1 | -       | Galcl1 | YPDnc1 | YPDnc2 | YPDnc3 | YPDnc4 | EtOHnc1 | EtOHnc2 | Galnc1 | -      |
| 9 |        | YGL063C-A | YPDcl2 | YPDcl3 | EtOHcl1 | -       | -      | -      | YPDnc2 | YPDnc3 | YPDnc4 | EtOHnc1 | -       | Galnc1 | Galnc2 |
| 9 | AQR1   | YNL065W   | YPDcl2 | -      | EtOHcl1 | EtOHcl2 | Galcl1 | YPDnc1 | -      | -      | -      | EtOHnc1 | EtOHnc2 | Galnc1 | Galnc2 |
| 9 | ERG28  | YER044C   | YPDcl2 | YPDcl3 | EtOHcl1 | EtOHcl2 | Galcl1 | -      | YPDnc2 | -      | YPDnc4 | -       | EtOHnc2 | -      | Galnc2 |
| 9 |        | YJL202C   | YPDcl2 | YPDcl3 | -       | EtOHcl2 | Galcl1 | -      | YPDnc2 | YPDnc3 | YPDnc4 | EtOHnc1 | -       | Galnc1 | -      |
| 9 |        | YLR365W   | -      | -      | EtOHcl1 | -       | Galcl1 | YPDnc1 | YPDnc2 | YPDnc3 | -      | EtOHnc1 | EtOHnc2 | Galnc1 | Galnc2 |
| 9 |        | YHR127W   | -      | -      | -       | -       | Galcl1 | YPDnc1 | YPDnc2 | YPDnc3 | YPDnc4 | EtOHnc1 | EtOHnc2 | Galnc1 | Galnc2 |
| 9 |        | YNL144C   | -      | YPDcl3 | EtOHcl1 | EtOHcl2 | Galcl1 | YPDnc1 | -      | -      | -      | EtOHnc1 | EtOHnc2 | Galnc1 | Galnc2 |
| 9 | CYM1   | YDR430C   | -      | YPDcl3 | -       | EtOHcl2 | Galcl1 | YPDnc1 | -      | -      | YPDnc4 | EtOHnc1 | EtOHnc2 | Galnc1 | Galnc2 |
| 9 |        | YDR521W   | YPDcl2 | YPDcl3 | EtOHcl1 | EtOHcl2 | Galcl1 | -      | YPDnc2 | YPDnc3 | YPDnc4 | -       | -       | Galnc1 | -      |
| 9 |        | YLR179C   | -      | -      | EtOHcl1 | -       | -      | YPDnc1 | YPDnc2 | YPDnc3 | YPDnc4 | EtOHnc1 | EtOHnc2 | Galnc1 | Galnc2 |
| 9 | MUM3   | YOR298W   | YPDcl2 | YPDcl3 | EtOHcl1 | EtOHcl2 | Galcl1 | -      | -      | -      | -      | EtOHnc1 | EtOHnc2 | Galnc1 | Galnc2 |
| 9 | TPK2   | YPL203W   | -      | -      | EtOHcl1 | EtOHcl2 | Galcl1 | YPDnc1 | -      | -      | YPDnc4 | EtOHnc1 | EtOHnc2 | Galnc1 | Galnc2 |
| 9 | MSI1   | YBR195C   | -      | YPDcl3 | -       | EtOHcl2 | -      | YPDnc1 | YPDnc2 | YPDnc3 | YPDnc4 | -       | EtOHnc2 | Galnc1 | Galnc2 |
| 9 | GAL3   | YDR009W   | YPDcl2 | -      | EtOHcl1 | EtOHcl2 | Galcl1 | YPDnc1 | -      | -      | YPDnc4 | EtOHnc1 | -       | Galnc1 | Galnc2 |
| 9 | RIA1   | YNL163C   | YPDcl2 | YPDcl3 | EtOHcl1 | EtOHcl2 | Galcl1 | -      | YPDnc2 | YPDnc3 | YPDnc4 | -       | EtOHnc2 | -      | -      |
| 9 | SCS2   | YER120W   | YPDcl2 | -      | EtOHcl1 | -       | -      | YPDnc1 | YPDnc2 | YPDnc3 | YPDnc4 | EtOHnc1 | -       | Galnc1 | Galnc2 |
| 9 | YHM2   | YMR241W   | YPDcl2 | -      | EtOHcl1 | EtOHcl2 | -      | YPDnc1 | -      | YPDnc3 | -      | EtOHnc1 | EtOHnc2 | Galnc1 | Galnc2 |
| 9 | RPS22B | YLR367W   | YPDcl2 | YPDcl3 | -       | EtOHcl2 | Galcl1 | YPDnc1 | -      | YPDnc3 | -      | EtOHnc1 | -       | Galnc1 | Galnc2 |
| 9 | SNZ1   | YMR096W   | YPDcl2 | YPDcl3 | -       | EtOHcl2 | Galcl1 | -      | YPDnc2 | YPDnc3 | YPDnc4 | EtOHnc1 | -       | Galnc1 | -      |
| 9 | RMR1   | YGL250W   | YPDcl2 | -      | EtOHcl1 | EtOHcl2 | Galcl1 | YPDnc1 | -      | YPDnc3 | YPDnc4 | EtOHnc1 | EtOHnc2 | -      | -      |
| 9 | NTH1   | YDR001C   | YPDcl2 | YPDcl3 | -       | EtOHcl2 | Galcl1 | YPDnc1 | -      | -      | -      | EtOHnc1 | EtOHnc2 | Galnc1 | Galnc2 |
| 9 |        | YKR070W   | YPDcl2 | YPDcl3 | EtOHcl1 | EtOHcl2 | Galcl1 | -      | -      | -      | YPDnc4 | EtOHnc1 | -       | Galnc1 | Galnc2 |
| 9 | REE1   | YJL217W   | -      | -      | EtOHcl1 | -       | Galcl1 | YPDnc1 | YPDnc2 | YPDnc3 | -      | EtOHnc1 | EtOHnc2 | Galnc1 | Galnc2 |
| 9 | MTC2   | YKL098W   | -      | YPDcl3 | EtOHcl1 | EtOHcl2 | Galcl1 | YPDnc1 | YPDnc2 | YPDnc3 | -      | EtOHnc1 | EtOHnc2 | -      | -      |
| 9 |        | YHR069C-A | -      | YPDcl3 | EtOHcl1 | EtOHcl2 | Galcl1 | YPDnc1 | -      | -      | -      | EtOHnc1 | EtOHnc2 | Galnc1 | Galnc2 |
| 9 | UGO1   | YDR470C   | YPDcl2 | -      | EtOHcl1 | EtOHcl2 | Galcl1 | -      | -      | -      | YPDnc4 | EtOHnc1 | EtOHnc2 | Galnc1 | Galnc2 |
| 9 | RAD53  | YPL153C   | -      | -      | -       | -       | Galcl1 | YPDnc1 | YPDnc2 | YPDnc3 | YPDnc4 | EtOHnc1 | EtOHnc2 | Galnc1 | Galnc2 |
| 9 | ATP10  | YLR393W   | -      | -      | -       | -       | Galcl1 | YPDnc1 | YPDnc2 | YPDnc3 | YPDnc4 | EtOHnc1 | EtOHnc2 | Galnc1 | Galnc2 |
| 9 |        | YDR431W   | -      | YPDcl3 | -       | EtOHcl2 | Galcl1 | YPDnc1 | -      | -      | YPDnc4 | EtOHnc1 | EtOHnc2 | Galnc1 | Galnc2 |
| 9 | EFG1   | YGR271C-A | -      | YPDcl3 | EtOHcl1 | -       | Galcl1 | YPDnc1 | YPDnc2 | YPDnc3 | YPDnc4 | -       | -       | Galnc1 | Galnc2 |
| 9 | MVB12  | YGR206W   | YPDcl2 | YPDcl3 | -       | EtOHcl2 | Galcl1 | -      | YPDnc2 | -      | YPDnc4 | EtOHnc1 | EtOHnc2 | -      | Galnc2 |
| 9 | ARF1   | YDL192W   | YPDcl2 | -      | EtOHcl1 | -       | Galcl1 | YPDnc1 | YPDnc2 | -      | YPDnc4 | EtOHnc1 | EtOHnc2 | Galnc1 | -      |

|   |        |           |        |        |         |         |        |        |        |        |        |         |         |        |        |
|---|--------|-----------|--------|--------|---------|---------|--------|--------|--------|--------|--------|---------|---------|--------|--------|
| 9 | RPS22A | YJL190C   | -      | YPDcl3 | EtOHcl1 | EtOHcl2 | -      | -      | YPDnc2 | YPDnc3 | -      | EtOHnc1 | EtOHnc2 | Galnc1 | Galnc2 |
| 9 | YPT35  | YHR105W   | -      | YPDcl3 | EtOHcl1 | -       | Galcl1 | YPDnc1 | YPDnc2 | YPDnc3 | YPDnc4 | -       | EtOHnc2 | Galnc1 | -      |
| 9 | THR4   | YCR053W   | -      | YPDcl3 | EtOHcl1 | -       | -      | YPDnc1 | -      | YPDnc3 | YPDnc4 | EtOHnc1 | EtOHnc2 | Galnc1 | Galnc2 |
| 9 | DOA4   | YDR069C   | YPDcl2 | YPDcl3 | EtOHcl1 | -       | Galcl1 | YPDnc1 | -      | YPDnc3 | YPDnc4 | -       | -       | Galnc1 | Galnc2 |
| 9 | HOS4   | YIL112W   | -      | -      | EtOHcl1 | -       | Galcl1 | -      | YPDnc2 | YPDnc3 | YPDnc4 | EtOHnc1 | EtOHnc2 | Galnc1 | Galnc2 |
| 9 | LRG1   | YDL240W   | -      | YPDcl3 | -       | -       | Galcl1 | YPDnc1 | -      | YPDnc3 | YPDnc4 | EtOHnc1 | EtOHnc2 | Galnc1 | Galnc2 |
| 9 | TAD2   | YJL035C   | -      | -      | EtOHcl1 | EtOHcl2 | Galcl1 | YPDnc1 | -      | -      | YPDnc4 | EtOHnc1 | EtOHnc2 | Galnc1 | Galnc2 |
| 9 |        | YGL039W   | -      | -      | -       | -       | Galcl1 | YPDnc1 | YPDnc2 | YPDnc3 | YPDnc4 | EtOHnc1 | EtOHnc2 | Galnc1 | Galnc2 |
| 9 | SUB2   | YDL084W   | YPDcl2 | YPDcl3 | -       | -       | Galcl1 | -      | YPDnc2 | YPDnc3 | YPDnc4 | EtOHnc1 | EtOHnc2 | -      | Galnc2 |
| 9 |        | YAR029W   | YPDcl2 | YPDcl3 | EtOHcl1 | EtOHcl2 | Galcl1 | -      | YPDnc2 | YPDnc3 | YPDnc4 | -       | -       | Galnc1 | -      |
| 9 |        | YGR240C-A | YPDcl2 | -      | EtOHcl1 | -       | Galcl1 | YPDnc1 | -      | YPDnc3 | -      | EtOHnc1 | EtOHnc2 | Galnc1 | Galnc2 |
| 9 |        | YGR182C   | -      | -      | EtOHcl1 | -       | Galcl1 | YPDnc1 | YPDnc2 | YPDnc3 | YPDnc4 | EtOHnc1 | -       | Galnc1 | Galnc2 |
| 9 |        | YKL215C   | YPDcl2 | -      | EtOHcl1 | -       | Galcl1 | YPDnc1 | YPDnc2 | -      | YPDnc4 | EtOHnc1 | -       | Galnc1 | Galnc2 |
| 9 |        | YNL067W-7 | -      | YPDcl3 | -       | EtOHcl2 | Galcl1 | YPDnc1 | YPDnc2 | -      | -      | EtOHnc1 | EtOHnc2 | Galnc1 | Galnc2 |
| 9 |        | YER006C-A | YPDcl2 | YPDcl3 | EtOHcl1 | EtOHcl2 | Galcl1 | -      | -      | -      | -      | EtOHnc1 | EtOHnc2 | Galnc1 | Galnc2 |
| 9 |        | YBR062C   | -      | YPDcl3 | EtOHcl1 | -       | Galcl1 | -      | YPDnc2 | YPDnc3 | YPDnc4 | EtOHnc1 | EtOHnc2 | Galnc1 | -      |
| 9 | TIF6   | YPR016C   | YPDcl2 | -      | -       | -       | Galcl1 | -      | YPDnc2 | YPDnc3 | YPDnc4 | EtOHnc1 | EtOHnc2 | Galnc1 | Galnc2 |
| 9 |        | YPL067C   | YPDcl2 | YPDcl3 | EtOHcl1 | -       | Galcl1 | YPDnc1 | -      | YPDnc3 | -      | EtOHnc1 | -       | Galnc1 | Galnc2 |
| 9 | DFG5   | YMR238W   | -      | -      | EtOHcl1 | EtOHcl2 | Galcl1 | -      | YPDnc2 | YPDnc3 | -      | EtOHnc1 | EtOHnc2 | Galnc1 | Galnc2 |
| 9 | RMD8   | YFR048W   | YPDcl2 | YPDcl3 | EtOHcl1 | EtOHcl2 | Galcl1 | YPDnc1 | -      | -      | -      | EtOHnc1 | -       | Galnc1 | Galnc2 |
| 9 | PMP3   | YDR276C   | YPDcl2 | YPDcl3 | EtOHcl1 | EtOHcl2 | -      | YPDnc1 | -      | -      | YPDnc4 | EtOHnc1 | -       | Galnc1 | Galnc2 |
| 9 | RPP2B  | YDR382W   | -      | -      | EtOHcl1 | -       | Galcl1 | YPDnc1 | YPDnc2 | -      | YPDnc4 | EtOHnc1 | EtOHnc2 | Galnc1 | Galnc2 |
| 9 | CKI1   | YLR133W   | YPDcl2 | YPDcl3 | EtOHcl1 | -       | Galcl1 | YPDnc1 | YPDnc2 | -      | YPDnc4 | EtOHnc1 | -       | -      | Galnc2 |
| 9 | CDC27  | YBL084C   | -      | -      | EtOHcl1 | -       | Galcl1 | YPDnc1 | YPDnc2 | YPDnc3 | YPDnc4 | EtOHnc1 | EtOHnc2 | Galnc1 | -      |
| 9 | RRP45  | YDR280W   | -      | -      | EtOHcl1 | EtOHcl2 | -      | YPDnc1 | YPDnc2 | YPDnc3 | YPDnc4 | -       | EtOHnc2 | Galnc1 | Galnc2 |
| 9 | PYC2   | YBR218C   | YPDcl2 | YPDcl3 | EtOHcl1 | -       | -      | YPDnc1 | YPDnc2 | YPDnc3 | YPDnc4 | -       | EtOHnc2 | -      | Galnc2 |
| 9 | MST28  | YAR033W   | -      | -      | EtOHcl1 | EtOHcl2 | -      | YPDnc1 | YPDnc2 | YPDnc3 | -      | EtOHnc1 | EtOHnc2 | Galnc1 | Galnc2 |
| 9 |        | YBR284W   | YPDcl2 | YPDcl3 | -       | -       | Galcl1 | YPDnc1 | YPDnc2 | YPDnc3 | YPDnc4 | -       | -       | Galnc1 | Galnc2 |
| 9 |        | YDR183C-A | YPDcl2 | -      | EtOHcl1 | EtOHcl2 | Galcl1 | -      | YPDnc2 | -      | -      | EtOHnc1 | EtOHnc2 | Galnc1 | Galnc2 |
| 9 |        | YER079W   | -      | -      | EtOHcl1 | EtOHcl2 | -      | YPDnc1 | YPDnc2 | YPDnc3 | -      | EtOHnc1 | EtOHnc2 | Galnc1 | Galnc2 |
| 9 | SHS1   | YDL225W   | YPDcl2 | YPDcl3 | EtOHcl1 | -       | -      | YPDnc1 | -      | YPDnc3 | -      | EtOHnc1 | EtOHnc2 | Galnc1 | Galnc2 |
| 9 | POP6   | YGR030C   | YPDcl2 | YPDcl3 | EtOHcl1 | EtOHcl2 | Galcl1 | YPDnc1 | -      | -      | YPDnc4 | EtOHnc1 | -       | -      | Galnc2 |
| 9 | ADK1   | YDR226W   | YPDcl2 | -      | -       | EtOHcl2 | -      | YPDnc1 | YPDnc2 | YPDnc3 | YPDnc4 | EtOHnc1 | -       | Galnc1 | Galnc2 |
| 9 |        | YLR399W-A | -      | YPDcl3 | EtOHcl1 | -       | -      | YPDnc1 | YPDnc2 | YPDnc3 | -      | EtOHnc1 | EtOHnc2 | Galnc1 | Galnc2 |

|   |        |            |        |        |         |         |        |        |        |        |        |         |         |        |        |
|---|--------|------------|--------|--------|---------|---------|--------|--------|--------|--------|--------|---------|---------|--------|--------|
| 9 | ATG12  | YBR217W    | -      | YPDcl3 | -       | -       | Galcl1 | YPDnc1 | YPDnc2 | YPDnc3 | YPDnc4 | EtOHnc1 | -       | Galnc1 | Galnc2 |
| 9 | MER1   | YNL210W    | YPDcl2 | YPDcl3 | EtOHcl1 | EtOHcl2 | Galcl1 | -      | YPDnc2 | YPDnc3 | YPDnc4 | -       | -       | Galnc1 | -      |
| 9 | GLC7   | YER133W    | YPDcl2 | -      | EtOHcl1 | -       | Galcl1 | YPDnc1 | -      | YPDnc3 | -      | EtOHnc1 | EtOHnc2 | Galnc1 | Galnc2 |
| 9 |        | YHL044W    | -      | -      | EtOHcl1 | -       | -      | YPDnc1 | YPDnc2 | YPDnc3 | YPDnc4 | EtOHnc1 | EtOHnc2 | Galnc1 | Galnc2 |
| 9 | HSP30  | YCR021C    | -      | YPDcl3 | EtOHcl1 | -       | Galcl1 | YPDnc1 | -      | -      | YPDnc4 | EtOHnc1 | EtOHnc2 | Galnc1 | Galnc2 |
| 9 | CHS2   | YBR038W    | YPDcl2 | -      | -       | -       | Galcl1 | YPDnc1 | YPDnc2 | YPDnc3 | YPDnc4 | EtOHnc1 | -       | Galnc1 | Galnc2 |
| 9 | EFT2   | YDR385W    | -      | YPDcl3 | EtOHcl1 | -       | Galcl1 | YPDnc1 | -      | -      | YPDnc4 | EtOHnc1 | EtOHnc2 | Galnc1 | Galnc2 |
| 9 | RPL11A | YPR102C    | YPDcl2 | YPDcl3 | EtOHcl1 | -       | Galcl1 | YPDnc1 | -      | -      | -      | EtOHnc1 | EtOHnc2 | Galnc1 | Galnc2 |
| 9 | GCD11  | YER025W    | YPDcl2 | YPDcl3 | EtOHcl1 | EtOHcl2 | Galcl1 | YPDnc1 | YPDnc2 | -      | YPDnc4 | -       | -       | Galnc1 | -      |
| 9 | MTR10  | YOR160W    | YPDcl2 | YPDcl3 | EtOHcl1 | EtOHcl2 | Galcl1 | -      | YPDnc2 | YPDnc3 | -      | -       | EtOHnc2 | -      | Galnc2 |
| 9 |        | YGR026W    | YPDcl2 | YPDcl3 | -       | EtOHcl2 | -      | YPDnc1 | YPDnc2 | YPDnc3 | -      | EtOHnc1 | EtOHnc2 | Galnc1 | -      |
| 9 | RPL4A  | YBR031W    | YPDcl2 | YPDcl3 | EtOHcl1 | -       | Galcl1 | YPDnc1 | YPDnc2 | YPDnc3 | YPDnc4 | -       | EtOHnc2 | -      | -      |
| 9 | KRE11  | YGR166W    | YPDcl2 | -      | EtOHcl1 | -       | Galcl1 | YPDnc1 | YPDnc2 | -      | YPDnc4 | EtOHnc1 | -       | Galnc1 | Galnc2 |
| 9 | AFG3   | YER017C    | -      | YPDcl3 | EtOHcl1 | EtOHcl2 | -      | YPDnc1 | YPDnc2 | YPDnc3 | -      | -       | EtOHnc2 | Galnc1 | Galnc2 |
| 9 | YMR31  | YFR049W    | YPDcl2 | YPDcl3 | EtOHcl1 | -       | Galcl1 | YPDnc1 | -      | YPDnc3 | -      | EtOHnc1 | -       | Galnc1 | Galnc2 |
| 9 |        | YPL113C    | -      | YPDcl3 | EtOHcl1 | EtOHcl2 | Galcl1 | YPDnc1 | -      | YPDnc3 | -      | EtOHnc1 | -       | Galnc1 | Galnc2 |
| 9 | IRA1   | YBR140C    | -      | YPDcl3 | -       | EtOHcl2 | Galcl1 | YPDnc1 | -      | YPDnc3 | YPDnc4 | -       | EtOHnc2 | Galnc1 | Galnc2 |
| 9 | UTP13  | YLR222C    | YPDcl2 | YPDcl3 | EtOHcl1 | EtOHcl2 | Galcl1 | -      | YPDnc2 | YPDnc3 | YPDnc4 | -       | EtOHnc2 | -      | -      |
| 9 |        | YMR316C-/- | -      | -      | EtOHcl1 | -       | Galcl1 | YPDnc1 | YPDnc2 | YPDnc3 | -      | EtOHnc1 | EtOHnc2 | Galnc1 | Galnc2 |
| 9 | PUB1   | YNL016W    | YPDcl2 | -      | EtOHcl1 | -       | Galcl1 | YPDnc1 | YPDnc2 | YPDnc3 | -      | EtOHnc1 | -       | Galnc1 | Galnc2 |
| 9 | CWH43  | YCR017C    | YPDcl2 | -      | EtOHcl1 | EtOHcl2 | Galcl1 | -      | -      | -      | YPDnc4 | EtOHnc1 | EtOHnc2 | Galnc1 | Galnc2 |
| 9 | DJP1   | YIR004W    | YPDcl2 | -      | EtOHcl1 | EtOHcl2 | Galcl1 | -      | -      | YPDnc3 | -      | EtOHnc1 | EtOHnc2 | Galnc1 | Galnc2 |
| 9 | RPL11B | YGR085C    | YPDcl2 | YPDcl3 | EtOHcl1 | EtOHcl2 | Galcl1 | YPDnc1 | YPDnc2 | -      | -      | -       | -       | Galnc1 | Galnc2 |
| 9 | NUS1   | YDL193W    | YPDcl2 | -      | EtOHcl1 | -       | Galcl1 | YPDnc1 | YPDnc2 | -      | YPDnc4 | EtOHnc1 | EtOHnc2 | Galnc1 | -      |
| 9 |        | YGR127W    | -      | -      | -       | EtOHcl2 | Galcl1 | YPDnc1 | YPDnc2 | YPDnc3 | -      | EtOHnc1 | EtOHnc2 | Galnc1 | Galnc2 |
| 9 |        | YOR199W    | -      | -      | EtOHcl1 | -       | -      | YPDnc1 | YPDnc2 | YPDnc3 | YPDnc4 | EtOHnc1 | EtOHnc2 | Galnc1 | Galnc2 |
| 9 | IRC10  | YOL015W    | -      | YPDcl3 | EtOHcl1 | -       | Galcl1 | -      | -      | YPDnc3 | YPDnc4 | EtOHnc1 | EtOHnc2 | Galnc1 | Galnc2 |
| 9 | NDJ1   | YOL104C    | -      | YPDcl3 | -       | -       | Galcl1 | YPDnc1 | YPDnc2 | YPDnc3 | YPDnc4 | EtOHnc1 | -       | Galnc1 | Galnc2 |
| 9 |        | YBR224W    | -      | -      | -       | EtOHcl2 | Galcl1 | YPDnc1 | YPDnc2 | YPDnc3 | -      | EtOHnc1 | EtOHnc2 | Galnc1 | Galnc2 |
| 9 |        | YCL022C    | -      | -      | EtOHcl1 | -       | -      | YPDnc1 | YPDnc2 | YPDnc3 | YPDnc4 | EtOHnc1 | EtOHnc2 | Galnc1 | Galnc2 |
| 9 | ERG10  | YPL028W    | -      | YPDcl3 | EtOHcl1 | -       | Galcl1 | -      | YPDnc2 | YPDnc3 | YPDnc4 | -       | EtOHnc2 | Galnc1 | Galnc2 |
| 9 |        | YBL044W    | -      | -      | EtOHcl1 | -       | -      | YPDnc1 | YPDnc2 | YPDnc3 | YPDnc4 | EtOHnc1 | EtOHnc2 | Galnc1 | Galnc2 |
| 9 | LEU3   | YLR451W    | -      | -      | EtOHcl1 | -       | Galcl1 | YPDnc1 | YPDnc2 | YPDnc3 | -      | EtOHnc1 | EtOHnc2 | Galnc1 | Galnc2 |
| 9 |        | YFL013W-/- | YPDcl2 | YPDcl3 | -       | EtOHcl2 | Galcl1 | YPDnc1 | -      | -      | -      | EtOHnc1 | EtOHnc2 | Galnc1 | Galnc2 |

|   |        |           |        |        |         |         |        |        |        |        |        |         |         |        |        |
|---|--------|-----------|--------|--------|---------|---------|--------|--------|--------|--------|--------|---------|---------|--------|--------|
| 9 | URE2   | YNL229C   | YPDcl2 | -      | EtOHcl1 | -       | Galcl1 | YPDnc1 | YPDnc2 | -      | YPDnc4 | EtOHnc1 | EtOHnc2 | Galnc1 | -      |
| 9 | AAR2   | YBL074C   | -      | -      | EtOHcl1 | -       | Galcl1 | -      | YPDnc2 | YPDnc3 | YPDnc4 | EtOHnc1 | EtOHnc2 | Galnc1 | Galnc2 |
| 9 |        | YLR413W   | YPDcl2 | YPDcl3 | EtOHcl1 | EtOHcl2 | -      | YPDnc1 | -      | -      | -      | EtOHnc1 | EtOHnc2 | Galnc1 | Galnc2 |
| 9 | IRC5   | YFR038W   | -      | YPDcl3 | -       | EtOHcl2 | Galcl1 | YPDnc1 | -      | -      | YPDnc4 | EtOHnc1 | EtOHnc2 | Galnc1 | Galnc2 |
| 9 | NTE1   | YML059C   | -      | -      | EtOHcl1 | EtOHcl2 | Galcl1 | YPDnc1 | YPDnc2 | YPDnc3 | YPDnc4 | -       | EtOHnc2 | -      | Galnc2 |
| 9 | RPS16B | YDL083C   | YPDcl2 | YPDcl3 | -       | -       | Galcl1 | -      | YPDnc2 | YPDnc3 | YPDnc4 | EtOHnc1 | EtOHnc2 | -      | Galnc2 |
| 9 | PDH1   | YPR002W   | YPDcl2 | -      | EtOHcl1 | -       | Galcl1 | YPDnc1 | YPDnc2 | YPDnc3 | YPDnc4 | -       | EtOHnc2 | -      | Galnc2 |
| 9 | IRC13  | YOR235W   | -      | -      | EtOHcl1 | -       | Galcl1 | YPDnc1 | YPDnc2 | YPDnc3 | -      | EtOHnc1 | EtOHnc2 | Galnc1 | Galnc2 |
| 9 |        | YMR315W   | YPDcl2 | YPDcl3 | EtOHcl1 | EtOHcl2 | Galcl1 | -      | -      | -      | YPDnc4 | EtOHnc1 | -       | Galnc1 | Galnc2 |
| 9 | CYT1   | YOR065W   | -      | -      | EtOHcl1 | -       | -      | YPDnc1 | YPDnc2 | YPDnc3 | YPDnc4 | EtOHnc1 | EtOHnc2 | Galnc1 | Galnc2 |
| 9 |        | YBL029W   | YPDcl2 | -      | EtOHcl1 | -       | Galcl1 | -      | YPDnc2 | YPDnc3 | YPDnc4 | -       | EtOHnc2 | Galnc1 | Galnc2 |
| 9 | RME1   | YGR044C   | -      | -      | EtOHcl1 | -       | Galcl1 | YPDnc1 | YPDnc2 | YPDnc3 | YPDnc4 | EtOHnc1 | -       | Galnc1 | Galnc2 |
| 9 | ZIP1   | YDR285W   | -      | YPDcl3 | EtOHcl1 | -       | Galcl1 | YPDnc1 | YPDnc2 | YPDnc3 | YPDnc4 | -       | EtOHnc2 | Galnc1 | -      |
| 9 | POX1   | YGL205W   | YPDcl2 | YPDcl3 | EtOHcl1 | EtOHcl2 | Galcl1 | -      | YPDnc2 | YPDnc3 | YPDnc4 | -       | -       | -      | Galnc2 |
| 9 | EXG1   | YLR300W   | -      | YPDcl3 | EtOHcl1 | -       | -      | YPDnc1 | YPDnc2 | YPDnc3 | YPDnc4 | EtOHnc1 | -       | Galnc1 | Galnc2 |
| 9 | RAD28  | YDR030C   | YPDcl2 | YPDcl3 | EtOHcl1 | EtOHcl2 | Galcl1 | -      | YPDnc2 | YPDnc3 | YPDnc4 | -       | EtOHnc2 | -      | -      |
| 9 | RPS23B | YPR132W   | -      | -      | EtOHcl1 | EtOHcl2 | Galcl1 | YPDnc1 | -      | YPDnc3 | -      | EtOHnc1 | EtOHnc2 | Galnc1 | Galnc2 |
| 9 |        | YIL100C-A | -      | YPDcl3 | EtOHcl1 | -       | -      | -      | YPDnc2 | YPDnc3 | YPDnc4 | EtOHnc1 | EtOHnc2 | Galnc1 | Galnc2 |
| 9 | YMC1   | YPR058W   | YPDcl2 | -      | EtOHcl1 | EtOHcl2 | Galcl1 | YPDnc1 | YPDnc2 | -      | YPDnc4 | -       | EtOHnc2 | Galnc1 | -      |
| 9 | HOT13  | YKL084W   | YPDcl2 | YPDcl3 | EtOHcl1 | EtOHcl2 | Galcl1 | -      | YPDnc2 | -      | YPDnc4 | EtOHnc1 | -       | -      | Galnc2 |
| 9 |        | YHR063W   | YPDcl2 | -      | EtOHcl1 | EtOHcl2 | Galcl1 | YPDnc1 | -      | -      | -      | EtOHnc1 | EtOHnc2 | Galnc1 | Galnc2 |
| 9 | ERG27  | YLR100W   | -      | -      | EtOHcl1 | EtOHcl2 | -      | YPDnc1 | YPDnc2 | YPDnc3 | YPDnc4 | -       | EtOHnc2 | Galnc1 | Galnc2 |
| 9 | CMP2   | YML057W   | YPDcl2 | YPDcl3 | EtOHcl1 | EtOHcl2 | Galcl1 | -      | YPDnc2 | -      | YPDnc4 | EtOHnc1 | EtOHnc2 | -      | -      |
| 9 | DBF4   | YDR052C   | YPDcl2 | YPDcl3 | -       | EtOHcl2 | Galcl1 | -      | YPDnc2 | YPDnc3 | YPDnc4 | -       | EtOHnc2 | Galnc1 | -      |
| 9 | CYT2   | YKL087C   | -      | YPDcl3 | EtOHcl1 | EtOHcl2 | Galcl1 | -      | YPDnc2 | YPDnc3 | YPDnc4 | -       | EtOHnc2 | -      | Galnc2 |
| 9 |        | YML101C-A | -      | -      | EtOHcl1 | EtOHcl2 | Galcl1 | YPDnc1 | YPDnc2 | YPDnc3 | -      | -       | EtOHnc2 | Galnc1 | Galnc2 |
| 9 | IMD4   | YML056C   | YPDcl2 | YPDcl3 | EtOHcl1 | EtOHcl2 | Galcl1 | -      | YPDnc2 | YPDnc3 | YPDnc4 | -       | EtOHnc2 | -      | -      |
| 9 | HIP1   | YGR191W   | YPDcl2 | -      | EtOHcl1 | EtOHcl2 | Galcl1 | YPDnc1 | -      | -      | -      | EtOHnc1 | EtOHnc2 | Galnc1 | Galnc2 |
| 9 | PTP2   | YOR208W   | YPDcl2 | YPDcl3 | EtOHcl1 | EtOHcl2 | Galcl1 | YPDnc1 | -      | -      | -      | EtOHnc1 | -       | Galnc1 | Galnc2 |
| 9 | NOP9   | YJL010C   | -      | -      | EtOHcl1 | -       | -      | YPDnc1 | YPDnc2 | YPDnc3 | YPDnc4 | EtOHnc1 | EtOHnc2 | Galnc1 | Galnc2 |
| 9 | PLC1   | YPL268W   | YPDcl2 | YPDcl3 | -       | -       | Galcl1 | -      | YPDnc2 | -      | YPDnc4 | EtOHnc1 | EtOHnc2 | Galnc1 | Galnc2 |
| 9 |        | YLL053C   | -      | -      | EtOHcl1 | -       | Galcl1 | -      | YPDnc2 | YPDnc3 | YPDnc4 | EtOHnc1 | EtOHnc2 | Galnc1 | Galnc2 |
| 8 | RTT10  | YPL183C   | -      | -      | -       | EtOHcl2 | Galcl1 | -      | YPDnc2 | YPDnc3 | YPDnc4 | EtOHnc1 | -       | Galnc1 | Galnc2 |
| 8 |        | YNL228W   | -      | -      | -       | -       | -      | YPDnc1 | YPDnc2 | YPDnc3 | YPDnc4 | EtOHnc1 | EtOHnc2 | Galnc1 | Galnc2 |



|   |           |         |        |         |         |         |        |        |        |        |         |         |         |        |        |
|---|-----------|---------|--------|---------|---------|---------|--------|--------|--------|--------|---------|---------|---------|--------|--------|
| 8 | YLR434C   | YPDcl2  | -      | -       | -       | Galcl1  | YPDnc1 | -      | -      | YPDnc4 | EtOHnc1 | EtOHnc2 | Galnc1  | Galnc2 |        |
| 8 | VBA4      | YDR119W | YPDcl2 | YPDcl3  | -       | -       | Galcl1 | -      | YPDnc2 | YPDnc3 | YPDnc4  | EtOHnc1 | -       | -      | Galnc2 |
| 8 | CEM1      | YER061C | YPDcl2 | YPDcl3  | -       | EtOHcl2 | Galcl1 | YPDnc1 | -      | -      | -       | EtOHnc1 | EtOHnc2 | -      | Galnc2 |
| 8 | HNT1      | YDL125C | -      | YPDcl3  | -       | EtOHcl2 | Galcl1 | YPDnc1 | -      | YPDnc3 | -       | EtOHnc1 | -       | Galnc1 | Galnc2 |
| 8 | YOL166C   | -       | YPDcl3 | EtOHcl1 | -       | -       | Galcl1 | YPDnc1 | YPDnc2 | -      | YPDnc4  | -       | -       | Galnc1 | Galnc2 |
| 8 | TGL5      | YOR081C | -      | -       | -       | EtOHcl2 | -      | -      | YPDnc2 | YPDnc3 | YPDnc4  | EtOHnc1 | EtOHnc2 | Galnc1 | Galnc2 |
| 8 | YGL079W   | YPDcl2  | -      | -       | -       | EtOHcl2 | Galcl1 | YPDnc1 | -      | -      | -       | EtOHnc1 | EtOHnc2 | Galnc1 | Galnc2 |
| 8 | VPS73     | YGL104C | YPDcl2 | YPDcl3  | EtOHcl1 | EtOHcl2 | Galcl1 | -      | YPDnc2 | -      | YPDnc4  | -       | EtOHnc2 | -      | -      |
| 8 | YLR264C-A | YPDcl2  | YPDcl3 | -       | -       | -       | Galcl1 | -      | YPDnc2 | YPDnc3 | YPDnc4  | EtOHnc1 | -       | -      | Galnc2 |
| 8 | YLR445W   | YPDcl2  | -      | -       | -       | -       | Galcl1 | YPDnc1 | YPDnc2 | YPDnc3 | YPDnc4  | EtOHnc1 | -       | Galnc1 | -      |
| 8 | MSH5      | YDL154W | -      | YPDcl3  | -       | -       | Galcl1 | YPDnc1 | -      | YPDnc3 | YPDnc4  | EtOHnc1 | -       | Galnc1 | Galnc2 |
| 8 | CTA1      | YDR256C | YPDcl2 | -       | EtOHcl1 | -       | Galcl1 | -      | -      | YPDnc3 | -       | EtOHnc1 | EtOHnc2 | Galnc1 | Galnc2 |
| 8 | PTI1      | YGR156W | -      | YPDcl3  | EtOHcl1 | -       | Galcl1 | YPDnc1 | YPDnc2 | YPDnc3 | -       | EtOHnc1 | -       | Galnc1 | -      |
| 8 | TOP3      | YLR234W | -      | YPDcl3  | -       | -       | Galcl1 | -      | YPDnc2 | YPDnc3 | YPDnc4  | EtOHnc1 | EtOHnc2 | -      | Galnc2 |
| 8 | YOR053W   | YPDcl2  | -      | -       | -       | -       | Galcl1 | YPDnc1 | YPDnc2 | YPDnc3 | -       | EtOHnc1 | EtOHnc2 | Galnc1 | Galnc2 |
| 8 | YER084W   | YPDcl2  | -      | EtOHcl1 | -       | -       | Galcl1 | -      | YPDnc2 | YPDnc3 | YPDnc4  | -       | EtOHnc2 | Galnc1 | -      |
| 8 | YMR141W   | YPDcl2  | -      | EtOHcl1 | -       | -       | Galcl1 | YPDnc1 | YPDnc2 | YPDnc3 | -       | -       | EtOHnc2 | Galnc1 | -      |
| 8 | YOR192C-C | -       | -      | -       | -       | -       | Galcl1 | YPDnc1 | YPDnc2 | -      | YPDnc4  | EtOHnc1 | EtOHnc2 | Galnc1 | Galnc2 |
| 8 | POP2      | YNR052C | -      | YPDcl3  | EtOHcl1 | EtOHcl2 | Galcl1 | YPDnc1 | -      | -      | YPDnc4  | EtOHnc1 | -       | -      | Galnc2 |
| 8 | CDC24     | YAL041W | -      | -       | EtOHcl1 | -       | -      | YPDnc1 | YPDnc2 | YPDnc3 | -       | EtOHnc1 | EtOHnc2 | Galnc1 | Galnc2 |
| 8 | INO1      | YJL153C | -      | -       | EtOHcl1 | -       | Galcl1 | YPDnc1 | YPDnc2 | YPDnc3 | -       | EtOHnc1 | EtOHnc2 | Galnc1 | -      |
| 8 | CDC10     | YCR002C | YPDcl2 | -       | -       | -       | Galcl1 | YPDnc1 | -      | -      | YPDnc4  | EtOHnc1 | EtOHnc2 | Galnc1 | Galnc2 |
| 8 | SPS19     | YNL202W | -      | -       | EtOHcl1 | -       | Galcl1 | YPDnc1 | YPDnc2 | -      | -       | EtOHnc1 | EtOHnc2 | Galnc1 | Galnc2 |
| 8 | YIG1      | YPL201C | YPDcl2 | -       | EtOHcl1 | EtOHcl2 | Galcl1 | -      | YPDnc2 | YPDnc3 | -       | EtOHnc1 | -       | Galnc1 | -      |
| 8 | ARB1      | YER036C | -      | YPDcl3  | -       | -       | Galcl1 | YPDnc1 | -      | -      | YPDnc4  | EtOHnc1 | EtOHnc2 | Galnc1 | Galnc2 |
| 8 | UTP5      | YDR398W | -      | YPDcl3  | EtOHcl1 | EtOHcl2 | -      | YPDnc1 | -      | -      | -       | EtOHnc1 | EtOHnc2 | Galnc1 | Galnc2 |
| 8 | ORM1      | YGR038W | YPDcl2 | YPDcl3  | EtOHcl1 | -       | Galcl1 | -      | YPDnc2 | -      | YPDnc4  | EtOHnc1 | -       | -      | Galnc2 |
| 8 | YNL017C   | -       | -      | EtOHcl1 | EtOHcl2 | Galcl1  | Galcl1 | YPDnc1 | -      | -      | -       | EtOHnc1 | EtOHnc2 | Galnc1 | Galnc2 |
| 8 | YER078W   | -       | YPDcl3 | -       | EtOHcl2 | -       | Galcl1 | YPDnc1 | YPDnc2 | -      | YPDnc4  | EtOHnc1 | -       | Galnc1 | Galnc2 |
| 8 | SEF1      | YBL066C | YPDcl2 | YPDcl3  | EtOHcl1 | EtOHcl2 | Galcl1 | -      | YPDnc2 | -      | YPDnc4  | -       | -       | Galnc1 | -      |
| 8 | VTS1      | YOR359W | YPDcl2 | -       | EtOHcl1 | EtOHcl2 | Galcl1 | YPDnc1 | -      | -      | -       | EtOHnc1 | EtOHnc2 | Galnc1 | -      |
| 8 | TIM13     | YGR181W | -      | -       | EtOHcl1 | -       | -      | YPDnc1 | YPDnc2 | YPDnc3 | YPDnc4  | EtOHnc1 | -       | Galnc1 | Galnc2 |
| 8 | YMR194C   | -       | YPDcl3 | EtOHcl1 | -       | -       | Galcl1 | YPDnc1 | -      | YPDnc3 | -       | EtOHnc1 | EtOHnc2 | -      | Galnc2 |
| 8 | YDR065W   | -       | YPDcl3 | EtOHcl1 | -       | -       | Galcl1 | -      | YPDnc2 | YPDnc3 | YPDnc4  | -       | EtOHnc2 | Galnc1 | -      |

|          |            |        |        |         |         |        |        |        |        |        |         |         |        |        |
|----------|------------|--------|--------|---------|---------|--------|--------|--------|--------|--------|---------|---------|--------|--------|
| 8 POP3   | YNL282W    | -      | YPDcl3 | EtOHcl1 | EtOHcl2 | Galcl1 | YPDnc1 | -      | -      | -      | EtOHnc1 | -       | Galnc1 | Galnc2 |
| 8        | YLR278C    | -      | -      | EtOHcl1 | -       | -      | YPDnc1 | YPDnc2 | YPDnc3 | -      | EtOHnc1 | EtOHnc2 | Galnc1 | Galnc2 |
| 8 BMH2   | YDR099W    | YPDcl2 | YPDcl3 | EtOHcl1 | -       | Galcl1 | -      | -      | -      | YPDnc4 | EtOHnc1 | -       | Galnc1 | Galnc2 |
| 8 CAF120 | YNL278W    | YPDcl2 | -      | EtOHcl1 | EtOHcl2 | Galcl1 | YPDnc1 | -      | -      | YPDnc4 | -       | EtOHnc2 | Galnc1 | -      |
| 8 YFH1   | YDL120W    | -      | -      | EtOHcl1 | EtOHcl2 | Galcl1 | YPDnc1 | YPDnc2 | -      | -      | -       | EtOHnc2 | Galnc1 | Galnc2 |
| 8 ILV2   | YMR108W    | -      | -      | -       | -       | Galcl1 | YPDnc1 | YPDnc2 | YPDnc3 | -      | EtOHnc1 | EtOHnc2 | Galnc1 | Galnc2 |
| 8 HHT2   | YNL031C    | -      | -      | EtOHcl1 | EtOHcl2 | -      | YPDnc1 | YPDnc2 | YPDnc3 | YPDnc4 | -       | -       | Galnc1 | Galnc2 |
| 8 HXT17  | YNR072W    | -      | -      | EtOHcl1 | -       | Galcl1 | YPDnc1 | -      | YPDnc3 | -      | EtOHnc1 | EtOHnc2 | Galnc1 | Galnc2 |
| 8 MSN4   | YKL062W    | -      | YPDcl3 | EtOHcl1 | EtOHcl2 | Galcl1 | -      | -      | -      | -      | EtOHnc1 | EtOHnc2 | Galnc1 | Galnc2 |
| 8        | YLR111W    | -      | -      | EtOHcl1 | EtOHcl2 | Galcl1 | YPDnc1 | -      | YPDnc3 | -      | EtOHnc1 | -       | Galnc1 | Galnc2 |
| 8 CCT4   | YDL143W    | YPDcl2 | -      | -       | EtOHcl2 | Galcl1 | -      | YPDnc2 | YPDnc3 | YPDnc4 | -       | -       | Galnc1 | Galnc2 |
| 8 KTI11  | YBL071W-/- | -      | YPDcl3 | -       | -       | -      | YPDnc1 | YPDnc2 | YPDnc3 | -      | EtOHnc1 | EtOHnc2 | Galnc1 | Galnc2 |
| 8 SEO1   | YAL067C    | YPDcl2 | -      | EtOHcl1 | -       | Galcl1 | YPDnc1 | -      | -      | -      | EtOHnc1 | EtOHnc2 | Galnc1 | Galnc2 |
| 8 MRPL27 | YBR282W    | -      | YPDcl3 | EtOHcl1 | EtOHcl2 | Galcl1 | -      | -      | -      | -      | EtOHnc1 | EtOHnc2 | Galnc1 | Galnc2 |
| 8 YCP4   | YCR004C    | YPDcl2 | YPDcl3 | -       | -       | Galcl1 | YPDnc1 | -      | -      | YPDnc4 | EtOHnc1 | EtOHnc2 | Galnc1 | -      |
| 8 YPT11  | YNL304W    | YPDcl2 | YPDcl3 | EtOHcl1 | EtOHcl2 | Galcl1 | YPDnc1 | YPDnc2 | -      | YPDnc4 | -       | -       | -      | -      |
| 8 SCS7   | YMR272C    | YPDcl2 | -      | EtOHcl1 | -       | Galcl1 | -      | YPDnc2 | YPDnc3 | YPDnc4 | -       | -       | Galnc1 | Galnc2 |
| 8        | YKR041W    | -      | -      | EtOHcl1 | -       | -      | YPDnc1 | YPDnc2 | YPDnc3 | YPDnc4 | EtOHnc1 | EtOHnc2 | -      | Galnc2 |
| 8        | YGR146C    | -      | -      | EtOHcl1 | -       | -      | YPDnc1 | YPDnc2 | -      | YPDnc4 | EtOHnc1 | EtOHnc2 | Galnc1 | Galnc2 |
| 8 GIP3   | YPL137C    | YPDcl2 | -      | EtOHcl1 | -       | Galcl1 | YPDnc1 | YPDnc2 | -      | YPDnc4 | EtOHnc1 | -       | -      | Galnc2 |
| 8 SYS1   | YJL004C    | -      | -      | -       | -       | Galcl1 | YPDnc1 | YPDnc2 | -      | YPDnc4 | EtOHnc1 | EtOHnc2 | Galnc1 | Galnc2 |
| 8 AIM19  | YIL087C    | YPDcl2 | YPDcl3 | EtOHcl1 | -       | Galcl1 | -      | YPDnc2 | YPDnc3 | YPDnc4 | -       | -       | -      | Galnc2 |
| 8 ENB1   | YOL158C    | -      | -      | EtOHcl1 | -       | -      | -      | YPDnc2 | YPDnc3 | YPDnc4 | EtOHnc1 | EtOHnc2 | Galnc1 | Galnc2 |
| 8        | YOR318C    | -      | YPDcl3 | EtOHcl1 | EtOHcl2 | Galcl1 | -      | -      | YPDnc3 | YPDnc4 | -       | EtOHnc2 | -      | Galnc2 |
| 8 ERG6   | YML008C    | -      | YPDcl3 | -       | EtOHcl2 | -      | YPDnc1 | -      | YPDnc3 | -      | EtOHnc1 | EtOHnc2 | Galnc1 | Galnc2 |
| 8        | YBR196C-A  | -      | -      | EtOHcl1 | -       | Galcl1 | YPDnc1 | YPDnc2 | YPDnc3 | -      | EtOHnc1 | EtOHnc2 | -      | Galnc2 |
| 8 SPE3   | YPR069C    | YPDcl2 | YPDcl3 | EtOHcl1 | EtOHcl2 | Galcl1 | YPDnc1 | -      | YPDnc3 | -      | -       | -       | Galnc1 | -      |
| 8 BFA1   | YJR053W    | -      | -      | -       | -       | Galcl1 | YPDnc1 | YPDnc2 | YPDnc3 | YPDnc4 | EtOHnc1 | -       | Galnc1 | Galnc2 |
| 8        | YGR126W    | -      | -      | -       | -       | Galcl1 | YPDnc1 | YPDnc2 | YPDnc3 | YPDnc4 | EtOHnc1 | -       | Galnc1 | Galnc2 |
| 8 SSZ1   | YHR064C    | YPDcl2 | -      | EtOHcl1 | EtOHcl2 | Galcl1 | YPDnc1 | -      | -      | -      | -       | EtOHnc2 | Galnc1 | Galnc2 |
| 8 MED1   | YPR070W    | -      | YPDcl3 | EtOHcl1 | EtOHcl2 | -      | YPDnc1 | YPDnc2 | -      | -      | EtOHnc1 | -       | Galnc1 | Galnc2 |
| 8 RSF1   | YMR030W    | YPDcl2 | YPDcl3 | -       | EtOHcl2 | Galcl1 | YPDnc1 | -      | -      | -      | EtOHnc1 | -       | Galnc1 | Galnc2 |
| 8        | YHR078W    | YPDcl2 | -      | -       | EtOHcl2 | Galcl1 | YPDnc1 | YPDnc2 | -      | -      | EtOHnc1 | -       | Galnc1 | Galnc2 |
| 8 RRT12  | YCR045C    | -      | -      | EtOHcl1 | -       | -      | YPDnc1 | YPDnc2 | YPDnc3 | -      | EtOHnc1 | EtOHnc2 | Galnc1 | Galnc2 |

|   |       |           |        |        |         |         |        |        |        |        |        |         |         |        |        |
|---|-------|-----------|--------|--------|---------|---------|--------|--------|--------|--------|--------|---------|---------|--------|--------|
| 8 | ATO3  | YDR384C   | -      | YPDcl3 | -       | -       | Galcl1 | YPDnc1 | -      | -      | YPDnc4 | EtOHnc1 | EtOHnc2 | Galnc1 | Galnc2 |
| 8 | FYV1  | YDR024W   | -      | -      | EtOHcl1 | -       | -      | -      | YPDnc2 | YPDnc3 | YPDnc4 | EtOHnc1 | EtOHnc2 | Galnc1 | Galnc2 |
| 8 |       | YFL040W   | -      | -      | EtOHcl1 | -       | -      | YPDnc1 | -      | YPDnc3 | YPDnc4 | EtOHnc1 | EtOHnc2 | Galnc1 | Galnc2 |
| 8 | HAP4  | YKL109W   | -      | -      | EtOHcl1 | -       | Galcl1 | YPDnc1 | YPDnc2 | YPDnc3 | YPDnc4 | -       | -       | Galnc1 | Galnc2 |
| 8 | BNA5  | YLR231C   | YPDcl2 | -      | EtOHcl1 | -       | Galcl1 | YPDnc1 | YPDnc2 | -      | YPDnc4 | EtOHnc1 | -       | -      | Galnc2 |
| 8 | GRX3  | YDR098C   | YPDcl2 | YPDcl3 | EtOHcl1 | EtOHcl2 | Galcl1 | -      | -      | -      | -      | EtOHnc1 | -       | Galnc1 | Galnc2 |
| 8 | QDR1  | YIL120W   | YPDcl2 | -      | EtOHcl1 | -       | -      | YPDnc1 | YPDnc2 | YPDnc3 | -      | EtOHnc1 | -       | Galnc1 | Galnc2 |
| 8 | WTM1  | YOR230W   | -      | YPDcl3 | -       | -       | Galcl1 | -      | -      | YPDnc3 | YPDnc4 | EtOHnc1 | EtOHnc2 | Galnc1 | Galnc2 |
| 8 | KIN28 | YDL108W   | YPDcl2 | YPDcl3 | EtOHcl1 | EtOHcl2 | Galcl1 | -      | YPDnc2 | YPDnc3 | YPDnc4 | -       | -       | -      | -      |
| 8 |       | YPR159C-A | YPDcl2 | -      | EtOHcl1 | -       | -      | YPDnc1 | YPDnc2 | YPDnc3 | -      | EtOHnc1 | -       | Galnc1 | Galnc2 |
| 8 | CLU1  | YMR012W   | YPDcl2 | YPDcl3 | EtOHcl1 | -       | Galcl1 | -      | -      | -      | YPDnc4 | EtOHnc1 | EtOHnc2 | -      | Galnc2 |
| 8 |       | YBL071C   | -      | YPDcl3 | -       | EtOHcl2 | -      | YPDnc1 | YPDnc2 | -      | YPDnc4 | EtOHnc1 | -       | Galnc1 | Galnc2 |
| 8 |       | YHR086W-  | -      | -      | -       | -       | Galcl1 | YPDnc1 | -      | YPDnc3 | YPDnc4 | EtOHnc1 | EtOHnc2 | Galnc1 | Galnc2 |
| 8 | TDA2  | YER071C   | -      | -      | -       | EtOHcl2 | -      | YPDnc1 | -      | YPDnc3 | YPDnc4 | EtOHnc1 | EtOHnc2 | Galnc1 | Galnc2 |
| 8 | HRQ1  | YDR291W   | YPDcl2 | YPDcl3 | -       | -       | Galcl1 | -      | YPDnc2 | YPDnc3 | -      | -       | EtOHnc2 | Galnc1 | Galnc2 |
| 8 |       | YOR203W   | YPDcl2 | YPDcl3 | -       | EtOHcl2 | Galcl1 | -      | -      | -      | -      | EtOHnc1 | EtOHnc2 | Galnc1 | Galnc2 |
| 8 | MET7  | YOR241W   | YPDcl2 | -      | EtOHcl1 | -       | Galcl1 | -      | YPDnc2 | YPDnc3 | -      | -       | EtOHnc2 | Galnc1 | Galnc2 |
| 8 | TAH11 | YJR046W   | YPDcl2 | YPDcl3 | EtOHcl1 | -       | -      | -      | -      | YPDnc3 | YPDnc4 | -       | EtOHnc2 | Galnc1 | Galnc2 |
| 8 |       | YPL136W   | YPDcl2 | -      | EtOHcl1 | -       | Galcl1 | YPDnc1 | YPDnc2 | -      | YPDnc4 | EtOHnc1 | -       | -      | Galnc2 |
| 8 |       | YGL036W   | -      | YPDcl3 | EtOHcl1 | EtOHcl2 | -      | YPDnc1 | -      | YPDnc3 | -      | EtOHnc1 | -       | Galnc1 | Galnc2 |
| 8 | AAD16 | YFL057C   | YPDcl2 | YPDcl3 | EtOHcl1 | EtOHcl2 | Galcl1 | YPDnc1 | -      | -      | -      | EtOHnc1 | -       | Galnc1 | -      |
| 8 | ARA1  | YBR149W   | -      | YPDcl3 | EtOHcl1 | EtOHcl2 | Galcl1 | YPDnc1 | -      | -      | -      | EtOHnc1 | EtOHnc2 | Galnc1 | -      |
| 8 | MPP6  | YNR024W   | YPDcl2 | YPDcl3 | EtOHcl1 | EtOHcl2 | Galcl1 | -      | -      | YPDnc3 | -      | EtOHnc1 | -       | -      | Galnc2 |
| 8 | SPG1  | YGR236C   | YPDcl2 | -      | -       | -       | -      | YPDnc1 | YPDnc2 | YPDnc3 | -      | EtOHnc1 | EtOHnc2 | Galnc1 | Galnc2 |
| 8 | SIW14 | YNL032W   | -      | -      | EtOHcl1 | EtOHcl2 | -      | YPDnc1 | YPDnc2 | YPDnc3 | YPDnc4 | -       | -       | Galnc1 | Galnc2 |
| 8 | RPL30 | YGL030W   | YPDcl2 | -      | EtOHcl1 | -       | Galcl1 | -      | YPDnc2 | YPDnc3 | YPDnc4 | -       | EtOHnc2 | -      | Galnc2 |
| 8 |       | YAL016C-B | -      | YPDcl3 | EtOHcl1 | EtOHcl2 | Galcl1 | YPDnc1 | -      | YPDnc3 | -      | EtOHnc1 | -       | -      | Galnc2 |
| 8 | PHM8  | YER037W   | -      | YPDcl3 | -       | EtOHcl2 | Galcl1 | -      | YPDnc2 | -      | -      | EtOHnc1 | EtOHnc2 | Galnc1 | Galnc2 |
| 8 |       | YML034C-A | -      | -      | EtOHcl1 | -       | -      | YPDnc1 | YPDnc2 | YPDnc3 | -      | EtOHnc1 | EtOHnc2 | Galnc1 | Galnc2 |
| 8 | YOS9  | YDR057W   | YPDcl2 | -      | -       | -       | Galcl1 | YPDnc1 | -      | YPDnc3 | YPDnc4 | EtOHnc1 | EtOHnc2 | Galnc1 | -      |
| 8 | RAV2  | YDR202C   | YPDcl2 | -      | -       | EtOHcl2 | Galcl1 | -      | YPDnc2 | -      | YPDnc4 | EtOHnc1 | EtOHnc2 | -      | Galnc2 |
| 8 | BUD7  | YOR299W   | -      | -      | -       | EtOHcl2 | -      | YPDnc1 | -      | YPDnc3 | YPDnc4 | EtOHnc1 | EtOHnc2 | Galnc1 | Galnc2 |
| 8 |       | YML002W   | YPDcl2 | -      | -       | EtOHcl2 | Galcl1 | YPDnc1 | YPDnc2 | -      | YPDnc4 | EtOHnc1 | -       | Galnc1 | -      |
| 8 |       | YPL150W   | YPDcl2 | YPDcl3 | EtOHcl1 | EtOHcl2 | Galcl1 | -      | -      | -      | -      | EtOHnc1 | -       | Galnc1 | Galnc2 |

|   |         |           |        |        |         |         |        |        |        |        |         |         |         |        |        |
|---|---------|-----------|--------|--------|---------|---------|--------|--------|--------|--------|---------|---------|---------|--------|--------|
| 8 | YPL199C | YPDcl2    | YPDcl3 | -      | -       | Galcl1  | YPDnc1 | -      | -      | YPDnc4 | EtOHnc1 | EtOHnc2 | Galnc1  | -      |        |
| 8 | PDB1    | YBR221C   | -      | -      | EtOHcl1 | -       | Galcl1 | YPDnc1 | -      | -      | YPDnc4  | EtOHnc1 | EtOHnc2 | Galnc1 | Galnc2 |
| 8 | LSM3    | YLR438C-A | -      | YPDcl3 | -       | -       | Galcl1 | YPDnc1 | YPDnc2 | -      | -       | EtOHnc1 | EtOHnc2 | Galnc1 | Galnc2 |
| 8 | PCL8    | YPL219W   | -      | YPDcl3 | EtOHcl1 | EtOHcl2 | Galcl1 | YPDnc1 | -      | -      | YPDnc4  | EtOHnc1 | -       | Galnc1 | -      |
| 8 | CYB2    | YML054C   | YPDcl2 | YPDcl3 | EtOHcl1 | -       | Galcl1 | YPDnc1 | -      | YPDnc3 | -       | -       | -       | Galnc1 | Galnc2 |
| 8 |         | YBL108W   | YPDcl2 | -      | -       | -       | Galcl1 | YPDnc1 | YPDnc2 | YPDnc3 | -       | EtOHnc1 | -       | Galnc1 | Galnc2 |
| 8 |         | YMR124W   | YPDcl2 | YPDcl3 | EtOHcl1 | -       | Galcl1 | -      | -      | -      | YPDnc4  | EtOHnc1 | EtOHnc2 | Galnc1 | -      |
| 8 |         | YNR063W   | YPDcl2 | -      | EtOHcl1 | EtOHcl2 | -      | YPDnc1 | -      | -      | YPDnc4  | -       | EtOHnc2 | Galnc1 | Galnc2 |
| 8 | YEL1    | YBL060W   | YPDcl2 | YPDcl3 | EtOHcl1 | EtOHcl2 | Galcl1 | YPDnc1 | -      | -      | YPDnc4  | -       | -       | Galnc1 | -      |
| 8 | RFC5    | YBR087W   | -      | YPDcl3 | -       | -       | -      | YPDnc1 | YPDnc2 | YPDnc3 | YPDnc4  | EtOHnc1 | -       | Galnc1 | Galnc2 |
| 8 | FMP23   | YBR047W   | YPDcl2 | YPDcl3 | EtOHcl1 | EtOHcl2 | Galcl1 | YPDnc1 | -      | -      | YPDnc4  | -       | -       | Galnc1 | -      |
| 8 | API2    | YDR525W   | -      | -      | EtOHcl1 | -       | Galcl1 | YPDnc1 | YPDnc2 | YPDnc3 | -       | EtOHnc1 | -       | Galnc1 | Galnc2 |
| 8 | OSH6    | YKR003W   | YPDcl2 | YPDcl3 | -       | EtOHcl2 | Galcl1 | -      | YPDnc2 | -      | YPDnc4  | -       | EtOHnc2 | Galnc1 | -      |
| 8 | YRB1    | YDR002W   | YPDcl2 | YPDcl3 | EtOHcl1 | -       | Galcl1 | YPDnc1 | -      | -      | -       | EtOHnc1 | EtOHnc2 | -      | Galnc2 |
| 8 | YPT7    | YML001W   | YPDcl2 | -      | -       | EtOHcl2 | Galcl1 | YPDnc1 | -      | -      | YPDnc4  | EtOHnc1 | EtOHnc2 | Galnc1 | -      |
| 8 | ERP2    | YAL007C   | YPDcl2 | YPDcl3 | EtOHcl1 | EtOHcl2 | Galcl1 | -      | -      | -      | -       | EtOHnc1 | EtOHnc2 | Galnc1 | -      |
| 8 | SPS18   | YNL204C   | -      | -      | EtOHcl1 | -       | -      | YPDnc1 | YPDnc2 | YPDnc3 | YPDnc4  | EtOHnc1 | EtOHnc2 | Galnc1 | -      |
| 8 | CIS1    | YDR022C   | -      | -      | -       | EtOHcl2 | Galcl1 | -      | YPDnc2 | -      | YPDnc4  | EtOHnc1 | EtOHnc2 | Galnc1 | Galnc2 |
| 8 | APD1    | YBR151W   | -      | -      | EtOHcl1 | -       | Galcl1 | YPDnc1 | YPDnc2 | -      | -       | EtOHnc1 | EtOHnc2 | Galnc1 | Galnc2 |
| 8 |         | YOL163W   | YPDcl2 | YPDcl3 | -       | -       | -      | YPDnc1 | -      | YPDnc3 | YPDnc4  | EtOHnc1 | -       | Galnc1 | Galnc2 |
| 8 | TED1    | YIL039W   | YPDcl2 | -      | -       | -       | Galcl1 | YPDnc1 | -      | -      | YPDnc4  | EtOHnc1 | EtOHnc2 | Galnc1 | Galnc2 |
| 8 | COR1    | YBL045C   | YPDcl2 | -      | EtOHcl1 | -       | -      | YPDnc1 | -      | YPDnc3 | YPDnc4  | -       | EtOHnc2 | Galnc1 | Galnc2 |
| 8 | TVP18   | YMR071C   | YPDcl2 | YPDcl3 | EtOHcl1 | -       | Galcl1 | -      | YPDnc2 | YPDnc3 | YPDnc4  | -       | EtOHnc2 | -      | -      |
| 8 | SIF2    | YBR103W   | YPDcl2 | -      | EtOHcl1 | -       | -      | YPDnc1 | YPDnc2 | YPDnc3 | YPDnc4  | EtOHnc1 | -       | -      | Galnc2 |
| 8 | NYV1    | YLR093C   | -      | YPDcl3 | EtOHcl1 | -       | -      | YPDnc1 | YPDnc2 | -      | -       | EtOHnc1 | EtOHnc2 | Galnc1 | Galnc2 |
| 8 | KCC4    | YCL024W   | -      | -      | EtOHcl1 | -       | -      | YPDnc1 | YPDnc2 | YPDnc3 | -       | EtOHnc1 | EtOHnc2 | Galnc1 | Galnc2 |
| 8 | HAC1    | YFL031W   | YPDcl2 | YPDcl3 | -       | EtOHcl2 | -      | YPDnc1 | -      | YPDnc3 | YPDnc4  | -       | -       | Galnc1 | Galnc2 |
| 8 |         | YDR094W   | YPDcl2 | YPDcl3 | EtOHcl1 | EtOHcl2 | -      | -      | YPDnc2 | YPDnc3 | -       | -       | EtOHnc2 | -      | Galnc2 |
| 8 | PDC5    | YLR134W   | -      | -      | -       | -       | Galcl1 | YPDnc1 | -      | YPDnc3 | YPDnc4  | EtOHnc1 | EtOHnc2 | Galnc1 | Galnc2 |
| 8 |         | YGL069C   | YPDcl2 | YPDcl3 | -       | EtOHcl2 | Galcl1 | -      | YPDnc2 | YPDnc3 | -       | -       | EtOHnc2 | -      | Galnc2 |
| 8 |         | YGR107W   | -      | -      | -       | EtOHcl2 | Galcl1 | YPDnc1 | YPDnc2 | -      | YPDnc4  | EtOHnc1 | -       | Galnc1 | Galnc2 |
| 8 |         | YJL086C   | YPDcl2 | -      | EtOHcl1 | -       | Galcl1 | YPDnc1 | YPDnc2 | YPDnc3 | YPDnc4  | -       | EtOHnc2 | -      | -      |
| 8 | YHI9    | YHR029C   | YPDcl2 | -      | EtOHcl1 | -       | Galcl1 | YPDnc1 | -      | YPDnc3 | YPDnc4  | EtOHnc1 | -       | -      | Galnc2 |
| 8 | RPL5    | YPL131W   | YPDcl2 | -      | EtOHcl1 | -       | Galcl1 | -      | YPDnc2 | YPDnc3 | YPDnc4  | -       | EtOHnc2 | Galnc1 | -      |

|   |         |         |        |         |         |         |        |        |        |        |         |         |         |               |
|---|---------|---------|--------|---------|---------|---------|--------|--------|--------|--------|---------|---------|---------|---------------|
| 8 | YPL073C | -       | -      | EtOHcl1 | -       | Galcl1  | YPDnc1 | -      | YPDnc3 | YPDnc4 | EtOHnc1 | EtOHnc2 | Galnc1  | -             |
| 8 | APE3    | YBR286W | YPDcl2 | YPDcl3  | EtOHcl1 | -       | Galcl1 | -      | -      | -      | YPDnc4  | EtOHnc1 | -       | Galnc1 Galnc2 |
| 8 | YPL238C | -       | -      | -       | -       | -       | YPDnc1 | YPDnc2 | YPDnc3 | YPDnc4 | EtOHnc1 | EtOHnc2 | Galnc1  | Galnc2        |
| 8 | SSB1    | YDL229W | -      | -       | -       | -       | YPDnc1 | YPDnc2 | YPDnc3 | YPDnc4 | EtOHnc1 | EtOHnc2 | Galnc1  | Galnc2        |
| 8 | PAU3    | YCR104W | -      | YPDcl3  | EtOHcl1 | -       | -      | YPDnc1 | -      | YPDnc3 | YPDnc4  | EtOHnc1 | -       | Galnc1 Galnc2 |
| 8 | DGR2    | YKL121W | -      | -       | EtOHcl1 | -       | -      | YPDnc1 | YPDnc2 | YPDnc3 | -       | EtOHnc1 | EtOHnc2 | Galnc1 Galnc2 |
| 7 | YPR098C | YPDcl2  | YPDcl3 | -       | EtOHcl2 | Galcl1  | -      | -      | -      | YPDnc4 | -       | EtOHnc2 | Galnc1  | -             |
| 7 | YGR190C | -       | YPDcl3 | EtOHcl1 | -       | Galcl1  | YPDnc1 | -      | -      | -      | EtOHnc1 | -       | Galnc1  | Galnc2        |
| 7 | TOM1    | YDR457W | -      | -       | -       | -       | YPDnc1 | YPDnc2 | YPDnc3 | -      | EtOHnc1 | EtOHnc2 | Galnc1  | Galnc2        |
| 7 | MUP1    | YGR055W | YPDcl2 | -       | -       | -       | Galcl1 | YPDnc1 | YPDnc2 | -      | -       | EtOHnc1 | -       | Galnc1 Galnc2 |
| 7 | POS5    | YPL188W | YPDcl2 | -       | -       | -       | Galcl1 | YPDnc1 | YPDnc2 | YPDnc3 | YPDnc4  | -       | -       | Galnc1 -      |
| 7 | MCA1    | YOR197W | -      | -       | EtOHcl1 | -       | -      | YPDnc1 | -      | -      | YPDnc4  | EtOHnc1 | EtOHnc2 | Galnc1 Galnc2 |
| 7 | RPS1B   | YML063W | -      | -       | -       | -       | Galcl1 | YPDnc1 | YPDnc2 | YPDnc3 | YPDnc4  | EtOHnc1 | EtOHnc2 | - -           |
| 7 | YKR040C | -       | -      | EtOHcl1 | -       | -       | YPDnc1 | -      | YPDnc3 | -      | EtOHnc1 | EtOHnc2 | Galnc1  | Galnc2        |
| 7 | MRP8    | YKL142W | YPDcl2 | -       | EtOHcl1 | -       | Galcl1 | YPDnc1 | -      | -      | -       | EtOHnc1 | -       | Galnc1 Galnc2 |
| 7 | YMR244W | -       | YPDcl3 | -       | EtOHcl2 | -       | YPDnc1 | -      | -      | YPDnc4 | EtOHnc1 | -       | Galnc1  | Galnc2        |
| 7 | YDR246W | -       | -      | EtOHcl1 | -       | -       | YPDnc1 | YPDnc2 | YPDnc3 | YPDnc4 | -       | -       | Galnc1  | Galnc2        |
| 7 | SPP41   | YDR464W | YPDcl2 | YPDcl3  | EtOHcl1 | EtOHcl2 | Galcl1 | -      | -      | YPDnc3 | -       | -       | EtOHnc2 | - -           |
| 7 | HTA1    | YDR225W | -      | -       | EtOHcl1 | -       | -      | YPDnc1 | -      | YPDnc3 | YPDnc4  | EtOHnc1 | -       | Galnc1 Galnc2 |
| 7 | HMS1    | YOR032C | -      | -       | EtOHcl1 | -       | -      | YPDnc1 | YPDnc2 | YPDnc3 | YPDnc4  | -       | -       | Galnc1 Galnc2 |
| 7 | KTR3    | YBR205W | -      | -       | -       | -       | Galcl1 | -      | -      | YPDnc3 | YPDnc4  | EtOHnc1 | EtOHnc2 | Galnc1 Galnc2 |
| 7 | YGR069W | -       | -      | EtOHcl1 | -       | -       | YPDnc1 | YPDnc2 | YPDnc3 | -      | EtOHnc1 | -       | Galnc1  | Galnc2        |
| 7 | ALD4    | YOR374W | -      | YPDcl3  | -       | EtOHcl2 | -      | YPDnc1 | -      | -      | -       | EtOHnc1 | EtOHnc2 | Galnc1 Galnc2 |
| 7 | YLR345W | YPDcl2  | -      | EtOHcl1 | -       | Galcl1  | -      | -      | -      | YPDnc4 | EtOHnc1 | EtOHnc2 | -       | Galnc2        |
| 7 | YOR072W | YPDcl2  | YPDcl3 | -       | -       | Galcl1  | YPDnc1 | -      | -      | -      | EtOHnc1 | -       | Galnc1  | Galnc2        |
| 7 | FCY2    | YER056C | -      | -       | EtOHcl1 | -       | Galcl1 | -      | -      | -      | YPDnc4  | EtOHnc1 | EtOHnc2 | Galnc1 Galnc2 |
| 7 | RPS14B  | YJL191W | -      | YPDcl3  | EtOHcl1 | EtOHcl2 | -      | -      | YPDnc2 | YPDnc3 | -       | -       | EtOHnc2 | - Galnc2      |
| 7 | ARH1    | YDR376W | -      | -       | EtOHcl1 | -       | Galcl1 | YPDnc1 | -      | YPDnc3 | -       | EtOHnc1 | -       | Galnc1 Galnc2 |
| 7 | YNR065C | YPDcl2  | YPDcl3 | -       | EtOHcl2 | Galcl1  | YPDnc1 | -      | -      | -      | -       | -       | Galnc1  | Galnc2        |
| 7 | VHS3    | YOR054C | YPDcl2 | -       | EtOHcl1 | -       | -      | YPDnc1 | YPDnc2 | YPDnc3 | YPDnc4  | -       | -       | - Galnc2      |
| 7 | YLL065W | YPDcl2  | YPDcl3 | EtOHcl1 | EtOHcl2 | Galcl1  | -      | -      | -      | YPDnc4 | -       | EtOHnc2 | -       | -             |
| 7 | RIB7    | YBR153W | -      | -       | -       | EtOHcl2 | Galcl1 | YPDnc1 | -      | YPDnc3 | -       | EtOHnc1 | -       | Galnc1 Galnc2 |
| 7 | RPL15B  | YMR121C | -      | -       | EtOHcl1 | -       | -      | YPDnc1 | YPDnc2 | -      | YPDnc4  | EtOHnc1 | -       | Galnc1 Galnc2 |
| 7 | YIL054W | -       | -      | EtOHcl1 | EtOHcl2 | Galcl1  | YPDnc1 | -      | -      | -      | EtOHnc1 | -       | Galnc1  | Galnc2        |

|             |         |        |        |         |         |        |        |        |        |        |         |         |        |        |
|-------------|---------|--------|--------|---------|---------|--------|--------|--------|--------|--------|---------|---------|--------|--------|
| 7 ARR3      | YPR201W | YPDcl2 | -      | -       | EtOHcl2 | Galcl1 | YPDnc1 | -      | -      | YPDnc4 | -       | -       | Galnc1 | Galnc2 |
| 7 SLD2      | YKL108W | -      | -      | EtOHcl1 | -       | Galcl1 | YPDnc1 | YPDnc2 | -      | -      | EtOHnc1 | -       | Galnc1 | Galnc2 |
| 7 DDR48     | YMR173W | YPDcl2 | YPDcl3 | -       | EtOHcl2 | Galcl1 | -      | YPDnc2 | YPDnc3 | YPDnc4 | -       | -       | -      | -      |
| 7 DOT6      | YER088C | -      | -      | EtOHcl1 | EtOHcl2 | -      | YPDnc1 | YPDnc2 | YPDnc3 | -      | -       | EtOHnc2 | -      | Galnc2 |
| 7 UTP6      | YDR449C | YPDcl2 | YPDcl3 | EtOHcl1 | EtOHcl2 | Galcl1 | -      | YPDnc2 | -      | YPDnc4 | -       | -       | -      | -      |
| 7 RGP1      | YDR137W | -      | -      | EtOHcl1 | -       | Galcl1 | -      | YPDnc2 | YPDnc3 | YPDnc4 | -       | -       | Galnc1 | Galnc2 |
| 7           | YHR032W | YPDcl2 | -      | EtOHcl1 | -       | -      | YPDnc1 | YPDnc2 | YPDnc3 | YPDnc4 | EtOHnc1 | -       | -      | -      |
| 7 RPB5      | YBR154C | -      | YPDcl3 | -       | EtOHcl2 | Galcl1 | -      | -      | -      | -      | EtOHnc1 | EtOHnc2 | Galnc1 | Galnc2 |
| 7 BAR1      | YIL015W | YPDcl2 | YPDcl3 | -       | -       | Galcl1 | -      | YPDnc2 | -      | YPDnc4 | EtOHnc1 | EtOHnc2 | -      | -      |
| 7 RPR2      | YIR015W | -      | YPDcl3 | EtOHcl1 | -       | -      | YPDnc1 | YPDnc2 | -      | -      | EtOHnc1 | EtOHnc2 | -      | Galnc2 |
| 7 RPL20A    | YMR242C | YPDcl2 | -      | EtOHcl1 | EtOHcl2 | -      | -      | -      | YPDnc3 | -      | EtOHnc1 | -       | Galnc1 | Galnc2 |
| 7 RPS24B    | YIL069C | -      | -      | EtOHcl1 | -       | -      | YPDnc1 | YPDnc2 | -      | YPDnc4 | -       | EtOHnc2 | Galnc1 | Galnc2 |
| 7           | YDR307W | -      | -      | EtOHcl1 | EtOHcl2 | Galcl1 | -      | -      | -      | YPDnc4 | EtOHnc1 | EtOHnc2 | -      | Galnc2 |
| 7 DPH2      | YKL191W | -      | -      | EtOHcl1 | EtOHcl2 | Galcl1 | -      | -      | -      | YPDnc4 | EtOHnc1 | EtOHnc2 | Galnc1 | -      |
| 7           | YPR123C | -      | -      | -       | -       | Galcl1 | YPDnc1 | YPDnc2 | YPDnc3 | -      | EtOHnc1 | -       | Galnc1 | Galnc2 |
| 7 SAH1      | YER043C | YPDcl2 | YPDcl3 | EtOHcl1 | EtOHcl2 | Galcl1 | -      | -      | -      | -      | -       | -       | Galnc1 | Galnc2 |
| 7 PUP2      | YGR253C | YPDcl2 | -      | EtOHcl1 | EtOHcl2 | Galcl1 | YPDnc1 | YPDnc2 | YPDnc3 | -      | -       | -       | -      | -      |
| 7 ROM2      | YLR371W | -      | -      | EtOHcl1 | -       | Galcl1 | -      | -      | YPDnc3 | YPDnc4 | EtOHnc1 | -       | Galnc1 | Galnc2 |
| 7 VPS13     | YLL040C | YPDcl2 | -      | EtOHcl1 | EtOHcl2 | Galcl1 | YPDnc1 | -      | -      | YPDnc4 | -       | -       | -      | Galnc2 |
| 7 SNF7      | YLR025W | -      | -      | -       | EtOHcl2 | -      | YPDnc1 | YPDnc2 | YPDnc3 | -      | EtOHnc1 | -       | Galnc1 | Galnc2 |
| 7 EDC2      | YER035W | -      | YPDcl3 | -       | -       | Galcl1 | YPDnc1 | -      | -      | -      | EtOHnc1 | EtOHnc2 | Galnc1 | Galnc2 |
| 7 MF(ALPHA) | YPL187W | YPDcl2 | -      | -       | -       | -      | YPDnc1 | YPDnc2 | YPDnc3 | YPDnc4 | -       | -       | Galnc1 | Galnc2 |
| 7 TDA6      | YPR157W | YPDcl2 | YPDcl3 | -       | EtOHcl2 | Galcl1 | -      | -      | YPDnc3 | -      | -       | EtOHnc2 | Galnc1 | -      |
| 7           | YIL055C | -      | YPDcl3 | EtOHcl1 | -       | Galcl1 | -      | -      | YPDnc3 | YPDnc4 | -       | EtOHnc2 | -      | Galnc2 |
| 7           | YMR320W | YPDcl2 | -      | -       | -       | -      | YPDnc1 | YPDnc2 | YPDnc3 | -      | EtOHnc1 | EtOHnc2 | -      | Galnc2 |
| 7 IDH1      | YNL037C | YPDcl2 | -      | EtOHcl1 | -       | Galcl1 | YPDnc1 | YPDnc2 | -      | -      | -       | EtOHnc2 | Galnc1 | -      |
| 7 DSE3      | YOR264W | YPDcl2 | -      | EtOHcl1 | -       | -      | -      | YPDnc2 | YPDnc3 | YPDnc4 | EtOHnc1 | -       | Galnc1 | -      |
| 7 MAM33     | YIL070C | -      | -      | EtOHcl1 | -       | -      | YPDnc1 | YPDnc2 | -      | YPDnc4 | -       | EtOHnc2 | Galnc1 | Galnc2 |
| 7 CST9      | YLR394W | YPDcl2 | YPDcl3 | EtOHcl1 | -       | Galcl1 | -      | YPDnc2 | YPDnc3 | YPDnc4 | -       | -       | -      | -      |
| 7 LYS20     | YDL182W | YPDcl2 | YPDcl3 | EtOHcl1 | -       | Galcl1 | YPDnc1 | YPDnc2 | -      | -      | -       | -       | -      | Galnc2 |
| 7 RGT2      | YDL138W | YPDcl2 | -      | EtOHcl1 | EtOHcl2 | Galcl1 | -      | -      | YPDnc3 | -      | EtOHnc1 | -       | -      | Galnc2 |
| 7 FRE8      | YLR047C | -      | YPDcl3 | EtOHcl1 | EtOHcl2 | -      | -      | YPDnc2 | YPDnc3 | -      | -       | EtOHnc2 | -      | Galnc2 |
| 7 RPS31     | YLR167W | -      | YPDcl3 | EtOHcl1 | -       | -      | YPDnc1 | YPDnc2 | YPDnc3 | YPDnc4 | -       | -       | Galnc1 | -      |
| 7 TDA11     | YHR159W | -      | YPDcl3 | EtOHcl1 | -       | Galcl1 | -      | YPDnc2 | -      | YPDnc4 | -       | -       | Galnc1 | Galnc2 |

|   |           |           |        |         |         |         |        |        |        |        |         |         |         |        |
|---|-----------|-----------|--------|---------|---------|---------|--------|--------|--------|--------|---------|---------|---------|--------|
| 7 | YNL226W   | YPDcl2    | -      | EtOHcl1 | EtOHcl2 | Galcl1  | -      | -      | -      | -      | -       | EtOHnc2 | Galnc1  | Galnc2 |
| 7 | RPL36B    | YPL249C-A | -      | -       | -       | Galcl1  | -      | YPDnc2 | YPDnc3 | -      | EtOHnc1 | EtOHnc2 | Galnc1  | Galnc2 |
| 7 | GLG2      | YJL137C   | YPDcl2 | YPDcl3  | EtOHcl1 | -       | Galcl1 | -      | YPDnc2 | YPDnc3 | YPDnc4  | -       | -       | -      |
| 7 | YDL185C-A | -         | -      | -       | EtOHcl2 | Galcl1  | YPDnc1 | -      | YPDnc3 | -      | EtOHnc1 | EtOHnc2 | Galnc1  | -      |
| 7 | RPS2      | YGL123W   | -      | -       | EtOHcl1 | -       | -      | YPDnc1 | YPDnc2 | YPDnc3 | -       | EtOHnc1 | EtOHnc2 | Galnc1 |
| 7 | STB1      | YNL309W   | -      | YPDcl3  | EtOHcl1 | -       | Galcl1 | YPDnc1 | -      | -      | -       | EtOHnc1 | EtOHnc2 | Galnc1 |
| 7 | YDR102C   | -         | YPDcl3 | -       | EtOHcl2 | Galcl1  | YPDnc1 | -      | -      | -      | EtOHnc1 | -       | Galnc1  | Galnc2 |
| 7 | DGR1      | YNL130C-A | YPDcl2 | YPDcl3  | EtOHcl1 | EtOHcl2 | Galcl1 | -      | -      | -      | YPDnc4  | -       | EtOHnc2 | -      |
| 7 | PAU8      | YAL068C   | -      | YPDcl3  | -       | -       | Galcl1 | YPDnc1 | -      | YPDnc3 | -       | EtOHnc1 | -       | Galnc1 |
| 7 | HOP1      | YIL072W   | -      | -       | -       | -       | Galcl1 | YPDnc1 | YPDnc2 | YPDnc3 | YPDnc4  | -       | -       | Galnc1 |
| 7 | MYO2      | YOR326W   | YPDcl2 | YPDcl3  | EtOHcl1 | -       | Galcl1 | -      | -      | -      | -       | EtOHnc1 | EtOHnc2 | -      |
| 7 | YLR282C   | -         | -      | -       | -       | -       | YPDnc1 | YPDnc2 | YPDnc3 | YPDnc4 | EtOHnc1 | EtOHnc2 | -       | Galnc2 |
| 7 | FOB1      | YDR110W   | -      | -       | -       | -       | -      | YPDnc1 | YPDnc2 | YPDnc3 | -       | EtOHnc1 | EtOHnc2 | Galnc1 |
| 7 | YIR014W   | -         | YPDcl3 | EtOHcl1 | -       | -       | YPDnc1 | -      | -      | -      | -       | EtOHnc1 | EtOHnc2 | Galnc1 |
| 7 | SEC15     | YGL233W   | -      | -       | -       | EtOHcl2 | Galcl1 | -      | YPDnc2 | -      | -       | EtOHnc1 | EtOHnc2 | Galnc1 |
| 7 | RKM3      | YBR030W   | YPDcl2 | YPDcl3  | EtOHcl1 | -       | Galcl1 | YPDnc1 | YPDnc2 | YPDnc3 | -       | -       | -       | -      |
| 7 | NPT1      | YOR209C   | YPDcl2 | YPDcl3  | EtOHcl1 | EtOHcl2 | Galcl1 | -      | -      | -      | -       | EtOHnc1 | -       | Galnc1 |
| 7 | SSP1      | YHR184W   | YPDcl2 | -       | -       | -       | Galcl1 | YPDnc1 | YPDnc2 | YPDnc3 | -       | EtOHnc1 | -       | -      |
| 7 | FYV12     | YOR183W   | -      | -       | -       | -       | Galcl1 | YPDnc1 | -      | YPDnc3 | -       | EtOHnc1 | EtOHnc2 | Galnc1 |
| 7 | RTR2      | YDR066C   | YPDcl2 | YPDcl3  | EtOHcl1 | EtOHcl2 | Galcl1 | -      | -      | -      | YPDnc4  | -       | -       | -      |
| 7 | YBR089W   | -         | -      | -       | EtOHcl2 | Galcl1  | YPDnc1 | YPDnc2 | YPDnc3 | -      | EtOHnc1 | -       | Galnc1  | -      |
| 7 | RIM9      | YMR063W   | YPDcl2 | -       | -       | -       | Galcl1 | YPDnc1 | YPDnc2 | -      | -       | EtOHnc1 | EtOHnc2 | Galnc1 |
| 7 | NOP15     | YNL110C   | YPDcl2 | -       | EtOHcl1 | -       | Galcl1 | YPDnc1 | YPDnc2 | YPDnc3 | YPDnc4  | -       | -       | -      |
| 7 | SPE1      | YKL184W   | YPDcl2 | -       | EtOHcl1 | EtOHcl2 | Galcl1 | -      | -      | -      | YPDnc4  | EtOHnc1 | EtOHnc2 | -      |
| 7 | SUL2      | YLR092W   | -      | YPDcl3  | -       | -       | Galcl1 | YPDnc1 | -      | -      | YPDnc4  | EtOHnc1 | -       | Galnc1 |
| 7 | ERV1      | YGR029W   | YPDcl2 | YPDcl3  | -       | EtOHcl2 | Galcl1 | YPDnc1 | -      | -      | -       | EtOHnc1 | -       | -      |
| 7 | YDR274C   | YPDcl2    | -      | EtOHcl1 | -       | -       | Galcl1 | YPDnc1 | -      | YPDnc3 | -       | EtOHnc1 | -       | Galnc1 |
| 7 | BNI4      | YNL233W   | -      | -       | EtOHcl1 | -       | Galcl1 | YPDnc1 | -      | -      | YPDnc4  | EtOHnc1 | -       | Galnc1 |
| 7 | YAR030C   | YPDcl2    | YPDcl3 | EtOHcl1 | EtOHcl2 | -       | -      | -      | YPDnc2 | YPDnc3 | -       | -       | -       | Galnc1 |
| 7 | YLL020C   | -         | -      | -       | -       | -       | YPDnc1 | YPDnc2 | YPDnc3 | YPDnc4 | EtOHnc1 | -       | Galnc1  | Galnc2 |
| 7 | LYS21     | YDL131W   | YPDcl2 | YPDcl3  | EtOHcl1 | -       | Galcl1 | YPDnc1 | -      | YPDnc3 | YPDnc4  | -       | -       | -      |
| 7 | FTR1      | YER145C   | -      | YPDcl3  | EtOHcl1 | -       | -      | YPDnc1 | YPDnc2 | -      | -       | EtOHnc1 | -       | Galnc1 |
| 7 | YDR491C   | -         | -      | -       | -       | -       | Galcl1 | YPDnc1 | YPDnc2 | YPDnc3 | -       | EtOHnc1 | -       | Galnc1 |
| 7 | VTA1      | YLR181C   | -      | -       | -       | -       | -      | YPDnc1 | YPDnc2 | YPDnc3 | -       | EtOHnc1 | EtOHnc2 | Galnc1 |

|   |        |           |        |        |         |         |        |        |        |        |        |         |         |        |        |
|---|--------|-----------|--------|--------|---------|---------|--------|--------|--------|--------|--------|---------|---------|--------|--------|
| 7 | GSC2   | YGR032W   | YPDcl2 | -      | EtOHcl1 | EtOHcl2 | Galcl1 | -      | -      | -      | -      | EtOHnc1 | EtOHnc2 | Galnc1 | -      |
| 7 | PGM2   | YMR105C   | YPDcl2 | YPDcl3 | EtOHcl1 | -       | Galcl1 | -      | -      | -      | YPDnc4 | -       | -       | Galnc1 | Galnc2 |
| 7 |        | YCR085W   | -      | -      | -       | EtOHcl2 | Galcl1 | YPDnc1 | -      | -      | YPDnc4 | EtOHnc1 | -       | Galnc1 | Galnc2 |
| 7 |        | YMR031C   | YPDcl2 | YPDcl3 | EtOHcl1 | EtOHcl2 | Galcl1 | YPDnc1 | -      | -      | -      | -       | -       | -      | Galnc2 |
| 7 |        | YGL188C   | YPDcl2 | YPDcl3 | EtOHcl1 | -       | -      | -      | -      | -      | -      | EtOHnc1 | EtOHnc2 | Galnc1 | Galnc2 |
| 7 |        | YJL216C   | -      | -      | EtOHcl1 | -       | Galcl1 | -      | -      | YPDnc3 | YPDnc4 | EtOHnc1 | EtOHnc2 | Galnc1 | -      |
| 7 | HEM4   | YOR278W   | -      | YPDcl3 | -       | -       | -      | YPDnc1 | -      | -      | YPDnc4 | EtOHnc1 | EtOHnc2 | Galnc1 | Galnc2 |
| 7 | CPR3   | YML078W   | -      | YPDcl3 | -       | EtOHcl2 | Galcl1 | -      | -      | -      | YPDnc4 | -       | EtOHnc2 | Galnc1 | Galnc2 |
| 7 | KRE33  | YNL132W   | -      | YPDcl3 | -       | EtOHcl2 | Galcl1 | YPDnc1 | -      | -      | -      | EtOHnc1 | EtOHnc2 | Galnc1 | -      |
| 7 | PHO89  | YBR296C   | -      | YPDcl3 | EtOHcl1 | EtOHcl2 | -      | -      | -      | -      | YPDnc4 | EtOHnc1 | -       | Galnc1 | Galnc2 |
| 7 | UBC11  | YOR339C   | -      | -      | -       | EtOHcl2 | Galcl1 | -      | YPDnc2 | -      | -      | EtOHnc1 | EtOHnc2 | Galnc1 | Galnc2 |
| 7 | SNQ2   | YDR011W   | YPDcl2 | YPDcl3 | EtOHcl1 | EtOHcl2 | Galcl1 | -      | YPDnc2 | -      | YPDnc4 | -       | -       | -      | -      |
| 7 |        | YPL108W   | -      | -      | -       | -       | Galcl1 | -      | -      | YPDnc3 | YPDnc4 | EtOHnc1 | EtOHnc2 | Galnc1 | Galnc2 |
| 7 |        | YHR182C-A | -      | -      | EtOHcl1 | -       | -      | YPDnc1 | YPDnc2 | -      | YPDnc4 | EtOHnc1 | EtOHnc2 | -      | Galnc2 |
| 7 |        | YFR039C   | -      | YPDcl3 | -       | EtOHcl2 | Galcl1 | YPDnc1 | -      | -      | -      | EtOHnc1 | -       | Galnc1 | Galnc2 |
| 7 |        | YPR011C   | YPDcl2 | -      | -       | -       | Galcl1 | -      | YPDnc2 | -      | YPDnc4 | -       | EtOHnc2 | Galnc1 | Galnc2 |
| 7 | SPS100 | YHR139C   | -      | -      | EtOHcl1 | -       | Galcl1 | YPDnc1 | YPDnc2 | -      | -      | EtOHnc1 | -       | Galnc1 | Galnc2 |
| 7 | AIM7   | YDR063W   | YPDcl2 | -      | EtOHcl1 | -       | -      | YPDnc1 | YPDnc2 | YPDnc3 | -      | EtOHnc1 | -       | Galnc1 | -      |
| 7 |        | YLR419W   | YPDcl2 | -      | -       | EtOHcl2 | Galcl1 | YPDnc1 | -      | -      | -      | EtOHnc1 | EtOHnc2 | Galnc1 | -      |
| 7 |        | YNR071C   | -      | -      | EtOHcl1 | -       | Galcl1 | YPDnc1 | -      | YPDnc3 | -      | EtOHnc1 | -       | Galnc1 | Galnc2 |
| 7 | HSP12  | YFL014W   | -      | YPDcl3 | -       | EtOHcl2 | Galcl1 | YPDnc1 | -      | -      | -      | EtOHnc1 | -       | Galnc1 | Galnc2 |
| 7 | FSH1   | YHR049W   | YPDcl2 | -      | EtOHcl1 | EtOHcl2 | Galcl1 | YPDnc1 | -      | YPDnc3 | YPDnc4 | -       | -       | -      | -      |
| 7 | ABZ2   | YMR289W   | -      | YPDcl3 | -       | -       | -      | YPDnc1 | -      | -      | YPDnc4 | EtOHnc1 | EtOHnc2 | Galnc1 | Galnc2 |
| 7 | SLM5   | YCR024C   | YPDcl2 | -      | EtOHcl1 | EtOHcl2 | Galcl1 | -      | YPDnc2 | -      | YPDnc4 | -       | EtOHnc2 | -      | -      |
| 7 |        | YMR254C   | YPDcl2 | -      | EtOHcl1 | -       | Galcl1 | -      | -      | -      | YPDnc4 | EtOHnc1 | -       | Galnc1 | Galnc2 |
| 7 | NAT4   | YMR069W   | -      | -      | EtOHcl1 | EtOHcl2 | -      | YPDnc1 | -      | YPDnc3 | -      | EtOHnc1 | EtOHnc2 | -      | Galnc2 |
| 7 |        | YLR030W   | YPDcl2 | YPDcl3 | -       | EtOHcl2 | Galcl1 | -      | YPDnc2 | -      | YPDnc4 | -       | EtOHnc2 | -      | -      |
| 7 | TFC1   | YBR123C   | -      | -      | -       | -       | Galcl1 | YPDnc1 | YPDnc2 | YPDnc3 | YPDnc4 | -       | -       | Galnc1 | Galnc2 |
| 7 |        | YOR331C   | -      | YPDcl3 | -       | EtOHcl2 | Galcl1 | YPDnc1 | -      | -      | -      | EtOHnc1 | -       | Galnc1 | Galnc2 |
| 6 |        | YBL095W   | YPDcl2 | -      | EtOHcl1 | -       | Galcl1 | -      | -      | YPDnc3 | -      | EtOHnc1 | EtOHnc2 | -      | -      |
| 6 | NUP84  | YDL116W   | -      | -      | EtOHcl1 | -       | -      | -      | -      | -      | YPDnc4 | EtOHnc1 | EtOHnc2 | Galnc1 | Galnc2 |
| 6 |        | YGR266W   | YPDcl2 | YPDcl3 | -       | EtOHcl2 | Galcl1 | -      | -      | -      | -      | EtOHnc1 | -       | -      | Galnc2 |
| 6 | MCD1   | YDL003W   | -      | -      | -       | EtOHcl2 | -      | -      | -      | YPDnc3 | YPDnc4 | -       | EtOHnc2 | Galnc1 | Galnc2 |
| 6 | MUQ1   | YGR007W   | YPDcl2 | -      | EtOHcl1 | -       | Galcl1 | YPDnc1 | -      | YPDnc3 | YPDnc4 | -       | -       | -      | -      |



|   |         |           |        |        |         |         |        |        |        |        |        |         |         |        |        |
|---|---------|-----------|--------|--------|---------|---------|--------|--------|--------|--------|--------|---------|---------|--------|--------|
| 6 | KNS1    | YLL019C   | -      | -      | EtOHcl1 | -       | -      | YPDnc1 | -      | YPDnc3 | -      | EtOHnc1 | -       | Galnc1 | Galnc2 |
| 6 | DPB11   | YJL090C   | YPDcl2 | -      | EtOHcl1 | -       | Galcl1 | -      | -      | -      | YPDnc4 | EtOHnc1 | -       | Galnc1 | -      |
| 6 | YAP1802 | YGR241C   | -      | YPDcl3 | EtOHcl1 | -       | Galcl1 | YPDnc1 | -      | YPDnc3 | -      | -       | -       | Galnc1 | -      |
| 6 | AXL2    | YIL140W   | YPDcl2 | YPDcl3 | EtOHcl1 | EtOHcl2 | Galcl1 | -      | -      | -      | -      | -       | -       | Galnc1 | -      |
| 6 | XBP1    | YIL101C   | -      | -      | EtOHcl1 | EtOHcl2 | -      | -      | -      | YPDnc3 | -      | EtOHnc1 | EtOHnc2 | Galnc1 | -      |
| 6 | MPT5    | YGL178W   | YPDcl2 | YPDcl3 | -       | -       | Galcl1 | -      | -      | YPDnc3 | -      | -       | EtOHnc2 | Galnc1 | -      |
| 6 | MSH6    | YDR097C   | YPDcl2 | -      | EtOHcl1 | EtOHcl2 | Galcl1 | -      | -      | -      | -      | -       | -       | Galnc1 | Galnc2 |
| 6 | ICP55   | YER078C   | -      | YPDcl3 | EtOHcl1 | EtOHcl2 | -      | -      | -      | -      | YPDnc4 | EtOHnc1 | -       | -      | Galnc2 |
| 6 | KRE6    | YPR159W   | YPDcl2 | YPDcl3 | EtOHcl1 | -       | -      | -      | -      | YPDnc3 | -      | -       | -       | Galnc1 | Galnc2 |
| 6 | SAS10   | YDL153C   | -      | -      | -       | EtOHcl2 | Galcl1 | -      | YPDnc2 | YPDnc3 | YPDnc4 | -       | EtOHnc2 | -      | -      |
| 6 |         | YGL052W   | YPDcl2 | -      | -       | EtOHcl2 | -      | -      | YPDnc2 | YPDnc3 | -      | -       | -       | Galnc1 | Galnc2 |
| 6 |         | YDR249C   | YPDcl2 | YPDcl3 | -       | EtOHcl2 | Galcl1 | -      | -      | -      | YPDnc4 | -       | EtOHnc2 | -      | -      |
| 6 |         | YBL053W   | YPDcl2 | YPDcl3 | -       | EtOHcl2 | Galcl1 | -      | -      | -      | -      | EtOHnc1 | -       | -      | Galnc2 |
| 6 | SUC2    | YIL162W   | -      | -      | -       | EtOHcl2 | Galcl1 | -      | YPDnc2 | -      | -      | EtOHnc1 | EtOHnc2 | Galnc1 | -      |
| 6 | RCK2    | YLR248W   | -      | -      | EtOHcl1 | -       | -      | YPDnc1 | -      | -      | -      | EtOHnc1 | EtOHnc2 | Galnc1 | Galnc2 |
| 6 | RAX1    | YOR301W   | -      | -      | EtOHcl1 | -       | Galcl1 | -      | YPDnc2 | YPDnc3 | YPDnc4 | -       | -       | -      | Galnc2 |
| 6 |         | YPL044C   | YPDcl2 | -      | -       | -       | Galcl1 | -      | -      | -      | -      | EtOHnc1 | EtOHnc2 | Galnc1 | Galnc2 |
| 6 | DFG16   | YOR030W   | -      | -      | -       | -       | -      | YPDnc1 | YPDnc2 | YPDnc3 | -      | EtOHnc1 | -       | Galnc1 | Galnc2 |
| 6 |         | YCR049C   | -      | YPDcl3 | -       | -       | -      | YPDnc1 | -      | -      | -      | EtOHnc1 | EtOHnc2 | Galnc1 | Galnc2 |
| 6 |         | YCL041C   | -      | YPDcl3 | EtOHcl1 | -       | -      | YPDnc1 | -      | -      | -      | EtOHnc1 | -       | Galnc1 | Galnc2 |
| 6 | PNT1    | YOR266W   | -      | -      | -       | -       | Galcl1 | YPDnc1 | -      | -      | YPDnc4 | EtOHnc1 | -       | Galnc1 | Galnc2 |
| 6 |         | YDR048C   | -      | -      | -       | EtOHcl2 | Galcl1 | -      | YPDnc2 | -      | -      | EtOHnc1 | EtOHnc2 | -      | Galnc2 |
| 6 | NAN1    | YPL126W   | -      | YPDcl3 | -       | EtOHcl2 | Galcl1 | -      | -      | -      | -      | EtOHnc1 | EtOHnc2 | Galnc1 | -      |
| 6 | YHK8    | YHR048W   | -      | -      | EtOHcl1 | EtOHcl2 | Galcl1 | YPDnc1 | -      | -      | YPDnc4 | EtOHnc1 | -       | -      | -      |
| 6 | LSB1    | YGR136W   | -      | -      | -       | -       | -      | -      | YPDnc2 | YPDnc3 | YPDnc4 | -       | EtOHnc2 | Galnc1 | Galnc2 |
| 6 | MFA2    | YNL145W   | -      | -      | -       | -       | -      | YPDnc1 | YPDnc2 | YPDnc3 | -      | -       | EtOHnc2 | Galnc1 | Galnc2 |
| 6 |         | YMR194C-f | -      | YPDcl3 | EtOHcl1 | -       | Galcl1 | YPDnc1 | -      | -      | -      | EtOHnc1 | -       | -      | Galnc2 |
| 6 | SLM4    | YBR077C   | -      | -      | -       | -       | -      | YPDnc1 | -      | YPDnc3 | -      | EtOHnc1 | EtOHnc2 | Galnc1 | Galnc2 |
| 6 | PHM7    | YOL084W   | YPDcl2 | YPDcl3 | -       | -       | Galcl1 | -      | YPDnc2 | -      | YPDnc4 | -       | -       | Galnc1 | -      |
| 6 |         | YPL191C   | -      | YPDcl3 | EtOHcl1 | EtOHcl2 | -      | -      | -      | -      | -      | EtOHnc1 | EtOHnc2 | Galnc1 | -      |
| 6 | ALK2    | YBL009W   | YPDcl2 | YPDcl3 | -       | EtOHcl2 | Galcl1 | -      | YPDnc2 | -      | YPDnc4 | -       | -       | -      | -      |
| 6 | TRS23   | YDR246W   | -      | YPDcl3 | EtOHcl1 | -       | -      | YPDnc1 | -      | -      | -      | EtOHnc1 | -       | Galnc1 | Galnc2 |
| 6 | AIM10   | YER087W   | YPDcl2 | -      | -       | EtOHcl2 | -      | -      | -      | YPDnc3 | -      | EtOHnc1 | EtOHnc2 | Galnc1 | -      |
| 6 |         | YAL059C-A | -      | YPDcl3 | EtOHcl1 | -       | -      | -      | YPDnc2 | YPDnc3 | YPDnc4 | -       | -       | -      | Galnc2 |

|   |         |           |        |         |         |         |        |        |        |        |         |         |         |               |
|---|---------|-----------|--------|---------|---------|---------|--------|--------|--------|--------|---------|---------|---------|---------------|
| 6 | YJL027C | -         | -      | EtOHcl1 | -       | Galcl1  | YPDnc1 | -      | YPDnc3 | -      | -       | -       | Galnc1  | Galnc2        |
| 6 | LTV1    | YKL143W   | YPDcl2 | -       | EtOHcl1 | -       | Galcl1 | YPDnc1 | -      | -      | -       | -       | Galnc1  | Galnc2        |
| 6 | RSB1    | YOR049C   | -      | YPDcl3  | EtOHcl1 | -       | -      | -      | -      | -      | EtOHnc1 | EtOHnc2 | Galnc1  | Galnc2        |
| 6 | SPS1    | YDR523C   | -      | -       | EtOHcl1 | -       | -      | YPDnc2 | YPDnc3 | -      | EtOHnc1 | EtOHnc2 | Galnc1  | -             |
| 6 | SEC17   | YBL050W   | -      | YPDcl3  | EtOHcl1 | -       | Galcl1 | -      | -      | YPDnc4 | EtOHnc1 | -       | Galnc1  | -             |
| 6 | AHA1    | YDR214W   | -      | -       | EtOHcl1 | -       | -      | YPDnc1 | YPDnc2 | YPDnc3 | -       | -       | EtOHnc2 | Galnc2        |
| 6 | SAY1    | YGR263C   | -      | -       | EtOHcl1 | EtOHcl2 | Galcl1 | -      | -      | -      | EtOHnc1 | EtOHnc2 | Galnc1  | -             |
| 6 |         | YNL146W   | -      | -       | -       | -       | -      | YPDnc1 | YPDnc2 | YPDnc3 | -       | -       | EtOHnc2 | Galnc1 Galnc2 |
| 6 | HTB1    | YDR224C   | -      | -       | EtOHcl1 | -       | -      | YPDnc1 | -      | -      | YPDnc4  | EtOHnc1 | -       | Galnc1 Galnc2 |
| 6 |         | YPR108W   | -      | -       | EtOHcl1 | -       | Galcl1 | YPDnc1 | -      | YPDnc3 | -       | EtOHnc1 | -       | Galnc1        |
| 6 | SHR5    | YOL110W   | -      | -       | EtOHcl1 | -       | Galcl1 | -      | YPDnc2 | -      | YPDnc4  | -       | -       | Galnc1 Galnc2 |
| 6 | UBC9    | YDL064W   | -      | -       | -       | EtOHcl2 | Galcl1 | YPDnc1 | -      | -      | -       | EtOHnc1 | EtOHnc2 | Galnc2        |
| 6 | CSH1    | YBR161W   | -      | -       | EtOHcl1 | -       | -      | YPDnc1 | -      | -      | -       | EtOHnc1 | EtOHnc2 | Galnc1 Galnc2 |
| 6 |         | YLR162W   | YPDcl2 | YPDcl3  | EtOHcl1 | EtOHcl2 | Galcl1 | -      | -      | -      | -       | -       | Galnc1  | -             |
| 6 | NSA1    | YGL111W   | YPDcl2 | -       | -       | EtOHcl2 | -      | YPDnc1 | -      | -      | -       | EtOHnc1 | -       | Galnc1 Galnc2 |
| 6 | RPS10B  | YMR230W   | YPDcl2 | -       | EtOHcl1 | -       | Galcl1 | -      | YPDnc2 | YPDnc3 | -       | -       | -       | Galnc2        |
| 6 | RGI1    | YER067W   | YPDcl2 | -       | -       | -       | -      | -      | YPDnc2 | YPDnc3 | YPDnc4  | EtOHnc1 | -       | Galnc1        |
| 6 | FAA1    | YOR317W   | -      | YPDcl3  | EtOHcl1 | EtOHcl2 | Galcl1 | -      | -      | YPDnc3 | YPDnc4  | -       | -       | -             |
| 6 | UFD4    | YKL010C   | -      | -       | -       | -       | Galcl1 | -      | YPDnc2 | -      | YPDnc4  | EtOHnc1 | -       | Galnc1 Galnc2 |
| 6 | DCG1    | YIR030C   | YPDcl2 | YPDcl3  | -       | EtOHcl2 | -      | -      | YPDnc2 | YPDnc3 | YPDnc4  | -       | -       | -             |
| 6 | CSL4    | YNL232W   | -      | -       | EtOHcl1 | EtOHcl2 | -      | YPDnc1 | YPDnc2 | YPDnc3 | -       | -       | -       | Galnc2        |
| 6 |         | YLR414C   | -      | YPDcl3  | EtOHcl1 | -       | -      | -      | -      | -      | -       | EtOHnc1 | EtOHnc2 | Galnc1 Galnc2 |
| 6 |         | YLR149C-A | -      | -       | -       | -       | Galcl1 | YPDnc1 | -      | YPDnc3 | -       | EtOHnc1 | -       | Galnc1 Galnc2 |
| 6 | MKK1    | YOR231W   | -      | -       | -       | -       | Galcl1 | -      | YPDnc2 | -      | YPDnc4  | EtOHnc1 | EtOHnc2 | Galnc1        |
| 6 | ADE3    | YGR204W   | YPDcl2 | -       | EtOHcl1 | EtOHcl2 | Galcl1 | YPDnc1 | -      | -      | -       | -       | -       | Galnc1        |
| 6 | CCT8    | YJL008C   | YPDcl2 | -       | EtOHcl1 | -       | Galcl1 | YPDnc1 | YPDnc2 | -      | YPDnc4  | -       | -       | -             |
| 6 | BSC2    | YDR275W   | YPDcl2 | YPDcl3  | -       | -       | -      | YPDnc1 | -      | -      | YPDnc4  | -       | -       | Galnc1 Galnc2 |
| 6 | VPS3    | YDR495C   | YPDcl2 | YPDcl3  | EtOHcl1 | EtOHcl2 | Galcl1 | -      | -      | -      | -       | EtOHnc1 | -       | -             |
| 6 | PTP1    | YDL230W   | -      | -       | -       | -       | Galcl1 | -      | YPDnc2 | YPDnc3 | YPDnc4  | -       | EtOHnc2 | Galnc2        |
| 6 |         | YOR050C   | -      | YPDcl3  | -       | -       | -      | -      | -      | YPDnc3 | -       | EtOHnc1 | EtOHnc2 | Galnc1 Galnc2 |
| 6 | YPT6    | YLR262C   | -      | -       | -       | EtOHcl2 | Galcl1 | YPDnc1 | -      | YPDnc3 | -       | EtOHnc1 | -       | Galnc2        |
| 6 |         | YLR235C   | -      | -       | EtOHcl1 | -       | -      | YPDnc1 | -      | -      | YPDnc4  | -       | EtOHnc2 | Galnc1 Galnc2 |
| 6 | RRP5    | YMR229C   | YPDcl2 | -       | EtOHcl1 | EtOHcl2 | Galcl1 | -      | -      | -      | -       | -       | EtOHnc2 | Galnc2        |
| 6 |         | YGR050C   | -      | YPDcl3  | EtOHcl1 | -       | Galcl1 | -      | -      | YPDnc3 | -       | -       | EtOHnc2 | Galnc2        |

|         |           |        |        |         |         |        |        |        |        |        |         |         |        |        |
|---------|-----------|--------|--------|---------|---------|--------|--------|--------|--------|--------|---------|---------|--------|--------|
| 6 ISU1  | YPL135W   | -      | -      | -       | -       | -      | YPDnc1 | YPDnc2 | YPDnc3 | YPDnc4 | -       | EtOHnc2 | Galnc1 | -      |
| 6 SCM4  | YGR049W   | -      | -      | EtOHcl1 | -       | Galcl1 | -      | -      | YPDnc3 | -      | -       | EtOHnc2 | Galnc1 | Galnc2 |
| 6 NAB6  | YML117W   | YPDcl2 | YPDcl3 | EtOHcl1 | EtOHcl2 | Galcl1 | YPDnc1 | -      | -      | -      | -       | -       | -      | -      |
| 6       | YHR137C-A | -      | -      | -       | -       | Galcl1 | YPDnc1 | YPDnc2 | YPDnc3 | -      | EtOHnc1 | -       | -      | Galnc2 |
| 6       | YOR314W   | -      | -      | EtOHcl1 | -       | -      | -      | -      | YPDnc3 | YPDnc4 | EtOHnc1 | EtOHnc2 | Galnc1 | -      |
| 6 STP2  | YHR006W   | -      | -      | EtOHcl1 | EtOHcl2 | -      | YPDnc1 | -      | YPDnc3 | -      | -       | -       | Galnc1 | Galnc2 |
| 6 BRR2  | YER172C   | YPDcl2 | -      | EtOHcl1 | EtOHcl2 | Galcl1 | -      | YPDnc2 | -      | YPDnc4 | -       | -       | -      | -      |
| 6 ADE17 | YMR120C   | -      | -      | EtOHcl1 | -       | -      | YPDnc1 | -      | -      | -      | EtOHnc1 | EtOHnc2 | Galnc1 | Galnc2 |
| 6 BUD30 | YDL151C   | YPDcl2 | YPDcl3 | EtOHcl1 | -       | Galcl1 | YPDnc1 | -      | -      | -      | EtOHnc1 | -       | -      | -      |
| 6 URA7  | YBL039C   | YPDcl2 | -      | EtOHcl1 | EtOHcl2 | -      | -      | -      | YPDnc3 | YPDnc4 | -       | EtOHnc2 | -      | -      |
| 6 BDF1  | YLR399C   | -      | YPDcl3 | EtOHcl1 | -       | -      | -      | YPDnc2 | YPDnc3 | -      | -       | EtOHnc2 | -      | Galnc2 |
| 6 RPL28 | YGL103W   | YPDcl2 | -      | EtOHcl1 | -       | Galcl1 | -      | YPDnc2 | YPDnc3 | -      | -       | -       | Galnc1 | -      |
| 6 CBC2  | YPL178W   | -      | -      | EtOHcl1 | -       | -      | YPDnc1 | -      | YPDnc3 | -      | EtOHnc1 | -       | Galnc1 | Galnc2 |
| 6 CAR2  | YLR438W   | -      | -      | -       | -       | Galcl1 | YPDnc1 | -      | -      | -      | EtOHnc1 | EtOHnc2 | Galnc1 | Galnc2 |
| 6       | YBR090C   | -      | -      | EtOHcl1 | -       | -      | YPDnc1 | YPDnc2 | -      | -      | EtOHnc1 | EtOHnc2 | Galnc1 | -      |
| 6 RPF1  | YHR088W   | -      | -      | -       | -       | -      | YPDnc1 | YPDnc2 | YPDnc3 | -      | EtOHnc1 | EtOHnc2 | -      | Galnc2 |
| 6 HXT6  | YDR343C   | -      | -      | EtOHcl1 | -       | -      | YPDnc1 | YPDnc2 | YPDnc3 | -      | -       | -       | Galnc1 | Galnc2 |
| 6       | YNL097C-B | -      | -      | EtOHcl1 | -       | -      | YPDnc1 | YPDnc2 | -      | YPDnc4 | -       | EtOHnc2 | -      | Galnc2 |
| 6 PRM9  | YAR031W   | -      | -      | EtOHcl1 | EtOHcl2 | -      | -      | YPDnc2 | YPDnc3 | -      | -       | EtOHnc2 | -      | Galnc2 |
| 6       | YAL004W   | -      | -      | -       | EtOHcl2 | Galcl1 | -      | YPDnc2 | YPDnc3 | -      | EtOHnc1 | -       | -      | Galnc2 |
| 6       | YHL015W-7 | -      | -      | -       | -       | -      | YPDnc1 | -      | YPDnc3 | -      | EtOHnc1 | EtOHnc2 | Galnc1 | Galnc2 |
| 6 POL30 | YBR088C   | -      | -      | -       | EtOHcl2 | Galcl1 | YPDnc1 | YPDnc2 | -      | -      | EtOHnc1 | -       | Galnc1 | -      |
| 6 CFT1  | YDR301W   | -      | -      | -       | -       | Galcl1 | YPDnc1 | YPDnc2 | YPDnc3 | YPDnc4 | -       | -       | -      | Galnc2 |
| 6 SDH4  | YDR178W   | YPDcl2 | YPDcl3 | EtOHcl1 | -       | Galcl1 | -      | -      | YPDnc3 | YPDnc4 | -       | -       | -      | -      |
| 6 MOT2  | YER068W   | YPDcl2 | -      | -       | -       | Galcl1 | -      | YPDnc2 | YPDnc3 | YPDnc4 | -       | EtOHnc2 | -      | -      |
| 6       | YOR121C   | -      | -      | EtOHcl1 | -       | Galcl1 | YPDnc1 | -      | -      | -      | EtOHnc1 | -       | Galnc1 | Galnc2 |
| 6 HER2  | YMR293C   | -      | -      | -       | -       | Galcl1 | YPDnc1 | -      | YPDnc3 | -      | EtOHnc1 | -       | Galnc1 | Galnc2 |
| 6 RPS9B | YBR189W   | YPDcl2 | YPDcl3 | EtOHcl1 | -       | Galcl1 | -      | -      | -      | YPDnc4 | -       | EtOHnc2 | -      | -      |
| 6 GTO3  | YMR251W   | -      | YPDcl3 | EtOHcl1 | -       | -      | -      | -      | -      | -      | EtOHnc1 | EtOHnc2 | Galnc1 | Galnc2 |
| 6 SPR28 | YDR218C   | -      | YPDcl3 | -       | EtOHcl2 | Galcl1 | -      | -      | -      | YPDnc4 | EtOHnc1 | -       | Galnc1 | -      |
| 6 RPB4  | YJL140W   | YPDcl2 | YPDcl3 | -       | -       | Galcl1 | YPDnc1 | -      | -      | -      | -       | -       | Galnc1 | Galnc2 |
| 6 FZF1  | YGL254W   | -      | -      | EtOHcl1 | -       | -      | YPDnc1 | -      | -      | -      | EtOHnc1 | EtOHnc2 | Galnc1 | Galnc2 |
| 6       | YGR073C   | -      | -      | -       | -       | -      | YPDnc1 | YPDnc2 | YPDnc3 | -      | EtOHnc1 | EtOHnc2 | -      | Galnc2 |
| 6       | YDR131C   | YPDcl2 | -      | EtOHcl1 | -       | Galcl1 | -      | -      | -      | YPDnc4 | -       | EtOHnc2 | -      | Galnc2 |

|   |        |           |        |        |         |         |        |        |        |        |        |         |         |        |        |
|---|--------|-----------|--------|--------|---------|---------|--------|--------|--------|--------|--------|---------|---------|--------|--------|
| 5 | MRPL24 | YMR193W   | YPDcl2 | -      | EtOHcl1 | EtOHcl2 | Galcl1 | -      | -      | -      | YPDnc4 | -       | -       | -      | -      |
| 5 | GCN4   | YEL009C   | -      | -      | EtOHcl1 | -       | -      | YPDnc1 | -      | YPDnc3 | -      | -       | EtOHnc2 | -      | Galnc2 |
| 5 | PET130 | YJL023C   | -      | -      | -       | EtOHcl2 | Galcl1 | -      | YPDnc2 | YPDnc3 | YPDnc4 | -       | -       | -      | -      |
| 5 |        | YGR035C   | YPDcl2 | -      | EtOHcl1 | -       | -      | -      | -      | YPDnc3 | -      | EtOHnc1 | -       | -      | Galnc2 |
| 5 | NEO1   | YIL048W   | -      | -      | -       | EtOHcl2 | -      | -      | YPDnc2 | YPDnc3 | -      | EtOHnc1 | -       | Galnc1 | -      |
| 5 | MEP1   | YGR121C   | -      | -      | -       | EtOHcl2 | Galcl1 | -      | -      | -      | -      | EtOHnc1 | EtOHnc2 | -      | Galnc2 |
| 5 | RGT1   | YKL038W   | YPDcl2 | YPDcl3 | EtOHcl1 | -       | -      | YPDnc1 | -      | -      | -      | -       | -       | Galnc1 | -      |
| 5 | RPL26B | YGR034W   | YPDcl2 | -      | -       | -       | -      | YPDnc1 | -      | -      | -      | EtOHnc1 | -       | Galnc1 | Galnc2 |
| 5 | SOL1   | YNR034W   | -      | YPDcl3 | -       | -       | Galcl1 | -      | YPDnc2 | -      | -      | EtOHnc1 | -       | Galnc1 | -      |
| 5 |        | YJL028W   | -      | -      | EtOHcl1 | -       | Galcl1 | YPDnc1 | -      | YPDnc3 | -      | -       | -       | Galnc1 | -      |
| 5 | SPL2   | YHR136C   | -      | -      | -       | -       | -      | -      | YPDnc2 | -      | -      | EtOHnc1 | EtOHnc2 | Galnc1 | Galnc2 |
| 5 |        | YLR456W   | YPDcl2 | -      | -       | EtOHcl2 | Galcl1 | -      | -      | -      | -      | EtOHnc1 | -       | Galnc1 | -      |
| 5 | HMRA1  | YCR097W   | YPDcl2 | -      | EtOHcl1 | EtOHcl2 | Galcl1 | -      | -      | -      | -      | -       | EtOHnc2 | -      | -      |
| 5 | PMA2   | YPL036W   | -      | YPDcl3 | EtOHcl1 | EtOHcl2 | Galcl1 | -      | -      | -      | YPDnc4 | -       | -       | -      | -      |
| 5 | GFD1   | YMR255W   | YPDcl2 | -      | EtOHcl1 | -       | Galcl1 | -      | -      | -      | -      | EtOHnc1 | -       | -      | Galnc2 |
| 5 | ECM38  | YLR299W   | -      | YPDcl3 | EtOHcl1 | -       | Galcl1 | YPDnc1 | -      | -      | -      | -       | -       | Galnc1 | -      |
| 5 | YPS5   | YGL259W   | YPDcl2 | YPDcl3 | EtOHcl1 | -       | Galcl1 | -      | -      | -      | -      | EtOHnc1 | -       | -      | -      |
| 5 | NAB3   | YPL190C   | -      | -      | -       | -       | -      | YPDnc1 | -      | YPDnc3 | -      | EtOHnc1 | -       | Galnc1 | Galnc2 |
| 5 | IRC14  | YOR135C   | -      | -      | -       | -       | -      | YPDnc1 | -      | -      | YPDnc4 | EtOHnc1 | -       | Galnc1 | Galnc2 |
| 5 | ERG20  | YJL167W   | YPDcl2 | YPDcl3 | EtOHcl1 | -       | -      | -      | -      | -      | -      | EtOHnc1 | -       | Galnc1 | -      |
| 5 | TSL1   | YML100W   | -      | -      | -       | -       | -      | YPDnc1 | YPDnc2 | YPDnc3 | -      | EtOHnc1 | -       | -      | Galnc2 |
| 5 |        | YDR182W   | -      | YPDcl3 | -       | -       | Galcl1 | -      | -      | -      | -      | EtOHnc1 | -       | Galnc1 | Galnc2 |
| 5 | CCZ1   | YBR131W   | -      | -      | -       | -       | -      | YPDnc1 | YPDnc2 | -      | -      | -       | EtOHnc2 | Galnc1 | Galnc2 |
| 5 | MUC1   | YIR019C   | -      | -      | EtOHcl1 | -       | -      | YPDnc1 | -      | -      | -      | EtOHnc1 | -       | Galnc1 | Galnc2 |
| 5 |        | YOR338W   | -      | -      | EtOHcl1 | -       | Galcl1 | -      | -      | YPDnc3 | YPDnc4 | -       | -       | -      | Galnc2 |
| 5 |        | YFL015W-A | YPDcl2 | YPDcl3 | EtOHcl1 | -       | Galcl1 | YPDnc1 | -      | -      | -      | -       | -       | -      | -      |
| 5 | RAS1   | YOR101W   | -      | -      | EtOHcl1 | -       | -      | -      | YPDnc2 | YPDnc3 | YPDnc4 | -       | EtOHnc2 | -      | -      |
| 5 | AIM26  | YKL037W   | YPDcl2 | YPDcl3 | -       | EtOHcl2 | Galcl1 | -      | -      | -      | YPDnc4 | -       | -       | -      | -      |
| 5 |        | YNL146C-A | -      | -      | -       | -       | Galcl1 | YPDnc1 | -      | YPDnc3 | -      | -       | -       | Galnc1 | Galnc2 |
| 5 | KRE29  | YER038C   | -      | -      | -       | -       | Galcl1 | -      | YPDnc2 | -      | -      | EtOHnc1 | -       | Galnc1 | Galnc2 |
| 5 |        | YKL096C-B | -      | -      | EtOHcl1 | -       | -      | YPDnc1 | -      | -      | -      | EtOHnc1 | EtOHnc2 | -      | Galnc2 |
| 5 | PHR1   | YOR386W   | -      | -      | -       | -       | -      | YPDnc1 | -      | YPDnc3 | YPDnc4 | EtOHnc1 | EtOHnc2 | -      | -      |
| 5 |        | YBR013C   | YPDcl2 | -      | -       | -       | Galcl1 | -      | -      | YPDnc3 | -      | EtOHnc1 | -       | -      | Galnc2 |
| 5 | RIM15  | YFL033C   | -      | -      | EtOHcl1 | -       | -      | -      | -      | -      | -      | EtOHnc1 | EtOHnc2 | Galnc1 | Galnc2 |

|   |        |           |        |        |         |         |        |        |        |        |        |         |         |        |        |
|---|--------|-----------|--------|--------|---------|---------|--------|--------|--------|--------|--------|---------|---------|--------|--------|
| 5 | RKM4   | YDR257C   | -      | -      | -       | -       | Galcl1 | YPDnc1 | -      | -      | -      | EtOHnc1 | EtOHnc2 | -      | Galnc2 |
| 5 | SLO1   | YER180C-A | YPDcl2 | YPDcl3 | -       | -       | Galcl1 | -      | -      | -      | -      | -       | -       | Galnc1 | Galnc2 |
| 5 | RNH202 | YDR279W   | -      | YPDcl3 | -       | -       | Galcl1 | YPDnc1 | -      | -      | -      | EtOHnc1 | -       | Galnc1 | -      |
| 5 |        | YDL016C   | -      | -      | -       | -       | -      | -      | YPDnc2 | YPDnc3 | -      | EtOHnc1 | -       | Galnc1 | Galnc2 |
| 5 | PRE9   | YGR135W   | -      | -      | EtOHcl1 | EtOHcl2 | -      | YPDnc1 | -      | -      | -      | -       | EtOHnc2 | -      | Galnc2 |
| 5 |        | YLR287C   | -      | -      | -       | -       | Galcl1 | -      | -      | YPDnc3 | -      | EtOHnc1 | -       | Galnc1 | Galnc2 |
| 5 | GRX6   | YDL010W   | -      | -      | -       | -       | -      | YPDnc1 | -      | -      | YPDnc4 | EtOHnc1 | EtOHnc2 | Galnc1 | -      |
| 5 | KAP95  | YLR347C   | -      | -      | EtOHcl1 | -       | Galcl1 | -      | -      | -      | -      | -       | EtOHnc2 | Galnc1 | Galnc2 |
| 5 | GIR2   | YDR152W   | -      | -      | EtOHcl1 | -       | -      | YPDnc1 | -      | -      | -      | EtOHnc1 | -       | Galnc1 | Galnc2 |
| 5 |        | YDL073W   | YPDcl2 | -      | -       | -       | Galcl1 | YPDnc1 | -      | -      | -      | EtOHnc1 | -       | Galnc1 | -      |
| 5 |        | YJR085C   | -      | YPDcl3 | -       | EtOHcl2 | Galcl1 | -      | -      | -      | -      | EtOHnc1 | -       | Galnc1 | -      |
| 5 | RPL33B | YOR234C   | -      | YPDcl3 | EtOHcl1 | -       | Galcl1 | YPDnc1 | -      | -      | -      | -       | -       | Galnc1 | -      |
| 5 |        | YLR296W   | -      | -      | -       | -       | Galcl1 | YPDnc1 | -      | -      | -      | -       | EtOHnc2 | Galnc1 | Galnc2 |
| 5 |        | YPR136C   | -      | -      | -       | -       | -      | -      | YPDnc2 | -      | -      | EtOHnc1 | EtOHnc2 | Galnc1 | Galnc2 |
| 5 |        | YER079C-A | -      | -      | EtOHcl1 | -       | Galcl1 | -      | -      | -      | -      | EtOHnc1 | -       | Galnc1 | Galnc2 |
| 5 |        | YML133W   | -      | -      | -       | -       | Galcl1 | YPDnc1 | YPDnc2 | YPDnc3 | -      | EtOHnc1 | -       | -      | -      |
| 5 | UPC2   | YDR213W   | -      | -      | EtOHcl1 | -       | -      | YPDnc1 | -      | -      | -      | EtOHnc1 | -       | Galnc1 | Galnc2 |
| 5 | LAT1   | YNL071W   | YPDcl2 | -      | -       | -       | Galcl1 | -      | -      | -      | -      | -       | EtOHnc2 | Galnc1 | Galnc2 |
| 5 |        | YPR196W   | YPDcl2 | -      | EtOHcl1 | EtOHcl2 | Galcl1 | -      | -      | -      | YPDnc4 | -       | -       | -      | -      |
| 5 | CDC7   | YDL017W   | -      | -      | -       | -       | -      | -      | YPDnc2 | YPDnc3 | -      | EtOHnc1 | -       | Galnc1 | Galnc2 |
| 5 | SYF1   | YDR416W   | -      | -      | EtOHcl1 | -       | Galcl1 | -      | YPDnc2 | YPDnc3 | -      | -       | -       | -      | Galnc2 |
| 5 | RPL10  | YLR075W   | -      | -      | -       | EtOHcl2 | -      | -      | -      | -      | -      | EtOHnc1 | EtOHnc2 | Galnc1 | Galnc2 |
| 5 | VPS36  | YLR417W   | -      | -      | -       | -       | Galcl1 | YPDnc1 | -      | -      | -      | EtOHnc1 | EtOHnc2 | Galnc1 | -      |
| 5 |        | YHR140W   | YPDcl2 | -      | EtOHcl1 | EtOHcl2 | -      | -      | -      | -      | YPDnc4 | -       | -       | -      | Galnc2 |
| 5 | CMC1   | YKL137W   | YPDcl2 | -      | EtOHcl1 | -       | Galcl1 | -      | -      | YPDnc3 | -      | -       | -       | -      | Galnc2 |
| 5 | SKS1   | YPL026C   | -      | -      | EtOHcl1 | -       | -      | YPDnc1 | -      | -      | YPDnc4 | -       | -       | Galnc1 | Galnc2 |
| 5 | TEL1   | YBL088C   | YPDcl2 | YPDcl3 | EtOHcl1 | -       | Galcl1 | -      | -      | -      | -      | -       | -       | -      | Galnc2 |
| 5 | AAC1   | YMR056C   | -      | -      | EtOHcl1 | -       | -      | YPDnc1 | -      | YPDnc3 | -      | EtOHnc1 | -       | -      | Galnc2 |
| 5 | YAT1   | YAR035W   | -      | -      | -       | -       | Galcl1 | YPDnc1 | -      | -      | -      | EtOHnc1 | EtOHnc2 | Galnc1 | -      |
| 5 | MMF1   | YIL051C   | -      | -      | EtOHcl1 | -       | Galcl1 | -      | -      | -      | -      | EtOHnc1 | -       | Galnc1 | Galnc2 |
| 5 | RAS2   | YNL098C   | -      | -      | EtOHcl1 | -       | -      | YPDnc1 | YPDnc2 | -      | -      | -       | EtOHnc2 | -      | Galnc2 |
| 5 | YRA1   | YDR381W   | -      | -      | EtOHcl1 | EtOHcl2 | Galcl1 | -      | -      | -      | -      | EtOHnc1 | -       | Galnc1 | -      |
| 5 |        | YNL203C   | YPDcl2 | -      | EtOHcl1 | -       | Galcl1 | YPDnc1 | -      | -      | -      | -       | EtOHnc2 | -      | -      |
| 5 | SUS1   | YBR111W-  | -      | YPDcl3 | -       | -       | -      | -      | -      | -      | -      | EtOHnc1 | EtOHnc2 | Galnc1 | Galnc2 |

|   |         |           |        |         |         |         |        |        |        |        |         |         |         |        |        |
|---|---------|-----------|--------|---------|---------|---------|--------|--------|--------|--------|---------|---------|---------|--------|--------|
| 5 | YLL047W | -         | YPDcl3 | -       | -       | Galcl1  | -      | YPDnc2 | YPDnc3 | -      | -       | -       | Galnc1  | -      |        |
| 5 | YKLO27W | YPDcl2    | -      | EtOHcl1 | -       | -       | -      | YPDnc2 | -      | YPDnc4 | -       | -       | Galnc1  | -      |        |
| 5 | RGM1    | YMR182C   | -      | -       | -       | -       | YPDnc1 | YPDnc2 | YPDnc3 | -      | EtOHnc1 | -       | Galnc1  | -      |        |
| 5 | MLP2    | YIL149C   | -      | YPDcl3  | EtOHcl1 | -       | Galcl1 | -      | -      | -      | -       | EtOHnc2 | -       | Galnc2 |        |
| 5 | CIT1    | YNR001C   | YPDcl2 | YPDcl3  | EtOHcl1 | -       | Galcl1 | -      | -      | -      | YPDnc4  | -       | -       | -      |        |
| 5 | RPS10A  | YOR293W   | -      | -       | -       | -       | -      | YPDnc1 | YPDnc2 | YPDnc3 | -       | -       | EtOHnc2 | Galnc1 | -      |
| 5 | SHU2    | YDR078C   | YPDcl2 | -       | EtOHcl1 | EtOHcl2 | Galcl1 | -      | -      | -      | YPDnc4  | -       | -       | -      |        |
| 5 | BDF2    | YDL070W   | -      | -       | EtOHcl1 | -       | -      | YPDnc2 | YPDnc3 | YPDnc4 | -       | EtOHnc2 | -       | -      |        |
| 5 | ECM11   | YDR446W   | -      | -       | -       | -       | Galcl1 | YPDnc1 | -      | -      | -       | EtOHnc1 | -       | Galnc1 | Galnc2 |
| 5 | ERG11   | YHR007C   | -      | -       | EtOHcl1 | EtOHcl2 | -      | YPDnc1 | -      | -      | -       | -       | -       | Galnc1 | Galnc2 |
| 5 |         | YPL216W   | -      | -       | EtOHcl1 | EtOHcl2 | Galcl1 | -      | -      | -      | YPDnc4  | -       | -       | Galnc1 | -      |
| 5 |         | YDL160C-A | YPDcl2 | -       | EtOHcl1 | -       | Galcl1 | -      | -      | -      | YPDnc4  | -       | -       | Galnc1 | -      |
| 5 | ADP1    | YCR011C   | -      | -       | EtOHcl1 | -       | -      | YPDnc1 | -      | -      | -       | EtOHnc1 | -       | Galnc1 | Galnc2 |
| 5 | AKR2    | YOR034C   | -      | -       | -       | -       | Galcl1 | -      | -      | -      | YPDnc4  | EtOHnc1 | -       | Galnc1 | Galnc2 |
| 5 | URA4    | YLR420W   | YPDcl2 | -       | -       | -       | Galcl1 | -      | -      | -      | YPDnc4  | -       | EtOHnc2 | Galnc1 | -      |
| 5 | GLR1    | YPL091W   | -      | -       | EtOHcl1 | EtOHcl2 | Galcl1 | YPDnc1 | YPDnc2 | -      | -       | -       | -       | -      | -      |
| 5 | FUI1    | YBL042C   | -      | -       | -       | EtOHcl2 | Galcl1 | YPDnc1 | -      | -      | -       | EtOHnc1 | -       | Galnc1 | -      |
| 5 |         | YBR099C   | YPDcl2 | YPDcl3  | EtOHcl1 | -       | Galcl1 | -      | -      | -      | -       | EtOHnc1 | -       | -      | -      |
| 5 | RAD17   | YOR368W   | -      | -       | -       | -       | -      | YPDnc2 | -      | YPDnc4 | EtOHnc1 | EtOHnc2 | Galnc1  | -      |        |
| 5 | COX13   | YGL191W   | YPDcl2 | -       | EtOHcl1 | -       | -      | YPDnc1 | -      | -      | -       | -       | -       | Galnc1 | Galnc2 |
| 5 |         | YDR132C   | YPDcl2 | YPDcl3  | EtOHcl1 | -       | -      | YPDnc1 | -      | -      | YPDnc4  | -       | -       | -      | -      |
| 5 | IVY1    | YDR229W   | -      | -       | -       | -       | -      | YPDnc1 | YPDnc2 | YPDnc3 | YPDnc4  | -       | -       | Galnc1 | -      |
| 5 | SSA1    | YAL005C   | -      | -       | -       | EtOHcl2 | Galcl1 | -      | YPDnc2 | YPDnc3 | -       | -       | -       | -      | Galnc2 |
| 5 | PGI1    | YBR196C   | -      | -       | EtOHcl1 | -       | -      | -      | YPDnc3 | -      | EtOHnc1 | EtOHnc2 | -       | Galnc2 |        |
| 4 | REG2    | YBR050C   | -      | -       | EtOHcl1 | -       | Galcl1 | -      | -      | YPDnc3 | -       | EtOHnc1 | -       | -      | -      |
| 4 | MOH1    | YBL049W   | -      | YPDcl3  | -       | -       | -      | YPDnc1 | -      | -      | -       | -       | -       | Galnc1 | Galnc2 |
| 4 | COX6    | YHR051W   | -      | -       | -       | -       | -      | YPDnc1 | -      | -      | -       | EtOHnc1 | EtOHnc2 | -      | Galnc2 |
| 4 | DBP1    | YPL119C   | -      | -       | -       | EtOHcl2 | Galcl1 | -      | -      | -      | -       | EtOHnc1 | -       | Galnc1 | -      |
| 4 |         | YHR032W   | YPDcl2 | -       | EtOHcl1 | -       | -      | YPDnc1 | -      | -      | -       | -       | -       | -      | Galnc2 |
| 4 |         | YNL181W   | -      | -       | -       | -       | -      | YPDnc1 | -      | -      | -       | EtOHnc1 | -       | Galnc1 | Galnc2 |
| 4 |         | YDR366C   | -      | -       | EtOHcl1 | -       | -      | -      | -      | -      | -       | EtOHnc1 | EtOHnc2 | Galnc1 | -      |
| 4 | CPR6    | YLR216C   | YPDcl2 | -       | EtOHcl1 | -       | Galcl1 | -      | -      | -      | YPDnc4  | -       | -       | -      | -      |
| 4 | LYS2    | YBR115C   | -      | -       | EtOHcl1 | -       | Galcl1 | -      | YPDnc2 | -      | YPDnc4  | -       | -       | -      | -      |
| 4 | ESF1    | YDR365C   | -      | -       | -       | EtOHcl2 | -      | YPDnc1 | -      | -      | -       | -       | -       | Galnc1 | Galnc2 |



|   |        |           |        |        |         |         |        |        |        |        |        |         |         |        |        |
|---|--------|-----------|--------|--------|---------|---------|--------|--------|--------|--------|--------|---------|---------|--------|--------|
| 4 | CPT1   | YNL130C   | YPDcl2 | -      | -       | EtOHcl2 | Galcl1 | -      | -      | -      | YPDnc4 | -       | -       | -      | -      |
| 4 |        | YDR381C-A | -      | -      | -       | -       | Galcl1 | YPDnc1 | -      | -      | -      | EtOHnc1 | EtOHnc2 | -      | -      |
| 4 |        | YFR032C-B | -      | -      | EtOHcl1 | -       | -      | -      | -      | YPDnc3 | -      | -       | EtOHnc2 | -      | Galnc2 |
| 4 | ELO1   | YJL196C   | YPDcl2 | -      | -       | -       | Galcl1 | YPDnc1 | -      | -      | -      | EtOHnc1 | -       | -      | -      |
| 4 | THO1   | YER063W   | -      | -      | -       | -       | -      | YPDnc1 | -      | -      | -      | EtOHnc1 | -       | Galnc1 | Galnc2 |
| 4 | MMS1   | YPR164W   | -      | -      | EtOHcl1 | -       | -      | YPDnc1 | -      | -      | -      | EtOHnc1 | -       | -      | Galnc2 |
| 4 |        | YLR280C   | -      | -      | -       | -       | -      | YPDnc1 | -      | -      | -      | EtOHnc1 | EtOHnc2 | Galnc1 | -      |
| 4 | IRC16  | YPR038W   | YPDcl2 | -      | EtOHcl1 | -       | -      | -      | -      | -      | -      | EtOHnc1 | EtOHnc2 | -      | -      |
| 4 | MRL1   | YPR079W   | -      | YPDcl3 | -       | -       | Galcl1 | -      | -      | -      | -      | EtOHnc1 | -       | Galnc1 | -      |
| 4 | ITC1   | YGL133W   | -      | -      | -       | -       | -      | -      | YPDnc2 | YPDnc3 | -      | EtOHnc1 | -       | -      | Galnc2 |
| 4 | BNA2   | YJR078W   | -      | -      | -       | -       | -      | YPDnc1 | -      | -      | -      | EtOHnc1 | -       | Galnc1 | Galnc2 |
| 4 | DMC1   | YER179W   | -      | -      | -       | -       | -      | YPDnc1 | -      | -      | YPDnc4 | EtOHnc1 | -       | -      | Galnc2 |
| 4 | RPL31B | YLR406C   | -      | -      | -       | EtOHcl2 | Galcl1 | -      | -      | -      | -      | -       | EtOHnc2 | Galnc1 | -      |
| 4 | RPL7B  | YPL198W   | -      | -      | -       | EtOHcl2 | Galcl1 | -      | -      | -      | YPDnc4 | -       | EtOHnc2 | -      | -      |
| 4 | UTP8   | YGR128C   | -      | -      | -       | -       | Galcl1 | -      | YPDnc2 | -      | -      | EtOHnc1 | -       | Galnc1 | -      |
| 4 | GYL1   | YMR192W   | YPDcl2 | -      | EtOHcl1 | -       | Galcl1 | -      | -      | -      | YPDnc4 | -       | -       | -      | -      |
| 4 | ILV3   | YJR016C   | -      | -      | EtOHcl1 | -       | -      | -      | -      | -      | -      | EtOHnc1 | -       | Galnc1 | Galnc2 |
| 4 | RPL29  | YFR032C-A | -      | -      | EtOHcl1 | -       | Galcl1 | YPDnc1 | -      | -      | -      | -       | -       | -      | Galnc2 |
| 4 |        | YGR025W   | -      | -      | -       | -       | Galcl1 | -      | YPDnc2 | -      | YPDnc4 | -       | -       | Galnc1 | -      |
| 4 |        | YAL045C   | -      | -      | -       | EtOHcl2 | Galcl1 | -      | -      | -      | -      | EtOHnc1 | -       | -      | Galnc2 |
| 4 | RRP17  | YDR412W   | -      | -      | -       | -       | Galcl1 | YPDnc1 | -      | -      | -      | -       | EtOHnc2 | -      | Galnc2 |
| 4 | RPC34  | YNR003C   | -      | -      | -       | -       | Galcl1 | -      | YPDnc2 | -      | -      | -       | -       | Galnc1 | Galnc2 |
| 4 | LSM8   | YJR022W   | -      | YPDcl3 | -       | -       | Galcl1 | -      | -      | YPDnc3 | -      | -       | -       | -      | Galnc2 |
| 4 |        | YER188W   | -      | -      | -       | -       | -      | YPDnc1 | -      | -      | -      | EtOHnc1 | -       | Galnc1 | Galnc2 |
| 4 | RPL13B | YMR142C   | YPDcl2 | -      | -       | -       | Galcl1 | YPDnc1 | -      | -      | -      | -       | -       | Galnc1 | -      |
| 4 | NPL3   | YDR432W   | YPDcl2 | -      | EtOHcl1 | -       | Galcl1 | -      | -      | -      | YPDnc4 | -       | -       | -      | -      |
| 4 | SEC10  | YLR166C   | YPDcl2 | -      | EtOHcl1 | -       | Galcl1 | -      | -      | YPDnc3 | -      | -       | -       | -      | -      |
| 4 | KIN4   | YOR233W   | -      | YPDcl3 | EtOHcl1 | -       | Galcl1 | YPDnc1 | -      | -      | -      | -       | -       | -      | -      |
| 4 |        | YCR102W-1 | -      | -      | EtOHcl1 | -       | -      | -      | -      | -      | YPDnc4 | -       | -       | Galnc1 | Galnc2 |
| 4 | AMA1   | YGR225W   | -      | -      | -       | -       | Galcl1 | -      | -      | -      | YPDnc4 | EtOHnc1 | -       | Galnc1 | -      |
| 4 | RNR1   | YER070W   | -      | -      | -       | -       | -      | YPDnc1 | -      | -      | YPDnc4 | -       | -       | Galnc1 | Galnc2 |
| 4 |        | YOR019W   | -      | -      | -       | -       | Galcl1 | -      | -      | -      | -      | EtOHnc1 | EtOHnc2 | -      | Galnc2 |
| 4 | RCR2   | YDR003W   | -      | -      | -       | -       | -      | YPDnc1 | -      | -      | -      | EtOHnc1 | -       | Galnc1 | Galnc2 |
| 4 |        | YKL066W   | YPDcl2 | YPDcl3 | -       | -       | -      | -      | -      | YPDnc3 | YPDnc4 | -       | -       | -      | -      |





|   |         |           |        |         |         |         |        |        |        |        |         |         |        |        |
|---|---------|-----------|--------|---------|---------|---------|--------|--------|--------|--------|---------|---------|--------|--------|
| 3 | YMR185W | -         | -      | EtOHcl1 | -       | Galcl1  | -      | -      | -      | YPDnc4 | -       | -       | -      | -      |
| 3 | VMA13   | YPR036W   | -      | -       | EtOHcl1 | -       | Galcl1 | -      | -      | YPDnc3 | -       | -       | -      | -      |
| 3 | VPS63   | YLR261C   | YPDcl2 | -       | -       | EtOHcl2 | Galcl1 | -      | -      | -      | -       | -       | -      | -      |
| 3 | FKS3    | YMR306W   | -      | -       | EtOHcl1 | -       | -      | -      | -      | -      | -       | -       | Galnc1 | Galnc2 |
| 3 | CDC55   | YGL190C   | YPDcl2 | -       | EtOHcl1 | -       | -      | -      | -      | -      | -       | -       | -      | Galnc2 |
| 3 | TOS4    | YLR183C   | -      | -       | -       | -       | -      | -      | YPDnc3 | YPDnc4 | -       | -       | -      | Galnc2 |
| 3 | PRS1    | YKL181W   | YPDcl2 | -       | -       | -       | -      | -      | YPDnc3 | -      | -       | -       | -      | Galnc2 |
| 3 | ETR1    | YBR026C   | -      | YPDcl3  | -       | -       | Galcl1 | -      | -      | -      | -       | -       | Galnc1 | -      |
| 3 |         | YDR509W   | -      | -       | EtOHcl1 | -       | -      | YPDnc1 | -      | -      | EtOHnc1 | -       | -      | -      |
| 3 | RPL20B  | YOR312C   | YPDcl2 | -       | -       | -       | -      | YPDnc1 | -      | -      | YPDnc4  | -       | -      | -      |
| 3 | ARR1    | YPR199C   | -      | -       | -       | -       | Galcl1 | YPDnc1 | -      | YPDnc3 | -       | -       | -      | -      |
| 3 | ALD5    | YER073W   | -      | YPDcl3  | -       | -       | Galcl1 | -      | -      | YPDnc3 | -       | -       | -      | -      |
| 3 |         | YLR415C   | -      | -       | -       | -       | Galcl1 | YPDnc1 | -      | -      | YPDnc4  | -       | -      | -      |
| 3 | EMI1    | YDR512C   | -      | -       | -       | -       | Galcl1 | YPDnc1 | -      | -      | EtOHnc1 | -       | -      | -      |
| 3 | HSL1    | YKL101W   | -      | YPDcl3  | -       | -       | -      | -      | -      | -      | YPDnc4  | EtOHnc1 | -      | -      |
| 3 | NCE102  | YPR149W   | -      | -       | EtOHcl1 | -       | -      | YPDnc1 | -      | -      | EtOHnc1 | -       | -      | -      |
| 3 | SKI2    | YLR398C   | -      | -       | -       | -       | Galcl1 | YPDnc1 | -      | -      | -       | -       | -      | Galnc2 |
| 3 | PUT2    | YHR037W   | -      | -       | -       | EtOHcl2 | Galcl1 | -      | -      | -      | EtOHnc1 | -       | -      | -      |
| 3 | YAH1    | YPL252C   | -      | -       | -       | -       | Galcl1 | -      | -      | -      | YPDnc4  | EtOHnc2 | -      | -      |
| 3 |         | YLR285C-A | -      | -       | -       | -       | -      | YPDnc2 | -      | YPDnc4 | EtOHnc1 | -       | -      | -      |
| 3 | RTS1    | YOR014W   | YPDcl2 | -       | -       | -       | Galcl1 | -      | -      | -      | YPDnc4  | -       | -      | -      |
| 3 | PAU9    | YBL108C-A | -      | -       | -       | -       | -      | -      | -      | -      | EtOHnc1 | -       | Galnc1 | Galnc2 |
| 3 |         | YMR086W   | YPDcl2 | -       | EtOHcl1 | -       | Galcl1 | -      | -      | -      | -       | -       | -      | -      |
| 3 | FRS1    | YLR060W   | -      | -       | EtOHcl1 | -       | Galcl1 | -      | -      | -      | -       | EtOHnc2 | -      | -      |
| 3 |         | YGR031W   | YPDcl2 | -       | -       | -       | Galcl1 | -      | -      | -      | -       | -       | -      | Galnc2 |
| 3 | APC4    | YDR118W   | YPDcl2 | YPDcl3  | -       | -       | Galcl1 | -      | -      | -      | -       | -       | -      | -      |
| 3 |         | YOL134C   | -      | -       | -       | EtOHcl2 | -      | -      | -      | -      | EtOHnc1 | -       | Galnc1 | -      |
| 3 |         | YAL016C-A | -      | -       | -       | -       | -      | YPDnc1 | -      | -      | EtOHnc1 | -       | Galnc1 | -      |
| 3 | PPH21   | YDL134C   | YPDcl2 | -       | -       | -       | Galcl1 | YPDnc1 | -      | -      | -       | -       | -      | -      |
| 3 | SCD6    | YPR129W   | -      | -       | -       | -       | -      | YPDnc1 | -      | YPDnc3 | -       | -       | -      | Galnc2 |
| 3 | SNA3    | YJL151C   | YPDcl2 | YPDcl3  | -       | -       | Galcl1 | -      | -      | -      | -       | -       | -      | -      |
| 3 | ALF1    | YNL148C   | YPDcl2 | -       | -       | EtOHcl2 | Galcl1 | -      | -      | -      | -       | -       | -      | -      |
| 3 | RPL21A  | YBR191W   | YPDcl2 | YPDcl3  | -       | -       | Galcl1 | -      | -      | -      | -       | -       | -      | -      |
| 3 | CCW12   | YLR110C   | -      | -       | EtOHcl1 | -       | -      | YPDnc1 | -      | -      | EtOHnc1 | -       | -      | -      |

|   |           |           |        |         |         |         |        |        |        |        |         |         |         |        |
|---|-----------|-----------|--------|---------|---------|---------|--------|--------|--------|--------|---------|---------|---------|--------|
| 3 | YGR117C   | YPDcl2    | -      | -       | -       | Galcl1  | -      | -      | -      | -      | -       | -       | Galnc1  | -      |
| 3 | CNA1      | YLR433C   | YPDcl2 | -       | -       | -       | Galcl1 | -      | -      | -      | YPDnc4  | -       | -       | -      |
| 3 | TDA3      | YHR009C   | -      | -       | -       | -       | Galcl1 | -      | -      | -      | -       | -       | Galnc1  | Galnc2 |
| 3 | YBR126W   | -         | -      | -       | -       | -       | -      | YPDnc1 | YPDnc2 | YPDnc3 | -       | -       | -       | -      |
| 3 | RPN7      | YPR108W   | -      | -       | EtOHcl1 | -       | -      | -      | YPDnc2 | -      | -       | -       | Galnc1  | -      |
| 3 | YIR016W   | -         | -      | -       | EtOHcl1 | -       | -      | -      | YPDnc2 | -      | -       | EtOHnc1 | -       | -      |
| 3 | SRP102    | YKL154W   | -      | -       | EtOHcl1 | -       | -      | -      | -      | YPDnc3 | -       | -       | Galnc1  | -      |
| 3 | VPS5      | YOR069W   | -      | -       | -       | -       | Galcl1 | -      | -      | YPDnc3 | -       | -       | Galnc1  | -      |
| 3 | CIN2      | YPL241C   | YPDcl2 | YPDcl3  | -       | -       | Galcl1 | -      | -      | -      | -       | -       | -       | -      |
| 3 | SIP5      | YMR140W   | -      | -       | -       | -       | Galcl1 | -      | -      | -      | -       | -       | Galnc1  | Galnc2 |
| 3 | YNL120C   | -         | -      | -       | -       | -       | Galcl1 | YPDnc1 | -      | -      | -       | -       | -       | Galnc2 |
| 3 | PAU17     | YLL025W   | -      | -       | -       | -       | -      | YPDnc1 | -      | -      | -       | -       | EtOHnc2 | Galnc1 |
| 3 | IXR1      | YKL032C   | -      | -       | EtOHcl1 | -       | -      | YPDnc1 | -      | -      | -       | -       | -       | Galnc2 |
| 3 | FMP32     | YFL046W   | -      | -       | -       | -       | Galcl1 | -      | -      | -      | -       | EtOHnc1 | Galnc1  | -      |
| 3 | GDI1      | YER136W   | -      | -       | -       | -       | -      | YPDnc1 | -      | -      | -       | EtOHnc1 | Galnc1  | -      |
| 3 | YPR099C   | -         | -      | EtOHcl1 | EtOHcl2 | Galcl1  | -      | -      | -      | -      | -       | -       | -       | -      |
| 3 | YGR071C   | YPDcl2    | -      | -       | EtOHcl2 | Galcl1  | -      | -      | -      | -      | -       | -       | -       | -      |
| 3 | NUP170    | YBL079W   | YPDcl2 | -       | -       | -       | Galcl1 | -      | -      | -      | YPDnc4  | -       | -       | -      |
| 3 | YGL041C   | -         | -      | -       | -       | -       | -      | YPDnc2 | -      | YPDnc4 | -       | -       | -       | Galnc2 |
| 3 | NCP1      | YHR042W   | YPDcl2 | -       | -       | -       | -      | YPDnc2 | -      | -      | -       | -       | -       | Galnc2 |
| 3 | YLR366W   | YPDcl2    | YPDcl3 | -       | -       | -       | Galcl1 | -      | -      | -      | -       | -       | -       | -      |
| 3 | YBL039W-E | -         | -      | -       | -       | -       | -      | YPDnc1 | -      | -      | -       | EtOHnc1 | Galnc1  | -      |
| 3 | ICY2      | YPL250C   | -      | -       | EtOHcl1 | -       | -      | YPDnc1 | -      | -      | -       | -       | -       | Galnc2 |
| 3 | YKR104W   | -         | -      | -       | -       | -       | -      | -      | -      | YPDnc4 | EtOHnc1 | -       | -       | Galnc2 |
| 3 | MDM35     | YKL053C-A | -      | -       | EtOHcl1 | -       | -      | YPDnc1 | -      | -      | -       | EtOHnc1 | -       | -      |
| 3 | YDL187C   | -         | -      | -       | -       | -       | -      | YPDnc1 | -      | -      | -       | EtOHnc1 | Galnc1  | -      |
| 3 | YLR224W   | YPDcl2    | -      | -       | -       | -       | Galcl1 | -      | -      | YPDnc3 | -       | -       | -       | -      |
| 3 | ARF2      | YDL137W   | YPDcl2 | -       | EtOHcl1 | -       | -      | -      | -      | -      | -       | -       | -       | Galnc2 |
| 3 | RPA190    | YOR341W   | -      | -       | EtOHcl1 | -       | -      | YPDnc1 | -      | -      | YPDnc4  | -       | -       | -      |
| 2 | CUP1-2    | YHR055C   | -      | -       | -       | EtOHcl2 | -      | -      | -      | -      | -       | EtOHnc2 | -       | -      |
| 2 | PHO12     | YHR215W   | YPDcl2 | -       | -       | -       | Galcl1 | -      | -      | -      | -       | -       | -       | -      |
| 2 | YBR063C   | -         | -      | -       | -       | -       | Galcl1 | -      | -      | -      | YPDnc4  | -       | -       | -      |
| 2 | RHR2      | YIL053W   | -      | -       | -       | -       | -      | -      | YPDnc3 | -      | -       | -       | -       | Galnc2 |
| 2 | DOC1      | YGL240W   | -      | -       | -       | -       | -      | -      | -      | -      | -       | -       | Galnc1  | Galnc2 |







|   |        |           |        |   |         |         |        |        |        |   |   |   |         |          |
|---|--------|-----------|--------|---|---------|---------|--------|--------|--------|---|---|---|---------|----------|
| 1 | APC1   | YNL172W   | YPDcl2 | - | -       | -       | -      | -      | -      | - | - | - | -       | -        |
| 1 | CDC1   | YDR182W   | -      | - | -       | -       | -      | -      | -      | - | - | - | -       | Galnc1 - |
| 1 | DIE2   | YGR227W   | -      | - | -       | -       | -      | -      | -      | - | - | - | EtOHnc1 | -        |
| 1 |        | YDL063C   | -      | - | -       | -       | -      | -      | YPDnc2 | - | - | - | -       | -        |
| 1 | FCF1   | YDR339C   | -      | - | -       | EtOHcl2 | -      | -      | -      | - | - | - | -       | -        |
| 1 |        | YPL035C   | -      | - | -       | -       | Galcl1 | -      | -      | - | - | - | -       | -        |
| 1 | GCY1   | YOR120W   | -      | - | -       | -       | -      | -      | -      | - | - | - | -       | Galnc1 - |
| 1 |        | YGL188C-A | -      | - | -       | -       | -      | YPDnc1 | -      | - | - | - | -       | -        |
| 1 | HHF1   | YBR009C   | -      | - | EtOHcl1 | -       | -      | -      | -      | - | - | - | -       | -        |
| 1 | DUS4   | YLR405W   | -      | - | -       | -       | -      | -      | -      | - | - | - | EtOHnc1 | -        |
| 1 | GCN20  | YFR009W   | -      | - | -       | -       | Galcl1 | -      | -      | - | - | - | -       | -        |
| 1 |        | YNL171C   | YPDcl2 | - | -       | -       | -      | -      | -      | - | - | - | -       | -        |
| 1 | OPI9   | YLR338W   | -      | - | EtOHcl1 | -       | -      | -      | -      | - | - | - | -       | -        |
| 1 | RPS26A | YGL189C   | -      | - | -       | -       | -      | YPDnc1 | -      | - | - | - | -       | -        |
| 1 | VMA8   | YEL051W   | -      | - | -       | -       | -      | -      | -      | - | - | - | -       | Galnc1 - |
| 1 | ISC10  | YER180C   | -      | - | -       | -       | -      | -      | -      | - | - | - | EtOHnc1 | -        |
| 1 | NOP13  | YNL175C   | -      | - | -       | -       | Galcl1 | -      | -      | - | - | - | -       | -        |
| 1 | THI12  | YNL332W   | -      | - | EtOHcl1 | -       | -      | -      | -      | - | - | - | -       | -        |
| 1 |        | YER145C-A | -      | - | -       | -       | -      | -      | -      | - | - | - | -       | Galnc1 - |
| 1 | TRM5   | YHR070W   | -      | - | EtOHcl1 | -       | -      | -      | -      | - | - | - | -       | -        |
| 1 | PRE6   | YOL038W   | -      | - | -       | -       | -      | -      | -      | - | - | - | EtOHnc2 | -        |
